# Supplementary material for: Identifying the Immunological Gene Signatures of Immune Cell Subtypes
Source: Hindawi journal article supplement (doi:10.1155/2021/6639698), 2021-01-01
Supplement: f1 [file 6639698.f1.pdf]

**Table S1.** Ranked features by MCFS

| <b>Rank</b> | <b>Attribute</b> | <b>RI</b> | <b>Informative feature</b> |
|-------------|------------------|-----------|----------------------------|
| 1           | Ighv1-72         | 0.7660    | Yes                        |
| 2           | Cd5              | 0.5902    | Yes                        |
| 3           | Klrb1b           | 0.5720    | Yes                        |
| 4           | Phka1            | 0.5535    | Yes                        |
| 5           | Trdv5            | 0.5223    | Yes                        |
| 6           | Trbj1-2          | 0.4789    | Yes                        |
| 7           | Trbj1-3          | 0.4752    | Yes                        |
| 8           | Tcrg-V4          | 0.4738    | Yes                        |
| 9           | Trbj1-7          | 0.4454    | Yes                        |
| 10          | Ebf1             | 0.4403    | Yes                        |
| 11          | Trbj1-6          | 0.4339    | Yes                        |
| 12          | Trbj1-5          | 0.4193    | Yes                        |
| 13          | Trdc             | 0.3999    | Yes                        |
| 14          | Gm42877          | 0.3489    | Yes                        |
| 15          | Trbc1            | 0.3397    | Yes                        |
| 16          | Cyp4f18          | 0.3280    | Yes                        |
| 17          | Aifm2            | 0.3269    | Yes                        |
| 18          | Blnk             | 0.3262    | Yes                        |
| 19          | Ighv1-75         | 0.3245    | Yes                        |
| 20          | Plscr1           | 0.3214    | Yes                        |
| 21          | Clnk             | 0.3173    | Yes                        |
| 22          | Ighv1-53         | 0.3136    | Yes                        |
| 23          | Cd16311          | 0.3107    | Yes                        |
| 24          | Rubcnl           | 0.2974    | Yes                        |
| 25          | Trbc2            | 0.2698    | Yes                        |
| 26          | Ighv1-76         | 0.2647    | Yes                        |
| 27          | Ighv9-3          | 0.2617    | Yes                        |
| 28          | Gm12158          | 0.2517    | Yes                        |
| 29          | Gata3            | 0.2485    | Yes                        |
| 30          | Trbj2-1          | 0.2470    | Yes                        |
| 31          | Cd79a            | 0.2449    | Yes                        |
| 32          | RP23-381H23.1    | 0.2403    | Yes                        |
| 33          | Tshz3            | 0.2332    | Yes                        |
| 34          | Ccr10            | 0.2276    | Yes                        |
| 35          | Dok3             | 0.2269    | Yes                        |
| 36          | Trbv12-2         | 0.2258    | Yes                        |
| 37          | Pde1c            | 0.2161    | Yes                        |
| 38          | Tnfsf12          | 0.2122    | Yes                        |
| 39          | Sox13            | 0.2046    | Yes                        |
| 40          | Tmem159          | 0.2025    | Yes                        |
| 41          | Gm43434          | 0.2019    | Yes                        |
| 42          | Pax5             | 0.1990    | Yes                        |
| 43          | Trav13-4-dv7     | 0.1959    | Yes                        |

|    |               |        |     |
|----|---------------|--------|-----|
| 44 | Trbj2-6       | 0.1950 | Yes |
| 45 | Skap1         | 0.1888 | Yes |
| 46 | Trbj1-4       | 0.1749 | Yes |
| 47 | Mzb1          | 0.1741 | Yes |
| 48 | Cd3e          | 0.1665 | Yes |
| 49 | Spry2         | 0.1651 | Yes |
| 50 | Pkig          | 0.1582 | Yes |
| 51 | Gem           | 0.1516 | Yes |
| 52 | Gm37452       | 0.1514 | Yes |
| 53 | Als2cl        | 0.1491 | Yes |
| 54 | Cd19          | 0.1459 | Yes |
| 55 | Plscr4        | 0.1452 | Yes |
| 56 | Prkch         | 0.1391 | Yes |
| 57 | Adamts10      | 0.1383 | Yes |
| 58 | Ighv1-69      | 0.1363 | Yes |
| 59 | Trgv2         | 0.1309 | Yes |
| 60 | Ighv1-64      | 0.1295 | Yes |
| 61 | Lat           | 0.1286 | Yes |
| 62 | 5830411N06Rik | 0.1285 | Yes |
| 63 | Cpne7         | 0.1269 | Yes |
| 64 | Igsf5         | 0.1268 | Yes |
| 65 | Bcl11b        | 0.1262 | Yes |
| 66 | Plekhg5       | 0.1223 | Yes |
| 67 | Dpp4          | 0.1218 | Yes |
| 68 | Pld1          | 0.1215 | Yes |
| 69 | Trgj4         | 0.1174 | Yes |
| 70 | Abcb9         | 0.1161 | Yes |
| 71 | Tnfrsf13c     | 0.1146 | Yes |
| 72 | Meis1         | 0.1143 | Yes |
| 73 | Celsr1        | 0.1136 | Yes |
| 74 | 8-Mar         | 0.1105 | Yes |
| 75 | Ass1          | 0.1104 | Yes |
| 76 | Itk           | 0.1100 | Yes |
| 77 | 5730488B01Rik | 0.1095 | Yes |
| 78 | Trdj2         | 0.1082 | Yes |
| 79 | Ii21r         | 0.1042 | Yes |
| 80 | Gm16602       | 0.1041 | Yes |
| 81 | Siglecg       | 0.1016 | Yes |
| 82 | Adgr11        | 0.0978 | Yes |
| 83 | Gm26857       | 0.0967 | Yes |
| 84 | Blk           | 0.0961 | Yes |
| 85 | Unc93b1       | 0.0943 | No  |
| 86 | Vpreb3        | 0.0894 | No  |
| 87 | Ighv1-82      | 0.0887 | No  |
| 88 | Gm5424        | 0.0880 | No  |
| 89 | Chst3         | 0.0873 | No  |

|     |               |        |    |
|-----|---------------|--------|----|
| 90  | Basp1         | 0.0868 | No |
| 91  | Phgdh         | 0.0840 | No |
| 92  | Trdv4         | 0.0839 | No |
| 93  | RP23-284E19.8 | 0.0832 | No |
| 94  | Tnfrsf13b     | 0.0796 | No |
| 95  | Ncr1          | 0.0793 | No |
| 96  | Ighv8-12      | 0.0785 | No |
| 97  | Trbj2-7       | 0.0784 | No |
| 98  | Elmo2         | 0.0784 | No |
| 99  | Gm16316       | 0.0775 | No |
| 100 | Ighv1-26      | 0.0760 | No |
| 101 | Lcp2          | 0.0755 | No |
| 102 | 1110028F11Rik | 0.0739 | No |
| 103 | Ighm          | 0.0738 | No |
| 104 | Ighv1-9       | 0.0735 | No |
| 105 | Klrbl         | 0.0727 | No |
| 106 | Tcrg-V3       | 0.0721 | No |
| 107 | Ighv14-2      | 0.0697 | No |
| 108 | Lyn           | 0.0691 | No |
| 109 | Ighv1-80      | 0.0685 | No |
| 110 | Thy1          | 0.0683 | No |
| 111 | Crygn         | 0.0644 | No |
| 112 | Vcl           | 0.0639 | No |
| 113 | Prkcd         | 0.0635 | No |
| 114 | Ighv1-42      | 0.0626 | No |
| 115 | Trbv13-2      | 0.0623 | No |
| 116 | Cd3g          | 0.0604 | No |
| 117 | Ferla         | 0.0587 | No |
| 118 | 2010300F17Rik | 0.0570 | No |
| 119 | Themis        | 0.0565 | No |
| 120 | Rasal1        | 0.0560 | No |
| 121 | RP23-284E19.9 | 0.0552 | No |
| 122 | Trbv15        | 0.0548 | No |
| 123 | Snx8          | 0.0531 | No |
| 124 | Prkceq        | 0.0530 | No |
| 125 | Gcnt1         | 0.0522 | No |
| 126 | Cyp4v3        | 0.0518 | No |
| 127 | Srgap3        | 0.0516 | No |
| 128 | Cd79b         | 0.0515 | No |
| 129 | Slc16a1       | 0.0513 | No |
| 130 | Enpp5         | 0.0505 | No |
| 131 | Aldh3b1       | 0.0504 | No |
| 132 | Tcf7          | 0.0497 | No |
| 133 | Trbj1-1       | 0.0481 | No |
| 134 | Ighv5-2       | 0.0456 | No |
| 135 | Ly86          | 0.0443 | No |

|     |               |        |    |
|-----|---------------|--------|----|
| 136 | Sox5os4       | 0.0443 | No |
| 137 | Slamf1        | 0.0439 | No |
| 138 | Aoah          | 0.0438 | No |
| 139 | Ighv10-3      | 0.0429 | No |
| 140 | Neur13        | 0.0426 | No |
| 141 | Cobll1        | 0.0425 | No |
| 142 | RP23-181A8.7  | 0.0420 | No |
| 143 | E230020A03Rik | 0.0416 | No |
| 144 | Gm26978       | 0.0407 | No |
| 145 | Tcrg-C4       | 0.0403 | No |
| 146 | Fam169b       | 0.0394 | No |
| 147 | Trbj2-4       | 0.0391 | No |
| 148 | Ikbip         | 0.0388 | No |
| 149 | Fgl2          | 0.0383 | No |
| 150 | Hdac9         | 0.0381 | No |
| 151 | Prps1         | 0.0377 | No |
| 152 | Mef2c         | 0.0376 | No |
| 153 | Ighv1-81      | 0.0371 | No |
| 154 | Olfir525      | 0.0368 | No |
| 155 | Ifi2712a      | 0.0361 | No |
| 156 | Ubfd1         | 0.0361 | No |
| 157 | Sox5os2       | 0.0361 | No |
| 158 | Ighv1-66      | 0.0360 | No |
| 159 | Cd3d          | 0.0360 | No |
| 160 | Cd96          | 0.0353 | No |
| 161 | Tcf4          | 0.0347 | No |
| 162 | Tubb5         | 0.0347 | No |
| 163 | Acvr2a        | 0.0344 | No |
| 164 | Dvl3          | 0.0342 | No |
| 165 | Pitpnc1       | 0.0331 | No |
| 166 | Banp          | 0.0329 | No |
| 167 | Dennd5b       | 0.0324 | No |
| 168 | Rgs18         | 0.0320 | No |
| 169 | Sgcb          | 0.0316 | No |
| 170 | Cecr2         | 0.0315 | No |
| 171 | Gm44135       | 0.0315 | No |
| 172 | Lrrn4         | 0.0308 | No |
| 173 | Naip5         | 0.0307 | No |
| 174 | Bdh1          | 0.0305 | No |
| 175 | Trat1         | 0.0305 | No |
| 176 | Pea15a        | 0.0298 | No |
| 177 | Ighv1-67      | 0.0296 | No |
| 178 | Zfp462        | 0.0293 | No |
| 179 | Josd2         | 0.0290 | No |
| 180 | H2-Eb2        | 0.0290 | No |
| 181 | Pou2af1       | 0.0285 | No |

|     |               |        |    |
|-----|---------------|--------|----|
| 182 | Fer           | 0.0284 | No |
| 183 | Klri1         | 0.0284 | No |
| 184 | Trbv3         | 0.0281 | No |
| 185 | Cd180         | 0.0281 | No |
| 186 | Gm37035       | 0.0280 | No |
| 187 | Ighj3         | 0.0277 | No |
| 188 | Cd226         | 0.0270 | No |
| 189 | Gm37065       | 0.0269 | No |
| 190 | Plcg1         | 0.0263 | No |
| 191 | Arhgap17      | 0.0263 | No |
| 192 | Kcnk1         | 0.0262 | No |
| 193 | Pkd1l2        | 0.0258 | No |
| 194 | Scn4a         | 0.0251 | No |
| 195 | Tiam2         | 0.0249 | No |
| 196 | 2010007H06Rik | 0.0249 | No |
| 197 | 4933428C19Rik | 0.0247 | No |
| 198 | Olfm1         | 0.0235 | No |
| 199 | Olfir527      | 0.0231 | No |
| 200 | Zfp296        | 0.0231 | No |
| 201 | Clnkos        | 0.0231 | No |
| 202 | Trbj2-5       | 0.0229 | No |
| 203 | Aak1          | 0.0220 | No |
| 204 | Oplah         | 0.0220 | No |
| 205 | Pkp2          | 0.0220 | No |
| 206 | Cyp27a1       | 0.0219 | No |
| 207 | Ighv1-18      | 0.0218 | No |
| 208 | Wwp2          | 0.0218 | No |
| 209 | Gm684         | 0.0217 | No |
| 210 | Fes           | 0.0217 | No |
| 211 | Cyp4f16       | 0.0214 | No |
| 212 | Btk           | 0.0213 | No |
| 213 | Rasgrp3       | 0.0212 | No |
| 214 | Grk5          | 0.0210 | No |
| 215 | Tns4          | 0.0206 | No |
| 216 | Ighv1-74      | 0.0206 | No |
| 217 | Kif19a        | 0.0203 | No |
| 218 | D430040D24Rik | 0.0202 | No |
| 219 | RP23-357C16.1 | 0.0200 | No |
| 220 | Oas2          | 0.0200 | No |
| 221 | Tcrg-C3       | 0.0197 | No |
| 222 | Rps4l         | 0.0197 | No |
| 223 | Gm28836       | 0.0197 | No |
| 224 | Ak8           | 0.0191 | No |
| 225 | Myo5a         | 0.0191 | No |
| 226 | Igkc          | 0.0185 | No |
| 227 | Pde4a         | 0.0183 | No |

|     |               |        |    |
|-----|---------------|--------|----|
| 228 | Sat1          | 0.0183 | No |
| 229 | Nrp2          | 0.0183 | No |
| 230 | Nlrc3         | 0.0182 | No |
| 231 | Fcgr3         | 0.0181 | No |
| 232 | Man1c1        | 0.0181 | No |
| 233 | Arap3         | 0.0181 | No |
| 234 | Gm44068       | 0.0179 | No |
| 235 | Csf2rb        | 0.0178 | No |
| 236 | Blvrb         | 0.0178 | No |
| 237 | Ighd1-1       | 0.0176 | No |
| 238 | 5031439G07Rik | 0.0176 | No |
| 239 | Bank1         | 0.0176 | No |
| 240 | Gm2539        | 0.0172 | No |
| 241 | Trbj2-2       | 0.0172 | No |
| 242 | Spi1          | 0.0170 | No |
| 243 | Gm45456       | 0.0167 | No |
| 244 | 5031425F14Rik | 0.0165 | No |
| 245 | Rnase12       | 0.0165 | No |
| 246 | Igkv6-25      | 0.0164 | No |
| 247 | Ighv10-1      | 0.0158 | No |
| 248 | Cd6           | 0.0156 | No |
| 249 | Sox5          | 0.0156 | No |
| 250 | Abtb2         | 0.0155 | No |
| 251 | Gm27234       | 0.0154 | No |
| 252 | Gm37537       | 0.0154 | No |
| 253 | Fcer1g        | 0.0153 | No |
| 254 | Cntnap1       | 0.0152 | No |
| 255 | Pde7a         | 0.0152 | No |
| 256 | Ighv1-7       | 0.0149 | No |
| 257 | Pdia4         | 0.0147 | No |
| 258 | Igkj4         | 0.0146 | No |
| 259 | Naip6         | 0.0146 | No |
| 260 | Lpar6         | 0.0144 | No |
| 261 | Pde4d         | 0.0142 | No |
| 262 | Lmo2          | 0.0139 | No |
| 263 | Sh3bgrl2      | 0.0138 | No |
| 264 | Gm26632       | 0.0137 | No |
| 265 | 1700084J12Rik | 0.0136 | No |
| 266 | Prkacb        | 0.0133 | No |
| 267 | Fhl2          | 0.0133 | No |
| 268 | Rassf4        | 0.0131 | No |
| 269 | Cd81          | 0.0130 | No |
| 270 | Noct          | 0.0130 | No |
| 271 | Gm11805       | 0.0130 | No |
| 272 | Bvht          | 0.0130 | No |
| 273 | E330020D12Rik | 0.0129 | No |

|     |               |        |    |
|-----|---------------|--------|----|
| 274 | Cd200r4       | 0.0128 | No |
| 275 | Camk2g        | 0.0128 | No |
| 276 | Prdm11        | 0.0127 | No |
| 277 | Derl3         | 0.0127 | No |
| 278 | Klf12         | 0.0127 | No |
| 279 | Mpv17         | 0.0124 | No |
| 280 | Bfsp2         | 0.0124 | No |
| 281 | Ighv1-59      | 0.0123 | No |
| 282 | Prkd3         | 0.0122 | No |
| 283 | S100a1        | 0.0122 | No |
| 284 | Gm29462       | 0.0122 | No |
| 285 | 1700016H13Rik | 0.0122 | No |
| 286 | Gm45183       | 0.0122 | No |
| 287 | Pdlim3        | 0.0121 | No |
| 288 | Ighv1-78      | 0.0120 | No |
| 289 | Ighv1-39      | 0.0120 | No |
| 290 | Klrg1         | 0.0116 | No |
| 291 | Selenbp1      | 0.0115 | No |
| 292 | Sox5it        | 0.0115 | No |
| 293 | Trbd1         | 0.0115 | No |
| 294 | Igkj3         | 0.0115 | No |
| 295 | Ighv2-2       | 0.0115 | No |
| 296 | Eya2          | 0.0114 | No |
| 297 | Fam20b        | 0.0114 | No |
| 298 | Chrac1        | 0.0114 | No |
| 299 | Rbpms         | 0.0113 | No |
| 300 | Tlr9          | 0.0111 | No |
| 301 | Tcn2          | 0.0110 | No |
| 302 | H2-DMb2       | 0.0110 | No |
| 303 | Tmem221       | 0.0109 | No |
| 304 | Gm16158       | 0.0108 | No |
| 305 | Ndrp2         | 0.0108 | No |
| 306 | Tuba1b        | 0.0108 | No |
| 307 | Gm26551       | 0.0107 | No |
| 308 | Arrdc4        | 0.0107 | No |
| 309 | Tgm3          | 0.0107 | No |
| 310 | Prcp          | 0.0107 | No |
| 311 | Gm38340       | 0.0107 | No |
| 312 | Scarb1        | 0.0106 | No |
| 313 | Zfp768        | 0.0106 | No |
| 314 | Gm7104        | 0.0106 | No |
| 315 | Klrb1a        | 0.0105 | No |
| 316 | Pnpla5        | 0.0105 | No |
| 317 | Gm11437       | 0.0105 | No |
| 318 | Mob3a         | 0.0104 | No |
| 319 | Dlc1          | 0.0102 | No |

|     |                |        |    |
|-----|----------------|--------|----|
| 320 | Tcrg-C1        | 0.0102 | No |
| 321 | Trav15-2-dv6-2 | 0.0101 | No |
| 322 | Sema4c         | 0.0101 | No |
| 323 | Trgj2          | 0.0100 | No |
| 324 | Gm12507        | 0.0099 | No |
| 325 | Dmpk           | 0.0098 | No |
| 326 | Vmn1r74        | 0.0098 | No |
| 327 | Prpt1          | 0.0098 | No |
| 328 | Myo18a         | 0.0097 | No |
| 329 | Tcrg-C2        | 0.0097 | No |
| 330 | Igkv9-124      | 0.0096 | No |
| 331 | Pttglip        | 0.0096 | No |
| 332 | Rad54l2        | 0.0095 | No |
| 333 | Lck            | 0.0094 | No |
| 334 | Igkv19-93      | 0.0093 | No |
| 335 | Igkv5-48       | 0.0093 | No |
| 336 | Sla2           | 0.0092 | No |
| 337 | Tmem35b        | 0.0092 | No |
| 338 | Sptssb         | 0.0092 | No |
| 339 | Gm37169        | 0.0091 | No |
| 340 | Vmn1r58        | 0.0091 | No |
| 341 | Gm28374        | 0.0090 | No |
| 342 | Trbv2          | 0.0089 | No |
| 343 | Ighv1-85       | 0.0089 | No |
| 344 | Sel1l          | 0.0088 | No |
| 345 | Gm37827        | 0.0088 | No |
| 346 | Cypt14         | 0.0087 | No |
| 347 | Ighv1-62-2     | 0.0086 | No |
| 348 | Tnik           | 0.0086 | No |
| 349 | Xlr4a          | 0.0086 | No |
| 350 | Olf1329        | 0.0085 | No |
| 351 | Gm11750        | 0.0085 | No |
| 352 | Cym            | 0.0085 | No |
| 353 | Ncbp1          | 0.0084 | No |
| 354 | Cyp2d40        | 0.0084 | No |
| 355 | Gbp8           | 0.0084 | No |
| 356 | Fuca2          | 0.0083 | No |
| 357 | Tab2           | 0.0083 | No |
| 358 | Ighv1-22       | 0.0083 | No |
| 359 | F2r            | 0.0083 | No |
| 360 | Ighv7-3        | 0.0082 | No |
| 361 | Map4k1         | 0.0082 | No |
| 362 | Smim14         | 0.0082 | No |
| 363 | Kctd11         | 0.0081 | No |
| 364 | Scd1           | 0.0081 | No |
| 365 | 4930412O13Rik  | 0.0081 | No |



|     |               |        |    |
|-----|---------------|--------|----|
| 366 | Spry4         | 0.0081 | No |
| 367 | B930095G15Rik | 0.0080 | No |
| 368 | Nelfb         | 0.0079 | No |
| 369 | RP23-355N5.6  | 0.0079 | No |
| 370 | Spaca9        | 0.0078 | No |
| 371 | 2010309G21Rik | 0.0078 | No |
| 372 | Ppm1h         | 0.0078 | No |
| 373 | Zap70         | 0.0077 | No |
| 374 | Bicd1         | 0.0077 | No |
| 375 | Gm5127        | 0.0077 | No |
| 376 | Klk1b8        | 0.0077 | No |
| 377 | Gm12753       | 0.0077 | No |
| 378 | Zfp105        | 0.0077 | No |
| 379 | Rab27b        | 0.0076 | No |
| 380 | Rhoh          | 0.0076 | No |
| 381 | Gm28363       | 0.0075 | No |
| 382 | Utrn          | 0.0075 | No |
| 383 | Casr          | 0.0075 | No |
| 384 | Rnase6        | 0.0073 | No |
| 385 | Inpp5d        | 0.0073 | No |
| 386 | Igkj1         | 0.0073 | No |
| 387 | Os9           | 0.0073 | No |
| 388 | Hsd3b1        | 0.0073 | No |
| 389 | Ighv5-9-1     | 0.0073 | No |
| 390 | Igkv12-89     | 0.0072 | No |
| 391 | Gm27206       | 0.0072 | No |
| 392 | Gm42818       | 0.0072 | No |
| 393 | Podnl1        | 0.0072 | No |
| 394 | Fbxo27        | 0.0072 | No |
| 395 | Kctd15        | 0.0071 | No |
| 396 | Gon4l         | 0.0071 | No |
| 397 | Scgb2b23-ps   | 0.0071 | No |
| 398 | 2010111I01Rik | 0.0071 | No |
| 399 | Ar            | 0.0071 | No |
| 400 | Vmn1r-ps34    | 0.0070 | No |
| 401 | 1700112E06Rik | 0.0070 | No |
| 402 | Trav21-dv12   | 0.0069 | No |
| 403 | Pik3r1        | 0.0069 | No |
| 404 | Gm45430       | 0.0069 | No |
| 405 | Gm12462       | 0.0068 | No |
| 406 | Kifc5c-ps     | 0.0068 | No |
| 407 | Klra10        | 0.0068 | No |
| 408 | Scgb1b28-ps   | 0.0068 | No |
| 409 | Trav14-2      | 0.0067 | No |
| 410 | Trdv2-2       | 0.0067 | No |
| 411 | Gm23196       | 0.0067 | No |

|     |               |        |    |
|-----|---------------|--------|----|
| 412 | Lyl1          | 0.0067 | No |
| 413 | Trgj1         | 0.0067 | No |
| 414 | Vsig10        | 0.0067 | No |
| 415 | Shisa8        | 0.0067 | No |
| 416 | Gm14133       | 0.0067 | No |
| 417 | Palld         | 0.0067 | No |
| 418 | Id3           | 0.0066 | No |
| 419 | Fpr1          | 0.0066 | No |
| 420 | Hectd2        | 0.0066 | No |
| 421 | Sox5os5       | 0.0065 | No |
| 422 | Ighj4         | 0.0065 | No |
| 423 | Gm42614       | 0.0065 | No |
| 424 | Pctp          | 0.0065 | No |
| 425 | Prr5          | 0.0065 | No |
| 426 | Mir1938       | 0.0065 | No |
| 427 | 1700010B13Rik | 0.0064 | No |
| 428 | Ighv5-6       | 0.0063 | No |
| 429 | Pirt          | 0.0063 | No |
| 430 | Hes5          | 0.0063 | No |
| 431 | Pdlim7        | 0.0063 | No |
| 432 | Clec12b       | 0.0063 | No |
| 433 | Ehbp111       | 0.0063 | No |
| 434 | A530010F05Rik | 0.0063 | No |
| 435 | Gm42542       | 0.0062 | No |
| 436 | Gm16280       | 0.0062 | No |
| 437 | Dusp3         | 0.0062 | No |
| 438 | Rdh8          | 0.0062 | No |
| 439 | F2rl2         | 0.0061 | No |
| 440 | Cstf2t        | 0.0061 | No |
| 441 | Sh2b1         | 0.0061 | No |
| 442 | Gm6112        | 0.0061 | No |
| 443 | Iglv3         | 0.0060 | No |
| 444 | Gm15268       | 0.0060 | No |
| 445 | Cfap126       | 0.0060 | No |
| 446 | Fam129c       | 0.0060 | No |
| 447 | Prkx          | 0.0059 | No |
| 448 | Cdh3          | 0.0059 | No |
| 449 | Ago4          | 0.0058 | No |
| 450 | Gm24060       | 0.0058 | No |
| 451 | Pias3         | 0.0058 | No |
| 452 | Mrgprc4-ps    | 0.0058 | No |
| 453 | Gm15721       | 0.0057 | No |
| 454 | Gm2245        | 0.0057 | No |
| 455 | Cd8b1         | 0.0057 | No |
| 456 | Chadl         | 0.0057 | No |
| 457 | Sh2d2a        | 0.0057 | No |

|     |               |        |    |
|-----|---------------|--------|----|
| 458 | Trbv13-3      | 0.0056 | No |
| 459 | Camk2n1       | 0.0055 | No |
| 460 | Mpped2        | 0.0055 | No |
| 461 | Tmem181b-ps   | 0.0055 | No |
| 462 | Sh2d1a        | 0.0055 | No |
| 463 | Ighj2         | 0.0055 | No |
| 464 | Gm44472       | 0.0054 | No |
| 465 | Gm8992        | 0.0054 | No |
| 466 | Chst12        | 0.0054 | No |
| 467 | Olf1453       | 0.0053 | No |
| 468 | Trbv12-1      | 0.0053 | No |
| 469 | Trbv17        | 0.0053 | No |
| 470 | Trdv1         | 0.0053 | No |
| 471 | Mapk1ip1l     | 0.0053 | No |
| 472 | Naprt         | 0.0053 | No |
| 473 | H2-DMb1       | 0.0053 | No |
| 474 | Gm18828       | 0.0052 | No |
| 475 | Gm26532       | 0.0052 | No |
| 476 | Gm25995       | 0.0052 | No |
| 477 | Slc7a7        | 0.0052 | No |
| 478 | Srp3          | 0.0052 | No |
| 479 | Gm38277       | 0.0051 | No |
| 480 | Nipal1        | 0.0051 | No |
| 481 | Gm43385       | 0.0051 | No |
| 482 | Itga2         | 0.0051 | No |
| 483 | Gm15618       | 0.0050 | No |
| 484 | 4930517J16Rik | 0.0050 | No |
| 485 | Trbv5         | 0.0050 | No |
| 486 | Traj17        | 0.0050 | No |
| 487 | Abhd8         | 0.0050 | No |
| 488 | Tktl1         | 0.0050 | No |
| 489 | Plec          | 0.0050 | No |
| 490 | RP23-2D7.22   | 0.0050 | No |
| 491 | 2310001K20Rik | 0.0049 | No |
| 492 | Mir1953       | 0.0049 | No |
| 493 | Olf113        | 0.0049 | No |
| 494 | Iglv1         | 0.0049 | No |
| 495 | Olf1284       | 0.0049 | No |
| 496 | Ighv8-2       | 0.0049 | No |
| 497 | Gm44485       | 0.0049 | No |
| 498 | Gm18181       | 0.0049 | No |
| 499 | Mir1954       | 0.0048 | No |
| 500 | Gm13526       | 0.0048 | No |
| 501 | RP23-352M7.1  | 0.0048 | No |
| 502 | Gm43369       | 0.0048 | No |
| 503 | Gm38430       | 0.0048 | No |

|     |               |        |    |
|-----|---------------|--------|----|
| 504 | Slc1a3        | 0.0047 | No |
| 505 | Tpm1          | 0.0047 | No |
| 506 | Gm44222       | 0.0047 | No |
| 507 | Ighd          | 0.0047 | No |
| 508 | Foxa1         | 0.0047 | No |
| 509 | 3300005D01Rik | 0.0047 | No |
| 510 | 1810046K07Rik | 0.0047 | No |
| 511 | Tnnt1         | 0.0047 | No |
| 512 | Pigx          | 0.0047 | No |
| 513 | 1700097M23Rik | 0.0047 | No |
| 514 | Mir212        | 0.0046 | No |
| 515 | Gm25541       | 0.0046 | No |
| 516 | Plod2         | 0.0046 | No |
| 517 | Trbv16        | 0.0046 | No |
| 518 | Fam124b       | 0.0046 | No |
| 519 | Rapgef4       | 0.0046 | No |
| 520 | Ubash3a       | 0.0046 | No |
| 521 | Ighv8-8       | 0.0045 | No |
| 522 | Gm18796       | 0.0045 | No |
| 523 | Gm12223       | 0.0045 | No |
| 524 | CAA01064564.1 | 0.0045 | No |
| 525 | Olfr1342      | 0.0045 | No |
| 526 | Gm3054        | 0.0045 | No |
| 527 | Gm26259       | 0.0045 | No |
| 528 | Rhob          | 0.0044 | No |
| 529 | Gm8127        | 0.0044 | No |
| 530 | Olfr304       | 0.0044 | No |
| 531 | Gm42534       | 0.0044 | No |
| 532 | Cd72          | 0.0043 | No |
| 533 | Dnmbp         | 0.0043 | No |
| 534 | Gm17421       | 0.0043 | No |
| 535 | Gm23444       | 0.0043 | No |
| 536 | 1110059E24Rik | 0.0043 | No |
| 537 | Gm37712       | 0.0043 | No |
| 538 | Rabep1        | 0.0043 | No |
| 539 | Gm24858       | 0.0042 | No |
| 540 | Napsa         | 0.0042 | No |
| 541 | Gm36988       | 0.0042 | No |
| 542 | 1700036A12Rik | 0.0042 | No |
| 543 | Olfr1307      | 0.0042 | No |
| 544 | Igkv7-33      | 0.0042 | No |
| 545 | Igkv1-122     | 0.0041 | No |
| 546 | Mup-ps16      | 0.0041 | No |
| 547 | Olfr137       | 0.0041 | No |
| 548 | Gm24221       | 0.0041 | No |
| 549 | Olfr1159-ps1  | 0.0041 | No |

|     |               |        |    |
|-----|---------------|--------|----|
| 550 | Tmem14a       | 0.0041 | No |
| 551 | Irf2bpl       | 0.0041 | No |
| 552 | Trbv4         | 0.0041 | No |
| 553 | Tnfrsf9       | 0.0041 | No |
| 554 | Midn          | 0.0040 | No |
| 555 | Gm42934       | 0.0040 | No |
| 556 | Hpse          | 0.0040 | No |
| 557 | Vmn1r237      | 0.0040 | No |
| 558 | Vmn2r61       | 0.0040 | No |
| 559 | Gm23143       | 0.0040 | No |
| 560 | Fam159a       | 0.0039 | No |
| 561 | Casp9         | 0.0039 | No |
| 562 | A430093F15Rik | 0.0039 | No |
| 563 | Slc27a6       | 0.0039 | No |
| 564 | Gm20449       | 0.0039 | No |
| 565 | Traj43        | 0.0039 | No |
| 566 | Gm5185        | 0.0039 | No |
| 567 | Traj21        | 0.0039 | No |
| 568 | Galnt1        | 0.0039 | No |
| 569 | Olfr379-ps1   | 0.0038 | No |
| 570 | Matk          | 0.0038 | No |
| 571 | Ceacam1       | 0.0038 | No |
| 572 | Gm45104       | 0.0038 | No |
| 573 | Gm25866       | 0.0038 | No |
| 574 | Enpp4         | 0.0038 | No |
| 575 | Hba-a1        | 0.0038 | No |
| 576 | Gm6650        | 0.0038 | No |
| 577 | Rhno1         | 0.0038 | No |
| 578 | Gm15006       | 0.0038 | No |
| 579 | Olfr94        | 0.0038 | No |
| 580 | Hdac4         | 0.0038 | No |
| 581 | Gm43112       | 0.0037 | No |
| 582 | Vmn2r7        | 0.0037 | No |
| 583 | Gm12262       | 0.0037 | No |
| 584 | Trbv14        | 0.0037 | No |
| 585 | Rhoc          | 0.0037 | No |
| 586 | 4833413E03Rik | 0.0037 | No |
| 587 | Gm43208       | 0.0037 | No |
| 588 | Cramp11       | 0.0037 | No |
| 589 | Traj27        | 0.0037 | No |
| 590 | Tuba4a        | 0.0036 | No |
| 591 | Igkv8-24      | 0.0036 | No |
| 592 | Arhgap30      | 0.0036 | No |
| 593 | Gm42596       | 0.0036 | No |
| 594 | Rnf43         | 0.0036 | No |
| 595 | Snx30         | 0.0036 | No |

|     |               |        |    |
|-----|---------------|--------|----|
| 596 | Gm12051       | 0.0036 | No |
| 597 | Gm20460       | 0.0036 | No |
| 598 | Gm38131       | 0.0036 | No |
| 599 | Gm16140       | 0.0036 | No |
| 600 | Adra2a        | 0.0036 | No |
| 601 | Gm45025       | 0.0036 | No |
| 602 | Itch          | 0.0036 | No |
| 603 | Casz1         | 0.0035 | No |
| 604 | Spink1        | 0.0035 | No |
| 605 | 2900035J10Rik | 0.0035 | No |
| 606 | Gm14209       | 0.0035 | No |
| 607 | Lrig1         | 0.0035 | No |
| 608 | Trav14-3      | 0.0035 | No |
| 609 | Iglj3         | 0.0035 | No |
| 610 | Ighv1-62-1    | 0.0035 | No |
| 611 | 2010003K11Rik | 0.0035 | No |
| 612 | Dnajb1        | 0.0035 | No |
| 613 | Olf1576       | 0.0035 | No |
| 614 | Spsb2         | 0.0035 | No |
| 615 | L1td1         | 0.0034 | No |
| 616 | Rin3          | 0.0034 | No |
| 617 | Per2          | 0.0034 | No |
| 618 | Gm23892       | 0.0034 | No |
| 619 | Dnajb2        | 0.0034 | No |
| 620 | Gm38215       | 0.0034 | No |
| 621 | Cetn1         | 0.0034 | No |
| 622 | Iglv2         | 0.0034 | No |
| 623 | Apoa4         | 0.0034 | No |
| 624 | Rnf130        | 0.0034 | No |
| 625 | RP23-106I21.6 | 0.0034 | No |
| 626 | Trbj2-3       | 0.0034 | No |
| 627 | Gm37202       | 0.0034 | No |
| 628 | Zfp352        | 0.0034 | No |
| 629 | RP24-173L14.4 | 0.0033 | No |
| 630 | 2310016G11Rik | 0.0033 | No |
| 631 | Gm25355       | 0.0033 | No |
| 632 | Mir496b       | 0.0033 | No |
| 633 | Icos          | 0.0033 | No |
| 634 | Gm9577        | 0.0033 | No |
| 635 | Cited4        | 0.0033 | No |
| 636 | Dck           | 0.0033 | No |
| 637 | Kynu          | 0.0033 | No |
| 638 | Gm43374       | 0.0033 | No |
| 639 | Gm15743       | 0.0032 | No |
| 640 | Lpcat2        | 0.0032 | No |
| 641 | Kcnn1         | 0.0032 | No |

|     |               |        |    |
|-----|---------------|--------|----|
| 642 | Gm13490       | 0.0032 | No |
| 643 | Gm15527       | 0.0032 | No |
| 644 | Gm27470       | 0.0032 | No |
| 645 | Cnrip1        | 0.0032 | No |
| 646 | Gm22779       | 0.0032 | No |
| 647 | Ppp1r2-ps3    | 0.0032 | No |
| 648 | 1700063A18Rik | 0.0032 | No |
| 649 | Igkv1-117     | 0.0031 | No |
| 650 | Dnaja1        | 0.0031 | No |
| 651 | Mir6361       | 0.0031 | No |
| 652 | Trbv24        | 0.0031 | No |
| 653 | Gm24519       | 0.0031 | No |
| 654 | Gm22934       | 0.0031 | No |
| 655 | Fam170b       | 0.0031 | No |
| 656 | Ighv1-61      | 0.0031 | No |
| 657 | Gm15660       | 0.0031 | No |
| 658 | Gm24438       | 0.0031 | No |
| 659 | RP23-198D4.3  | 0.0030 | No |
| 660 | Taar3         | 0.0030 | No |
| 661 | H2-M10.5-ps1  | 0.0030 | No |
| 662 | Mc3r          | 0.0030 | No |
| 663 | Syk           | 0.0030 | No |
| 664 | Pear1         | 0.0030 | No |
| 665 | Klra7         | 0.0030 | No |
| 666 | Gm17055       | 0.0030 | No |
| 667 | Gm44544       | 0.0030 | No |
| 668 | Serpinb7      | 0.0030 | No |
| 669 | Gm10478       | 0.0030 | No |
| 670 | Tmem37        | 0.0030 | No |
| 671 | Chst2         | 0.0030 | No |
| 672 | Gm14264       | 0.0030 | No |
| 673 | Gm10535       | 0.0030 | No |
| 674 | 9230105E05Rik | 0.0030 | No |
| 675 | Gm45639       | 0.0030 | No |
| 676 | Gm22828       | 0.0030 | No |
| 677 | Milt3         | 0.0030 | No |
| 678 | Prr51         | 0.0030 | No |
| 679 | Gm13271       | 0.0030 | No |
| 680 | Wbscr17       | 0.0030 | No |
| 681 | Olf110        | 0.0030 | No |
| 682 | Olf1232       | 0.0030 | No |
| 683 | Gm10608       | 0.0030 | No |
| 684 | Mageb7-ps     | 0.0029 | No |
| 685 | Hes7          | 0.0029 | No |
| 686 | Pga5          | 0.0029 | No |
| 687 | Bcar3         | 0.0029 | No |

|     |               |        |    |
|-----|---------------|--------|----|
| 688 | 11-Sep        | 0.0029 | No |
| 689 | Gm15083       | 0.0029 | No |
| 690 | Fam13c        | 0.0029 | No |
| 691 | Gm38238       | 0.0029 | No |
| 692 | 1700027J19Rik | 0.0029 | No |
| 693 | Olfr1039      | 0.0029 | No |
| 694 | Gm6334        | 0.0029 | No |
| 695 | Iqch          | 0.0029 | No |
| 696 | Mir6389       | 0.0029 | No |
| 697 | Slc51b        | 0.0029 | No |
| 698 | Hdac7         | 0.0029 | No |
| 699 | Gm16224       | 0.0029 | No |
| 700 | Fabp2         | 0.0029 | No |
| 701 | Rhbdd1        | 0.0029 | No |
| 702 | RP24-298N7.11 | 0.0029 | No |
| 703 | Gm44540       | 0.0029 | No |
| 704 | Gm26262       | 0.0028 | No |
| 705 | Gm27457       | 0.0028 | No |
| 706 | Spock2        | 0.0028 | No |
| 707 | Gm45272       | 0.0028 | No |
| 708 | Gipc2         | 0.0028 | No |
| 709 | Gm12689       | 0.0028 | No |
| 710 | Nckap1        | 0.0028 | No |
| 711 | Gm42639       | 0.0028 | No |
| 712 | Traj9         | 0.0028 | No |
| 713 | Gm37125       | 0.0028 | No |
| 714 | Vmn1r220      | 0.0028 | No |
| 715 | Foxr2         | 0.0028 | No |
| 716 | Sdc1          | 0.0028 | No |
| 717 | Gm14415       | 0.0028 | No |
| 718 | Lyzl4         | 0.0028 | No |
| 719 | Umad1         | 0.0028 | No |
| 720 | Gm43451       | 0.0028 | No |
| 721 | Gm26411       | 0.0028 | No |
| 722 | 1700065J18Rik | 0.0028 | No |
| 723 | Iglj1         | 0.0027 | No |
| 724 | Gm16702       | 0.0027 | No |
| 725 | Igkj2         | 0.0027 | No |
| 726 | Gm20690       | 0.0027 | No |
| 727 | Lrrc18        | 0.0027 | No |
| 728 | Hnrnp1l       | 0.0027 | No |
| 729 | Trav8-2       | 0.0027 | No |
| 730 | Ighv5-16      | 0.0027 | No |
| 731 | Cpb1          | 0.0027 | No |
| 732 | Arxes2        | 0.0027 | No |
| 733 | Gm26316       | 0.0027 | No |



|     |               |        |    |
|-----|---------------|--------|----|
| 734 | Cyb5r3        | 0.0027 | No |
| 735 | Scgb2b25-ps   | 0.0027 | No |
| 736 | Dalir         | 0.0027 | No |
| 737 | Gm11712       | 0.0027 | No |
| 738 | Gm15622       | 0.0027 | No |
| 739 | Gm9375        | 0.0027 | No |
| 740 | Colgalt2      | 0.0027 | No |
| 741 | Mrps18c       | 0.0027 | No |
| 742 | Gm14100       | 0.0027 | No |
| 743 | Gm18336       | 0.0027 | No |
| 744 | Mir350        | 0.0027 | No |
| 745 | RP23-228J12.2 | 0.0026 | No |
| 746 | Trbv19        | 0.0026 | No |
| 747 | Ighv3-1       | 0.0026 | No |
| 748 | Ighv1-15      | 0.0026 | No |
| 749 | Gm15323       | 0.0026 | No |
| 750 | Traj35        | 0.0026 | No |
| 751 | Prr23a3       | 0.0026 | No |
| 752 | Gm17677       | 0.0026 | No |
| 753 | RP24-435G18.2 | 0.0026 | No |
| 754 | Gm45349       | 0.0026 | No |
| 755 | Actn1         | 0.0026 | No |
| 756 | Scarf2        | 0.0026 | No |
| 757 | RP23-203D1.2  | 0.0026 | No |
| 758 | R3hdml        | 0.0026 | No |
| 759 | Nat8          | 0.0026 | No |
| 760 | Gm45352       | 0.0026 | No |
| 761 | B020004C17Rik | 0.0026 | No |
| 762 | Kcnip3        | 0.0026 | No |
| 763 | Ankrd35       | 0.0026 | No |
| 764 | Gm28307       | 0.0026 | No |
| 765 | Ighv1-63      | 0.0026 | No |
| 766 | Gm27458       | 0.0025 | No |
| 767 | Akna          | 0.0025 | No |
| 768 | Hba-a2        | 0.0025 | No |
| 769 | Spib          | 0.0025 | No |
| 770 | Vmn1r184      | 0.0025 | No |
| 771 | Gm45230       | 0.0025 | No |
| 772 | Bpi           | 0.0025 | No |
| 773 | Gm24763       | 0.0025 | No |
| 774 | Mir8117       | 0.0025 | No |
| 775 | Fam151a       | 0.0025 | No |
| 776 | Gp1bb         | 0.0025 | No |
| 777 | Ighv5-17      | 0.0025 | No |
| 778 | Serpinb3c     | 0.0025 | No |
| 779 | Gm26173       | 0.0025 | No |

|     |               |        |    |
|-----|---------------|--------|----|
| 780 | Gm17780       | 0.0025 | No |
| 781 | Gm18641       | 0.0025 | No |
| 782 | 9230020A06Rik | 0.0025 | No |
| 783 | Ighv3-6       | 0.0025 | No |
| 784 | Srxn1         | 0.0025 | No |
| 785 | Ighv1-51      | 0.0025 | No |
| 786 | Gm11695       | 0.0025 | No |
| 787 | B020017C02Rik | 0.0025 | No |
| 788 | Gab2          | 0.0025 | No |
| 789 | Tcrg-V6       | 0.0025 | No |
| 790 | C230062I16Rik | 0.0025 | No |
| 791 | BC064078      | 0.0025 | No |
| 792 | Igkv12-67     | 0.0025 | No |
| 793 | Gm45284       | 0.0025 | No |
| 794 | Gm18692       | 0.0024 | No |
| 795 | Gm9357        | 0.0024 | No |
| 796 | Apobr         | 0.0024 | No |
| 797 | Olfir640      | 0.0024 | No |
| 798 | Gm25104       | 0.0024 | No |
| 799 | Gm9994        | 0.0024 | No |
| 800 | P2ry1         | 0.0024 | No |
| 801 | Cerk          | 0.0024 | No |
| 802 | Csf2          | 0.0024 | No |
| 803 | Traj50        | 0.0024 | No |
| 804 | Gm45321       | 0.0024 | No |
| 805 | Ly6k          | 0.0024 | No |
| 806 | Vsig8         | 0.0024 | No |
| 807 | Vmn2r-ps21    | 0.0024 | No |
| 808 | Hist1h2al     | 0.0024 | No |
| 809 | Gm7919        | 0.0024 | No |
| 810 | Gm30517       | 0.0024 | No |
| 811 | Gm43569       | 0.0024 | No |
| 812 | Olfir513      | 0.0024 | No |
| 813 | Gm17472       | 0.0024 | No |
| 814 | Clec1b        | 0.0024 | No |
| 815 | Olfir793-ps1  | 0.0024 | No |
| 816 | Gm25440       | 0.0024 | No |
| 817 | Gm13070       | 0.0024 | No |
| 818 | Gm15445       | 0.0024 | No |
| 819 | Soat1         | 0.0024 | No |
| 820 | RP23-146A22.3 | 0.0024 | No |
| 821 | Olfir638      | 0.0024 | No |
| 822 | Fgd2          | 0.0024 | No |
| 823 | Gm17956       | 0.0023 | No |
| 824 | Gm42931       | 0.0023 | No |
| 825 | Adk           | 0.0023 | No |

|     |               |        |    |
|-----|---------------|--------|----|
| 826 | B020031M17Rik | 0.0023 | No |
| 827 | Gm11866       | 0.0023 | No |
| 828 | Hpcall        | 0.0023 | No |
| 829 | Ighv1-55      | 0.0023 | No |
| 830 | Gm18421       | 0.0023 | No |
| 831 | 4930405G09Rik | 0.0023 | No |
| 832 | Gm19125       | 0.0023 | No |
| 833 | Hsd3b7        | 0.0023 | No |
| 834 | Drd3          | 0.0023 | No |
| 835 | Gm11551       | 0.0023 | No |
| 836 | Npas3         | 0.0023 | No |
| 837 | Gsta3         | 0.0023 | No |
| 838 | Hs3st1        | 0.0023 | No |
| 839 | Olfr1152      | 0.0023 | No |
| 840 | Gm15650       | 0.0023 | No |
| 841 | Tfap2c        | 0.0023 | No |
| 842 | Rad51ap2      | 0.0023 | No |
| 843 | Ms4a6b        | 0.0023 | No |
| 844 | Gm45131       | 0.0023 | No |
| 845 | Gm16270       | 0.0023 | No |
| 846 | 1700017L05Rik | 0.0023 | No |
| 847 | Olfr1209      | 0.0023 | No |
| 848 | Lynx1         | 0.0023 | No |
| 849 | Gm13187       | 0.0022 | No |
| 850 | Mthfd2        | 0.0022 | No |
| 851 | Tle3          | 0.0022 | No |
| 852 | Txk           | 0.0022 | No |
| 853 | 4930488B22Rik | 0.0022 | No |
| 854 | 5730508B09Rik | 0.0022 | No |
| 855 | Gm45138       | 0.0022 | No |
| 856 | Fbll1         | 0.0022 | No |
| 857 | Gm13928       | 0.0022 | No |
| 858 | Gm27208       | 0.0022 | No |
| 859 | Gm43113       | 0.0022 | No |
| 860 | 1700012A03Rik | 0.0022 | No |
| 861 | Olfr48        | 0.0022 | No |
| 862 | Vmn2r-ps84    | 0.0022 | No |
| 863 | Gm44177       | 0.0022 | No |
| 864 | Gm11861       | 0.0022 | No |
| 865 | Gm37590       | 0.0022 | No |
| 866 | Alpi          | 0.0022 | No |
| 867 | Insm1         | 0.0022 | No |
| 868 | Mag           | 0.0022 | No |
| 869 | Gm9884        | 0.0022 | No |
| 870 | Gm19140       | 0.0022 | No |
| 871 | Olfr1375      | 0.0022 | No |

|     |               |        |    |
|-----|---------------|--------|----|
| 872 | Arhgap18      | 0.0022 | No |
| 873 | Klri2         | 0.0022 | No |
| 874 | Sdc2          | 0.0022 | No |
| 875 | Ighv9-1       | 0.0022 | No |
| 876 | Taok2         | 0.0021 | No |
| 877 | Gm45194       | 0.0021 | No |
| 878 | Gm43291       | 0.0021 | No |
| 879 | Trbv31        | 0.0021 | No |
| 880 | Zp1           | 0.0021 | No |
| 881 | Edem1         | 0.0021 | No |
| 882 | Rnf19a        | 0.0021 | No |
| 883 | Sqstm1        | 0.0021 | No |
| 884 | Zbtb16        | 0.0021 | No |
| 885 | Chd4          | 0.0021 | No |
| 886 | Traj11        | 0.0021 | No |
| 887 | Igkv6-15      | 0.0021 | No |
| 888 | Etv1          | 0.0021 | No |
| 889 | RP23-60O19.4  | 0.0021 | No |
| 890 | Gm43303       | 0.0021 | No |
| 891 | Gm14581       | 0.0021 | No |
| 892 | Mup-ps1       | 0.0021 | No |
| 893 | Gm13722       | 0.0021 | No |
| 894 | RP24-233B16.2 | 0.0021 | No |
| 895 | Gm22420       | 0.0021 | No |
| 896 | Pkia          | 0.0021 | No |
| 897 | Slc15a4       | 0.0021 | No |
| 898 | 4933401J01Rik | 0.0021 | No |
| 899 | Gm23014       | 0.0021 | No |
| 900 | RP23-351O20.1 | 0.0021 | No |
| 901 | Iglc2         | 0.0021 | No |
| 902 | RP23-463P4.3  | 0.0021 | No |
| 903 | Glod5         | 0.0021 | No |
| 904 | Camk2b        | 0.0021 | No |
| 905 | Gm29388       | 0.0021 | No |
| 906 | Traj40        | 0.0021 | No |
| 907 | Chordc1       | 0.0021 | No |
| 908 | Adm           | 0.0021 | No |
| 909 | 1700092E19Rik | 0.0021 | No |
| 910 | Pak1ip1       | 0.0021 | No |
| 911 | Lrig3         | 0.0021 | No |
| 912 | Gm45237       | 0.0021 | No |
| 913 | Gm23760       | 0.0021 | No |
| 914 | Gm10373       | 0.0020 | No |
| 915 | Gm11938       | 0.0020 | No |
| 916 | Cgrrf1        | 0.0020 | No |
| 917 | Arhgef5       | 0.0020 | No |

|     |               |        |    |
|-----|---------------|--------|----|
| 918 | RP23-92N3.1   | 0.0020 | No |
| 919 | Wfikkn2       | 0.0020 | No |
| 920 | Lrfn4         | 0.0020 | No |
| 921 | Mir669l       | 0.0020 | No |
| 922 | F630040K05Rik | 0.0020 | No |
| 923 | Rab34         | 0.0020 | No |
| 924 | Fpr2          | 0.0020 | No |
| 925 | 4933417E11Rik | 0.0020 | No |
| 926 | Gm28622       | 0.0020 | No |
| 927 | Kdm2a         | 0.0020 | No |
| 928 | Gm43223       | 0.0020 | No |
| 929 | Olfr1042      | 0.0020 | No |
| 930 | Gm43732       | 0.0020 | No |
| 931 | Gm24467       | 0.0020 | No |
| 932 | Spp1          | 0.0020 | No |
| 933 | Gm7499        | 0.0020 | No |
| 934 | Gtf2ird1      | 0.0020 | No |
| 935 | Mmgt2         | 0.0020 | No |
| 936 | Gm22037       | 0.0020 | No |
| 937 | Traj46        | 0.0020 | No |
| 938 | RP23-377C12.2 | 0.0020 | No |
| 939 | Gm25861       | 0.0020 | No |
| 940 | Igkv9-129     | 0.0020 | No |
| 941 | Vmn2r55       | 0.0020 | No |
| 942 | Tnni2         | 0.0020 | No |
| 943 | Gm38321       | 0.0020 | No |
| 944 | AY761184      | 0.0020 | No |
| 945 | Fpr-rs3       | 0.0020 | No |
| 946 | Lrrc75aos1    | 0.0020 | No |
| 947 | Gm42816       | 0.0020 | No |
| 948 | Rps6ka3       | 0.0019 | No |
| 949 | Akap12        | 0.0019 | No |
| 950 | Gm15286       | 0.0019 | No |
| 951 | Gm11417       | 0.0019 | No |
| 952 | Chkb          | 0.0019 | No |
| 953 | Fam83a        | 0.0019 | No |
| 954 | Gm22555       | 0.0019 | No |
| 955 | Trbv13-1      | 0.0019 | No |
| 956 | Gm43554       | 0.0019 | No |
| 957 | P3h2          | 0.0019 | No |
| 958 | Gm1833        | 0.0019 | No |
| 959 | Gm25910       | 0.0019 | No |
| 960 | Gm37591       | 0.0019 | No |
| 961 | Slc22a19      | 0.0019 | No |
| 962 | Rnf128        | 0.0019 | No |
| 963 | Gm15984       | 0.0019 | No |

|      |               |        |    |
|------|---------------|--------|----|
| 964  | Col28a1       | 0.0019 | No |
| 965  | RP24-282C4.11 | 0.0019 | No |
| 966  | Gm28883       | 0.0019 | No |
| 967  | Gm28106       | 0.0019 | No |
| 968  | 1700019M22Rik | 0.0019 | No |
| 969  | Wdfy4         | 0.0019 | No |
| 970  | Aurkc         | 0.0019 | No |
| 971  | Ighv5-4       | 0.0019 | No |
| 972  | Gjb2          | 0.0019 | No |
| 973  | Nr4a3         | 0.0019 | No |
| 974  | Ighv14-3      | 0.0019 | No |
| 975  | Gm13183       | 0.0019 | No |
| 976  | Bhlha9        | 0.0019 | No |
| 977  | Plekho2       | 0.0019 | No |
| 978  | Gm28866       | 0.0018 | No |
| 979  | Gm44725       | 0.0018 | No |
| 980  | Spata13       | 0.0018 | No |
| 981  | Gm18430       | 0.0018 | No |
| 982  | Olf2          | 0.0018 | No |
| 983  | Gm29664       | 0.0018 | No |
| 984  | Gm26458       | 0.0018 | No |
| 985  | Gm45569       | 0.0018 | No |
| 986  | Gm15402       | 0.0018 | No |
| 987  | Gm12377       | 0.0018 | No |
| 988  | Gm23903       | 0.0018 | No |
| 989  | Gm6309        | 0.0018 | No |
| 990  | Erp29         | 0.0018 | No |
| 991  | Gm37438       | 0.0018 | No |
| 992  | Erich6b       | 0.0018 | No |
| 993  | Gm29183       | 0.0018 | No |
| 994  | Olf288        | 0.0018 | No |
| 995  | Gm42947       | 0.0018 | No |
| 996  | Gm37670       | 0.0018 | No |
| 997  | Gm12819       | 0.0018 | No |
| 998  | Gm24643       | 0.0018 | No |
| 999  | Pld4          | 0.0018 | No |
| 1000 | Mill1         | 0.0018 | No |
| 1001 | Ancy6         | 0.0018 | No |
| 1002 | Gm44767       | 0.0018 | No |
| 1003 | Gm12349       | 0.0018 | No |
| 1004 | RP23-8D10.1   | 0.0018 | No |
| 1005 | Gm8969        | 0.0018 | No |
| 1006 | Igkj5         | 0.0018 | No |
| 1007 | Sh2d1b1       | 0.0018 | No |
| 1008 | Gm22513       | 0.0018 | No |
| 1009 | Olf209        | 0.0018 | No |

|      |               |        |    |
|------|---------------|--------|----|
| 1010 | Prap1         | 0.0018 | No |
| 1011 | Gm42706       | 0.0018 | No |
| 1012 | Gm23123       | 0.0018 | No |
| 1013 | Gm15961       | 0.0018 | No |
| 1014 | Gm13053       | 0.0018 | No |
| 1015 | Gm43241       | 0.0018 | No |
| 1016 | Gm25706       | 0.0017 | No |
| 1017 | Gm16123       | 0.0017 | No |
| 1018 | Gm6606        | 0.0017 | No |
| 1019 | Ighv1-73      | 0.0017 | No |
| 1020 | Myh15         | 0.0017 | No |
| 1021 | Tmem55b       | 0.0017 | No |
| 1022 | Phlda2        | 0.0017 | No |
| 1023 | RP23-115O21.9 | 0.0017 | No |
| 1024 | Olf60         | 0.0017 | No |
| 1025 | Orai3         | 0.0017 | No |
| 1026 | Gm45626       | 0.0017 | No |
| 1027 | Igkv1-110     | 0.0017 | No |
| 1028 | Gm37911       | 0.0017 | No |
| 1029 | Gm22636       | 0.0017 | No |
| 1030 | Zp3           | 0.0017 | No |
| 1031 | Gm22029       | 0.0017 | No |
| 1032 | Mir7680       | 0.0017 | No |
| 1033 | Esp1          | 0.0017 | No |
| 1034 | Mrgprb4       | 0.0017 | No |
| 1035 | Frmd8         | 0.0017 | No |
| 1036 | Gm42875       | 0.0017 | No |
| 1037 | Gm16141       | 0.0017 | No |
| 1038 | Gm44597       | 0.0017 | No |
| 1039 | Acmsd         | 0.0017 | No |
| 1040 | Rps4l-ps      | 0.0017 | No |
| 1041 | Gm43261       | 0.0017 | No |
| 1042 | Cln3          | 0.0017 | No |
| 1043 | Gm44888       | 0.0017 | No |
| 1044 | Ppargc1a      | 0.0017 | No |
| 1045 | Gm24260       | 0.0017 | No |
| 1046 | 6430548M08Rik | 0.0017 | No |
| 1047 | Olf801        | 0.0017 | No |
| 1048 | Cd247         | 0.0017 | No |
| 1049 | Il12b         | 0.0017 | No |
| 1050 | Gm36927       | 0.0017 | No |
| 1051 | Rps12-ps16    | 0.0017 | No |
| 1052 | Gm11229       | 0.0017 | No |
| 1053 | Gm38219       | 0.0017 | No |
| 1054 | Arhgap10      | 0.0017 | No |
| 1055 | Traj34        | 0.0017 | No |

|      |               |        |    |
|------|---------------|--------|----|
| 1056 | 1700018B24Rik | 0.0017 | No |
| 1057 | Il13          | 0.0017 | No |
| 1058 | Gm37329       | 0.0017 | No |
| 1059 | Fabp7         | 0.0017 | No |
| 1060 | Gm5089        | 0.0017 | No |
| 1061 | Olfir693      | 0.0017 | No |
| 1062 | RP24-221A9.1  | 0.0017 | No |
| 1063 | Gm43264       | 0.0017 | No |
| 1064 | Akp3          | 0.0017 | No |
| 1065 | Gm27753       | 0.0017 | No |
| 1066 | 1810018F18Rik | 0.0017 | No |
| 1067 | Ighv1-54      | 0.0017 | No |
| 1068 | Gm9839        | 0.0016 | No |
| 1069 | Mir7656       | 0.0016 | No |
| 1070 | 1700112D23Rik | 0.0016 | No |
| 1071 | Gm23510       | 0.0016 | No |
| 1072 | RP24-361K14.1 | 0.0016 | No |
| 1073 | Ccl17         | 0.0016 | No |
| 1074 | Snx9          | 0.0016 | No |
| 1075 | Nkx6-2        | 0.0016 | No |
| 1076 | Krt15         | 0.0016 | No |
| 1077 | Gm18444       | 0.0016 | No |
| 1078 | Gm43734       | 0.0016 | No |
| 1079 | Gm16087       | 0.0016 | No |
| 1080 | Traj49        | 0.0016 | No |
| 1081 | Obfc1         | 0.0016 | No |
| 1082 | Mir1969       | 0.0016 | No |
| 1083 | Gm25933       | 0.0016 | No |
| 1084 | Hk1           | 0.0016 | No |
| 1085 | Gm12993       | 0.0016 | No |
| 1086 | Gm12798       | 0.0016 | No |
| 1087 | Gm45340       | 0.0016 | No |
| 1088 | Arhgef10      | 0.0016 | No |
| 1089 | Gm9908        | 0.0016 | No |
| 1090 | Gm28773       | 0.0016 | No |
| 1091 | Gm23466       | 0.0016 | No |
| 1092 | Igkv11-125    | 0.0016 | No |
| 1093 | C3            | 0.0016 | No |
| 1094 | Gm3527        | 0.0016 | No |
| 1095 | Mup7          | 0.0016 | No |
| 1096 | Gm18427       | 0.0016 | No |
| 1097 | Galnt12       | 0.0016 | No |
| 1098 | Wbp1          | 0.0016 | No |
| 1099 | Gm14225       | 0.0016 | No |
| 1100 | Igkv12-38     | 0.0016 | No |
| 1101 | Gm37047       | 0.0016 | No |



|      |               |        |    |
|------|---------------|--------|----|
| 1102 | Gm45238       | 0.0016 | No |
| 1103 | AC109138.2    | 0.0016 | No |
| 1104 | RP23-410O11.1 | 0.0016 | No |
| 1105 | Traj44        | 0.0016 | No |
| 1106 | Gm37428       | 0.0016 | No |
| 1107 | Gm44511       | 0.0016 | No |
| 1108 | Klk6          | 0.0016 | No |
| 1109 | Olfir917      | 0.0016 | No |
| 1110 | Gm5409        | 0.0016 | No |
| 1111 | Gm31401       | 0.0016 | No |
| 1112 | Rpl14         | 0.0016 | No |
| 1113 | Igkv6-23      | 0.0016 | No |
| 1114 | Gm45395       | 0.0016 | No |
| 1115 | BB218582      | 0.0016 | No |
| 1116 | Tmem200a      | 0.0016 | No |
| 1117 | Ubl4b         | 0.0016 | No |
| 1118 | Gm5916        | 0.0016 | No |
| 1119 | Gm13720       | 0.0016 | No |
| 1120 | Dnaja4        | 0.0016 | No |
| 1121 | Dnase1l2      | 0.0016 | No |
| 1122 | Extl1         | 0.0016 | No |
| 1123 | Mir423        | 0.0016 | No |
| 1124 | Gm22798       | 0.0016 | No |
| 1125 | Ighv1-68      | 0.0016 | No |
| 1126 | 1700007K13Rik | 0.0016 | No |
| 1127 | Gm4862        | 0.0016 | No |
| 1128 | Gm11639       | 0.0016 | No |
| 1129 | Gm45166       | 0.0016 | No |
| 1130 | Gm14852       | 0.0016 | No |
| 1131 | G0s2          | 0.0015 | No |
| 1132 | Gm25922       | 0.0015 | No |
| 1133 | Rhbdl2        | 0.0015 | No |
| 1134 | Gm13661       | 0.0015 | No |
| 1135 | Gcnt4         | 0.0015 | No |
| 1136 | Abi3bp        | 0.0015 | No |
| 1137 | Clic3         | 0.0015 | No |
| 1138 | Krt24         | 0.0015 | No |
| 1139 | 4933427I04Rik | 0.0015 | No |
| 1140 | Gm28139       | 0.0015 | No |
| 1141 | Ighv8-7       | 0.0015 | No |
| 1142 | Gm45370       | 0.0015 | No |
| 1143 | Sobp          | 0.0015 | No |
| 1144 | Ccdc54        | 0.0015 | No |
| 1145 | 4930445B16Rik | 0.0015 | No |
| 1146 | Gm24280       | 0.0015 | No |
| 1147 | 1700007P06Rik | 0.0015 | No |

|      |               |        |    |
|------|---------------|--------|----|
| 1148 | Gm11699       | 0.0015 | No |
| 1149 | Gm4845        | 0.0015 | No |
| 1150 | Phactr3       | 0.0015 | No |
| 1151 | Bre           | 0.0015 | No |
| 1152 | Ly6d          | 0.0015 | No |
| 1153 | Ddx46         | 0.0015 | No |
| 1154 | Tesc          | 0.0015 | No |
| 1155 | Gm25682       | 0.0015 | No |
| 1156 | Dctn1         | 0.0015 | No |
| 1157 | 9230112E08Rik | 0.0015 | No |
| 1158 | Gm22650       | 0.0015 | No |
| 1159 | Gm17183       | 0.0015 | No |
| 1160 | Mir6241       | 0.0015 | No |
| 1161 | Exosc8        | 0.0015 | No |
| 1162 | Gm10764       | 0.0015 | No |
| 1163 | Scly          | 0.0015 | No |
| 1164 | Lgals2        | 0.0015 | No |
| 1165 | RP23-311C13.3 | 0.0015 | No |
| 1166 | Mir128-2      | 0.0015 | No |
| 1167 | Gm22956       | 0.0015 | No |
| 1168 | 11-Mar        | 0.0015 | No |
| 1169 | Gm23793       | 0.0015 | No |
| 1170 | Gm13975       | 0.0015 | No |
| 1171 | Trpv2         | 0.0015 | No |
| 1172 | Meox1         | 0.0015 | No |
| 1173 | Vmn2r48       | 0.0015 | No |
| 1174 | Gm44925       | 0.0015 | No |
| 1175 | Gm27245       | 0.0015 | No |
| 1176 | Gnb5          | 0.0015 | No |
| 1177 | Ighv1-5       | 0.0015 | No |
| 1178 | RP23-203D1.5  | 0.0015 | No |
| 1179 | Ptprtos       | 0.0015 | No |
| 1180 | Gm5001        | 0.0015 | No |
| 1181 | PVRIG         | 0.0015 | No |
| 1182 | Gm14210       | 0.0014 | No |
| 1183 | Igkv11-114    | 0.0014 | No |
| 1184 | Ipcef1        | 0.0014 | No |
| 1185 | A330070K13Rik | 0.0014 | No |
| 1186 | RP23-463P4.1  | 0.0014 | No |
| 1187 | Trem3         | 0.0014 | No |
| 1188 | Ifi203-ps     | 0.0014 | No |
| 1189 | Pbx3          | 0.0014 | No |
| 1190 | 1700121C08Rik | 0.0014 | No |
| 1191 | Hebp2         | 0.0014 | No |
| 1192 | Cldn7         | 0.0014 | No |
| 1193 | Gm45413       | 0.0014 | No |

|      |               |        |    |
|------|---------------|--------|----|
| 1194 | 4921528I07Rik | 0.0014 | No |
| 1195 | Gm12071       | 0.0014 | No |
| 1196 | Gm28077       | 0.0014 | No |
| 1197 | Gm23274       | 0.0014 | No |
| 1198 | Igkv2-109     | 0.0014 | No |
| 1199 | Rps19         | 0.0014 | No |
| 1200 | Anks6         | 0.0014 | No |
| 1201 | Gm8774        | 0.0014 | No |
| 1202 | Svil          | 0.0014 | No |
| 1203 | Gm14208       | 0.0014 | No |
| 1204 | 4933440M02Rik | 0.0014 | No |
| 1205 | 2810404M03Rik | 0.0014 | No |
| 1206 | Gm13596       | 0.0014 | No |
| 1207 | Carlr         | 0.0014 | No |
| 1208 | B3gnt8        | 0.0014 | No |
| 1209 | Cybb          | 0.0014 | No |
| 1210 | Gm19089       | 0.0014 | No |
| 1211 | Fgf18         | 0.0014 | No |
| 1212 | A230028O05Rik | 0.0014 | No |
| 1213 | Gm29019       | 0.0014 | No |
| 1214 | Gm16556       | 0.0014 | No |
| 1215 | Prl3d3        | 0.0014 | No |
| 1216 | Gm9855        | 0.0014 | No |
| 1217 | Sppl2b        | 0.0014 | No |
| 1218 | Vmn1r46       | 0.0014 | No |
| 1219 | Adgrg5        | 0.0014 | No |
| 1220 | H2-Ob         | 0.0014 | No |
| 1221 | Tmem119       | 0.0014 | No |
| 1222 | Nfil3         | 0.0014 | No |
| 1223 | Gm37086       | 0.0014 | No |
| 1224 | Gm10238       | 0.0014 | No |
| 1225 | Gm38007       | 0.0014 | No |
| 1226 | Bpifb6        | 0.0014 | No |
| 1227 | Wfdc15a       | 0.0014 | No |
| 1228 | Gm25605       | 0.0014 | No |
| 1229 | RP23-331I13.2 | 0.0014 | No |
| 1230 | Gm43975       | 0.0014 | No |
| 1231 | 4930565D16Rik | 0.0014 | No |
| 1232 | Olf92         | 0.0014 | No |
| 1233 | 1700023C21Rik | 0.0014 | No |
| 1234 | Gm26543       | 0.0014 | No |
| 1235 | Serpina3b     | 0.0014 | No |
| 1236 | Gm17359       | 0.0014 | No |
| 1237 | Cyp2a21-ps    | 0.0014 | No |
| 1238 | Gm42597       | 0.0014 | No |
| 1239 | Gm44244       | 0.0014 | No |

|      |               |        |    |
|------|---------------|--------|----|
| 1240 | Atg16l2       | 0.0014 | No |
| 1241 | Prr22         | 0.0014 | No |
| 1242 | Gm17103       | 0.0014 | No |
| 1243 | Gm45558       | 0.0014 | No |
| 1244 | Gm8705        | 0.0014 | No |
| 1245 | Olfir745      | 0.0014 | No |
| 1246 | DXBay18       | 0.0014 | No |
| 1247 | Trav13-1      | 0.0014 | No |
| 1248 | Caly          | 0.0014 | No |
| 1249 | Serp1         | 0.0014 | No |
| 1250 | Axin2         | 0.0014 | No |
| 1251 | 2310079G19Rik | 0.0014 | No |
| 1252 | Adgre4        | 0.0013 | No |
| 1253 | Gm12682       | 0.0013 | No |
| 1254 | Gm25846       | 0.0013 | No |
| 1255 | Gpc3          | 0.0013 | No |
| 1256 | RP23-361B11.3 | 0.0013 | No |
| 1257 | Gm37736       | 0.0013 | No |
| 1258 | Osbpl5        | 0.0013 | No |
| 1259 | Gm23654       | 0.0013 | No |
| 1260 | Tmbim4        | 0.0013 | No |
| 1261 | Gm13527       | 0.0013 | No |
| 1262 | Olfir469      | 0.0013 | No |
| 1263 | Cd27          | 0.0013 | No |
| 1264 | Ighv2-5       | 0.0013 | No |
| 1265 | Gm17225       | 0.0013 | No |
| 1266 | RP23-116C19.5 | 0.0013 | No |
| 1267 | Khdc1a        | 0.0013 | No |
| 1268 | Tjp2          | 0.0013 | No |
| 1269 | Mir877        | 0.0013 | No |
| 1270 | Vmn1r56       | 0.0013 | No |
| 1271 | Vmn1r-ps59    | 0.0013 | No |
| 1272 | Gm24475       | 0.0013 | No |
| 1273 | Gm15422       | 0.0013 | No |
| 1274 | Rasgef1c      | 0.0013 | No |
| 1275 | Gm25163       | 0.0013 | No |
| 1276 | Igkv18-36     | 0.0013 | No |
| 1277 | Ffar4         | 0.0013 | No |
| 1278 | Gm6541        | 0.0013 | No |
| 1279 | 4921508M14Rik | 0.0013 | No |
| 1280 | Id2           | 0.0013 | No |
| 1281 | Tcaf2         | 0.0013 | No |
| 1282 | RP23-357O17.1 | 0.0013 | No |
| 1283 | Gm18341       | 0.0013 | No |
| 1284 | Ighv1-56      | 0.0013 | No |
| 1285 | Guca2b        | 0.0013 | No |

|      |               |        |    |
|------|---------------|--------|----|
| 1286 | Plcb4         | 0.0013 | No |
| 1287 | 1700111E14Rik | 0.0013 | No |
| 1288 | Tmie          | 0.0013 | No |
| 1289 | Gm26802       | 0.0013 | No |
| 1290 | Mark4-ps      | 0.0013 | No |
| 1291 | Traj36        | 0.0013 | No |
| 1292 | Gm23240       | 0.0013 | No |
| 1293 | Gm45459       | 0.0013 | No |
| 1294 | Vmn2r45       | 0.0013 | No |
| 1295 | 4930503E14Rik | 0.0013 | No |
| 1296 | Olfir508      | 0.0013 | No |
| 1297 | Gm22886       | 0.0013 | No |
| 1298 | Jag1          | 0.0013 | No |
| 1299 | RP23-366E4.6  | 0.0013 | No |
| 1300 | Sema6d        | 0.0013 | No |
| 1301 | Chst1         | 0.0013 | No |
| 1302 | Ghrh          | 0.0013 | No |
| 1303 | RP23-366E4.10 | 0.0013 | No |
| 1304 | Mir7012       | 0.0013 | No |
| 1305 | Gm37811       | 0.0013 | No |
| 1306 | Carmn         | 0.0013 | No |
| 1307 | Fcrl1         | 0.0013 | No |
| 1308 | Gm9347        | 0.0013 | No |
| 1309 | Olfir547      | 0.0013 | No |
| 1310 | St3gal5       | 0.0013 | No |
| 1311 | Ggh           | 0.0013 | No |
| 1312 | Fyb           | 0.0013 | No |
| 1313 | Ctsh          | 0.0013 | No |
| 1314 | Defb34        | 0.0013 | No |
| 1315 | Gm829         | 0.0013 | No |
| 1316 | Gm23777       | 0.0013 | No |
| 1317 | Ighv1-33      | 0.0013 | No |
| 1318 | Gm25574       | 0.0013 | No |
| 1319 | Gm43111       | 0.0013 | No |
| 1320 | Klrb1f        | 0.0013 | No |
| 1321 | Gm45373       | 0.0013 | No |
| 1322 | Gm20223       | 0.0013 | No |
| 1323 | Fgg           | 0.0013 | No |
| 1324 | Gm44099       | 0.0013 | No |
| 1325 | 2410080I02Rik | 0.0013 | No |
| 1326 | Il12a         | 0.0013 | No |
| 1327 | Sit1          | 0.0013 | No |
| 1328 | Gm6366        | 0.0013 | No |
| 1329 | Slc30a2       | 0.0013 | No |
| 1330 | Olfir1323     | 0.0013 | No |
| 1331 | Gm7275        | 0.0013 | No |

|      |               |        |    |
|------|---------------|--------|----|
| 1332 | Gm8104        | 0.0013 | No |
| 1333 | Trgj3         | 0.0013 | No |
| 1334 | Gm38024       | 0.0013 | No |
| 1335 | Slc9a9        | 0.0013 | No |
| 1336 | Gm43888       | 0.0013 | No |
| 1337 | RP23-442M18.6 | 0.0013 | No |
| 1338 | B430219N15Rik | 0.0013 | No |
| 1339 | Sergef        | 0.0012 | No |
| 1340 | Gm5468        | 0.0012 | No |
| 1341 | Gm23622       | 0.0012 | No |
| 1342 | Gm43011       | 0.0012 | No |
| 1343 | Limk1         | 0.0012 | No |
| 1344 | Traj18        | 0.0012 | No |
| 1345 | Gm11606       | 0.0012 | No |
| 1346 | Il2           | 0.0012 | No |
| 1347 | Traj37        | 0.0012 | No |
| 1348 | Gm17155       | 0.0012 | No |
| 1349 | Gm43921       | 0.0012 | No |
| 1350 | Gm12845       | 0.0012 | No |
| 1351 | Kenma1        | 0.0012 | No |
| 1352 | Gm16355       | 0.0012 | No |
| 1353 | Gm4956        | 0.0012 | No |
| 1354 | Gm16271       | 0.0012 | No |
| 1355 | Gm25979       | 0.0012 | No |
| 1356 | Gm6327        | 0.0012 | No |
| 1357 | Olf194        | 0.0012 | No |
| 1358 | Olf1320       | 0.0012 | No |
| 1359 | Gm14617       | 0.0012 | No |
| 1360 | 4930566N20Rik | 0.0012 | No |
| 1361 | Gm6916        | 0.0012 | No |
| 1362 | Mir6931       | 0.0012 | No |
| 1363 | Cabin1        | 0.0012 | No |
| 1364 | Gm7646        | 0.0012 | No |
| 1365 | Mir204        | 0.0012 | No |
| 1366 | Gm25583       | 0.0012 | No |
| 1367 | Gm26306       | 0.0012 | No |
| 1368 | Hook3         | 0.0012 | No |
| 1369 | 4930564D02Rik | 0.0012 | No |
| 1370 | Rnf2          | 0.0012 | No |
| 1371 | Traj33        | 0.0012 | No |
| 1372 | Gm22917       | 0.0012 | No |
| 1373 | Rax           | 0.0012 | No |
| 1374 | Gm8550        | 0.0012 | No |
| 1375 | 4930518I17Rik | 0.0012 | No |
| 1376 | Gm44191       | 0.0012 | No |
| 1377 | Gm29318       | 0.0012 | No |

|      |               |        |    |
|------|---------------|--------|----|
| 1378 | RP23-267J18.5 | 0.0012 | No |
| 1379 | Mir679        | 0.0012 | No |
| 1380 | Gm21477       | 0.0012 | No |
| 1381 | Asgr1         | 0.0012 | No |
| 1382 | Gm43976       | 0.0012 | No |
| 1383 | Mir7027       | 0.0012 | No |
| 1384 | Lrrc17        | 0.0012 | No |
| 1385 | Car2          | 0.0012 | No |
| 1386 | Rnf144a       | 0.0012 | No |
| 1387 | Traj20        | 0.0012 | No |
| 1388 | Olfir803      | 0.0012 | No |
| 1389 | Mc4r          | 0.0012 | No |
| 1390 | Gm5616        | 0.0012 | No |
| 1391 | Krtap19-1     | 0.0012 | No |
| 1392 | Gm38306       | 0.0012 | No |
| 1393 | Gm15526       | 0.0012 | No |
| 1394 | CH25-395E5.3  | 0.0012 | No |
| 1395 | Gm27369       | 0.0012 | No |
| 1396 | Zscan4-ps1    | 0.0012 | No |
| 1397 | Mitd1         | 0.0012 | No |
| 1398 | Ighv7-4       | 0.0012 | No |
| 1399 | Slc14a2       | 0.0012 | No |
| 1400 | Gm43616       | 0.0012 | No |
| 1401 | Gm13372       | 0.0012 | No |
| 1402 | Lipm          | 0.0012 | No |
| 1403 | Olfir1505     | 0.0012 | No |
| 1404 | Mir3079       | 0.0012 | No |
| 1405 | Gm14963       | 0.0012 | No |
| 1406 | RP24-324J2.1  | 0.0012 | No |
| 1407 | 4930461G14Rik | 0.0012 | No |
| 1408 | Gm44197       | 0.0012 | No |
| 1409 | Defa30        | 0.0012 | No |
| 1410 | Gpr68         | 0.0012 | No |
| 1411 | Stfa3         | 0.0012 | No |
| 1412 | 4933436H12Rik | 0.0012 | No |
| 1413 | Gm11961       | 0.0012 | No |
| 1414 | Ighv16-1      | 0.0012 | No |
| 1415 | Duox1         | 0.0012 | No |
| 1416 | Ferd3l        | 0.0012 | No |
| 1417 | Chrne         | 0.0012 | No |
| 1418 | Rbm3          | 0.0012 | No |
| 1419 | Gm16260       | 0.0012 | No |
| 1420 | Gm28645       | 0.0012 | No |
| 1421 | Vmn2r-ps118   | 0.0012 | No |
| 1422 | Myog          | 0.0012 | No |
| 1423 | 1190002N15Rik | 0.0012 | No |

|      |               |        |    |
|------|---------------|--------|----|
| 1424 | Obox3-ps8     | 0.0012 | No |
| 1425 | Yeats4        | 0.0012 | No |
| 1426 | Gm7212        | 0.0012 | No |
| 1427 | Cdh22         | 0.0012 | No |
| 1428 | Gm14448       | 0.0012 | No |
| 1429 | Gm12368       | 0.0012 | No |
| 1430 | Slc6a12       | 0.0012 | No |
| 1431 | 4-Sep         | 0.0012 | No |
| 1432 | Gm44959       | 0.0012 | No |
| 1433 | 1700006H21Rik | 0.0012 | No |
| 1434 | Gm20472       | 0.0012 | No |
| 1435 | A530021J07Rik | 0.0012 | No |
| 1436 | Gm7419        | 0.0012 | No |
| 1437 | 1700123O12Rik | 0.0012 | No |
| 1438 | Gm44862       | 0.0012 | No |
| 1439 | Gm29243       | 0.0012 | No |
| 1440 | 9330121K16Rik | 0.0011 | No |
| 1441 | Gm23882       | 0.0011 | No |
| 1442 | 1700025H01Rik | 0.0011 | No |
| 1443 | Pycr2         | 0.0011 | No |
| 1444 | Gm8848        | 0.0011 | No |
| 1445 | Gm17800       | 0.0011 | No |
| 1446 | Rbm38         | 0.0011 | No |
| 1447 | Fbxo9         | 0.0011 | No |
| 1448 | Ighv1-19      | 0.0011 | No |
| 1449 | Gm27313       | 0.0011 | No |
| 1450 | Sbpl          | 0.0011 | No |
| 1451 | Prima1        | 0.0011 | No |
| 1452 | Gm13210       | 0.0011 | No |
| 1453 | Gm15381       | 0.0011 | No |
| 1454 | Gm37649       | 0.0011 | No |
| 1455 | Gm25579       | 0.0011 | No |
| 1456 | Ly6g5c        | 0.0011 | No |
| 1457 | Srsf1         | 0.0011 | No |
| 1458 | Gm12063       | 0.0011 | No |
| 1459 | 5430421F17Rik | 0.0011 | No |
| 1460 | RP23-354J5.2  | 0.0011 | No |
| 1461 | Tubb6         | 0.0011 | No |
| 1462 | Gm11896       | 0.0011 | No |
| 1463 | Gm15617       | 0.0011 | No |
| 1464 | Tas2r125      | 0.0011 | No |
| 1465 | Gm13775       | 0.0011 | No |
| 1466 | Tdrd9         | 0.0011 | No |
| 1467 | 5430416O09Rik | 0.0011 | No |
| 1468 | Gm45082       | 0.0011 | No |
| 1469 | Gm43478       | 0.0011 | No |



|      |               |        |    |
|------|---------------|--------|----|
| 1470 | Gm42962       | 0.0011 | No |
| 1471 | Fntb          | 0.0011 | No |
| 1472 | Trac          | 0.0011 | No |
| 1473 | 4933415J04Rik | 0.0011 | No |
| 1474 | Gm37022       | 0.0011 | No |
| 1475 | 9230102O04Rik | 0.0011 | No |
| 1476 | Lmod1         | 0.0011 | No |
| 1477 | Spata19       | 0.0011 | No |
| 1478 | 3830422I06Rik | 0.0011 | No |
| 1479 | Dcxr          | 0.0011 | No |
| 1480 | Aebp1         | 0.0011 | No |
| 1481 | Gm37024       | 0.0011 | No |
| 1482 | Crtam         | 0.0011 | No |
| 1483 | Gm28169       | 0.0011 | No |
| 1484 | Gm13273       | 0.0011 | No |
| 1485 | RP24-553O21.3 | 0.0011 | No |
| 1486 | Shmt1         | 0.0011 | No |
| 1487 | Frs3os        | 0.0011 | No |
| 1488 | Acap1         | 0.0011 | No |
| 1489 | RP23-394G23.2 | 0.0011 | No |
| 1490 | Gm9023        | 0.0011 | No |
| 1491 | H2-DMa        | 0.0011 | No |
| 1492 | C130073F10Rik | 0.0011 | No |
| 1493 | Slc43a1       | 0.0011 | No |
| 1494 | Olf204        | 0.0011 | No |
| 1495 | Etf1          | 0.0011 | No |
| 1496 | 4930465I24Rik | 0.0011 | No |
| 1497 | B430203G13Rik | 0.0011 | No |
| 1498 | Gm24896       | 0.0011 | No |
| 1499 | Luzp1         | 0.0011 | No |
| 1500 | Gm27219       | 0.0011 | No |
| 1501 | RP23-184M4.3  | 0.0011 | No |
| 1502 | Gm35453       | 0.0011 | No |
| 1503 | B230323A14Rik | 0.0011 | No |
| 1504 | RP23-69D2.2   | 0.0011 | No |
| 1505 | Platr3        | 0.0011 | No |
| 1506 | Mir5621       | 0.0011 | No |
| 1507 | Gm12006       | 0.0011 | No |
| 1508 | Rapgef4os2    | 0.0011 | No |
| 1509 | Ighv1-19-1    | 0.0011 | No |
| 1510 | Htra3         | 0.0011 | No |
| 1511 | Xkr7          | 0.0011 | No |
| 1512 | Trav9-4       | 0.0011 | No |
| 1513 | Gm17984       | 0.0011 | No |
| 1514 | Gm43892       | 0.0011 | No |
| 1515 | Gm13088       | 0.0011 | No |

|      |               |        |    |
|------|---------------|--------|----|
| 1516 | Gm6630        | 0.0011 | No |
| 1517 | Olf779        | 0.0011 | No |
| 1518 | Stat5a        | 0.0011 | No |
| 1519 | Trav8-1       | 0.0011 | No |
| 1520 | Gm14161       | 0.0011 | No |
| 1521 | Tff3          | 0.0011 | No |
| 1522 | Gm4755        | 0.0011 | No |
| 1523 | 1700015E13Rik | 0.0011 | No |
| 1524 | Gm6077        | 0.0011 | No |
| 1525 | Pard3bos3     | 0.0011 | No |
| 1526 | Gm22763       | 0.0011 | No |
| 1527 | 2700089I24Rik | 0.0011 | No |
| 1528 | Ighv8-10      | 0.0011 | No |
| 1529 | Ssmem1        | 0.0011 | No |
| 1530 | Slc45a3       | 0.0011 | No |
| 1531 | Olf992        | 0.0011 | No |
| 1532 | Gm43812       | 0.0011 | No |
| 1533 | Slc6a16       | 0.0011 | No |
| 1534 | Gm43231       | 0.0011 | No |
| 1535 | 4930513N20Rik | 0.0011 | No |
| 1536 | Pdlim4        | 0.0011 | No |
| 1537 | Uchl1         | 0.0011 | No |
| 1538 | Gm37264       | 0.0011 | No |
| 1539 | Gm15554       | 0.0011 | No |
| 1540 | Cacng1        | 0.0011 | No |
| 1541 | Ces2d-ps      | 0.0011 | No |
| 1542 | Gm15592       | 0.0010 | No |
| 1543 | 9130015G15Rik | 0.0010 | No |
| 1544 | Papolb        | 0.0010 | No |
| 1545 | Apol11a       | 0.0010 | No |
| 1546 | Gm45458       | 0.0010 | No |
| 1547 | Krt39         | 0.0010 | No |
| 1548 | 4930433I11Rik | 0.0010 | No |
| 1549 | Cyp4b1        | 0.0010 | No |
| 1550 | Cav3          | 0.0010 | No |
| 1551 | Gm7694        | 0.0010 | No |
| 1552 | Slpi          | 0.0010 | No |
| 1553 | Gm22865       | 0.0010 | No |
| 1554 | Gm43550       | 0.0010 | No |
| 1555 | 8430437L04Rik | 0.0010 | No |
| 1556 | Ccdc106       | 0.0010 | No |
| 1557 | Dusp13        | 0.0010 | No |
| 1558 | Gm44241       | 0.0010 | No |
| 1559 | Olf726        | 0.0010 | No |
| 1560 | RP23-199N18.2 | 0.0010 | No |
| 1561 | Dlgap4        | 0.0010 | No |

|      |               |        |    |
|------|---------------|--------|----|
| 1562 | D030062O11Rik | 0.0010 | No |
| 1563 | N4bp2         | 0.0010 | No |
| 1564 | Gm24415       | 0.0010 | No |
| 1565 | 1700018G05Rik | 0.0010 | No |
| 1566 | Mrgpra9       | 0.0010 | No |
| 1567 | 4930480K02Rik | 0.0010 | No |
| 1568 | Gm12697       | 0.0010 | No |
| 1569 | Ighv2-9-1     | 0.0010 | No |
| 1570 | Stk39         | 0.0010 | No |
| 1571 | 4933406G16Rik | 0.0010 | No |
| 1572 | Igkv6-17      | 0.0010 | No |
| 1573 | Gm26279       | 0.0010 | No |
| 1574 | 2810030D12Rik | 0.0010 | No |
| 1575 | Gm5114        | 0.0010 | No |
| 1576 | Gm45488       | 0.0010 | No |
| 1577 | Gm38083       | 0.0010 | No |
| 1578 | Gm24313       | 0.0010 | No |
| 1579 | RP23-403G9.8  | 0.0010 | No |
| 1580 | Traj6         | 0.0010 | No |
| 1581 | Gm19761       | 0.0010 | No |
| 1582 | Gm13672       | 0.0010 | No |
| 1583 | Gm42495       | 0.0010 | No |
| 1584 | B3gnt7        | 0.0010 | No |
| 1585 | Gm20461       | 0.0010 | No |
| 1586 | Gm22479       | 0.0010 | No |
| 1587 | Slc7a8        | 0.0010 | No |
| 1588 | H60c          | 0.0010 | No |
| 1589 | Gm37324       | 0.0010 | No |
| 1590 | Traj45        | 0.0010 | No |
| 1591 | Igkv1-88      | 0.0010 | No |
| 1592 | Gm23834       | 0.0010 | No |
| 1593 | Zfp335        | 0.0010 | No |
| 1594 | Gm43431       | 0.0010 | No |
| 1595 | Gm30498       | 0.0010 | No |
| 1596 | Gm14507       | 0.0010 | No |
| 1597 | Pabpc6        | 0.0010 | No |
| 1598 | Gm43058       | 0.0010 | No |
| 1599 | Slc25a53      | 0.0010 | No |
| 1600 | Ctsll3        | 0.0010 | No |
| 1601 | Gm22491       | 0.0010 | No |
| 1602 | Gm43401       | 0.0010 | No |
| 1603 | Kcnq3         | 0.0010 | No |
| 1604 | Gm42514       | 0.0010 | No |
| 1605 | Gm22018       | 0.0010 | No |
| 1606 | Gm45287       | 0.0010 | No |
| 1607 | Gm24957       | 0.0010 | No |

|      |               |        |    |
|------|---------------|--------|----|
| 1608 | Gm14575       | 0.0010 | No |
| 1609 | Plcg2         | 0.0010 | No |
| 1610 | Olfr1347      | 0.0010 | No |
| 1611 | Gm37113       | 0.0010 | No |
| 1612 | 1700019E08Rik | 0.0010 | No |
| 1613 | Gm44795       | 0.0010 | No |
| 1614 | Gm29293       | 0.0010 | No |
| 1615 | Tmem95        | 0.0010 | No |
| 1616 | Olfr467       | 0.0010 | No |
| 1617 | Gm24580       | 0.0010 | No |
| 1618 | Mageb5        | 0.0010 | No |
| 1619 | Gm26583       | 0.0010 | No |
| 1620 | Gm24081       | 0.0010 | No |
| 1621 | Gm23552       | 0.0010 | No |
| 1622 | Ighv2-3       | 0.0010 | No |
| 1623 | Olfr416-ps1   | 0.0010 | No |
| 1624 | Gm14275       | 0.0010 | No |
| 1625 | Gm11409       | 0.0010 | No |
| 1626 | Ppp1r2-ps1    | 0.0010 | No |
| 1627 | Fosl2         | 0.0010 | No |
| 1628 | Gm43988       | 0.0010 | No |
| 1629 | Proc          | 0.0010 | No |
| 1630 | Klkb1         | 0.0010 | No |
| 1631 | Gm14908       | 0.0010 | No |
| 1632 | Rpl35a-ps2    | 0.0010 | No |
| 1633 | Pnmt          | 0.0010 | No |
| 1634 | Gm24042       | 0.0010 | No |
| 1635 | Gm5886        | 0.0010 | No |
| 1636 | Gm20421       | 0.0010 | No |
| 1637 | Trav16        | 0.0010 | No |
| 1638 | Gm8999        | 0.0010 | No |
| 1639 | Grpr          | 0.0010 | No |
| 1640 | W11-1735G24.3 | 0.0010 | No |
| 1641 | Gm44979       | 0.0010 | No |
| 1642 | Olfr949-ps1   | 0.0010 | No |
| 1643 | 1110032F04Rik | 0.0010 | No |
| 1644 | Cryaa         | 0.0010 | No |
| 1645 | Fbln7         | 0.0010 | No |
| 1646 | 4930519D14Rik | 0.0010 | No |
| 1647 | Gm807         | 0.0010 | No |
| 1648 | Gm28746       | 0.0010 | No |
| 1649 | Gm19030       | 0.0010 | No |
| 1650 | Gm8744        | 0.0010 | No |
| 1651 | Gm31373       | 0.0010 | No |
| 1652 | Myo1e         | 0.0010 | No |
| 1653 | Gm567         | 0.0010 | No |

|      |               |        |    |
|------|---------------|--------|----|
| 1654 | Zfp217        | 0.0010 | No |
| 1655 | Gdf15         | 0.0010 | No |
| 1656 | Gm20467       | 0.0010 | No |
| 1657 | Krt80         | 0.0010 | No |
| 1658 | Grk2          | 0.0010 | No |
| 1659 | Gm9767        | 0.0010 | No |
| 1660 | Gm36999       | 0.0010 | No |
| 1661 | Gm17944       | 0.0010 | No |
| 1662 | Mir6904       | 0.0010 | No |
| 1663 | Cst11         | 0.0010 | No |
| 1664 | Gm45627       | 0.0010 | No |
| 1665 | Spp2          | 0.0010 | No |
| 1666 | Gm7195        | 0.0010 | No |
| 1667 | Olfr1131      | 0.0010 | No |
| 1668 | Gm37575       | 0.0010 | No |
| 1669 | Gpa33         | 0.0010 | No |
| 1670 | Gm26548       | 0.0010 | No |
| 1671 | Ighd2-5       | 0.0010 | No |
| 1672 | Pkib          | 0.0010 | No |
| 1673 | Ighv5-12      | 0.0010 | No |
| 1674 | Igkv4-69      | 0.0010 | No |
| 1675 | Desi2         | 0.0010 | No |
| 1676 | Skint9        | 0.0010 | No |
| 1677 | Gm38114       | 0.0010 | No |
| 1678 | Gm26614       | 0.0010 | No |
| 1679 | Gm24527       | 0.0010 | No |
| 1680 | Gm16341       | 0.0010 | No |
| 1681 | Cyp2c39       | 0.0010 | No |
| 1682 | Lingo4        | 0.0010 | No |
| 1683 | Fshr          | 0.0010 | No |
| 1684 | 4930480G23Rik | 0.0010 | No |
| 1685 | RP23-413J12.1 | 0.0010 | No |
| 1686 | mt-Tc         | 0.0010 | No |
| 1687 | Gm43727       | 0.0010 | No |
| 1688 | Psm5-ps       | 0.0010 | No |
| 1689 | Gm6797        | 0.0010 | No |
| 1690 | RP23-337L12.7 | 0.0009 | No |
| 1691 | Gm42944       | 0.0009 | No |
| 1692 | Ftx           | 0.0009 | No |
| 1693 | Gm15987       | 0.0009 | No |
| 1694 | Slc2a6        | 0.0009 | No |
| 1695 | Klhl25        | 0.0009 | No |
| 1696 | Gm29601       | 0.0009 | No |
| 1697 | Gm43161       | 0.0009 | No |
| 1698 | RP23-246D7.1  | 0.0009 | No |
| 1699 | Ms4a10        | 0.0009 | No |

|      |               |        |    |
|------|---------------|--------|----|
| 1700 | Gm3434        | 0.0009 | No |
| 1701 | 6030400A10Rik | 0.0009 | No |
| 1702 | Gm6620        | 0.0009 | No |
| 1703 | Gm5646        | 0.0009 | No |
| 1704 | Gm22011       | 0.0009 | No |
| 1705 | Gm10471       | 0.0009 | No |
| 1706 | Ifi30         | 0.0009 | No |
| 1707 | Pcsk9         | 0.0009 | No |
| 1708 | Igkv4-57-1    | 0.0009 | No |
| 1709 | Krtap4-2      | 0.0009 | No |
| 1710 | 1700046C09Rik | 0.0009 | No |
| 1711 | Gm23112       | 0.0009 | No |
| 1712 | Gm12530       | 0.0009 | No |
| 1713 | Gm8596        | 0.0009 | No |
| 1714 | Ighv8-9       | 0.0009 | No |
| 1715 | Map4          | 0.0009 | No |
| 1716 | RP23-397L11.6 | 0.0009 | No |
| 1717 | Qpct          | 0.0009 | No |
| 1718 | Gabrp         | 0.0009 | No |
| 1719 | Scyl1         | 0.0009 | No |
| 1720 | 1700065J11Rik | 0.0009 | No |
| 1721 | Rarg          | 0.0009 | No |
| 1722 | Ankrd63       | 0.0009 | No |
| 1723 | Herpud1       | 0.0009 | No |
| 1724 | Gm1322        | 0.0009 | No |
| 1725 | Iglc4         | 0.0009 | No |
| 1726 | Larp6         | 0.0009 | No |
| 1727 | Gm32111       | 0.0009 | No |
| 1728 | Gm22915       | 0.0009 | No |
| 1729 | Pbx1          | 0.0009 | No |
| 1730 | Ighv7-1       | 0.0009 | No |
| 1731 | Cyp26a1       | 0.0009 | No |
| 1732 | Gm45602       | 0.0009 | No |
| 1733 | Kcnn4         | 0.0009 | No |
| 1734 | Gm44108       | 0.0009 | No |
| 1735 | Gfra3         | 0.0009 | No |
| 1736 | Gja3          | 0.0009 | No |
| 1737 | Gm45448       | 0.0009 | No |
| 1738 | Gm36028       | 0.0009 | No |
| 1739 | Rbm11         | 0.0009 | No |
| 1740 | Gm6590        | 0.0009 | No |
| 1741 | Zkscan3       | 0.0009 | No |
| 1742 | Gm10061       | 0.0009 | No |
| 1743 | Gm29489       | 0.0009 | No |
| 1744 | Gm23962       | 0.0009 | No |
| 1745 | Gm13905       | 0.0009 | No |

|      |               |        |    |
|------|---------------|--------|----|
| 1746 | Gm26422       | 0.0009 | No |
| 1747 | I113ra1       | 0.0009 | No |
| 1748 | Mrgpra2b      | 0.0009 | No |
| 1749 | Htr1b         | 0.0009 | No |
| 1750 | Naip2         | 0.0009 | No |
| 1751 | Gm12444       | 0.0009 | No |
| 1752 | Prrx1         | 0.0009 | No |
| 1753 | Gm43001       | 0.0009 | No |
| 1754 | Olf1327-ps1   | 0.0009 | No |
| 1755 | Gm23989       | 0.0009 | No |
| 1756 | Rmrp          | 0.0009 | No |
| 1757 | Copa          | 0.0009 | No |
| 1758 | Gm11186       | 0.0009 | No |
| 1759 | Vmn1r-ps125   | 0.0009 | No |
| 1760 | Gm37912       | 0.0009 | No |
| 1761 | Gm23046       | 0.0009 | No |
| 1762 | Gm3351        | 0.0009 | No |
| 1763 | Igkv3-4       | 0.0009 | No |
| 1764 | Gm26755       | 0.0009 | No |
| 1765 | BC017643      | 0.0009 | No |
| 1766 | Pcolce2       | 0.0009 | No |
| 1767 | Olf1331       | 0.0009 | No |
| 1768 | Gm3099        | 0.0009 | No |
| 1769 | 5730409E04Rik | 0.0009 | No |
| 1770 | Gm28675       | 0.0009 | No |
| 1771 | Rprm          | 0.0009 | No |
| 1772 | Gm10258       | 0.0009 | No |
| 1773 | Smad3         | 0.0009 | No |
| 1774 | Gm20796       | 0.0009 | No |
| 1775 | Tnfsf14       | 0.0009 | No |
| 1776 | Gm5739        | 0.0009 | No |
| 1777 | Gm14109       | 0.0009 | No |
| 1778 | Olf1315       | 0.0009 | No |
| 1779 | Gm15902       | 0.0009 | No |
| 1780 | Vps26b        | 0.0009 | No |
| 1781 | Irak4         | 0.0009 | No |
| 1782 | RP24-81G20.1  | 0.0009 | No |
| 1783 | Vmn1r66       | 0.0009 | No |
| 1784 | Cetn2         | 0.0009 | No |
| 1785 | Gm14489       | 0.0009 | No |
| 1786 | Trbv26        | 0.0009 | No |
| 1787 | Vmn1r50       | 0.0009 | No |
| 1788 | Gm44293       | 0.0009 | No |
| 1789 | Pfpl          | 0.0009 | No |
| 1790 | Olf1930       | 0.0009 | No |
| 1791 | Wfdc21        | 0.0009 | No |

|      |               |        |    |
|------|---------------|--------|----|
| 1792 | Gm37511       | 0.0009 | No |
| 1793 | Prom2         | 0.0009 | No |
| 1794 | 1700065O20Rik | 0.0009 | No |
| 1795 | Cirbp         | 0.0009 | No |
| 1796 | Gm15418       | 0.0009 | No |
| 1797 | 4933404K08Rik | 0.0009 | No |
| 1798 | Olf667        | 0.0009 | No |
| 1799 | Gm14228       | 0.0009 | No |
| 1800 | Vmn2r-ps77    | 0.0009 | No |
| 1801 | Gm20069       | 0.0009 | No |
| 1802 | Gm7656        | 0.0009 | No |
| 1803 | Gm16268       | 0.0009 | No |
| 1804 | Dmrta2os      | 0.0009 | No |
| 1805 | Gm24948       | 0.0009 | No |
| 1806 | Gm43010       | 0.0009 | No |
| 1807 | Filip11       | 0.0009 | No |
| 1808 | Apoc3         | 0.0009 | No |
| 1809 | 9530026F06Rik | 0.0009 | No |
| 1810 | Leprot11      | 0.0009 | No |
| 1811 | Cdh24         | 0.0009 | No |
| 1812 | Slc37a3       | 0.0009 | No |
| 1813 | Iglc1         | 0.0009 | No |
| 1814 | FO082328.2    | 0.0009 | No |
| 1815 | Slc25a24      | 0.0009 | No |
| 1816 | Mir24-2       | 0.0009 | No |
| 1817 | Gmip          | 0.0009 | No |
| 1818 | Gm12797       | 0.0009 | No |
| 1819 | Gm31049       | 0.0009 | No |
| 1820 | Gm25267       | 0.0009 | No |
| 1821 | D5Ert615e     | 0.0009 | No |
| 1822 | Gm11732       | 0.0009 | No |
| 1823 | Fam43a        | 0.0009 | No |
| 1824 | Prkab1        | 0.0009 | No |
| 1825 | Gm13757       | 0.0009 | No |
| 1826 | Gm15271       | 0.0009 | No |
| 1827 | Gm12862       | 0.0009 | No |
| 1828 | Vmn1r178      | 0.0009 | No |
| 1829 | Moxd1         | 0.0009 | No |
| 1830 | Hmgb3-ps      | 0.0009 | No |
| 1831 | Wtip          | 0.0009 | No |
| 1832 | Gm15238       | 0.0009 | No |
| 1833 | H2-M5         | 0.0009 | No |
| 1834 | Fzd4          | 0.0009 | No |
| 1835 | Ppnr          | 0.0009 | No |
| 1836 | D730048I06Rik | 0.0009 | No |
| 1837 | Mup-ps19      | 0.0009 | No |



|      |               |        |    |
|------|---------------|--------|----|
| 1838 | Gm43630       | 0.0009 | No |
| 1839 | Gm24774       | 0.0009 | No |
| 1840 | Olf406        | 0.0009 | No |
| 1841 | Igkv10-94     | 0.0009 | No |
| 1842 | Defb4         | 0.0009 | No |
| 1843 | Klf5          | 0.0009 | No |
| 1844 | Gm23294       | 0.0009 | No |
| 1845 | Gm45489       | 0.0009 | No |
| 1846 | Gm25591       | 0.0009 | No |
| 1847 | Gm32693       | 0.0009 | No |
| 1848 | Enpp7         | 0.0009 | No |
| 1849 | Gm43444       | 0.0009 | No |
| 1850 | Acsbg1        | 0.0009 | No |
| 1851 | Gm7854        | 0.0009 | No |
| 1852 | Xlr3e-ps      | 0.0009 | No |
| 1853 | Nodal         | 0.0009 | No |
| 1854 | Islr2         | 0.0009 | No |
| 1855 | Rpl36-ps9     | 0.0009 | No |
| 1856 | Vmn1r-ps102   | 0.0009 | No |
| 1857 | Gm44251       | 0.0009 | No |
| 1858 | Gm45368       | 0.0009 | No |
| 1859 | Gm44679       | 0.0009 | No |
| 1860 | RP24-423G4.3  | 0.0009 | No |
| 1861 | Gm45011       | 0.0009 | No |
| 1862 | Gm20711       | 0.0009 | No |
| 1863 | Dcpp3         | 0.0009 | No |
| 1864 | Gm15802       | 0.0009 | No |
| 1865 | Plekha5       | 0.0009 | No |
| 1866 | Sytl3         | 0.0009 | No |
| 1867 | Igkv3-2       | 0.0009 | No |
| 1868 | Gm22711       | 0.0009 | No |
| 1869 | Gm14186       | 0.0008 | No |
| 1870 | Gm43541       | 0.0008 | No |
| 1871 | Ms4a1         | 0.0008 | No |
| 1872 | C230021G24Rik | 0.0008 | No |
| 1873 | Gm29611       | 0.0008 | No |
| 1874 | Adam18        | 0.0008 | No |
| 1875 | Gm8221        | 0.0008 | No |
| 1876 | 1700064J06Rik | 0.0008 | No |
| 1877 | Gm6893        | 0.0008 | No |
| 1878 | Vmn1r179      | 0.0008 | No |
| 1879 | Pmm2          | 0.0008 | No |
| 1880 | Gm3329        | 0.0008 | No |
| 1881 | Cldn2         | 0.0008 | No |
| 1882 | Gm11597       | 0.0008 | No |
| 1883 | Gm45440       | 0.0008 | No |

|      |               |        |    |
|------|---------------|--------|----|
| 1884 | Olf985        | 0.0008 | No |
| 1885 | Gm42630       | 0.0008 | No |
| 1886 | Gm2897        | 0.0008 | No |
| 1887 | Ighv1-71      | 0.0008 | No |
| 1888 | Gm13259       | 0.0008 | No |
| 1889 | Adamts20      | 0.0008 | No |
| 1890 | Mefv          | 0.0008 | No |
| 1891 | Avil          | 0.0008 | No |
| 1892 | Gcsam         | 0.0008 | No |
| 1893 | Fam180a       | 0.0008 | No |
| 1894 | Pla2r1        | 0.0008 | No |
| 1895 | Gm13414       | 0.0008 | No |
| 1896 | Gm8242        | 0.0008 | No |
| 1897 | Zbtb8b        | 0.0008 | No |
| 1898 | 1700029B22Rik | 0.0008 | No |
| 1899 | Gm43022       | 0.0008 | No |
| 1900 | Gm7284        | 0.0008 | No |
| 1901 | Tlr8          | 0.0008 | No |
| 1902 | BC106179      | 0.0008 | No |
| 1903 | Gm45559       | 0.0008 | No |
| 1904 | Gm2707        | 0.0008 | No |
| 1905 | Zbtb20        | 0.0008 | No |
| 1906 | Gm15854       | 0.0008 | No |
| 1907 | Gm19880       | 0.0008 | No |
| 1908 | Vmn1r-ps16    | 0.0008 | No |
| 1909 | Ankrd6        | 0.0008 | No |
| 1910 | RP23-269K2.1  | 0.0008 | No |
| 1911 | Scgb2b20      | 0.0008 | No |
| 1912 | Gm27162       | 0.0008 | No |
| 1913 | Gm5587        | 0.0008 | No |
| 1914 | Gm5002        | 0.0008 | No |
| 1915 | Igkv15-103    | 0.0008 | No |
| 1916 | 4933403O08Rik | 0.0008 | No |
| 1917 | 4933427J07Rik | 0.0008 | No |
| 1918 | Gm23262       | 0.0008 | No |
| 1919 | Fbxw14        | 0.0008 | No |
| 1920 | A730082K24Rik | 0.0008 | No |
| 1921 | Igkv11-118    | 0.0008 | No |
| 1922 | Gm43302       | 0.0008 | No |
| 1923 | Ttl2          | 0.0008 | No |
| 1924 | G6pd2         | 0.0008 | No |
| 1925 | Gm45260       | 0.0008 | No |
| 1926 | Ccr7          | 0.0008 | No |
| 1927 | H2-Ab1        | 0.0008 | No |
| 1928 | Rep15         | 0.0008 | No |
| 1929 | Trim58        | 0.0008 | No |

|      |               |        |    |
|------|---------------|--------|----|
| 1930 | Gm43751       | 0.0008 | No |
| 1931 | Ighv14-1      | 0.0008 | No |
| 1932 | Gm42561       | 0.0008 | No |
| 1933 | Gm14731       | 0.0008 | No |
| 1934 | Alx3          | 0.0008 | No |
| 1935 | Gm45202       | 0.0008 | No |
| 1936 | Olfr1483-ps1  | 0.0008 | No |
| 1937 | Ighv1-43      | 0.0008 | No |
| 1938 | Gm25901       | 0.0008 | No |
| 1939 | Gpsm2         | 0.0008 | No |
| 1940 | Far1          | 0.0008 | No |
| 1941 | Traj12        | 0.0008 | No |
| 1942 | Slx4ip        | 0.0008 | No |
| 1943 | Gm43612       | 0.0008 | No |
| 1944 | Echdc3        | 0.0008 | No |
| 1945 | Olfr649       | 0.0008 | No |
| 1946 | Gm14267       | 0.0008 | No |
| 1947 | Igkv14-126    | 0.0008 | No |
| 1948 | Nyap2         | 0.0008 | No |
| 1949 | Gm44913       | 0.0008 | No |
| 1950 | Ugt2b34       | 0.0008 | No |
| 1951 | Gm26634       | 0.0008 | No |
| 1952 | Gm24341       | 0.0008 | No |
| 1953 | Mir1961       | 0.0008 | No |
| 1954 | Gm4410        | 0.0008 | No |
| 1955 | Scgb2a2       | 0.0008 | No |
| 1956 | Mdh2          | 0.0008 | No |
| 1957 | Gm14716       | 0.0008 | No |
| 1958 | Slc16a9       | 0.0008 | No |
| 1959 | F730035P03Rik | 0.0008 | No |
| 1960 | Samd5         | 0.0008 | No |
| 1961 | 1700057H15Rik | 0.0008 | No |
| 1962 | Vmn2r31       | 0.0008 | No |
| 1963 | Gm44172       | 0.0008 | No |
| 1964 | Tas2r138      | 0.0008 | No |
| 1965 | 4930519F24Rik | 0.0008 | No |
| 1966 | Gm10568       | 0.0008 | No |
| 1967 | Ptx3          | 0.0008 | No |
| 1968 | Itih5         | 0.0008 | No |
| 1969 | Gm11837       | 0.0008 | No |
| 1970 | Gm22740       | 0.0008 | No |
| 1971 | Olfr1395      | 0.0008 | No |
| 1972 | Ctgf          | 0.0008 | No |
| 1973 | Gm11561       | 0.0008 | No |
| 1974 | Gm26147       | 0.0008 | No |
| 1975 | Lypd3         | 0.0008 | No |

|      |               |        |    |
|------|---------------|--------|----|
| 1976 | Olfr1250      | 0.0008 | No |
| 1977 | Ikzf2         | 0.0008 | No |
| 1978 | Gm44455       | 0.0008 | No |
| 1979 | 2700033N17Rik | 0.0008 | No |
| 1980 | RP23-142F22.1 | 0.0008 | No |
| 1981 | RP23-116C19.4 | 0.0008 | No |
| 1982 | Olfr830       | 0.0008 | No |
| 1983 | Gm19653       | 0.0008 | No |
| 1984 | Gm22910       | 0.0008 | No |
| 1985 | Gm14409       | 0.0008 | No |
| 1986 | Gm20617       | 0.0008 | No |
| 1987 | Mir669a-2     | 0.0008 | No |
| 1988 | Agtr1b        | 0.0008 | No |
| 1989 | Gm44879       | 0.0008 | No |
| 1990 | Itpa-ps2      | 0.0008 | No |
| 1991 | Traj3         | 0.0008 | No |
| 1992 | Gm29230       | 0.0008 | No |
| 1993 | Gm25813       | 0.0008 | No |
| 1994 | Gm11248       | 0.0008 | No |
| 1995 | Gm11515       | 0.0008 | No |
| 1996 | Gm5597        | 0.0008 | No |
| 1997 | Gm12691       | 0.0008 | No |
| 1998 | Gm43507       | 0.0008 | No |
| 1999 | Rbpms2        | 0.0008 | No |
| 2000 | Gm12010       | 0.0008 | No |
| 2001 | Gm7361        | 0.0008 | No |
| 2002 | Dapk2         | 0.0008 | No |
| 2003 | Zcwpw2        | 0.0008 | No |
| 2004 | Gm25985       | 0.0008 | No |
| 2005 | Gm29398       | 0.0008 | No |
| 2006 | Tnfsfm13      | 0.0008 | No |
| 2007 | Fam50b        | 0.0008 | No |
| 2008 | Gm13383       | 0.0008 | No |
| 2009 | Gm45563       | 0.0008 | No |
| 2010 | Gm18956       | 0.0008 | No |
| 2011 | Gm42865       | 0.0008 | No |
| 2012 | 1700028M03Rik | 0.0008 | No |
| 2013 | Pcdhga1       | 0.0008 | No |
| 2014 | Traj52        | 0.0008 | No |
| 2015 | Mir29a        | 0.0008 | No |
| 2016 | Gm19102       | 0.0008 | No |
| 2017 | Gm37996       | 0.0008 | No |
| 2018 | Nefh          | 0.0008 | No |
| 2019 | Trav5-1       | 0.0008 | No |
| 2020 | Dsg4          | 0.0008 | No |
| 2021 | Gm43760       | 0.0008 | No |

|      |               |        |    |
|------|---------------|--------|----|
| 2022 | Gm43246       | 0.0008 | No |
| 2023 | Gm12863       | 0.0008 | No |
| 2024 | Gm17025       | 0.0008 | No |
| 2025 | Nkx6-1        | 0.0008 | No |
| 2026 | Olf1450       | 0.0008 | No |
| 2027 | Umod          | 0.0008 | No |
| 2028 | Gm37180       | 0.0008 | No |
| 2029 | Olf1492-ps1   | 0.0008 | No |
| 2030 | Olf1705       | 0.0008 | No |
| 2031 | Gm38143       | 0.0008 | No |
| 2032 | Gsdma3        | 0.0008 | No |
| 2033 | Gm1988        | 0.0008 | No |
| 2034 | Olf1259       | 0.0008 | No |
| 2035 | Nucb2         | 0.0008 | No |
| 2036 | 4931431B13Rik | 0.0008 | No |
| 2037 | Gm16838       | 0.0008 | No |
| 2038 | 4930505K14Rik | 0.0008 | No |
| 2039 | Gm24610       | 0.0008 | No |
| 2040 | Clca3b        | 0.0008 | No |
| 2041 | Aldh3a1       | 0.0008 | No |
| 2042 | RP23-353K11.3 | 0.0008 | No |
| 2043 | Eps8l3        | 0.0008 | No |
| 2044 | 1700063O14Rik | 0.0008 | No |
| 2045 | Ras10a        | 0.0008 | No |
| 2046 | Gm43936       | 0.0008 | No |
| 2047 | Kcna5         | 0.0008 | No |
| 2048 | Gm16386       | 0.0008 | No |
| 2049 | 4930407G08Rik | 0.0008 | No |
| 2050 | Stat6         | 0.0008 | No |
| 2051 | Trbv20        | 0.0008 | No |
| 2052 | Bglap3        | 0.0008 | No |
| 2053 | Mir6995       | 0.0008 | No |
| 2054 | Gm17634       | 0.0008 | No |
| 2055 | Lrfrn2        | 0.0008 | No |
| 2056 | Gm14764       | 0.0008 | No |
| 2057 | Dync1h1       | 0.0008 | No |
| 2058 | Tex36         | 0.0008 | No |
| 2059 | Gm11936       | 0.0008 | No |
| 2060 | Zfp652        | 0.0008 | No |
| 2061 | Gad1          | 0.0008 | No |
| 2062 | M6pr          | 0.0008 | No |
| 2063 | Tnfrsf13      | 0.0008 | No |
| 2064 | 4930509K18Rik | 0.0008 | No |
| 2065 | 4930453O03Rik | 0.0008 | No |
| 2066 | Olf119        | 0.0008 | No |
| 2067 | Pcdhb12       | 0.0008 | No |

|      |               |        |    |
|------|---------------|--------|----|
| 2068 | Gm43820       | 0.0008 | No |
| 2069 | RP23-371B13.3 | 0.0008 | No |
| 2070 | Gm3283        | 0.0008 | No |
| 2071 | Gm45377       | 0.0008 | No |
| 2072 | Olf742        | 0.0008 | No |
| 2073 | Ighv1-30      | 0.0008 | No |
| 2074 | Dynap         | 0.0008 | No |
| 2075 | Rps13         | 0.0008 | No |
| 2076 | Gm24908       | 0.0008 | No |
| 2077 | Gm4746        | 0.0008 | No |
| 2078 | Adamdec1      | 0.0007 | No |
| 2079 | Dntt          | 0.0007 | No |
| 2080 | Gm43253       | 0.0007 | No |
| 2081 | Trbv10        | 0.0007 | No |
| 2082 | Gm12711       | 0.0007 | No |
| 2083 | Prg3          | 0.0007 | No |
| 2084 | B230104I21Rik | 0.0007 | No |
| 2085 | Gm42768       | 0.0007 | No |
| 2086 | Tmem179       | 0.0007 | No |
| 2087 | Gm43711       | 0.0007 | No |
| 2088 | Gm24098       | 0.0007 | No |
| 2089 | Gm43035       | 0.0007 | No |
| 2090 | Gm25384       | 0.0007 | No |
| 2091 | CH25-395E5.1  | 0.0007 | No |
| 2092 | Vmn2r84       | 0.0007 | No |
| 2093 | Gm23608       | 0.0007 | No |
| 2094 | Gtf3c3        | 0.0007 | No |
| 2095 | RP23-2D7.21   | 0.0007 | No |
| 2096 | Hs3st3a1      | 0.0007 | No |
| 2097 | Bcl11a        | 0.0007 | No |
| 2098 | Odf3          | 0.0007 | No |
| 2099 | 1700087M22Rik | 0.0007 | No |
| 2100 | Gm44206       | 0.0007 | No |
| 2101 | Mageb8-ps     | 0.0007 | No |
| 2102 | Igkv4-57      | 0.0007 | No |
| 2103 | Olf662-ps1    | 0.0007 | No |
| 2104 | Gm23704       | 0.0007 | No |
| 2105 | Gm22325       | 0.0007 | No |
| 2106 | Ccl12         | 0.0007 | No |
| 2107 | Gm6637        | 0.0007 | No |
| 2108 | Trav9-1       | 0.0007 | No |
| 2109 | Mup11         | 0.0007 | No |
| 2110 | Gm13455       | 0.0007 | No |
| 2111 | Gm38158       | 0.0007 | No |
| 2112 | Il12rb1       | 0.0007 | No |
| 2113 | Gm7457        | 0.0007 | No |

|      |               |        |    |
|------|---------------|--------|----|
| 2114 | Gm44081       | 0.0007 | No |
| 2115 | Gm44850       | 0.0007 | No |
| 2116 | AC132444.5    | 0.0007 | No |
| 2117 | Gm13788       | 0.0007 | No |
| 2118 | Gm10649       | 0.0007 | No |
| 2119 | Adcy3         | 0.0007 | No |
| 2120 | Arl11         | 0.0007 | No |
| 2121 | Gm37481       | 0.0007 | No |
| 2122 | Igf1          | 0.0007 | No |
| 2123 | Gm37355       | 0.0007 | No |
| 2124 | Gm26098       | 0.0007 | No |
| 2125 | Gm44933       | 0.0007 | No |
| 2126 | Traj23        | 0.0007 | No |
| 2127 | Gm22678       | 0.0007 | No |
| 2128 | Gm5039        | 0.0007 | No |
| 2129 | Gm43572       | 0.0007 | No |
| 2130 | Lrrfip2       | 0.0007 | No |
| 2131 | Scnn1b        | 0.0007 | No |
| 2132 | E130201H02Rik | 0.0007 | No |
| 2133 | Gm27717       | 0.0007 | No |
| 2134 | Gm45048       | 0.0007 | No |
| 2135 | Hapln2        | 0.0007 | No |
| 2136 | Gm15065       | 0.0007 | No |
| 2137 | Acvr11        | 0.0007 | No |
| 2138 | Cypt4         | 0.0007 | No |
| 2139 | Mir6997       | 0.0007 | No |
| 2140 | Gm24816       | 0.0007 | No |
| 2141 | Vmn2r-ps65    | 0.0007 | No |
| 2142 | Gm4847        | 0.0007 | No |
| 2143 | Gm20491       | 0.0007 | No |
| 2144 | Hoxb9         | 0.0007 | No |
| 2145 | Ell           | 0.0007 | No |
| 2146 | Veph1         | 0.0007 | No |
| 2147 | Olfir531      | 0.0007 | No |
| 2148 | Gm28985       | 0.0007 | No |
| 2149 | Gm7790        | 0.0007 | No |
| 2150 | Gm43648       | 0.0007 | No |
| 2151 | Gm14224       | 0.0007 | No |
| 2152 | Tmsb15a       | 0.0007 | No |
| 2153 | Olfir75-ps1   | 0.0007 | No |
| 2154 | Tspyl1        | 0.0007 | No |
| 2155 | Gm13483       | 0.0007 | No |
| 2156 | Gm4409        | 0.0007 | No |
| 2157 | Gm10297       | 0.0007 | No |
| 2158 | Lypd6b        | 0.0007 | No |
| 2159 | Mir6240       | 0.0007 | No |

|      |               |        |    |
|------|---------------|--------|----|
| 2160 | Gm43678       | 0.0007 | No |
| 2161 | Gm38109       | 0.0007 | No |
| 2162 | Olfr542-ps1   | 0.0007 | No |
| 2163 | Serpina3d-ps  | 0.0007 | No |
| 2164 | RP24-318O6.2  | 0.0007 | No |
| 2165 | Gm8676        | 0.0007 | No |
| 2166 | Gm36929       | 0.0007 | No |
| 2167 | Noxred1       | 0.0007 | No |
| 2168 | Gm14679       | 0.0007 | No |
| 2169 | Svs3a         | 0.0007 | No |
| 2170 | Traj41        | 0.0007 | No |
| 2171 | Gm37972       | 0.0007 | No |
| 2172 | RP24-425L9.3  | 0.0007 | No |
| 2173 | Gm28095       | 0.0007 | No |
| 2174 | Gm29438       | 0.0007 | No |
| 2175 | Gm15851       | 0.0007 | No |
| 2176 | Olfr1311      | 0.0007 | No |
| 2177 | Slc7a12       | 0.0007 | No |
| 2178 | Gm43953       | 0.0007 | No |
| 2179 | Gm23291       | 0.0007 | No |
| 2180 | Gm25526       | 0.0007 | No |
| 2181 | Zdhhc15       | 0.0007 | No |
| 2182 | Lce1b         | 0.0007 | No |
| 2183 | Gm37663       | 0.0007 | No |
| 2184 | Neu2          | 0.0007 | No |
| 2185 | Gm45103       | 0.0007 | No |
| 2186 | Gulp1         | 0.0007 | No |
| 2187 | Gm867         | 0.0007 | No |
| 2188 | 2610001A08Rik | 0.0007 | No |
| 2189 | Gm11731       | 0.0007 | No |
| 2190 | Gm42975       | 0.0007 | No |
| 2191 | Rpl28-ps4     | 0.0007 | No |
| 2192 | 2900092C05Rik | 0.0007 | No |
| 2193 | Olfr205       | 0.0007 | No |
| 2194 | Gm37857       | 0.0007 | No |
| 2195 | Olfr444       | 0.0007 | No |
| 2196 | Trav10        | 0.0007 | No |
| 2197 | 1700007L15Rik | 0.0007 | No |
| 2198 | RP23-33B7.1   | 0.0007 | No |
| 2199 | Gm44538       | 0.0007 | No |
| 2200 | Gm37151       | 0.0007 | No |
| 2201 | Abca2         | 0.0007 | No |
| 2202 | Gm13650       | 0.0007 | No |
| 2203 | Vegfc         | 0.0007 | No |
| 2204 | Olfr941-ps1   | 0.0007 | No |
| 2205 | Gm24338       | 0.0007 | No |



|      |               |        |    |
|------|---------------|--------|----|
| 2206 | Gm10217       | 0.0007 | No |
| 2207 | Gm28915       | 0.0007 | No |
| 2208 | Gm23609       | 0.0007 | No |
| 2209 | 2410137M14Rik | 0.0007 | No |
| 2210 | Dlx6          | 0.0007 | No |
| 2211 | Skap2         | 0.0007 | No |
| 2212 | Olf1463       | 0.0007 | No |
| 2213 | Gm37867       | 0.0007 | No |
| 2214 | Igkv4-63      | 0.0007 | No |
| 2215 | Gm12436       | 0.0007 | No |
| 2216 | Ighv9-2       | 0.0007 | No |
| 2217 | Gm13411       | 0.0007 | No |
| 2218 | Gm45132       | 0.0007 | No |
| 2219 | Gm13052       | 0.0007 | No |
| 2220 | Mir6398       | 0.0007 | No |
| 2221 | Gm11848       | 0.0007 | No |
| 2222 | Mir7025       | 0.0007 | No |
| 2223 | A530030E21Rik | 0.0007 | No |
| 2224 | Gm42864       | 0.0007 | No |
| 2225 | RP24-340I7.2  | 0.0007 | No |
| 2226 | Ifna11        | 0.0007 | No |
| 2227 | Trav6n-5      | 0.0007 | No |
| 2228 | Gm4760        | 0.0007 | No |
| 2229 | Prss28        | 0.0007 | No |
| 2230 | 4930515B02Rik | 0.0007 | No |
| 2231 | Cyp4b1-ps2    | 0.0007 | No |
| 2232 | Slc30a5       | 0.0007 | No |
| 2233 | Gm15986       | 0.0007 | No |
| 2234 | Rpl35a        | 0.0007 | No |
| 2235 | Gm44078       | 0.0007 | No |
| 2236 | 1700011D18Rik | 0.0007 | No |
| 2237 | Gspt2         | 0.0007 | No |
| 2238 | Gm44316       | 0.0007 | No |
| 2239 | Tmem200b      | 0.0007 | No |
| 2240 | Atp6v0a1      | 0.0007 | No |
| 2241 | Gm9238        | 0.0007 | No |
| 2242 | Gm12142       | 0.0007 | No |
| 2243 | RP24-167A12.5 | 0.0007 | No |
| 2244 | Olf1978       | 0.0007 | No |
| 2245 | Gm20484       | 0.0007 | No |
| 2246 | Gm44018       | 0.0007 | No |
| 2247 | Trpc3         | 0.0007 | No |
| 2248 | Tmem213       | 0.0007 | No |
| 2249 | Traj48        | 0.0007 | No |
| 2250 | Gm25747       | 0.0007 | No |
| 2251 | Gm45624       | 0.0007 | No |

|      |                |        |    |
|------|----------------|--------|----|
| 2252 | Gm13269        | 0.0007 | No |
| 2253 | Mettl7a3       | 0.0007 | No |
| 2254 | Dmwd           | 0.0007 | No |
| 2255 | RP23-91H23.1   | 0.0007 | No |
| 2256 | RP23-385N1.1   | 0.0007 | No |
| 2257 | Gm37354        | 0.0007 | No |
| 2258 | Trav16n        | 0.0007 | No |
| 2259 | Gm14339        | 0.0007 | No |
| 2260 | Gm25684        | 0.0007 | No |
| 2261 | Gm27342        | 0.0007 | No |
| 2262 | Gm26413        | 0.0007 | No |
| 2263 | Lrrc72         | 0.0007 | No |
| 2264 | Olfrl157       | 0.0007 | No |
| 2265 | Eps8l2         | 0.0007 | No |
| 2266 | Ighv8-15       | 0.0007 | No |
| 2267 | Gm3103         | 0.0007 | No |
| 2268 | Gm15349        | 0.0007 | No |
| 2269 | Tarm1          | 0.0007 | No |
| 2270 | Cecr5          | 0.0007 | No |
| 2271 | 5830432E09Rik  | 0.0007 | No |
| 2272 | Gm23293        | 0.0007 | No |
| 2273 | Gm13534        | 0.0007 | No |
| 2274 | Gm37611        | 0.0007 | No |
| 2275 | RP23-181A8.3   | 0.0007 | No |
| 2276 | Gm11825        | 0.0007 | No |
| 2277 | Akr1c13        | 0.0007 | No |
| 2278 | Gm43115        | 0.0007 | No |
| 2279 | Trav13-2       | 0.0007 | No |
| 2280 | Gm44288        | 0.0007 | No |
| 2281 | Igkv4-53       | 0.0007 | No |
| 2282 | Gm8853         | 0.0007 | No |
| 2283 | Gm10319        | 0.0007 | No |
| 2284 | RP23-263O15.12 | 0.0007 | No |
| 2285 | Gm4450         | 0.0007 | No |
| 2286 | Gm16296        | 0.0007 | No |
| 2287 | 9530059O14Rik  | 0.0007 | No |
| 2288 | Gm44744        | 0.0007 | No |
| 2289 | Gm28821        | 0.0007 | No |
| 2290 | Gm11622        | 0.0007 | No |
| 2291 | Gm43962        | 0.0007 | No |
| 2292 | Gm29302        | 0.0007 | No |
| 2293 | Trav7-4        | 0.0007 | No |
| 2294 | Efna2          | 0.0007 | No |
| 2295 | Zfp987         | 0.0007 | No |
| 2296 | Gldnos         | 0.0007 | No |
| 2297 | Cd300c2        | 0.0007 | No |

|      |               |        |    |
|------|---------------|--------|----|
| 2298 | Gm20586       | 0.0007 | No |
| 2299 | Ighv1-79      | 0.0007 | No |
| 2300 | RP24-329C11.8 | 0.0007 | No |
| 2301 | Gm45098       | 0.0007 | No |
| 2302 | Ncor1         | 0.0007 | No |
| 2303 | Gm24442       | 0.0007 | No |
| 2304 | Vmn1r-ps100   | 0.0007 | No |
| 2305 | Gm22950       | 0.0007 | No |
| 2306 | Gm14342       | 0.0007 | No |
| 2307 | Ighv1-62-3    | 0.0007 | No |
| 2308 | Itrp3         | 0.0007 | No |
| 2309 | Gm24484       | 0.0006 | No |
| 2310 | Gm25844       | 0.0006 | No |
| 2311 | Traj51        | 0.0006 | No |
| 2312 | Peg13         | 0.0006 | No |
| 2313 | Gm16411       | 0.0006 | No |
| 2314 | Gm23853       | 0.0006 | No |
| 2315 | Trav9-2       | 0.0006 | No |
| 2316 | Gm28148       | 0.0006 | No |
| 2317 | Olfir655      | 0.0006 | No |
| 2318 | Mmp12         | 0.0006 | No |
| 2319 | RP23-360L22.3 | 0.0006 | No |
| 2320 | RP23-319D22.1 | 0.0006 | No |
| 2321 | Vmn2r17       | 0.0006 | No |
| 2322 | Traj19        | 0.0006 | No |
| 2323 | Gm15635       | 0.0006 | No |
| 2324 | Prss32        | 0.0006 | No |
| 2325 | C230057A21Rik | 0.0006 | No |
| 2326 | Gm7258        | 0.0006 | No |
| 2327 | Gm12949       | 0.0006 | No |
| 2328 | Gm14592       | 0.0006 | No |
| 2329 | Gm14752       | 0.0006 | No |
| 2330 | Olfir1398-ps1 | 0.0006 | No |
| 2331 | Gm44183       | 0.0006 | No |
| 2332 | Hctr1         | 0.0006 | No |
| 2333 | Mir6964       | 0.0006 | No |
| 2334 | Gm45141       | 0.0006 | No |
| 2335 | Ighj1         | 0.0006 | No |
| 2336 | RP23-212C9.3  | 0.0006 | No |
| 2337 | Fam78b        | 0.0006 | No |
| 2338 | Rab8b         | 0.0006 | No |
| 2339 | Gm18558       | 0.0006 | No |
| 2340 | Ubxn4         | 0.0006 | No |
| 2341 | Fam217a       | 0.0006 | No |
| 2342 | Gm24990       | 0.0006 | No |
| 2343 | 4921511C20Rik | 0.0006 | No |

|      |               |        |    |
|------|---------------|--------|----|
| 2344 | Gm28634       | 0.0006 | No |
| 2345 | Lrat          | 0.0006 | No |
| 2346 | Sbk2          | 0.0006 | No |
| 2347 | Kat2b-ps      | 0.0006 | No |
| 2348 | Timm17a       | 0.0006 | No |
| 2349 | Gm11813       | 0.0006 | No |
| 2350 | Cryga         | 0.0006 | No |
| 2351 | Bcor          | 0.0006 | No |
| 2352 | Gm15693       | 0.0006 | No |
| 2353 | Gm13380       | 0.0006 | No |
| 2354 | RP23-145G7.4  | 0.0006 | No |
| 2355 | Gm44038       | 0.0006 | No |
| 2356 | St6galnac5    | 0.0006 | No |
| 2357 | Gm18492       | 0.0006 | No |
| 2358 | Gm23523       | 0.0006 | No |
| 2359 | Gm4772        | 0.0006 | No |
| 2360 | Slc12a7       | 0.0006 | No |
| 2361 | Gm13055       | 0.0006 | No |
| 2362 | Gm2878        | 0.0006 | No |
| 2363 | Obp2b         | 0.0006 | No |
| 2364 | Cplx1         | 0.0006 | No |
| 2365 | Wfdc2         | 0.0006 | No |
| 2366 | RP23-390G15.1 | 0.0006 | No |
| 2367 | Gm12027       | 0.0006 | No |
| 2368 | Gm37888       | 0.0006 | No |
| 2369 | 4930547E08Rik | 0.0006 | No |
| 2370 | Gm14765       | 0.0006 | No |
| 2371 | Gm22637       | 0.0006 | No |
| 2372 | Gm22492       | 0.0006 | No |
| 2373 | Nlrp4d        | 0.0006 | No |
| 2374 | Igkv12-44     | 0.0006 | No |
| 2375 | Mir467g       | 0.0006 | No |
| 2376 | Gm20677       | 0.0006 | No |
| 2377 | Olfir519      | 0.0006 | No |
| 2378 | RP23-10E9.1   | 0.0006 | No |
| 2379 | Klk14         | 0.0006 | No |
| 2380 | Gm14529       | 0.0006 | No |
| 2381 | Gm16168       | 0.0006 | No |
| 2382 | Gm8540        | 0.0006 | No |
| 2383 | Bcan          | 0.0006 | No |
| 2384 | Mir6947       | 0.0006 | No |
| 2385 | Olfir962-ps1  | 0.0006 | No |
| 2386 | Mir8111       | 0.0006 | No |
| 2387 | Gm18595       | 0.0006 | No |
| 2388 | Gm25339       | 0.0006 | No |
| 2389 | Gm44660       | 0.0006 | No |

|      |                |        |    |
|------|----------------|--------|----|
| 2390 | 4930549C01Rik  | 0.0006 | No |
| 2391 | Gm13293        | 0.0006 | No |
| 2392 | Gm10484        | 0.0006 | No |
| 2393 | Gm29273        | 0.0006 | No |
| 2394 | Gm16202        | 0.0006 | No |
| 2395 | Gm454          | 0.0006 | No |
| 2396 | Syt8           | 0.0006 | No |
| 2397 | Gm12384        | 0.0006 | No |
| 2398 | Igkv17-121     | 0.0006 | No |
| 2399 | Fat3           | 0.0006 | No |
| 2400 | Gm45424        | 0.0006 | No |
| 2401 | Gm20610        | 0.0006 | No |
| 2402 | Gm12065        | 0.0006 | No |
| 2403 | Gm38093        | 0.0006 | No |
| 2404 | Olf240-ps1     | 0.0006 | No |
| 2405 | 2700069I18Rik  | 0.0006 | No |
| 2406 | Gm17638        | 0.0006 | No |
| 2407 | Vmn1r68        | 0.0006 | No |
| 2408 | Ms4a12         | 0.0006 | No |
| 2409 | Cplx4          | 0.0006 | No |
| 2410 | Igkv8-30       | 0.0006 | No |
| 2411 | Gm12708        | 0.0006 | No |
| 2412 | Olf388-ps1     | 0.0006 | No |
| 2413 | Olf732         | 0.0006 | No |
| 2414 | Gm2080         | 0.0006 | No |
| 2415 | 4930522H14Rik  | 0.0006 | No |
| 2416 | Prdx2-rs3      | 0.0006 | No |
| 2417 | Mapk4          | 0.0006 | No |
| 2418 | RP24-167A12.3  | 0.0006 | No |
| 2419 | Sectm1b        | 0.0006 | No |
| 2420 | Gm43009        | 0.0006 | No |
| 2421 | Vmn2r100       | 0.0006 | No |
| 2422 | Lasp1          | 0.0006 | No |
| 2423 | Gm5548         | 0.0006 | No |
| 2424 | Park2          | 0.0006 | No |
| 2425 | Gm42891        | 0.0006 | No |
| 2426 | Gm11788        | 0.0006 | No |
| 2427 | Fcgr2b         | 0.0006 | No |
| 2428 | Vmn1r219       | 0.0006 | No |
| 2429 | Olf980         | 0.0006 | No |
| 2430 | 2810047C21Rik1 | 0.0006 | No |
| 2431 | Gm23848        | 0.0006 | No |
| 2432 | Gm8183         | 0.0006 | No |
| 2433 | Gm23002        | 0.0006 | No |
| 2434 | Gm44591        | 0.0006 | No |
| 2435 | Tmod1          | 0.0006 | No |

|      |               |        |    |
|------|---------------|--------|----|
| 2436 | Gm15688       | 0.0006 | No |
| 2437 | Selenbp2      | 0.0006 | No |
| 2438 | Nmd3          | 0.0006 | No |
| 2439 | Brs3          | 0.0006 | No |
| 2440 | Chrna3        | 0.0006 | No |
| 2441 | Gm37890       | 0.0006 | No |
| 2442 | Gm5252        | 0.0006 | No |
| 2443 | Igkv13-61-1   | 0.0006 | No |
| 2444 | Gm43326       | 0.0006 | No |
| 2445 | Gm11950       | 0.0006 | No |
| 2446 | Cmc1          | 0.0006 | No |
| 2447 | Mir1970       | 0.0006 | No |
| 2448 | Gm38065       | 0.0006 | No |
| 2449 | Gm25887       | 0.0006 | No |
| 2450 | Mir148a       | 0.0006 | No |
| 2451 | Olfr698       | 0.0006 | No |
| 2452 | Gm13724       | 0.0006 | No |
| 2453 | Gm17105       | 0.0006 | No |
| 2454 | 9230109A22Rik | 0.0006 | No |
| 2455 | Gm15848       | 0.0006 | No |
| 2456 | Ptpn9         | 0.0006 | No |
| 2457 | Gm36973       | 0.0006 | No |
| 2458 | Gm3279        | 0.0006 | No |
| 2459 | Gm19031       | 0.0006 | No |
| 2460 | Igsf21        | 0.0006 | No |
| 2461 | A330044P14Rik | 0.0006 | No |
| 2462 | Ighv12-3      | 0.0006 | No |
| 2463 | Gm15670       | 0.0006 | No |
| 2464 | Olfr296-ps1   | 0.0006 | No |
| 2465 | Traj32        | 0.0006 | No |
| 2466 | Gm12886       | 0.0006 | No |
| 2467 | Gm14280       | 0.0006 | No |
| 2468 | Klhl14        | 0.0006 | No |
| 2469 | Alkbh3        | 0.0006 | No |
| 2470 | Gm5799        | 0.0006 | No |
| 2471 | Irf8          | 0.0006 | No |
| 2472 | Olfr378       | 0.0006 | No |
| 2473 | Obox4-ps30    | 0.0006 | No |
| 2474 | Olfr961       | 0.0006 | No |
| 2475 | Prr32         | 0.0006 | No |
| 2476 | Gm18757       | 0.0006 | No |
| 2477 | Gm6275        | 0.0006 | No |
| 2478 | Spink14       | 0.0006 | No |
| 2479 | Gm4846        | 0.0006 | No |
| 2480 | Gm6973        | 0.0006 | No |
| 2481 | Gm28919       | 0.0006 | No |

|      |               |        |    |
|------|---------------|--------|----|
| 2482 | Gm20629       | 0.0006 | No |
| 2483 | Radil         | 0.0006 | No |
| 2484 | A930002I21Rik | 0.0006 | No |
| 2485 | 7530428D23Rik | 0.0006 | No |
| 2486 | Clec2i        | 0.0006 | No |
| 2487 | Olf1r916      | 0.0006 | No |
| 2488 | Apo19a        | 0.0006 | No |
| 2489 | Lhfp15        | 0.0006 | No |
| 2490 | Igkv6-14      | 0.0006 | No |
| 2491 | 9230113P08Rik | 0.0006 | No |
| 2492 | Tas2r123      | 0.0006 | No |
| 2493 | Gm13745       | 0.0006 | No |
| 2494 | H1fx          | 0.0006 | No |
| 2495 | Gm12424       | 0.0006 | No |
| 2496 | Mir582        | 0.0006 | No |
| 2497 | Elane         | 0.0006 | No |
| 2498 | Gm29022       | 0.0006 | No |
| 2499 | Gm20946       | 0.0006 | No |
| 2500 | Gm15988       | 0.0006 | No |
| 2501 | Olf1r618      | 0.0006 | No |
| 2502 | Ighv2-7       | 0.0006 | No |
| 2503 | Gm23445       | 0.0006 | No |
| 2504 | Traj26        | 0.0006 | No |
| 2505 | Gm14843       | 0.0006 | No |
| 2506 | Tpm4          | 0.0006 | No |
| 2507 | Gm18296       | 0.0006 | No |
| 2508 | Gm12714       | 0.0006 | No |
| 2509 | Gm6794        | 0.0006 | No |
| 2510 | Gm12131       | 0.0006 | No |
| 2511 | Gm38128       | 0.0006 | No |
| 2512 | Rnu3b4        | 0.0006 | No |
| 2513 | Gm18995       | 0.0006 | No |
| 2514 | Gm23128       | 0.0006 | No |
| 2515 | Arf3          | 0.0006 | No |
| 2516 | Olf1r523      | 0.0006 | No |
| 2517 | Gm43620       | 0.0006 | No |
| 2518 | Olf1r1537     | 0.0006 | No |
| 2519 | Apoa1         | 0.0006 | No |
| 2520 | L1gl2         | 0.0006 | No |
| 2521 | 6330419E04Rik | 0.0006 | No |
| 2522 | Gm9005        | 0.0006 | No |
| 2523 | Gm38167       | 0.0006 | No |
| 2524 | Gm24930       | 0.0006 | No |
| 2525 | Gm45165       | 0.0006 | No |
| 2526 | Gm11335       | 0.0006 | No |
| 2527 | Ins15         | 0.0006 | No |

|      |                |        |    |
|------|----------------|--------|----|
| 2528 | Ripply1        | 0.0006 | No |
| 2529 | Vmn1r82        | 0.0006 | No |
| 2530 | Gm43911        | 0.0006 | No |
| 2531 | Trav13n-4      | 0.0006 | No |
| 2532 | Olfir559       | 0.0006 | No |
| 2533 | RP23-181A8.5   | 0.0006 | No |
| 2534 | Phgr1          | 0.0006 | No |
| 2535 | Mir7688        | 0.0006 | No |
| 2536 | Cabp5          | 0.0006 | No |
| 2537 | 1700019B21Rik  | 0.0006 | No |
| 2538 | Olfir692       | 0.0006 | No |
| 2539 | Lilra5         | 0.0006 | No |
| 2540 | Pira2          | 0.0006 | No |
| 2541 | Gm13261        | 0.0006 | No |
| 2542 | Mir466f-4      | 0.0006 | No |
| 2543 | Gm29563        | 0.0006 | No |
| 2544 | 1700026J14Rik  | 0.0006 | No |
| 2545 | Ccdc159        | 0.0006 | No |
| 2546 | Gm22621        | 0.0006 | No |
| 2547 | Gm15985        | 0.0006 | No |
| 2548 | Gm37468        | 0.0006 | No |
| 2549 | Gm24504        | 0.0006 | No |
| 2550 | CAAA01098150.1 | 0.0006 | No |
| 2551 | Olfir283       | 0.0006 | No |
| 2552 | Syndig11       | 0.0006 | No |
| 2553 | Hacd3          | 0.0006 | No |
| 2554 | Gm13016        | 0.0006 | No |
| 2555 | Mir6985        | 0.0006 | No |
| 2556 | Gm32381        | 0.0006 | No |
| 2557 | Gm43697        | 0.0006 | No |
| 2558 | Gm29543        | 0.0006 | No |
| 2559 | Gm25271        | 0.0006 | No |
| 2560 | Gm42454        | 0.0006 | No |
| 2561 | 4930502E18Rik  | 0.0006 | No |
| 2562 | Mrgprc3-ps     | 0.0006 | No |
| 2563 | Gm38010        | 0.0006 | No |
| 2564 | Calm5          | 0.0006 | No |
| 2565 | A430018G15Rik  | 0.0006 | No |
| 2566 | Gm17606        | 0.0006 | No |
| 2567 | Hoxb3          | 0.0006 | No |
| 2568 | RP23-438P19.10 | 0.0006 | No |
| 2569 | RP24-216P6.4   | 0.0006 | No |
| 2570 | RP24-232I9.2   | 0.0006 | No |
| 2571 | Gm22726        | 0.0006 | No |
| 2572 | Gm381          | 0.0006 | No |
| 2573 | Gm5307         | 0.0006 | No |



|      |               |        |    |
|------|---------------|--------|----|
| 2574 | C330019F10Rik | 0.0006 | No |
| 2575 | Slc22a7       | 0.0006 | No |
| 2576 | Mir6972       | 0.0006 | No |
| 2577 | Gm45208       | 0.0006 | No |
| 2578 | Tmem225       | 0.0006 | No |
| 2579 | Spz1          | 0.0006 | No |
| 2580 | Gm45325       | 0.0006 | No |
| 2581 | 4930412C18Rik | 0.0006 | No |
| 2582 | Odf3l2        | 0.0006 | No |
| 2583 | 1700029E06Rik | 0.0006 | No |
| 2584 | Gm4767        | 0.0006 | No |
| 2585 | Ticam2        | 0.0006 | No |
| 2586 | Gm44324       | 0.0006 | No |
| 2587 | Gm13439       | 0.0006 | No |
| 2588 | Olfir631      | 0.0006 | No |
| 2589 | Traj38        | 0.0006 | No |
| 2590 | 4930466I24Rik | 0.0006 | No |
| 2591 | Gm14851       | 0.0006 | No |
| 2592 | Olfir26       | 0.0006 | No |
| 2593 | Gm43021       | 0.0005 | No |
| 2594 | Gm6903        | 0.0005 | No |
| 2595 | Defa-ps11     | 0.0005 | No |
| 2596 | Obox3         | 0.0005 | No |
| 2597 | Gm43728       | 0.0005 | No |
| 2598 | 4930404H24Rik | 0.0005 | No |
| 2599 | Igkv12-98     | 0.0005 | No |
| 2600 | RP24-397P9.4  | 0.0005 | No |
| 2601 | Htra1         | 0.0005 | No |
| 2602 | Gm24143       | 0.0005 | No |
| 2603 | AI504432      | 0.0005 | No |
| 2604 | Gm11587       | 0.0005 | No |
| 2605 | 1190003K10Rik | 0.0005 | No |
| 2606 | Gm28286       | 0.0005 | No |
| 2607 | Gm44958       | 0.0005 | No |
| 2608 | Gm28807       | 0.0005 | No |
| 2609 | Slain2        | 0.0005 | No |
| 2610 | Gip           | 0.0005 | No |
| 2611 | RP23-269O24.7 | 0.0005 | No |
| 2612 | Ighv2-6       | 0.0005 | No |
| 2613 | Cdrt4os2      | 0.0005 | No |
| 2614 | RP23-114B10.3 | 0.0005 | No |
| 2615 | Gm16327       | 0.0005 | No |
| 2616 | Gm43919       | 0.0005 | No |
| 2617 | Gm5681        | 0.0005 | No |
| 2618 | Olfir727      | 0.0005 | No |
| 2619 | A630009H07Rik | 0.0005 | No |

|      |               |        |    |
|------|---------------|--------|----|
| 2620 | Trdj1         | 0.0005 | No |
| 2621 | Gm45419       | 0.0005 | No |
| 2622 | Wif1          | 0.0005 | No |
| 2623 | Ctsg          | 0.0005 | No |
| 2624 | Lect2         | 0.0005 | No |
| 2625 | Taar8b        | 0.0005 | No |
| 2626 | Pcbd1         | 0.0005 | No |
| 2627 | Cpsf2         | 0.0005 | No |
| 2628 | Gm2343        | 0.0005 | No |
| 2629 | Gm15923       | 0.0005 | No |
| 2630 | Gm12927       | 0.0005 | No |
| 2631 | Gm14375       | 0.0005 | No |
| 2632 | Gm43394       | 0.0005 | No |
| 2633 | Sdr9c7        | 0.0005 | No |
| 2634 | Gm38840       | 0.0005 | No |
| 2635 | Rln3          | 0.0005 | No |
| 2636 | 1700055C04Rik | 0.0005 | No |
| 2637 | Tnni1         | 0.0005 | No |
| 2638 | Gm22755       | 0.0005 | No |
| 2639 | Snhg18        | 0.0005 | No |
| 2640 | Gm18353       | 0.0005 | No |
| 2641 | Vmn2r-ps33    | 0.0005 | No |
| 2642 | Mir7678       | 0.0005 | No |
| 2643 | Defa17        | 0.0005 | No |
| 2644 | Gm9905        | 0.0005 | No |
| 2645 | Ii3           | 0.0005 | No |
| 2646 | Gm2800        | 0.0005 | No |
| 2647 | 8030442B05Rik | 0.0005 | No |
| 2648 | Gm30043       | 0.0005 | No |
| 2649 | A630091E08Rik | 0.0005 | No |
| 2650 | Pvalb         | 0.0005 | No |
| 2651 | Gm12639       | 0.0005 | No |
| 2652 | Gm23206       | 0.0005 | No |
| 2653 | Gm37891       | 0.0005 | No |
| 2654 | Olf130        | 0.0005 | No |
| 2655 | Gm22265       | 0.0005 | No |
| 2656 | Mgrn1         | 0.0005 | No |
| 2657 | BC051076      | 0.0005 | No |
| 2658 | Gm24295       | 0.0005 | No |
| 2659 | Ighv3-7       | 0.0005 | No |
| 2660 | Gm22846       | 0.0005 | No |
| 2661 | Gm22616       | 0.0005 | No |
| 2662 | Gm9951        | 0.0005 | No |
| 2663 | Gm19668       | 0.0005 | No |
| 2664 | Gm22613       | 0.0005 | No |
| 2665 | Gm13480       | 0.0005 | No |

|      |               |        |    |
|------|---------------|--------|----|
| 2666 | Gm13195       | 0.0005 | No |
| 2667 | Vmn1r-ps84    | 0.0005 | No |
| 2668 | Gm44717       | 0.0005 | No |
| 2669 | Sox5os3       | 0.0005 | No |
| 2670 | Gm11815       | 0.0005 | No |
| 2671 | Ighv2-4       | 0.0005 | No |
| 2672 | Lce3f         | 0.0005 | No |
| 2673 | Folr1         | 0.0005 | No |
| 2674 | 1700018A14Rik | 0.0005 | No |
| 2675 | Ighv8-5       | 0.0005 | No |
| 2676 | Pard3bos2     | 0.0005 | No |
| 2677 | Gm29254       | 0.0005 | No |
| 2678 | Gm44079       | 0.0005 | No |
| 2679 | 1110028F18Rik | 0.0005 | No |
| 2680 | Gdf2          | 0.0005 | No |
| 2681 | Mgp           | 0.0005 | No |
| 2682 | Cdk14         | 0.0005 | No |
| 2683 | Gm45128       | 0.0005 | No |
| 2684 | Gm24693       | 0.0005 | No |
| 2685 | RP23-113K14.1 | 0.0005 | No |
| 2686 | RP23-18I3.1   | 0.0005 | No |
| 2687 | Rbp1          | 0.0005 | No |
| 2688 | Sox5os1       | 0.0005 | No |
| 2689 | Mrgprc7-ps    | 0.0005 | No |
| 2690 | RP23-433B2.7  | 0.0005 | No |
| 2691 | Sall3         | 0.0005 | No |
| 2692 | Copz2         | 0.0005 | No |
| 2693 | 1700011L03Rik | 0.0005 | No |
| 2694 | Gm44399       | 0.0005 | No |
| 2695 | D930015E06Rik | 0.0005 | No |
| 2696 | Gm18345       | 0.0005 | No |
| 2697 | Gm8143        | 0.0005 | No |
| 2698 | 1700025F22Rik | 0.0005 | No |
| 2699 | Gm10355       | 0.0005 | No |
| 2700 | Gm38177       | 0.0005 | No |
| 2701 | Gm15838       | 0.0005 | No |
| 2702 | Gm45376       | 0.0005 | No |
| 2703 | Gm43448       | 0.0005 | No |
| 2704 | Ear10         | 0.0005 | No |
| 2705 | Gm44076       | 0.0005 | No |
| 2706 | Gm42519       | 0.0005 | No |
| 2707 | 5530400K19Rik | 0.0005 | No |
| 2708 | Olf1093       | 0.0005 | No |
| 2709 | Hyou1         | 0.0005 | No |
| 2710 | 4930448I06Rik | 0.0005 | No |
| 2711 | Gm44847       | 0.0005 | No |

|      |               |        |    |
|------|---------------|--------|----|
| 2712 | Gm6377        | 0.0005 | No |
| 2713 | Gm13180       | 0.0005 | No |
| 2714 | Coa7          | 0.0005 | No |
| 2715 | Gm26541       | 0.0005 | No |
| 2716 | Gm3077        | 0.0005 | No |
| 2717 | RP23-80J7.5   | 0.0005 | No |
| 2718 | Gm5733        | 0.0005 | No |
| 2719 | Gm25099       | 0.0005 | No |
| 2720 | Trbv28        | 0.0005 | No |
| 2721 | Fkbp1a        | 0.0005 | No |
| 2722 | Ifitm7        | 0.0005 | No |
| 2723 | Gm7539        | 0.0005 | No |
| 2724 | Gm23250       | 0.0005 | No |
| 2725 | Gm43206       | 0.0005 | No |
| 2726 | Gm9445        | 0.0005 | No |
| 2727 | Gm11763       | 0.0005 | No |
| 2728 | Gm4872        | 0.0005 | No |
| 2729 | Serpina3h     | 0.0005 | No |
| 2730 | Foxc2         | 0.0005 | No |
| 2731 | Dlx3          | 0.0005 | No |
| 2732 | Efnb3         | 0.0005 | No |
| 2733 | Gm43845       | 0.0005 | No |
| 2734 | 4930504O13Rik | 0.0005 | No |
| 2735 | Dmrt3         | 0.0005 | No |
| 2736 | Trav6-4       | 0.0005 | No |
| 2737 | Gm44322       | 0.0005 | No |
| 2738 | Cd209d        | 0.0005 | No |
| 2739 | Gm26920       | 0.0005 | No |
| 2740 | A4galt        | 0.0005 | No |
| 2741 | Gm24907       | 0.0005 | No |
| 2742 | Mir296        | 0.0005 | No |
| 2743 | Gcgr          | 0.0005 | No |
| 2744 | Oit1          | 0.0005 | No |
| 2745 | 4930478M09Rik | 0.0005 | No |
| 2746 | Pdgfb         | 0.0005 | No |
| 2747 | Tm6sf2        | 0.0005 | No |
| 2748 | Gm43364       | 0.0005 | No |
| 2749 | 4930423M02Rik | 0.0005 | No |
| 2750 | Gm3933        | 0.0005 | No |
| 2751 | Dact2         | 0.0005 | No |
| 2752 | Ublep1        | 0.0005 | No |
| 2753 | Gm11546       | 0.0005 | No |
| 2754 | Gm13452       | 0.0005 | No |
| 2755 | Gm15412       | 0.0005 | No |
| 2756 | Capns1        | 0.0005 | No |
| 2757 | Sucnr1        | 0.0005 | No |

|      |               |        |    |
|------|---------------|--------|----|
| 2758 | Spert         | 0.0005 | No |
| 2759 | Ighv1-52      | 0.0005 | No |
| 2760 | Vmn1r76       | 0.0005 | No |
| 2761 | Mir132        | 0.0005 | No |
| 2762 | Gm5847        | 0.0005 | No |
| 2763 | RP23-57C9.2   | 0.0005 | No |
| 2764 | Gm8018        | 0.0005 | No |
| 2765 | Ly6g5b        | 0.0005 | No |
| 2766 | Rpl28-ps2     | 0.0005 | No |
| 2767 | Gm24765       | 0.0005 | No |
| 2768 | Gm29525       | 0.0005 | No |
| 2769 | Krt33b        | 0.0005 | No |
| 2770 | Ighv5-3       | 0.0005 | No |
| 2771 | 5-Sep         | 0.0005 | No |
| 2772 | Zfpm2         | 0.0005 | No |
| 2773 | Cd300e        | 0.0005 | No |
| 2774 | Fxyd7         | 0.0005 | No |
| 2775 | Trav7-6       | 0.0005 | No |
| 2776 | Trav2         | 0.0005 | No |
| 2777 | Mir3087       | 0.0005 | No |
| 2778 | Cbx3-ps7      | 0.0005 | No |
| 2779 | Gm20485       | 0.0005 | No |
| 2780 | Gm43735       | 0.0005 | No |
| 2781 | Gm20940       | 0.0005 | No |
| 2782 | Acot11        | 0.0005 | No |
| 2783 | Gm37615       | 0.0005 | No |
| 2784 | 1600019K03Rik | 0.0005 | No |
| 2785 | BC028528      | 0.0005 | No |
| 2786 | RP24-170A20.7 | 0.0005 | No |
| 2787 | Gm45528       | 0.0005 | No |
| 2788 | Gm44000       | 0.0005 | No |
| 2789 | Gm8582        | 0.0005 | No |
| 2790 | Gm24449       | 0.0005 | No |
| 2791 | Gm13092       | 0.0005 | No |
| 2792 | Npsr1         | 0.0005 | No |
| 2793 | Gm13108       | 0.0005 | No |
| 2794 | Ror2          | 0.0005 | No |
| 2795 | Hoxd12        | 0.0005 | No |
| 2796 | Gm20121       | 0.0005 | No |
| 2797 | Apol7e        | 0.0005 | No |
| 2798 | Gm44892       | 0.0005 | No |
| 2799 | 1700025A08Rik | 0.0005 | No |
| 2800 | Vmn1r-ps62    | 0.0005 | No |
| 2801 | Gm9109        | 0.0005 | No |
| 2802 | Gm26577       | 0.0005 | No |
| 2803 | Gm37077       | 0.0005 | No |

|      |               |        |    |
|------|---------------|--------|----|
| 2804 | Catsperd      | 0.0005 | No |
| 2805 | Gm25135       | 0.0005 | No |
| 2806 | Gm11359       | 0.0005 | No |
| 2807 | Gm29741       | 0.0005 | No |
| 2808 | C030034L19Rik | 0.0005 | No |
| 2809 | Prr23a1       | 0.0005 | No |
| 2810 | 5730460C07Rik | 0.0005 | No |
| 2811 | Gm28268       | 0.0005 | No |
| 2812 | Sdr16c5       | 0.0005 | No |
| 2813 | Gm43643       | 0.0005 | No |
| 2814 | Dnajc3        | 0.0005 | No |
| 2815 | Ldha          | 0.0005 | No |
| 2816 | Lao1          | 0.0005 | No |
| 2817 | Gm29127       | 0.0005 | No |
| 2818 | Slc35d3       | 0.0005 | No |
| 2819 | Ppp1r14d      | 0.0005 | No |
| 2820 | Gm20646       | 0.0005 | No |
| 2821 | Gm36969       | 0.0005 | No |
| 2822 | Gm37887       | 0.0005 | No |
| 2823 | Rora          | 0.0005 | No |
| 2824 | Gm20281       | 0.0005 | No |
| 2825 | Cma2          | 0.0005 | No |
| 2826 | RP24-250L13.2 | 0.0005 | No |
| 2827 | Taar7f        | 0.0005 | No |
| 2828 | 4930579F01Rik | 0.0005 | No |
| 2829 | Galm          | 0.0005 | No |
| 2830 | Sdc4          | 0.0005 | No |
| 2831 | Gm3727        | 0.0005 | No |
| 2832 | Itln1         | 0.0005 | No |
| 2833 | 1700021L23Rik | 0.0005 | No |
| 2834 | Olf334-ps1    | 0.0005 | No |
| 2835 | 5730559C18Rik | 0.0005 | No |
| 2836 | Gm10024       | 0.0005 | No |
| 2837 | Ii5           | 0.0005 | No |
| 2838 | Zfy2          | 0.0005 | No |
| 2839 | A730035I17Rik | 0.0005 | No |
| 2840 | 4930500L23Rik | 0.0005 | No |
| 2841 | Gm15746       | 0.0005 | No |
| 2842 | Hotair        | 0.0005 | No |
| 2843 | Mup-ps18      | 0.0005 | No |
| 2844 | Gm43053       | 0.0005 | No |
| 2845 | Gm11231       | 0.0005 | No |
| 2846 | Mir7687       | 0.0005 | No |
| 2847 | S100a8        | 0.0005 | No |
| 2848 | Gm23780       | 0.0005 | No |
| 2849 | Igfbp1b       | 0.0005 | No |

|      |              |        |    |
|------|--------------|--------|----|
| 2850 | Gm43094      | 0.0005 | No |
| 2851 | Gm37423      | 0.0005 | No |
| 2852 | Traj2        | 0.0005 | No |
| 2853 | Gm15998      | 0.0005 | No |
| 2854 | Gm14806      | 0.0005 | No |
| 2855 | Olfr180      | 0.0005 | No |
| 2856 | Gm5650       | 0.0005 | No |
| 2857 | Gm11999      | 0.0005 | No |
| 2858 | Oxct2b       | 0.0005 | No |
| 2859 | Gm25132      | 0.0005 | No |
| 2860 | Gm45566      | 0.0005 | No |
| 2861 | Gm11976      | 0.0005 | No |
| 2862 | Myoc         | 0.0005 | No |
| 2863 | Kcns3        | 0.0005 | No |
| 2864 | Gm17042      | 0.0005 | No |
| 2865 | Iqej         | 0.0005 | No |
| 2866 | Lrrc9        | 0.0005 | No |
| 2867 | Ddx43        | 0.0005 | No |
| 2868 | RP23-203D1.4 | 0.0005 | No |
| 2869 | Platr17      | 0.0005 | No |
| 2870 | RP23-68E4.1  | 0.0005 | No |
| 2871 | H2-Pa        | 0.0005 | No |
| 2872 | Gm26396      | 0.0005 | No |
| 2873 | Krt16        | 0.0005 | No |
| 2874 | Gm28214      | 0.0005 | No |
| 2875 | Mia          | 0.0005 | No |
| 2876 | Il31         | 0.0005 | No |
| 2877 | Actrt3       | 0.0005 | No |
| 2878 | Gm42642      | 0.0005 | No |
| 2879 | Gm815        | 0.0005 | No |
| 2880 | Igkv8-19     | 0.0005 | No |
| 2881 | Adipoq       | 0.0005 | No |
| 2882 | Gm32222      | 0.0005 | No |
| 2883 | Gm44657      | 0.0005 | No |
| 2884 | Gm12310      | 0.0005 | No |
| 2885 | Gm44059      | 0.0005 | No |
| 2886 | Lpl          | 0.0005 | No |
| 2887 | Gm37837      | 0.0005 | No |
| 2888 | Calcoco2     | 0.0005 | No |
| 2889 | Gm11706      | 0.0005 | No |
| 2890 | Tspan16      | 0.0005 | No |
| 2891 | Hist1h2af    | 0.0005 | No |
| 2892 | Fam210b      | 0.0005 | No |
| 2893 | Dtymk        | 0.0005 | No |
| 2894 | Olfr1343-ps1 | 0.0005 | No |
| 2895 | Gm24545      | 0.0005 | No |

|      |               |        |    |
|------|---------------|--------|----|
| 2896 | Ace           | 0.0005 | No |
| 2897 | Gm45271       | 0.0005 | No |
| 2898 | Odf311        | 0.0005 | No |
| 2899 | Gm13506       | 0.0005 | No |
| 2900 | Vmn1r33       | 0.0005 | No |
| 2901 | Spty2d1       | 0.0005 | No |
| 2902 | Gm26743       | 0.0005 | No |
| 2903 | Il17rd        | 0.0005 | No |
| 2904 | C1ql3         | 0.0005 | No |
| 2905 | A230065H16Rik | 0.0005 | No |
| 2906 | Gm43700       | 0.0005 | No |
| 2907 | Gm14790       | 0.0005 | No |
| 2908 | Gm24905       | 0.0005 | No |
| 2909 | Vmn2r-ps159   | 0.0005 | No |
| 2910 | Gm5049        | 0.0005 | No |
| 2911 | Klk1b10-ps    | 0.0005 | No |
| 2912 | 1700112H15Rik | 0.0005 | No |
| 2913 | Gm6007        | 0.0005 | No |
| 2914 | Igkv6-32      | 0.0005 | No |
| 2915 | Bcap29        | 0.0005 | No |
| 2916 | Fermt2        | 0.0005 | No |
| 2917 | Gm25227       | 0.0005 | No |
| 2918 | Gm45494       | 0.0005 | No |
| 2919 | Defa24        | 0.0005 | No |
| 2920 | Gm29011       | 0.0005 | No |
| 2921 | Gm19331       | 0.0005 | No |
| 2922 | Ihh           | 0.0005 | No |
| 2923 | Odf1          | 0.0005 | No |
| 2924 | Bmp10         | 0.0005 | No |
| 2925 | Gm21122       | 0.0005 | No |
| 2926 | Il6ra         | 0.0005 | No |
| 2927 | Gm12789       | 0.0005 | No |
| 2928 | Wbp11         | 0.0005 | No |
| 2929 | Gm5771        | 0.0005 | No |
| 2930 | Gm15331       | 0.0005 | No |
| 2931 | Gm17140       | 0.0005 | No |
| 2932 | Gm6423        | 0.0005 | No |
| 2933 | Olf1044       | 0.0005 | No |
| 2934 | Dmrt1i        | 0.0005 | No |
| 2935 | Pdx1          | 0.0005 | No |
| 2936 | Gm22215       | 0.0005 | No |
| 2937 | 5930430L01Rik | 0.0005 | No |
| 2938 | Olf1960       | 0.0005 | No |
| 2939 | Olf1320       | 0.0005 | No |
| 2940 | Gm8297        | 0.0005 | No |
| 2941 | Gm30694       | 0.0005 | No |



|      |               |        |    |
|------|---------------|--------|----|
| 2942 | 8430436N08Rik | 0.0005 | No |
| 2943 | RP23-106G8.4  | 0.0005 | No |
| 2944 | Gm17796       | 0.0005 | No |
| 2945 | Gm34391       | 0.0005 | No |
| 2946 | Slco4c1       | 0.0005 | No |
| 2947 | Platr20       | 0.0005 | No |
| 2948 | Ighv1-57      | 0.0005 | No |
| 2949 | Anxa8         | 0.0005 | No |
| 2950 | Gm4211        | 0.0005 | No |
| 2951 | Drc1          | 0.0005 | No |
| 2952 | Gm26618       | 0.0005 | No |
| 2953 | Gm17076       | 0.0005 | No |
| 2954 | Gm43874       | 0.0005 | No |
| 2955 | Bend5         | 0.0005 | No |
| 2956 | S100a9        | 0.0005 | No |
| 2957 | Ppp1r3d       | 0.0005 | No |
| 2958 | Gm38292       | 0.0005 | No |
| 2959 | 4930571N24Rik | 0.0005 | No |
| 2960 | Phtf1         | 0.0005 | No |
| 2961 | Tbc1d4        | 0.0005 | No |
| 2962 | Gm13944       | 0.0005 | No |
| 2963 | Phyhip        | 0.0005 | No |
| 2964 | Gm43109       | 0.0005 | No |
| 2965 | Mir6400       | 0.0005 | No |
| 2966 | Gm37722       | 0.0005 | No |
| 2967 | 4930528P14Rik | 0.0005 | No |
| 2968 | Gla1          | 0.0005 | No |
| 2969 | Insc          | 0.0005 | No |
| 2970 | Gm11933       | 0.0005 | No |
| 2971 | 4931417E11Rik | 0.0005 | No |
| 2972 | Igkv4-80      | 0.0005 | No |
| 2973 | H2-M10.4      | 0.0005 | No |
| 2974 | Fcho2         | 0.0005 | No |
| 2975 | Gm22884       | 0.0005 | No |
| 2976 | Gm14288       | 0.0005 | No |
| 2977 | Gm8684        | 0.0005 | No |
| 2978 | Disc1         | 0.0005 | No |
| 2979 | Gm14636       | 0.0005 | No |
| 2980 | Mex3a         | 0.0005 | No |
| 2981 | Fmr1os        | 0.0005 | No |
| 2982 | Gm45323       | 0.0005 | No |
| 2983 | Gm22715       | 0.0005 | No |
| 2984 | Rnf133        | 0.0005 | No |
| 2985 | Ubqln3        | 0.0005 | No |
| 2986 | Gm24014       | 0.0005 | No |
| 2987 | 1700113H08Rik | 0.0005 | No |

|      |               |        |    |
|------|---------------|--------|----|
| 2988 | Gm17834       | 0.0005 | No |
| 2989 | Sbp           | 0.0005 | No |
| 2990 | Gm29091       | 0.0005 | No |
| 2991 | Hdgfl1        | 0.0005 | No |
| 2992 | Trav10n       | 0.0005 | No |
| 2993 | Olfr1426      | 0.0005 | No |
| 2994 | Grm4          | 0.0005 | No |
| 2995 | Cdkn1c        | 0.0005 | No |
| 2996 | Gm9434        | 0.0005 | No |
| 2997 | Tcap          | 0.0005 | No |
| 2998 | Gm44926       | 0.0005 | No |
| 2999 | RP24-499N24.6 | 0.0005 | No |
| 3000 | Gm15369       | 0.0005 | No |
| 3001 | A230052G05Rik | 0.0005 | No |
| 3002 | 2310030A07Rik | 0.0004 | No |
| 3003 | Gm45485       | 0.0004 | No |
| 3004 | Slc25a46      | 0.0004 | No |
| 3005 | Gm21614       | 0.0004 | No |
| 3006 | Gm7075        | 0.0004 | No |
| 3007 | Snord61       | 0.0004 | No |
| 3008 | Celsr2        | 0.0004 | No |
| 3009 | Gm44060       | 0.0004 | No |
| 3010 | Fam162b       | 0.0004 | No |
| 3011 | Pcdhga6       | 0.0004 | No |
| 3012 | Slc22a27      | 0.0004 | No |
| 3013 | Gm29778       | 0.0004 | No |
| 3014 | Ighv1-34      | 0.0004 | No |
| 3015 | Gm5400        | 0.0004 | No |
| 3016 | Gm21978       | 0.0004 | No |
| 3017 | A930002H24Rik | 0.0004 | No |
| 3018 | Gm20236       | 0.0004 | No |
| 3019 | Gm24199       | 0.0004 | No |
| 3020 | Gm43742       | 0.0004 | No |
| 3021 | 1700095A21Rik | 0.0004 | No |
| 3022 | Gm28469       | 0.0004 | No |
| 3023 | 2310081O03Rik | 0.0004 | No |
| 3024 | Rad211        | 0.0004 | No |
| 3025 | Mir6929       | 0.0004 | No |
| 3026 | Gm37198       | 0.0004 | No |
| 3027 | Gm37791       | 0.0004 | No |
| 3028 | Dcdc2c        | 0.0004 | No |
| 3029 | Gm42612       | 0.0004 | No |
| 3030 | Gm13974       | 0.0004 | No |
| 3031 | Gm11917       | 0.0004 | No |
| 3032 | Gm45339       | 0.0004 | No |
| 3033 | Plekha4       | 0.0004 | No |

|      |               |        |    |
|------|---------------|--------|----|
| 3034 | Opn4          | 0.0004 | No |
| 3035 | Gm23170       | 0.0004 | No |
| 3036 | Itgb2l        | 0.0004 | No |
| 3037 | RP24-331K7.1  | 0.0004 | No |
| 3038 | Olfr823       | 0.0004 | No |
| 3039 | Gm43784       | 0.0004 | No |
| 3040 | Gm12347       | 0.0004 | No |
| 3041 | Gm37175       | 0.0004 | No |
| 3042 | Rtp1          | 0.0004 | No |
| 3043 | 1700067K01Rik | 0.0004 | No |
| 3044 | RP23-225C11.1 | 0.0004 | No |
| 3045 | Ighv5-9       | 0.0004 | No |
| 3046 | Gm42526       | 0.0004 | No |
| 3047 | Olfr1257      | 0.0004 | No |
| 3048 | Slc22a21      | 0.0004 | No |
| 3049 | Defb28        | 0.0004 | No |
| 3050 | Bves          | 0.0004 | No |
| 3051 | Gm8237        | 0.0004 | No |
| 3052 | Plscr2        | 0.0004 | No |
| 3053 | 4933416E14Rik | 0.0004 | No |
| 3054 | Olfr1425      | 0.0004 | No |
| 3055 | Gm37245       | 0.0004 | No |
| 3056 | Olfr333-ps1   | 0.0004 | No |
| 3057 | Mir6342       | 0.0004 | No |
| 3058 | Gm15234       | 0.0004 | No |
| 3059 | Gm23546       | 0.0004 | No |
| 3060 | Gm16533       | 0.0004 | No |
| 3061 | Gm4234        | 0.0004 | No |
| 3062 | Olfr902       | 0.0004 | No |
| 3063 | 4921529L05Rik | 0.0004 | No |
| 3064 | RP23-456L15.4 | 0.0004 | No |
| 3065 | Gpc5          | 0.0004 | No |
| 3066 | Gm14935       | 0.0004 | No |
| 3067 | Nxph2         | 0.0004 | No |
| 3068 | RP23-346D17.2 | 0.0004 | No |
| 3069 | Gm15792       | 0.0004 | No |
| 3070 | Vmn2r11       | 0.0004 | No |
| 3071 | Traj47        | 0.0004 | No |
| 3072 | Nadsyn1       | 0.0004 | No |
| 3073 | Gm43663       | 0.0004 | No |
| 3074 | Slc38a5       | 0.0004 | No |
| 3075 | Gm43794       | 0.0004 | No |
| 3076 | Ndn           | 0.0004 | No |
| 3077 | Aplp2         | 0.0004 | No |
| 3078 | Gm13168       | 0.0004 | No |
| 3079 | Adcyap1       | 0.0004 | No |

|      |               |        |    |
|------|---------------|--------|----|
| 3080 | Gm13254       | 0.0004 | No |
| 3081 | Gm34816       | 0.0004 | No |
| 3082 | Gm6987        | 0.0004 | No |
| 3083 | Paqr9         | 0.0004 | No |
| 3084 | Gm28112       | 0.0004 | No |
| 3085 | Gm8068        | 0.0004 | No |
| 3086 | Gm12946       | 0.0004 | No |
| 3087 | Gm25843       | 0.0004 | No |
| 3088 | RP23-187D7.1  | 0.0004 | No |
| 3089 | Gm25207       | 0.0004 | No |
| 3090 | D530014G21Rik | 0.0004 | No |
| 3091 | Gm37853       | 0.0004 | No |
| 3092 | Gm37818       | 0.0004 | No |
| 3093 | Gm42633       | 0.0004 | No |
| 3094 | Gm2965        | 0.0004 | No |
| 3095 | Gm16998       | 0.0004 | No |
| 3096 | Erich2        | 0.0004 | No |
| 3097 | Gm13310       | 0.0004 | No |
| 3098 | Ttr           | 0.0004 | No |
| 3099 | Zfp398        | 0.0004 | No |
| 3100 | Gm37504       | 0.0004 | No |
| 3101 | Gm35048       | 0.0004 | No |
| 3102 | Psm6          | 0.0004 | No |
| 3103 | Tdrp          | 0.0004 | No |
| 3104 | Lor           | 0.0004 | No |
| 3105 | Gm43285       | 0.0004 | No |
| 3106 | 4930488N24Rik | 0.0004 | No |
| 3107 | Prme          | 0.0004 | No |
| 3108 | Gm21698       | 0.0004 | No |
| 3109 | Gm24555       | 0.0004 | No |
| 3110 | Gm16554       | 0.0004 | No |
| 3111 | Nr2f6         | 0.0004 | No |
| 3112 | RP23-64N1.2   | 0.0004 | No |
| 3113 | Gm37941       | 0.0004 | No |
| 3114 | Endou         | 0.0004 | No |
| 3115 | Gm38283       | 0.0004 | No |
| 3116 | Pmepalos      | 0.0004 | No |
| 3117 | Gm28730       | 0.0004 | No |
| 3118 | Gm11851       | 0.0004 | No |
| 3119 | Gm15785       | 0.0004 | No |
| 3120 | Gm45124       | 0.0004 | No |
| 3121 | Etnk2         | 0.0004 | No |
| 3122 | Gm43209       | 0.0004 | No |
| 3123 | Olfir971      | 0.0004 | No |
| 3124 | Pcdhb5        | 0.0004 | No |
| 3125 | Gm8247        | 0.0004 | No |

|      |               |        |    |
|------|---------------|--------|----|
| 3126 | Gm23721       | 0.0004 | No |
| 3127 | Sh3pxd2a      | 0.0004 | No |
| 3128 | Vrtn          | 0.0004 | No |
| 3129 | Obox4-ps1     | 0.0004 | No |
| 3130 | Gm11844       | 0.0004 | No |
| 3131 | Gm44064       | 0.0004 | No |
| 3132 | Gm43504       | 0.0004 | No |
| 3133 | Pgm5          | 0.0004 | No |
| 3134 | Ccl24         | 0.0004 | No |
| 3135 | 1700029J03Rik | 0.0004 | No |
| 3136 | Gm14521       | 0.0004 | No |
| 3137 | Trim38        | 0.0004 | No |
| 3138 | Olf420        | 0.0004 | No |
| 3139 | Olf918        | 0.0004 | No |
| 3140 | Gm37307       | 0.0004 | No |
| 3141 | Gm13867       | 0.0004 | No |
| 3142 | Mtcl1         | 0.0004 | No |
| 3143 | Pcdhb2        | 0.0004 | No |
| 3144 | 9030619P08Rik | 0.0004 | No |
| 3145 | Olf427        | 0.0004 | No |
| 3146 | Clec7a        | 0.0004 | No |
| 3147 | RP23-442M18.5 | 0.0004 | No |
| 3148 | Gm14491       | 0.0004 | No |
| 3149 | 8030423J24Rik | 0.0004 | No |
| 3150 | Gm24399       | 0.0004 | No |
| 3151 | Traj15        | 0.0004 | No |
| 3152 | Pcna-ps1      | 0.0004 | No |
| 3153 | Gm28856       | 0.0004 | No |
| 3154 | Mup21         | 0.0004 | No |
| 3155 | Klhl13        | 0.0004 | No |
| 3156 | 4930421P07Rik | 0.0004 | No |
| 3157 | RP23-416I23.5 | 0.0004 | No |
| 3158 | Gm15036       | 0.0004 | No |
| 3159 | Gm44708       | 0.0004 | No |
| 3160 | Gm29649       | 0.0004 | No |
| 3161 | Gm37907       | 0.0004 | No |
| 3162 | Mir693        | 0.0004 | No |
| 3163 | Klk1b15-ps    | 0.0004 | No |
| 3164 | AL626808.1    | 0.0004 | No |
| 3165 | Cby3          | 0.0004 | No |
| 3166 | Mt3           | 0.0004 | No |
| 3167 | Gm42464       | 0.0004 | No |
| 3168 | Gm13544       | 0.0004 | No |
| 3169 | Mir27b        | 0.0004 | No |
| 3170 | Gm16043       | 0.0004 | No |
| 3171 | Gm7237        | 0.0004 | No |

|      |               |        |    |
|------|---------------|--------|----|
| 3172 | Gm24407       | 0.0004 | No |
| 3173 | RP23-288O12.1 | 0.0004 | No |
| 3174 | Ackr2         | 0.0004 | No |
| 3175 | Krtap1-4      | 0.0004 | No |
| 3176 | Gm22960       | 0.0004 | No |
| 3177 | Oosp2         | 0.0004 | No |
| 3178 | Gm37894       | 0.0004 | No |
| 3179 | Traj42        | 0.0004 | No |
| 3180 | Gm44722       | 0.0004 | No |
| 3181 | Ankrd34c      | 0.0004 | No |
| 3182 | RP24-84E18.1  | 0.0004 | No |
| 3183 | Gm43399       | 0.0004 | No |
| 3184 | Gm45042       | 0.0004 | No |
| 3185 | Gm14042       | 0.0004 | No |
| 3186 | Plekhf1       | 0.0004 | No |
| 3187 | Gm37737       | 0.0004 | No |
| 3188 | 2310007B03Rik | 0.0004 | No |
| 3189 | 4932422M17Rik | 0.0004 | No |
| 3190 | Gm37492       | 0.0004 | No |
| 3191 | Gm7897        | 0.0004 | No |
| 3192 | Chn2          | 0.0004 | No |
| 3193 | Exoc7         | 0.0004 | No |
| 3194 | 9030622O22Rik | 0.0004 | No |
| 3195 | Hoxd11        | 0.0004 | No |
| 3196 | Alox12e       | 0.0004 | No |
| 3197 | Gm4248        | 0.0004 | No |
| 3198 | Asxl1         | 0.0004 | No |
| 3199 | Gm43351       | 0.0004 | No |
| 3200 | Hist1h3b      | 0.0004 | No |
| 3201 | Defb23        | 0.0004 | No |
| 3202 | Gm28942       | 0.0004 | No |
| 3203 | Serpib2       | 0.0004 | No |
| 3204 | Gm37323       | 0.0004 | No |
| 3205 | Gm904         | 0.0004 | No |
| 3206 | Dbn1          | 0.0004 | No |
| 3207 | Olf672        | 0.0004 | No |
| 3208 | Gpr135        | 0.0004 | No |
| 3209 | Ugt1a2        | 0.0004 | No |
| 3210 | Gm8321        | 0.0004 | No |
| 3211 | Muc1          | 0.0004 | No |
| 3212 | Slc7a9        | 0.0004 | No |
| 3213 | Gm11446       | 0.0004 | No |
| 3214 | Olf1162       | 0.0004 | No |
| 3215 | Gm14488       | 0.0004 | No |
| 3216 | Zbed4-ps3     | 0.0004 | No |
| 3217 | Gm9115        | 0.0004 | No |

|      |               |        |    |
|------|---------------|--------|----|
| 3218 | 9630028H03Rik | 0.0004 | No |
| 3219 | Gm37148       | 0.0004 | No |
| 3220 | Tlr1          | 0.0004 | No |
| 3221 | Olf2l1-ps1    | 0.0004 | No |
| 3222 | Nkx2-2        | 0.0004 | No |
| 3223 | Mir6932       | 0.0004 | No |
| 3224 | Dio1          | 0.0004 | No |
| 3225 | Gm42746       | 0.0004 | No |
| 3226 | Igkv3-12      | 0.0004 | No |
| 3227 | RP24-63K13.5  | 0.0004 | No |
| 3228 | Gm43299       | 0.0004 | No |
| 3229 | Gm2053        | 0.0004 | No |
| 3230 | Gm43277       | 0.0004 | No |
| 3231 | Mbd3l1        | 0.0004 | No |
| 3232 | Gm37524       | 0.0004 | No |
| 3233 | Gm27211       | 0.0004 | No |
| 3234 | 4933402D24Rik | 0.0004 | No |
| 3235 | Olf2l1        | 0.0004 | No |
| 3236 | Gm21168       | 0.0004 | No |
| 3237 | Chrna4        | 0.0004 | No |
| 3238 | Pnm1l         | 0.0004 | No |
| 3239 | Gm42569       | 0.0004 | No |
| 3240 | Gm22208       | 0.0004 | No |
| 3241 | Gm44360       | 0.0004 | No |
| 3242 | Gm33994       | 0.0004 | No |
| 3243 | Ufsp1         | 0.0004 | No |
| 3244 | Mir27a        | 0.0004 | No |
| 3245 | Gm42545       | 0.0004 | No |
| 3246 | Pla2g7        | 0.0004 | No |
| 3247 | Gm19908       | 0.0004 | No |
| 3248 | Vmn1r-ps104   | 0.0004 | No |
| 3249 | Krtap3-1      | 0.0004 | No |
| 3250 | Olf2l1        | 0.0004 | No |
| 3251 | Creb3l3       | 0.0004 | No |
| 3252 | BC039966      | 0.0004 | No |
| 3253 | Gm8775        | 0.0004 | No |
| 3254 | Ppp2r2cos     | 0.0004 | No |
| 3255 | Tmem252       | 0.0004 | No |
| 3256 | Panct2        | 0.0004 | No |
| 3257 | Mfsd4b1       | 0.0004 | No |
| 3258 | C230004F18Rik | 0.0004 | No |
| 3259 | Gm44680       | 0.0004 | No |
| 3260 | Kcnj1         | 0.0004 | No |
| 3261 | Gm45127       | 0.0004 | No |
| 3262 | Tmbim1        | 0.0004 | No |
| 3263 | Scgb2b21      | 0.0004 | No |

|      |               |        |    |
|------|---------------|--------|----|
| 3264 | C430049B03Rik | 0.0004 | No |
| 3265 | Gm38126       | 0.0004 | No |
| 3266 | Gm11775       | 0.0004 | No |
| 3267 | Gm23324       | 0.0004 | No |
| 3268 | Ptgs1         | 0.0004 | No |
| 3269 | RP24-262P14.4 | 0.0004 | No |
| 3270 | Gm14877       | 0.0004 | No |
| 3271 | Rorb          | 0.0004 | No |
| 3272 | Gm26655       | 0.0004 | No |
| 3273 | Gm28219       | 0.0004 | No |
| 3274 | Gm3828        | 0.0004 | No |
| 3275 | Rhox11        | 0.0004 | No |
| 3276 | Gm5682        | 0.0004 | No |
| 3277 | Olf15         | 0.0004 | No |
| 3278 | Tas2r107      | 0.0004 | No |
| 3279 | Gm22          | 0.0004 | No |
| 3280 | Gm28410       | 0.0004 | No |
| 3281 | Snord15a      | 0.0004 | No |
| 3282 | 4930557B06Rik | 0.0004 | No |
| 3283 | Olf1702       | 0.0004 | No |
| 3284 | Mir7116       | 0.0004 | No |
| 3285 | RP23-262P15.4 | 0.0004 | No |
| 3286 | RP23-142F22.2 | 0.0004 | No |
| 3287 | Olf1829       | 0.0004 | No |
| 3288 | Tnmd          | 0.0004 | No |
| 3289 | Fam19a3       | 0.0004 | No |
| 3290 | Kcnd3os       | 0.0004 | No |
| 3291 | Vmn1r69       | 0.0004 | No |
| 3292 | Gm11982       | 0.0004 | No |
| 3293 | Igfbp6        | 0.0004 | No |
| 3294 | Vmn1r228      | 0.0004 | No |
| 3295 | Gm1587        | 0.0004 | No |
| 3296 | Gm24720       | 0.0004 | No |
| 3297 | Ric3          | 0.0004 | No |
| 3298 | Pinc          | 0.0004 | No |
| 3299 | Gm43709       | 0.0004 | No |
| 3300 | Gm24805       | 0.0004 | No |
| 3301 | 1700080G11Rik | 0.0004 | No |
| 3302 | Nr4a2         | 0.0004 | No |
| 3303 | Rpl7a-ps9     | 0.0004 | No |
| 3304 | Olf1343-ps1   | 0.0004 | No |
| 3305 | F10           | 0.0004 | No |
| 3306 | RP23-18M12.2  | 0.0004 | No |
| 3307 | Gm13062       | 0.0004 | No |
| 3308 | Gm42428       | 0.0004 | No |
| 3309 | RP23-319C8.5  | 0.0004 | No |



|      |               |        |    |
|------|---------------|--------|----|
| 3310 | Slc16a12      | 0.0004 | No |
| 3311 | Zfp993        | 0.0004 | No |
| 3312 | Phospho1      | 0.0004 | No |
| 3313 | Mir8110       | 0.0004 | No |
| 3314 | Gm42761       | 0.0004 | No |
| 3315 | Ighv7-2       | 0.0004 | No |
| 3316 | Olfir499-ps1  | 0.0004 | No |
| 3317 | Gm9771        | 0.0004 | No |
| 3318 | Gm27227       | 0.0004 | No |
| 3319 | Gm25533       | 0.0004 | No |
| 3320 | Lin9          | 0.0004 | No |
| 3321 | Gm45596       | 0.0004 | No |
| 3322 | 4933436E23Rik | 0.0004 | No |
| 3323 | 5430430B14Rik | 0.0004 | No |
| 3324 | Hsh2d         | 0.0004 | No |
| 3325 | Gm43423       | 0.0004 | No |
| 3326 | Kank4os       | 0.0004 | No |
| 3327 | Gm44570       | 0.0004 | No |
| 3328 | Pex2          | 0.0004 | No |
| 3329 | Zfp980        | 0.0004 | No |
| 3330 | Gm20465       | 0.0004 | No |
| 3331 | RP23-11B13.1  | 0.0004 | No |
| 3332 | Clvs1         | 0.0004 | No |
| 3333 | Gm30341       | 0.0004 | No |
| 3334 | Gm15499       | 0.0004 | No |
| 3335 | Tyr           | 0.0004 | No |
| 3336 | Gm17791       | 0.0004 | No |
| 3337 | Gm13976       | 0.0004 | No |
| 3338 | Mir133a-1     | 0.0004 | No |
| 3339 | Gm37427       | 0.0004 | No |
| 3340 | Fabp1         | 0.0004 | No |
| 3341 | Igkv8-18      | 0.0004 | No |
| 3342 | Gm22592       | 0.0004 | No |
| 3343 | Pm20d2        | 0.0004 | No |
| 3344 | Ear2          | 0.0004 | No |
| 3345 | Gm11418       | 0.0004 | No |
| 3346 | RP23-459B8.1  | 0.0004 | No |
| 3347 | Gm13110       | 0.0004 | No |
| 3348 | Gm43147       | 0.0004 | No |
| 3349 | Hyal5         | 0.0004 | No |
| 3350 | Hey1          | 0.0004 | No |
| 3351 | Epb4111       | 0.0004 | No |
| 3352 | RP24-423G4.2  | 0.0004 | No |
| 3353 | Slamf6        | 0.0004 | No |
| 3354 | Galc          | 0.0004 | No |
| 3355 | Gm3943        | 0.0004 | No |

|      |               |        |    |
|------|---------------|--------|----|
| 3356 | Art4          | 0.0004 | No |
| 3357 | Gm37352       | 0.0004 | No |
| 3358 | Gm37068       | 0.0004 | No |
| 3359 | Gm28649       | 0.0004 | No |
| 3360 | Klh13         | 0.0004 | No |
| 3361 | Gm23718       | 0.0004 | No |
| 3362 | Erich2os      | 0.0004 | No |
| 3363 | Gm8826        | 0.0004 | No |
| 3364 | Eml4          | 0.0004 | No |
| 3365 | Tcof1         | 0.0004 | No |
| 3366 | Gm24859       | 0.0004 | No |
| 3367 | Mboat1        | 0.0004 | No |
| 3368 | 4921513D11Rik | 0.0004 | No |
| 3369 | Gm16008       | 0.0004 | No |
| 3370 | Ace2          | 0.0004 | No |
| 3371 | Inpp5b        | 0.0004 | No |
| 3372 | Kif2b         | 0.0004 | No |
| 3373 | Gm42837       | 0.0004 | No |
| 3374 | Lrrc30        | 0.0004 | No |
| 3375 | Cry1          | 0.0004 | No |
| 3376 | Mir6959       | 0.0004 | No |
| 3377 | Gm42458       | 0.0004 | No |
| 3378 | 9130409J20Rik | 0.0004 | No |
| 3379 | Il22ra2       | 0.0004 | No |
| 3380 | Gm15218       | 0.0004 | No |
| 3381 | Olf1076       | 0.0004 | No |
| 3382 | Gm28050       | 0.0004 | No |
| 3383 | 9430069I07Rik | 0.0004 | No |
| 3384 | A930028O11Rik | 0.0004 | No |
| 3385 | Gm21759       | 0.0004 | No |
| 3386 | Gm20716       | 0.0004 | No |
| 3387 | Ranbp2-ps11   | 0.0004 | No |
| 3388 | Olf1974       | 0.0004 | No |
| 3389 | RP23-130L13.1 | 0.0004 | No |
| 3390 | Olf1789       | 0.0004 | No |
| 3391 | Fgf15         | 0.0004 | No |
| 3392 | Gm18522       | 0.0004 | No |
| 3393 | Txndc2        | 0.0004 | No |
| 3394 | Gm10558       | 0.0004 | No |
| 3395 | C4b           | 0.0004 | No |
| 3396 | Gm7726        | 0.0004 | No |
| 3397 | Cyp2c66       | 0.0004 | No |
| 3398 | Kcnk3         | 0.0004 | No |
| 3399 | Olf195        | 0.0004 | No |
| 3400 | Gm12400       | 0.0004 | No |
| 3401 | Gm45332       | 0.0004 | No |

|      |               |        |    |
|------|---------------|--------|----|
| 3402 | Vmn1r-ps10    | 0.0004 | No |
| 3403 | Gm14393       | 0.0004 | No |
| 3404 | Gm19185       | 0.0004 | No |
| 3405 | Gm6970        | 0.0004 | No |
| 3406 | Mir6372       | 0.0004 | No |
| 3407 | Mir5616       | 0.0004 | No |
| 3408 | Gm6047        | 0.0004 | No |
| 3409 | Gm24131       | 0.0004 | No |
| 3410 | Gm12331       | 0.0004 | No |
| 3411 | Gm16069       | 0.0004 | No |
| 3412 | Gm45247       | 0.0004 | No |
| 3413 | Igkv13-74-1   | 0.0004 | No |
| 3414 | Spam1         | 0.0004 | No |
| 3415 | Rnu3a         | 0.0004 | No |
| 3416 | Gm14182       | 0.0004 | No |
| 3417 | Gm44784       | 0.0004 | No |
| 3418 | Igkv6-13      | 0.0004 | No |
| 3419 | Gjb3          | 0.0004 | No |
| 3420 | Zfp354c       | 0.0004 | No |
| 3421 | Pcsk2os1      | 0.0004 | No |
| 3422 | Gm20620       | 0.0004 | No |
| 3423 | RP23-91H23.4  | 0.0004 | No |
| 3424 | Rasgrp1       | 0.0004 | No |
| 3425 | Gm44008       | 0.0004 | No |
| 3426 | Tmem30a       | 0.0004 | No |
| 3427 | Gm9889        | 0.0004 | No |
| 3428 | Cyp2c55       | 0.0004 | No |
| 3429 | Gm5793        | 0.0004 | No |
| 3430 | Gm14129       | 0.0004 | No |
| 3431 | Gm5334        | 0.0004 | No |
| 3432 | Mcomp1        | 0.0004 | No |
| 3433 | Gm43371       | 0.0004 | No |
| 3434 | A330087D11Rik | 0.0004 | No |
| 3435 | Lsm6          | 0.0004 | No |
| 3436 | Gm37228       | 0.0004 | No |
| 3437 | Otud6a        | 0.0004 | No |
| 3438 | Olf1017-ps1   | 0.0004 | No |
| 3439 | Spint5        | 0.0004 | No |
| 3440 | Gm45297       | 0.0004 | No |
| 3441 | Pilrb2        | 0.0004 | No |
| 3442 | Slc22a16      | 0.0004 | No |
| 3443 | A930005G22Rik | 0.0004 | No |
| 3444 | Hhex          | 0.0004 | No |
| 3445 | Gm8091        | 0.0004 | No |
| 3446 | RP23-82F10.5  | 0.0004 | No |
| 3447 | Gm43239       | 0.0004 | No |

|      |               |        |    |
|------|---------------|--------|----|
| 3448 | Shc2          | 0.0004 | No |
| 3449 | 4930486I03Rik | 0.0004 | No |
| 3450 | Olfr490       | 0.0004 | No |
| 3451 | Gm26600       | 0.0004 | No |
| 3452 | Mir7002       | 0.0004 | No |
| 3453 | Gm15520       | 0.0004 | No |
| 3454 | Uts2          | 0.0004 | No |
| 3455 | Cyp2b10       | 0.0004 | No |
| 3456 | 9530002B09Rik | 0.0004 | No |
| 3457 | Mrpl54        | 0.0004 | No |
| 3458 | Olfr1419      | 0.0004 | No |
| 3459 | Gm15287       | 0.0004 | No |
| 3460 | Gm42844       | 0.0004 | No |
| 3461 | Ccdc113       | 0.0004 | No |
| 3462 | Rpl23a-ps4    | 0.0004 | No |
| 3463 | Olfr197       | 0.0004 | No |
| 3464 | Ugt1a6b       | 0.0004 | No |
| 3465 | Gm42925       | 0.0004 | No |
| 3466 | Gm16236       | 0.0004 | No |
| 3467 | Ms4a15        | 0.0004 | No |
| 3468 | 1700013N06Rik | 0.0004 | No |
| 3469 | Vmn1r75       | 0.0004 | No |
| 3470 | Gm14661       | 0.0004 | No |
| 3471 | Gm25113       | 0.0004 | No |
| 3472 | Traj14        | 0.0004 | No |
| 3473 | Gfral         | 0.0004 | No |
| 3474 | Gm44811       | 0.0004 | No |
| 3475 | Serpinb9d     | 0.0004 | No |
| 3476 | 1700025L06Rik | 0.0004 | No |
| 3477 | Olfr405-ps1   | 0.0004 | No |
| 3478 | Leng9         | 0.0004 | No |
| 3479 | Chrnd         | 0.0004 | No |
| 3480 | Olfr983       | 0.0004 | No |
| 3481 | Dmrt1         | 0.0004 | No |
| 3482 | Pcdhb15       | 0.0004 | No |
| 3483 | Gm22063       | 0.0004 | No |
| 3484 | 4921511H03Rik | 0.0004 | No |
| 3485 | Gm22769       | 0.0004 | No |
| 3486 | Gm6264        | 0.0004 | No |
| 3487 | Gm5110        | 0.0004 | No |
| 3488 | Smarce1-ps1   | 0.0004 | No |
| 3489 | Gm38113       | 0.0004 | No |
| 3490 | Pcgf2         | 0.0004 | No |
| 3491 | Gm16751       | 0.0004 | No |
| 3492 | Klra8         | 0.0004 | No |
| 3493 | Gnao1         | 0.0004 | No |

|      |               |        |    |
|------|---------------|--------|----|
| 3494 | Igkv3-7       | 0.0004 | No |
| 3495 | Oas1h         | 0.0004 | No |
| 3496 | Gm20901       | 0.0004 | No |
| 3497 | Olf1r533      | 0.0004 | No |
| 3498 | Snora21       | 0.0004 | No |
| 3499 | Gm34728       | 0.0004 | No |
| 3500 | Gm11419       | 0.0004 | No |
| 3501 | RP23-141G9.2  | 0.0004 | No |
| 3502 | 4931428L18Rik | 0.0004 | No |
| 3503 | Gm11540       | 0.0004 | No |
| 3504 | Gm7489        | 0.0004 | No |
| 3505 | Lilra6        | 0.0004 | No |
| 3506 | Gm25125       | 0.0004 | No |
| 3507 | Rps13-ps8     | 0.0004 | No |
| 3508 | Mir6984       | 0.0004 | No |
| 3509 | Gm26705       | 0.0004 | No |
| 3510 | Il17re        | 0.0004 | No |
| 3511 | Vrk1          | 0.0004 | No |
| 3512 | Gm43139       | 0.0004 | No |
| 3513 | Mir449b       | 0.0004 | No |
| 3514 | 2210019I11Rik | 0.0004 | No |
| 3515 | Gm12200       | 0.0004 | No |
| 3516 | Rdh18-ps      | 0.0004 | No |
| 3517 | Ccdc172       | 0.0004 | No |
| 3518 | Ighd4-1       | 0.0004 | No |
| 3519 | Clca1         | 0.0004 | No |
| 3520 | Gm7665        | 0.0004 | No |
| 3521 | Gm29592       | 0.0004 | No |
| 3522 | Il24          | 0.0004 | No |
| 3523 | Olf1r20       | 0.0004 | No |
| 3524 | Gm11460       | 0.0004 | No |
| 3525 | RP24-70C15.1  | 0.0004 | No |
| 3526 | Gm6141        | 0.0004 | No |
| 3527 | 2310074N15Rik | 0.0004 | No |
| 3528 | 1700006J14Rik | 0.0004 | No |
| 3529 | Defb3         | 0.0004 | No |
| 3530 | Zfp641        | 0.0004 | No |
| 3531 | Ly6c1         | 0.0004 | No |
| 3532 | Gm10610       | 0.0004 | No |
| 3533 | Gm27156       | 0.0004 | No |
| 3534 | Trmp1         | 0.0004 | No |
| 3535 | Pcdhgb2       | 0.0004 | No |
| 3536 | Pramef12      | 0.0004 | No |
| 3537 | Gm12656       | 0.0004 | No |
| 3538 | Rnase2b       | 0.0004 | No |
| 3539 | 4933406L23Rik | 0.0004 | No |

|      |               |        |    |
|------|---------------|--------|----|
| 3540 | Gm4262        | 0.0004 | No |
| 3541 | 4930470B04Rik | 0.0004 | No |
| 3542 | Spdef         | 0.0004 | No |
| 3543 | Gm9712        | 0.0004 | No |
| 3544 | Zfp131        | 0.0004 | No |
| 3545 | Gm15494       | 0.0004 | No |
| 3546 | Gm24185       | 0.0004 | No |
| 3547 | RP24-212B22.2 | 0.0004 | No |
| 3548 | Gm44865       | 0.0004 | No |
| 3549 | Gm9817        | 0.0004 | No |
| 3550 | Gm4753        | 0.0004 | No |
| 3551 | RP23-218O15.1 | 0.0004 | No |
| 3552 | RP23-149M7.1  | 0.0004 | No |
| 3553 | Mir3471-1     | 0.0004 | No |
| 3554 | Pnpla1        | 0.0004 | No |
| 3555 | Nmrk2         | 0.0004 | No |
| 3556 | Gm37752       | 0.0004 | No |
| 3557 | Gm16086       | 0.0004 | No |
| 3558 | Gm16193       | 0.0004 | No |
| 3559 | Gm26131       | 0.0004 | No |
| 3560 | Gm37526       | 0.0004 | No |
| 3561 | 4930420N18Rik | 0.0004 | No |
| 3562 | Armc12        | 0.0004 | No |
| 3563 | Olfir263      | 0.0004 | No |
| 3564 | 4933434M16Rik | 0.0004 | No |
| 3565 | RP24-122E11.4 | 0.0004 | No |
| 3566 | 1700019P21Rik | 0.0004 | No |
| 3567 | Gm42999       | 0.0004 | No |
| 3568 | Gm15918       | 0.0004 | No |
| 3569 | Speer4a       | 0.0004 | No |
| 3570 | Gm6161        | 0.0004 | No |
| 3571 | Gm6882        | 0.0004 | No |
| 3572 | Cxcl1         | 0.0004 | No |
| 3573 | Chaf1b        | 0.0004 | No |
| 3574 | Zscan4c       | 0.0004 | No |
| 3575 | Gm22372       | 0.0004 | No |
| 3576 | Mir381        | 0.0004 | No |
| 3577 | Gm18952       | 0.0004 | No |
| 3578 | Olfir926      | 0.0004 | No |
| 3579 | Gm7219        | 0.0004 | No |
| 3580 | Gm45078       | 0.0004 | No |
| 3581 | Pon3          | 0.0004 | No |
| 3582 | Olfir133      | 0.0004 | No |
| 3583 | Usp26         | 0.0004 | No |
| 3584 | Slc25a43      | 0.0004 | No |
| 3585 | Gm44655       | 0.0004 | No |

|      |               |        |    |
|------|---------------|--------|----|
| 3586 | Gm44398       | 0.0004 | No |
| 3587 | Gm43947       | 0.0004 | No |
| 3588 | Fkbp14        | 0.0004 | No |
| 3589 | 1700041C23Rik | 0.0004 | No |
| 3590 | Gm20767       | 0.0004 | No |
| 3591 | Gm21731       | 0.0004 | No |
| 3592 | Gm27580       | 0.0004 | No |
| 3593 | Ch25h         | 0.0004 | No |
| 3594 | Gm12830       | 0.0004 | No |
| 3595 | Klra1         | 0.0004 | No |
| 3596 | Ighv1-41      | 0.0004 | No |
| 3597 | Sert1         | 0.0004 | No |
| 3598 | Gm28083       | 0.0004 | No |
| 3599 | AU023070      | 0.0004 | No |
| 3600 | Tlr13         | 0.0004 | No |
| 3601 | Gm7329        | 0.0004 | No |
| 3602 | Gm8823        | 0.0004 | No |
| 3603 | Gm18698       | 0.0004 | No |
| 3604 | Mip           | 0.0004 | No |
| 3605 | Olfr1535      | 0.0004 | No |
| 3606 | Gm27242       | 0.0004 | No |
| 3607 | Nbeal2        | 0.0004 | No |
| 3608 | Gm15293       | 0.0004 | No |
| 3609 | Olfr982       | 0.0004 | No |
| 3610 | Olfr1290      | 0.0004 | No |
| 3611 | Camp          | 0.0004 | No |
| 3612 | Fibin         | 0.0004 | No |
| 3613 | Gm22152       | 0.0004 | No |
| 3614 | Igkv4-50      | 0.0004 | No |
| 3615 | Olfr1341      | 0.0004 | No |
| 3616 | RP23-255F14.8 | 0.0004 | No |
| 3617 | Gm38125       | 0.0004 | No |
| 3618 | Slc7a5        | 0.0004 | No |
| 3619 | Gm23377       | 0.0004 | No |
| 3620 | Olfr1438-ps1  | 0.0004 | No |
| 3621 | Gm16155       | 0.0004 | No |
| 3622 | Gm45005       | 0.0004 | No |
| 3623 | W11-1735G24.1 | 0.0004 | No |
| 3624 | Crisp4        | 0.0004 | No |
| 3625 | Mir6920       | 0.0004 | No |
| 3626 | Pcdha8        | 0.0004 | No |
| 3627 | Ighv1-36      | 0.0004 | No |
| 3628 | Olfr524       | 0.0004 | No |
| 3629 | Olfr775       | 0.0004 | No |
| 3630 | Obox4-ps36    | 0.0004 | No |
| 3631 | Gm25369       | 0.0004 | No |

|      |           |        |    |
|------|-----------|--------|----|
| 3632 | Gm15056   | 0.0004 | No |
| 3633 | Gm43304   | 0.0004 | No |
| 3634 | Prr36     | 0.0004 | No |
| 3635 | Gm25550   | 0.0004 | No |
| 3636 | Gm43999   | 0.0004 | No |
| 3637 | Gm22813   | 0.0004 | No |
| 3638 | Kcna10    | 0.0004 | No |
| 3639 | Gm22947   | 0.0004 | No |
| 3640 | Gm15742   | 0.0004 | No |
| 3641 | Pkd2l1    | 0.0004 | No |
| 3642 | Irx2      | 0.0004 | No |
| 3643 | Gm6134    | 0.0004 | No |
| 3644 | Ppp3ca    | 0.0004 | No |
| 3645 | Vmn2r75   | 0.0004 | No |
| 3646 | Myl9      | 0.0004 | No |
| 3647 | I118r1    | 0.0004 | No |
| 3648 | Gm43297   | 0.0004 | No |
| 3649 | Gm9870    | 0.0004 | No |
| 3650 | Gm13903   | 0.0004 | No |
| 3651 | Igkv4-83  | 0.0004 | No |
| 3652 | Prl7a1    | 0.0004 | No |
| 3653 | Ints8     | 0.0004 | No |
| 3654 | Gm20691   | 0.0004 | No |
| 3655 | Secisbp21 | 0.0004 | No |
| 3656 | Olf1277   | 0.0004 | No |
| 3657 | Myl3      | 0.0004 | No |
| 3658 | Gm27987   | 0.0004 | No |
| 3659 | Snai2     | 0.0004 | No |
| 3660 | Trav7n-4  | 0.0004 | No |
| 3661 | Gm6227    | 0.0004 | No |
| 3662 | Gtsf11    | 0.0004 | No |
| 3663 | Mir3535   | 0.0004 | No |
| 3664 | Cldn17    | 0.0004 | No |
| 3665 | Ighv2-8   | 0.0004 | No |
| 3666 | Sstr5     | 0.0004 | No |
| 3667 | Vmn1r25   | 0.0004 | No |
| 3668 | Gm23967   | 0.0004 | No |
| 3669 | Pramef17  | 0.0004 | No |
| 3670 | Gm45654   | 0.0004 | No |
| 3671 | Gm29334   | 0.0004 | No |
| 3672 | Gnai1     | 0.0004 | No |
| 3673 | Olf1129   | 0.0004 | No |
| 3674 | Gm33142   | 0.0004 | No |
| 3675 | Clps      | 0.0004 | No |
| 3676 | Gm12739   | 0.0004 | No |
| 3677 | Gm43903   | 0.0004 | No |



|      |               |        |    |
|------|---------------|--------|----|
| 3678 | RP24-365N15.4 | 0.0004 | No |
| 3679 | Gm24947       | 0.0004 | No |
| 3680 | Olfr1544-ps1  | 0.0004 | No |
| 3681 | Npy6r         | 0.0004 | No |
| 3682 | RP23-176M22.7 | 0.0004 | No |
| 3683 | Gm22867       | 0.0004 | No |
| 3684 | Gm18781       | 0.0004 | No |
| 3685 | Ighv1-35      | 0.0004 | No |
| 3686 | Pmp2          | 0.0004 | No |
| 3687 | RP23-217J11.6 | 0.0004 | No |
| 3688 | 1700112J05Rik | 0.0004 | No |
| 3689 | RP23-384F19.1 | 0.0004 | No |
| 3690 | Gm37243       | 0.0004 | No |
| 3691 | Gm13412       | 0.0004 | No |
| 3692 | Gm45155       | 0.0004 | No |
| 3693 | Gm12825       | 0.0004 | No |
| 3694 | Gm13313       | 0.0004 | No |
| 3695 | Gm14028       | 0.0004 | No |
| 3696 | Tcrg-V5       | 0.0004 | No |
| 3697 | Gm12629       | 0.0004 | No |
| 3698 | BC053393      | 0.0004 | No |
| 3699 | Dapl1         | 0.0004 | No |
| 3700 | Gm8715        | 0.0004 | No |
| 3701 | Psmc5         | 0.0004 | No |
| 3702 | Mir7683       | 0.0004 | No |
| 3703 | Gm15926       | 0.0004 | No |
| 3704 | Adam2         | 0.0004 | No |
| 3705 | Gm37720       | 0.0004 | No |
| 3706 | Gm43896       | 0.0004 | No |
| 3707 | 4833421K07Rik | 0.0004 | No |
| 3708 | AU022133      | 0.0004 | No |
| 3709 | Gm38111       | 0.0004 | No |
| 3710 | Gm3187        | 0.0004 | No |
| 3711 | Olfr683       | 0.0004 | No |
| 3712 | Cps1          | 0.0004 | No |
| 3713 | Fxyd6         | 0.0004 | No |
| 3714 | Gm12144       | 0.0004 | No |
| 3715 | 4930470O06Rik | 0.0004 | No |
| 3716 | Tmem229b-ps   | 0.0004 | No |
| 3717 | Ssxb9         | 0.0004 | No |
| 3718 | RP23-365J20.3 | 0.0004 | No |
| 3719 | Khdc1c        | 0.0004 | No |
| 3720 | Olfr172       | 0.0004 | No |
| 3721 | Gm17110       | 0.0004 | No |
| 3722 | 8030451A03Rik | 0.0004 | No |
| 3723 | Rab11b        | 0.0004 | No |

|      |               |        |    |
|------|---------------|--------|----|
| 3724 | Gm17159       | 0.0004 | No |
| 3725 | Igkv20-101-2  | 0.0004 | No |
| 3726 | Hoxd4         | 0.0004 | No |
| 3727 | Gm28406       | 0.0004 | No |
| 3728 | Obox4-ps3     | 0.0004 | No |
| 3729 | Gm42835       | 0.0004 | No |
| 3730 | Igkv13-64     | 0.0004 | No |
| 3731 | Gm16726       | 0.0004 | No |
| 3732 | Rnu3b3        | 0.0004 | No |
| 3733 | Olf400-ps1    | 0.0004 | No |
| 3734 | Cyp4a29-ps1   | 0.0004 | No |
| 3735 | Chst13        | 0.0004 | No |
| 3736 | Obox3-ps1     | 0.0004 | No |
| 3737 | Vmn1r180      | 0.0004 | No |
| 3738 | Igkv13-62-1   | 0.0004 | No |
| 3739 | Gm18916       | 0.0003 | No |
| 3740 | RP23-166P10.1 | 0.0003 | No |
| 3741 | Gm22389       | 0.0003 | No |
| 3742 | Serpinb3b     | 0.0003 | No |
| 3743 | Gm42618       | 0.0003 | No |
| 3744 | Defa-ps7      | 0.0003 | No |
| 3745 | Gm44671       | 0.0003 | No |
| 3746 | Olf455        | 0.0003 | No |
| 3747 | Gm37700       | 0.0003 | No |
| 3748 | Krt73         | 0.0003 | No |
| 3749 | Nkx2-2os      | 0.0003 | No |
| 3750 | Napa          | 0.0003 | No |
| 3751 | Olf1108-ps1   | 0.0003 | No |
| 3752 | mt-Co3        | 0.0003 | No |
| 3753 | Bcl2a1a       | 0.0003 | No |
| 3754 | Gm7452        | 0.0003 | No |
| 3755 | Eci2          | 0.0003 | No |
| 3756 | Aadacl3       | 0.0003 | No |
| 3757 | Gm23791       | 0.0003 | No |
| 3758 | Fxr2          | 0.0003 | No |
| 3759 | Gm33050       | 0.0003 | No |
| 3760 | Gm16250       | 0.0003 | No |
| 3761 | Ces2f         | 0.0003 | No |
| 3762 | Olf292        | 0.0003 | No |
| 3763 | Gm44442       | 0.0003 | No |
| 3764 | Rbpjl         | 0.0003 | No |
| 3765 | Gm25162       | 0.0003 | No |
| 3766 | Phf24         | 0.0003 | No |
| 3767 | Gm43508       | 0.0003 | No |
| 3768 | Vmn2r30       | 0.0003 | No |
| 3769 | Unc80         | 0.0003 | No |

|      |            |        |    |
|------|------------|--------|----|
| 3770 | Gm25982    | 0.0003 | No |
| 3771 | Eif3k      | 0.0003 | No |
| 3772 | Ginm1      | 0.0003 | No |
| 3773 | Tnfaip811  | 0.0003 | No |
| 3774 | Gm13632    | 0.0003 | No |
| 3775 | Krtap29-1  | 0.0003 | No |
| 3776 | Pmp22      | 0.0003 | No |
| 3777 | Mir343     | 0.0003 | No |
| 3778 | Gm42789    | 0.0003 | No |
| 3779 | Gm14397    | 0.0003 | No |
| 3780 | Gm5795     | 0.0003 | No |
| 3781 | St5        | 0.0003 | No |
| 3782 | Cst11      | 0.0003 | No |
| 3783 | Mbl2       | 0.0003 | No |
| 3784 | Mir7003    | 0.0003 | No |
| 3785 | Tie1       | 0.0003 | No |
| 3786 | Gm44070    | 0.0003 | No |
| 3787 | Gm12820    | 0.0003 | No |
| 3788 | Smtnl1     | 0.0003 | No |
| 3789 | Gm5346     | 0.0003 | No |
| 3790 | Olfr1161   | 0.0003 | No |
| 3791 | Kctd7      | 0.0003 | No |
| 3792 | Gm44168    | 0.0003 | No |
| 3793 | Gm9218     | 0.0003 | No |
| 3794 | Gm37267    | 0.0003 | No |
| 3795 | Gm3364     | 0.0003 | No |
| 3796 | Gm45388    | 0.0003 | No |
| 3797 | Izumo2     | 0.0003 | No |
| 3798 | Jag2       | 0.0003 | No |
| 3799 | Psmg4      | 0.0003 | No |
| 3800 | Obox6      | 0.0003 | No |
| 3801 | Mmp25      | 0.0003 | No |
| 3802 | C87198     | 0.0003 | No |
| 3803 | Vmn1r73    | 0.0003 | No |
| 3804 | Gm45608    | 0.0003 | No |
| 3805 | Olfr329-ps | 0.0003 | No |
| 3806 | Gm45171    | 0.0003 | No |
| 3807 | Gm12023    | 0.0003 | No |
| 3808 | Gm13137    | 0.0003 | No |
| 3809 | Gm6741     | 0.0003 | No |
| 3810 | Cdc7       | 0.0003 | No |
| 3811 | Mir200a    | 0.0003 | No |
| 3812 | Gm11545    | 0.0003 | No |
| 3813 | Ttbk1      | 0.0003 | No |
| 3814 | Gm25633    | 0.0003 | No |
| 3815 | Gm25335    | 0.0003 | No |

|      |               |        |    |
|------|---------------|--------|----|
| 3816 | Gm23326       | 0.0003 | No |
| 3817 | Gm6024        | 0.0003 | No |
| 3818 | 1700066J03Rik | 0.0003 | No |
| 3819 | 4930577H14Rik | 0.0003 | No |
| 3820 | Cyp46a1       | 0.0003 | No |
| 3821 | Traj4         | 0.0003 | No |
| 3822 | Gm27188       | 0.0003 | No |
| 3823 | Gm25965       | 0.0003 | No |
| 3824 | Gm17118       | 0.0003 | No |
| 3825 | Gm32175       | 0.0003 | No |
| 3826 | Gm28497       | 0.0003 | No |
| 3827 | Gm26876       | 0.0003 | No |
| 3828 | Mir6921       | 0.0003 | No |
| 3829 | Olf681        | 0.0003 | No |
| 3830 | Igf2          | 0.0003 | No |
| 3831 | Gm14073       | 0.0003 | No |
| 3832 | Scel          | 0.0003 | No |
| 3833 | Gm13751       | 0.0003 | No |
| 3834 | Gm38012       | 0.0003 | No |
| 3835 | Gm45091       | 0.0003 | No |
| 3836 | Gm44987       | 0.0003 | No |
| 3837 | Gpr82         | 0.0003 | No |
| 3838 | Gm28282       | 0.0003 | No |
| 3839 | Gm12951       | 0.0003 | No |
| 3840 | Spaca7        | 0.0003 | No |
| 3841 | Gm22068       | 0.0003 | No |
| 3842 | Olf866        | 0.0003 | No |
| 3843 | Gm43124       | 0.0003 | No |
| 3844 | Olf892-ps1    | 0.0003 | No |
| 3845 | Gm12365       | 0.0003 | No |
| 3846 | 1700102F20Rik | 0.0003 | No |
| 3847 | Gm42471       | 0.0003 | No |
| 3848 | Olf964-ps1    | 0.0003 | No |
| 3849 | Gm8891        | 0.0003 | No |
| 3850 | Gm36932       | 0.0003 | No |
| 3851 | Gm29570       | 0.0003 | No |
| 3852 | Ighv2-6-8     | 0.0003 | No |
| 3853 | Gm45032       | 0.0003 | No |
| 3854 | Gm36939       | 0.0003 | No |
| 3855 | F11           | 0.0003 | No |
| 3856 | Gm4665        | 0.0003 | No |
| 3857 | Krt8          | 0.0003 | No |
| 3858 | Gm44432       | 0.0003 | No |
| 3859 | Gm18484       | 0.0003 | No |
| 3860 | CH25-502A9.1  | 0.0003 | No |
| 3861 | 5033428I22Rik | 0.0003 | No |

|      |               |        |    |
|------|---------------|--------|----|
| 3862 | Gm18447       | 0.0003 | No |
| 3863 | AV356131      | 0.0003 | No |
| 3864 | Mir5619       | 0.0003 | No |
| 3865 | Gm27295       | 0.0003 | No |
| 3866 | Cyp3a41a      | 0.0003 | No |
| 3867 | 9230019H11Rik | 0.0003 | No |
| 3868 | 1700047K16Rik | 0.0003 | No |
| 3869 | Olf1750       | 0.0003 | No |
| 3870 | Mir6538       | 0.0003 | No |
| 3871 | Gm26412       | 0.0003 | No |
| 3872 | Gm37543       | 0.0003 | No |
| 3873 | Gm17790       | 0.0003 | No |
| 3874 | Gm22880       | 0.0003 | No |
| 3875 | 2310008N11Rik | 0.0003 | No |
| 3876 | Gm26844       | 0.0003 | No |
| 3877 | Gm11496       | 0.0003 | No |
| 3878 | Gm42615       | 0.0003 | No |
| 3879 | Gm4954        | 0.0003 | No |
| 3880 | Gm44435       | 0.0003 | No |
| 3881 | Gm25459       | 0.0003 | No |
| 3882 | Olf1008       | 0.0003 | No |
| 3883 | Olf995        | 0.0003 | No |
| 3884 | BC117090      | 0.0003 | No |
| 3885 | Olf1048       | 0.0003 | No |
| 3886 | Krt4          | 0.0003 | No |
| 3887 | Ascl2         | 0.0003 | No |
| 3888 | RP24-207M20.5 | 0.0003 | No |
| 3889 | Gm16348       | 0.0003 | No |
| 3890 | Cs            | 0.0003 | No |
| 3891 | Gm4852        | 0.0003 | No |
| 3892 | Gm23598       | 0.0003 | No |
| 3893 | Gm23178       | 0.0003 | No |
| 3894 | BC016548      | 0.0003 | No |
| 3895 | Gm26236       | 0.0003 | No |
| 3896 | Gm9731        | 0.0003 | No |
| 3897 | Gm22256       | 0.0003 | No |
| 3898 | Rhox3d-ps     | 0.0003 | No |
| 3899 | Fcgb          | 0.0003 | No |
| 3900 | Gm12145       | 0.0003 | No |
| 3901 | Gm28590       | 0.0003 | No |
| 3902 | Lingo1        | 0.0003 | No |
| 3903 | Gm4593        | 0.0003 | No |
| 3904 | Gm43494       | 0.0003 | No |
| 3905 | Olf229        | 0.0003 | No |
| 3906 | Trim8         | 0.0003 | No |
| 3907 | Nrsn2         | 0.0003 | No |

|      |               |        |    |
|------|---------------|--------|----|
| 3908 | Pcdhgb8       | 0.0003 | No |
| 3909 | Adam7         | 0.0003 | No |
| 3910 | Gm15362       | 0.0003 | No |
| 3911 | Gm1045        | 0.0003 | No |
| 3912 | Gm8069        | 0.0003 | No |
| 3913 | Gm27030       | 0.0003 | No |
| 3914 | Pcdhb4        | 0.0003 | No |
| 3915 | Gm44586       | 0.0003 | No |
| 3916 | Gm13607       | 0.0003 | No |
| 3917 | Vmn2r44       | 0.0003 | No |
| 3918 | Trav14d-3-dv8 | 0.0003 | No |
| 3919 | Olf911-ps1    | 0.0003 | No |
| 3920 | Gm28847       | 0.0003 | No |
| 3921 | Psg25         | 0.0003 | No |
| 3922 | Gm10037       | 0.0003 | No |
| 3923 | Olf911-ps1    | 0.0003 | No |
| 3924 | Gm25611       | 0.0003 | No |
| 3925 | Cdh10         | 0.0003 | No |
| 3926 | Slc22a6       | 0.0003 | No |
| 3927 | Gm15606       | 0.0003 | No |
| 3928 | Gm26795       | 0.0003 | No |
| 3929 | Olf911-ps1    | 0.0003 | No |
| 3930 | Gtf2a11       | 0.0003 | No |
| 3931 | RP23-145I16.3 | 0.0003 | No |
| 3932 | Gm42565       | 0.0003 | No |
| 3933 | Sirpb1b       | 0.0003 | No |
| 3934 | Gm12431       | 0.0003 | No |
| 3935 | Gm20177       | 0.0003 | No |
| 3936 | Egfl6         | 0.0003 | No |
| 3937 | Gm11734       | 0.0003 | No |
| 3938 | Gm11415       | 0.0003 | No |
| 3939 | Gm24897       | 0.0003 | No |
| 3940 | Gm884         | 0.0003 | No |
| 3941 | Gm43762       | 0.0003 | No |
| 3942 | Sgms2         | 0.0003 | No |
| 3943 | Mir28b        | 0.0003 | No |
| 3944 | Gm14897       | 0.0003 | No |
| 3945 | Gm42928       | 0.0003 | No |
| 3946 | Rab11fip4os2  | 0.0003 | No |
| 3947 | Gm43491       | 0.0003 | No |
| 3948 | Entpd8        | 0.0003 | No |
| 3949 | Gm32858       | 0.0003 | No |
| 3950 | Gm36070       | 0.0003 | No |
| 3951 | Gm43169       | 0.0003 | No |
| 3952 | Gm9273        | 0.0003 | No |
| 3953 | Gm42800       | 0.0003 | No |

|      |               |        |    |
|------|---------------|--------|----|
| 3954 | Klrc3         | 0.0003 | No |
| 3955 | Gm12875       | 0.0003 | No |
| 3956 | Gm37272       | 0.0003 | No |
| 3957 | Gm16577       | 0.0003 | No |
| 3958 | Camk2d        | 0.0003 | No |
| 3959 | Celrr         | 0.0003 | No |
| 3960 | Gm15404       | 0.0003 | No |
| 3961 | Gm29015       | 0.0003 | No |
| 3962 | Gm37479       | 0.0003 | No |
| 3963 | Gm38066       | 0.0003 | No |
| 3964 | Stfa1         | 0.0003 | No |
| 3965 | Gm6647        | 0.0003 | No |
| 3966 | Gm44208       | 0.0003 | No |
| 3967 | Gm11279       | 0.0003 | No |
| 3968 | Gm45152       | 0.0003 | No |
| 3969 | Olig2         | 0.0003 | No |
| 3970 | Gm45583       | 0.0003 | No |
| 3971 | Meioc         | 0.0003 | No |
| 3972 | Gm26037       | 0.0003 | No |
| 3973 | RP24-126O19.4 | 0.0003 | No |
| 3974 | CH36-165I3.2  | 0.0003 | No |
| 3975 | Gm26559       | 0.0003 | No |
| 3976 | Gm18716       | 0.0003 | No |
| 3977 | Rpl41         | 0.0003 | No |
| 3978 | Mup-ps3       | 0.0003 | No |
| 3979 | Olfr549       | 0.0003 | No |
| 3980 | Traf7         | 0.0003 | No |
| 3981 | Mir6962       | 0.0003 | No |
| 3982 | Chd9          | 0.0003 | No |
| 3983 | Aatk          | 0.0003 | No |
| 3984 | Mir297a-2     | 0.0003 | No |
| 3985 | Gm25149       | 0.0003 | No |
| 3986 | Vmn2r-ps121   | 0.0003 | No |
| 3987 | 9530013L04Rik | 0.0003 | No |
| 3988 | RP23-416I23.4 | 0.0003 | No |
| 3989 | Gm23202       | 0.0003 | No |
| 3990 | Gm25303       | 0.0003 | No |
| 3991 | Scn9a         | 0.0003 | No |
| 3992 | Sult2a3       | 0.0003 | No |
| 3993 | Olfr1228      | 0.0003 | No |
| 3994 | Gm43515       | 0.0003 | No |
| 3995 | Gm44764       | 0.0003 | No |
| 3996 | Gm11970       | 0.0003 | No |
| 3997 | Prss38        | 0.0003 | No |
| 3998 | Olfr488       | 0.0003 | No |
| 3999 | Prss23        | 0.0003 | No |

|      |               |        |    |
|------|---------------|--------|----|
| 4000 | Gm7416        | 0.0003 | No |
| 4001 | Gm813         | 0.0003 | No |
| 4002 | Gm23189       | 0.0003 | No |
| 4003 | Vmn1r-ps57    | 0.0003 | No |
| 4004 | Tgif2-ps2     | 0.0003 | No |
| 4005 | Muc2          | 0.0003 | No |
| 4006 | Cd244         | 0.0003 | No |
| 4007 | Capza3        | 0.0003 | No |
| 4008 | Gm38184       | 0.0003 | No |
| 4009 | Gm15765       | 0.0003 | No |
| 4010 | Nhlh1         | 0.0003 | No |
| 4011 | Gm11906       | 0.0003 | No |
| 4012 | Cxxc5         | 0.0003 | No |
| 4013 | Gm24841       | 0.0003 | No |
| 4014 | Gm12043       | 0.0003 | No |
| 4015 | Gm18009       | 0.0003 | No |
| 4016 | Chrd          | 0.0003 | No |
| 4017 | Lrp8          | 0.0003 | No |
| 4018 | Vmn1r217      | 0.0003 | No |
| 4019 | C1rb          | 0.0003 | No |
| 4020 | Krtap9-1      | 0.0003 | No |
| 4021 | Olf920        | 0.0003 | No |
| 4022 | Gm14314       | 0.0003 | No |
| 4023 | 2900092N22Rik | 0.0003 | No |
| 4024 | Igkv9-123     | 0.0003 | No |
| 4025 | Isx           | 0.0003 | No |
| 4026 | Gm24457       | 0.0003 | No |
| 4027 | Myof          | 0.0003 | No |
| 4028 | Rpl27         | 0.0003 | No |
| 4029 | Gm37134       | 0.0003 | No |
| 4030 | Gsdmcl2       | 0.0003 | No |
| 4031 | Lalba         | 0.0003 | No |
| 4032 | Gm6081        | 0.0003 | No |
| 4033 | Gm45524       | 0.0003 | No |
| 4034 | RP23-24C14.2  | 0.0003 | No |
| 4035 | Atf3          | 0.0003 | No |
| 4036 | Olf920        | 0.0003 | No |
| 4037 | Olf724        | 0.0003 | No |
| 4038 | Gm5251        | 0.0003 | No |
| 4039 | Gm28743       | 0.0003 | No |
| 4040 | 4921504A21Rik | 0.0003 | No |
| 4041 | Slc11a2       | 0.0003 | No |
| 4042 | F730035M05Rik | 0.0003 | No |
| 4043 | Sprr2a3       | 0.0003 | No |
| 4044 | Olf223        | 0.0003 | No |
| 4045 | Gm13111       | 0.0003 | No |



|      |               |        |    |
|------|---------------|--------|----|
| 4046 | Chrna7        | 0.0003 | No |
| 4047 | Gm16380       | 0.0003 | No |
| 4048 | Gm8752        | 0.0003 | No |
| 4049 | Ighg2b        | 0.0003 | No |
| 4050 | Gm12478       | 0.0003 | No |
| 4051 | Iqcf3         | 0.0003 | No |
| 4052 | Gm8597        | 0.0003 | No |
| 4053 | Lypd8         | 0.0003 | No |
| 4054 | Gm12817       | 0.0003 | No |
| 4055 | Gm22202       | 0.0003 | No |
| 4056 | Gm3687        | 0.0003 | No |
| 4057 | Gm14445       | 0.0003 | No |
| 4058 | Gm16194       | 0.0003 | No |
| 4059 | Gm4524        | 0.0003 | No |
| 4060 | Gm8587        | 0.0003 | No |
| 4061 | Gm24018       | 0.0003 | No |
| 4062 | Igkv4-58      | 0.0003 | No |
| 4063 | Mir8103       | 0.0003 | No |
| 4064 | Gm26793       | 0.0003 | No |
| 4065 | Gm29550       | 0.0003 | No |
| 4066 | Gm9791        | 0.0003 | No |
| 4067 | Gm44674       | 0.0003 | No |
| 4068 | Olf696-ps1    | 0.0003 | No |
| 4069 | Mir1950       | 0.0003 | No |
| 4070 | Elf4          | 0.0003 | No |
| 4071 | Gm8020        | 0.0003 | No |
| 4072 | Gm8812        | 0.0003 | No |
| 4073 | Rhox2f        | 0.0003 | No |
| 4074 | Gm44415       | 0.0003 | No |
| 4075 | Gm23325       | 0.0003 | No |
| 4076 | B230112I24Rik | 0.0003 | No |
| 4077 | BC002189      | 0.0003 | No |
| 4078 | 1700123O20Rik | 0.0003 | No |
| 4079 | Tex19.2       | 0.0003 | No |
| 4080 | Gm13256       | 0.0003 | No |
| 4081 | Cpa5          | 0.0003 | No |
| 4082 | Cers6         | 0.0003 | No |
| 4083 | Mir1962       | 0.0003 | No |
| 4084 | Gm43390       | 0.0003 | No |
| 4085 | Gm42704       | 0.0003 | No |
| 4086 | Gm28981       | 0.0003 | No |
| 4087 | Gm11881       | 0.0003 | No |
| 4088 | 7420700N18Rik | 0.0003 | No |
| 4089 | Bpifb2        | 0.0003 | No |
| 4090 | Iglj3p        | 0.0003 | No |
| 4091 | Gm44429       | 0.0003 | No |

|      |               |        |    |
|------|---------------|--------|----|
| 4092 | Rpl35-ps1     | 0.0003 | No |
| 4093 | Stc1          | 0.0003 | No |
| 4094 | Cpxcr1        | 0.0003 | No |
| 4095 | Otof          | 0.0003 | No |
| 4096 | Hrnr          | 0.0003 | No |
| 4097 | Gm21905       | 0.0003 | No |
| 4098 | Gm11781       | 0.0003 | No |
| 4099 | Gm38166       | 0.0003 | No |
| 4100 | BC037034      | 0.0003 | No |
| 4101 | Mir297c       | 0.0003 | No |
| 4102 | Gm45653       | 0.0003 | No |
| 4103 | Gml2          | 0.0003 | No |
| 4104 | Gm694         | 0.0003 | No |
| 4105 | Scgb2b5-ps    | 0.0003 | No |
| 4106 | Gm12309       | 0.0003 | No |
| 4107 | Gm21762       | 0.0003 | No |
| 4108 | Gm43098       | 0.0003 | No |
| 4109 | Gm25345       | 0.0003 | No |
| 4110 | Gm43850       | 0.0003 | No |
| 4111 | Gm11292       | 0.0003 | No |
| 4112 | Gm3116        | 0.0003 | No |
| 4113 | Gm20454       | 0.0003 | No |
| 4114 | Chp2          | 0.0003 | No |
| 4115 | Chrna1        | 0.0003 | No |
| 4116 | Tmem145       | 0.0003 | No |
| 4117 | Evc2          | 0.0003 | No |
| 4118 | BB019430      | 0.0003 | No |
| 4119 | Lrrc74b       | 0.0003 | No |
| 4120 | Slc16a2       | 0.0003 | No |
| 4121 | Ccdc64b       | 0.0003 | No |
| 4122 | Zfp853        | 0.0003 | No |
| 4123 | 4933406F09Rik | 0.0003 | No |
| 4124 | 0610030E20Rik | 0.0003 | No |
| 4125 | 4930563E18Rik | 0.0003 | No |
| 4126 | 1700065I16Rik | 0.0003 | No |
| 4127 | Gm17182       | 0.0003 | No |
| 4128 | Gm37364       | 0.0003 | No |
| 4129 | Gm17315       | 0.0003 | No |
| 4130 | Ssh2          | 0.0003 | No |
| 4131 | Gm13231       | 0.0003 | No |
| 4132 | Gm42445       | 0.0003 | No |
| 4133 | Gm43281       | 0.0003 | No |
| 4134 | Olf403        | 0.0003 | No |
| 4135 | Fam57b        | 0.0003 | No |
| 4136 | 4930505M18Rik | 0.0003 | No |
| 4137 | RP24-167A12.1 | 0.0003 | No |

|      |               |        |    |
|------|---------------|--------|----|
| 4138 | Pkd2          | 0.0003 | No |
| 4139 | Gm38301       | 0.0003 | No |
| 4140 | Gm25707       | 0.0003 | No |
| 4141 | Rpl31-ps24    | 0.0003 | No |
| 4142 | Olfrl116      | 0.0003 | No |
| 4143 | Acrbp         | 0.0003 | No |
| 4144 | Stambpl1      | 0.0003 | No |
| 4145 | Sox14         | 0.0003 | No |
| 4146 | Bdkrb2        | 0.0003 | No |
| 4147 | Olfrl357      | 0.0003 | No |
| 4148 | Grin2d        | 0.0003 | No |
| 4149 | Gm14638       | 0.0003 | No |
| 4150 | Gm37679       | 0.0003 | No |
| 4151 | Adgrb2        | 0.0003 | No |
| 4152 | Gm7125        | 0.0003 | No |
| 4153 | Gm12272       | 0.0003 | No |
| 4154 | C230079O03Rik | 0.0003 | No |
| 4155 | Olfrl785      | 0.0003 | No |
| 4156 | Gm37862       | 0.0003 | No |
| 4157 | Ighv1-38      | 0.0003 | No |
| 4158 | Gm23734       | 0.0003 | No |
| 4159 | Olfrl1090     | 0.0003 | No |
| 4160 | Gm25795       | 0.0003 | No |
| 4161 | 1700031P21Rik | 0.0003 | No |
| 4162 | RP24-86K19.1  | 0.0003 | No |
| 4163 | Gm15783       | 0.0003 | No |
| 4164 | Gm24454       | 0.0003 | No |
| 4165 | Gm24339       | 0.0003 | No |
| 4166 | Mir7029       | 0.0003 | No |
| 4167 | Gm29052       | 0.0003 | No |
| 4168 | Gm28920       | 0.0003 | No |
| 4169 | Gm24178       | 0.0003 | No |
| 4170 | Cyp4a12a      | 0.0003 | No |
| 4171 | 1700015F17Rik | 0.0003 | No |
| 4172 | 1810020O05Rik | 0.0003 | No |
| 4173 | Mir92-2       | 0.0003 | No |
| 4174 | Mgat5         | 0.0003 | No |
| 4175 | Med9os        | 0.0003 | No |
| 4176 | Gm18356       | 0.0003 | No |
| 4177 | Scarf1        | 0.0003 | No |
| 4178 | Myadml2       | 0.0003 | No |
| 4179 | Gm19961       | 0.0003 | No |
| 4180 | Gm42747       | 0.0003 | No |
| 4181 | Gm17987       | 0.0003 | No |
| 4182 | Gm43345       | 0.0003 | No |
| 4183 | Gm14793       | 0.0003 | No |

|      |               |        |    |
|------|---------------|--------|----|
| 4184 | Fam13b        | 0.0003 | No |
| 4185 | Atg10         | 0.0003 | No |
| 4186 | Gm12120       | 0.0003 | No |
| 4187 | Ssxb8         | 0.0003 | No |
| 4188 | Shtn1         | 0.0003 | No |
| 4189 | Gm11802       | 0.0003 | No |
| 4190 | Gm11907       | 0.0003 | No |
| 4191 | 4930439D14Rik | 0.0003 | No |
| 4192 | 2900072N19Rik | 0.0003 | No |
| 4193 | Gm43070       | 0.0003 | No |
| 4194 | Gm37825       | 0.0003 | No |
| 4195 | Gm12535       | 0.0003 | No |
| 4196 | Gm9397        | 0.0003 | No |
| 4197 | Gm45037       | 0.0003 | No |
| 4198 | Crocc2        | 0.0003 | No |
| 4199 | Gm15448       | 0.0003 | No |
| 4200 | Gm6619        | 0.0003 | No |
| 4201 | Olf761        | 0.0003 | No |
| 4202 | Gm25058       | 0.0003 | No |
| 4203 | Gm14745       | 0.0003 | No |
| 4204 | Slc34a1       | 0.0003 | No |
| 4205 | Olf608        | 0.0003 | No |
| 4206 | Gm37491       | 0.0003 | No |
| 4207 | Map7d1        | 0.0003 | No |
| 4208 | Crygf         | 0.0003 | No |
| 4209 | 4921514A10Rik | 0.0003 | No |
| 4210 | Pramef12os    | 0.0003 | No |
| 4211 | Gm15353       | 0.0003 | No |
| 4212 | Gm20647       | 0.0003 | No |
| 4213 | Gprin1        | 0.0003 | No |
| 4214 | Gm45549       | 0.0003 | No |
| 4215 | Gm28382       | 0.0003 | No |
| 4216 | 1700120G11Rik | 0.0003 | No |
| 4217 | Perp          | 0.0003 | No |
| 4218 | Rpl38         | 0.0003 | No |
| 4219 | Gm32736       | 0.0003 | No |
| 4220 | Gm6855        | 0.0003 | No |
| 4221 | RP23-61B14.3  | 0.0003 | No |
| 4222 | Gba2          | 0.0003 | No |
| 4223 | Tomm20        | 0.0003 | No |
| 4224 | Vmn1r-ps32    | 0.0003 | No |
| 4225 | Gm43797       | 0.0003 | No |
| 4226 | Gm37817       | 0.0003 | No |
| 4227 | Rap1gap       | 0.0003 | No |
| 4228 | Fhl5          | 0.0003 | No |
| 4229 | Gm27043       | 0.0003 | No |

|      |               |        |    |
|------|---------------|--------|----|
| 4230 | Gm8260        | 0.0003 | No |
| 4231 | Gm5320        | 0.0003 | No |
| 4232 | Olf492        | 0.0003 | No |
| 4233 | Gm18907       | 0.0003 | No |
| 4234 | RP24-94F12.7  | 0.0003 | No |
| 4235 | Gm16546       | 0.0003 | No |
| 4236 | Trav6n-6      | 0.0003 | No |
| 4237 | Snord13       | 0.0003 | No |
| 4238 | 6430573P05Rik | 0.0003 | No |
| 4239 | Gm43799       | 0.0003 | No |
| 4240 | Gm26301       | 0.0003 | No |
| 4241 | Gm29054       | 0.0003 | No |
| 4242 | Gm18833       | 0.0003 | No |
| 4243 | Gm42754       | 0.0003 | No |
| 4244 | Tbrg1         | 0.0003 | No |
| 4245 | Trps1         | 0.0003 | No |
| 4246 | 1700001K19Rik | 0.0003 | No |
| 4247 | Gm18593       | 0.0003 | No |
| 4248 | Gm6096        | 0.0003 | No |
| 4249 | Gm24006       | 0.0003 | No |
| 4250 | Mtmr12        | 0.0003 | No |
| 4251 | Dpyd          | 0.0003 | No |
| 4252 | Tnxa          | 0.0003 | No |
| 4253 | Igkv2-112     | 0.0003 | No |
| 4254 | Gm28388       | 0.0003 | No |
| 4255 | Fxyd2         | 0.0003 | No |
| 4256 | Gm9553        | 0.0003 | No |
| 4257 | Gm26427       | 0.0003 | No |
| 4258 | Gm45609       | 0.0003 | No |
| 4259 | Traj61        | 0.0003 | No |
| 4260 | Gm28196       | 0.0003 | No |
| 4261 | Gm27775       | 0.0003 | No |
| 4262 | Klk1b23-ps    | 0.0003 | No |
| 4263 | Cysrt1        | 0.0003 | No |
| 4264 | D830044D21Rik | 0.0003 | No |
| 4265 | Cnpy1         | 0.0003 | No |
| 4266 | Gm19791       | 0.0003 | No |
| 4267 | B830012L14Rik | 0.0003 | No |
| 4268 | Platr9        | 0.0003 | No |
| 4269 | Gm4795        | 0.0003 | No |
| 4270 | Gm10295       | 0.0003 | No |
| 4271 | Igkv14-100    | 0.0003 | No |
| 4272 | Trdn          | 0.0003 | No |
| 4273 | Gm17838       | 0.0003 | No |
| 4274 | 4933407E24Rik | 0.0003 | No |
| 4275 | Arhgap21      | 0.0003 | No |

|      |               |        |    |
|------|---------------|--------|----|
| 4276 | Gm12635       | 0.0003 | No |
| 4277 | Mup10         | 0.0003 | No |
| 4278 | Vax2os        | 0.0003 | No |
| 4279 | Gm42714       | 0.0003 | No |
| 4280 | Gm15881       | 0.0003 | No |
| 4281 | Gm23039       | 0.0003 | No |
| 4282 | Gm45578       | 0.0003 | No |
| 4283 | Gm5592        | 0.0003 | No |
| 4284 | Gm5390        | 0.0003 | No |
| 4285 | Gm27163       | 0.0003 | No |
| 4286 | Has2os        | 0.0003 | No |
| 4287 | Vmn2r-ps15    | 0.0003 | No |
| 4288 | Gm11790       | 0.0003 | No |
| 4289 | Esp15         | 0.0003 | No |
| 4290 | Gm9165        | 0.0003 | No |
| 4291 | Vmn2r-ps54    | 0.0003 | No |
| 4292 | Gm14381       | 0.0003 | No |
| 4293 | Fam83c        | 0.0003 | No |
| 4294 | Gm9697        | 0.0003 | No |
| 4295 | Asb3          | 0.0003 | No |
| 4296 | Ppp1r17       | 0.0003 | No |
| 4297 | Gm37525       | 0.0003 | No |
| 4298 | Gm22888       | 0.0003 | No |
| 4299 | Prkar1a       | 0.0003 | No |
| 4300 | 1700095B10Rik | 0.0003 | No |
| 4301 | Gm28991       | 0.0003 | No |
| 4302 | Gm44659       | 0.0003 | No |
| 4303 | Dlx4          | 0.0003 | No |
| 4304 | 1700029N11Rik | 0.0003 | No |
| 4305 | Gm14828       | 0.0003 | No |
| 4306 | Gm43452       | 0.0003 | No |
| 4307 | Gm16110       | 0.0003 | No |
| 4308 | Mir144        | 0.0003 | No |
| 4309 | 4930401O12Rik | 0.0003 | No |
| 4310 | RP23-297P22.1 | 0.0003 | No |
| 4311 | Gm44365       | 0.0003 | No |
| 4312 | RP24-82M4.3   | 0.0003 | No |
| 4313 | Gm12326       | 0.0003 | No |
| 4314 | Gm43595       | 0.0003 | No |
| 4315 | Gm13425       | 0.0003 | No |
| 4316 | Gm43923       | 0.0003 | No |
| 4317 | 5830468F06Rik | 0.0003 | No |
| 4318 | 4933439N14Rik | 0.0003 | No |
| 4319 | Gm42779       | 0.0003 | No |
| 4320 | Negr1         | 0.0003 | No |
| 4321 | Pllp          | 0.0003 | No |

|      |               |        |    |
|------|---------------|--------|----|
| 4322 | Mrps36-ps2    | 0.0003 | No |
| 4323 | Gm11682       | 0.0003 | No |
| 4324 | Gm21048       | 0.0003 | No |
| 4325 | Gm28445       | 0.0003 | No |
| 4326 | Irs1          | 0.0003 | No |
| 4327 | Gm24429       | 0.0003 | No |
| 4328 | Gm15120       | 0.0003 | No |
| 4329 | Gm19028       | 0.0003 | No |
| 4330 | Gm2497        | 0.0003 | No |
| 4331 | Acsn5         | 0.0003 | No |
| 4332 | Gm37333       | 0.0003 | No |
| 4333 | Gm24271       | 0.0003 | No |
| 4334 | Gm42609       | 0.0003 | No |
| 4335 | Gm11810       | 0.0003 | No |
| 4336 | Mir763        | 0.0003 | No |
| 4337 | Slc5a5        | 0.0003 | No |
| 4338 | Gm42817       | 0.0003 | No |
| 4339 | Gm24385       | 0.0003 | No |
| 4340 | Tmem151a      | 0.0003 | No |
| 4341 | Gm14848       | 0.0003 | No |
| 4342 | Coro2b        | 0.0003 | No |
| 4343 | Gm15495       | 0.0003 | No |
| 4344 | Gm10440       | 0.0003 | No |
| 4345 | Trav7-3       | 0.0003 | No |
| 4346 | Dqx1          | 0.0003 | No |
| 4347 | Vmn1r199      | 0.0003 | No |
| 4348 | Gm22477       | 0.0003 | No |
| 4349 | Gm37322       | 0.0003 | No |
| 4350 | Ankdd1a       | 0.0003 | No |
| 4351 | Gm10220       | 0.0003 | No |
| 4352 | Gm12132       | 0.0003 | No |
| 4353 | Gm44633       | 0.0003 | No |
| 4354 | Vmn1r201      | 0.0003 | No |
| 4355 | Vmn1r193      | 0.0003 | No |
| 4356 | Atp5k-ps2     | 0.0003 | No |
| 4357 | Olf650-ps1    | 0.0003 | No |
| 4358 | Trav3-1       | 0.0003 | No |
| 4359 | 9130204K15Rik | 0.0003 | No |
| 4360 | Gm29005       | 0.0003 | No |
| 4361 | Gm8837        | 0.0003 | No |
| 4362 | Gm20743       | 0.0003 | No |
| 4363 | Gm22228       | 0.0003 | No |
| 4364 | A730049H05Rik | 0.0003 | No |
| 4365 | Traj56        | 0.0003 | No |
| 4366 | Gm37048       | 0.0003 | No |
| 4367 | Gm11513       | 0.0003 | No |

|      |               |        |    |
|------|---------------|--------|----|
| 4368 | Gm38043       | 0.0003 | No |
| 4369 | Vmn2r111      | 0.0003 | No |
| 4370 | Olfr1503-ps1  | 0.0003 | No |
| 4371 | Gm6851        | 0.0003 | No |
| 4372 | Gm15755       | 0.0003 | No |
| 4373 | Gm24754       | 0.0003 | No |
| 4374 | Gm12237       | 0.0003 | No |
| 4375 | Gm4487        | 0.0003 | No |
| 4376 | G930045G22Rik | 0.0003 | No |
| 4377 | Ucp1          | 0.0003 | No |
| 4378 | Ugt2b36       | 0.0003 | No |
| 4379 | Gm26785       | 0.0003 | No |
| 4380 | Gm16494       | 0.0003 | No |
| 4381 | Gm42513       | 0.0003 | No |
| 4382 | Gm45067       | 0.0003 | No |
| 4383 | Gm42647       | 0.0003 | No |
| 4384 | Akr1cl        | 0.0003 | No |
| 4385 | Gm23910       | 0.0003 | No |
| 4386 | Fam229a       | 0.0003 | No |
| 4387 | Lamtor3       | 0.0003 | No |
| 4388 | Mir744        | 0.0003 | No |
| 4389 | Gm5717        | 0.0003 | No |
| 4390 | Cypt3         | 0.0003 | No |
| 4391 | Gm13857       | 0.0003 | No |
| 4392 | Gm13754       | 0.0003 | No |
| 4393 | Kcnj14        | 0.0003 | No |
| 4394 | Gm13029       | 0.0003 | No |
| 4395 | Tmem45a       | 0.0003 | No |
| 4396 | Safb          | 0.0003 | No |
| 4397 | Gm14664       | 0.0003 | No |
| 4398 | Gm25410       | 0.0003 | No |
| 4399 | Gm22897       | 0.0003 | No |
| 4400 | Gm29156       | 0.0003 | No |
| 4401 | Vmn1r89       | 0.0003 | No |
| 4402 | Plekhh3       | 0.0003 | No |
| 4403 | Figla         | 0.0003 | No |
| 4404 | Clca2         | 0.0003 | No |
| 4405 | Tanc1         | 0.0003 | No |
| 4406 | Gm44463       | 0.0003 | No |
| 4407 | Gm43955       | 0.0003 | No |
| 4408 | Gm22088       | 0.0003 | No |
| 4409 | Gm28630       | 0.0003 | No |
| 4410 | Mir302c       | 0.0003 | No |
| 4411 | Spon2         | 0.0003 | No |
| 4412 | Gm13986       | 0.0003 | No |
| 4413 | Abhd11os      | 0.0003 | No |



|      |               |        |    |
|------|---------------|--------|----|
| 4414 | Hc            | 0.0003 | No |
| 4415 | Gm43329       | 0.0003 | No |
| 4416 | Platr13       | 0.0003 | No |
| 4417 | Acod1         | 0.0003 | No |
| 4418 | Gm42804       | 0.0003 | No |
| 4419 | Resp18        | 0.0003 | No |
| 4420 | Gm26253       | 0.0003 | No |
| 4421 | Gm9332        | 0.0003 | No |
| 4422 | Wnt16         | 0.0003 | No |
| 4423 | A330069E16Rik | 0.0003 | No |
| 4424 | Gm43756       | 0.0003 | No |
| 4425 | Ndufa7        | 0.0003 | No |
| 4426 | Tmem215       | 0.0003 | No |
| 4427 | Brsk1         | 0.0003 | No |
| 4428 | Gm13802       | 0.0003 | No |
| 4429 | Olfir889      | 0.0003 | No |
| 4430 | Mfge8         | 0.0003 | No |
| 4431 | Fam196b       | 0.0003 | No |
| 4432 | Scamp5        | 0.0003 | No |
| 4433 | Mfrp          | 0.0003 | No |
| 4434 | Gm45477       | 0.0003 | No |
| 4435 | Gm36992       | 0.0003 | No |
| 4436 | RP23-72A20.11 | 0.0003 | No |
| 4437 | Gm24851       | 0.0003 | No |
| 4438 | 1700020I14Rik | 0.0003 | No |
| 4439 | Gm4217        | 0.0003 | No |
| 4440 | Gm2617        | 0.0003 | No |
| 4441 | Gm17100       | 0.0003 | No |
| 4442 | Vmn2r4        | 0.0003 | No |
| 4443 | Olfir178      | 0.0003 | No |
| 4444 | Gm37099       | 0.0003 | No |
| 4445 | Gm11224       | 0.0003 | No |
| 4446 | Gm15744       | 0.0003 | No |
| 4447 | Olfir266      | 0.0003 | No |
| 4448 | RP23-75I5.1   | 0.0003 | No |
| 4449 | 1700024G13Rik | 0.0003 | No |
| 4450 | Tekt4         | 0.0003 | No |
| 4451 | Gm15382       | 0.0003 | No |
| 4452 | RP23-329B5.1  | 0.0003 | No |
| 4453 | C530044C16Rik | 0.0003 | No |
| 4454 | Gm37956       | 0.0003 | No |
| 4455 | Olfir1219     | 0.0003 | No |
| 4456 | 3830417A13Rik | 0.0003 | No |
| 4457 | Dock11        | 0.0003 | No |
| 4458 | Rnf157        | 0.0003 | No |
| 4459 | Tmc4-ps       | 0.0003 | No |

|      |               |        |    |
|------|---------------|--------|----|
| 4460 | 4930598A11Rik | 0.0003 | No |
| 4461 | Tyropb        | 0.0003 | No |
| 4462 | Gm26480       | 0.0003 | No |
| 4463 | Vmn2r-ps94    | 0.0003 | No |
| 4464 | Gm18838       | 0.0003 | No |
| 4465 | Gm37669       | 0.0003 | No |
| 4466 | Atf7ip        | 0.0003 | No |
| 4467 | 5830415G21Rik | 0.0003 | No |
| 4468 | Igkv15-102    | 0.0003 | No |
| 4469 | Ighv1-50      | 0.0003 | No |
| 4470 | Mmnr2         | 0.0003 | No |
| 4471 | Nme8          | 0.0003 | No |
| 4472 | Gpm6b         | 0.0003 | No |
| 4473 | Dppa1         | 0.0003 | No |
| 4474 | Cyp2j5        | 0.0003 | No |
| 4475 | Gm14642       | 0.0003 | No |
| 4476 | Htr3b         | 0.0003 | No |
| 4477 | Gm11422       | 0.0003 | No |
| 4478 | Gm27014       | 0.0003 | No |
| 4479 | Gm23113       | 0.0003 | No |
| 4480 | Gm14787       | 0.0003 | No |
| 4481 | Mapk8ip1      | 0.0003 | No |
| 4482 | Gm14098       | 0.0003 | No |
| 4483 | Gm42431       | 0.0003 | No |
| 4484 | Cldn34d       | 0.0003 | No |
| 4485 | Gm43334       | 0.0003 | No |
| 4486 | Mir3085       | 0.0003 | No |
| 4487 | Igkv8-26      | 0.0003 | No |
| 4488 | Acsn4         | 0.0003 | No |
| 4489 | Zfp616        | 0.0003 | No |
| 4490 | St6gal1       | 0.0003 | No |
| 4491 | Gm25727       | 0.0003 | No |
| 4492 | RP24-247A8.2  | 0.0003 | No |
| 4493 | Gm18011       | 0.0003 | No |
| 4494 | St8sia4       | 0.0003 | No |
| 4495 | Ss18          | 0.0003 | No |
| 4496 | Trav6-5       | 0.0003 | No |
| 4497 | Gm28271       | 0.0003 | No |
| 4498 | Gm37137       | 0.0003 | No |
| 4499 | RP23-386F15.2 | 0.0003 | No |
| 4500 | Figl2         | 0.0003 | No |
| 4501 | Rps25         | 0.0003 | No |
| 4502 | Gm16026       | 0.0003 | No |
| 4503 | Gm6726        | 0.0003 | No |
| 4504 | Gm24076       | 0.0003 | No |
| 4505 | Gm5045        | 0.0003 | No |

|      |               |        |    |
|------|---------------|--------|----|
| 4506 | Mir6381       | 0.0003 | No |
| 4507 | Gm15457       | 0.0003 | No |
| 4508 | Gm3654        | 0.0003 | No |
| 4509 | Klra2         | 0.0003 | No |
| 4510 | 9530026P05Rik | 0.0003 | No |
| 4511 | Glycam1       | 0.0003 | No |
| 4512 | Gm45584       | 0.0003 | No |
| 4513 | Gm29237       | 0.0003 | No |
| 4514 | Gm13884       | 0.0003 | No |
| 4515 | Gm42794       | 0.0003 | No |
| 4516 | Helt          | 0.0003 | No |
| 4517 | Gm6356        | 0.0003 | No |
| 4518 | Gm11939       | 0.0003 | No |
| 4519 | Olfir987      | 0.0003 | No |
| 4520 | Vwa7          | 0.0003 | No |
| 4521 | Defb47        | 0.0003 | No |
| 4522 | Mir8091       | 0.0003 | No |
| 4523 | Gm22478       | 0.0003 | No |
| 4524 | Gm44954       | 0.0003 | No |
| 4525 | Gm44809       | 0.0003 | No |
| 4526 | Gm15221       | 0.0003 | No |
| 4527 | Gm13426       | 0.0003 | No |
| 4528 | Fam25c        | 0.0003 | No |
| 4529 | Gm43952       | 0.0003 | No |
| 4530 | Gm37301       | 0.0003 | No |
| 4531 | Mir15a        | 0.0003 | No |
| 4532 | Gm17021       | 0.0003 | No |
| 4533 | Gm5447        | 0.0003 | No |
| 4534 | Gm45136       | 0.0003 | No |
| 4535 | Gm24873       | 0.0003 | No |
| 4536 | Gm6806        | 0.0003 | No |
| 4537 | Gm45506       | 0.0003 | No |
| 4538 | RP23-471H21.3 | 0.0003 | No |
| 4539 | Gm26318       | 0.0003 | No |
| 4540 | Nrtn          | 0.0003 | No |
| 4541 | Ugt1a5        | 0.0003 | No |
| 4542 | Olfir1422-ps1 | 0.0003 | No |
| 4543 | Prss39        | 0.0003 | No |
| 4544 | Zbed4-ps2     | 0.0003 | No |
| 4545 | A930036I15Rik | 0.0003 | No |
| 4546 | Gm24838       | 0.0003 | No |
| 4547 | Gm8919        | 0.0003 | No |
| 4548 | Gm2348        | 0.0003 | No |
| 4549 | Chd3          | 0.0003 | No |
| 4550 | Gm11213       | 0.0003 | No |
| 4551 | Gm25842       | 0.0003 | No |

|      |               |        |    |
|------|---------------|--------|----|
| 4552 | Gm26947       | 0.0003 | No |
| 4553 | Nif3l1        | 0.0003 | No |
| 4554 | 2810402E24Rik | 0.0003 | No |
| 4555 | Gm12056       | 0.0003 | No |
| 4556 | Ighv5-21      | 0.0003 | No |
| 4557 | Ankrd55       | 0.0003 | No |
| 4558 | Gm12580       | 0.0003 | No |
| 4559 | Gm14064       | 0.0003 | No |
| 4560 | Cxcl13        | 0.0003 | No |
| 4561 | RP23-407B23.4 | 0.0003 | No |
| 4562 | Gm38337       | 0.0003 | No |
| 4563 | Xcl1          | 0.0003 | No |
| 4564 | Gm25622       | 0.0003 | No |
| 4565 | Gm10441       | 0.0003 | No |
| 4566 | Gm27177       | 0.0003 | No |
| 4567 | Gm11673       | 0.0003 | No |
| 4568 | Gm43210       | 0.0003 | No |
| 4569 | Creb3l2       | 0.0003 | No |
| 4570 | Gm44266       | 0.0003 | No |
| 4571 | Gm22005       | 0.0003 | No |
| 4572 | Atp2a3        | 0.0003 | No |
| 4573 | 4930480K15Rik | 0.0003 | No |
| 4574 | Cfp           | 0.0003 | No |
| 4575 | Igkv4-78      | 0.0003 | No |
| 4576 | Gm12709       | 0.0003 | No |
| 4577 | Mup-ps20      | 0.0003 | No |
| 4578 | Gm12604       | 0.0003 | No |
| 4579 | Gm44880       | 0.0003 | No |
| 4580 | Prok2         | 0.0003 | No |
| 4581 | Gm28288       | 0.0003 | No |
| 4582 | Gm13352       | 0.0003 | No |
| 4583 | Rps24         | 0.0003 | No |
| 4584 | Nxph1         | 0.0003 | No |
| 4585 | Drd2          | 0.0003 | No |
| 4586 | Gm7142        | 0.0003 | No |
| 4587 | A030005K14Rik | 0.0003 | No |
| 4588 | Igkv4-74      | 0.0003 | No |
| 4589 | Olfir290      | 0.0003 | No |
| 4590 | Cops2         | 0.0003 | No |
| 4591 | Gm24288       | 0.0003 | No |
| 4592 | Nlrp4b        | 0.0003 | No |
| 4593 | A930035D04Rik | 0.0003 | No |
| 4594 | Gm19027       | 0.0003 | No |
| 4595 | Kcnab2        | 0.0003 | No |
| 4596 | Mir6975       | 0.0003 | No |
| 4597 | Gm29055       | 0.0003 | No |

|      |               |        |    |
|------|---------------|--------|----|
| 4598 | RP23-402N3.3  | 0.0003 | No |
| 4599 | 1700010B08Rik | 0.0003 | No |
| 4600 | Gal3st4       | 0.0003 | No |
| 4601 | Gm16464       | 0.0003 | No |
| 4602 | Olf181        | 0.0003 | No |
| 4603 | Gm13119       | 0.0003 | No |
| 4604 | Olf680-ps1    | 0.0003 | No |
| 4605 | RP23-220F20.4 | 0.0003 | No |
| 4606 | Trem1         | 0.0003 | No |
| 4607 | Gm24198       | 0.0003 | No |
| 4608 | Olf1160       | 0.0003 | No |
| 4609 | Cst8          | 0.0003 | No |
| 4610 | Gm43386       | 0.0003 | No |
| 4611 | Gm7706        | 0.0003 | No |
| 4612 | Gm37533       | 0.0003 | No |
| 4613 | RP23-346G14.1 | 0.0003 | No |
| 4614 | Dhx8          | 0.0003 | No |
| 4615 | RP23-11B13.5  | 0.0003 | No |
| 4616 | Muc15         | 0.0003 | No |
| 4617 | Gm12934       | 0.0003 | No |
| 4618 | Cryba2        | 0.0003 | No |
| 4619 | Accs1         | 0.0003 | No |
| 4620 | Gm42530       | 0.0003 | No |
| 4621 | Gm23141       | 0.0003 | No |
| 4622 | Gm34368       | 0.0003 | No |
| 4623 | Mir1960       | 0.0003 | No |
| 4624 | Gm2046        | 0.0003 | No |
| 4625 | Gm23796       | 0.0003 | No |
| 4626 | Btn15-ps      | 0.0003 | No |
| 4627 | RP23-128A23.2 | 0.0003 | No |
| 4628 | Slc5a4b       | 0.0003 | No |
| 4629 | D830013O20Rik | 0.0003 | No |
| 4630 | Krt26         | 0.0003 | No |
| 4631 | RP23-468H22.4 | 0.0003 | No |
| 4632 | Trav6-3       | 0.0003 | No |
| 4633 | Gm29590       | 0.0003 | No |
| 4634 | Klrc1         | 0.0003 | No |
| 4635 | Zbtb9         | 0.0003 | No |
| 4636 | Gm12135       | 0.0003 | No |
| 4637 | Sema6c        | 0.0003 | No |
| 4638 | Gm13963       | 0.0003 | No |
| 4639 | Gm15182       | 0.0003 | No |
| 4640 | Aox1          | 0.0003 | No |
| 4641 | Defa26        | 0.0003 | No |
| 4642 | Gm35392       | 0.0003 | No |
| 4643 | Olf123        | 0.0003 | No |

|      |               |        |    |
|------|---------------|--------|----|
| 4644 | Gm43503       | 0.0003 | No |
| 4645 | Pnck          | 0.0003 | No |
| 4646 | Tmem158       | 0.0003 | No |
| 4647 | Gm12119       | 0.0003 | No |
| 4648 | Gm3047        | 0.0003 | No |
| 4649 | Gm17070       | 0.0003 | No |
| 4650 | Gm13807       | 0.0003 | No |
| 4651 | Gm10803       | 0.0003 | No |
| 4652 | Olfr1148      | 0.0003 | No |
| 4653 | Gtf2a2        | 0.0003 | No |
| 4654 | Spaca3        | 0.0003 | No |
| 4655 | Gm15566       | 0.0003 | No |
| 4656 | Gm26784       | 0.0003 | No |
| 4657 | Arl14         | 0.0003 | No |
| 4658 | Gm9573        | 0.0003 | No |
| 4659 | Gm25196       | 0.0003 | No |
| 4660 | Gm42904       | 0.0003 | No |
| 4661 | Olfr944       | 0.0003 | No |
| 4662 | Vgll4         | 0.0003 | No |
| 4663 | Taar8a        | 0.0003 | No |
| 4664 | D130058E05Rik | 0.0003 | No |
| 4665 | Gm37226       | 0.0003 | No |
| 4666 | Gm11341       | 0.0003 | No |
| 4667 | Yif1a         | 0.0003 | No |
| 4668 | Gm28667       | 0.0003 | No |
| 4669 | Gm12484       | 0.0003 | No |
| 4670 | Tubb3         | 0.0003 | No |
| 4671 | Usp9y         | 0.0003 | No |
| 4672 | Cyp2c65       | 0.0003 | No |
| 4673 | Mpdz          | 0.0003 | No |
| 4674 | Ivl           | 0.0003 | No |
| 4675 | Ssxb1         | 0.0003 | No |
| 4676 | Gm9922        | 0.0003 | No |
| 4677 | Ptgis         | 0.0003 | No |
| 4678 | Plxna3        | 0.0003 | No |
| 4679 | Gm10384       | 0.0003 | No |
| 4680 | Olfr1183      | 0.0003 | No |
| 4681 | 1700029M03Rik | 0.0003 | No |
| 4682 | Zgpat         | 0.0003 | No |
| 4683 | Gm37170       | 0.0003 | No |
| 4684 | Gm11877       | 0.0003 | No |
| 4685 | Mex3b         | 0.0003 | No |
| 4686 | Gm13032       | 0.0003 | No |
| 4687 | Gm21798       | 0.0003 | No |
| 4688 | Gm14250       | 0.0003 | No |
| 4689 | Gm26441       | 0.0003 | No |

|      |               |        |    |
|------|---------------|--------|----|
| 4690 | Mir6916       | 0.0003 | No |
| 4691 | Gm28526       | 0.0003 | No |
| 4692 | Dcaf7         | 0.0003 | No |
| 4693 | Gm29629       | 0.0003 | No |
| 4694 | Hbb-bh2       | 0.0003 | No |
| 4695 | Gpx6          | 0.0003 | No |
| 4696 | Cntrobos      | 0.0003 | No |
| 4697 | Kat6a         | 0.0003 | No |
| 4698 | 1700125G22Rik | 0.0003 | No |
| 4699 | Gm28703       | 0.0003 | No |
| 4700 | RP23-336P20.1 | 0.0003 | No |
| 4701 | Prnd          | 0.0003 | No |
| 4702 | Ell3          | 0.0003 | No |
| 4703 | Tmem161a      | 0.0003 | No |
| 4704 | 2810433D01Rik | 0.0003 | No |
| 4705 | Armcx2        | 0.0003 | No |
| 4706 | Gm22054       | 0.0003 | No |
| 4707 | Dnmt3a-ps1    | 0.0003 | No |
| 4708 | RP23-52K6.2   | 0.0003 | No |
| 4709 | Krtap3-2      | 0.0003 | No |
| 4710 | RP23-367D2.1  | 0.0003 | No |
| 4711 | Ttc30a2       | 0.0003 | No |
| 4712 | Rd3l          | 0.0003 | No |
| 4713 | Gm25070       | 0.0003 | No |
| 4714 | 2610509F24Rik | 0.0003 | No |
| 4715 | Olf927-ps1    | 0.0003 | No |
| 4716 | Tmem207       | 0.0003 | No |
| 4717 | Gm15575       | 0.0003 | No |
| 4718 | Gm29387       | 0.0003 | No |
| 4719 | Dsg3          | 0.0003 | No |
| 4720 | Gm15285       | 0.0003 | No |
| 4721 | Gm5339        | 0.0003 | No |
| 4722 | Krt28         | 0.0003 | No |
| 4723 | Ugt8a         | 0.0003 | No |
| 4724 | Gm44985       | 0.0003 | No |
| 4725 | Gm44254       | 0.0003 | No |
| 4726 | Gm11527       | 0.0003 | No |
| 4727 | 3110070M22Rik | 0.0003 | No |
| 4728 | Gm38275       | 0.0003 | No |
| 4729 | Nid1          | 0.0003 | No |
| 4730 | Rps13-ps2     | 0.0003 | No |
| 4731 | RP23-35O24.1  | 0.0003 | No |
| 4732 | Gm17911       | 0.0003 | No |
| 4733 | Gm14218       | 0.0003 | No |
| 4734 | Gm10961       | 0.0003 | No |
| 4735 | A230065N10Rik | 0.0003 | No |

|      |               |        |    |
|------|---------------|--------|----|
| 4736 | Mir3074-1     | 0.0003 | No |
| 4737 | Gm12904       | 0.0003 | No |
| 4738 | Ccdc117       | 0.0003 | No |
| 4739 | Atp5c1        | 0.0003 | No |
| 4740 | Mapk15        | 0.0003 | No |
| 4741 | Gm16485       | 0.0003 | No |
| 4742 | Apc           | 0.0003 | No |
| 4743 | Gm13579       | 0.0003 | No |
| 4744 | Gm4841        | 0.0003 | No |
| 4745 | Ccdc148       | 0.0003 | No |
| 4746 | RP23-159E10.1 | 0.0003 | No |
| 4747 | Mir7086       | 0.0003 | No |
| 4748 | Gm45294       | 0.0003 | No |
| 4749 | Gm11782       | 0.0003 | No |
| 4750 | Vtn           | 0.0003 | No |
| 4751 | Tnni3k        | 0.0003 | No |
| 4752 | Mmrn1         | 0.0003 | No |
| 4753 | Tmem211       | 0.0003 | No |
| 4754 | Gm28269       | 0.0003 | No |
| 4755 | Irx1          | 0.0003 | No |
| 4756 | Gm13163       | 0.0003 | No |
| 4757 | Trav12-2      | 0.0003 | No |
| 4758 | Gm26747       | 0.0003 | No |
| 4759 | Gm16585       | 0.0003 | No |
| 4760 | 9430002A10Rik | 0.0003 | No |
| 4761 | Cacna1b       | 0.0003 | No |
| 4762 | Fbxw20        | 0.0003 | No |
| 4763 | Klk1b22       | 0.0003 | No |
| 4764 | Mir6412       | 0.0003 | No |
| 4765 | 9330132A10Rik | 0.0003 | No |
| 4766 | Gm7463        | 0.0003 | No |
| 4767 | Tex13         | 0.0003 | No |
| 4768 | Trav3-4       | 0.0003 | No |
| 4769 | Gm18303       | 0.0003 | No |
| 4770 | Gm16056       | 0.0003 | No |
| 4771 | 4933425D22Rik | 0.0003 | No |
| 4772 | Gm43624       | 0.0003 | No |
| 4773 | Ptpr          | 0.0003 | No |
| 4774 | Tas2r140      | 0.0003 | No |
| 4775 | Gm11864       | 0.0003 | No |
| 4776 | Gm11585       | 0.0003 | No |
| 4777 | Gm16085       | 0.0003 | No |
| 4778 | Ces2c         | 0.0003 | No |
| 4779 | Gm23896       | 0.0003 | No |
| 4780 | Glp2r         | 0.0003 | No |
| 4781 | Rpl9-ps9      | 0.0003 | No |



|      |               |        |    |
|------|---------------|--------|----|
| 4782 | Mir695        | 0.0003 | No |
| 4783 | Gm17841       | 0.0003 | No |
| 4784 | Rasal3        | 0.0003 | No |
| 4785 | Gm24011       | 0.0003 | No |
| 4786 | Zfpm1         | 0.0003 | No |
| 4787 | Olfir239      | 0.0003 | No |
| 4788 | A930018P22Rik | 0.0003 | No |
| 4789 | Snord88c      | 0.0003 | No |
| 4790 | Gm8865        | 0.0003 | No |
| 4791 | Defb19        | 0.0003 | No |
| 4792 | Rpp25         | 0.0003 | No |
| 4793 | 5430433H01Rik | 0.0003 | No |
| 4794 | Ndst4         | 0.0003 | No |
| 4795 | RP24-300B21.1 | 0.0003 | No |
| 4796 | Olfir461      | 0.0003 | No |
| 4797 | BC028777      | 0.0003 | No |
| 4798 | Igfbp3        | 0.0003 | No |
| 4799 | Slc25a38      | 0.0003 | No |
| 4800 | Gm42592       | 0.0003 | No |
| 4801 | Supt5         | 0.0003 | No |
| 4802 | Pqbp1         | 0.0003 | No |
| 4803 | Gm12126       | 0.0003 | No |
| 4804 | Gm24893       | 0.0003 | No |
| 4805 | Mir1190       | 0.0003 | No |
| 4806 | Gm13855       | 0.0003 | No |
| 4807 | Gm14455       | 0.0002 | No |
| 4808 | 4930443O20Rik | 0.0002 | No |
| 4809 | Smco1         | 0.0002 | No |
| 4810 | Gm29067       | 0.0002 | No |
| 4811 | Gm16262       | 0.0002 | No |
| 4812 | Cxcl3         | 0.0002 | No |
| 4813 | Mir684-2      | 0.0002 | No |
| 4814 | B930018H19Rik | 0.0002 | No |
| 4815 | Ly6g6d        | 0.0002 | No |
| 4816 | Gm15658       | 0.0002 | No |
| 4817 | Olfir762-ps1  | 0.0002 | No |
| 4818 | Gm27970       | 0.0002 | No |
| 4819 | Peg12         | 0.0002 | No |
| 4820 | BC100451      | 0.0002 | No |
| 4821 | RP23-123D6.12 | 0.0002 | No |
| 4822 | Gm14461       | 0.0002 | No |
| 4823 | Gm45449       | 0.0002 | No |
| 4824 | Mir669b       | 0.0002 | No |
| 4825 | Gm4644        | 0.0002 | No |
| 4826 | Gm28078       | 0.0002 | No |
| 4827 | Gm44049       | 0.0002 | No |

|      |               |        |    |
|------|---------------|--------|----|
| 4828 | Tpbpb         | 0.0002 | No |
| 4829 | Gm34086       | 0.0002 | No |
| 4830 | Sox15         | 0.0002 | No |
| 4831 | Gm43973       | 0.0002 | No |
| 4832 | Gm23583       | 0.0002 | No |
| 4833 | Gja4          | 0.0002 | No |
| 4834 | Gm17196       | 0.0002 | No |
| 4835 | Gm28724       | 0.0002 | No |
| 4836 | Gm2796        | 0.0002 | No |
| 4837 | Raver1        | 0.0002 | No |
| 4838 | Sar1b         | 0.0002 | No |
| 4839 | Gm16300       | 0.0002 | No |
| 4840 | Guca1b        | 0.0002 | No |
| 4841 | Klk1b2-ps     | 0.0002 | No |
| 4842 | Lpcat1        | 0.0002 | No |
| 4843 | Gm43826       | 0.0002 | No |
| 4844 | Adat3         | 0.0002 | No |
| 4845 | Adgrb3        | 0.0002 | No |
| 4846 | C130023A14Rik | 0.0002 | No |
| 4847 | Taar6         | 0.0002 | No |
| 4848 | Trpc5os       | 0.0002 | No |
| 4849 | Gm17743       | 0.0002 | No |
| 4850 | Traj57        | 0.0002 | No |
| 4851 | Vmn1r-ps9     | 0.0002 | No |
| 4852 | Retnla        | 0.0002 | No |
| 4853 | Gm44626       | 0.0002 | No |
| 4854 | Sdhaf1        | 0.0002 | No |
| 4855 | 4933402N03Rik | 0.0002 | No |
| 4856 | Gm6181        | 0.0002 | No |
| 4857 | Anks4b        | 0.0002 | No |
| 4858 | Gm28769       | 0.0002 | No |
| 4859 | Npbwr1        | 0.0002 | No |
| 4860 | Gm38285       | 0.0002 | No |
| 4861 | Klk1b1        | 0.0002 | No |
| 4862 | Gm5150        | 0.0002 | No |
| 4863 | Pfn3          | 0.0002 | No |
| 4864 | Vsig4         | 0.0002 | No |
| 4865 | Gab3          | 0.0002 | No |
| 4866 | Fzd9          | 0.0002 | No |
| 4867 | 2410018L13Rik | 0.0002 | No |
| 4868 | Wls           | 0.0002 | No |
| 4869 | Gm27187       | 0.0002 | No |
| 4870 | Cpn2          | 0.0002 | No |
| 4871 | Krt90         | 0.0002 | No |
| 4872 | Arhgap5       | 0.0002 | No |
| 4873 | Gm44834       | 0.0002 | No |

|      |               |        |    |
|------|---------------|--------|----|
| 4874 | Gm6471        | 0.0002 | No |
| 4875 | Lce3d         | 0.0002 | No |
| 4876 | Gm43458       | 0.0002 | No |
| 4877 | Mir15b        | 0.0002 | No |
| 4878 | Gm11756       | 0.0002 | No |
| 4879 | Gm12584       | 0.0002 | No |
| 4880 | Tnk1          | 0.0002 | No |
| 4881 | Mob3c         | 0.0002 | No |
| 4882 | Vgll1         | 0.0002 | No |
| 4883 | Faiml         | 0.0002 | No |
| 4884 | Gm16221       | 0.0002 | No |
| 4885 | Gm8089        | 0.0002 | No |
| 4886 | Irs3          | 0.0002 | No |
| 4887 | Gm14226       | 0.0002 | No |
| 4888 | Abo           | 0.0002 | No |
| 4889 | D130004A15Rik | 0.0002 | No |
| 4890 | Gm17174       | 0.0002 | No |
| 4891 | Hoxd9         | 0.0002 | No |
| 4892 | Mcoln3        | 0.0002 | No |
| 4893 | Gm14035       | 0.0002 | No |
| 4894 | Gm42695       | 0.0002 | No |
| 4895 | Got1l1        | 0.0002 | No |
| 4896 | Gm29524       | 0.0002 | No |
| 4897 | Arvcf         | 0.0002 | No |
| 4898 | Mageb17-ps    | 0.0002 | No |
| 4899 | Glg1          | 0.0002 | No |
| 4900 | Gm16177       | 0.0002 | No |
| 4901 | Gm38379       | 0.0002 | No |
| 4902 | Rbks          | 0.0002 | No |
| 4903 | Btf3          | 0.0002 | No |
| 4904 | Ighv1-48      | 0.0002 | No |
| 4905 | Olfir799      | 0.0002 | No |
| 4906 | Gm44556       | 0.0002 | No |
| 4907 | Cth           | 0.0002 | No |
| 4908 | Gm44080       | 0.0002 | No |
| 4909 | Rassf1        | 0.0002 | No |
| 4910 | Gm37861       | 0.0002 | No |
| 4911 | 2010308F09Rik | 0.0002 | No |
| 4912 | Gm12245       | 0.0002 | No |
| 4913 | Pcsk2os2      | 0.0002 | No |
| 4914 | Erc2          | 0.0002 | No |
| 4915 | Gm43622       | 0.0002 | No |
| 4916 | Gm14921       | 0.0002 | No |
| 4917 | Gm43126       | 0.0002 | No |
| 4918 | Csk           | 0.0002 | No |
| 4919 | Pvrig-ps      | 0.0002 | No |

|      |               |        |    |
|------|---------------|--------|----|
| 4920 | Tbc1d2b       | 0.0002 | No |
| 4921 | Gm31784       | 0.0002 | No |
| 4922 | Nlrp3         | 0.0002 | No |
| 4923 | Ankrd54       | 0.0002 | No |
| 4924 | 1500009C09Rik | 0.0002 | No |
| 4925 | Gm12833       | 0.0002 | No |
| 4926 | 1700007F19Rik | 0.0002 | No |
| 4927 | Gm25448       | 0.0002 | No |
| 4928 | Vmn2r117      | 0.0002 | No |
| 4929 | Cnn3          | 0.0002 | No |
| 4930 | Gm16968       | 0.0002 | No |
| 4931 | Il17rc        | 0.0002 | No |
| 4932 | Gm15372       | 0.0002 | No |
| 4933 | Gal3st3       | 0.0002 | No |
| 4934 | Acp2          | 0.0002 | No |
| 4935 | Gm22965       | 0.0002 | No |
| 4936 | RP23-101D11.3 | 0.0002 | No |
| 4937 | Gm23493       | 0.0002 | No |
| 4938 | Gm3841        | 0.0002 | No |
| 4939 | Zfp326        | 0.0002 | No |
| 4940 | Gm20447       | 0.0002 | No |
| 4941 | Gm26907       | 0.0002 | No |
| 4942 | Olfir937      | 0.0002 | No |
| 4943 | Gm42710       | 0.0002 | No |
| 4944 | Gm16305       | 0.0002 | No |
| 4945 | Gm34411       | 0.0002 | No |
| 4946 | 4930587A21Rik | 0.0002 | No |
| 4947 | Gm12196       | 0.0002 | No |
| 4948 | Llph-ps1      | 0.0002 | No |
| 4949 | Lats2         | 0.0002 | No |
| 4950 | Gm11713       | 0.0002 | No |
| 4951 | Wdr20rt       | 0.0002 | No |
| 4952 | Gm13874       | 0.0002 | No |
| 4953 | Gck           | 0.0002 | No |
| 4954 | Olfir71       | 0.0002 | No |
| 4955 | Rtkn          | 0.0002 | No |
| 4956 | Gm42463       | 0.0002 | No |
| 4957 | Gm25896       | 0.0002 | No |
| 4958 | Hpgd          | 0.0002 | No |
| 4959 | Fbln2         | 0.0002 | No |
| 4960 | Ceacam10      | 0.0002 | No |
| 4961 | Ighv8-14      | 0.0002 | No |
| 4962 | Olfir924      | 0.0002 | No |
| 4963 | Gm590         | 0.0002 | No |
| 4964 | Gm15075       | 0.0002 | No |
| 4965 | Gm13827       | 0.0002 | No |

|      |               |        |    |
|------|---------------|--------|----|
| 4966 | Trim63        | 0.0002 | No |
| 4967 | Lgals8        | 0.0002 | No |
| 4968 | Akap2         | 0.0002 | No |
| 4969 | H2-Q3         | 0.0002 | No |
| 4970 | Gm26953       | 0.0002 | No |
| 4971 | Slc6a4        | 0.0002 | No |
| 4972 | Antxrl        | 0.0002 | No |
| 4973 | Gm15729       | 0.0002 | No |
| 4974 | Gm11809       | 0.0002 | No |
| 4975 | Tc2n          | 0.0002 | No |
| 4976 | Mir22hg       | 0.0002 | No |
| 4977 | Unc5cl        | 0.0002 | No |
| 4978 | Mertk         | 0.0002 | No |
| 4979 | Opalin        | 0.0002 | No |
| 4980 | Gm14936       | 0.0002 | No |
| 4981 | Igkv2-95-2    | 0.0002 | No |
| 4982 | Gm10862       | 0.0002 | No |
| 4983 | Gm42753       | 0.0002 | No |
| 4984 | Muc4          | 0.0002 | No |
| 4985 | Slc22a28      | 0.0002 | No |
| 4986 | Gm37051       | 0.0002 | No |
| 4987 | Gm37260       | 0.0002 | No |
| 4988 | Gm37257       | 0.0002 | No |
| 4989 | Tmem51        | 0.0002 | No |
| 4990 | Adgre1        | 0.0002 | No |
| 4991 | Gm43590       | 0.0002 | No |
| 4992 | Trav14-1      | 0.0002 | No |
| 4993 | Gm44667       | 0.0002 | No |
| 4994 | Trav7-1       | 0.0002 | No |
| 4995 | Ttc28         | 0.0002 | No |
| 4996 | Zc2hc1c       | 0.0002 | No |
| 4997 | Klra13-ps     | 0.0002 | No |
| 4998 | Gm31816       | 0.0002 | No |
| 4999 | Olfr65        | 0.0002 | No |
| 5000 | Gm27201       | 0.0002 | No |
| 5001 | Gm26759       | 0.0002 | No |
| 5002 | Gm12102       | 0.0002 | No |
| 5003 | Gm16195       | 0.0002 | No |
| 5004 | Gm6458        | 0.0002 | No |
| 5005 | F11r          | 0.0002 | No |
| 5006 | Mir7077       | 0.0002 | No |
| 5007 | 4933403L11Rik | 0.0002 | No |
| 5008 | Ehmt2         | 0.0002 | No |
| 5009 | Scx           | 0.0002 | No |
| 5010 | Gm14591       | 0.0002 | No |
| 5011 | Saxo2         | 0.0002 | No |

|      |               |        |    |
|------|---------------|--------|----|
| 5012 | Fech          | 0.0002 | No |
| 5013 | Gm22587       | 0.0002 | No |
| 5014 | Lrrn3         | 0.0002 | No |
| 5015 | Gm20752       | 0.0002 | No |
| 5016 | Gm42942       | 0.0002 | No |
| 5017 | Mir8095       | 0.0002 | No |
| 5018 | Olfir306-ps1  | 0.0002 | No |
| 5019 | Mir130a       | 0.0002 | No |
| 5020 | Gssos2        | 0.0002 | No |
| 5021 | Gm45519       | 0.0002 | No |
| 5022 | Gm14328       | 0.0002 | No |
| 5023 | Pgpep11       | 0.0002 | No |
| 5024 | Gm44174       | 0.0002 | No |
| 5025 | Gm16399       | 0.0002 | No |
| 5026 | Gm13781       | 0.0002 | No |
| 5027 | Gm45451       | 0.0002 | No |
| 5028 | 4930571K23Rik | 0.0002 | No |
| 5029 | Gja10         | 0.0002 | No |
| 5030 | 1700072G22Rik | 0.0002 | No |
| 5031 | Gm8182        | 0.0002 | No |
| 5032 | Zdhhc12       | 0.0002 | No |
| 5033 | Myh4          | 0.0002 | No |
| 5034 | Gm23864       | 0.0002 | No |
| 5035 | Gm29241       | 0.0002 | No |
| 5036 | Gm12869       | 0.0002 | No |
| 5037 | Fgf3          | 0.0002 | No |
| 5038 | Zfp516        | 0.0002 | No |
| 5039 | Gm36961       | 0.0002 | No |
| 5040 | Gm43608       | 0.0002 | No |
| 5041 | Cacnb3        | 0.0002 | No |
| 5042 | Nrbp2         | 0.0002 | No |
| 5043 | Gm12974       | 0.0002 | No |
| 5044 | Greb1         | 0.0002 | No |
| 5045 | Gm24622       | 0.0002 | No |
| 5046 | Prss45        | 0.0002 | No |
| 5047 | Tref1         | 0.0002 | No |
| 5048 | Gm3848        | 0.0002 | No |
| 5049 | Gm22657       | 0.0002 | No |
| 5050 | Olfir1333     | 0.0002 | No |
| 5051 | Spr2b         | 0.0002 | No |
| 5052 | Ighv3-3       | 0.0002 | No |
| 5053 | Gm23973       | 0.0002 | No |
| 5054 | Gm13713       | 0.0002 | No |
| 5055 | Gm30524       | 0.0002 | No |
| 5056 | Capn1         | 0.0002 | No |
| 5057 | Gm35202       | 0.0002 | No |

|      |               |        |    |
|------|---------------|--------|----|
| 5058 | RP23-290L7.4  | 0.0002 | No |
| 5059 | Gm16289       | 0.0002 | No |
| 5060 | RP23-158K20.4 | 0.0002 | No |
| 5061 | Atoh7         | 0.0002 | No |
| 5062 | Trmt112-ps1   | 0.0002 | No |
| 5063 | Gm8745        | 0.0002 | No |
| 5064 | Gm16685       | 0.0002 | No |
| 5065 | 9530056K15Rik | 0.0002 | No |
| 5066 | Gm42550       | 0.0002 | No |
| 5067 | Scgb1b27      | 0.0002 | No |
| 5068 | Cebpe         | 0.0002 | No |
| 5069 | Thegl         | 0.0002 | No |
| 5070 | Gm16436       | 0.0002 | No |
| 5071 | Gm9025        | 0.0002 | No |
| 5072 | Gm13469       | 0.0002 | No |
| 5073 | Gm44770       | 0.0002 | No |
| 5074 | Gm38330       | 0.0002 | No |
| 5075 | Pate1         | 0.0002 | No |
| 5076 | Gm9242        | 0.0002 | No |
| 5077 | Nphs1os       | 0.0002 | No |
| 5078 | Gm2479        | 0.0002 | No |
| 5079 | Pcdha7        | 0.0002 | No |
| 5080 | Lipi          | 0.0002 | No |
| 5081 | Gm7190        | 0.0002 | No |
| 5082 | 4930586N03Rik | 0.0002 | No |
| 5083 | Try5          | 0.0002 | No |
| 5084 | Rpl10-ps6     | 0.0002 | No |
| 5085 | Gm28199       | 0.0002 | No |
| 5086 | Gm42500       | 0.0002 | No |
| 5087 | 4930525G20Rik | 0.0002 | No |
| 5088 | Gpr157        | 0.0002 | No |
| 5089 | Gm26346       | 0.0002 | No |
| 5090 | 4932413F04Rik | 0.0002 | No |
| 5091 | Slc16a7       | 0.0002 | No |
| 5092 | Mir7661       | 0.0002 | No |
| 5093 | Gm15198       | 0.0002 | No |
| 5094 | Arap1         | 0.0002 | No |
| 5095 | Gm8890        | 0.0002 | No |
| 5096 | Pomgnt2       | 0.0002 | No |
| 5097 | Gm42902       | 0.0002 | No |
| 5098 | Gm16534       | 0.0002 | No |
| 5099 | Gpr15         | 0.0002 | No |
| 5100 | Igkv13-57-2   | 0.0002 | No |
| 5101 | Gm25069       | 0.0002 | No |
| 5102 | Gm13560       | 0.0002 | No |
| 5103 | Gm26555       | 0.0002 | No |

|      |               |        |    |
|------|---------------|--------|----|
| 5104 | Obox3-ps5     | 0.0002 | No |
| 5105 | Lmtk2         | 0.0002 | No |
| 5106 | Gm8939        | 0.0002 | No |
| 5107 | 4933402C06Rik | 0.0002 | No |
| 5108 | Gm10376       | 0.0002 | No |
| 5109 | Pou4f2        | 0.0002 | No |
| 5110 | Vmn1r-ps12    | 0.0002 | No |
| 5111 | Gm14055       | 0.0002 | No |
| 5112 | WI1-648A4.1   | 0.0002 | No |
| 5113 | Sorbs2        | 0.0002 | No |
| 5114 | Gm9009        | 0.0002 | No |
| 5115 | Vmn2r122      | 0.0002 | No |
| 5116 | Gm16093       | 0.0002 | No |
| 5117 | Gm24515       | 0.0002 | No |
| 5118 | Gm26479       | 0.0002 | No |
| 5119 | Gm37727       | 0.0002 | No |
| 5120 | Gm15553       | 0.0002 | No |
| 5121 | Gm15155       | 0.0002 | No |
| 5122 | Gm15528       | 0.0002 | No |
| 5123 | Mir7007       | 0.0002 | No |
| 5124 | Gm29141       | 0.0002 | No |
| 5125 | Mcpt2         | 0.0002 | No |
| 5126 | Olf1357       | 0.0002 | No |
| 5127 | Gm3667        | 0.0002 | No |
| 5128 | Gm996         | 0.0002 | No |
| 5129 | Gm15799       | 0.0002 | No |
| 5130 | Gm13794       | 0.0002 | No |
| 5131 | Ak3l2-ps      | 0.0002 | No |
| 5132 | A730032A03Rik | 0.0002 | No |
| 5133 | Gm26363       | 0.0002 | No |
| 5134 | Gm43658       | 0.0002 | No |
| 5135 | Glt28d2       | 0.0002 | No |
| 5136 | Gm7893        | 0.0002 | No |
| 5137 | Ooep          | 0.0002 | No |
| 5138 | Opn5          | 0.0002 | No |
| 5139 | Gm43100       | 0.0002 | No |
| 5140 | 1700015G11Rik | 0.0002 | No |
| 5141 | Gm24342       | 0.0002 | No |
| 5142 | Trav16d-dv11  | 0.0002 | No |
| 5143 | Olf1808       | 0.0002 | No |
| 5144 | AC133103.6    | 0.0002 | No |
| 5145 | Traj39        | 0.0002 | No |
| 5146 | Gm24593       | 0.0002 | No |
| 5147 | Gm44615       | 0.0002 | No |
| 5148 | Dkk4          | 0.0002 | No |
| 5149 | 1700064M15Rik | 0.0002 | No |



|      |                |        |    |
|------|----------------|--------|----|
| 5150 | 4921508D12Rik  | 0.0002 | No |
| 5151 | Thbd           | 0.0002 | No |
| 5152 | Gm20644        | 0.0002 | No |
| 5153 | Olfr1387       | 0.0002 | No |
| 5154 | Vmn2r-ps86     | 0.0002 | No |
| 5155 | Traj29         | 0.0002 | No |
| 5156 | Clip2          | 0.0002 | No |
| 5157 | Gm16246        | 0.0002 | No |
| 5158 | 2410021H03Rik  | 0.0002 | No |
| 5159 | Gm11462        | 0.0002 | No |
| 5160 | Trav15-1-dv6-1 | 0.0002 | No |
| 5161 | Lrrc46         | 0.0002 | No |
| 5162 | Gm7746         | 0.0002 | No |
| 5163 | Gm11646        | 0.0002 | No |
| 5164 | Gm15762        | 0.0002 | No |
| 5165 | Gm5809         | 0.0002 | No |
| 5166 | Gm11384        | 0.0002 | No |
| 5167 | Gm28826        | 0.0002 | No |
| 5168 | Trbv22         | 0.0002 | No |
| 5169 | Gm42933        | 0.0002 | No |
| 5170 | Sftpa1         | 0.0002 | No |
| 5171 | Calml3         | 0.0002 | No |
| 5172 | Gm15160        | 0.0002 | No |
| 5173 | Gm12972        | 0.0002 | No |
| 5174 | Traj5          | 0.0002 | No |
| 5175 | Arrdc5         | 0.0002 | No |
| 5176 | Arhgef19       | 0.0002 | No |
| 5177 | Olfr1555-ps1   | 0.0002 | No |
| 5178 | Gm25886        | 0.0002 | No |
| 5179 | Mir301         | 0.0002 | No |
| 5180 | Gzmn           | 0.0002 | No |
| 5181 | 1500005C15Rik  | 0.0002 | No |
| 5182 | RP24-94F12.3   | 0.0002 | No |
| 5183 | Platr26        | 0.0002 | No |
| 5184 | Gm6270         | 0.0002 | No |
| 5185 | Rapgef4os3     | 0.0002 | No |
| 5186 | Gm16139        | 0.0002 | No |
| 5187 | 4833427G06Rik  | 0.0002 | No |
| 5188 | Sln            | 0.0002 | No |
| 5189 | Gm13388        | 0.0002 | No |
| 5190 | Zfp804a        | 0.0002 | No |
| 5191 | Tctvl1         | 0.0002 | No |
| 5192 | Gm24503        | 0.0002 | No |
| 5193 | Serpina3i      | 0.0002 | No |
| 5194 | Lcn11          | 0.0002 | No |
| 5195 | Gm22766        | 0.0002 | No |

|      |               |        |    |
|------|---------------|--------|----|
| 5196 | Gm20501       | 0.0002 | No |
| 5197 | 4930596I21Rik | 0.0002 | No |
| 5198 | Gm25867       | 0.0002 | No |
| 5199 | Gm23908       | 0.0002 | No |
| 5200 | Gm42468       | 0.0002 | No |
| 5201 | Mir669i       | 0.0002 | No |
| 5202 | Gm7341        | 0.0002 | No |
| 5203 | RP23-177D16.3 | 0.0002 | No |
| 5204 | Vmn2r120      | 0.0002 | No |
| 5205 | Gm24384       | 0.0002 | No |
| 5206 | Gm7808        | 0.0002 | No |
| 5207 | Gm42536       | 0.0002 | No |
| 5208 | Gm7048        | 0.0002 | No |
| 5209 | Gm8281        | 0.0002 | No |
| 5210 | Gm21013       | 0.0002 | No |
| 5211 | Olfr1166      | 0.0002 | No |
| 5212 | Rpl31-ps16    | 0.0002 | No |
| 5213 | Birc7         | 0.0002 | No |
| 5214 | Rpl36-ps8     | 0.0002 | No |
| 5215 | Lrrc75b       | 0.0002 | No |
| 5216 | Trav9n-1      | 0.0002 | No |
| 5217 | Trav9d-1      | 0.0002 | No |
| 5218 | Gm17455       | 0.0002 | No |
| 5219 | Gm24183       | 0.0002 | No |
| 5220 | Mir871        | 0.0002 | No |
| 5221 | Tln1          | 0.0002 | No |
| 5222 | Csmd1         | 0.0002 | No |
| 5223 | Tdpoz2        | 0.0002 | No |
| 5224 | Gm4605        | 0.0002 | No |
| 5225 | Mzt2          | 0.0002 | No |
| 5226 | Elmsan1       | 0.0002 | No |
| 5227 | Gm44721       | 0.0002 | No |
| 5228 | Gm17847       | 0.0002 | No |
| 5229 | Traj8         | 0.0002 | No |
| 5230 | Mir7085       | 0.0002 | No |
| 5231 | Gm37082       | 0.0002 | No |
| 5232 | Gm17528       | 0.0002 | No |
| 5233 | Gm37767       | 0.0002 | No |
| 5234 | AW047730      | 0.0002 | No |
| 5235 | Rdh16         | 0.0002 | No |
| 5236 | Mmp14         | 0.0002 | No |
| 5237 | Sohlh1        | 0.0002 | No |
| 5238 | Gm24480       | 0.0002 | No |
| 5239 | Chrna10       | 0.0002 | No |
| 5240 | Gm44868       | 0.0002 | No |
| 5241 | Gm37636       | 0.0002 | No |

|      |               |        |    |
|------|---------------|--------|----|
| 5242 | Hoxd3os1      | 0.0002 | No |
| 5243 | BB187690      | 0.0002 | No |
| 5244 | Syndig1       | 0.0002 | No |
| 5245 | Gm14110       | 0.0002 | No |
| 5246 | RP24-364N7.2  | 0.0002 | No |
| 5247 | Gm13577       | 0.0002 | No |
| 5248 | Gm13829       | 0.0002 | No |
| 5249 | Gm3696        | 0.0002 | No |
| 5250 | Mab2112       | 0.0002 | No |
| 5251 | Rab33a        | 0.0002 | No |
| 5252 | Gm8391        | 0.0002 | No |
| 5253 | Gm13818       | 0.0002 | No |
| 5254 | Gm29667       | 0.0002 | No |
| 5255 | Tbx4          | 0.0002 | No |
| 5256 | Igkv15-101    | 0.0002 | No |
| 5257 | Gm26251       | 0.0002 | No |
| 5258 | 2010315B03Rik | 0.0002 | No |
| 5259 | Gm12864       | 0.0002 | No |
| 5260 | Gm25183       | 0.0002 | No |
| 5261 | Gm43898       | 0.0002 | No |
| 5262 | Zakit         | 0.0002 | No |
| 5263 | Slc15a1       | 0.0002 | No |
| 5264 | Ezh1          | 0.0002 | No |
| 5265 | Lipk          | 0.0002 | No |
| 5266 | Ablim1        | 0.0002 | No |
| 5267 | 1700108J01Rik | 0.0002 | No |
| 5268 | Chrna1os      | 0.0002 | No |
| 5269 | Gm27153       | 0.0002 | No |
| 5270 | Trbv21        | 0.0002 | No |
| 5271 | Mir1942       | 0.0002 | No |
| 5272 | Gm44949       | 0.0002 | No |
| 5273 | Gm29478       | 0.0002 | No |
| 5274 | Slc4a1        | 0.0002 | No |
| 5275 | Gm38255       | 0.0002 | No |
| 5276 | Gm45657       | 0.0002 | No |
| 5277 | Gm3642        | 0.0002 | No |
| 5278 | Cyp2d41-ps    | 0.0002 | No |
| 5279 | Gm438         | 0.0002 | No |
| 5280 | Gm5692        | 0.0002 | No |
| 5281 | Gm5749        | 0.0002 | No |
| 5282 | Usp13         | 0.0002 | No |
| 5283 | Gm16349       | 0.0002 | No |
| 5284 | Gm45496       | 0.0002 | No |
| 5285 | Zfp26         | 0.0002 | No |
| 5286 | Cdsn          | 0.0002 | No |
| 5287 | Epb4115       | 0.0002 | No |

|      |               |        |    |
|------|---------------|--------|----|
| 5288 | Gm45677       | 0.0002 | No |
| 5289 | Olfir657      | 0.0002 | No |
| 5290 | Mir674        | 0.0002 | No |
| 5291 | Cycs-ps2      | 0.0002 | No |
| 5292 | Gm25381       | 0.0002 | No |
| 5293 | Gm6223        | 0.0002 | No |
| 5294 | Sp3os         | 0.0002 | No |
| 5295 | Gm13035       | 0.0002 | No |
| 5296 | Gm12161       | 0.0002 | No |
| 5297 | Mir6939       | 0.0002 | No |
| 5298 | Gm4989        | 0.0002 | No |
| 5299 | Gm8459        | 0.0002 | No |
| 5300 | Gm15810       | 0.0002 | No |
| 5301 | Vmn1r-ps150   | 0.0002 | No |
| 5302 | Gm19461       | 0.0002 | No |
| 5303 | Stbd1         | 0.0002 | No |
| 5304 | Gm14546       | 0.0002 | No |
| 5305 | Gm7733        | 0.0002 | No |
| 5306 | Gm6124        | 0.0002 | No |
| 5307 | Gm12843       | 0.0002 | No |
| 5308 | Nlgn1         | 0.0002 | No |
| 5309 | Ubash3b       | 0.0002 | No |
| 5310 | Gm37744       | 0.0002 | No |
| 5311 | Gm12041       | 0.0002 | No |
| 5312 | Gm43465       | 0.0002 | No |
| 5313 | Gm5600        | 0.0002 | No |
| 5314 | Gm43618       | 0.0002 | No |
| 5315 | Gm43189       | 0.0002 | No |
| 5316 | Gm26691       | 0.0002 | No |
| 5317 | Kcnj16        | 0.0002 | No |
| 5318 | Arpin         | 0.0002 | No |
| 5319 | A230005M16Rik | 0.0002 | No |
| 5320 | Gm44213       | 0.0002 | No |
| 5321 | Gm27040       | 0.0002 | No |
| 5322 | Gm43870       | 0.0002 | No |
| 5323 | Gm12979       | 0.0002 | No |
| 5324 | Gm7561        | 0.0002 | No |
| 5325 | H19           | 0.0002 | No |
| 5326 | Gm43652       | 0.0002 | No |
| 5327 | Gm43248       | 0.0002 | No |
| 5328 | 1700001L19Rik | 0.0002 | No |
| 5329 | Gm43414       | 0.0002 | No |
| 5330 | Sost          | 0.0002 | No |
| 5331 | Ankrd34a      | 0.0002 | No |
| 5332 | Cbr2          | 0.0002 | No |
| 5333 | Olfir77       | 0.0002 | No |

|      |               |        |    |
|------|---------------|--------|----|
| 5334 | Gm44631       | 0.0002 | No |
| 5335 | Gm14735       | 0.0002 | No |
| 5336 | Smok4a        | 0.0002 | No |
| 5337 | Ifna2         | 0.0002 | No |
| 5338 | Fgf22         | 0.0002 | No |
| 5339 | Gm43801       | 0.0002 | No |
| 5340 | Gm43398       | 0.0002 | No |
| 5341 | Gm14817       | 0.0002 | No |
| 5342 | Gm11350       | 0.0002 | No |
| 5343 | B130006D01Rik | 0.0002 | No |
| 5344 | Dnajc5b       | 0.0002 | No |
| 5345 | Gm43004       | 0.0002 | No |
| 5346 | Gm43635       | 0.0002 | No |
| 5347 | 1700012B09Rik | 0.0002 | No |
| 5348 | Gm22951       | 0.0002 | No |
| 5349 | Gm5111        | 0.0002 | No |
| 5350 | 1110017D15Rik | 0.0002 | No |
| 5351 | RP23-247P3.4  | 0.0002 | No |
| 5352 | Gipc3         | 0.0002 | No |
| 5353 | Gm26911       | 0.0002 | No |
| 5354 | Hist1h2bf     | 0.0002 | No |
| 5355 | Ap2a1         | 0.0002 | No |
| 5356 | Gm29292       | 0.0002 | No |
| 5357 | Gm12167       | 0.0002 | No |
| 5358 | Gm42625       | 0.0002 | No |
| 5359 | Mir146        | 0.0002 | No |
| 5360 | Gm12967       | 0.0002 | No |
| 5361 | Grem2         | 0.0002 | No |
| 5362 | Gm44973       | 0.0002 | No |
| 5363 | Mmp11         | 0.0002 | No |
| 5364 | Gm45531       | 0.0002 | No |
| 5365 | Olfrl292-ps1  | 0.0002 | No |
| 5366 | 1700034O15Rik | 0.0002 | No |
| 5367 | Mapk13        | 0.0002 | No |
| 5368 | Gm30075       | 0.0002 | No |
| 5369 | Cldn34b2      | 0.0002 | No |
| 5370 | Gm19457       | 0.0002 | No |
| 5371 | Zfp518b       | 0.0002 | No |
| 5372 | Sgcg          | 0.0002 | No |
| 5373 | Gm44662       | 0.0002 | No |
| 5374 | Akr1b8        | 0.0002 | No |
| 5375 | Rpl23a-ps6    | 0.0002 | No |
| 5376 | Olfrl8        | 0.0002 | No |
| 5377 | 2210412B16Rik | 0.0002 | No |
| 5378 | Gm42653       | 0.0002 | No |
| 5379 | Gm5742        | 0.0002 | No |

|      |               |        |    |
|------|---------------|--------|----|
| 5380 | Gm43738       | 0.0002 | No |
| 5381 | Gm22383       | 0.0002 | No |
| 5382 | C1qtnf7       | 0.0002 | No |
| 5383 | Gm16459       | 0.0002 | No |
| 5384 | Foxs1         | 0.0002 | No |
| 5385 | Gm27672       | 0.0002 | No |
| 5386 | Gm42791       | 0.0002 | No |
| 5387 | Gm10253       | 0.0002 | No |
| 5388 | Ccdc129       | 0.0002 | No |
| 5389 | Gm23947       | 0.0002 | No |
| 5390 | Gm44366       | 0.0002 | No |
| 5391 | Olfrl187-ps1  | 0.0002 | No |
| 5392 | Snord118      | 0.0002 | No |
| 5393 | Gm15375       | 0.0002 | No |
| 5394 | Nkx2-3        | 0.0002 | No |
| 5395 | Gm16057       | 0.0002 | No |
| 5396 | Rnase11       | 0.0002 | No |
| 5397 | Rab9b         | 0.0002 | No |
| 5398 | Gm43506       | 0.0002 | No |
| 5399 | Gm38137       | 0.0002 | No |
| 5400 | Mir1193       | 0.0002 | No |
| 5401 | Gm18981       | 0.0002 | No |
| 5402 | Gm13770       | 0.0002 | No |
| 5403 | Car3          | 0.0002 | No |
| 5404 | Trav4-2       | 0.0002 | No |
| 5405 | Gm5407        | 0.0002 | No |
| 5406 | Inha          | 0.0002 | No |
| 5407 | Gm34767       | 0.0002 | No |
| 5408 | Gm13362       | 0.0002 | No |
| 5409 | Gm43254       | 0.0002 | No |
| 5410 | Ggt6          | 0.0002 | No |
| 5411 | Gm4792        | 0.0002 | No |
| 5412 | Gm29245       | 0.0002 | No |
| 5413 | Gm22295       | 0.0002 | No |
| 5414 | Kbtbd13       | 0.0002 | No |
| 5415 | Fev           | 0.0002 | No |
| 5416 | Gm42868       | 0.0002 | No |
| 5417 | Gm14994       | 0.0002 | No |
| 5418 | Nyap1         | 0.0002 | No |
| 5419 | C030007H22Rik | 0.0002 | No |
| 5420 | Cst10         | 0.0002 | No |
| 5421 | Gm43310       | 0.0002 | No |
| 5422 | Kat6b-ps2     | 0.0002 | No |
| 5423 | Hist1h2aj     | 0.0002 | No |
| 5424 | Gm24823       | 0.0002 | No |
| 5425 | Gm24776       | 0.0002 | No |

|      |               |        |    |
|------|---------------|--------|----|
| 5426 | Sphk1         | 0.0002 | No |
| 5427 | Gm44994       | 0.0002 | No |
| 5428 | Gm43443       | 0.0002 | No |
| 5429 | Abcb10        | 0.0002 | No |
| 5430 | Gm22701       | 0.0002 | No |
| 5431 | Gm1947        | 0.0002 | No |
| 5432 | Apln          | 0.0002 | No |
| 5433 | RP23-396C4.2  | 0.0002 | No |
| 5434 | Gm15538       | 0.0002 | No |
| 5435 | 4930426D05Rik | 0.0002 | No |
| 5436 | Olfir471      | 0.0002 | No |
| 5437 | Ftl1-ps1      | 0.0002 | No |
| 5438 | 5330439B14Rik | 0.0002 | No |
| 5439 | Gm7700        | 0.0002 | No |
| 5440 | Gm17224       | 0.0002 | No |
| 5441 | Gm94          | 0.0002 | No |
| 5442 | Gm17213       | 0.0002 | No |
| 5443 | Rpl3l         | 0.0002 | No |
| 5444 | Vmn2r72       | 0.0002 | No |
| 5445 | Gm12650       | 0.0002 | No |
| 5446 | H2-Pb         | 0.0002 | No |
| 5447 | Gm11840       | 0.0002 | No |
| 5448 | Gabbr1        | 0.0002 | No |
| 5449 | Gm14911       | 0.0002 | No |
| 5450 | Gm4691        | 0.0002 | No |
| 5451 | 1700008H02Rik | 0.0002 | No |
| 5452 | Gm6257        | 0.0002 | No |
| 5453 | Gm16617       | 0.0002 | No |
| 5454 | Gm28818       | 0.0002 | No |
| 5455 | Gm43814       | 0.0002 | No |
| 5456 | 4930518J21Rik | 0.0002 | No |
| 5457 | Gm26550       | 0.0002 | No |
| 5458 | Gpx2          | 0.0002 | No |
| 5459 | Gm30646       | 0.0002 | No |
| 5460 | Gm9772        | 0.0002 | No |
| 5461 | Cfap99        | 0.0002 | No |
| 5462 | Defa-ps10     | 0.0002 | No |
| 5463 | Gm44437       | 0.0002 | No |
| 5464 | Trav20        | 0.0002 | No |
| 5465 | Gm10644       | 0.0002 | No |
| 5466 | Olfir568      | 0.0002 | No |
| 5467 | Gm15033       | 0.0002 | No |
| 5468 | Nmral1        | 0.0002 | No |
| 5469 | Gm5381        | 0.0002 | No |
| 5470 | Terc          | 0.0002 | No |
| 5471 | Cabp1         | 0.0002 | No |

|      |               |        |    |
|------|---------------|--------|----|
| 5472 | Gm8181        | 0.0002 | No |
| 5473 | Vmn1r57       | 0.0002 | No |
| 5474 | Ifna15        | 0.0002 | No |
| 5475 | Lox           | 0.0002 | No |
| 5476 | Gm29718       | 0.0002 | No |
| 5477 | Gm44869       | 0.0002 | No |
| 5478 | Pafah1b1-ps2  | 0.0002 | No |
| 5479 | Gm10344       | 0.0002 | No |
| 5480 | Gm37936       | 0.0002 | No |
| 5481 | Pmis2         | 0.0002 | No |
| 5482 | Gm16342       | 0.0002 | No |
| 5483 | Smad6         | 0.0002 | No |
| 5484 | Gm42812       | 0.0002 | No |
| 5485 | Zfp989        | 0.0002 | No |
| 5486 | Retnlb        | 0.0002 | No |
| 5487 | Pgam1-ps2     | 0.0002 | No |
| 5488 | Gm15410       | 0.0002 | No |
| 5489 | Arl4aos       | 0.0002 | No |
| 5490 | Gm7145        | 0.0002 | No |
| 5491 | Olfir39       | 0.0002 | No |
| 5492 | Gm45318       | 0.0002 | No |
| 5493 | Gm23186       | 0.0002 | No |
| 5494 | Gm31105       | 0.0002 | No |
| 5495 | Arid3c        | 0.0002 | No |
| 5496 | Gm12475       | 0.0002 | No |
| 5497 | Gm12762       | 0.0002 | No |
| 5498 | Gm44351       | 0.0002 | No |
| 5499 | RP23-143D12.3 | 0.0002 | No |
| 5500 | Olfir458      | 0.0002 | No |
| 5501 | Nme5          | 0.0002 | No |
| 5502 | Gm42951       | 0.0002 | No |
| 5503 | Vma21-ps      | 0.0002 | No |
| 5504 | Gm14032       | 0.0002 | No |
| 5505 | Gm12459       | 0.0002 | No |
| 5506 | Gm9910        | 0.0002 | No |
| 5507 | Gm24330       | 0.0002 | No |
| 5508 | Mageh1        | 0.0002 | No |
| 5509 | Gm23435       | 0.0002 | No |
| 5510 | Gm11665       | 0.0002 | No |
| 5511 | Pgf           | 0.0002 | No |
| 5512 | Vmn2r-ps139   | 0.0002 | No |
| 5513 | Gm10092       | 0.0002 | No |
| 5514 | Slitrk2       | 0.0002 | No |
| 5515 | Gm18748       | 0.0002 | No |
| 5516 | Gm14237       | 0.0002 | No |
| 5517 | Gm22475       | 0.0002 | No |



|      |               |        |    |
|------|---------------|--------|----|
| 5518 | Gtsf1         | 0.0002 | No |
| 5519 | Dpf1          | 0.0002 | No |
| 5520 | Zscan5b       | 0.0002 | No |
| 5521 | Gm6091        | 0.0002 | No |
| 5522 | Csprs         | 0.0002 | No |
| 5523 | Ttpa          | 0.0002 | No |
| 5524 | Npy1r         | 0.0002 | No |
| 5525 | Gm25394       | 0.0002 | No |
| 5526 | Chrm2         | 0.0002 | No |
| 5527 | 2300002M23Rik | 0.0002 | No |
| 5528 | Gm10912       | 0.0002 | No |
| 5529 | 5033423K11Rik | 0.0002 | No |
| 5530 | Trav12-3      | 0.0002 | No |
| 5531 | Nctc1         | 0.0002 | No |
| 5532 | RP23-405E15.2 | 0.0002 | No |
| 5533 | Gm13541       | 0.0002 | No |
| 5534 | RP23-9A12.5   | 0.0002 | No |
| 5535 | Olf1497       | 0.0002 | No |
| 5536 | Gm28686       | 0.0002 | No |
| 5537 | Tspan2os      | 0.0002 | No |
| 5538 | Ticam1        | 0.0002 | No |
| 5539 | Gm17229       | 0.0002 | No |
| 5540 | Gm26954       | 0.0002 | No |
| 5541 | Rhbd11        | 0.0002 | No |
| 5542 | Gm16186       | 0.0002 | No |
| 5543 | Zfp711        | 0.0002 | No |
| 5544 | Gm14156       | 0.0002 | No |
| 5545 | Tpd5211       | 0.0002 | No |
| 5546 | Gm25057       | 0.0002 | No |
| 5547 | Gm5619        | 0.0002 | No |
| 5548 | 1700003P14Rik | 0.0002 | No |
| 5549 | Gm4926        | 0.0002 | No |
| 5550 | Gprc5a        | 0.0002 | No |
| 5551 | Pitx2         | 0.0002 | No |
| 5552 | Gm5181        | 0.0002 | No |
| 5553 | Gm14530       | 0.0002 | No |
| 5554 | Gm13778       | 0.0002 | No |
| 5555 | Nmur1         | 0.0002 | No |
| 5556 | Gm5268        | 0.0002 | No |
| 5557 | Rab5a-ps      | 0.0002 | No |
| 5558 | Gm25915       | 0.0002 | No |
| 5559 | Gm42582       | 0.0002 | No |
| 5560 | Gm11465       | 0.0002 | No |
| 5561 | Nptxr         | 0.0002 | No |
| 5562 | Gtpbp4-ps5    | 0.0002 | No |
| 5563 | Mospd4        | 0.0002 | No |

|      |               |        |    |
|------|---------------|--------|----|
| 5564 | Gm38328       | 0.0002 | No |
| 5565 | Gm13495       | 0.0002 | No |
| 5566 | Gm9266        | 0.0002 | No |
| 5567 | Gm42815       | 0.0002 | No |
| 5568 | Gm37750       | 0.0002 | No |
| 5569 | Gm5420        | 0.0002 | No |
| 5570 | Gm45591       | 0.0002 | No |
| 5571 | Gm42831       | 0.0002 | No |
| 5572 | RP24-151D4.1  | 0.0002 | No |
| 5573 | Trav8n-2      | 0.0002 | No |
| 5574 | Gm26812       | 0.0002 | No |
| 5575 | Olfr953-ps1   | 0.0002 | No |
| 5576 | Pklr          | 0.0002 | No |
| 5577 | Spint4        | 0.0002 | No |
| 5578 | Gm25420       | 0.0002 | No |
| 5579 | RP23-145G7.2  | 0.0002 | No |
| 5580 | Olfr1420      | 0.0002 | No |
| 5581 | Gm29094       | 0.0002 | No |
| 5582 | Gm10750       | 0.0002 | No |
| 5583 | Gm23805       | 0.0002 | No |
| 5584 | Gm17797       | 0.0002 | No |
| 5585 | Gm5415        | 0.0002 | No |
| 5586 | Cyp7a1        | 0.0002 | No |
| 5587 | Map4k2        | 0.0002 | No |
| 5588 | Olfr1507      | 0.0002 | No |
| 5589 | Gm43384       | 0.0002 | No |
| 5590 | Fam179a       | 0.0002 | No |
| 5591 | RP23-193N1.1  | 0.0002 | No |
| 5592 | Cfc1          | 0.0002 | No |
| 5593 | Efnal         | 0.0002 | No |
| 5594 | Gm12080       | 0.0002 | No |
| 5595 | RP23-346D17.3 | 0.0002 | No |
| 5596 | Gm44516       | 0.0002 | No |
| 5597 | Pla2g1b       | 0.0002 | No |
| 5598 | Trpv4         | 0.0002 | No |
| 5599 | Tnnc1         | 0.0002 | No |
| 5600 | E330011M16Rik | 0.0002 | No |
| 5601 | Foxn1         | 0.0002 | No |
| 5602 | Gm15241       | 0.0002 | No |
| 5603 | Gm12943       | 0.0002 | No |
| 5604 | Gm12936       | 0.0002 | No |
| 5605 | Trav8d-2      | 0.0002 | No |
| 5606 | Vmn1r-ps60    | 0.0002 | No |
| 5607 | Gpr142        | 0.0002 | No |
| 5608 | 4833428L15Rik | 0.0002 | No |
| 5609 | Gm44665       | 0.0002 | No |

|      |               |        |    |
|------|---------------|--------|----|
| 5610 | Gm11730       | 0.0002 | No |
| 5611 | Traj30        | 0.0002 | No |
| 5612 | Gm44854       | 0.0002 | No |
| 5613 | Gm37150       | 0.0002 | No |
| 5614 | Gm43780       | 0.0002 | No |
| 5615 | Gm44641       | 0.0002 | No |
| 5616 | AI429214      | 0.0002 | No |
| 5617 | Gm37803       | 0.0002 | No |
| 5618 | Gm17333       | 0.0002 | No |
| 5619 | Gm12826       | 0.0002 | No |
| 5620 | Aqp1          | 0.0002 | No |
| 5621 | Gm44675       | 0.0002 | No |
| 5622 | 1700047G03Rik | 0.0002 | No |
| 5623 | Enho          | 0.0002 | No |
| 5624 | Gm11744       | 0.0002 | No |
| 5625 | Gm38331       | 0.0002 | No |
| 5626 | Gm11505       | 0.0002 | No |
| 5627 | Kcnk12        | 0.0002 | No |
| 5628 | Gm8907        | 0.0001 | No |
| 5629 | Gm37725       | 0.0001 | No |
| 5630 | Gm5455        | 0.0001 | No |
| 5631 | Acot5         | 0.0001 | No |
| 5632 | Vmn1r158      | 0.0001 | No |
| 5633 | Gm37306       | 0.0001 | No |
| 5634 | Gm37192       | 0.0001 | No |
| 5635 | Gcg           | 0.0001 | No |
| 5636 | Gm5027        | 0.0001 | No |
| 5637 | Traj55        | 0.0001 | No |
| 5638 | Gm44194       | 0.0001 | No |
| 5639 | Hist1h2ah     | 0.0001 | No |
| 5640 | Sult1c1       | 0.0001 | No |
| 5641 | Hist1h2bl     | 0.0001 | No |
| 5642 | Gm43283       | 0.0001 | No |
| 5643 | Trav9n-4      | 0.0001 | No |
| 5644 | Gm43233       | 0.0001 | No |
| 5645 | Gm8750        | 0.0001 | No |
| 5646 | Gm26834       | 0.0001 | No |
| 5647 | Gm8109        | 0.0001 | No |
| 5648 | Gm2950        | 0.0001 | No |
| 5649 | Gm25989       | 0.0001 | No |
| 5650 | Gm16303       | 0.0001 | No |
| 5651 | Bco1          | 0.0001 | No |
| 5652 | Gm17098       | 0.0001 | No |
| 5653 | Krt19         | 0.0001 | No |
| 5654 | Gm16216       | 0.0001 | No |
| 5655 | Gm43083       | 0.0001 | No |

|      |               |        |    |
|------|---------------|--------|----|
| 5656 | 1110036E04Rik | 0.0001 | No |
| 5657 | Olf670        | 0.0001 | No |
| 5658 | Gm16863       | 0.0001 | No |
| 5659 | Gm7713        | 0.0001 | No |
| 5660 | Agxt          | 0.0001 | No |
| 5661 | RP23-2F19.3   | 0.0001 | No |
| 5662 | Gm15406       | 0.0001 | No |
| 5663 | Gm29009       | 0.0001 | No |
| 5664 | Gm31463       | 0.0001 | No |
| 5665 | Gm26682       | 0.0001 | No |
| 5666 | Gm11912       | 0.0001 | No |
| 5667 | Gm45443       | 0.0001 | No |
| 5668 | Gm37310       | 0.0001 | No |
| 5669 | Gm6441        | 0.0001 | No |
| 5670 | Gm27511       | 0.0001 | No |
| 5671 | Gm45056       | 0.0001 | No |
| 5672 | Igf2os        | 0.0001 | No |
| 5673 | Olf1389       | 0.0001 | No |
| 5674 | Vmn1r12       | 0.0001 | No |
| 5675 | Ces2a         | 0.0001 | No |
| 5676 | Mageb18       | 0.0001 | No |
| 5677 | Gm44622       | 0.0001 | No |
| 5678 | Fth-ps3       | 0.0001 | No |
| 5679 | Aipl1         | 0.0001 | No |
| 5680 | Olf802        | 0.0001 | No |
| 5681 | Gzmc          | 0.0001 | No |
| 5682 | 1700011L22Rik | 0.0001 | No |
| 5683 | Gm12343       | 0.0001 | No |
| 5684 | 4930448I18Rik | 0.0001 | No |
| 5685 | Nlrp9c        | 0.0001 | No |
| 5686 | Gm45244       | 0.0001 | No |
| 5687 | Olf436-ps1    | 0.0001 | No |
| 5688 | Olf690        | 0.0001 | No |
| 5689 | Gm24289       | 0.0001 | No |
| 5690 | Gm27639       | 0.0001 | No |
| 5691 | Gm14113       | 0.0001 | No |
| 5692 | Rbp7          | 0.0001 | No |
| 5693 | Gm45096       | 0.0001 | No |
| 5694 | A930006I01Rik | 0.0001 | No |
| 5695 | Gm6640        | 0.0001 | No |
| 5696 | Gm45369       | 0.0001 | No |
| 5697 | Marveld3      | 0.0001 | No |
| 5698 | Ppp1r2-ps4    | 0.0001 | No |
| 5699 | Gm14587       | 0.0001 | No |
| 5700 | Psors1c2      | 0.0001 | No |
| 5701 | Gm23994       | 0.0001 | No |

|      |               |        |    |
|------|---------------|--------|----|
| 5702 | Gm11755       | 0.0001 | No |
| 5703 | Trbv23        | 0.0001 | No |
| 5704 | Atp6v1b1      | 0.0001 | No |
| 5705 | Dlx4os        | 0.0001 | No |
| 5706 | Gm15189       | 0.0001 | No |
| 5707 | Gm13663       | 0.0001 | No |
| 5708 | 1700039M15Rik | 0.0001 | No |
| 5709 | 4930583I09Rik | 0.0001 | No |
| 5710 | 9130213A22Rik | 0.0001 | No |
| 5711 | Gm42665       | 0.0001 | No |
| 5712 | Smim17        | 0.0001 | No |
| 5713 | Fam150a       | 0.0001 | No |
| 5714 | Olf200-ps1    | 0.0001 | No |
| 5715 | Gm12385       | 0.0001 | No |
| 5716 | Gm5960        | 0.0001 | No |
| 5717 | Krt75         | 0.0001 | No |
| 5718 | Gm17150       | 0.0001 | No |
| 5719 | Ephx2         | 0.0001 | No |
| 5720 | Gm9923        | 0.0001 | No |
| 5721 | Olf1031       | 0.0001 | No |
| 5722 | Hspd1-ps1     | 0.0001 | No |
| 5723 | Gm9159        | 0.0001 | No |
| 5724 | 1700025N23Rik | 0.0001 | No |
| 5725 | Gm15201       | 0.0001 | No |
| 5726 | Gm13165       | 0.0001 | No |
| 5727 | Gm30214       | 0.0001 | No |
| 5728 | Far2os1       | 0.0001 | No |
| 5729 | Skint8        | 0.0001 | No |
| 5730 | 4930477O15Rik | 0.0001 | No |
| 5731 | Gm7592        | 0.0001 | No |
| 5732 | Mir6362       | 0.0001 | No |
| 5733 | Gm44228       | 0.0001 | No |
| 5734 | Gm4764        | 0.0001 | No |
| 5735 | Gm44039       | 0.0001 | No |
| 5736 | Gm44587       | 0.0001 | No |
| 5737 | Gm8991        | 0.0001 | No |
| 5738 | Gm37131       | 0.0001 | No |
| 5739 | A530032D15Rik | 0.0001 | No |
| 5740 | Gm43875       | 0.0001 | No |
| 5741 | Rpl17-ps1     | 0.0001 | No |
| 5742 | Gm24965       | 0.0001 | No |
| 5743 | Plscr5        | 0.0001 | No |
| 5744 | Gm24671       | 0.0001 | No |
| 5745 | Gm19744       | 0.0001 | No |
| 5746 | Gng2-ps1      | 0.0001 | No |
| 5747 | Gm13647       | 0.0001 | No |

|      |               |        |    |
|------|---------------|--------|----|
| 5748 | Rab7b         | 0.0001 | No |
| 5749 | Atg2a         | 0.0001 | No |
| 5750 | Gm11443       | 0.0001 | No |
| 5751 | Gm44815       | 0.0001 | No |
| 5752 | Gm11408       | 0.0001 | No |
| 5753 | Gm16329       | 0.0001 | No |
| 5754 | Gm10135       | 0.0001 | No |
| 5755 | Gm14933       | 0.0001 | No |
| 5756 | RP23-88C11.2  | 0.0001 | No |
| 5757 | Gm20670       | 0.0001 | No |
| 5758 | Trbv6         | 0.0001 | No |
| 5759 | Mir652        | 0.0001 | No |
| 5760 | Gm10797       | 0.0001 | No |
| 5761 | Gm13707       | 0.0001 | No |
| 5762 | Gm12153       | 0.0001 | No |
| 5763 | Gm12540       | 0.0001 | No |
| 5764 | Gm6884        | 0.0001 | No |
| 5765 | Gm26343       | 0.0001 | No |
| 5766 | Gm9409        | 0.0001 | No |
| 5767 | Gm15407       | 0.0001 | No |
| 5768 | Gm14896       | 0.0001 | No |
| 5769 | Gm20949       | 0.0001 | No |
| 5770 | Gm27818       | 0.0001 | No |
| 5771 | Gm14970       | 0.0001 | No |
| 5772 | Gm12291       | 0.0001 | No |
| 5773 | Olfir574      | 0.0001 | No |
| 5774 | Gm17075       | 0.0001 | No |
| 5775 | Hist1h2ad     | 0.0001 | No |
| 5776 | H2-M9         | 0.0001 | No |
| 5777 | Sgk2          | 0.0001 | No |
| 5778 | AU021092      | 0.0001 | No |
| 5779 | Gm25422       | 0.0001 | No |
| 5780 | Gm43684       | 0.0001 | No |
| 5781 | Htr6          | 0.0001 | No |
| 5782 | Gm5444        | 0.0001 | No |
| 5783 | Gm12187       | 0.0001 | No |
| 5784 | Zfp781        | 0.0001 | No |
| 5785 | Gm6455        | 0.0001 | No |
| 5786 | Gm9146        | 0.0001 | No |
| 5787 | Tmem102       | 0.0001 | No |
| 5788 | Gm16499       | 0.0001 | No |
| 5789 | Platr7        | 0.0001 | No |
| 5790 | Olfir138      | 0.0001 | No |
| 5791 | 4930405H06Rik | 0.0001 | No |
| 5792 | Gm22723       | 0.0001 | No |
| 5793 | Nobox         | 0.0001 | No |

|      |               |        |    |
|------|---------------|--------|----|
| 5794 | Rpl26-ps2     | 0.0001 | No |
| 5795 | Gm19253       | 0.0001 | No |
| 5796 | Mmp3          | 0.0001 | No |
| 5797 | Trav3-3       | 0.0001 | No |
| 5798 | Gm5615        | 0.0001 | No |
| 5799 | Gm38509       | 0.0001 | No |
| 5800 | Gm25776       | 0.0001 | No |
| 5801 | Lurap11       | 0.0001 | No |
| 5802 | Gm22197       | 0.0001 | No |
| 5803 | Gm42678       | 0.0001 | No |
| 5804 | Gm12646       | 0.0001 | No |
| 5805 | Gm8748        | 0.0001 | No |
| 5806 | Rbp3          | 0.0001 | No |
| 5807 | Gm20679       | 0.0001 | No |
| 5808 | Gm19057       | 0.0001 | No |
| 5809 | Gzmk          | 0.0001 | No |
| 5810 | Olfr1245      | 0.0001 | No |
| 5811 | 4930584F24Rik | 0.0001 | No |
| 5812 | 5730403I07Rik | 0.0001 | No |
| 5813 | Illa          | 0.0001 | No |
| 5814 | Gm9317        | 0.0001 | No |
| 5815 | Mb21d2        | 0.0001 | No |
| 5816 | Gm20100       | 0.0001 | No |
| 5817 | Ighv8-11      | 0.0001 | No |
| 5818 | Gm15544       | 0.0001 | No |
| 5819 | Plin5         | 0.0001 | No |
| 5820 | C030010L15Rik | 0.0001 | No |
| 5821 | Dnase2b       | 0.0001 | No |
| 5822 | Lum           | 0.0001 | No |
| 5823 | Trav7d-4      | 0.0001 | No |
| 5824 | Olfr1015      | 0.0001 | No |
| 5825 | Gm29610       | 0.0001 | No |
| 5826 | Sncb          | 0.0001 | No |
| 5827 | Gm14002       | 0.0001 | No |
| 5828 | Olfr1275      | 0.0001 | No |
| 5829 | Spaca5        | 0.0001 | No |
| 5830 | Gm5350        | 0.0001 | No |
| 5831 | Mir6974       | 0.0001 | No |
| 5832 | Gm43485       | 0.0001 | No |
| 5833 | 5530401A14Rik | 0.0001 | No |
| 5834 | Olfr766-ps1   | 0.0001 | No |
| 5835 | Gm15791       | 0.0001 | No |
| 5836 | C130012C08Rik | 0.0001 | No |
| 5837 | Nrsn1         | 0.0001 | No |
| 5838 | Serpinb13     | 0.0001 | No |
| 5839 | Gm37489       | 0.0001 | No |

|      |               |        |    |
|------|---------------|--------|----|
| 5840 | Il27          | 0.0001 | No |
| 5841 | Rpl15-ps4     | 0.0001 | No |
| 5842 | Gm42833       | 0.0001 | No |
| 5843 | Gm17349       | 0.0001 | No |
| 5844 | Gm21893       | 0.0001 | No |
| 5845 | Gm42949       | 0.0001 | No |
| 5846 | Gm19093       | 0.0001 | No |
| 5847 | Gm43368       | 0.0001 | No |
| 5848 | Tpm2          | 0.0001 | No |
| 5849 | Gm9898        | 0.0001 | No |
| 5850 | Gm45684       | 0.0001 | No |
| 5851 | Ighv1-70      | 0.0001 | No |
| 5852 | D630029K05Rik | 0.0001 | No |
| 5853 | Gm11498       | 0.0001 | No |
| 5854 | RP24-254A5.4  | 0.0001 | No |
| 5855 | Gm14439       | 0.0001 | No |
| 5856 | Gm17979       | 0.0001 | No |
| 5857 | Pcdhga4       | 0.0001 | No |
| 5858 | Rny1          | 0.0001 | No |
| 5859 | Ighv1-47      | 0.0001 | No |
| 5860 | Gm22459       | 0.0001 | No |
| 5861 | Ass-ps1       | 0.0001 | No |
| 5862 | Frzb          | 0.0001 | No |
| 5863 | Aanat         | 0.0001 | No |
| 5864 | Rps19-ps9     | 0.0001 | No |
| 5865 | Gm7451        | 0.0001 | No |
| 5866 | Arhgef16      | 0.0001 | No |
| 5867 | Irgc1         | 0.0001 | No |
| 5868 | Olfir860      | 0.0001 | No |
| 5869 | Pih1d3        | 0.0001 | No |
| 5870 | Gm38041       | 0.0001 | No |
| 5871 | Gm28360       | 0.0001 | No |
| 5872 | Lman1l        | 0.0001 | No |
| 5873 | Mir6354       | 0.0001 | No |
| 5874 | RP23-116C19.1 | 0.0001 | No |
| 5875 | Gm12448       | 0.0001 | No |
| 5876 | Gm13889       | 0.0001 | No |
| 5877 | Vmn1r234      | 0.0001 | No |
| 5878 | Gm24281       | 0.0001 | No |
| 5879 | D930036K23Rik | 0.0001 | No |
| 5880 | Gm45054       | 0.0001 | No |
| 5881 | Gm43517       | 0.0001 | No |
| 5882 | Gm12226       | 0.0001 | No |
| 5883 | Ltbr          | 0.0001 | No |
| 5884 | A730046J19Rik | 0.0001 | No |
| 5885 | Gm28777       | 0.0001 | No |



|      |               |        |    |
|------|---------------|--------|----|
| 5886 | Gm7498        | 0.0001 | No |
| 5887 | Sall1         | 0.0001 | No |
| 5888 | 9430037G07Rik | 0.0001 | No |
| 5889 | Ang2          | 0.0001 | No |
| 5890 | Cited1        | 0.0001 | No |
| 5891 | RP23-192H2.5  | 0.0001 | No |
| 5892 | 4930405N21Rik | 0.0001 | No |
| 5893 | Gm13181       | 0.0001 | No |
| 5894 | Hoxc8         | 0.0001 | No |
| 5895 | Kitl          | 0.0001 | No |
| 5896 | Olfr1264      | 0.0001 | No |
| 5897 | Inhbe         | 0.0001 | No |
| 5898 | RP23-261O3.5  | 0.0001 | No |
| 5899 | Gm26358       | 0.0001 | No |
| 5900 | Gm15997       | 0.0001 | No |
| 5901 | Gm25788       | 0.0001 | No |
| 5902 | Gm10271       | 0.0001 | No |
| 5903 | Gm8580        | 0.0001 | No |
| 5904 | Tigd3         | 0.0001 | No |
| 5905 | Epha8         | 0.0001 | No |
| 5906 | Gm37332       | 0.0001 | No |
| 5907 | Chrm4         | 0.0001 | No |
| 5908 | Gm45277       | 0.0001 | No |
| 5909 | Grrp1         | 0.0001 | No |
| 5910 | Gkn1          | 0.0001 | No |
| 5911 | Gm17508       | 0.0001 | No |
| 5912 | Olfr1260      | 0.0001 | No |
| 5913 | Olfr462       | 0.0001 | No |
| 5914 | Gm17973       | 0.0001 | No |
| 5915 | Mir8090       | 0.0001 | No |
| 5916 | Id4           | 0.0001 | No |
| 5917 | Gm7381        | 0.0001 | No |
| 5918 | Creg2         | 0.0001 | No |
| 5919 | Akr1c18       | 0.0001 | No |
| 5920 | Gm8168        | 0.0001 | No |
| 5921 | Gm15161       | 0.0001 | No |
| 5922 | Gm29480       | 0.0001 | No |
| 5923 | Gm9274        | 0.0001 | No |
| 5924 | Gm13687       | 0.0001 | No |
| 5925 | Gnat3         | 0.0001 | No |
| 5926 | Gm22362       | 0.0001 | No |
| 5927 | Gm9429        | 0.0001 | No |
| 5928 | Gm8209        | 0.0001 | No |
| 5929 | 4930578M01Rik | 0.0001 | No |
| 5930 | 4930563D23Rik | 0.0001 | No |
| 5931 | Actl10        | 0.0001 | No |

|      |               |        |    |
|------|---------------|--------|----|
| 5932 | 2600006K01Rik | 0.0001 | No |
| 5933 | Gm17056       | 0.0001 | No |
| 5934 | Tmem100       | 0.0001 | No |
| 5935 | Gm13841       | 0.0001 | No |
| 5936 | Gm19963       | 0.0001 | No |
| 5937 | Gm28019       | 0.0001 | No |
| 5938 | Gm12222       | 0.0001 | No |
| 5939 | Fabp3         | 0.0001 | No |
| 5940 | Olf748        | 0.0001 | No |
| 5941 | Gm13104       | 0.0001 | No |
| 5942 | Ly6f          | 0.0001 | No |
| 5943 | Cks1brt       | 0.0001 | No |
| 5944 | Gm44706       | 0.0001 | No |
| 5945 | Pcdhb11       | 0.0001 | No |
| 5946 | Gm45590       | 0.0001 | No |
| 5947 | Gm22355       | 0.0001 | No |
| 5948 | Mir484        | 0.0001 | No |
| 5949 | Gm12123       | 0.0001 | No |
| 5950 | Gm6415        | 0.0001 | No |
| 5951 | Gm44386       | 0.0001 | No |
| 5952 | Gm18611       | 0.0001 | No |
| 5953 | Gm7442        | 0.0001 | No |
| 5954 | Gm14469       | 0.0001 | No |
| 5955 | Gm11485       | 0.0001 | No |
| 5956 | Prl7b1        | 0.0001 | No |
| 5957 | Gm17160       | 0.0001 | No |
| 5958 | 1700045H11Rik | 0.0001 | No |
| 5959 | Gm38245       | 0.0001 | No |
| 5960 | Gm43840       | 0.0001 | No |
| 5961 | Gm37945       | 0.0001 | No |
| 5962 | Alms1-ps2     | 0.0001 | No |
| 5963 | Ftl1-ps2      | 0.0001 | No |
| 5964 | Gm16031       | 0.0001 | No |
| 5965 | Olf1073-ps1   | 0.0001 | No |
| 5966 | Gm9167        | 0.0001 | No |
| 5967 | Hist1h4f      | 0.0001 | No |
| 5968 | Gm16113       | 0.0001 | No |
| 5969 | E130218I03Rik | 0.0001 | No |
| 5970 | Rag2          | 0.0001 | No |
| 5971 | Gm28865       | 0.0001 | No |
| 5972 | A530084C06Rik | 0.0001 | No |
| 5973 | 5330413P13Rik | 0.0001 | No |
| 5974 | Gm44110       | 0.0001 | No |
| 5975 | Gm14616       | 0.0001 | No |
| 5976 | Gm29417       | 0.0001 | No |
| 5977 | Gm37066       | 0.0001 | No |

|      |                |        |    |
|------|----------------|--------|----|
| 5978 | Gm44607        | 0.0001 | No |
| 5979 | Samd12         | 0.0001 | No |
| 5980 | Serpina6       | 0.0001 | No |
| 5981 | Gm26739        | 0.0001 | No |
| 5982 | Gm3468         | 0.0001 | No |
| 5983 | Nap113         | 0.0001 | No |
| 5984 | Baiap2l2       | 0.0001 | No |
| 5985 | A830009L08Rik  | 0.0001 | No |
| 5986 | Gm16570        | 0.0001 | No |
| 5987 | Mrgprx3-ps     | 0.0001 | No |
| 5988 | Snhg9          | 0.0001 | No |
| 5989 | Ttc36          | 0.0001 | No |
| 5990 | Gm45416        | 0.0001 | No |
| 5991 | 4732491K20Rik  | 0.0001 | No |
| 5992 | Tek            | 0.0001 | No |
| 5993 | Gm16578        | 0.0001 | No |
| 5994 | Gm17850        | 0.0001 | No |
| 5995 | Ffar3          | 0.0001 | No |
| 5996 | Shisa2         | 0.0001 | No |
| 5997 | Platr14        | 0.0001 | No |
| 5998 | Gm37121        | 0.0001 | No |
| 5999 | 1190005I06Rik  | 0.0001 | No |
| 6000 | Gm38505        | 0.0001 | No |
| 6001 | Gm24448        | 0.0001 | No |
| 6002 | RP23-392I13.14 | 0.0001 | No |
| 6003 | I830127L07Rik  | 0.0001 | No |
| 6004 | 2810471M01Rik  | 0.0001 | No |
| 6005 | Gm11874        | 0.0001 | No |
| 6006 | Gm7443         | 0.0001 | No |
| 6007 | Cacng4         | 0.0001 | No |
| 6008 | Gm44920        | 0.0001 | No |
| 6009 | RP24-397P9.3   | 0.0001 | No |
| 6010 | 00R_AC107638.2 | 0.0000 | No |
| 6011 | 00R_Pgap2      | 0.0000 | No |
| 6012 | 0610005C13Rik  | 0.0000 | No |
| 6013 | 0610006L08Rik  | 0.0000 | No |
| 6014 | 0610007P14Rik  | 0.0000 | No |
| 6015 | 0610009B22Rik  | 0.0000 | No |
| 6016 | 0610009E02Rik  | 0.0000 | No |
| 6017 | 0610009L18Rik  | 0.0000 | No |
| 6018 | 0610009O20Rik  | 0.0000 | No |
| 6019 | 0610010F05Rik  | 0.0000 | No |
| 6020 | 0610010K14Rik  | 0.0000 | No |
| 6021 | 0610012D04Rik  | 0.0000 | No |
| 6022 | 0610012G03Rik  | 0.0000 | No |
| 6023 | 0610025J13Rik  | 0.0000 | No |

|      |               |        |    |
|------|---------------|--------|----|
| 6024 | 0610031O16Rik | 0.0000 | No |
| 6025 | 0610033M10Rik | 0.0000 | No |
| 6026 | 0610037L13Rik | 0.0000 | No |
| 6027 | 0610038B21Rik | 0.0000 | No |
| 6028 | 0610039K10Rik | 0.0000 | No |
| 6029 | 0610040B10Rik | 0.0000 | No |
| 6030 | 0610040F04Rik | 0.0000 | No |
| 6031 | 0610040J01Rik | 0.0000 | No |
| 6032 | 0610043K17Rik | 0.0000 | No |
| 6033 | 1010001B22Rik | 0.0000 | No |
| 6034 | 1010001N08Rik | 0.0000 | No |
| 6035 | 1110002E22Rik | 0.0000 | No |
| 6036 | 1110002J07Rik | 0.0000 | No |
| 6037 | 1110002L01Rik | 0.0000 | No |
| 6038 | 1110002O04Rik | 0.0000 | No |
| 6039 | 1110003F10Rik | 0.0000 | No |
| 6040 | 1110004E09Rik | 0.0000 | No |
| 6041 | 1110004F10Rik | 0.0000 | No |
| 6042 | 1110006O24Rik | 0.0000 | No |
| 6043 | 1110008E08Rik | 0.0000 | No |
| 6044 | 1110008F13Rik | 0.0000 | No |
| 6045 | 1110008L16Rik | 0.0000 | No |
| 6046 | 1110008P14Rik | 0.0000 | No |
| 6047 | 1110012L19Rik | 0.0000 | No |
| 6048 | 1110015O18Rik | 0.0000 | No |
| 6049 | 1110018N20Rik | 0.0000 | No |
| 6050 | 1110019D14Rik | 0.0000 | No |
| 6051 | 1110020A21Rik | 0.0000 | No |
| 6052 | 1110025L11Rik | 0.0000 | No |
| 6053 | 1110025M09Rik | 0.0000 | No |
| 6054 | 1110032A03Rik | 0.0000 | No |
| 6055 | 1110034G24Rik | 0.0000 | No |
| 6056 | 1110035H17Rik | 0.0000 | No |
| 6057 | 1110037F02Rik | 0.0000 | No |
| 6058 | 1110038B12Rik | 0.0000 | No |
| 6059 | 1110038F14Rik | 0.0000 | No |
| 6060 | 1110046J04Rik | 0.0000 | No |
| 6061 | 1110051M20Rik | 0.0000 | No |
| 6062 | 1110057P08Rik | 0.0000 | No |
| 6063 | 1110059G10Rik | 0.0000 | No |
| 6064 | 1110060G06Rik | 0.0000 | No |
| 6065 | 1110065P20Rik | 0.0000 | No |
| 6066 | 1190007I07Rik | 0.0000 | No |
| 6067 | 1190028D05Rik | 0.0000 | No |
| 6068 | 1200007C13Rik | 0.0000 | No |
| 6069 | 1300002E11Rik | 0.0000 | No |

|      |               |        |    |
|------|---------------|--------|----|
| 6070 | 1300017J02Rik | 0.0000 | No |
| 6071 | 1500002C15Rik | 0.0000 | No |
| 6072 | 1500002F19Rik | 0.0000 | No |
| 6073 | 1500004A13Rik | 0.0000 | No |
| 6074 | 1500009L16Rik | 0.0000 | No |
| 6075 | 1500011B03Rik | 0.0000 | No |
| 6076 | 1500011K16Rik | 0.0000 | No |
| 6077 | 1500012K07Rik | 0.0000 | No |
| 6078 | 1500015A07Rik | 0.0000 | No |
| 6079 | 1500015L24Rik | 0.0000 | No |
| 6080 | 1500015O10Rik | 0.0000 | No |
| 6081 | 1500017E21Rik | 0.0000 | No |
| 6082 | 1500026H17Rik | 0.0000 | No |
| 6083 | 1500035N22Rik | 0.0000 | No |
| 6084 | 1520401A03Rik | 0.0000 | No |
| 6085 | 1600002D24Rik | 0.0000 | No |
| 6086 | 1600002H07Rik | 0.0000 | No |
| 6087 | 1600002K03Rik | 0.0000 | No |
| 6088 | 1600010M07Rik | 0.0000 | No |
| 6089 | 1600012H06Rik | 0.0000 | No |
| 6090 | 1600012P17Rik | 0.0000 | No |
| 6091 | 1600014C10Rik | 0.0000 | No |
| 6092 | 1600014C23Rik | 0.0000 | No |
| 6093 | 1600015I10Rik | 0.0000 | No |
| 6094 | 1600017P15Rik | 0.0000 | No |
| 6095 | 1600020E01Rik | 0.0000 | No |
| 6096 | 1600023N17Rik | 0.0000 | No |
| 6097 | 1600025M17Rik | 0.0000 | No |
| 6098 | 1600027J07Rik | 0.0000 | No |
| 6099 | 1600029O15Rik | 0.0000 | No |
| 6100 | 1700001C02Rik | 0.0000 | No |
| 6101 | 1700001C19Rik | 0.0000 | No |
| 6102 | 1700001D01Rik | 0.0000 | No |
| 6103 | 1700001F09Rik | 0.0000 | No |
| 6104 | 1700001G01Rik | 0.0000 | No |
| 6105 | 1700001G11Rik | 0.0000 | No |
| 6106 | 1700001G17Rik | 0.0000 | No |
| 6107 | 1700001J03Rik | 0.0000 | No |
| 6108 | 1700001J04Rik | 0.0000 | No |
| 6109 | 1700001J11Rik | 0.0000 | No |
| 6110 | 1700001L05Rik | 0.0000 | No |
| 6111 | 1700001N15Rik | 0.0000 | No |
| 6112 | 1700001O22Rik | 0.0000 | No |
| 6113 | 1700001P01Rik | 0.0000 | No |
| 6114 | 1700003C15Rik | 0.0000 | No |
| 6115 | 1700003D09Rik | 0.0000 | No |

|      |               |        |    |
|------|---------------|--------|----|
| 6116 | 1700003E16Rik | 0.0000 | No |
| 6117 | 1700003E24Rik | 0.0000 | No |
| 6118 | 1700003F12Rik | 0.0000 | No |
| 6119 | 1700003G13Rik | 0.0000 | No |
| 6120 | 1700003G18Rik | 0.0000 | No |
| 6121 | 1700003H04Rik | 0.0000 | No |
| 6122 | 1700003I16Rik | 0.0000 | No |
| 6123 | 1700003I22Rik | 0.0000 | No |
| 6124 | 1700003L19Rik | 0.0000 | No |
| 6125 | 1700003M07Rik | 0.0000 | No |
| 6126 | 1700003N22Rik | 0.0000 | No |
| 6127 | 1700006A11Rik | 0.0000 | No |
| 6128 | 1700006E09Rik | 0.0000 | No |
| 6129 | 1700006F04Rik | 0.0000 | No |
| 6130 | 1700006P03Rik | 0.0000 | No |
| 6131 | 1700007B14Rik | 0.0000 | No |
| 6132 | 1700007E05Rik | 0.0000 | No |
| 6133 | 1700007G11Rik | 0.0000 | No |
| 6134 | 1700007J10Rik | 0.0000 | No |
| 6135 | 1700007K09Rik | 0.0000 | No |
| 6136 | 1700007M16Rik | 0.0000 | No |
| 6137 | 1700008A23Rik | 0.0000 | No |
| 6138 | 1700008B11Rik | 0.0000 | No |
| 6139 | 1700008J07Rik | 0.0000 | No |
| 6140 | 1700008K24Rik | 0.0000 | No |
| 6141 | 1700008N11Rik | 0.0000 | No |
| 6142 | 1700008O03Rik | 0.0000 | No |
| 6143 | 1700008P02Rik | 0.0000 | No |
| 6144 | 1700009C05Rik | 0.0000 | No |
| 6145 | 1700009J07Rik | 0.0000 | No |
| 6146 | 1700009N14Rik | 0.0000 | No |
| 6147 | 1700010D01Rik | 0.0000 | No |
| 6148 | 1700010H22Rik | 0.0000 | No |
| 6149 | 1700010I02Rik | 0.0000 | No |
| 6150 | 1700010I14Rik | 0.0000 | No |
| 6151 | 1700010J16Rik | 0.0000 | No |
| 6152 | 1700010K23Rik | 0.0000 | No |
| 6153 | 1700010K24Rik | 0.0000 | No |
| 6154 | 1700010L04Rik | 0.0000 | No |
| 6155 | 1700010N08Rik | 0.0000 | No |
| 6156 | 1700011B04Rik | 0.0000 | No |
| 6157 | 1700011C11Rik | 0.0000 | No |
| 6158 | 1700011H14Rik | 0.0000 | No |
| 6159 | 1700011I03Rik | 0.0000 | No |
| 6160 | 1700011M02Rik | 0.0000 | No |
| 6161 | 1700012B07Rik | 0.0000 | No |

|      |               |        |    |
|------|---------------|--------|----|
| 6162 | 1700012C08Rik | 0.0000 | No |
| 6163 | 1700012C14Rik | 0.0000 | No |
| 6164 | 1700012D14Rik | 0.0000 | No |
| 6165 | 1700012D16Rik | 0.0000 | No |
| 6166 | 1700012E03Rik | 0.0000 | No |
| 6167 | 1700012I11Rik | 0.0000 | No |
| 6168 | 1700012J22Rik | 0.0000 | No |
| 6169 | 1700012P22Rik | 0.0000 | No |
| 6170 | 1700013A02Rik | 0.0000 | No |
| 6171 | 1700013D24Rik | 0.0000 | No |
| 6172 | 1700013F07Rik | 0.0000 | No |
| 6173 | 1700013G24Rik | 0.0000 | No |
| 6174 | 1700013H16Rik | 0.0000 | No |
| 6175 | 1700013M08Rik | 0.0000 | No |
| 6176 | 1700014D04Rik | 0.0000 | No |
| 6177 | 1700014F14Rik | 0.0000 | No |
| 6178 | 1700014L14Rik | 0.0000 | No |
| 6179 | 1700015C17Rik | 0.0000 | No |
| 6180 | 1700015O11Rik | 0.0000 | No |
| 6181 | 1700016A09Rik | 0.0000 | No |
| 6182 | 1700016B15Rik | 0.0000 | No |
| 6183 | 1700016C15Rik | 0.0000 | No |
| 6184 | 1700016D06Rik | 0.0000 | No |
| 6185 | 1700016D08Rik | 0.0000 | No |
| 6186 | 1700016F12Rik | 0.0000 | No |
| 6187 | 1700016G14Rik | 0.0000 | No |
| 6188 | 1700016G22Rik | 0.0000 | No |
| 6189 | 1700016K19Rik | 0.0000 | No |
| 6190 | 1700016L21Rik | 0.0000 | No |
| 6191 | 1700016P03Rik | 0.0000 | No |
| 6192 | 1700016P04Rik | 0.0000 | No |
| 6193 | 1700017B05Rik | 0.0000 | No |
| 6194 | 1700017D01Rik | 0.0000 | No |
| 6195 | 1700017G19Rik | 0.0000 | No |
| 6196 | 1700017I07Rik | 0.0000 | No |
| 6197 | 1700017J07Rik | 0.0000 | No |
| 6198 | 1700017N19Rik | 0.0000 | No |
| 6199 | 1700018A04Rik | 0.0000 | No |
| 6200 | 1700018B08Rik | 0.0000 | No |
| 6201 | 1700018C11Rik | 0.0000 | No |
| 6202 | 1700018F24Rik | 0.0000 | No |
| 6203 | 1700018L02Rik | 0.0000 | No |
| 6204 | 1700018M17Rik | 0.0000 | No |
| 6205 | 1700019A02Rik | 0.0000 | No |
| 6206 | 1700019A23Rik | 0.0000 | No |
| 6207 | 1700019B03Rik | 0.0000 | No |

|      |               |        |    |
|------|---------------|--------|----|
| 6208 | 1700019D03Rik | 0.0000 | No |
| 6209 | 1700019G24Rik | 0.0000 | No |
| 6210 | 1700019N19Rik | 0.0000 | No |
| 6211 | 1700019O17Rik | 0.0000 | No |
| 6212 | 1700020A23Rik | 0.0000 | No |
| 6213 | 1700020D05Rik | 0.0000 | No |
| 6214 | 1700020G17Rik | 0.0000 | No |
| 6215 | 1700020L24Rik | 0.0000 | No |
| 6216 | 1700020M21Rik | 0.0000 | No |
| 6217 | 1700020N01Rik | 0.0000 | No |
| 6218 | 1700020N15Rik | 0.0000 | No |
| 6219 | 1700020N18Rik | 0.0000 | No |
| 6220 | 1700021A07Rik | 0.0000 | No |
| 6221 | 1700021F05Rik | 0.0000 | No |
| 6222 | 1700021F07Rik | 0.0000 | No |
| 6223 | 1700021F13Rik | 0.0000 | No |
| 6224 | 1700021J08Rik | 0.0000 | No |
| 6225 | 1700021N21Rik | 0.0000 | No |
| 6226 | 1700021P04Rik | 0.0000 | No |
| 6227 | 1700022A21Rik | 0.0000 | No |
| 6228 | 1700022A22Rik | 0.0000 | No |
| 6229 | 1700022E09Rik | 0.0000 | No |
| 6230 | 1700022F17Rik | 0.0000 | No |
| 6231 | 1700022H16Rik | 0.0000 | No |
| 6232 | 1700022I11Rik | 0.0000 | No |
| 6233 | 1700022N22Rik | 0.0000 | No |
| 6234 | 1700023F02Rik | 0.0000 | No |
| 6235 | 1700023F06Rik | 0.0000 | No |
| 6236 | 1700023G09Rik | 0.0000 | No |
| 6237 | 1700023H06Rik | 0.0000 | No |
| 6238 | 1700024B05Rik | 0.0000 | No |
| 6239 | 1700024B18Rik | 0.0000 | No |
| 6240 | 1700024J04Rik | 0.0000 | No |
| 6241 | 1700024P04Rik | 0.0000 | No |
| 6242 | 1700024P16Rik | 0.0000 | No |
| 6243 | 1700025B11Rik | 0.0000 | No |
| 6244 | 1700025C18Rik | 0.0000 | No |
| 6245 | 1700025D23Rik | 0.0000 | No |
| 6246 | 1700025F24Rik | 0.0000 | No |
| 6247 | 1700025G04Rik | 0.0000 | No |
| 6248 | 1700025J12Rik | 0.0000 | No |
| 6249 | 1700025K24Rik | 0.0000 | No |
| 6250 | 1700025M24Rik | 0.0000 | No |
| 6251 | 1700025N21Rik | 0.0000 | No |
| 6252 | 1700025O08Rik | 0.0000 | No |
| 6253 | 1700026D11Rik | 0.0000 | No |



|      |               |        |    |
|------|---------------|--------|----|
| 6254 | 1700026F02Rik | 0.0000 | No |
| 6255 | 1700026J12Rik | 0.0000 | No |
| 6256 | 1700027A07Rik | 0.0000 | No |
| 6257 | 1700027A15Rik | 0.0000 | No |
| 6258 | 1700027F06Rik | 0.0000 | No |
| 6259 | 1700027F09Rik | 0.0000 | No |
| 6260 | 1700027H10Rik | 0.0000 | No |
| 6261 | 1700027I24Rik | 0.0000 | No |
| 6262 | 1700027J07Rik | 0.0000 | No |
| 6263 | 1700028B04Rik | 0.0000 | No |
| 6264 | 1700028D13Rik | 0.0000 | No |
| 6265 | 1700028E10Rik | 0.0000 | No |
| 6266 | 1700028I16Rik | 0.0000 | No |
| 6267 | 1700028J19Rik | 0.0000 | No |
| 6268 | 1700028K03Rik | 0.0000 | No |
| 6269 | 1700028N14Rik | 0.0000 | No |
| 6270 | 1700028P14Rik | 0.0000 | No |
| 6271 | 1700028P15Rik | 0.0000 | No |
| 6272 | 1700029B24Rik | 0.0000 | No |
| 6273 | 1700029F12Rik | 0.0000 | No |
| 6274 | 1700029H14Rik | 0.0000 | No |
| 6275 | 1700029I15Rik | 0.0000 | No |
| 6276 | 1700029J07Rik | 0.0000 | No |
| 6277 | 1700029M20Rik | 0.0000 | No |
| 6278 | 1700029P11Rik | 0.0000 | No |
| 6279 | 1700030A11Rik | 0.0000 | No |
| 6280 | 1700030C10Rik | 0.0000 | No |
| 6281 | 1700030C12Rik | 0.0000 | No |
| 6282 | 1700030C14Rik | 0.0000 | No |
| 6283 | 1700030F04Rik | 0.0000 | No |
| 6284 | 1700030I03Rik | 0.0000 | No |
| 6285 | 1700030J22Rik | 0.0000 | No |
| 6286 | 1700030K09Rik | 0.0000 | No |
| 6287 | 1700030L20Rik | 0.0000 | No |
| 6288 | 1700030M09Rik | 0.0000 | No |
| 6289 | 1700030N03Rik | 0.0000 | No |
| 6290 | 1700030N18Rik | 0.0000 | No |
| 6291 | 1700030O20Rik | 0.0000 | No |
| 6292 | 1700031A10Rik | 0.0000 | No |
| 6293 | 1700031F05Rik | 0.0000 | No |
| 6294 | 1700031F10Rik | 0.0000 | No |
| 6295 | 1700031L13Rik | 0.0000 | No |
| 6296 | 1700031M16Rik | 0.0000 | No |
| 6297 | 1700034B16Rik | 0.0000 | No |
| 6298 | 1700034E13Rik | 0.0000 | No |
| 6299 | 1700034G24Rik | 0.0000 | No |

|      |                |        |    |
|------|----------------|--------|----|
| 6300 | 1700034H15Rik  | 0.0000 | No |
| 6301 | 1700034I23Rik  | 0.0000 | No |
| 6302 | 1700034J04Rik  | 0.0000 | No |
| 6303 | 1700034J05Rik  | 0.0000 | No |
| 6304 | 1700034K08Rik  | 0.0000 | No |
| 6305 | 1700034P13Rik  | 0.0000 | No |
| 6306 | 1700036G14Rik  | 0.0000 | No |
| 6307 | 1700036O09Rik  | 0.0000 | No |
| 6308 | 1700037C06Rik  | 0.0000 | No |
| 6309 | 1700037C18Rik  | 0.0000 | No |
| 6310 | 1700037F24Rik  | 0.0000 | No |
| 6311 | 1700037H04Rik  | 0.0000 | No |
| 6312 | 1700039E22Rik  | 0.0000 | No |
| 6313 | 1700039I01Rik  | 0.0000 | No |
| 6314 | 1700039M10Rik  | 0.0000 | No |
| 6315 | 1700040D17Rik  | 0.0000 | No |
| 6316 | 1700040F15Rik  | 0.0000 | No |
| 6317 | 1700040F17Rik  | 0.0000 | No |
| 6318 | 1700040K01Rik  | 0.0000 | No |
| 6319 | 1700040L02Rik  | 0.0000 | No |
| 6320 | 1700040L08Rik  | 0.0000 | No |
| 6321 | 1700041G16Rik  | 0.0000 | No |
| 6322 | 1700041M05Rik  | 0.0000 | No |
| 6323 | 1700041M19Rik  | 0.0000 | No |
| 6324 | 1700042D02Rik  | 0.0000 | No |
| 6325 | 1700042G07Rik  | 0.0000 | No |
| 6326 | 1700042G15Rik  | 0.0000 | No |
| 6327 | 1700042O10Rik  | 0.0000 | No |
| 6328 | 1700044C05Rik  | 0.0000 | No |
| 6329 | 1700044K03Rik  | 0.0000 | No |
| 6330 | 1700045I11Rik  | 0.0000 | No |
| 6331 | 1700047A11Rik  | 0.0000 | No |
| 6332 | 1700047F07Rik  | 0.0000 | No |
| 6333 | 1700047I17Rik2 | 0.0000 | No |
| 6334 | 1700047L14Rik  | 0.0000 | No |
| 6335 | 1700047M11Rik  | 0.0000 | No |
| 6336 | 1700047N06Rik  | 0.0000 | No |
| 6337 | 1700047O18Rik  | 0.0000 | No |
| 6338 | 1700048F04Rik  | 0.0000 | No |
| 6339 | 1700048M11Rik  | 0.0000 | No |
| 6340 | 1700048O20Rik  | 0.0000 | No |
| 6341 | 1700049E15Rik  | 0.0000 | No |
| 6342 | 1700049E17Rik1 | 0.0000 | No |
| 6343 | 1700049E17Rik2 | 0.0000 | No |
| 6344 | 1700049E22Rik  | 0.0000 | No |
| 6345 | 1700049J03Rik  | 0.0000 | No |

|      |               |        |    |
|------|---------------|--------|----|
| 6346 | 1700049L16Rik | 0.0000 | No |
| 6347 | 1700051A21Rik | 0.0000 | No |
| 6348 | 1700051K13Rik | 0.0000 | No |
| 6349 | 1700051O22Rik | 0.0000 | No |
| 6350 | 1700052I22Rik | 0.0000 | No |
| 6351 | 1700052K11Rik | 0.0000 | No |
| 6352 | 1700054A03Rik | 0.0000 | No |
| 6353 | 1700054K02Rik | 0.0000 | No |
| 6354 | 1700054K19Rik | 0.0000 | No |
| 6355 | 1700054M17Rik | 0.0000 | No |
| 6356 | 1700054O19Rik | 0.0000 | No |
| 6357 | 1700055D18Rik | 0.0000 | No |
| 6358 | 1700056E22Rik | 0.0000 | No |
| 6359 | 1700056N10Rik | 0.0000 | No |
| 6360 | 1700057G04Rik | 0.0000 | No |
| 6361 | 1700057H21Rik | 0.0000 | No |
| 6362 | 1700058P15Rik | 0.0000 | No |
| 6363 | 1700060C16Rik | 0.0000 | No |
| 6364 | 1700060C20Rik | 0.0000 | No |
| 6365 | 1700060J05Rik | 0.0000 | No |
| 6366 | 1700060O08Rik | 0.0000 | No |
| 6367 | 1700061E17Rik | 0.0000 | No |
| 6368 | 1700061E18Rik | 0.0000 | No |
| 6369 | 1700061F12Rik | 0.0000 | No |
| 6370 | 1700061G19Rik | 0.0000 | No |
| 6371 | 1700061H18Rik | 0.0000 | No |
| 6372 | 1700061I17Rik | 0.0000 | No |
| 6373 | 1700061J23Rik | 0.0000 | No |
| 6374 | 1700063D05Rik | 0.0000 | No |
| 6375 | 1700063H04Rik | 0.0000 | No |
| 6376 | 1700063H06Rik | 0.0000 | No |
| 6377 | 1700063I16Rik | 0.0000 | No |
| 6378 | 1700063K16Rik | 0.0000 | No |
| 6379 | 1700064H15Rik | 0.0000 | No |
| 6380 | 1700065D16Rik | 0.0000 | No |
| 6381 | 1700065L07Rik | 0.0000 | No |
| 6382 | 1700066B17Rik | 0.0000 | No |
| 6383 | 1700066B19Rik | 0.0000 | No |
| 6384 | 1700066C05Rik | 0.0000 | No |
| 6385 | 1700066M21Rik | 0.0000 | No |
| 6386 | 1700066N21Rik | 0.0000 | No |
| 6387 | 1700066O22Rik | 0.0000 | No |
| 6388 | 1700067G17Rik | 0.0000 | No |
| 6389 | 1700067P10Rik | 0.0000 | No |
| 6390 | 1700069B07Rik | 0.0000 | No |
| 6391 | 1700069L16Rik | 0.0000 | No |

|      |               |        |    |
|------|---------------|--------|----|
| 6392 | 1700069P05Rik | 0.0000 | No |
| 6393 | 1700071G01Rik | 0.0000 | No |
| 6394 | 1700071K01Rik | 0.0000 | No |
| 6395 | 1700071M16Rik | 0.0000 | No |
| 6396 | 1700072B07Rik | 0.0000 | No |
| 6397 | 1700072O05Rik | 0.0000 | No |
| 6398 | 1700073E17Rik | 0.0000 | No |
| 6399 | 1700074A21Rik | 0.0000 | No |
| 6400 | 1700074H08Rik | 0.0000 | No |
| 6401 | 1700074P13Rik | 0.0000 | No |
| 6402 | 1700080E11Rik | 0.0000 | No |
| 6403 | 1700080N15Rik | 0.0000 | No |
| 6404 | 1700080O16Rik | 0.0000 | No |
| 6405 | 1700081H04Rik | 0.0000 | No |
| 6406 | 1700082M22Rik | 0.0000 | No |
| 6407 | 1700083H02Rik | 0.0000 | No |
| 6408 | 1700084C06Rik | 0.0000 | No |
| 6409 | 1700084E18Rik | 0.0000 | No |
| 6410 | 1700084F23Rik | 0.0000 | No |
| 6411 | 1700084M14Rik | 0.0000 | No |
| 6412 | 1700085C21Rik | 0.0000 | No |
| 6413 | 1700086D15Rik | 0.0000 | No |
| 6414 | 1700086L19Rik | 0.0000 | No |
| 6415 | 1700086O06Rik | 0.0000 | No |
| 6416 | 1700086P04Rik | 0.0000 | No |
| 6417 | 1700088E04Rik | 0.0000 | No |
| 6418 | 1700091H14Rik | 0.0000 | No |
| 6419 | 1700092C02Rik | 0.0000 | No |
| 6420 | 1700092C10Rik | 0.0000 | No |
| 6421 | 1700092C17Rik | 0.0000 | No |
| 6422 | 1700092K14Rik | 0.0000 | No |
| 6423 | 1700092M07Rik | 0.0000 | No |
| 6424 | 1700093J21Rik | 0.0000 | No |
| 6425 | 1700093K21Rik | 0.0000 | No |
| 6426 | 1700094J05Rik | 0.0000 | No |
| 6427 | 1700094M24Rik | 0.0000 | No |
| 6428 | 1700095A13Rik | 0.0000 | No |
| 6429 | 1700095J03Rik | 0.0000 | No |
| 6430 | 1700095J07Rik | 0.0000 | No |
| 6431 | 1700095J12Rik | 0.0000 | No |
| 6432 | 1700095K22Rik | 0.0000 | No |
| 6433 | 1700096J18Rik | 0.0000 | No |
| 6434 | 1700096K18Rik | 0.0000 | No |
| 6435 | 1700097N02Rik | 0.0000 | No |
| 6436 | 1700099I09Rik | 0.0000 | No |
| 6437 | 1700100L14Rik | 0.0000 | No |

|      |               |        |    |
|------|---------------|--------|----|
| 6438 | 1700101I11Rik | 0.0000 | No |
| 6439 | 1700101I19Rik | 0.0000 | No |
| 6440 | 1700101O22Rik | 0.0000 | No |
| 6441 | 1700102P08Rik | 0.0000 | No |
| 6442 | 1700104B16Rik | 0.0000 | No |
| 6443 | 1700105P06Rik | 0.0000 | No |
| 6444 | 1700108F19Rik | 0.0000 | No |
| 6445 | 1700108N11Rik | 0.0000 | No |
| 6446 | 1700109G14Rik | 0.0000 | No |
| 6447 | 1700109G15Rik | 0.0000 | No |
| 6448 | 1700109H08Rik | 0.0000 | No |
| 6449 | 1700109I08Rik | 0.0000 | No |
| 6450 | 1700109K24Rik | 0.0000 | No |
| 6451 | 1700110C19Rik | 0.0000 | No |
| 6452 | 1700110I01Rik | 0.0000 | No |
| 6453 | 1700110I07Rik | 0.0000 | No |
| 6454 | 1700110K17Rik | 0.0000 | No |
| 6455 | 1700111N16Rik | 0.0000 | No |
| 6456 | 1700112J16Rik | 0.0000 | No |
| 6457 | 1700112K13Rik | 0.0000 | No |
| 6458 | 1700113A16Rik | 0.0000 | No |
| 6459 | 1700113B19Rik | 0.0000 | No |
| 6460 | 1700116B05Rik | 0.0000 | No |
| 6461 | 1700119H24Rik | 0.0000 | No |
| 6462 | 1700119I11Rik | 0.0000 | No |
| 6463 | 1700120B22Rik | 0.0000 | No |
| 6464 | 1700120C14Rik | 0.0000 | No |
| 6465 | 1700120C18Rik | 0.0000 | No |
| 6466 | 1700120E14Rik | 0.0000 | No |
| 6467 | 1700120G07Rik | 0.0000 | No |
| 6468 | 1700120K04Rik | 0.0000 | No |
| 6469 | 1700120O09Rik | 0.0000 | No |
| 6470 | 1700121L03Rik | 0.0000 | No |
| 6471 | 1700121L16Rik | 0.0000 | No |
| 6472 | 1700121N20Rik | 0.0000 | No |
| 6473 | 1700122D07Rik | 0.0000 | No |
| 6474 | 1700122E12Rik | 0.0000 | No |
| 6475 | 1700122O11Rik | 0.0000 | No |
| 6476 | 1700123K08Rik | 0.0000 | No |
| 6477 | 1700123L14Rik | 0.0000 | No |
| 6478 | 1700123M08Rik | 0.0000 | No |
| 6479 | 1700123O21Rik | 0.0000 | No |
| 6480 | 1700124L16Rik | 0.0000 | No |
| 6481 | 1700125G02Rik | 0.0000 | No |
| 6482 | 1700125H03Rik | 0.0000 | No |
| 6483 | 1700125H20Rik | 0.0000 | No |

|      |               |        |    |
|------|---------------|--------|----|
| 6484 | 1700126A01Rik | 0.0000 | No |
| 6485 | 1700126G02Rik | 0.0000 | No |
| 6486 | 1700126H18Rik | 0.0000 | No |
| 6487 | 1700128A07Rik | 0.0000 | No |
| 6488 | 1700128E19Rik | 0.0000 | No |
| 6489 | 1700128F08Rik | 0.0000 | No |
| 6490 | 1700129C05Rik | 0.0000 | No |
| 6491 | 1700129L04Rik | 0.0000 | No |
| 6492 | 1810006J02Rik | 0.0000 | No |
| 6493 | 1810007C17Rik | 0.0000 | No |
| 6494 | 1810007D17Rik | 0.0000 | No |
| 6495 | 1810008B01Rik | 0.0000 | No |
| 6496 | 1810008I18Rik | 0.0000 | No |
| 6497 | 1810009A15Rik | 0.0000 | No |
| 6498 | 1810009J06Rik | 0.0000 | No |
| 6499 | 1810010D01Rik | 0.0000 | No |
| 6500 | 1810010H24Rik | 0.0000 | No |
| 6501 | 1810010K12Rik | 0.0000 | No |
| 6502 | 1810011H11Rik | 0.0000 | No |
| 6503 | 1810011O10Rik | 0.0000 | No |
| 6504 | 1810012K08Rik | 0.0000 | No |
| 6505 | 1810012K16Rik | 0.0000 | No |
| 6506 | 1810013D15Rik | 0.0000 | No |
| 6507 | 1810013L24Rik | 0.0000 | No |
| 6508 | 1810014B01Rik | 0.0000 | No |
| 6509 | 1810017P11Rik | 0.0000 | No |
| 6510 | 1810019D21Rik | 0.0000 | No |
| 6511 | 1810019N24Rik | 0.0000 | No |
| 6512 | 1810021B22Rik | 0.0000 | No |
| 6513 | 1810022K09Rik | 0.0000 | No |
| 6514 | 1810024B03Rik | 0.0000 | No |
| 6515 | 1810026B05Rik | 0.0000 | No |
| 6516 | 1810026J23Rik | 0.0000 | No |
| 6517 | 1810030O07Rik | 0.0000 | No |
| 6518 | 1810032O08Rik | 0.0000 | No |
| 6519 | 1810034E14Rik | 0.0000 | No |
| 6520 | 1810037I17Rik | 0.0000 | No |
| 6521 | 1810041H14Rik | 0.0000 | No |
| 6522 | 1810041L15Rik | 0.0000 | No |
| 6523 | 1810043G02Rik | 0.0000 | No |
| 6524 | 1810044D09Rik | 0.0000 | No |
| 6525 | 1810049J17Rik | 0.0000 | No |
| 6526 | 1810053B23Rik | 0.0000 | No |
| 6527 | 1810055G02Rik | 0.0000 | No |
| 6528 | 1810058I24Rik | 0.0000 | No |
| 6529 | 1810059C17Rik | 0.0000 | No |

|      |               |        |    |
|------|---------------|--------|----|
| 6530 | 1810059H22Rik | 0.0000 | No |
| 6531 | 1810062G17Rik | 0.0000 | No |
| 6532 | 1810062O18Rik | 0.0000 | No |
| 6533 | 1810063I02Rik | 0.0000 | No |
| 6534 | 1810064F22Rik | 0.0000 | No |
| 6535 | 1810065E05Rik | 0.0000 | No |
| 6536 | 2010001A14Rik | 0.0000 | No |
| 6537 | 2010001K21Rik | 0.0000 | No |
| 6538 | 2010005H15Rik | 0.0000 | No |
| 6539 | 2010008C14Rik | 0.0000 | No |
| 6540 | 2010009K17Rik | 0.0000 | No |
| 6541 | 2010010A06Rik | 0.0000 | No |
| 6542 | 2010013B24Rik | 0.0000 | No |
| 6543 | 2010015M23Rik | 0.0000 | No |
| 6544 | 2010016I18Rik | 0.0000 | No |
| 6545 | 2010103J01Rik | 0.0000 | No |
| 6546 | 2010106C02Rik | 0.0000 | No |
| 6547 | 2010106E10Rik | 0.0000 | No |
| 6548 | 2010107E04Rik | 0.0000 | No |
| 6549 | 2010107G23Rik | 0.0000 | No |
| 6550 | 2010109A12Rik | 0.0000 | No |
| 6551 | 2010109I03Rik | 0.0000 | No |
| 6552 | 2010109P13Rik | 0.0000 | No |
| 6553 | 2010110E17Rik | 0.0000 | No |
| 6554 | 2010110G14Rik | 0.0000 | No |
| 6555 | 2010110K18Rik | 0.0000 | No |
| 6556 | 2010204K13Rik | 0.0000 | No |
| 6557 | 2010300C02Rik | 0.0000 | No |
| 6558 | 2010310C07Rik | 0.0000 | No |
| 6559 | 2010320M18Rik | 0.0000 | No |
| 6560 | 2010320O07Rik | 0.0000 | No |
| 6561 | 2200002A13Rik | 0.0000 | No |
| 6562 | 2200002D01Rik | 0.0000 | No |
| 6563 | 2200002J24Rik | 0.0000 | No |
| 6564 | 2200007N16Rik | 0.0000 | No |
| 6565 | 2210008F06Rik | 0.0000 | No |
| 6566 | 2210010C04Rik | 0.0000 | No |
| 6567 | 2210011C24Rik | 0.0000 | No |
| 6568 | 2210011K15Rik | 0.0000 | No |
| 6569 | 2210013O21Rik | 0.0000 | No |
| 6570 | 2210016F16Rik | 0.0000 | No |
| 6571 | 2210016L21Rik | 0.0000 | No |
| 6572 | 2210017I01Rik | 0.0000 | No |
| 6573 | 2210406H18Rik | 0.0000 | No |
| 6574 | 2210406O10Rik | 0.0000 | No |
| 6575 | 2210407C18Rik | 0.0000 | No |

|      |               |        |    |
|------|---------------|--------|----|
| 6576 | 2210408F21Rik | 0.0000 | No |
| 6577 | 2210408I21Rik | 0.0000 | No |
| 6578 | 2210409E12Rik | 0.0000 | No |
| 6579 | 2210411M09Rik | 0.0000 | No |
| 6580 | 2210414B05Rik | 0.0000 | No |
| 6581 | 2210417A02Rik | 0.0000 | No |
| 6582 | 2210418O10Rik | 0.0000 | No |
| 6583 | 2210420H20Rik | 0.0000 | No |
| 6584 | 2300003K06Rik | 0.0000 | No |
| 6585 | 2300009A05Rik | 0.0000 | No |
| 6586 | 2310001H17Rik | 0.0000 | No |
| 6587 | 2310001K24Rik | 0.0000 | No |
| 6588 | 2310002F09Rik | 0.0000 | No |
| 6589 | 2310002L09Rik | 0.0000 | No |
| 6590 | 2310003L06Rik | 0.0000 | No |
| 6591 | 2310005A03Rik | 0.0000 | No |
| 6592 | 2310005E17Rik | 0.0000 | No |
| 6593 | 2310009A05Rik | 0.0000 | No |
| 6594 | 2310009B15Rik | 0.0000 | No |
| 6595 | 2310010J17Rik | 0.0000 | No |
| 6596 | 2310011J03Rik | 0.0000 | No |
| 6597 | 2310014F06Rik | 0.0000 | No |
| 6598 | 2310015A10Rik | 0.0000 | No |
| 6599 | 2310015D24Rik | 0.0000 | No |
| 6600 | 2310015K22Rik | 0.0000 | No |
| 6601 | 2310016D03Rik | 0.0000 | No |
| 6602 | 2310016D23Rik | 0.0000 | No |
| 6603 | 2310020H05Rik | 0.0000 | No |
| 6604 | 2310022A10Rik | 0.0000 | No |
| 6605 | 2310022B05Rik | 0.0000 | No |
| 6606 | 2310026I22Rik | 0.0000 | No |
| 6607 | 2310026L22Rik | 0.0000 | No |
| 6608 | 2310030G06Rik | 0.0000 | No |
| 6609 | 2310031A07Rik | 0.0000 | No |
| 6610 | 2310033P09Rik | 0.0000 | No |
| 6611 | 2310034C09Rik | 0.0000 | No |
| 6612 | 2310034G01Rik | 0.0000 | No |
| 6613 | 2310034O05Rik | 0.0000 | No |
| 6614 | 2310035C23Rik | 0.0000 | No |
| 6615 | 2310036O22Rik | 0.0000 | No |
| 6616 | 2310039H08Rik | 0.0000 | No |
| 6617 | 2310039L15Rik | 0.0000 | No |
| 6618 | 2310040G07Rik | 0.0000 | No |
| 6619 | 2310040G24Rik | 0.0000 | No |
| 6620 | 2310043L19Rik | 0.0000 | No |
| 6621 | 2310043M15Rik | 0.0000 | No |



|      |               |        |    |
|------|---------------|--------|----|
| 6622 | 2310043O21Rik | 0.0000 | No |
| 6623 | 2310043P16Rik | 0.0000 | No |
| 6624 | 2310044K18Rik | 0.0000 | No |
| 6625 | 2310046K23Rik | 0.0000 | No |
| 6626 | 2310047D07Rik | 0.0000 | No |
| 6627 | 2310050C09Rik | 0.0000 | No |
| 6628 | 2310057J18Rik | 0.0000 | No |
| 6629 | 2310057M21Rik | 0.0000 | No |
| 6630 | 2310057N15Rik | 0.0000 | No |
| 6631 | 2310058D17Rik | 0.0000 | No |
| 6632 | 2310061I04Rik | 0.0000 | No |
| 6633 | 2310061N02Rik | 0.0000 | No |
| 6634 | 2310065F04Rik | 0.0000 | No |
| 6635 | 2310068J16Rik | 0.0000 | No |
| 6636 | 2310069B03Rik | 0.0000 | No |
| 6637 | 2310069G16Rik | 0.0000 | No |
| 6638 | 2310075C17Rik | 0.0000 | No |
| 6639 | 2410002F23Rik | 0.0000 | No |
| 6640 | 2410003L11Rik | 0.0000 | No |
| 6641 | 2410004B18Rik | 0.0000 | No |
| 6642 | 2410004I01Rik | 0.0000 | No |
| 6643 | 2410004P03Rik | 0.0000 | No |
| 6644 | 2410006H16Rik | 0.0000 | No |
| 6645 | 2410012E07Rik | 0.0000 | No |
| 6646 | 2410015M20Rik | 0.0000 | No |
| 6647 | 2410016O06Rik | 0.0000 | No |
| 6648 | 2410017I17Rik | 0.0000 | No |
| 6649 | 2410022M11Rik | 0.0000 | No |
| 6650 | 2410024N13Rik | 0.0000 | No |
| 6651 | 2410089E03Rik | 0.0000 | No |
| 6652 | 2410124H12Rik | 0.0000 | No |
| 6653 | 2410131K14Rik | 0.0000 | No |
| 6654 | 2410141K09Rik | 0.0000 | No |
| 6655 | 2410152P15Rik | 0.0000 | No |
| 6656 | 2500002B13Rik | 0.0000 | No |
| 6657 | 2500004C02Rik | 0.0000 | No |
| 6658 | 2510002D24Rik | 0.0000 | No |
| 6659 | 2510009E07Rik | 0.0000 | No |
| 6660 | 2510016D11Rik | 0.0000 | No |
| 6661 | 2510017J16Rik | 0.0000 | No |
| 6662 | 2510039O18Rik | 0.0000 | No |
| 6663 | 2510046G10Rik | 0.0000 | No |
| 6664 | 2600014E21Rik | 0.0000 | No |
| 6665 | 2610001J05Rik | 0.0000 | No |
| 6666 | 2610002M06Rik | 0.0000 | No |
| 6667 | 2610005L07Rik | 0.0000 | No |

|      |                |        |    |
|------|----------------|--------|----|
| 6668 | 2610008E11Rik  | 0.0000 | No |
| 6669 | 2610011E03Rik  | 0.0000 | No |
| 6670 | 2610012C04Rik  | 0.0000 | No |
| 6671 | 2610016A17Rik  | 0.0000 | No |
| 6672 | 2610020C07Rik  | 0.0000 | No |
| 6673 | 2610020F03Rik  | 0.0000 | No |
| 6674 | 2610020H08Rik  | 0.0000 | No |
| 6675 | 2610021A01Rik  | 0.0000 | No |
| 6676 | 2610024D14Rik  | 0.0000 | No |
| 6677 | 2610027F03Rik  | 0.0000 | No |
| 6678 | 2610027K06Rik  | 0.0000 | No |
| 6679 | 2610028E06Rik  | 0.0000 | No |
| 6680 | 2610028H24Rik  | 0.0000 | No |
| 6681 | 2610034O05Rik  | 0.0000 | No |
| 6682 | 2610035D17Rik  | 0.0000 | No |
| 6683 | 2610035F20Rik  | 0.0000 | No |
| 6684 | 2610037D02Rik  | 0.0000 | No |
| 6685 | 2610042L04Rik  | 0.0000 | No |
| 6686 | 2610044O15Rik8 | 0.0000 | No |
| 6687 | 2610105M22Rik  | 0.0000 | No |
| 6688 | 2610203C20Rik  | 0.0000 | No |
| 6689 | 2610203C22Rik  | 0.0000 | No |
| 6690 | 2610204G07Rik  | 0.0000 | No |
| 6691 | 2610206C17Rik  | 0.0000 | No |
| 6692 | 2610300A13Rik  | 0.0000 | No |
| 6693 | 2610301B20Rik  | 0.0000 | No |
| 6694 | 2610303G11Rik  | 0.0000 | No |
| 6695 | 2610306M01Rik  | 0.0000 | No |
| 6696 | 2610306O10Rik  | 0.0000 | No |
| 6697 | 2610307P16Rik  | 0.0000 | No |
| 6698 | 2610316D01Rik  | 0.0000 | No |
| 6699 | 2610318N02Rik  | 0.0000 | No |
| 6700 | 2610507B11Rik  | 0.0000 | No |
| 6701 | 2610507I01Rik  | 0.0000 | No |
| 6702 | 2610524H06Rik  | 0.0000 | No |
| 6703 | 2610528A11Rik  | 0.0000 | No |
| 6704 | 2610528J11Rik  | 0.0000 | No |
| 6705 | 2700012I20Rik  | 0.0000 | No |
| 6706 | 2700016F22Rik  | 0.0000 | No |
| 6707 | 2700029L08Rik  | 0.0000 | No |
| 6708 | 2700038G22Rik  | 0.0000 | No |
| 6709 | 2700046A07Rik  | 0.0000 | No |
| 6710 | 2700046G09Rik  | 0.0000 | No |
| 6711 | 2700049A03Rik  | 0.0000 | No |
| 6712 | 2700060E02Rik  | 0.0000 | No |
| 6713 | 2700062C07Rik  | 0.0000 | No |

|      |               |        |    |
|------|---------------|--------|----|
| 6714 | 2700068H02Rik | 0.0000 | No |
| 6715 | 2700078F05Rik | 0.0000 | No |
| 6716 | 2700080J24Rik | 0.0000 | No |
| 6717 | 2700081O15Rik | 0.0000 | No |
| 6718 | 2700097O09Rik | 0.0000 | No |
| 6719 | 2700099C18Rik | 0.0000 | No |
| 6720 | 2810001G20Rik | 0.0000 | No |
| 6721 | 2810002D19Rik | 0.0000 | No |
| 6722 | 2810004N23Rik | 0.0000 | No |
| 6723 | 2810006K23Rik | 0.0000 | No |
| 6724 | 2810013P06Rik | 0.0000 | No |
| 6725 | 2810021J22Rik | 0.0000 | No |
| 6726 | 2810025M15Rik | 0.0000 | No |
| 6727 | 2810029C07Rik | 0.0000 | No |
| 6728 | 2810032G03Rik | 0.0000 | No |
| 6729 | 2810039B14Rik | 0.0000 | No |
| 6730 | 2810049E08Rik | 0.0000 | No |
| 6731 | 2810403A07Rik | 0.0000 | No |
| 6732 | 2810403D21Rik | 0.0000 | No |
| 6733 | 2810404F17Rik | 0.0000 | No |
| 6734 | 2810405F15Rik | 0.0000 | No |
| 6735 | 2810405F17Rik | 0.0000 | No |
| 6736 | 2810407A14Rik | 0.0000 | No |
| 6737 | 2810408A11Rik | 0.0000 | No |
| 6738 | 2810408I11Rik | 0.0000 | No |
| 6739 | 2810410L24Rik | 0.0000 | No |
| 6740 | 2810414N06Rik | 0.0000 | No |
| 6741 | 2810417H13Rik | 0.0000 | No |
| 6742 | 2810425M01Rik | 0.0000 | No |
| 6743 | 2810428I15Rik | 0.0000 | No |
| 6744 | 2810428J06Rik | 0.0000 | No |
| 6745 | 2810429I04Rik | 0.0000 | No |
| 6746 | 2810430I11Rik | 0.0000 | No |
| 6747 | 2810432F15Rik | 0.0000 | No |
| 6748 | 2810442N19Rik | 0.0000 | No |
| 6749 | 2810454H06Rik | 0.0000 | No |
| 6750 | 2810455O05Rik | 0.0000 | No |
| 6751 | 2810459M11Rik | 0.0000 | No |
| 6752 | 2810468N07Rik | 0.0000 | No |
| 6753 | 2810474O19Rik | 0.0000 | No |
| 6754 | 2900002M20Rik | 0.0000 | No |
| 6755 | 2900005J15Rik | 0.0000 | No |
| 6756 | 2900009J06Rik | 0.0000 | No |
| 6757 | 2900011O08Rik | 0.0000 | No |
| 6758 | 2900018N21Rik | 0.0000 | No |
| 6759 | 2900022M07Rik | 0.0000 | No |

|      |               |        |    |
|------|---------------|--------|----|
| 6760 | 2900026A02Rik | 0.0000 | No |
| 6761 | 2900027M19Rik | 0.0000 | No |
| 6762 | 2900037B21Rik | 0.0000 | No |
| 6763 | 2900041M22Rik | 0.0000 | No |
| 6764 | 2900042K21Rik | 0.0000 | No |
| 6765 | 2900052L18Rik | 0.0000 | No |
| 6766 | 2900052N01Rik | 0.0000 | No |
| 6767 | 2900055J20Rik | 0.0000 | No |
| 6768 | 2900060B14Rik | 0.0000 | No |
| 6769 | 2900064F13Rik | 0.0000 | No |
| 6770 | 2900064K03Rik | 0.0000 | No |
| 6771 | 2900069G24Rik | 0.0000 | No |
| 6772 | 2900076A07Rik | 0.0000 | No |
| 6773 | 2900076G11Rik | 0.0000 | No |
| 6774 | 2900079G21Rik | 0.0000 | No |
| 6775 | 2900089D17Rik | 0.0000 | No |
| 6776 | 2900092O11Rik | 0.0000 | No |
| 6777 | 2900093K20Rik | 0.0000 | No |
| 6778 | 2900097C17Rik | 0.0000 | No |
| 6779 | 3000002C10Rik | 0.0000 | No |
| 6780 | 3010001F23Rik | 0.0000 | No |
| 6781 | 3010003L21Rik | 0.0000 | No |
| 6782 | 3010026O09Rik | 0.0000 | No |
| 6783 | 3100002H09Rik | 0.0000 | No |
| 6784 | 3100003L05Rik | 0.0000 | No |
| 6785 | 3110001I22Rik | 0.0000 | No |
| 6786 | 3110002H16Rik | 0.0000 | No |
| 6787 | 3110004A20Rik | 0.0000 | No |
| 6788 | 3110009E18Rik | 0.0000 | No |
| 6789 | 3110018I06Rik | 0.0000 | No |
| 6790 | 3110021N24Rik | 0.0000 | No |
| 6791 | 3110031N09Rik | 0.0000 | No |
| 6792 | 3110035E14Rik | 0.0000 | No |
| 6793 | 3110039M20Rik | 0.0000 | No |
| 6794 | 3110040N11Rik | 0.0000 | No |
| 6795 | 3110043O21Rik | 0.0000 | No |
| 6796 | 3110045C21Rik | 0.0000 | No |
| 6797 | 3110053B16Rik | 0.0000 | No |
| 6798 | 3110056K07Rik | 0.0000 | No |
| 6799 | 3110062G12Rik | 0.0000 | No |
| 6800 | 3110062M04Rik | 0.0000 | No |
| 6801 | 3110067C02Rik | 0.0000 | No |
| 6802 | 3110079O15Rik | 0.0000 | No |
| 6803 | 3110080E11Rik | 0.0000 | No |
| 6804 | 3110080O07Rik | 0.0000 | No |
| 6805 | 3110082I17Rik | 0.0000 | No |

|      |               |        |    |
|------|---------------|--------|----|
| 6806 | 3110082J24Rik | 0.0000 | No |
| 6807 | 3110083C13Rik | 0.0000 | No |
| 6808 | 3110099E03Rik | 0.0000 | No |
| 6809 | 3222401L13Rik | 0.0000 | No |
| 6810 | 3300002A11Rik | 0.0000 | No |
| 6811 | 3300002I08Rik | 0.0000 | No |
| 6812 | 3300002P13Rik | 0.0000 | No |
| 6813 | 3425401B19Rik | 0.0000 | No |
| 6814 | -343C11.2     | 0.0000 | No |
| 6815 | 3632451O06Rik | 0.0000 | No |
| 6816 | 3632454L22Rik | 0.0000 | No |
| 6817 | 3830403N18Rik | 0.0000 | No |
| 6818 | 3830406C13Rik | 0.0000 | No |
| 6819 | 3830408C21Rik | 0.0000 | No |
| 6820 | 3830432H09Rik | 0.0000 | No |
| 6821 | 3930402G23Rik | 0.0000 | No |
| 6822 | 4430402I18Rik | 0.0000 | No |
| 6823 | 4631405J19Rik | 0.0000 | No |
| 6824 | 4631405K08Rik | 0.0000 | No |
| 6825 | 4632404H12Rik | 0.0000 | No |
| 6826 | 4632404M16Rik | 0.0000 | No |
| 6827 | 4632411P08Rik | 0.0000 | No |
| 6828 | 4632415L05Rik | 0.0000 | No |
| 6829 | 4632427E13Rik | 0.0000 | No |
| 6830 | 4632428C04Rik | 0.0000 | No |
| 6831 | 4632432E15Rik | 0.0000 | No |
| 6832 | 4633401B06Rik | 0.0000 | No |
| 6833 | 4731419I09Rik | 0.0000 | No |
| 6834 | 4732414G09Rik | 0.0000 | No |
| 6835 | 4732416N19Rik | 0.0000 | No |
| 6836 | 4732419C18Rik | 0.0000 | No |
| 6837 | 4732440D04Rik | 0.0000 | No |
| 6838 | 4732463B04Rik | 0.0000 | No |
| 6839 | 4732465J04Rik | 0.0000 | No |
| 6840 | 4732471J01Rik | 0.0000 | No |
| 6841 | 4732487G21Rik | 0.0000 | No |
| 6842 | 4732490B19Rik | 0.0000 | No |
| 6843 | 4732496C06Rik | 0.0000 | No |
| 6844 | 4831440E17Rik | 0.0000 | No |
| 6845 | 4833403J16Rik | 0.0000 | No |
| 6846 | 4833404L02Rik | 0.0000 | No |
| 6847 | 4833407H14Rik | 0.0000 | No |
| 6848 | 4833411C07Rik | 0.0000 | No |
| 6849 | 4833412C05Rik | 0.0000 | No |
| 6850 | 4833412K13Rik | 0.0000 | No |
| 6851 | 4833413G10Rik | 0.0000 | No |

|      |               |        |    |
|------|---------------|--------|----|
| 6852 | 4833417C18Rik | 0.0000 | No |
| 6853 | 4833418N02Rik | 0.0000 | No |
| 6854 | 4833418N17Rik | 0.0000 | No |
| 6855 | 4833420G17Rik | 0.0000 | No |
| 6856 | 4833421G17Rik | 0.0000 | No |
| 6857 | 4833422C13Rik | 0.0000 | No |
| 6858 | 4833422M21Rik | 0.0000 | No |
| 6859 | 4833423E24Rik | 0.0000 | No |
| 6860 | 4833427F10Rik | 0.0000 | No |
| 6861 | 4833439L19Rik | 0.0000 | No |
| 6862 | 4833445I07Rik | 0.0000 | No |
| 6863 | 4921501E09Rik | 0.0000 | No |
| 6864 | 4921504E06Rik | 0.0000 | No |
| 6865 | 4921507G05Rik | 0.0000 | No |
| 6866 | 4921507P07Rik | 0.0000 | No |
| 6867 | 4921509A06Rik | 0.0000 | No |
| 6868 | 4921509C19Rik | 0.0000 | No |
| 6869 | 4921511C10Rik | 0.0000 | No |
| 6870 | 4921511E07Rik | 0.0000 | No |
| 6871 | 4921511M17Rik | 0.0000 | No |
| 6872 | 4921513I03Rik | 0.0000 | No |
| 6873 | 4921513I08Rik | 0.0000 | No |
| 6874 | 4921515E04Rik | 0.0000 | No |
| 6875 | 4921517D22Rik | 0.0000 | No |
| 6876 | 4921518K17Rik | 0.0000 | No |
| 6877 | 4921521D15Rik | 0.0000 | No |
| 6878 | 4921522P10Rik | 0.0000 | No |
| 6879 | 4921523L03Rik | 0.0000 | No |
| 6880 | 4921524J17Rik | 0.0000 | No |
| 6881 | 4921524L21Rik | 0.0000 | No |
| 6882 | 4921527H02Rik | 0.0000 | No |
| 6883 | 4921530L21Rik | 0.0000 | No |
| 6884 | 4921531C22Rik | 0.0000 | No |
| 6885 | 4921534H16Rik | 0.0000 | No |
| 6886 | 4921536K21Rik | 0.0000 | No |
| 6887 | 4921539E11Rik | 0.0000 | No |
| 6888 | 4921539H07Rik | 0.0000 | No |
| 6889 | 4922502D21Rik | 0.0000 | No |
| 6890 | 4922502N22Rik | 0.0000 | No |
| 6891 | 4930401G09Rik | 0.0000 | No |
| 6892 | 4930401O10Rik | 0.0000 | No |
| 6893 | 4930402C01Rik | 0.0000 | No |
| 6894 | 4930402F06Rik | 0.0000 | No |
| 6895 | 4930402F11Rik | 0.0000 | No |
| 6896 | 4930402H05Rik | 0.0000 | No |
| 6897 | 4930402H24Rik | 0.0000 | No |

|      |               |        |    |
|------|---------------|--------|----|
| 6898 | 4930402K13Rik | 0.0000 | No |
| 6899 | 4930403D09Rik | 0.0000 | No |
| 6900 | 4930403P22Rik | 0.0000 | No |
| 6901 | 4930404A12Rik | 0.0000 | No |
| 6902 | 4930404I05Rik | 0.0000 | No |
| 6903 | 4930404N11Rik | 0.0000 | No |
| 6904 | 4930405A21Rik | 0.0000 | No |
| 6905 | 4930405D11Rik | 0.0000 | No |
| 6906 | 4930405L22Rik | 0.0000 | No |
| 6907 | 4930405O22Rik | 0.0000 | No |
| 6908 | 4930406D18Rik | 0.0000 | No |
| 6909 | 4930407I10Rik | 0.0000 | No |
| 6910 | 4930408K08Rik | 0.0000 | No |
| 6911 | 4930408O17Rik | 0.0000 | No |
| 6912 | 4930412B13Rik | 0.0000 | No |
| 6913 | 4930412E21Rik | 0.0000 | No |
| 6914 | 4930412F09Rik | 0.0000 | No |
| 6915 | 4930412F12Rik | 0.0000 | No |
| 6916 | 4930412L05Rik | 0.0000 | No |
| 6917 | 4930412M03Rik | 0.0000 | No |
| 6918 | 4930413E15Rik | 0.0000 | No |
| 6919 | 4930413G21Rik | 0.0000 | No |
| 6920 | 4930415F15Rik | 0.0000 | No |
| 6921 | 4930415H17Rik | 0.0000 | No |
| 6922 | 4930415L06Rik | 0.0000 | No |
| 6923 | 4930415O20Rik | 0.0000 | No |
| 6924 | 4930417H01Rik | 0.0000 | No |
| 6925 | 4930417O13Rik | 0.0000 | No |
| 6926 | 4930417O22Rik | 0.0000 | No |
| 6927 | 4930419G24Rik | 0.0000 | No |
| 6928 | 4930421C12Rik | 0.0000 | No |
| 6929 | 4930422M22Rik | 0.0000 | No |
| 6930 | 4930423C22Rik | 0.0000 | No |
| 6931 | 4930425K10Rik | 0.0000 | No |
| 6932 | 4930425L21Rik | 0.0000 | No |
| 6933 | 4930425O10Rik | 0.0000 | No |
| 6934 | 4930426I24Rik | 0.0000 | No |
| 6935 | 4930426L09Rik | 0.0000 | No |
| 6936 | 4930427A07Rik | 0.0000 | No |
| 6937 | 4930428N03Rik | 0.0000 | No |
| 6938 | 4930428O21Rik | 0.0000 | No |
| 6939 | 4930429D17Rik | 0.0000 | No |
| 6940 | 4930429F24Rik | 0.0000 | No |
| 6941 | 4930429H19Rik | 0.0000 | No |
| 6942 | 4930429P21Rik | 0.0000 | No |
| 6943 | 4930430A15Rik | 0.0000 | No |

|      |               |        |    |
|------|---------------|--------|----|
| 6944 | 4930430E12Rik | 0.0000 | No |
| 6945 | 4930430F08Rik | 0.0000 | No |
| 6946 | 4930430O22Rik | 0.0000 | No |
| 6947 | 4930431F12Rik | 0.0000 | No |
| 6948 | 4930431L21Rik | 0.0000 | No |
| 6949 | 4930431P03Rik | 0.0000 | No |
| 6950 | 4930431P19Rik | 0.0000 | No |
| 6951 | 4930432B10Rik | 0.0000 | No |
| 6952 | 4930432E11Rik | 0.0000 | No |
| 6953 | 4930432H08Rik | 0.0000 | No |
| 6954 | 4930432K21Rik | 0.0000 | No |
| 6955 | 4930432L08Rik | 0.0000 | No |
| 6956 | 4930432M17Rik | 0.0000 | No |
| 6957 | 4930433B08Rik | 0.0000 | No |
| 6958 | 4930433J02Rik | 0.0000 | No |
| 6959 | 4930433N12Rik | 0.0000 | No |
| 6960 | 4930434B07Rik | 0.0000 | No |
| 6961 | 4930434O05Rik | 0.0000 | No |
| 6962 | 4930435C17Rik | 0.0000 | No |
| 6963 | 4930435E12Rik | 0.0000 | No |
| 6964 | 4930435N07Rik | 0.0000 | No |
| 6965 | 4930438A08Rik | 0.0000 | No |
| 6966 | 4930438E09Rik | 0.0000 | No |
| 6967 | 4930439A04Rik | 0.0000 | No |
| 6968 | 4930440C22Rik | 0.0000 | No |
| 6969 | 4930440I19Rik | 0.0000 | No |
| 6970 | 4930441H08Rik | 0.0000 | No |
| 6971 | 4930441J16Rik | 0.0000 | No |
| 6972 | 4930442H23Rik | 0.0000 | No |
| 6973 | 4930442J19Rik | 0.0000 | No |
| 6974 | 4930442L01Rik | 0.0000 | No |
| 6975 | 4930442P19Rik | 0.0000 | No |
| 6976 | 4930443G03Rik | 0.0000 | No |
| 6977 | 4930444A19Rik | 0.0000 | No |
| 6978 | 4930444E06Rik | 0.0000 | No |
| 6979 | 4930444G20Rik | 0.0000 | No |
| 6980 | 4930444M15Rik | 0.0000 | No |
| 6981 | 4930444P10Rik | 0.0000 | No |
| 6982 | 4930445N08Rik | 0.0000 | No |
| 6983 | 4930445N18Rik | 0.0000 | No |
| 6984 | 4930447A16Rik | 0.0000 | No |
| 6985 | 4930447C04Rik | 0.0000 | No |
| 6986 | 4930447C11Rik | 0.0000 | No |
| 6987 | 4930447F04Rik | 0.0000 | No |
| 6988 | 4930447F24Rik | 0.0000 | No |
| 6989 | 4930447M23Rik | 0.0000 | No |



|      |               |        |    |
|------|---------------|--------|----|
| 6990 | 4930447N08Rik | 0.0000 | No |
| 6991 | 4930448A20Rik | 0.0000 | No |
| 6992 | 4930448D08Rik | 0.0000 | No |
| 6993 | 4930448E22Rik | 0.0000 | No |
| 6994 | 4930448H16Rik | 0.0000 | No |
| 6995 | 4930448K20Rik | 0.0000 | No |
| 6996 | 4930449A18Rik | 0.0000 | No |
| 6997 | 4930449E01Rik | 0.0000 | No |
| 6998 | 4930449I04Rik | 0.0000 | No |
| 6999 | 4930449I24Rik | 0.0000 | No |
| 7000 | 4930451E10Rik | 0.0000 | No |
| 7001 | 4930451G09Rik | 0.0000 | No |
| 7002 | 4930451I11Rik | 0.0000 | No |
| 7003 | 4930452B06Rik | 0.0000 | No |
| 7004 | 4930452N14Rik | 0.0000 | No |
| 7005 | 4930453H23Rik | 0.0000 | No |
| 7006 | 4930453L07Rik | 0.0000 | No |
| 7007 | 4930453N24Rik | 0.0000 | No |
| 7008 | 4930455B14Rik | 0.0000 | No |
| 7009 | 4930455D15Rik | 0.0000 | No |
| 7010 | 4930455G09Rik | 0.0000 | No |
| 7011 | 4930455H04Rik | 0.0000 | No |
| 7012 | 4930456G14Rik | 0.0000 | No |
| 7013 | 4930456L15Rik | 0.0000 | No |
| 7014 | 4930458B22Rik | 0.0000 | No |
| 7015 | 4930458D05Rik | 0.0000 | No |
| 7016 | 4930459L07Rik | 0.0000 | No |
| 7017 | 4930461C15Rik | 0.0000 | No |
| 7018 | 4930463O16Rik | 0.0000 | No |
| 7019 | 4930465K10Rik | 0.0000 | No |
| 7020 | 4930465M20Rik | 0.0000 | No |
| 7021 | 4930467D21Rik | 0.0000 | No |
| 7022 | 4930467E23Rik | 0.0000 | No |
| 7023 | 4930467K11Rik | 0.0000 | No |
| 7024 | 4930469B13Rik | 0.0000 | No |
| 7025 | 4930469G21Rik | 0.0000 | No |
| 7026 | 4930469K13Rik | 0.0000 | No |
| 7027 | 4930470G03Rik | 0.0000 | No |
| 7028 | 4930470P17Rik | 0.0000 | No |
| 7029 | 4930471C04Rik | 0.0000 | No |
| 7030 | 4930471C06Rik | 0.0000 | No |
| 7031 | 4930471D02Rik | 0.0000 | No |
| 7032 | 4930471M09Rik | 0.0000 | No |
| 7033 | 4930473A02Rik | 0.0000 | No |
| 7034 | 4930473D10Rik | 0.0000 | No |
| 7035 | 4930474B08Rik | 0.0000 | No |

|      |               |        |    |
|------|---------------|--------|----|
| 7036 | 4930474H06Rik | 0.0000 | No |
| 7037 | 4930474N05Rik | 0.0000 | No |
| 7038 | 4930477E14Rik | 0.0000 | No |
| 7039 | 4930478K11Rik | 0.0000 | No |
| 7040 | 4930478P22Rik | 0.0000 | No |
| 7041 | 4930479D17Rik | 0.0000 | No |
| 7042 | 4930480E11Rik | 0.0000 | No |
| 7043 | 4930480K23Rik | 0.0000 | No |
| 7044 | 4930481A15Rik | 0.0000 | No |
| 7045 | 4930481B07Rik | 0.0000 | No |
| 7046 | 4930483J18Rik | 0.0000 | No |
| 7047 | 4930483K19Rik | 0.0000 | No |
| 7048 | 4930483O08Rik | 0.0000 | No |
| 7049 | 4930486L24Rik | 0.0000 | No |
| 7050 | 4930486N12Rik | 0.0000 | No |
| 7051 | 4930487D11Rik | 0.0000 | No |
| 7052 | 4930500F04Rik | 0.0000 | No |
| 7053 | 4930500F10Rik | 0.0000 | No |
| 7054 | 4930500M09Rik | 0.0000 | No |
| 7055 | 4930502C17Rik | 0.0000 | No |
| 7056 | 4930502E09Rik | 0.0000 | No |
| 7057 | 4930503B20Rik | 0.0000 | No |
| 7058 | 4930503H13Rik | 0.0000 | No |
| 7059 | 4930503L19Rik | 0.0000 | No |
| 7060 | 4930503O07Rik | 0.0000 | No |
| 7061 | 4930504D19Rik | 0.0000 | No |
| 7062 | 4930505A04Rik | 0.0000 | No |
| 7063 | 4930505G20Rik | 0.0000 | No |
| 7064 | 4930505N22Rik | 0.0000 | No |
| 7065 | 4930505O20Rik | 0.0000 | No |
| 7066 | 4930506C21Rik | 0.0000 | No |
| 7067 | 4930507D05Rik | 0.0000 | No |
| 7068 | 4930507D10Rik | 0.0000 | No |
| 7069 | 4930509E16Rik | 0.0000 | No |
| 7070 | 4930509G22Rik | 0.0000 | No |
| 7071 | 4930509H03Rik | 0.0000 | No |
| 7072 | 4930509J09Rik | 0.0000 | No |
| 7073 | 4930510E17Rik | 0.0000 | No |
| 7074 | 4930511A02Rik | 0.0000 | No |
| 7075 | 4930511E03Rik | 0.0000 | No |
| 7076 | 4930511M06Rik | 0.0000 | No |
| 7077 | 4930511M18Rik | 0.0000 | No |
| 7078 | 4930511O05Rik | 0.0000 | No |
| 7079 | 4930512B01Rik | 0.0000 | No |
| 7080 | 4930512H18Rik | 0.0000 | No |
| 7081 | 4930512M02Rik | 0.0000 | No |

|      |               |        |    |
|------|---------------|--------|----|
| 7082 | 4930512P04Rik | 0.0000 | No |
| 7083 | 4930513D17Rik | 0.0000 | No |
| 7084 | 4930513N10Rik | 0.0000 | No |
| 7085 | 4930513O06Rik | 0.0000 | No |
| 7086 | 4930515G01Rik | 0.0000 | No |
| 7087 | 4930515G13Rik | 0.0000 | No |
| 7088 | 4930515G16Rik | 0.0000 | No |
| 7089 | 4930515L19Rik | 0.0000 | No |
| 7090 | 4930516B21Rik | 0.0000 | No |
| 7091 | 4930516K23Rik | 0.0000 | No |
| 7092 | 4930517E11Rik | 0.0000 | No |
| 7093 | 4930517G19Rik | 0.0000 | No |
| 7094 | 4930517L18Rik | 0.0000 | No |
| 7095 | 4930517O19Rik | 0.0000 | No |
| 7096 | 4930518C09Rik | 0.0000 | No |
| 7097 | 4930518I15Rik | 0.0000 | No |
| 7098 | 4930518J20Rik | 0.0000 | No |
| 7099 | 4930519A11Rik | 0.0000 | No |
| 7100 | 4930519E07Rik | 0.0000 | No |
| 7101 | 4930519F09Rik | 0.0000 | No |
| 7102 | 4930519F16Rik | 0.0000 | No |
| 7103 | 4930519G04Rik | 0.0000 | No |
| 7104 | 4930519H02Rik | 0.0000 | No |
| 7105 | 4930519L02Rik | 0.0000 | No |
| 7106 | 4930519P11Rik | 0.0000 | No |
| 7107 | 4930520M14Rik | 0.0000 | No |
| 7108 | 4930520O04Rik | 0.0000 | No |
| 7109 | 4930521E06Rik | 0.0000 | No |
| 7110 | 4930522L14Rik | 0.0000 | No |
| 7111 | 4930522N08Rik | 0.0000 | No |
| 7112 | 4930522O17Rik | 0.0000 | No |
| 7113 | 4930523C07Rik | 0.0000 | No |
| 7114 | 4930524B15Rik | 0.0000 | No |
| 7115 | 4930524B17Rik | 0.0000 | No |
| 7116 | 4930524J08Rik | 0.0000 | No |
| 7117 | 4930524N10Rik | 0.0000 | No |
| 7118 | 4930524O07Rik | 0.0000 | No |
| 7119 | 4930524O08Rik | 0.0000 | No |
| 7120 | 4930526A20Rik | 0.0000 | No |
| 7121 | 4930526F13Rik | 0.0000 | No |
| 7122 | 4930526L06Rik | 0.0000 | No |
| 7123 | 4930526M16Rik | 0.0000 | No |
| 7124 | 4930527A07Rik | 0.0000 | No |
| 7125 | 4930527B05Rik | 0.0000 | No |
| 7126 | 4930527E20Rik | 0.0000 | No |
| 7127 | 4930527J03Rik | 0.0000 | No |

|      |               |        |    |
|------|---------------|--------|----|
| 7128 | 4930528D03Rik | 0.0000 | No |
| 7129 | 4930528G23Rik | 0.0000 | No |
| 7130 | 4930528J11Rik | 0.0000 | No |
| 7131 | 4930529C04Rik | 0.0000 | No |
| 7132 | 4930529I22Rik | 0.0000 | No |
| 7133 | 4930532G15Rik | 0.0000 | No |
| 7134 | 4930532M18Rik | 0.0000 | No |
| 7135 | 4930533B01Rik | 0.0000 | No |
| 7136 | 4930533D04Rik | 0.0000 | No |
| 7137 | 4930533I22Rik | 0.0000 | No |
| 7138 | 4930533K18Rik | 0.0000 | No |
| 7139 | 4930533L02Rik | 0.0000 | No |
| 7140 | 4930533P14Rik | 0.0000 | No |
| 7141 | 4930534D22Rik | 0.0000 | No |
| 7142 | 4930535E02Rik | 0.0000 | No |
| 7143 | 4930535G08Rik | 0.0000 | No |
| 7144 | 4930535I16Rik | 0.0000 | No |
| 7145 | 4930535L15Rik | 0.0000 | No |
| 7146 | 4930535O05Rik | 0.0000 | No |
| 7147 | 4930537H20Rik | 0.0000 | No |
| 7148 | 4930538E20Rik | 0.0000 | No |
| 7149 | 4930538K18Rik | 0.0000 | No |
| 7150 | 4930539C22Rik | 0.0000 | No |
| 7151 | 4930539E08Rik | 0.0000 | No |
| 7152 | 4930539J05Rik | 0.0000 | No |
| 7153 | 4930539M17Rik | 0.0000 | No |
| 7154 | 4930540E01Rik | 0.0000 | No |
| 7155 | 4930540M05Rik | 0.0000 | No |
| 7156 | 4930542C12Rik | 0.0000 | No |
| 7157 | 4930542C16Rik | 0.0000 | No |
| 7158 | 4930543E12Rik | 0.0000 | No |
| 7159 | 4930544D05Rik | 0.0000 | No |
| 7160 | 4930544G11Rik | 0.0000 | No |
| 7161 | 4930544I03Rik | 0.0000 | No |
| 7162 | 4930544L04Rik | 0.0000 | No |
| 7163 | 4930544M13Rik | 0.0000 | No |
| 7164 | 4930545L23Rik | 0.0000 | No |
| 7165 | 4930546C10Rik | 0.0000 | No |
| 7166 | 4930547M16Rik | 0.0000 | No |
| 7167 | 4930548G14Rik | 0.0000 | No |
| 7168 | 4930548H24Rik | 0.0000 | No |
| 7169 | 4930548K13Rik | 0.0000 | No |
| 7170 | 4930550C14Rik | 0.0000 | No |
| 7171 | 4930550C17Rik | 0.0000 | No |
| 7172 | 4930550L24Rik | 0.0000 | No |
| 7173 | 4930551L18Rik | 0.0000 | No |

|      |               |        |    |
|------|---------------|--------|----|
| 7174 | 4930551O13Rik | 0.0000 | No |
| 7175 | 4930552N02Rik | 0.0000 | No |
| 7176 | 4930552P12Rik | 0.0000 | No |
| 7177 | 4930553I04Rik | 0.0000 | No |
| 7178 | 4930553M12Rik | 0.0000 | No |
| 7179 | 4930553P18Rik | 0.0000 | No |
| 7180 | 4930554C24Rik | 0.0000 | No |
| 7181 | 4930554G22Rik | 0.0000 | No |
| 7182 | 4930554G24Rik | 0.0000 | No |
| 7183 | 4930554H23Rik | 0.0000 | No |
| 7184 | 4930555A03Rik | 0.0000 | No |
| 7185 | 4930555B11Rik | 0.0000 | No |
| 7186 | 4930555B12Rik | 0.0000 | No |
| 7187 | 4930555F03Rik | 0.0000 | No |
| 7188 | 4930555G01Rik | 0.0000 | No |
| 7189 | 4930555K19Rik | 0.0000 | No |
| 7190 | 4930555M17Rik | 0.0000 | No |
| 7191 | 4930555O08Rik | 0.0000 | No |
| 7192 | 4930556G01Rik | 0.0000 | No |
| 7193 | 4930556G22Rik | 0.0000 | No |
| 7194 | 4930556I23Rik | 0.0000 | No |
| 7195 | 4930556J24Rik | 0.0000 | No |
| 7196 | 4930556L07Rik | 0.0000 | No |
| 7197 | 4930556M19Rik | 0.0000 | No |
| 7198 | 4930556N13Rik | 0.0000 | No |
| 7199 | 4930557F10Rik | 0.0000 | No |
| 7200 | 4930557J02Rik | 0.0000 | No |
| 7201 | 4930558C23Rik | 0.0000 | No |
| 7202 | 4930558F17Rik | 0.0000 | No |
| 7203 | 4930558G05Rik | 0.0000 | No |
| 7204 | 4930558J18Rik | 0.0000 | No |
| 7205 | 4930558J22Rik | 0.0000 | No |
| 7206 | 4930558K02Rik | 0.0000 | No |
| 7207 | 4930558N11Rik | 0.0000 | No |
| 7208 | 4930560O18Rik | 0.0000 | No |
| 7209 | 4930562A09Rik | 0.0000 | No |
| 7210 | 4930562C15Rik | 0.0000 | No |
| 7211 | 4930562D21Rik | 0.0000 | No |
| 7212 | 4930562F07Rik | 0.0000 | No |
| 7213 | 4930562F17Rik | 0.0000 | No |
| 7214 | 4930563E22Rik | 0.0000 | No |
| 7215 | 4930563F08Rik | 0.0000 | No |
| 7216 | 4930563H07Rik | 0.0000 | No |
| 7217 | 4930563I02Rik | 0.0000 | No |
| 7218 | 4930563M21Rik | 0.0000 | No |
| 7219 | 4930565N06Rik | 0.0000 | No |

|      |               |        |    |
|------|---------------|--------|----|
| 7220 | 4930566F21Rik | 0.0000 | No |
| 7221 | 4930567H17Rik | 0.0000 | No |
| 7222 | 4930568A12Rik | 0.0000 | No |
| 7223 | 4930568D16Rik | 0.0000 | No |
| 7224 | 4930568G15Rik | 0.0000 | No |
| 7225 | 4930569F06Rik | 0.0000 | No |
| 7226 | 4930570D08Rik | 0.0000 | No |
| 7227 | 4930570G19Rik | 0.0000 | No |
| 7228 | 4930570N18Rik | 0.0000 | No |
| 7229 | 4930572K03Rik | 0.0000 | No |
| 7230 | 4930572O03Rik | 0.0000 | No |
| 7231 | 4930573C15Rik | 0.0000 | No |
| 7232 | 4930573I07Rik | 0.0000 | No |
| 7233 | 4930577N17Rik | 0.0000 | No |
| 7234 | 4930578C19Rik | 0.0000 | No |
| 7235 | 4930578G10Rik | 0.0000 | No |
| 7236 | 4930578I06Rik | 0.0000 | No |
| 7237 | 4930578I07Rik | 0.0000 | No |
| 7238 | 4930579C12Rik | 0.0000 | No |
| 7239 | 4930579D09Rik | 0.0000 | No |
| 7240 | 4930579G18Rik | 0.0000 | No |
| 7241 | 4930579G24Rik | 0.0000 | No |
| 7242 | 4930579H20Rik | 0.0000 | No |
| 7243 | 4930579K19Rik | 0.0000 | No |
| 7244 | 4930579M01Rik | 0.0000 | No |
| 7245 | 4930579O11Rik | 0.0000 | No |
| 7246 | 4930580E04Rik | 0.0000 | No |
| 7247 | 4930581F22Rik | 0.0000 | No |
| 7248 | 4930583K01Rik | 0.0000 | No |
| 7249 | 4930583P06Rik | 0.0000 | No |
| 7250 | 4930588G17Rik | 0.0000 | No |
| 7251 | 4930588K23Rik | 0.0000 | No |
| 7252 | 4930589L23Rik | 0.0000 | No |
| 7253 | 4930589O11Rik | 0.0000 | No |
| 7254 | 4930589P08Rik | 0.0000 | No |
| 7255 | 4930590H14Rik | 0.0000 | No |
| 7256 | 4930590J08Rik | 0.0000 | No |
| 7257 | 4930590L14Rik | 0.0000 | No |
| 7258 | 4930590L20Rik | 0.0000 | No |
| 7259 | 4930591A17Rik | 0.0000 | No |
| 7260 | 4930593A02Rik | 0.0000 | No |
| 7261 | 4930593C16Rik | 0.0000 | No |
| 7262 | 4930594C11Rik | 0.0000 | No |
| 7263 | 4930594M17Rik | 0.0000 | No |
| 7264 | 4930594M22Rik | 0.0000 | No |
| 7265 | 4930594O21Rik | 0.0000 | No |

|      |               |        |    |
|------|---------------|--------|----|
| 7266 | 4930595D18Rik | 0.0000 | No |
| 7267 | 4930595M18Rik | 0.0000 | No |
| 7268 | 4930595O18Rik | 0.0000 | No |
| 7269 | 4930596D02Rik | 0.0000 | No |
| 7270 | 4930597A21Rik | 0.0000 | No |
| 7271 | 4930597L12Rik | 0.0000 | No |
| 7272 | 4930597O21Rik | 0.0000 | No |
| 7273 | 4930598F16Rik | 0.0000 | No |
| 7274 | 4930598N05Rik | 0.0000 | No |
| 7275 | 4930599A14Rik | 0.0000 | No |
| 7276 | 4930599N23Rik | 0.0000 | No |
| 7277 | 4930599N24Rik | 0.0000 | No |
| 7278 | 4931400O07Rik | 0.0000 | No |
| 7279 | 4931403E22Rik | 0.0000 | No |
| 7280 | 4931403G20Rik | 0.0000 | No |
| 7281 | 4931403M11Rik | 0.0000 | No |
| 7282 | 4931406B18Rik | 0.0000 | No |
| 7283 | 4931406C07Rik | 0.0000 | No |
| 7284 | 4931406G06Rik | 0.0000 | No |
| 7285 | 4931406P16Rik | 0.0000 | No |
| 7286 | 4931408C20Rik | 0.0000 | No |
| 7287 | 4931409K22Rik | 0.0000 | No |
| 7288 | 4931412I15Rik | 0.0000 | No |
| 7289 | 4931413I07Rik | 0.0000 | No |
| 7290 | 4931413K12Rik | 0.0000 | No |
| 7291 | 4931414P19Rik | 0.0000 | No |
| 7292 | 4931415C17Rik | 0.0000 | No |
| 7293 | 4931419H13Rik | 0.0000 | No |
| 7294 | 4931422A03Rik | 0.0000 | No |
| 7295 | 4931423N10Rik | 0.0000 | No |
| 7296 | 4931428F04Rik | 0.0000 | No |
| 7297 | 4931429L15Rik | 0.0000 | No |
| 7298 | 4931429P17Rik | 0.0000 | No |
| 7299 | 4931431C16Rik | 0.0000 | No |
| 7300 | 4931431F19Rik | 0.0000 | No |
| 7301 | 4931440F15Rik | 0.0000 | No |
| 7302 | 4931440J10Rik | 0.0000 | No |
| 7303 | 4931440P22Rik | 0.0000 | No |
| 7304 | 4932411E22Rik | 0.0000 | No |
| 7305 | 4932411K12Rik | 0.0000 | No |
| 7306 | 4932411N23Rik | 0.0000 | No |
| 7307 | 4932412D23Rik | 0.0000 | No |
| 7308 | 4932414J04Rik | 0.0000 | No |
| 7309 | 4932414N04Rik | 0.0000 | No |
| 7310 | 4932415D10Rik | 0.0000 | No |
| 7311 | 4932415M13Rik | 0.0000 | No |

|      |               |        |    |
|------|---------------|--------|----|
| 7312 | 4932416K20Rik | 0.0000 | No |
| 7313 | 4932429P05Rik | 0.0000 | No |
| 7314 | 4932430I15Rik | 0.0000 | No |
| 7315 | 4932431L22Rik | 0.0000 | No |
| 7316 | 4932431P20Rik | 0.0000 | No |
| 7317 | 4932435O22Rik | 0.0000 | No |
| 7318 | 4932438A13Rik | 0.0000 | No |
| 7319 | 4932438H23Rik | 0.0000 | No |
| 7320 | 4932441J04Rik | 0.0000 | No |
| 7321 | 4932442E05Rik | 0.0000 | No |
| 7322 | 4932443I19Rik | 0.0000 | No |
| 7323 | 4932443L11Rik | 0.0000 | No |
| 7324 | 4932702P03Rik | 0.0000 | No |
| 7325 | 4933400A11Rik | 0.0000 | No |
| 7326 | 4933400C23Rik | 0.0000 | No |
| 7327 | 4933400F21Rik | 0.0000 | No |
| 7328 | 4933400L20Rik | 0.0000 | No |
| 7329 | 4933401B06Rik | 0.0000 | No |
| 7330 | 4933401H06Rik | 0.0000 | No |
| 7331 | 4933402C05Rik | 0.0000 | No |
| 7332 | 4933402E13Rik | 0.0000 | No |
| 7333 | 4933402J07Rik | 0.0000 | No |
| 7334 | 4933402J10Rik | 0.0000 | No |
| 7335 | 4933402N22Rik | 0.0000 | No |
| 7336 | 4933402P03Rik | 0.0000 | No |
| 7337 | 4933404I11Rik | 0.0000 | No |
| 7338 | 4933404O12Rik | 0.0000 | No |
| 7339 | 4933405D12Rik | 0.0000 | No |
| 7340 | 4933405E24Rik | 0.0000 | No |
| 7341 | 4933405L10Rik | 0.0000 | No |
| 7342 | 4933405O20Rik | 0.0000 | No |
| 7343 | 4933406C10Rik | 0.0000 | No |
| 7344 | 4933406D12Rik | 0.0000 | No |
| 7345 | 4933406I18Rik | 0.0000 | No |
| 7346 | 4933406J10Rik | 0.0000 | No |
| 7347 | 4933406K04Rik | 0.0000 | No |
| 7348 | 4933406M09Rik | 0.0000 | No |
| 7349 | 4933406P04Rik | 0.0000 | No |
| 7350 | 4933407I08Rik | 0.0000 | No |
| 7351 | 4933407K13Rik | 0.0000 | No |
| 7352 | 4933407L21Rik | 0.0000 | No |
| 7353 | 4933408A14Rik | 0.0000 | No |
| 7354 | 4933408B17Rik | 0.0000 | No |
| 7355 | 4933408J17Rik | 0.0000 | No |
| 7356 | 4933408N05Rik | 0.0000 | No |
| 7357 | 4933409D19Rik | 0.0000 | No |



|      |               |        |    |
|------|---------------|--------|----|
| 7358 | 4933409G03Rik | 0.0000 | No |
| 7359 | 4933411E06Rik | 0.0000 | No |
| 7360 | 4933411G06Rik | 0.0000 | No |
| 7361 | 4933411K16Rik | 0.0000 | No |
| 7362 | 4933411O13Rik | 0.0000 | No |
| 7363 | 4933412A08Rik | 0.0000 | No |
| 7364 | 4933412E24Rik | 0.0000 | No |
| 7365 | 4933412L11Rik | 0.0000 | No |
| 7366 | 4933413C19Rik | 0.0000 | No |
| 7367 | 4933413G19Rik | 0.0000 | No |
| 7368 | 4933413J09Rik | 0.0000 | No |
| 7369 | 4933413L06Rik | 0.0000 | No |
| 7370 | 4933414I15Rik | 0.0000 | No |
| 7371 | 4933415A04Rik | 0.0000 | No |
| 7372 | 4933415F23Rik | 0.0000 | No |
| 7373 | 4933416C03Rik | 0.0000 | No |
| 7374 | 4933416E03Rik | 0.0000 | No |
| 7375 | 4933416I08Rik | 0.0000 | No |
| 7376 | 4933416M07Rik | 0.0000 | No |
| 7377 | 4933417A18Rik | 0.0000 | No |
| 7378 | 4933417C20Rik | 0.0000 | No |
| 7379 | 4933417D19Rik | 0.0000 | No |
| 7380 | 4933417G07Rik | 0.0000 | No |
| 7381 | 4933417O13Rik | 0.0000 | No |
| 7382 | 4933421A08Rik | 0.0000 | No |
| 7383 | 4933421D24Rik | 0.0000 | No |
| 7384 | 4933421I07Rik | 0.0000 | No |
| 7385 | 4933421O10Rik | 0.0000 | No |
| 7386 | 4933423L19Rik | 0.0000 | No |
| 7387 | 4933423P22Rik | 0.0000 | No |
| 7388 | 4933424G06Rik | 0.0000 | No |
| 7389 | 4933424H11Rik | 0.0000 | No |
| 7390 | 4933424L21Rik | 0.0000 | No |
| 7391 | 4933424M12Rik | 0.0000 | No |
| 7392 | 4933424N20Rik | 0.0000 | No |
| 7393 | 4933425L06Rik | 0.0000 | No |
| 7394 | 4933425M03Rik | 0.0000 | No |
| 7395 | 4933426K07Rik | 0.0000 | No |
| 7396 | 4933427D06Rik | 0.0000 | No |
| 7397 | 4933427D14Rik | 0.0000 | No |
| 7398 | 4933427E11Rik | 0.0000 | No |
| 7399 | 4933427E13Rik | 0.0000 | No |
| 7400 | 4933427G23Rik | 0.0000 | No |
| 7401 | 4933427I22Rik | 0.0000 | No |
| 7402 | 4933428G20Rik | 0.0000 | No |
| 7403 | 4933428M09Rik | 0.0000 | No |

|      |               |        |    |
|------|---------------|--------|----|
| 7404 | 4933428P19Rik | 0.0000 | No |
| 7405 | 4933429H19Rik | 0.0000 | No |
| 7406 | 4933430A20Rik | 0.0000 | No |
| 7407 | 4933430H06Rik | 0.0000 | No |
| 7408 | 4933430H16Rik | 0.0000 | No |
| 7409 | 4933430I17Rik | 0.0000 | No |
| 7410 | 4933430L12Rik | 0.0000 | No |
| 7411 | 4933430M04Rik | 0.0000 | No |
| 7412 | 4933430N04Rik | 0.0000 | No |
| 7413 | 4933431C10Rik | 0.0000 | No |
| 7414 | 4933431E20Rik | 0.0000 | No |
| 7415 | 4933431G14Rik | 0.0000 | No |
| 7416 | 4933431K14Rik | 0.0000 | No |
| 7417 | 4933431K23Rik | 0.0000 | No |
| 7418 | 4933431M02Rik | 0.0000 | No |
| 7419 | 4933432K03Rik | 0.0000 | No |
| 7420 | 4933433F19Rik | 0.0000 | No |
| 7421 | 4933433G15Rik | 0.0000 | No |
| 7422 | 4933434E20Rik | 0.0000 | No |
| 7423 | 4933435F18Rik | 0.0000 | No |
| 7424 | 4933435G04Rik | 0.0000 | No |
| 7425 | 4933436F18Rik | 0.0000 | No |
| 7426 | 4933436I01Rik | 0.0000 | No |
| 7427 | 4933436I20Rik | 0.0000 | No |
| 7428 | 4933437G19Rik | 0.0000 | No |
| 7429 | 4933438A12Rik | 0.0000 | No |
| 7430 | 4933438B17Rik | 0.0000 | No |
| 7431 | 4933438K21Rik | 0.0000 | No |
| 7432 | 4933439C10Rik | 0.0000 | No |
| 7433 | 4933439J24Rik | 0.0000 | No |
| 7434 | 4933439K11Rik | 0.0000 | No |
| 7435 | 4933439N06Rik | 0.0000 | No |
| 7436 | 4933440J02Rik | 0.0000 | No |
| 7437 | 4933440N22Rik | 0.0000 | No |
| 7438 | 5031410I06Rik | 0.0000 | No |
| 7439 | 5031415H12Rik | 0.0000 | No |
| 7440 | 5031425E22Rik | 0.0000 | No |
| 7441 | 5031434C07Rik | 0.0000 | No |
| 7442 | 5031434O11Rik | 0.0000 | No |
| 7443 | 5033403F01Rik | 0.0000 | No |
| 7444 | 5033403H07Rik | 0.0000 | No |
| 7445 | 5033404E19Rik | 0.0000 | No |
| 7446 | 5033417F24Rik | 0.0000 | No |
| 7447 | 5033426O07Rik | 0.0000 | No |
| 7448 | 5033430I15Rik | 0.0000 | No |
| 7449 | 5330406M23Rik | 0.0000 | No |

|      |               |        |    |
|------|---------------|--------|----|
| 7450 | 5330411J11Rik | 0.0000 | No |
| 7451 | 5330411O13Rik | 0.0000 | No |
| 7452 | 5330413D20Rik | 0.0000 | No |
| 7453 | 5330416C01Rik | 0.0000 | No |
| 7454 | 5330417C22Rik | 0.0000 | No |
| 7455 | 5330417H12Rik | 0.0000 | No |
| 7456 | 5330425B07Rik | 0.0000 | No |
| 7457 | 5330426L24Rik | 0.0000 | No |
| 7458 | 5330429C05Rik | 0.0000 | No |
| 7459 | 5330434G04Rik | 0.0000 | No |
| 7460 | 5330437M03Rik | 0.0000 | No |
| 7461 | 5330438D12Rik | 0.0000 | No |
| 7462 | 5330438I03Rik | 0.0000 | No |
| 7463 | 5330439A09Rik | 0.0000 | No |
| 7464 | 5330439K02Rik | 0.0000 | No |
| 7465 | 5430400D12Rik | 0.0000 | No |
| 7466 | 5430401F13Rik | 0.0000 | No |
| 7467 | 5430402E10Rik | 0.0000 | No |
| 7468 | 5430402O13Rik | 0.0000 | No |
| 7469 | 5430402P08Rik | 0.0000 | No |
| 7470 | 5430403G16Rik | 0.0000 | No |
| 7471 | 5430403N17Rik | 0.0000 | No |
| 7472 | 5430405H02Rik | 0.0000 | No |
| 7473 | 5430416N02Rik | 0.0000 | No |
| 7474 | 5430419D17Rik | 0.0000 | No |
| 7475 | 5430420F09Rik | 0.0000 | No |
| 7476 | 5430427M07Rik | 0.0000 | No |
| 7477 | 5430427N15Rik | 0.0000 | No |
| 7478 | 5430427O19Rik | 0.0000 | No |
| 7479 | 5430434F05Rik | 0.0000 | No |
| 7480 | 5430434I15Rik | 0.0000 | No |
| 7481 | 5530400C23Rik | 0.0000 | No |
| 7482 | 5530601H04Rik | 0.0000 | No |
| 7483 | 5730405O15Rik | 0.0000 | No |
| 7484 | 5730408A14Rik | 0.0000 | No |
| 7485 | 5730412P04Rik | 0.0000 | No |
| 7486 | 5730416F02Rik | 0.0000 | No |
| 7487 | 5730419F03Rik | 0.0000 | No |
| 7488 | 5730420D15Rik | 0.0000 | No |
| 7489 | 5730422E09Rik | 0.0000 | No |
| 7490 | 5730435O14Rik | 0.0000 | No |
| 7491 | 5730437C11Rik | 0.0000 | No |
| 7492 | 5730455P16Rik | 0.0000 | No |
| 7493 | 5730480H06Rik | 0.0000 | No |
| 7494 | 5730507A11Rik | 0.0000 | No |
| 7495 | 5730507C01Rik | 0.0000 | No |

|      |               |        |    |
|------|---------------|--------|----|
| 7496 | 5730522E02Rik | 0.0000 | No |
| 7497 | 5730585A16Rik | 0.0000 | No |
| 7498 | 5730596B20Rik | 0.0000 | No |
| 7499 | 5830405F06Rik | 0.0000 | No |
| 7500 | 5830411K02Rik | 0.0000 | No |
| 7501 | 5830416I19Rik | 0.0000 | No |
| 7502 | 5830417I10Rik | 0.0000 | No |
| 7503 | 5830418P13Rik | 0.0000 | No |
| 7504 | 5830437K03Rik | 0.0000 | No |
| 7505 | 5830444B04Rik | 0.0000 | No |
| 7506 | 5830444F18Rik | 0.0000 | No |
| 7507 | 5830454E08Rik | 0.0000 | No |
| 7508 | 5830462I19Rik | 0.0000 | No |
| 7509 | 5830473C10Rik | 0.0000 | No |
| 7510 | 5830487J09Rik | 0.0000 | No |
| 7511 | 5930403N24Rik | 0.0000 | No |
| 7512 | 5930409G06Rik | 0.0000 | No |
| 7513 | 5930412G12Rik | 0.0000 | No |
| 7514 | 5930420M18Rik | 0.0000 | No |
| 7515 | 5930422O12Rik | 0.0000 | No |
| 7516 | 5930435M05Rik | 0.0000 | No |
| 7517 | 6030407O03Rik | 0.0000 | No |
| 7518 | 6030408B16Rik | 0.0000 | No |
| 7519 | 6030419C18Rik | 0.0000 | No |
| 7520 | 6030442E23Rik | 0.0000 | No |
| 7521 | 6030442K20Rik | 0.0000 | No |
| 7522 | 6030443J06Rik | 0.0000 | No |
| 7523 | 6030445D17Rik | 0.0000 | No |
| 7524 | 6030452D12Rik | 0.0000 | No |
| 7525 | 6030458C11Rik | 0.0000 | No |
| 7526 | 6030460B20Rik | 0.0000 | No |
| 7527 | 6030468B19Rik | 0.0000 | No |
| 7528 | 6030469F06Rik | 0.0000 | No |
| 7529 | 6030471H07Rik | 0.0000 | No |
| 7530 | 6030498E09Rik | 0.0000 | No |
| 7531 | 6230400D17Rik | 0.0000 | No |
| 7532 | 6330403K07Rik | 0.0000 | No |
| 7533 | 6330403L08Rik | 0.0000 | No |
| 7534 | 6330403N20Rik | 0.0000 | No |
| 7535 | 6330408A02Rik | 0.0000 | No |
| 7536 | 6330409D20Rik | 0.0000 | No |
| 7537 | 6330410L21Rik | 0.0000 | No |
| 7538 | 6330411D24Rik | 0.0000 | No |
| 7539 | 6330415B21Rik | 0.0000 | No |
| 7540 | 6330418K02Rik | 0.0000 | No |
| 7541 | 6330420H09Rik | 0.0000 | No |

|      |               |        |    |
|------|---------------|--------|----|
| 7542 | 6330549D23Rik | 0.0000 | No |
| 7543 | 6330562C20Rik | 0.0000 | No |
| 7544 | 6430500D05Rik | 0.0000 | No |
| 7545 | 6430503K07Rik | 0.0000 | No |
| 7546 | 6430511E19Rik | 0.0000 | No |
| 7547 | 6430531B16Rik | 0.0000 | No |
| 7548 | 6430550D23Rik | 0.0000 | No |
| 7549 | 6430562O15Rik | 0.0000 | No |
| 7550 | 6430571L13Rik | 0.0000 | No |
| 7551 | 6430573F11Rik | 0.0000 | No |
| 7552 | 6430584L05Rik | 0.0000 | No |
| 7553 | 6430590A07Rik | 0.0000 | No |
| 7554 | 6430628N08Rik | 0.0000 | No |
| 7555 | 6430710C18Rik | 0.0000 | No |
| 7556 | 6430710M23Rik | 0.0000 | No |
| 7557 | 6530401F13Rik | 0.0000 | No |
| 7558 | 6530402F18Rik | 0.0000 | No |
| 7559 | 6530403H02Rik | 0.0000 | No |
| 7560 | 6530409C15Rik | 0.0000 | No |
| 7561 | 6530411M01Rik | 0.0000 | No |
| 7562 | 6530437J22Rik | 0.0000 | No |
| 7563 | 6720427I07Rik | 0.0000 | No |
| 7564 | 6720464F23Rik | 0.0000 | No |
| 7565 | 6720469O03Rik | 0.0000 | No |
| 7566 | 6720475M21Rik | 0.0000 | No |
| 7567 | 6720482G16Rik | 0.0000 | No |
| 7568 | 6720483E21Rik | 0.0000 | No |
| 7569 | 6720489N17Rik | 0.0000 | No |
| 7570 | 6820402A03Rik | 0.0000 | No |
| 7571 | 6820408C15Rik | 0.0000 | No |
| 7572 | 6820431F20Rik | 0.0000 | No |
| 7573 | 7330404K18Rik | 0.0000 | No |
| 7574 | 7330423F06Rik | 0.0000 | No |
| 7575 | 7420426K07Rik | 0.0000 | No |
| 7576 | 7420461P10Rik | 0.0000 | No |
| 7577 | 7530416G11Rik | 0.0000 | No |
| 7578 | 7630403G23Rik | 0.0000 | No |
| 7579 | 7SK           | 0.0000 | No |
| 7580 | 8030411F24Rik | 0.0000 | No |
| 7581 | 8030423F21Rik | 0.0000 | No |
| 7582 | 8030443G20Rik | 0.0000 | No |
| 7583 | 8030445P17Rik | 0.0000 | No |
| 7584 | 8030453O22Rik | 0.0000 | No |
| 7585 | 8030462N17Rik | 0.0000 | No |
| 7586 | 8030474K03Rik | 0.0000 | No |
| 7587 | 8030487O14Rik | 0.0000 | No |

|      |               |        |    |
|------|---------------|--------|----|
| 7588 | 8430408G22Rik | 0.0000 | No |
| 7589 | 8430419K02Rik | 0.0000 | No |
| 7590 | 8430422M14Rik | 0.0000 | No |
| 7591 | 8430423G03Rik | 0.0000 | No |
| 7592 | 8430429K09Rik | 0.0000 | No |
| 7593 | 8430432A02Rik | 0.0000 | No |
| 7594 | 9030204H09Rik | 0.0000 | No |
| 7595 | 9030407P20Rik | 0.0000 | No |
| 7596 | 9030612E09Rik | 0.0000 | No |
| 7597 | 9030616G12Rik | 0.0000 | No |
| 7598 | 9030617O03Rik | 0.0000 | No |
| 7599 | 9030624G23Rik | 0.0000 | No |
| 7600 | 9030624J02Rik | 0.0000 | No |
| 7601 | 9130008F23Rik | 0.0000 | No |
| 7602 | 9130011E15Rik | 0.0000 | No |
| 7603 | 9130015L21Rik | 0.0000 | No |
| 7604 | 9130017K11Rik | 0.0000 | No |
| 7605 | 9130019O22Rik | 0.0000 | No |
| 7606 | 9130019P16Rik | 0.0000 | No |
| 7607 | 9130023H24Rik | 0.0000 | No |
| 7608 | 9130024F11Rik | 0.0000 | No |
| 7609 | 9130204L05Rik | 0.0000 | No |
| 7610 | 9130208D14Rik | 0.0000 | No |
| 7611 | 9130221F21Rik | 0.0000 | No |
| 7612 | 9130221H12Rik | 0.0000 | No |
| 7613 | 9130227L01Rik | 0.0000 | No |
| 7614 | 9130230L23Rik | 0.0000 | No |
| 7615 | 9130230N09Rik | 0.0000 | No |
| 7616 | 9130401M01Rik | 0.0000 | No |
| 7617 | 9130409I23Rik | 0.0000 | No |
| 7618 | 9130410C08Rik | 0.0000 | No |
| 7619 | 9130604C24Rik | 0.0000 | No |
| 7620 | 9230009I02Rik | 0.0000 | No |
| 7621 | 9230104L09Rik | 0.0000 | No |
| 7622 | 9230104M06Rik | 0.0000 | No |
| 7623 | 9230106D20Rik | 0.0000 | No |
| 7624 | 9230110C19Rik | 0.0000 | No |
| 7625 | 9230110F15Rik | 0.0000 | No |
| 7626 | 9230111E07Rik | 0.0000 | No |
| 7627 | 9230112D13Rik | 0.0000 | No |
| 7628 | 9230114J08Rik | 0.0000 | No |
| 7629 | 9230114K14Rik | 0.0000 | No |
| 7630 | 9230116N13Rik | 0.0000 | No |
| 7631 | 9230117E06Rik | 0.0000 | No |
| 7632 | 9330020H09Rik | 0.0000 | No |
| 7633 | 9330102E08Rik | 0.0000 | No |

|      |               |        |    |
|------|---------------|--------|----|
| 7634 | 9330104G04Rik | 0.0000 | No |
| 7635 | 9330111N05Rik | 0.0000 | No |
| 7636 | 9330118I20Rik | 0.0000 | No |
| 7637 | 9330121J05Rik | 0.0000 | No |
| 7638 | 9330136K24Rik | 0.0000 | No |
| 7639 | 9330151L19Rik | 0.0000 | No |
| 7640 | 9330154J02Rik | 0.0000 | No |
| 7641 | 9330154K18Rik | 0.0000 | No |
| 7642 | 9330158H04Rik | 0.0000 | No |
| 7643 | 9330159F19Rik | 0.0000 | No |
| 7644 | 9330159M07Rik | 0.0000 | No |
| 7645 | 9330160F10Rik | 0.0000 | No |
| 7646 | 9330161L09Rik | 0.0000 | No |
| 7647 | 9330162012Rik | 0.0000 | No |
| 7648 | 9330162B11Rik | 0.0000 | No |
| 7649 | 9330162G02Rik | 0.0000 | No |
| 7650 | 9330171B17Rik | 0.0000 | No |
| 7651 | 9330175E14Rik | 0.0000 | No |
| 7652 | 9330175M20Rik | 0.0000 | No |
| 7653 | 9330178D15Rik | 0.0000 | No |
| 7654 | 9330179D12Rik | 0.0000 | No |
| 7655 | 9330182L06Rik | 0.0000 | No |
| 7656 | 9330182O14Rik | 0.0000 | No |
| 7657 | 9330185C12Rik | 0.0000 | No |
| 7658 | 9330198N18Rik | 0.0000 | No |
| 7659 | 9430007A20Rik | 0.0000 | No |
| 7660 | 9430007M09Rik | 0.0000 | No |
| 7661 | 9430015G10Rik | 0.0000 | No |
| 7662 | 9430016H08Rik | 0.0000 | No |
| 7663 | 9430018G01Rik | 0.0000 | No |
| 7664 | 9430020K01Rik | 0.0000 | No |
| 7665 | 9430021M05Rik | 0.0000 | No |
| 7666 | 9430024E24Rik | 0.0000 | No |
| 7667 | 9430025C20Rik | 0.0000 | No |
| 7668 | 9430034N14Rik | 0.0000 | No |
| 7669 | 9430037O13Rik | 0.0000 | No |
| 7670 | 9430038I01Rik | 0.0000 | No |
| 7671 | 9430041J12Rik | 0.0000 | No |
| 7672 | 9430053O09Rik | 0.0000 | No |
| 7673 | 9430060I03Rik | 0.0000 | No |
| 7674 | 9430062P05Rik | 0.0000 | No |
| 7675 | 9430064I24Rik | 0.0000 | No |
| 7676 | 9430065F17Rik | 0.0000 | No |
| 7677 | 9430073C21Rik | 0.0000 | No |
| 7678 | 9430076C15Rik | 0.0000 | No |
| 7679 | 9430083B18Rik | 0.0000 | No |

|      |               |        |    |
|------|---------------|--------|----|
| 7680 | 9430087B13Rik | 0.0000 | No |
| 7681 | 9430087J23Rik | 0.0000 | No |
| 7682 | 9430091E24Rik | 0.0000 | No |
| 7683 | 9430092D12Rik | 0.0000 | No |
| 7684 | 9430093N23Rik | 0.0000 | No |
| 7685 | 9430097D07Rik | 0.0000 | No |
| 7686 | 9430098F02Rik | 0.0000 | No |
| 7687 | 9430099M06Rik | 0.0000 | No |
| 7688 | 9530003J23Rik | 0.0000 | No |
| 7689 | 9530003O04Rik | 0.0000 | No |
| 7690 | 9530018H14Rik | 0.0000 | No |
| 7691 | 9530022L04Rik | 0.0000 | No |
| 7692 | 9530027J09Rik | 0.0000 | No |
| 7693 | 9530034A14Rik | 0.0000 | No |
| 7694 | 9530034E10Rik | 0.0000 | No |
| 7695 | 9530036M11Rik | 0.0000 | No |
| 7696 | 9530036O11Rik | 0.0000 | No |
| 7697 | 9530046B11Rik | 0.0000 | No |
| 7698 | 9530051G07Rik | 0.0000 | No |
| 7699 | 9530052C20Rik | 0.0000 | No |
| 7700 | 9530052E02Rik | 0.0000 | No |
| 7701 | 9530053A07Rik | 0.0000 | No |
| 7702 | 9530062K07Rik | 0.0000 | No |
| 7703 | 9530068E07Rik | 0.0000 | No |
| 7704 | 9530077C05Rik | 0.0000 | No |
| 7705 | 9530078K11Rik | 0.0000 | No |
| 7706 | 9530080O11Rik | 0.0000 | No |
| 7707 | 9530082P21Rik | 0.0000 | No |
| 7708 | 9530085L11Rik | 0.0000 | No |
| 7709 | 9530085P06Rik | 0.0000 | No |
| 7710 | 9530086O07Rik | 0.0000 | No |
| 7711 | 9530097N15Rik | 0.0000 | No |
| 7712 | 9630001P10Rik | 0.0000 | No |
| 7713 | 9630010A21Rik | 0.0000 | No |
| 7714 | 9630013D21Rik | 0.0000 | No |
| 7715 | 9630013K17Rik | 0.0000 | No |
| 7716 | 9630028B13Rik | 0.0000 | No |
| 7717 | 9630041A04Rik | 0.0000 | No |
| 7718 | 9830004L10Rik | 0.0000 | No |
| 7719 | 9830107B12Rik | 0.0000 | No |
| 7720 | 9830132P13Rik | 0.0000 | No |
| 7721 | 9830144P21Rik | 0.0000 | No |
| 7722 | 9930004E17Rik | 0.0000 | No |
| 7723 | 9930012K11Rik | 0.0000 | No |
| 7724 | 9930014A18Rik | 0.0000 | No |
| 7725 | 9930021J03Rik | 0.0000 | No |



|      |                |        |    |
|------|----------------|--------|----|
| 7726 | 9930022D16Rik  | 0.0000 | No |
| 7727 | 9930038B18Rik  | 0.0000 | No |
| 7728 | 9930104L06Rik  | 0.0000 | No |
| 7729 | 9930111H07Rik  | 0.0000 | No |
| 7730 | 9930111J21Rik1 | 0.0000 | No |
| 7731 | 9930111J21Rik2 | 0.0000 | No |
| 7732 | 9930120I10Rik  | 0.0000 | No |
| 7733 | a              | 0.0000 | No |
| 7734 | A030001D20Rik  | 0.0000 | No |
| 7735 | A030012G06Rik  | 0.0000 | No |
| 7736 | A130006I12Rik  | 0.0000 | No |
| 7737 | A130010J15Rik  | 0.0000 | No |
| 7738 | A130014A01Rik  | 0.0000 | No |
| 7739 | A130023I24Rik  | 0.0000 | No |
| 7740 | A130030D18Rik  | 0.0000 | No |
| 7741 | A130048G24Rik  | 0.0000 | No |
| 7742 | A130050O07Rik  | 0.0000 | No |
| 7743 | A130051J06Rik  | 0.0000 | No |
| 7744 | A130071D04Rik  | 0.0000 | No |
| 7745 | A1bg           | 0.0000 | No |
| 7746 | A1cf           | 0.0000 | No |
| 7747 | A230001M10Rik  | 0.0000 | No |
| 7748 | A230004M16Rik  | 0.0000 | No |
| 7749 | A230006K03Rik  | 0.0000 | No |
| 7750 | A230009B12Rik  | 0.0000 | No |
| 7751 | A230020J21Rik  | 0.0000 | No |
| 7752 | A230046K03Rik  | 0.0000 | No |
| 7753 | A230050P20Rik  | 0.0000 | No |
| 7754 | A230056P14Rik  | 0.0000 | No |
| 7755 | A230059L01Rik  | 0.0000 | No |
| 7756 | A230060F14Rik  | 0.0000 | No |
| 7757 | A230072C01Rik  | 0.0000 | No |
| 7758 | A230072E10Rik  | 0.0000 | No |
| 7759 | A230072I06Rik  | 0.0000 | No |
| 7760 | A230077H06Rik  | 0.0000 | No |
| 7761 | A230083G16Rik  | 0.0000 | No |
| 7762 | A230083N12Rik  | 0.0000 | No |
| 7763 | A230085B16Rik  | 0.0000 | No |
| 7764 | A230087F16Rik  | 0.0000 | No |
| 7765 | A230103J11Rik  | 0.0000 | No |
| 7766 | A230103L15Rik  | 0.0000 | No |
| 7767 | A230107N01Rik  | 0.0000 | No |
| 7768 | A230108P19Rik  | 0.0000 | No |
| 7769 | A26c2          | 0.0000 | No |
| 7770 | A2m            | 0.0000 | No |
| 7771 | A330008L17Rik  | 0.0000 | No |

|      |               |        |    |
|------|---------------|--------|----|
| 7772 | A330009N23Rik | 0.0000 | No |
| 7773 | A330015K06Rik | 0.0000 | No |
| 7774 | A330023F24Rik | 0.0000 | No |
| 7775 | A330032B11Rik | 0.0000 | No |
| 7776 | A330033J07Rik | 0.0000 | No |
| 7777 | A330035P11Rik | 0.0000 | No |
| 7778 | A330040F15Rik | 0.0000 | No |
| 7779 | A330041J22Rik | 0.0000 | No |
| 7780 | A330043C09Rik | 0.0000 | No |
| 7781 | A330048O09Rik | 0.0000 | No |
| 7782 | A330058E17Rik | 0.0000 | No |
| 7783 | A330069K06Rik | 0.0000 | No |
| 7784 | A330074H02Rik | 0.0000 | No |
| 7785 | A330074K22Rik | 0.0000 | No |
| 7786 | A330076H08Rik | 0.0000 | No |
| 7787 | A330093E20Rik | 0.0000 | No |
| 7788 | A330094K24Rik | 0.0000 | No |
| 7789 | A330102I10Rik | 0.0000 | No |
| 7790 | A3galt2       | 0.0000 | No |
| 7791 | A430005L14Rik | 0.0000 | No |
| 7792 | A430010J10Rik | 0.0000 | No |
| 7793 | A430027C01Rik | 0.0000 | No |
| 7794 | A430027H14Rik | 0.0000 | No |
| 7795 | A430033K04Rik | 0.0000 | No |
| 7796 | A430034D21Rik | 0.0000 | No |
| 7797 | A430035B10Rik | 0.0000 | No |
| 7798 | A430046D13Rik | 0.0000 | No |
| 7799 | A430048G15Rik | 0.0000 | No |
| 7800 | A430050A11Rik | 0.0000 | No |
| 7801 | A430057M04Rik | 0.0000 | No |
| 7802 | A430060F13Rik | 0.0000 | No |
| 7803 | A430072C10Rik | 0.0000 | No |
| 7804 | A430072P03Rik | 0.0000 | No |
| 7805 | A430073D23Rik | 0.0000 | No |
| 7806 | A430078G23Rik | 0.0000 | No |
| 7807 | A430078I02Rik | 0.0000 | No |
| 7808 | A430089I19Rik | 0.0000 | No |
| 7809 | A430105I19Rik | 0.0000 | No |
| 7810 | A430105J06Rik | 0.0000 | No |
| 7811 | A430106G13Rik | 0.0000 | No |
| 7812 | A430108G06Rik | 0.0000 | No |
| 7813 | A430110C17Rik | 0.0000 | No |
| 7814 | A430110L20Rik | 0.0000 | No |
| 7815 | A4gnt         | 0.0000 | No |
| 7816 | A530006G24Rik | 0.0000 | No |
| 7817 | A530013C23Rik | 0.0000 | No |

|      |               |        |    |
|------|---------------|--------|----|
| 7818 | A530016L24Rik | 0.0000 | No |
| 7819 | A530017D24Rik | 0.0000 | No |
| 7820 | A530020G20Rik | 0.0000 | No |
| 7821 | A530040E14Rik | 0.0000 | No |
| 7822 | A530041M06Rik | 0.0000 | No |
| 7823 | A530053G22Rik | 0.0000 | No |
| 7824 | A530053M12Rik | 0.0000 | No |
| 7825 | A530058N18Rik | 0.0000 | No |
| 7826 | A530064D06Rik | 0.0000 | No |
| 7827 | A530064N14Rik | 0.0000 | No |
| 7828 | A530072M11Rik | 0.0000 | No |
| 7829 | A530076I17Rik | 0.0000 | No |
| 7830 | A530083I20Rik | 0.0000 | No |
| 7831 | A530083M17Rik | 0.0000 | No |
| 7832 | A530095I07Rik | 0.0000 | No |
| 7833 | A530099J19Rik | 0.0000 | No |
| 7834 | A630001G21Rik | 0.0000 | No |
| 7835 | A630010A05Rik | 0.0000 | No |
| 7836 | A630012P03Rik | 0.0000 | No |
| 7837 | A630014C17Rik | 0.0000 | No |
| 7838 | A630023A22Rik | 0.0000 | No |
| 7839 | A630023P12Rik | 0.0000 | No |
| 7840 | A630031M04Rik | 0.0000 | No |
| 7841 | A630033H20Rik | 0.0000 | No |
| 7842 | A630035G10Rik | 0.0000 | No |
| 7843 | A630050E04Rik | 0.0000 | No |
| 7844 | A630052C17Rik | 0.0000 | No |
| 7845 | A630072L19Rik | 0.0000 | No |
| 7846 | A630072M18Rik | 0.0000 | No |
| 7847 | A630073D07Rik | 0.0000 | No |
| 7848 | A630075F10Rik | 0.0000 | No |
| 7849 | A630076J17Rik | 0.0000 | No |
| 7850 | A630081D01Rik | 0.0000 | No |
| 7851 | A630095E13Rik | 0.0000 | No |
| 7852 | A630095N17Rik | 0.0000 | No |
| 7853 | A730004F24Rik | 0.0000 | No |
| 7854 | A730011C13Rik | 0.0000 | No |
| 7855 | A730013G03Rik | 0.0000 | No |
| 7856 | A730015C16Rik | 0.0000 | No |
| 7857 | A730017C20Rik | 0.0000 | No |
| 7858 | A730017L22Rik | 0.0000 | No |
| 7859 | A730018C14Rik | 0.0000 | No |
| 7860 | A730020E08Rik | 0.0000 | No |
| 7861 | A730020M07Rik | 0.0000 | No |
| 7862 | A730036I17Rik | 0.0000 | No |
| 7863 | A730045E13Rik | 0.0000 | No |

|      |               |        |    |
|------|---------------|--------|----|
| 7864 | A730056A06Rik | 0.0000 | No |
| 7865 | A730060N03Rik | 0.0000 | No |
| 7866 | A730061H03Rik | 0.0000 | No |
| 7867 | A730062M13Rik | 0.0000 | No |
| 7868 | A730071L15Rik | 0.0000 | No |
| 7869 | A730081D07Rik | 0.0000 | No |
| 7870 | A730085K08Rik | 0.0000 | No |
| 7871 | A730089K16Rik | 0.0000 | No |
| 7872 | A730090N16Rik | 0.0000 | No |
| 7873 | A730094K22Rik | 0.0000 | No |
| 7874 | A730098A19Rik | 0.0000 | No |
| 7875 | A830005F24Rik | 0.0000 | No |
| 7876 | A830008E24Rik | 0.0000 | No |
| 7877 | A830010M20Rik | 0.0000 | No |
| 7878 | A830011K09Rik | 0.0000 | No |
| 7879 | A830012C17Rik | 0.0000 | No |
| 7880 | A830018L16Rik | 0.0000 | No |
| 7881 | A830019L24Rik | 0.0000 | No |
| 7882 | A830019P07Rik | 0.0000 | No |
| 7883 | A830029E22Rik | 0.0000 | No |
| 7884 | A830031A19Rik | 0.0000 | No |
| 7885 | A830035A12Rik | 0.0000 | No |
| 7886 | A830036E02Rik | 0.0000 | No |
| 7887 | A830039N20Rik | 0.0000 | No |
| 7888 | A830052D11Rik | 0.0000 | No |
| 7889 | A830073O21Rik | 0.0000 | No |
| 7890 | A830080D01Rik | 0.0000 | No |
| 7891 | A830082K12Rik | 0.0000 | No |
| 7892 | A830092H15Rik | 0.0000 | No |
| 7893 | A930001A20Rik | 0.0000 | No |
| 7894 | A930001C03Rik | 0.0000 | No |
| 7895 | A930002H02Rik | 0.0000 | No |
| 7896 | A930003A15Rik | 0.0000 | No |
| 7897 | A930003O13Rik | 0.0000 | No |
| 7898 | A930004D18Rik | 0.0000 | No |
| 7899 | A930004J17Rik | 0.0000 | No |
| 7900 | A930005H10Rik | 0.0000 | No |
| 7901 | A930005N03Rik | 0.0000 | No |
| 7902 | A930006K02Rik | 0.0000 | No |
| 7903 | A930006L05Rik | 0.0000 | No |
| 7904 | A930007I19Rik | 0.0000 | No |
| 7905 | A930009A15Rik | 0.0000 | No |
| 7906 | A930011G23Rik | 0.0000 | No |
| 7907 | A930012L18Rik | 0.0000 | No |
| 7908 | A930012O16Rik | 0.0000 | No |
| 7909 | A930014E01Rik | 0.0000 | No |

|      |               |        |    |
|------|---------------|--------|----|
| 7910 | A930014E10Rik | 0.0000 | No |
| 7911 | A930015D03Rik | 0.0000 | No |
| 7912 | A930016O22Rik | 0.0000 | No |
| 7913 | A930017K11Rik | 0.0000 | No |
| 7914 | A930017M01Rik | 0.0000 | No |
| 7915 | A930018M24Rik | 0.0000 | No |
| 7916 | A930019D19Rik | 0.0000 | No |
| 7917 | A930024E05Rik | 0.0000 | No |
| 7918 | A930024N18Rik | 0.0000 | No |
| 7919 | A930029G22Rik | 0.0000 | No |
| 7920 | A930030B08Rik | 0.0000 | No |
| 7921 | A930031H19Rik | 0.0000 | No |
| 7922 | A930032L01Rik | 0.0000 | No |
| 7923 | A930033H14Rik | 0.0000 | No |
| 7924 | A930036K24Rik | 0.0000 | No |
| 7925 | A930038B10Rik | 0.0000 | No |
| 7926 | A930041C12Rik | 0.0000 | No |
| 7927 | A930104D05Rik | 0.0000 | No |
| 7928 | AA066038      | 0.0000 | No |
| 7929 | AA386476      | 0.0000 | No |
| 7930 | AA387200      | 0.0000 | No |
| 7931 | AA413626      | 0.0000 | No |
| 7932 | AA414768      | 0.0000 | No |
| 7933 | AA415398      | 0.0000 | No |
| 7934 | AA465934      | 0.0000 | No |
| 7935 | AA467197      | 0.0000 | No |
| 7936 | AA474408      | 0.0000 | No |
| 7937 | AA543186      | 0.0000 | No |
| 7938 | AA543401      | 0.0000 | No |
| 7939 | AA545190      | 0.0000 | No |
| 7940 | AA619741      | 0.0000 | No |
| 7941 | AA623943      | 0.0000 | No |
| 7942 | AA645442      | 0.0000 | No |
| 7943 | AA672651      | 0.0000 | No |
| 7944 | AA792892      | 0.0000 | No |
| 7945 | AA914427      | 0.0000 | No |
| 7946 | AA986860      | 0.0000 | No |
| 7947 | Aaas          | 0.0000 | No |
| 7948 | Aacs          | 0.0000 | No |
| 7949 | Aadac         | 0.0000 | No |
| 7950 | Aadacl2       | 0.0000 | No |
| 7951 | Aadat         | 0.0000 | No |
| 7952 | Aaed1         | 0.0000 | No |
| 7953 | Aagab         | 0.0000 | No |
| 7954 | Aamdc         | 0.0000 | No |
| 7955 | Aamp          | 0.0000 | No |

|      |          |        |    |
|------|----------|--------|----|
| 7956 | Aar2     | 0.0000 | No |
| 7957 | Aard     | 0.0000 | No |
| 7958 | Aars     | 0.0000 | No |
| 7959 | Aars2    | 0.0000 | No |
| 7960 | Aarsd1   | 0.0000 | No |
| 7961 | Aasdh    | 0.0000 | No |
| 7962 | Aasdhppt | 0.0000 | No |
| 7963 | Aass     | 0.0000 | No |
| 7964 | Aatf     | 0.0000 | No |
| 7965 | AB041806 | 0.0000 | No |
| 7966 | AB124611 | 0.0000 | No |
| 7967 | Abat     | 0.0000 | No |
| 7968 | Abca1    | 0.0000 | No |
| 7969 | Abca12   | 0.0000 | No |
| 7970 | Abca13   | 0.0000 | No |
| 7971 | Abca14   | 0.0000 | No |
| 7972 | Abca15   | 0.0000 | No |
| 7973 | Abca16   | 0.0000 | No |
| 7974 | Abca17   | 0.0000 | No |
| 7975 | Abca3    | 0.0000 | No |
| 7976 | Abca4    | 0.0000 | No |
| 7977 | Abca5    | 0.0000 | No |
| 7978 | Abca6    | 0.0000 | No |
| 7979 | Abca7    | 0.0000 | No |
| 7980 | Abca8a   | 0.0000 | No |
| 7981 | Abca8b   | 0.0000 | No |
| 7982 | Abca9    | 0.0000 | No |
| 7983 | Abcb11   | 0.0000 | No |
| 7984 | Abcb1a   | 0.0000 | No |
| 7985 | Abcb1b   | 0.0000 | No |
| 7986 | Abcb4    | 0.0000 | No |
| 7987 | Abcb5    | 0.0000 | No |
| 7988 | Abcb6    | 0.0000 | No |
| 7989 | Abcb7    | 0.0000 | No |
| 7990 | Abcb8    | 0.0000 | No |
| 7991 | Abcc1    | 0.0000 | No |
| 7992 | Abcc10   | 0.0000 | No |
| 7993 | Abcc12   | 0.0000 | No |
| 7994 | Abcc2    | 0.0000 | No |
| 7995 | Abcc3    | 0.0000 | No |
| 7996 | Abcc4    | 0.0000 | No |
| 7997 | Abcc5    | 0.0000 | No |
| 7998 | Abcc6    | 0.0000 | No |
| 7999 | Abcc8    | 0.0000 | No |
| 8000 | Abcc9    | 0.0000 | No |
| 8001 | Abcd1    | 0.0000 | No |

|      |            |        |    |
|------|------------|--------|----|
| 8002 | Abcd2      | 0.0000 | No |
| 8003 | Abcd3      | 0.0000 | No |
| 8004 | Abcd4      | 0.0000 | No |
| 8005 | Abce1      | 0.0000 | No |
| 8006 | Abcf1      | 0.0000 | No |
| 8007 | Abcf2      | 0.0000 | No |
| 8008 | Abcf3      | 0.0000 | No |
| 8009 | Abcg1      | 0.0000 | No |
| 8010 | Abcg2      | 0.0000 | No |
| 8011 | Abcg3      | 0.0000 | No |
| 8012 | Abcg4      | 0.0000 | No |
| 8013 | Abcg5      | 0.0000 | No |
| 8014 | Abcg8      | 0.0000 | No |
| 8015 | Abhd1      | 0.0000 | No |
| 8016 | Abhd10     | 0.0000 | No |
| 8017 | Abhd11     | 0.0000 | No |
| 8018 | Abhd12     | 0.0000 | No |
| 8019 | Abhd12b    | 0.0000 | No |
| 8020 | Abhd13     | 0.0000 | No |
| 8021 | Abhd14a    | 0.0000 | No |
| 8022 | Abhd14b    | 0.0000 | No |
| 8023 | Abhd15     | 0.0000 | No |
| 8024 | Abhd16a    | 0.0000 | No |
| 8025 | Abhd16b    | 0.0000 | No |
| 8026 | Abhd17a    | 0.0000 | No |
| 8027 | Abhd17b    | 0.0000 | No |
| 8028 | Abhd17c    | 0.0000 | No |
| 8029 | Abhd18     | 0.0000 | No |
| 8030 | Abhd2      | 0.0000 | No |
| 8031 | Abhd3      | 0.0000 | No |
| 8032 | Abhd4      | 0.0000 | No |
| 8033 | Abhd5      | 0.0000 | No |
| 8034 | Abhd6      | 0.0000 | No |
| 8035 | Abi1       | 0.0000 | No |
| 8036 | Abi2       | 0.0000 | No |
| 8037 | Abi3       | 0.0000 | No |
| 8038 | Ab11       | 0.0000 | No |
| 8039 | Ab12       | 0.0000 | No |
| 8040 | Ab1im2     | 0.0000 | No |
| 8041 | Ab1im3     | 0.0000 | No |
| 8042 | Abr        | 0.0000 | No |
| 8043 | Abra       | 0.0000 | No |
| 8044 | Abracl     | 0.0000 | No |
| 8045 | Abt1       | 0.0000 | No |
| 8046 | Abtb1      | 0.0000 | No |
| 8047 | AC069308.1 | 0.0000 | No |

|      |            |        |    |
|------|------------|--------|----|
| 8048 | AC084391.1 | 0.0000 | No |
| 8049 | AC084822.1 | 0.0000 | No |
| 8050 | AC087064.1 | 0.0000 | No |
| 8051 | AC087559.1 | 0.0000 | No |
| 8052 | AC087559.2 | 0.0000 | No |
| 8053 | AC087559.3 | 0.0000 | No |
| 8054 | AC099760.1 | 0.0000 | No |
| 8055 | AC099934.1 | 0.0000 | No |
| 8056 | AC099934.2 | 0.0000 | No |
| 8057 | AC102264.1 | 0.0000 | No |
| 8058 | AC109138.1 | 0.0000 | No |
| 8059 | AC109138.3 | 0.0000 | No |
| 8060 | AC109138.4 | 0.0000 | No |
| 8061 | AC109138.5 | 0.0000 | No |
| 8062 | AC109138.6 | 0.0000 | No |
| 8063 | AC110514.1 | 0.0000 | No |
| 8064 | AC110514.2 | 0.0000 | No |
| 8065 | AC114603.1 | 0.0000 | No |
| 8066 | AC117188.1 | 0.0000 | No |
| 8067 | AC117232.1 | 0.0000 | No |
| 8068 | AC117240.1 | 0.0000 | No |
| 8069 | AC117622.1 | 0.0000 | No |
| 8070 | AC117622.2 | 0.0000 | No |
| 8071 | AC118542.1 | 0.0000 | No |
| 8072 | AC119928.1 | 0.0000 | No |
| 8073 | AC121298.1 | 0.0000 | No |
| 8074 | AC121821.1 | 0.0000 | No |
| 8075 | AC121905.1 | 0.0000 | No |
| 8076 | AC122546.1 | 0.0000 | No |
| 8077 | AC122844.1 | 0.0000 | No |
| 8078 | AC123873.1 | 0.0000 | No |
| 8079 | AC123873.2 | 0.0000 | No |
| 8080 | AC123873.3 | 0.0000 | No |
| 8081 | AC124193.1 | 0.0000 | No |
| 8082 | AC124394.1 | 0.0000 | No |
| 8083 | AC124394.2 | 0.0000 | No |
| 8084 | AC124394.3 | 0.0000 | No |
| 8085 | AC124394.4 | 0.0000 | No |
| 8086 | AC124457.1 | 0.0000 | No |
| 8087 | AC124606.1 | 0.0000 | No |
| 8088 | AC124606.2 | 0.0000 | No |
| 8089 | AC124613.1 | 0.0000 | No |
| 8090 | AC125099.1 | 0.0000 | No |
| 8091 | AC125099.2 | 0.0000 | No |
| 8092 | AC125149.1 | 0.0000 | No |
| 8093 | AC125149.2 | 0.0000 | No |



|      |             |        |    |
|------|-------------|--------|----|
| 8094 | AC125149.3  | 0.0000 | No |
| 8095 | AC125149.4  | 0.0000 | No |
| 8096 | AC125149.5  | 0.0000 | No |
| 8097 | AC125167.1  | 0.0000 | No |
| 8098 | AC125178.1  | 0.0000 | No |
| 8099 | AC125178.2  | 0.0000 | No |
| 8100 | AC125178.3  | 0.0000 | No |
| 8101 | AC126035.1  | 0.0000 | No |
| 8102 | AC127556.10 | 0.0000 | No |
| 8103 | AC127556.5  | 0.0000 | No |
| 8104 | AC130211.1  | 0.0000 | No |
| 8105 | AC132444.1  | 0.0000 | No |
| 8106 | AC132444.2  | 0.0000 | No |
| 8107 | AC132444.3  | 0.0000 | No |
| 8108 | AC132444.4  | 0.0000 | No |
| 8109 | AC132444.6  | 0.0000 | No |
| 8110 | AC133095.1  | 0.0000 | No |
| 8111 | AC133095.2  | 0.0000 | No |
| 8112 | AC133103.1  | 0.0000 | No |
| 8113 | AC133103.2  | 0.0000 | No |
| 8114 | AC133103.3  | 0.0000 | No |
| 8115 | AC133103.4  | 0.0000 | No |
| 8116 | AC133103.5  | 0.0000 | No |
| 8117 | AC133103.7  | 0.0000 | No |
| 8118 | AC133189.1  | 0.0000 | No |
| 8119 | AC136146.1  | 0.0000 | No |
| 8120 | AC137605.1  | 0.0000 | No |
| 8121 | AC137678.1  | 0.0000 | No |
| 8122 | AC139186.1  | 0.0000 | No |
| 8123 | AC139209.1  | 0.0000 | No |
| 8124 | AC139209.2  | 0.0000 | No |
| 8125 | AC139209.3  | 0.0000 | No |
| 8126 | AC140205.10 | 0.0000 | No |
| 8127 | AC140325.1  | 0.0000 | No |
| 8128 | AC140325.2  | 0.0000 | No |
| 8129 | AC140325.3  | 0.0000 | No |
| 8130 | AC140325.4  | 0.0000 | No |
| 8131 | AC140365.1  | 0.0000 | No |
| 8132 | AC145392.1  | 0.0000 | No |
| 8133 | AC147560.1  | 0.0000 | No |
| 8134 | AC149090.1  | 0.0000 | No |
| 8135 | AC149294.1  | 0.0000 | No |
| 8136 | AC149294.2  | 0.0000 | No |
| 8137 | AC151286.1  | 0.0000 | No |
| 8138 | AC151967.1  | 0.0000 | No |
| 8139 | AC152063.1  | 0.0000 | No |

|      |            |        |    |
|------|------------|--------|----|
| 8140 | AC152063.2 | 0.0000 | No |
| 8141 | AC152063.3 | 0.0000 | No |
| 8142 | AC153872.1 | 0.0000 | No |
| 8143 | AC154296.1 | 0.0000 | No |
| 8144 | AC154343.1 | 0.0000 | No |
| 8145 | AC154540.1 | 0.0000 | No |
| 8146 | AC154679.1 | 0.0000 | No |
| 8147 | AC154679.2 | 0.0000 | No |
| 8148 | AC154679.3 | 0.0000 | No |
| 8149 | AC155839.1 | 0.0000 | No |
| 8150 | AC156953.1 | 0.0000 | No |
| 8151 | AC157602.1 | 0.0000 | No |
| 8152 | AC157822.1 | 0.0000 | No |
| 8153 | AC157822.2 | 0.0000 | No |
| 8154 | AC157928.1 | 0.0000 | No |
| 8155 | AC163611.1 | 0.0000 | No |
| 8156 | AC163611.2 | 0.0000 | No |
| 8157 | AC164084.1 | 0.0000 | No |
| 8158 | AC164084.2 | 0.0000 | No |
| 8159 | AC164084.3 | 0.0000 | No |
| 8160 | AC164883.1 | 0.0000 | No |
| 8161 | AC165294.1 | 0.0000 | No |
| 8162 | AC165294.2 | 0.0000 | No |
| 8163 | AC165294.3 | 0.0000 | No |
| 8164 | AC166710.1 | 0.0000 | No |
| 8165 | AC166710.3 | 0.0000 | No |
| 8166 | AC167245.5 | 0.0000 | No |
| 8167 | AC167245.6 | 0.0000 | No |
| 8168 | AC168054.1 | 0.0000 | No |
| 8169 | AC168977.1 | 0.0000 | No |
| 8170 | AC168977.2 | 0.0000 | No |
| 8171 | AC182748.1 | 0.0000 | No |
| 8172 | AC202135.1 | 0.0000 | No |
| 8173 | AC234645.1 | 0.0000 | No |
| 8174 | AC240971.1 | 0.0000 | No |
| 8175 | AC240971.2 | 0.0000 | No |
| 8176 | AC243907.1 | 0.0000 | No |
| 8177 | AC244695.1 | 0.0000 | No |
| 8178 | AC245272.1 | 0.0000 | No |
| 8179 | AC245272.2 | 0.0000 | No |
| 8180 | Acaa1a     | 0.0000 | No |
| 8181 | Acaa1b     | 0.0000 | No |
| 8182 | Acaa2      | 0.0000 | No |
| 8183 | Acaca      | 0.0000 | No |
| 8184 | Acacb      | 0.0000 | No |
| 8185 | Acad10     | 0.0000 | No |

|      |         |        |    |
|------|---------|--------|----|
| 8186 | Acad11  | 0.0000 | No |
| 8187 | Acad12  | 0.0000 | No |
| 8188 | Acad8   | 0.0000 | No |
| 8189 | Acad9   | 0.0000 | No |
| 8190 | Acadl   | 0.0000 | No |
| 8191 | Acadm   | 0.0000 | No |
| 8192 | Acads   | 0.0000 | No |
| 8193 | Acadsb  | 0.0000 | No |
| 8194 | Acadv1  | 0.0000 | No |
| 8195 | Acan    | 0.0000 | No |
| 8196 | Acap2   | 0.0000 | No |
| 8197 | Acap3   | 0.0000 | No |
| 8198 | Acat1   | 0.0000 | No |
| 8199 | Acat2   | 0.0000 | No |
| 8200 | Acat3   | 0.0000 | No |
| 8201 | Acbd3   | 0.0000 | No |
| 8202 | Acbd4   | 0.0000 | No |
| 8203 | Acbd5   | 0.0000 | No |
| 8204 | Acbd6   | 0.0000 | No |
| 8205 | Acbd7   | 0.0000 | No |
| 8206 | Accs    | 0.0000 | No |
| 8207 | Acd     | 0.0000 | No |
| 8208 | Ace3    | 0.0000 | No |
| 8209 | ACEA_U3 | 0.0000 | No |
| 8210 | Acer1   | 0.0000 | No |
| 8211 | Acer2   | 0.0000 | No |
| 8212 | Acer3   | 0.0000 | No |
| 8213 | Ache    | 0.0000 | No |
| 8214 | Acin1   | 0.0000 | No |
| 8215 | Ackr1   | 0.0000 | No |
| 8216 | Ackr3   | 0.0000 | No |
| 8217 | Ackr4   | 0.0000 | No |
| 8218 | Acly    | 0.0000 | No |
| 8219 | Acnat1  | 0.0000 | No |
| 8220 | Acnat2  | 0.0000 | No |
| 8221 | Aco1    | 0.0000 | No |
| 8222 | Aco2    | 0.0000 | No |
| 8223 | Acot1   | 0.0000 | No |
| 8224 | Acot10  | 0.0000 | No |
| 8225 | Acot12  | 0.0000 | No |
| 8226 | Acot13  | 0.0000 | No |
| 8227 | Acot2   | 0.0000 | No |
| 8228 | Acot3   | 0.0000 | No |
| 8229 | Acot4   | 0.0000 | No |
| 8230 | Acot6   | 0.0000 | No |
| 8231 | Acot7   | 0.0000 | No |

|      |          |        |    |
|------|----------|--------|----|
| 8232 | Acot8    | 0.0000 | No |
| 8233 | Acot9    | 0.0000 | No |
| 8234 | Acox1    | 0.0000 | No |
| 8235 | Acox2    | 0.0000 | No |
| 8236 | Acox3    | 0.0000 | No |
| 8237 | Acox1    | 0.0000 | No |
| 8238 | Acp1     | 0.0000 | No |
| 8239 | Acp5     | 0.0000 | No |
| 8240 | Acp6     | 0.0000 | No |
| 8241 | Acp7     | 0.0000 | No |
| 8242 | Acpp     | 0.0000 | No |
| 8243 | Acpt     | 0.0000 | No |
| 8244 | Acr      | 0.0000 | No |
| 8245 | Acrv1    | 0.0000 | No |
| 8246 | Acsbg2   | 0.0000 | No |
| 8247 | Acsf2    | 0.0000 | No |
| 8248 | Acsf3    | 0.0000 | No |
| 8249 | Acs11    | 0.0000 | No |
| 8250 | Acs13    | 0.0000 | No |
| 8251 | Acs14    | 0.0000 | No |
| 8252 | Acs15    | 0.0000 | No |
| 8253 | Acs16    | 0.0000 | No |
| 8254 | Acsm1    | 0.0000 | No |
| 8255 | Acsm2    | 0.0000 | No |
| 8256 | Acsm3    | 0.0000 | No |
| 8257 | Acss1    | 0.0000 | No |
| 8258 | Acss2    | 0.0000 | No |
| 8259 | Acss2os  | 0.0000 | No |
| 8260 | Acss3    | 0.0000 | No |
| 8261 | Acta1    | 0.0000 | No |
| 8262 | Acta2    | 0.0000 | No |
| 8263 | Actb     | 0.0000 | No |
| 8264 | Actb12   | 0.0000 | No |
| 8265 | Actc1    | 0.0000 | No |
| 8266 | Actg1    | 0.0000 | No |
| 8267 | Actg2    | 0.0000 | No |
| 8268 | Actg-ps1 | 0.0000 | No |
| 8269 | Actl11   | 0.0000 | No |
| 8270 | Actl6a   | 0.0000 | No |
| 8271 | Actl6b   | 0.0000 | No |
| 8272 | Actl7a   | 0.0000 | No |
| 8273 | Actl7b   | 0.0000 | No |
| 8274 | Actl9    | 0.0000 | No |
| 8275 | Actn2    | 0.0000 | No |
| 8276 | Actn3    | 0.0000 | No |
| 8277 | Actn4    | 0.0000 | No |

|      |         |        |    |
|------|---------|--------|----|
| 8278 | Actr10  | 0.0000 | No |
| 8279 | Actr1a  | 0.0000 | No |
| 8280 | Actr1b  | 0.0000 | No |
| 8281 | Actr2   | 0.0000 | No |
| 8282 | Actr3   | 0.0000 | No |
| 8283 | Actr3b  | 0.0000 | No |
| 8284 | Actr5   | 0.0000 | No |
| 8285 | Actr6   | 0.0000 | No |
| 8286 | Actr8   | 0.0000 | No |
| 8287 | Actrt1  | 0.0000 | No |
| 8288 | Actrt2  | 0.0000 | No |
| 8289 | Acvr1   | 0.0000 | No |
| 8290 | Acvr1b  | 0.0000 | No |
| 8291 | Acvr1c  | 0.0000 | No |
| 8292 | Acvr2b  | 0.0000 | No |
| 8293 | Acy1    | 0.0000 | No |
| 8294 | Acy3    | 0.0000 | No |
| 8295 | Acyp1   | 0.0000 | No |
| 8296 | Acyp2   | 0.0000 | No |
| 8297 | Ada     | 0.0000 | No |
| 8298 | Adad1   | 0.0000 | No |
| 8299 | Adad2   | 0.0000 | No |
| 8300 | Adal    | 0.0000 | No |
| 8301 | Adam10  | 0.0000 | No |
| 8302 | Adam11  | 0.0000 | No |
| 8303 | Adam12  | 0.0000 | No |
| 8304 | Adam15  | 0.0000 | No |
| 8305 | Adam17  | 0.0000 | No |
| 8306 | Adam19  | 0.0000 | No |
| 8307 | Adam1a  | 0.0000 | No |
| 8308 | Adam1b  | 0.0000 | No |
| 8309 | Adam20  | 0.0000 | No |
| 8310 | Adam21  | 0.0000 | No |
| 8311 | Adam22  | 0.0000 | No |
| 8312 | Adam23  | 0.0000 | No |
| 8313 | Adam24  | 0.0000 | No |
| 8314 | Adam25  | 0.0000 | No |
| 8315 | Adam26a | 0.0000 | No |
| 8316 | Adam26b | 0.0000 | No |
| 8317 | Adam28  | 0.0000 | No |
| 8318 | Adam29  | 0.0000 | No |
| 8319 | Adam3   | 0.0000 | No |
| 8320 | Adam30  | 0.0000 | No |
| 8321 | Adam32  | 0.0000 | No |
| 8322 | Adam33  | 0.0000 | No |
| 8323 | Adam34  | 0.0000 | No |

|      |          |        |    |
|------|----------|--------|----|
| 8324 | Adam39   | 0.0000 | No |
| 8325 | Adam4    | 0.0000 | No |
| 8326 | Adam5    | 0.0000 | No |
| 8327 | Adam6a   | 0.0000 | No |
| 8328 | Adam6b   | 0.0000 | No |
| 8329 | Adam8    | 0.0000 | No |
| 8330 | Adam9    | 0.0000 | No |
| 8331 | Adamts1  | 0.0000 | No |
| 8332 | Adamts12 | 0.0000 | No |
| 8333 | Adamts13 | 0.0000 | No |
| 8334 | Adamts14 | 0.0000 | No |
| 8335 | Adamts15 | 0.0000 | No |
| 8336 | Adamts16 | 0.0000 | No |
| 8337 | Adamts17 | 0.0000 | No |
| 8338 | Adamts18 | 0.0000 | No |
| 8339 | Adamts19 | 0.0000 | No |
| 8340 | Adamts2  | 0.0000 | No |
| 8341 | Adamts3  | 0.0000 | No |
| 8342 | Adamts4  | 0.0000 | No |
| 8343 | Adamts5  | 0.0000 | No |
| 8344 | Adamts6  | 0.0000 | No |
| 8345 | Adamts7  | 0.0000 | No |
| 8346 | Adamts8  | 0.0000 | No |
| 8347 | Adamts9  | 0.0000 | No |
| 8348 | Adamts11 | 0.0000 | No |
| 8349 | Adamts12 | 0.0000 | No |
| 8350 | Adamts13 | 0.0000 | No |
| 8351 | Adamts14 | 0.0000 | No |
| 8352 | Adamts15 | 0.0000 | No |
| 8353 | Adap1    | 0.0000 | No |
| 8354 | Adap2    | 0.0000 | No |
| 8355 | Adap2os  | 0.0000 | No |
| 8356 | Adar     | 0.0000 | No |
| 8357 | Adarb1   | 0.0000 | No |
| 8358 | Adarb2   | 0.0000 | No |
| 8359 | Adat1    | 0.0000 | No |
| 8360 | Adat2    | 0.0000 | No |
| 8361 | Adck1    | 0.0000 | No |
| 8362 | Adck2    | 0.0000 | No |
| 8363 | Adck5    | 0.0000 | No |
| 8364 | Adcy1    | 0.0000 | No |
| 8365 | Adcy10   | 0.0000 | No |
| 8366 | Adcy2    | 0.0000 | No |
| 8367 | Adcy4    | 0.0000 | No |
| 8368 | Adcy5    | 0.0000 | No |
| 8369 | Adcy7    | 0.0000 | No |

|      |           |        |    |
|------|-----------|--------|----|
| 8370 | Adcy8     | 0.0000 | No |
| 8371 | Adcy9     | 0.0000 | No |
| 8372 | Adcyap1r1 | 0.0000 | No |
| 8373 | Add1      | 0.0000 | No |
| 8374 | Add2      | 0.0000 | No |
| 8375 | Add3      | 0.0000 | No |
| 8376 | Adgb      | 0.0000 | No |
| 8377 | Adgra1    | 0.0000 | No |
| 8378 | Adgra2    | 0.0000 | No |
| 8379 | Adgra3    | 0.0000 | No |
| 8380 | Adgrb1    | 0.0000 | No |
| 8381 | Adgrd1    | 0.0000 | No |
| 8382 | Adgrd2-ps | 0.0000 | No |
| 8383 | Adgre5    | 0.0000 | No |
| 8384 | Adgrf1    | 0.0000 | No |
| 8385 | Adgrf2    | 0.0000 | No |
| 8386 | Adgrf3    | 0.0000 | No |
| 8387 | Adgrf4    | 0.0000 | No |
| 8388 | Adgrf5    | 0.0000 | No |
| 8389 | Adgrg1    | 0.0000 | No |
| 8390 | Adgrg2    | 0.0000 | No |
| 8391 | Adgrg3    | 0.0000 | No |
| 8392 | Adgrg4    | 0.0000 | No |
| 8393 | Adgrg6    | 0.0000 | No |
| 8394 | Adgrg7    | 0.0000 | No |
| 8395 | Adgrl2    | 0.0000 | No |
| 8396 | Adgrl3    | 0.0000 | No |
| 8397 | Adgrl4    | 0.0000 | No |
| 8398 | Adgrv1    | 0.0000 | No |
| 8399 | Adh1      | 0.0000 | No |
| 8400 | Adh4      | 0.0000 | No |
| 8401 | Adh5      | 0.0000 | No |
| 8402 | Adh6a     | 0.0000 | No |
| 8403 | Adh6b     | 0.0000 | No |
| 8404 | Adh6-ps1  | 0.0000 | No |
| 8405 | Adh7      | 0.0000 | No |
| 8406 | Adhfe1    | 0.0000 | No |
| 8407 | Adi1      | 0.0000 | No |
| 8408 | Adig      | 0.0000 | No |
| 8409 | Adipor1   | 0.0000 | No |
| 8410 | Adipor2   | 0.0000 | No |
| 8411 | Adm2      | 0.0000 | No |
| 8412 | Adnp      | 0.0000 | No |
| 8413 | Adnp2     | 0.0000 | No |
| 8414 | Ado       | 0.0000 | No |
| 8415 | Adora1    | 0.0000 | No |

|      |                |        |    |
|------|----------------|--------|----|
| 8416 | Adora2a        | 0.0000 | No |
| 8417 | Adora2b        | 0.0000 | No |
| 8418 | Adora3         | 0.0000 | No |
| 8419 | Adpgk          | 0.0000 | No |
| 8420 | Adprh          | 0.0000 | No |
| 8421 | Adprhl1        | 0.0000 | No |
| 8422 | Adprhl2        | 0.0000 | No |
| 8423 | Adprm          | 0.0000 | No |
| 8424 | Adra1a         | 0.0000 | No |
| 8425 | Adra1b         | 0.0000 | No |
| 8426 | Adra1d         | 0.0000 | No |
| 8427 | Adra2b         | 0.0000 | No |
| 8428 | Adra2c         | 0.0000 | No |
| 8429 | Adrb1          | 0.0000 | No |
| 8430 | Adrb2          | 0.0000 | No |
| 8431 | Adrb3          | 0.0000 | No |
| 8432 | Adrm1          | 0.0000 | No |
| 8433 | Adsl           | 0.0000 | No |
| 8434 | Adss           | 0.0000 | No |
| 8435 | Adssl1         | 0.0000 | No |
| 8436 | Adtrp          | 0.0000 | No |
| 8437 | Aebp2          | 0.0000 | No |
| 8438 | AEKQ02166790.1 | 0.0000 | No |
| 8439 | AEKR01077154.1 | 0.0000 | No |
| 8440 | Aen            | 0.0000 | No |
| 8441 | Aes            | 0.0000 | No |
| 8442 | AF067061       | 0.0000 | No |
| 8443 | AF067063       | 0.0000 | No |
| 8444 | AF357341       | 0.0000 | No |
| 8445 | AF357399       | 0.0000 | No |
| 8446 | AF357425       | 0.0000 | No |
| 8447 | AF357428       | 0.0000 | No |
| 8448 | AF366264       | 0.0000 | No |
| 8449 | AF529169       | 0.0000 | No |
| 8450 | Afap1          | 0.0000 | No |
| 8451 | Afap111        | 0.0000 | No |
| 8452 | Afap112        | 0.0000 | No |
| 8453 | Afdn           | 0.0000 | No |
| 8454 | Aff1           | 0.0000 | No |
| 8455 | Aff2           | 0.0000 | No |
| 8456 | Aff3           | 0.0000 | No |
| 8457 | Aff4           | 0.0000 | No |
| 8458 | Afg311         | 0.0000 | No |
| 8459 | Afg312         | 0.0000 | No |
| 8460 | Afm            | 0.0000 | No |
| 8461 | Afmid          | 0.0000 | No |



|      |         |        |    |
|------|---------|--------|----|
| 8462 | Afp     | 0.0000 | No |
| 8463 | Aftph   | 0.0000 | No |
| 8464 | Aga     | 0.0000 | No |
| 8465 | Agap1   | 0.0000 | No |
| 8466 | Agap2   | 0.0000 | No |
| 8467 | Agap3   | 0.0000 | No |
| 8468 | Agbl1   | 0.0000 | No |
| 8469 | Agbl2   | 0.0000 | No |
| 8470 | Agbl3   | 0.0000 | No |
| 8471 | Agbl4   | 0.0000 | No |
| 8472 | Agbl5   | 0.0000 | No |
| 8473 | Ager    | 0.0000 | No |
| 8474 | Agfg1   | 0.0000 | No |
| 8475 | Agfg2   | 0.0000 | No |
| 8476 | Aggf1   | 0.0000 | No |
| 8477 | Agk     | 0.0000 | No |
| 8478 | Agl     | 0.0000 | No |
| 8479 | Agmat   | 0.0000 | No |
| 8480 | Agmo    | 0.0000 | No |
| 8481 | Ago1    | 0.0000 | No |
| 8482 | Ago2    | 0.0000 | No |
| 8483 | Ago3    | 0.0000 | No |
| 8484 | Agpat1  | 0.0000 | No |
| 8485 | Agpat2  | 0.0000 | No |
| 8486 | Agpat3  | 0.0000 | No |
| 8487 | Agpat4  | 0.0000 | No |
| 8488 | Agpat5  | 0.0000 | No |
| 8489 | Agpat9  | 0.0000 | No |
| 8490 | Agps    | 0.0000 | No |
| 8491 | Agr2    | 0.0000 | No |
| 8492 | Agr3    | 0.0000 | No |
| 8493 | Ag rn   | 0.0000 | No |
| 8494 | Ag rp   | 0.0000 | No |
| 8495 | Agt     | 0.0000 | No |
| 8496 | Agtpbp1 | 0.0000 | No |
| 8497 | Agtr1a  | 0.0000 | No |
| 8498 | Agtr2   | 0.0000 | No |
| 8499 | Agtrap  | 0.0000 | No |
| 8500 | Agxt2   | 0.0000 | No |
| 8501 | Ahctf1  | 0.0000 | No |
| 8502 | Ahcy    | 0.0000 | No |
| 8503 | Ahcy11  | 0.0000 | No |
| 8504 | Ahcy12  | 0.0000 | No |
| 8505 | Ahdc1   | 0.0000 | No |
| 8506 | Ahi1    | 0.0000 | No |
| 8507 | Ahnak   | 0.0000 | No |

|      |          |        |    |
|------|----------|--------|----|
| 8508 | Ahnak2   | 0.0000 | No |
| 8509 | Ahr      | 0.0000 | No |
| 8510 | Ahrr     | 0.0000 | No |
| 8511 | Ahsa1    | 0.0000 | No |
| 8512 | Ahsa2    | 0.0000 | No |
| 8513 | Ahsg     | 0.0000 | No |
| 8514 | AI115009 | 0.0000 | No |
| 8515 | AI182371 | 0.0000 | No |
| 8516 | AI314180 | 0.0000 | No |
| 8517 | AI314278 | 0.0000 | No |
| 8518 | AI413582 | 0.0000 | No |
| 8519 | AI427809 | 0.0000 | No |
| 8520 | AI464131 | 0.0000 | No |
| 8521 | AI467606 | 0.0000 | No |
| 8522 | AI480526 | 0.0000 | No |
| 8523 | AI481877 | 0.0000 | No |
| 8524 | AI506816 | 0.0000 | No |
| 8525 | AI507597 | 0.0000 | No |
| 8526 | AI593442 | 0.0000 | No |
| 8527 | AI597479 | 0.0000 | No |
| 8528 | AI606181 | 0.0000 | No |
| 8529 | AI606473 | 0.0000 | No |
| 8530 | AI646519 | 0.0000 | No |
| 8531 | AI661453 | 0.0000 | No |
| 8532 | AI662270 | 0.0000 | No |
| 8533 | AI837181 | 0.0000 | No |
| 8534 | AI838599 | 0.0000 | No |
| 8535 | AI839979 | 0.0000 | No |
| 8536 | AI846148 | 0.0000 | No |
| 8537 | AI847159 | 0.0000 | No |
| 8538 | AI849053 | 0.0000 | No |
| 8539 | AI854703 | 0.0000 | No |
| 8540 | AI987944 | 0.0000 | No |
| 8541 | Aicda    | 0.0000 | No |
| 8542 | Aida     | 0.0000 | No |
| 8543 | Aif1     | 0.0000 | No |
| 8544 | Aif11    | 0.0000 | No |
| 8545 | Aifm1    | 0.0000 | No |
| 8546 | Aifm3    | 0.0000 | No |
| 8547 | Aig1     | 0.0000 | No |
| 8548 | Aim1     | 0.0000 | No |
| 8549 | Aim11    | 0.0000 | No |
| 8550 | Aim2     | 0.0000 | No |
| 8551 | Aimp1    | 0.0000 | No |
| 8552 | Aimp2    | 0.0000 | No |
| 8553 | Aip      | 0.0000 | No |

|      |            |        |    |
|------|------------|--------|----|
| 8554 | Aire       | 0.0000 | No |
| 8555 | Airn       | 0.0000 | No |
| 8556 | Ajap1      | 0.0000 | No |
| 8557 | Ajuba      | 0.0000 | No |
| 8558 | AK010878   | 0.0000 | No |
| 8559 | Ak1        | 0.0000 | No |
| 8560 | AK157302   | 0.0000 | No |
| 8561 | Ak2        | 0.0000 | No |
| 8562 | Ak3        | 0.0000 | No |
| 8563 | Ak4        | 0.0000 | No |
| 8564 | Ak5        | 0.0000 | No |
| 8565 | Ak6        | 0.0000 | No |
| 8566 | Ak7        | 0.0000 | No |
| 8567 | Ak9        | 0.0000 | No |
| 8568 | Akain1     | 0.0000 | No |
| 8569 | Akap1      | 0.0000 | No |
| 8570 | Akap10     | 0.0000 | No |
| 8571 | Akap11     | 0.0000 | No |
| 8572 | Akap13     | 0.0000 | No |
| 8573 | Akap14     | 0.0000 | No |
| 8574 | Akap17b    | 0.0000 | No |
| 8575 | Akap3      | 0.0000 | No |
| 8576 | Akap4      | 0.0000 | No |
| 8577 | Akap5      | 0.0000 | No |
| 8578 | Akap6      | 0.0000 | No |
| 8579 | Akap7      | 0.0000 | No |
| 8580 | Akap8      | 0.0000 | No |
| 8581 | Akap8l     | 0.0000 | No |
| 8582 | Akap9      | 0.0000 | No |
| 8583 | Akip1      | 0.0000 | No |
| 8584 | Akirin1    | 0.0000 | No |
| 8585 | Akirin1-ps | 0.0000 | No |
| 8586 | Akirin2    | 0.0000 | No |
| 8587 | Aknad1     | 0.0000 | No |
| 8588 | Aknaos     | 0.0000 | No |
| 8589 | Akp-ps1    | 0.0000 | No |
| 8590 | Akr1a1     | 0.0000 | No |
| 8591 | Akr1b10    | 0.0000 | No |
| 8592 | Akr1b3     | 0.0000 | No |
| 8593 | Akr1b7     | 0.0000 | No |
| 8594 | Akr1c12    | 0.0000 | No |
| 8595 | Akr1c14    | 0.0000 | No |
| 8596 | Akr1c19    | 0.0000 | No |
| 8597 | Akr1c20    | 0.0000 | No |
| 8598 | Akr1c21    | 0.0000 | No |
| 8599 | Akr1c6     | 0.0000 | No |

|      |            |        |    |
|------|------------|--------|----|
| 8600 | Akr1d1     | 0.0000 | No |
| 8601 | Akr1e1     | 0.0000 | No |
| 8602 | Akr7a5     | 0.0000 | No |
| 8603 | Akt1       | 0.0000 | No |
| 8604 | Akt1s1     | 0.0000 | No |
| 8605 | Akt2       | 0.0000 | No |
| 8606 | Akt2-ps    | 0.0000 | No |
| 8607 | Akt3       | 0.0000 | No |
| 8608 | Aktip      | 0.0000 | No |
| 8609 | AL593843.1 | 0.0000 | No |
| 8610 | AL593853.1 | 0.0000 | No |
| 8611 | AL596383.1 | 0.0000 | No |
| 8612 | AL603834.1 | 0.0000 | No |
| 8613 | AL611930.1 | 0.0000 | No |
| 8614 | AL645522.1 | 0.0000 | No |
| 8615 | AL645739.1 | 0.0000 | No |
| 8616 | AL669898.1 | 0.0000 | No |
| 8617 | AL672049.1 | 0.0000 | No |
| 8618 | AL772271.1 | 0.0000 | No |
| 8619 | AL845457.1 | 0.0000 | No |
| 8620 | AL928567.1 | 0.0000 | No |
| 8621 | AL954388.1 | 0.0000 | No |
| 8622 | Alad       | 0.0000 | No |
| 8623 | Alas1      | 0.0000 | No |
| 8624 | Alas2      | 0.0000 | No |
| 8625 | Alb        | 0.0000 | No |
| 8626 | Alcam      | 0.0000 | No |
| 8627 | Aldh16a1   | 0.0000 | No |
| 8628 | Aldh18a1   | 0.0000 | No |
| 8629 | Aldh1a1    | 0.0000 | No |
| 8630 | Aldh1a2    | 0.0000 | No |
| 8631 | Aldh1a3    | 0.0000 | No |
| 8632 | Aldh1a7    | 0.0000 | No |
| 8633 | Aldh1b1    | 0.0000 | No |
| 8634 | Aldh1l1    | 0.0000 | No |
| 8635 | Aldh1l2    | 0.0000 | No |
| 8636 | Aldh2      | 0.0000 | No |
| 8637 | Aldh3a2    | 0.0000 | No |
| 8638 | Aldh3b2    | 0.0000 | No |
| 8639 | Aldh3b3    | 0.0000 | No |
| 8640 | Aldh4a1    | 0.0000 | No |
| 8641 | Aldh5a1    | 0.0000 | No |
| 8642 | Aldh6a1    | 0.0000 | No |
| 8643 | Aldh7a1    | 0.0000 | No |
| 8644 | Aldh8a1    | 0.0000 | No |
| 8645 | Aldh9a1    | 0.0000 | No |

|      |           |        |    |
|------|-----------|--------|----|
| 8646 | Aldoa     | 0.0000 | No |
| 8647 | Aldoart1  | 0.0000 | No |
| 8648 | Aldoart2  | 0.0000 | No |
| 8649 | Aldob     | 0.0000 | No |
| 8650 | Aldoc     | 0.0000 | No |
| 8651 | Alg1      | 0.0000 | No |
| 8652 | Alg10b    | 0.0000 | No |
| 8653 | Alg11     | 0.0000 | No |
| 8654 | Alg12     | 0.0000 | No |
| 8655 | Alg13     | 0.0000 | No |
| 8656 | Alg14     | 0.0000 | No |
| 8657 | Alg2      | 0.0000 | No |
| 8658 | Alg3      | 0.0000 | No |
| 8659 | Alg5      | 0.0000 | No |
| 8660 | Alg6      | 0.0000 | No |
| 8661 | Alg8      | 0.0000 | No |
| 8662 | Alg9      | 0.0000 | No |
| 8663 | Alk       | 0.0000 | No |
| 8664 | Alkbh1    | 0.0000 | No |
| 8665 | Alkbh2    | 0.0000 | No |
| 8666 | Alkbh3os1 | 0.0000 | No |
| 8667 | Alkbh4    | 0.0000 | No |
| 8668 | Alkbh5    | 0.0000 | No |
| 8669 | Alkbh6    | 0.0000 | No |
| 8670 | Alkbh7    | 0.0000 | No |
| 8671 | Alkbh8    | 0.0000 | No |
| 8672 | Allc      | 0.0000 | No |
| 8673 | Alms1     | 0.0000 | No |
| 8674 | Alms1-ps1 | 0.0000 | No |
| 8675 | Alox12    | 0.0000 | No |
| 8676 | Alox12b   | 0.0000 | No |
| 8677 | Alox15    | 0.0000 | No |
| 8678 | Alox5     | 0.0000 | No |
| 8679 | Alox5ap   | 0.0000 | No |
| 8680 | Alox8     | 0.0000 | No |
| 8681 | Aloxe3    | 0.0000 | No |
| 8682 | Alpk1     | 0.0000 | No |
| 8683 | Alpk2     | 0.0000 | No |
| 8684 | Alpk3     | 0.0000 | No |
| 8685 | Alpl      | 0.0000 | No |
| 8686 | Alpl2     | 0.0000 | No |
| 8687 | Als2      | 0.0000 | No |
| 8688 | Als2cr11  | 0.0000 | No |
| 8689 | Als2cr11b | 0.0000 | No |
| 8690 | Als2cr12  | 0.0000 | No |
| 8691 | Alx1      | 0.0000 | No |

|      |          |        |    |
|------|----------|--------|----|
| 8692 | Alx4     | 0.0000 | No |
| 8693 | Alyref   | 0.0000 | No |
| 8694 | Alyref2  | 0.0000 | No |
| 8695 | Amacr    | 0.0000 | No |
| 8696 | Ambn     | 0.0000 | No |
| 8697 | Ambp     | 0.0000 | No |
| 8698 | Ambra1   | 0.0000 | No |
| 8699 | Amd1     | 0.0000 | No |
| 8700 | Amd2     | 0.0000 | No |
| 8701 | Amdhd1   | 0.0000 | No |
| 8702 | Amdhd2   | 0.0000 | No |
| 8703 | Amd-ps1  | 0.0000 | No |
| 8704 | Amd-ps3  | 0.0000 | No |
| 8705 | Amd-ps4  | 0.0000 | No |
| 8706 | Amd-ps5  | 0.0000 | No |
| 8707 | Amelx    | 0.0000 | No |
| 8708 | Amer1    | 0.0000 | No |
| 8709 | Amer2    | 0.0000 | No |
| 8710 | Amer3    | 0.0000 | No |
| 8711 | Amfr     | 0.0000 | No |
| 8712 | Amh      | 0.0000 | No |
| 8713 | Amhr2    | 0.0000 | No |
| 8714 | Amica1   | 0.0000 | No |
| 8715 | Amigo1   | 0.0000 | No |
| 8716 | Amigo2   | 0.0000 | No |
| 8717 | Amigo3   | 0.0000 | No |
| 8718 | Ammecl1  | 0.0000 | No |
| 8719 | Ammecl1l | 0.0000 | No |
| 8720 | Amn      | 0.0000 | No |
| 8721 | Amn1     | 0.0000 | No |
| 8722 | Amot     | 0.0000 | No |
| 8723 | Amotl1   | 0.0000 | No |
| 8724 | Amotl2   | 0.0000 | No |
| 8725 | Ampd1    | 0.0000 | No |
| 8726 | Ampd2    | 0.0000 | No |
| 8727 | Ampd3    | 0.0000 | No |
| 8728 | Amph     | 0.0000 | No |
| 8729 | Amt      | 0.0000 | No |
| 8730 | Amtn     | 0.0000 | No |
| 8731 | Amy1     | 0.0000 | No |
| 8732 | Amy2a1   | 0.0000 | No |
| 8733 | Amy2a2   | 0.0000 | No |
| 8734 | Amy2a3   | 0.0000 | No |
| 8735 | Amy2a4   | 0.0000 | No |
| 8736 | Amy2a5   | 0.0000 | No |
| 8737 | Amy2b    | 0.0000 | No |

|      |            |        |    |
|------|------------|--------|----|
| 8738 | Amy2-ps1   | 0.0000 | No |
| 8739 | Amz1       | 0.0000 | No |
| 8740 | Amz2       | 0.0000 | No |
| 8741 | Anapc1     | 0.0000 | No |
| 8742 | Anapc10    | 0.0000 | No |
| 8743 | Anapc11    | 0.0000 | No |
| 8744 | Anapc13    | 0.0000 | No |
| 8745 | Anapc15    | 0.0000 | No |
| 8746 | Anapc15-ps | 0.0000 | No |
| 8747 | Anapc16    | 0.0000 | No |
| 8748 | Anapc2     | 0.0000 | No |
| 8749 | Anapc4     | 0.0000 | No |
| 8750 | Anapc5     | 0.0000 | No |
| 8751 | Anapc7     | 0.0000 | No |
| 8752 | Ang        | 0.0000 | No |
| 8753 | Ang4       | 0.0000 | No |
| 8754 | Ang5       | 0.0000 | No |
| 8755 | Ang6       | 0.0000 | No |
| 8756 | Angel1     | 0.0000 | No |
| 8757 | Angel2     | 0.0000 | No |
| 8758 | Ang-ps1    | 0.0000 | No |
| 8759 | Ang-ps2    | 0.0000 | No |
| 8760 | Ang-ps3    | 0.0000 | No |
| 8761 | Angpt1     | 0.0000 | No |
| 8762 | Angpt2     | 0.0000 | No |
| 8763 | Angpt4     | 0.0000 | No |
| 8764 | Angpt11    | 0.0000 | No |
| 8765 | Angpt12    | 0.0000 | No |
| 8766 | Angpt13    | 0.0000 | No |
| 8767 | Angpt14    | 0.0000 | No |
| 8768 | Angpt16    | 0.0000 | No |
| 8769 | Angpt17    | 0.0000 | No |
| 8770 | Angpt18    | 0.0000 | No |
| 8771 | Ank        | 0.0000 | No |
| 8772 | Ank1       | 0.0000 | No |
| 8773 | Ank2       | 0.0000 | No |
| 8774 | Ank3       | 0.0000 | No |
| 8775 | Ankar      | 0.0000 | No |
| 8776 | Ankdd1b    | 0.0000 | No |
| 8777 | Ankef1     | 0.0000 | No |
| 8778 | Ankfy1     | 0.0000 | No |
| 8779 | Ankhd1     | 0.0000 | No |
| 8780 | Ankib1     | 0.0000 | No |
| 8781 | Ankk1      | 0.0000 | No |
| 8782 | Ankle1     | 0.0000 | No |
| 8783 | Ankle2     | 0.0000 | No |

|      |          |        |    |
|------|----------|--------|----|
| 8784 | Ankmy1   | 0.0000 | No |
| 8785 | Ankmy2   | 0.0000 | No |
| 8786 | Ankra2   | 0.0000 | No |
| 8787 | Ankrd1   | 0.0000 | No |
| 8788 | Ankrd10  | 0.0000 | No |
| 8789 | Ankrd11  | 0.0000 | No |
| 8790 | Ankrd12  | 0.0000 | No |
| 8791 | Ankrd13a | 0.0000 | No |
| 8792 | Ankrd13b | 0.0000 | No |
| 8793 | Ankrd13c | 0.0000 | No |
| 8794 | Ankrd13d | 0.0000 | No |
| 8795 | Ankrd16  | 0.0000 | No |
| 8796 | Ankrd17  | 0.0000 | No |
| 8797 | Ankrd2   | 0.0000 | No |
| 8798 | Ankrd22  | 0.0000 | No |
| 8799 | Ankrd23  | 0.0000 | No |
| 8800 | Ankrd24  | 0.0000 | No |
| 8801 | Ankrd26  | 0.0000 | No |
| 8802 | Ankrd27  | 0.0000 | No |
| 8803 | Ankrd28  | 0.0000 | No |
| 8804 | Ankrd29  | 0.0000 | No |
| 8805 | Ankrd31  | 0.0000 | No |
| 8806 | Ankrd33  | 0.0000 | No |
| 8807 | Ankrd33b | 0.0000 | No |
| 8808 | Ankrd34b | 0.0000 | No |
| 8809 | Ankrd36  | 0.0000 | No |
| 8810 | Ankrd37  | 0.0000 | No |
| 8811 | Ankrd39  | 0.0000 | No |
| 8812 | Ankrd40  | 0.0000 | No |
| 8813 | Ankrd42  | 0.0000 | No |
| 8814 | Ankrd44  | 0.0000 | No |
| 8815 | Ankrd45  | 0.0000 | No |
| 8816 | Ankrd46  | 0.0000 | No |
| 8817 | Ankrd49  | 0.0000 | No |
| 8818 | Ankrd50  | 0.0000 | No |
| 8819 | Ankrd52  | 0.0000 | No |
| 8820 | Ankrd53  | 0.0000 | No |
| 8821 | Ankrd60  | 0.0000 | No |
| 8822 | Ankrd61  | 0.0000 | No |
| 8823 | Ankrd65  | 0.0000 | No |
| 8824 | Ankrd66  | 0.0000 | No |
| 8825 | Ankrd7   | 0.0000 | No |
| 8826 | Ankrd9   | 0.0000 | No |
| 8827 | Anks1    | 0.0000 | No |
| 8828 | Anks1b   | 0.0000 | No |
| 8829 | Anks3    | 0.0000 | No |



|      |            |        |    |
|------|------------|--------|----|
| 8830 | Ankub1     | 0.0000 | No |
| 8831 | Ankzf1     | 0.0000 | No |
| 8832 | Anln       | 0.0000 | No |
| 8833 | Ano1       | 0.0000 | No |
| 8834 | Ano10      | 0.0000 | No |
| 8835 | Ano2       | 0.0000 | No |
| 8836 | Ano3       | 0.0000 | No |
| 8837 | Ano4       | 0.0000 | No |
| 8838 | Ano5       | 0.0000 | No |
| 8839 | Ano6       | 0.0000 | No |
| 8840 | Ano7       | 0.0000 | No |
| 8841 | Ano8       | 0.0000 | No |
| 8842 | Ano9       | 0.0000 | No |
| 8843 | Anp32a     | 0.0000 | No |
| 8844 | Anp32b     | 0.0000 | No |
| 8845 | Anp32b-ps1 | 0.0000 | No |
| 8846 | Anp32e     | 0.0000 | No |
| 8847 | Anp32-ps   | 0.0000 | No |
| 8848 | Anpep      | 0.0000 | No |
| 8849 | Antxr1     | 0.0000 | No |
| 8850 | Antxr2     | 0.0000 | No |
| 8851 | Anxa1      | 0.0000 | No |
| 8852 | Anxa10     | 0.0000 | No |
| 8853 | Anxa11     | 0.0000 | No |
| 8854 | Anxa11os   | 0.0000 | No |
| 8855 | Anxa13     | 0.0000 | No |
| 8856 | Anxa2      | 0.0000 | No |
| 8857 | Anxa3      | 0.0000 | No |
| 8858 | Anxa4      | 0.0000 | No |
| 8859 | Anxa5      | 0.0000 | No |
| 8860 | Anxa6      | 0.0000 | No |
| 8861 | Anxa7      | 0.0000 | No |
| 8862 | Anxa9      | 0.0000 | No |
| 8863 | Aoc1       | 0.0000 | No |
| 8864 | Aoc2       | 0.0000 | No |
| 8865 | Aoc3       | 0.0000 | No |
| 8866 | Aox2       | 0.0000 | No |
| 8867 | Aox3       | 0.0000 | No |
| 8868 | Aox4       | 0.0000 | No |
| 8869 | Ap1ar      | 0.0000 | No |
| 8870 | Ap1b1      | 0.0000 | No |
| 8871 | Ap1g1      | 0.0000 | No |
| 8872 | Ap1g2      | 0.0000 | No |
| 8873 | Ap1m1      | 0.0000 | No |
| 8874 | Ap1m2      | 0.0000 | No |
| 8875 | Ap1s1      | 0.0000 | No |

|      |           |        |    |
|------|-----------|--------|----|
| 8876 | Ap1s2     | 0.0000 | No |
| 8877 | Ap1s3     | 0.0000 | No |
| 8878 | Ap2a2     | 0.0000 | No |
| 8879 | Ap2b1     | 0.0000 | No |
| 8880 | Ap2m1     | 0.0000 | No |
| 8881 | Ap2s1     | 0.0000 | No |
| 8882 | Ap3b1     | 0.0000 | No |
| 8883 | Ap3b2     | 0.0000 | No |
| 8884 | Ap3d1     | 0.0000 | No |
| 8885 | Ap3m1     | 0.0000 | No |
| 8886 | Ap3m1-ps  | 0.0000 | No |
| 8887 | Ap3m2     | 0.0000 | No |
| 8888 | Ap3s1     | 0.0000 | No |
| 8889 | Ap3s1-ps1 | 0.0000 | No |
| 8890 | Ap3s1-ps2 | 0.0000 | No |
| 8891 | Ap3s2     | 0.0000 | No |
| 8892 | Ap4b1     | 0.0000 | No |
| 8893 | Ap4e1     | 0.0000 | No |
| 8894 | Ap4m1     | 0.0000 | No |
| 8895 | Ap4s1     | 0.0000 | No |
| 8896 | Ap5b1     | 0.0000 | No |
| 8897 | Ap5m1     | 0.0000 | No |
| 8898 | Ap5s1     | 0.0000 | No |
| 8899 | Ap5z1     | 0.0000 | No |
| 8900 | Apaf1     | 0.0000 | No |
| 8901 | Apba1     | 0.0000 | No |
| 8902 | Apba2     | 0.0000 | No |
| 8903 | Apba3     | 0.0000 | No |
| 8904 | Apbb1     | 0.0000 | No |
| 8905 | Apbb1ip   | 0.0000 | No |
| 8906 | Apbb2     | 0.0000 | No |
| 8907 | Apc2      | 0.0000 | No |
| 8908 | Apcdd1    | 0.0000 | No |
| 8909 | Apc-ps1   | 0.0000 | No |
| 8910 | Apcs      | 0.0000 | No |
| 8911 | Apeh      | 0.0000 | No |
| 8912 | Apela     | 0.0000 | No |
| 8913 | Apex1     | 0.0000 | No |
| 8914 | Apex2     | 0.0000 | No |
| 8915 | Aph1a     | 0.0000 | No |
| 8916 | Aph1b     | 0.0000 | No |
| 8917 | Aph1c     | 0.0000 | No |
| 8918 | Api5      | 0.0000 | No |
| 8919 | Api5-ps   | 0.0000 | No |
| 8920 | Apip      | 0.0000 | No |
| 8921 | Apitd1    | 0.0000 | No |

|      |          |        |    |
|------|----------|--------|----|
| 8922 | Aplf     | 0.0000 | No |
| 8923 | Aplnr    | 0.0000 | No |
| 8924 | Aplp1    | 0.0000 | No |
| 8925 | Apmap    | 0.0000 | No |
| 8926 | Apoa1bp  | 0.0000 | No |
| 8927 | Apoa2    | 0.0000 | No |
| 8928 | Apoa5    | 0.0000 | No |
| 8929 | Apob     | 0.0000 | No |
| 8930 | Apobec1  | 0.0000 | No |
| 8931 | Apobec2  | 0.0000 | No |
| 8932 | Apobec3  | 0.0000 | No |
| 8933 | Apobec4  | 0.0000 | No |
| 8934 | Apoc1    | 0.0000 | No |
| 8935 | Apoc2    | 0.0000 | No |
| 8936 | Apoc4    | 0.0000 | No |
| 8937 | Apod     | 0.0000 | No |
| 8938 | Apoe     | 0.0000 | No |
| 8939 | Apof     | 0.0000 | No |
| 8940 | Apoh     | 0.0000 | No |
| 8941 | Apol10a  | 0.0000 | No |
| 8942 | Apol10b  | 0.0000 | No |
| 8943 | Apol11b  | 0.0000 | No |
| 8944 | Apol6    | 0.0000 | No |
| 8945 | Apol7a   | 0.0000 | No |
| 8946 | Apol7b   | 0.0000 | No |
| 8947 | Apol7c   | 0.0000 | No |
| 8948 | Apol7d   | 0.0000 | No |
| 8949 | Apol8    | 0.0000 | No |
| 8950 | Apol9b   | 0.0000 | No |
| 8951 | Apold1   | 0.0000 | No |
| 8952 | Apom     | 0.0000 | No |
| 8953 | Apon     | 0.0000 | No |
| 8954 | Apoo     | 0.0000 | No |
| 8955 | Apool    | 0.0000 | No |
| 8956 | Apoo-ps  | 0.0000 | No |
| 8957 | Apopt1   | 0.0000 | No |
| 8958 | App      | 0.0000 | No |
| 8959 | Appbp2   | 0.0000 | No |
| 8960 | Appbp2os | 0.0000 | No |
| 8961 | Appl1    | 0.0000 | No |
| 8962 | Appl2    | 0.0000 | No |
| 8963 | Aprt     | 0.0000 | No |
| 8964 | Aptx     | 0.0000 | No |
| 8965 | Aqp10-ps | 0.0000 | No |
| 8966 | Aqp11    | 0.0000 | No |
| 8967 | Aqp12    | 0.0000 | No |

|      |            |        |    |
|------|------------|--------|----|
| 8968 | Aqp2       | 0.0000 | No |
| 8969 | Aqp3       | 0.0000 | No |
| 8970 | Aqp4       | 0.0000 | No |
| 8971 | Aqp5       | 0.0000 | No |
| 8972 | Aqp6       | 0.0000 | No |
| 8973 | Aqp7       | 0.0000 | No |
| 8974 | Aqp8       | 0.0000 | No |
| 8975 | Aqp9       | 0.0000 | No |
| 8976 | Aqr        | 0.0000 | No |
| 8977 | Araf       | 0.0000 | No |
| 8978 | Arap2      | 0.0000 | No |
| 8979 | Arc        | 0.0000 | No |
| 8980 | Arcn1      | 0.0000 | No |
| 8981 | Areg       | 0.0000 | No |
| 8982 | Arel1      | 0.0000 | No |
| 8983 | Arf1       | 0.0000 | No |
| 8984 | Arf2       | 0.0000 | No |
| 8985 | Arf4       | 0.0000 | No |
| 8986 | Arf4os     | 0.0000 | No |
| 8987 | Arf5       | 0.0000 | No |
| 8988 | Arf6       | 0.0000 | No |
| 8989 | Arfgap1    | 0.0000 | No |
| 8990 | Arfgap2    | 0.0000 | No |
| 8991 | Arfgap3    | 0.0000 | No |
| 8992 | Arfgef1    | 0.0000 | No |
| 8993 | Arfgef2    | 0.0000 | No |
| 8994 | Arfgef3    | 0.0000 | No |
| 8995 | Arfip1     | 0.0000 | No |
| 8996 | Arfip2     | 0.0000 | No |
| 8997 | Arfrp1     | 0.0000 | No |
| 8998 | Arg1       | 0.0000 | No |
| 8999 | Arg2       | 0.0000 | No |
| 9000 | Arglu1     | 0.0000 | No |
| 9001 | Arhgap1    | 0.0000 | No |
| 9002 | Arhgap11a  | 0.0000 | No |
| 9003 | Arhgap12   | 0.0000 | No |
| 9004 | Arhgap15   | 0.0000 | No |
| 9005 | Arhgap15os | 0.0000 | No |
| 9006 | Arhgap19   | 0.0000 | No |
| 9007 | Arhgap20   | 0.0000 | No |
| 9008 | Arhgap20os | 0.0000 | No |
| 9009 | Arhgap22   | 0.0000 | No |
| 9010 | Arhgap23   | 0.0000 | No |
| 9011 | Arhgap24   | 0.0000 | No |
| 9012 | Arhgap25   | 0.0000 | No |
| 9013 | Arhgap26   | 0.0000 | No |

|      |             |        |    |
|------|-------------|--------|----|
| 9014 | Arhgap27    | 0.0000 | No |
| 9015 | Arhgap27os1 | 0.0000 | No |
| 9016 | Arhgap27os2 | 0.0000 | No |
| 9017 | Arhgap27os3 | 0.0000 | No |
| 9018 | Arhgap28    | 0.0000 | No |
| 9019 | Arhgap29    | 0.0000 | No |
| 9020 | Arhgap31    | 0.0000 | No |
| 9021 | Arhgap32    | 0.0000 | No |
| 9022 | Arhgap33    | 0.0000 | No |
| 9023 | Arhgap33os  | 0.0000 | No |
| 9024 | Arhgap35    | 0.0000 | No |
| 9025 | Arhgap36    | 0.0000 | No |
| 9026 | Arhgap39    | 0.0000 | No |
| 9027 | Arhgap4     | 0.0000 | No |
| 9028 | Arhgap40    | 0.0000 | No |
| 9029 | Arhgap42    | 0.0000 | No |
| 9030 | Arhgap44    | 0.0000 | No |
| 9031 | Arhgap6     | 0.0000 | No |
| 9032 | Arhgap8     | 0.0000 | No |
| 9033 | Arhgap9     | 0.0000 | No |
| 9034 | Arhgdia     | 0.0000 | No |
| 9035 | Arhgdib     | 0.0000 | No |
| 9036 | Arhgdig     | 0.0000 | No |
| 9037 | Arhgef1     | 0.0000 | No |
| 9038 | Arhgef10l   | 0.0000 | No |
| 9039 | Arhgef11    | 0.0000 | No |
| 9040 | Arhgef12    | 0.0000 | No |
| 9041 | Arhgef15    | 0.0000 | No |
| 9042 | Arhgef17    | 0.0000 | No |
| 9043 | Arhgef18    | 0.0000 | No |
| 9044 | Arhgef2     | 0.0000 | No |
| 9045 | Arhgef25    | 0.0000 | No |
| 9046 | Arhgef26    | 0.0000 | No |
| 9047 | Arhgef28    | 0.0000 | No |
| 9048 | Arhgef3     | 0.0000 | No |
| 9049 | Arhgef33    | 0.0000 | No |
| 9050 | Arhgef37    | 0.0000 | No |
| 9051 | Arhgef38    | 0.0000 | No |
| 9052 | Arhgef39    | 0.0000 | No |
| 9053 | Arhgef4     | 0.0000 | No |
| 9054 | Arhgef40    | 0.0000 | No |
| 9055 | Arhgef6     | 0.0000 | No |
| 9056 | Arhgef7     | 0.0000 | No |
| 9057 | Arhgef9     | 0.0000 | No |
| 9058 | Arid1a      | 0.0000 | No |
| 9059 | Arid1b      | 0.0000 | No |

|      |          |        |    |
|------|----------|--------|----|
| 9060 | Arid2    | 0.0000 | No |
| 9061 | Arid3a   | 0.0000 | No |
| 9062 | Arid3b   | 0.0000 | No |
| 9063 | Arid4a   | 0.0000 | No |
| 9064 | Arid4b   | 0.0000 | No |
| 9065 | Arid5a   | 0.0000 | No |
| 9066 | Arid5b   | 0.0000 | No |
| 9067 | Arih1    | 0.0000 | No |
| 9068 | Arih2    | 0.0000 | No |
| 9069 | Arl1     | 0.0000 | No |
| 9070 | Arl10    | 0.0000 | No |
| 9071 | Arl13a   | 0.0000 | No |
| 9072 | Arl13b   | 0.0000 | No |
| 9073 | Arl14ep  | 0.0000 | No |
| 9074 | Arl14ep1 | 0.0000 | No |
| 9075 | Arl15    | 0.0000 | No |
| 9076 | Arl16    | 0.0000 | No |
| 9077 | Arl2     | 0.0000 | No |
| 9078 | Arl2bp   | 0.0000 | No |
| 9079 | Arl3     | 0.0000 | No |
| 9080 | Arl4a    | 0.0000 | No |
| 9081 | Arl4c    | 0.0000 | No |
| 9082 | Arl4d    | 0.0000 | No |
| 9083 | Arl5a    | 0.0000 | No |
| 9084 | Arl5b    | 0.0000 | No |
| 9085 | Arl5c    | 0.0000 | No |
| 9086 | Arl6     | 0.0000 | No |
| 9087 | Arl6ip1  | 0.0000 | No |
| 9088 | Arl6ip4  | 0.0000 | No |
| 9089 | Arl6ip5  | 0.0000 | No |
| 9090 | Arl6ip6  | 0.0000 | No |
| 9091 | Arl8a    | 0.0000 | No |
| 9092 | Arl8b    | 0.0000 | No |
| 9093 | Arl9     | 0.0000 | No |
| 9094 | Armc1    | 0.0000 | No |
| 9095 | Armc10   | 0.0000 | No |
| 9096 | Armc2    | 0.0000 | No |
| 9097 | Armc3    | 0.0000 | No |
| 9098 | Armc4    | 0.0000 | No |
| 9099 | Armc5    | 0.0000 | No |
| 9100 | Armc6    | 0.0000 | No |
| 9101 | Armc7    | 0.0000 | No |
| 9102 | Armc8    | 0.0000 | No |
| 9103 | Armc9    | 0.0000 | No |
| 9104 | Armex1   | 0.0000 | No |
| 9105 | Armex3   | 0.0000 | No |

|      |          |        |    |
|------|----------|--------|----|
| 9106 | Armex4   | 0.0000 | No |
| 9107 | Armex5   | 0.0000 | No |
| 9108 | Armex6   | 0.0000 | No |
| 9109 | Armt1    | 0.0000 | No |
| 9110 | Arnt     | 0.0000 | No |
| 9111 | Arnt2    | 0.0000 | No |
| 9112 | Arntl    | 0.0000 | No |
| 9113 | Arntl2   | 0.0000 | No |
| 9114 | Arpc1a   | 0.0000 | No |
| 9115 | Arpc1b   | 0.0000 | No |
| 9116 | Arpc2    | 0.0000 | No |
| 9117 | Arpc3    | 0.0000 | No |
| 9118 | Arpc4    | 0.0000 | No |
| 9119 | Arpc5    | 0.0000 | No |
| 9120 | Arpc5l   | 0.0000 | No |
| 9121 | Arpp19   | 0.0000 | No |
| 9122 | Arpp21   | 0.0000 | No |
| 9123 | Arr3     | 0.0000 | No |
| 9124 | Arrb1    | 0.0000 | No |
| 9125 | Arrb2    | 0.0000 | No |
| 9126 | Arrdc1   | 0.0000 | No |
| 9127 | Arrdc2   | 0.0000 | No |
| 9128 | Arrdc3   | 0.0000 | No |
| 9129 | Arsa     | 0.0000 | No |
| 9130 | Arsb     | 0.0000 | No |
| 9131 | Arg      | 0.0000 | No |
| 9132 | Arsi     | 0.0000 | No |
| 9133 | Arsj     | 0.0000 | No |
| 9134 | Arsk     | 0.0000 | No |
| 9135 | Art1     | 0.0000 | No |
| 9136 | Art2a-ps | 0.0000 | No |
| 9137 | Art2b    | 0.0000 | No |
| 9138 | Art3     | 0.0000 | No |
| 9139 | Art5     | 0.0000 | No |
| 9140 | Artn     | 0.0000 | No |
| 9141 | Arv1     | 0.0000 | No |
| 9142 | Arx      | 0.0000 | No |
| 9143 | Arxes1   | 0.0000 | No |
| 9144 | As3mt    | 0.0000 | No |
| 9145 | Asah1    | 0.0000 | No |
| 9146 | Asah2    | 0.0000 | No |
| 9147 | Asap1    | 0.0000 | No |
| 9148 | Asap2    | 0.0000 | No |
| 9149 | Asap3    | 0.0000 | No |
| 9150 | Asb1     | 0.0000 | No |
| 9151 | Asb10    | 0.0000 | No |

|      |         |        |    |
|------|---------|--------|----|
| 9152 | Asb11   | 0.0000 | No |
| 9153 | Asb12   | 0.0000 | No |
| 9154 | Asb13   | 0.0000 | No |
| 9155 | Asb14   | 0.0000 | No |
| 9156 | Asb15   | 0.0000 | No |
| 9157 | Asb16   | 0.0000 | No |
| 9158 | Asb17   | 0.0000 | No |
| 9159 | Asb17os | 0.0000 | No |
| 9160 | Asb18   | 0.0000 | No |
| 9161 | Asb2    | 0.0000 | No |
| 9162 | Asb4    | 0.0000 | No |
| 9163 | Asb5    | 0.0000 | No |
| 9164 | Asb6    | 0.0000 | No |
| 9165 | Asb7    | 0.0000 | No |
| 9166 | Asb8    | 0.0000 | No |
| 9167 | Asb9    | 0.0000 | No |
| 9168 | Ascc1   | 0.0000 | No |
| 9169 | Ascc2   | 0.0000 | No |
| 9170 | Ascc3   | 0.0000 | No |
| 9171 | Ascl1   | 0.0000 | No |
| 9172 | Ascl3   | 0.0000 | No |
| 9173 | Ascl4   | 0.0000 | No |
| 9174 | Ascl5   | 0.0000 | No |
| 9175 | Asf1a   | 0.0000 | No |
| 9176 | Asf1b   | 0.0000 | No |
| 9177 | Asgr2   | 0.0000 | No |
| 9178 | Ash11   | 0.0000 | No |
| 9179 | Ash21   | 0.0000 | No |
| 9180 | Asic1   | 0.0000 | No |
| 9181 | Asic2   | 0.0000 | No |
| 9182 | Asic3   | 0.0000 | No |
| 9183 | Asic4   | 0.0000 | No |
| 9184 | Asic5   | 0.0000 | No |
| 9185 | Asl     | 0.0000 | No |
| 9186 | Asmt    | 0.0000 | No |
| 9187 | Asna1   | 0.0000 | No |
| 9188 | Asns    | 0.0000 | No |
| 9189 | Asnsd1  | 0.0000 | No |
| 9190 | Aspa    | 0.0000 | No |
| 9191 | Aspdh   | 0.0000 | No |
| 9192 | Aspg    | 0.0000 | No |
| 9193 | Asph    | 0.0000 | No |
| 9194 | Asphd1  | 0.0000 | No |
| 9195 | Asphd2  | 0.0000 | No |
| 9196 | Aspm    | 0.0000 | No |
| 9197 | Aspn    | 0.0000 | No |



|      |          |        |    |
|------|----------|--------|----|
| 9198 | Asprv1   | 0.0000 | No |
| 9199 | Aspscr1  | 0.0000 | No |
| 9200 | Asrgl1   | 0.0000 | No |
| 9201 | Aste1    | 0.0000 | No |
| 9202 | Astl     | 0.0000 | No |
| 9203 | Astn1    | 0.0000 | No |
| 9204 | Astn2    | 0.0000 | No |
| 9205 | Astx1a   | 0.0000 | No |
| 9206 | Astx1b   | 0.0000 | No |
| 9207 | Astx1c   | 0.0000 | No |
| 9208 | Astx2    | 0.0000 | No |
| 9209 | Astx3    | 0.0000 | No |
| 9210 | Astx4a   | 0.0000 | No |
| 9211 | Astx4b   | 0.0000 | No |
| 9212 | Astx4c   | 0.0000 | No |
| 9213 | Astx4d   | 0.0000 | No |
| 9214 | Astx5    | 0.0000 | No |
| 9215 | Astx6    | 0.0000 | No |
| 9216 | Asun     | 0.0000 | No |
| 9217 | Asxl2    | 0.0000 | No |
| 9218 | Asxl3    | 0.0000 | No |
| 9219 | Asz1     | 0.0000 | No |
| 9220 | Atad1    | 0.0000 | No |
| 9221 | Atad2    | 0.0000 | No |
| 9222 | Atad2b   | 0.0000 | No |
| 9223 | Atad3a   | 0.0000 | No |
| 9224 | Atad3aos | 0.0000 | No |
| 9225 | Atad5    | 0.0000 | No |
| 9226 | Atat1    | 0.0000 | No |
| 9227 | Atcay    | 0.0000 | No |
| 9228 | Atcayos  | 0.0000 | No |
| 9229 | Ate1     | 0.0000 | No |
| 9230 | Atf1     | 0.0000 | No |
| 9231 | Atf2     | 0.0000 | No |
| 9232 | Atf4     | 0.0000 | No |
| 9233 | Atf5     | 0.0000 | No |
| 9234 | Atf6     | 0.0000 | No |
| 9235 | Atf6b    | 0.0000 | No |
| 9236 | Atf7     | 0.0000 | No |
| 9237 | Atf7ip2  | 0.0000 | No |
| 9238 | Atg101   | 0.0000 | No |
| 9239 | Atg12    | 0.0000 | No |
| 9240 | Atg13    | 0.0000 | No |
| 9241 | Atg14    | 0.0000 | No |
| 9242 | Atg16l1  | 0.0000 | No |
| 9243 | Atg2b    | 0.0000 | No |

|      |          |        |    |
|------|----------|--------|----|
| 9244 | Atg3     | 0.0000 | No |
| 9245 | Atg4a    | 0.0000 | No |
| 9246 | Atg4a-ps | 0.0000 | No |
| 9247 | Atg4b    | 0.0000 | No |
| 9248 | Atg4c    | 0.0000 | No |
| 9249 | Atg4d    | 0.0000 | No |
| 9250 | Atg5     | 0.0000 | No |
| 9251 | Atg7     | 0.0000 | No |
| 9252 | Atg9a    | 0.0000 | No |
| 9253 | Atg9b    | 0.0000 | No |
| 9254 | Atic     | 0.0000 | No |
| 9255 | Atl1     | 0.0000 | No |
| 9256 | Atl2     | 0.0000 | No |
| 9257 | Atl3     | 0.0000 | No |
| 9258 | Atm      | 0.0000 | No |
| 9259 | Atmin    | 0.0000 | No |
| 9260 | Atn1     | 0.0000 | No |
| 9261 | Atoh1    | 0.0000 | No |
| 9262 | Atoh8    | 0.0000 | No |
| 9263 | Atox1    | 0.0000 | No |
| 9264 | Atp10a   | 0.0000 | No |
| 9265 | Atp10b   | 0.0000 | No |
| 9266 | Atp10d   | 0.0000 | No |
| 9267 | Atp11a   | 0.0000 | No |
| 9268 | Atp11b   | 0.0000 | No |
| 9269 | Atp11c   | 0.0000 | No |
| 9270 | Atp12a   | 0.0000 | No |
| 9271 | Atp13a1  | 0.0000 | No |
| 9272 | Atp13a2  | 0.0000 | No |
| 9273 | Atp13a3  | 0.0000 | No |
| 9274 | Atp13a4  | 0.0000 | No |
| 9275 | Atp13a5  | 0.0000 | No |
| 9276 | Atp1a1   | 0.0000 | No |
| 9277 | Atp1a2   | 0.0000 | No |
| 9278 | Atp1a3   | 0.0000 | No |
| 9279 | Atp1a4   | 0.0000 | No |
| 9280 | Atp1b1   | 0.0000 | No |
| 9281 | Atp1b2   | 0.0000 | No |
| 9282 | Atp1b3   | 0.0000 | No |
| 9283 | Atp1b4   | 0.0000 | No |
| 9284 | Atp2a1   | 0.0000 | No |
| 9285 | Atp2a2   | 0.0000 | No |
| 9286 | Atp2b1   | 0.0000 | No |
| 9287 | Atp2b2   | 0.0000 | No |
| 9288 | Atp2b3   | 0.0000 | No |
| 9289 | Atp2b4   | 0.0000 | No |

|      |             |        |    |
|------|-------------|--------|----|
| 9290 | Atp2c1      | 0.0000 | No |
| 9291 | Atp2c2      | 0.0000 | No |
| 9292 | Atp4a       | 0.0000 | No |
| 9293 | Atp4b       | 0.0000 | No |
| 9294 | Atp5a1      | 0.0000 | No |
| 9295 | Atp5b       | 0.0000 | No |
| 9296 | Atp5d       | 0.0000 | No |
| 9297 | Atp5e       | 0.0000 | No |
| 9298 | Atp5f1      | 0.0000 | No |
| 9299 | Atp5g1      | 0.0000 | No |
| 9300 | Atp5g2      | 0.0000 | No |
| 9301 | Atp5g3      | 0.0000 | No |
| 9302 | Atp5h       | 0.0000 | No |
| 9303 | Atp5j       | 0.0000 | No |
| 9304 | Atp5j2      | 0.0000 | No |
| 9305 | Atp5k       | 0.0000 | No |
| 9306 | Atp5l       | 0.0000 | No |
| 9307 | Atp5l2-ps   | 0.0000 | No |
| 9308 | Atp5l-ps1   | 0.0000 | No |
| 9309 | Atp5l-ps2   | 0.0000 | No |
| 9310 | Atp5o       | 0.0000 | No |
| 9311 | Atp5s       | 0.0000 | No |
| 9312 | Atp5sl      | 0.0000 | No |
| 9313 | Atp6ap1     | 0.0000 | No |
| 9314 | Atp6ap1l    | 0.0000 | No |
| 9315 | Atp6ap2     | 0.0000 | No |
| 9316 | Atp6v0a2    | 0.0000 | No |
| 9317 | Atp6v0a4    | 0.0000 | No |
| 9318 | Atp6v0b     | 0.0000 | No |
| 9319 | Atp6v0c     | 0.0000 | No |
| 9320 | Atp6v0c-ps1 | 0.0000 | No |
| 9321 | Atp6v0d1    | 0.0000 | No |
| 9322 | Atp6v0d2    | 0.0000 | No |
| 9323 | Atp6v0e     | 0.0000 | No |
| 9324 | Atp6v0e2    | 0.0000 | No |
| 9325 | Atp6v1a     | 0.0000 | No |
| 9326 | Atp6v1b2    | 0.0000 | No |
| 9327 | Atp6v1c1    | 0.0000 | No |
| 9328 | Atp6v1c2    | 0.0000 | No |
| 9329 | Atp6v1d     | 0.0000 | No |
| 9330 | Atp6v1e1    | 0.0000 | No |
| 9331 | Atp6v1e2    | 0.0000 | No |
| 9332 | Atp6v1f     | 0.0000 | No |
| 9333 | Atp6v1g1    | 0.0000 | No |
| 9334 | Atp6v1g2    | 0.0000 | No |
| 9335 | Atp6v1g3    | 0.0000 | No |

|      |            |        |    |
|------|------------|--------|----|
| 9336 | Atp6v1h    | 0.0000 | No |
| 9337 | Atp7a      | 0.0000 | No |
| 9338 | Atp7b      | 0.0000 | No |
| 9339 | Atp8a1     | 0.0000 | No |
| 9340 | Atp8a2     | 0.0000 | No |
| 9341 | Atp8b1     | 0.0000 | No |
| 9342 | Atp8b2     | 0.0000 | No |
| 9343 | Atp8b3     | 0.0000 | No |
| 9344 | Atp8b4     | 0.0000 | No |
| 9345 | Atp8b5     | 0.0000 | No |
| 9346 | Atp9a      | 0.0000 | No |
| 9347 | Atp9b      | 0.0000 | No |
| 9348 | Atpaf1     | 0.0000 | No |
| 9349 | Atpaf2     | 0.0000 | No |
| 9350 | Atpif1     | 0.0000 | No |
| 9351 | Atr        | 0.0000 | No |
| 9352 | Atraid     | 0.0000 | No |
| 9353 | Atrip      | 0.0000 | No |
| 9354 | Atrn       | 0.0000 | No |
| 9355 | Atrnl1     | 0.0000 | No |
| 9356 | Atrx       | 0.0000 | No |
| 9357 | Atxn1      | 0.0000 | No |
| 9358 | Atxn10     | 0.0000 | No |
| 9359 | Atxn11     | 0.0000 | No |
| 9360 | Atxn2      | 0.0000 | No |
| 9361 | Atxn2l     | 0.0000 | No |
| 9362 | Atxn3      | 0.0000 | No |
| 9363 | Atxn7      | 0.0000 | No |
| 9364 | Atxn7l1    | 0.0000 | No |
| 9365 | Atxn7l1os1 | 0.0000 | No |
| 9366 | Atxn7l1os2 | 0.0000 | No |
| 9367 | Atxn7l2    | 0.0000 | No |
| 9368 | Atxn7l3    | 0.0000 | No |
| 9369 | Atxn7l3b   | 0.0000 | No |
| 9370 | AU015228   | 0.0000 | No |
| 9371 | AU015336   | 0.0000 | No |
| 9372 | AU015836   | 0.0000 | No |
| 9373 | AU016765   | 0.0000 | No |
| 9374 | AU018091   | 0.0000 | No |
| 9375 | AU019823   | 0.0000 | No |
| 9376 | AU019990   | 0.0000 | No |
| 9377 | AU020206   | 0.0000 | No |
| 9378 | AU022252   | 0.0000 | No |
| 9379 | AU022751   | 0.0000 | No |
| 9380 | AU022754   | 0.0000 | No |
| 9381 | AU023762   | 0.0000 | No |

|      |          |        |    |
|------|----------|--------|----|
| 9382 | AU040320 | 0.0000 | No |
| 9383 | AU040972 | 0.0000 | No |
| 9384 | AU041133 | 0.0000 | No |
| 9385 | Auh      | 0.0000 | No |
| 9386 | Aunip    | 0.0000 | No |
| 9387 | Aup1     | 0.0000 | No |
| 9388 | Aurka    | 0.0000 | No |
| 9389 | Aurkaip1 | 0.0000 | No |
| 9390 | Aurkb    | 0.0000 | No |
| 9391 | Auts2    | 0.0000 | No |
| 9392 | AV026068 | 0.0000 | No |
| 9393 | AV039307 | 0.0000 | No |
| 9394 | AV064505 | 0.0000 | No |
| 9395 | AV099323 | 0.0000 | No |
| 9396 | AV320801 | 0.0000 | No |
| 9397 | Aven     | 0.0000 | No |
| 9398 | Avl9     | 0.0000 | No |
| 9399 | Avp      | 0.0000 | No |
| 9400 | Avpi1    | 0.0000 | No |
| 9401 | Avpr1a   | 0.0000 | No |
| 9402 | Avpr1b   | 0.0000 | No |
| 9403 | Avpr2    | 0.0000 | No |
| 9404 | AW011738 | 0.0000 | No |
| 9405 | AW046200 | 0.0000 | No |
| 9406 | AW112010 | 0.0000 | No |
| 9407 | AW121686 | 0.0000 | No |
| 9408 | AW146154 | 0.0000 | No |
| 9409 | AW209491 | 0.0000 | No |
| 9410 | AW495222 | 0.0000 | No |
| 9411 | AW549877 | 0.0000 | No |
| 9412 | AW551984 | 0.0000 | No |
| 9413 | AW554918 | 0.0000 | No |
| 9414 | AW822073 | 0.0000 | No |
| 9415 | AW822252 | 0.0000 | No |
| 9416 | Awat1    | 0.0000 | No |
| 9417 | Awat2    | 0.0000 | No |
| 9418 | Axdnd1   | 0.0000 | No |
| 9419 | Axin1    | 0.0000 | No |
| 9420 | Axl      | 0.0000 | No |
| 9421 | AY036118 | 0.0000 | No |
| 9422 | AY074887 | 0.0000 | No |
| 9423 | AY358078 | 0.0000 | No |
| 9424 | AY512915 | 0.0000 | No |
| 9425 | AY512931 | 0.0000 | No |
| 9426 | AY702102 | 0.0000 | No |
| 9427 | AY702103 | 0.0000 | No |

|      |               |        |    |
|------|---------------|--------|----|
| 9428 | AY761185      | 0.0000 | No |
| 9429 | Aym1          | 0.0000 | No |
| 9430 | Azgp1         | 0.0000 | No |
| 9431 | Azi2          | 0.0000 | No |
| 9432 | Azin1         | 0.0000 | No |
| 9433 | Azin2         | 0.0000 | No |
| 9434 | B020004J07Rik | 0.0000 | No |
| 9435 | B020011L13Rik | 0.0000 | No |
| 9436 | B020031H02Rik | 0.0000 | No |
| 9437 | B130011K05Rik | 0.0000 | No |
| 9438 | B130021K23Rik | 0.0000 | No |
| 9439 | B130024G19Rik | 0.0000 | No |
| 9440 | B130034C11Rik | 0.0000 | No |
| 9441 | B130046B21Rik | 0.0000 | No |
| 9442 | B130055M24Rik | 0.0000 | No |
| 9443 | B230110C06Rik | 0.0000 | No |
| 9444 | B230110G15Rik | 0.0000 | No |
| 9445 | B230112G18Rik | 0.0000 | No |
| 9446 | B230112J18Rik | 0.0000 | No |
| 9447 | B230118H07Rik | 0.0000 | No |
| 9448 | B230119M05Rik | 0.0000 | No |
| 9449 | B230206H07Rik | 0.0000 | No |
| 9450 | B230206I08Rik | 0.0000 | No |
| 9451 | B230206L02Rik | 0.0000 | No |
| 9452 | B230207O21Rik | 0.0000 | No |
| 9453 | B230208B08Rik | 0.0000 | No |
| 9454 | B230208H11Rik | 0.0000 | No |
| 9455 | B230209E15Rik | 0.0000 | No |
| 9456 | B230216N24Rik | 0.0000 | No |
| 9457 | B230217C12Rik | 0.0000 | No |
| 9458 | B230217O12Rik | 0.0000 | No |
| 9459 | B230219D22Rik | 0.0000 | No |
| 9460 | B230303O12Rik | 0.0000 | No |
| 9461 | B230307C23Rik | 0.0000 | No |
| 9462 | B230311B06Rik | 0.0000 | No |
| 9463 | B230312C02Rik | 0.0000 | No |
| 9464 | B230317F23Rik | 0.0000 | No |
| 9465 | B230319C09Rik | 0.0000 | No |
| 9466 | B230322F03Rik | 0.0000 | No |
| 9467 | B230334C09Rik | 0.0000 | No |
| 9468 | B230344G16Rik | 0.0000 | No |
| 9469 | B230354K17Rik | 0.0000 | No |
| 9470 | B230359F08Rik | 0.0000 | No |
| 9471 | B230364G03Rik | 0.0000 | No |
| 9472 | B230369F24Rik | 0.0000 | No |
| 9473 | B230377A18Rik | 0.0000 | No |

|      |               |        |    |
|------|---------------|--------|----|
| 9474 | B230398E01Rik | 0.0000 | No |
| 9475 | B2m           | 0.0000 | No |
| 9476 | B330016D10Rik | 0.0000 | No |
| 9477 | B3galnt1      | 0.0000 | No |
| 9478 | B3galnt2      | 0.0000 | No |
| 9479 | B3galt1       | 0.0000 | No |
| 9480 | B3galt2       | 0.0000 | No |
| 9481 | B3galt4       | 0.0000 | No |
| 9482 | B3galt5       | 0.0000 | No |
| 9483 | B3galt6       | 0.0000 | No |
| 9484 | B3gat1        | 0.0000 | No |
| 9485 | B3gat2        | 0.0000 | No |
| 9486 | B3gat3        | 0.0000 | No |
| 9487 | B3glct        | 0.0000 | No |
| 9488 | B3gnt2        | 0.0000 | No |
| 9489 | B3gnt3        | 0.0000 | No |
| 9490 | B3gnt4        | 0.0000 | No |
| 9491 | B3gnt5        | 0.0000 | No |
| 9492 | B3gnt6        | 0.0000 | No |
| 9493 | B3gnt9        | 0.0000 | No |
| 9494 | B3gnt11       | 0.0000 | No |
| 9495 | B430010I23Rik | 0.0000 | No |
| 9496 | B430119L08Rik | 0.0000 | No |
| 9497 | B430212C06Rik | 0.0000 | No |
| 9498 | B430218F22Rik | 0.0000 | No |
| 9499 | B430305J03Rik | 0.0000 | No |
| 9500 | B430306N03Rik | 0.0000 | No |
| 9501 | B430319F04Rik | 0.0000 | No |
| 9502 | B430319H21Rik | 0.0000 | No |
| 9503 | B4galnt1      | 0.0000 | No |
| 9504 | B4galnt2      | 0.0000 | No |
| 9505 | B4galnt3      | 0.0000 | No |
| 9506 | B4galnt4      | 0.0000 | No |
| 9507 | B4galt1       | 0.0000 | No |
| 9508 | B4galt2       | 0.0000 | No |
| 9509 | B4galt3       | 0.0000 | No |
| 9510 | B4galt4       | 0.0000 | No |
| 9511 | B4galt5       | 0.0000 | No |
| 9512 | B4galt6       | 0.0000 | No |
| 9513 | B4galt7       | 0.0000 | No |
| 9514 | B4gat1        | 0.0000 | No |
| 9515 | B530045E10Rik | 0.0000 | No |
| 9516 | B630019A10Rik | 0.0000 | No |
| 9517 | B630019K06Rik | 0.0000 | No |
| 9518 | B830042I05Rik | 0.0000 | No |
| 9519 | B930025P03Rik | 0.0000 | No |

|      |               |        |    |
|------|---------------|--------|----|
| 9520 | B930036N10Rik | 0.0000 | No |
| 9521 | B930082K07Rik | 0.0000 | No |
| 9522 | B930086L07Rik | 0.0000 | No |
| 9523 | B930094E09Rik | 0.0000 | No |
| 9524 | B9d1          | 0.0000 | No |
| 9525 | B9d1os        | 0.0000 | No |
| 9526 | B9d2          | 0.0000 | No |
| 9527 | Baalc         | 0.0000 | No |
| 9528 | Baat          | 0.0000 | No |
| 9529 | Babam1        | 0.0000 | No |
| 9530 | Bace1         | 0.0000 | No |
| 9531 | Bace2         | 0.0000 | No |
| 9532 | Bach1         | 0.0000 | No |
| 9533 | Bach2         | 0.0000 | No |
| 9534 | Bach2it1      | 0.0000 | No |
| 9535 | Bach2os       | 0.0000 | No |
| 9536 | Bad           | 0.0000 | No |
| 9537 | Bag1          | 0.0000 | No |
| 9538 | Bag2          | 0.0000 | No |
| 9539 | Bag3          | 0.0000 | No |
| 9540 | Bag4          | 0.0000 | No |
| 9541 | Bag5          | 0.0000 | No |
| 9542 | Bag6          | 0.0000 | No |
| 9543 | Bahcc1        | 0.0000 | No |
| 9544 | Bahd1         | 0.0000 | No |
| 9545 | Baiap2        | 0.0000 | No |
| 9546 | Baiap2l1      | 0.0000 | No |
| 9547 | Baiap3        | 0.0000 | No |
| 9548 | Bak1          | 0.0000 | No |
| 9549 | Bambi         | 0.0000 | No |
| 9550 | Bambi-ps1     | 0.0000 | No |
| 9551 | Banf1         | 0.0000 | No |
| 9552 | Banf2         | 0.0000 | No |
| 9553 | Banf2os       | 0.0000 | No |
| 9554 | Bap1          | 0.0000 | No |
| 9555 | Bard1         | 0.0000 | No |
| 9556 | Barhl1        | 0.0000 | No |
| 9557 | Barhl2        | 0.0000 | No |
| 9558 | Barx1         | 0.0000 | No |
| 9559 | Barx2         | 0.0000 | No |
| 9560 | Batf          | 0.0000 | No |
| 9561 | Batf2         | 0.0000 | No |
| 9562 | Batf3         | 0.0000 | No |
| 9563 | Bax           | 0.0000 | No |
| 9564 | Baz1a         | 0.0000 | No |
| 9565 | Baz1b         | 0.0000 | No |



|      |          |        |    |
|------|----------|--------|----|
| 9566 | Baz2a    | 0.0000 | No |
| 9567 | Baz2b    | 0.0000 | No |
| 9568 | BB014433 | 0.0000 | No |
| 9569 | BB031773 | 0.0000 | No |
| 9570 | BB287469 | 0.0000 | No |
| 9571 | BB365896 | 0.0000 | No |
| 9572 | BB557941 | 0.0000 | No |
| 9573 | Bbc3     | 0.0000 | No |
| 9574 | Bbip1    | 0.0000 | No |
| 9575 | Bbof1    | 0.0000 | No |
| 9576 | Bbox1    | 0.0000 | No |
| 9577 | Bbs1     | 0.0000 | No |
| 9578 | Bbs10    | 0.0000 | No |
| 9579 | Bbs12    | 0.0000 | No |
| 9580 | Bbs2     | 0.0000 | No |
| 9581 | Bbs4     | 0.0000 | No |
| 9582 | Bbs5     | 0.0000 | No |
| 9583 | Bbs7     | 0.0000 | No |
| 9584 | Bbs9     | 0.0000 | No |
| 9585 | Bbx      | 0.0000 | No |
| 9586 | BC001981 | 0.0000 | No |
| 9587 | BC002059 | 0.0000 | No |
| 9588 | BC002163 | 0.0000 | No |
| 9589 | BC003331 | 0.0000 | No |
| 9590 | BC003965 | 0.0000 | No |
| 9591 | BC004004 | 0.0000 | No |
| 9592 | BC005537 | 0.0000 | No |
| 9593 | BC005561 | 0.0000 | No |
| 9594 | BC005624 | 0.0000 | No |
| 9595 | BC006965 | 0.0000 | No |
| 9596 | BC016579 | 0.0000 | No |
| 9597 | BC017158 | 0.0000 | No |
| 9598 | BC018473 | 0.0000 | No |
| 9599 | BC021767 | 0.0000 | No |
| 9600 | BC021891 | 0.0000 | No |
| 9601 | BC022687 | 0.0000 | No |
| 9602 | BC022960 | 0.0000 | No |
| 9603 | BC023105 | 0.0000 | No |
| 9604 | BC023719 | 0.0000 | No |
| 9605 | BC024139 | 0.0000 | No |
| 9606 | BC024386 | 0.0000 | No |
| 9607 | BC024978 | 0.0000 | No |
| 9608 | BC025446 | 0.0000 | No |
| 9609 | BC025920 | 0.0000 | No |
| 9610 | BC026585 | 0.0000 | No |
| 9611 | BC026762 | 0.0000 | No |

|      |          |        |    |
|------|----------|--------|----|
| 9612 | BC027072 | 0.0000 | No |
| 9613 | BC028471 | 0.0000 | No |
| 9614 | BC029214 | 0.0000 | No |
| 9615 | BC029722 | 0.0000 | No |
| 9616 | BC030336 | 0.0000 | No |
| 9617 | BC030343 | 0.0000 | No |
| 9618 | BC030499 | 0.0000 | No |
| 9619 | BC030500 | 0.0000 | No |
| 9620 | BC030867 | 0.0000 | No |
| 9621 | BC030870 | 0.0000 | No |
| 9622 | BC031181 | 0.0000 | No |
| 9623 | BC034090 | 0.0000 | No |
| 9624 | BC035044 | 0.0000 | No |
| 9625 | BC035947 | 0.0000 | No |
| 9626 | BC037032 | 0.0000 | No |
| 9627 | BC037039 | 0.0000 | No |
| 9628 | BC037156 | 0.0000 | No |
| 9629 | BC039771 | 0.0000 | No |
| 9630 | BC043934 | 0.0000 | No |
| 9631 | BC046251 | 0.0000 | No |
| 9632 | BC046401 | 0.0000 | No |
| 9633 | BC048403 | 0.0000 | No |
| 9634 | BC048502 | 0.0000 | No |
| 9635 | BC048507 | 0.0000 | No |
| 9636 | BC048546 | 0.0000 | No |
| 9637 | BC048559 | 0.0000 | No |
| 9638 | BC048562 | 0.0000 | No |
| 9639 | BC048644 | 0.0000 | No |
| 9640 | BC048671 | 0.0000 | No |
| 9641 | BC048679 | 0.0000 | No |
| 9642 | BC049352 | 0.0000 | No |
| 9643 | BC049702 | 0.0000 | No |
| 9644 | BC049715 | 0.0000 | No |
| 9645 | BC049730 | 0.0000 | No |
| 9646 | BC049739 | 0.0000 | No |
| 9647 | BC049762 | 0.0000 | No |
| 9648 | BC050972 | 0.0000 | No |
| 9649 | BC051019 | 0.0000 | No |
| 9650 | BC051077 | 0.0000 | No |
| 9651 | BC051142 | 0.0000 | No |
| 9652 | BC051226 | 0.0000 | No |
| 9653 | BC051537 | 0.0000 | No |
| 9654 | BC051628 | 0.0000 | No |
| 9655 | BC051665 | 0.0000 | No |
| 9656 | BC052040 | 0.0000 | No |
| 9657 | BC055308 | 0.0000 | No |

|      |          |        |    |
|------|----------|--------|----|
| 9658 | BC055324 | 0.0000 | No |
| 9659 | BC055402 | 0.0000 | No |
| 9660 | BC060293 | 0.0000 | No |
| 9661 | BC061195 | 0.0000 | No |
| 9662 | BC061212 | 0.0000 | No |
| 9663 | BC061237 | 0.0000 | No |
| 9664 | BC065397 | 0.0000 | No |
| 9665 | BC065403 | 0.0000 | No |
| 9666 | BC067074 | 0.0000 | No |
| 9667 | BC068281 | 0.0000 | No |
| 9668 | BC080695 | 0.0000 | No |
| 9669 | BC080696 | 0.0000 | No |
| 9670 | BC085271 | 0.0000 | No |
| 9671 | BC089597 | 0.0000 | No |
| 9672 | BC100530 | 0.0000 | No |
| 9673 | BC107364 | 0.0000 | No |
| 9674 | BC147527 | 0.0000 | No |
| 9675 | Bc1-ps1  | 0.0000 | No |
| 9676 | Bcam     | 0.0000 | No |
| 9677 | Bcap31   | 0.0000 | No |
| 9678 | Bcar1    | 0.0000 | No |
| 9679 | Bcas1    | 0.0000 | No |
| 9680 | Bcas1os1 | 0.0000 | No |
| 9681 | Bcas1os2 | 0.0000 | No |
| 9682 | Bcas2    | 0.0000 | No |
| 9683 | Bcas3    | 0.0000 | No |
| 9684 | Bcas3os1 | 0.0000 | No |
| 9685 | Bcas3os2 | 0.0000 | No |
| 9686 | Bcat1    | 0.0000 | No |
| 9687 | Bcat2    | 0.0000 | No |
| 9688 | Bccip    | 0.0000 | No |
| 9689 | Bcdin3d  | 0.0000 | No |
| 9690 | Bche     | 0.0000 | No |
| 9691 | Bckdha   | 0.0000 | No |
| 9692 | Bckdhb   | 0.0000 | No |
| 9693 | Bckdk    | 0.0000 | No |
| 9694 | Bcl10    | 0.0000 | No |
| 9695 | Bcl2     | 0.0000 | No |
| 9696 | Bcl2a1b  | 0.0000 | No |
| 9697 | Bcl2a1c  | 0.0000 | No |
| 9698 | Bcl2a1d  | 0.0000 | No |
| 9699 | Bcl2l1   | 0.0000 | No |
| 9700 | Bcl2l10  | 0.0000 | No |
| 9701 | Bcl2l11  | 0.0000 | No |
| 9702 | Bcl2l12  | 0.0000 | No |
| 9703 | Bcl2l13  | 0.0000 | No |

|      |          |        |    |
|------|----------|--------|----|
| 9704 | Bcl2114  | 0.0000 | No |
| 9705 | Bcl2115  | 0.0000 | No |
| 9706 | Bcl212   | 0.0000 | No |
| 9707 | Bcl3     | 0.0000 | No |
| 9708 | Bcl6     | 0.0000 | No |
| 9709 | Bcl6b    | 0.0000 | No |
| 9710 | Bcl7a    | 0.0000 | No |
| 9711 | Bcl7b    | 0.0000 | No |
| 9712 | Bcl7c    | 0.0000 | No |
| 9713 | Bcl9     | 0.0000 | No |
| 9714 | Bcl9l    | 0.0000 | No |
| 9715 | Bclaf1   | 0.0000 | No |
| 9716 | Bco2     | 0.0000 | No |
| 9717 | Bcorl1   | 0.0000 | No |
| 9718 | Bcr      | 0.0000 | No |
| 9719 | Bcs11    | 0.0000 | No |
| 9720 | Bdh2     | 0.0000 | No |
| 9721 | Bdkrb1   | 0.0000 | No |
| 9722 | Bdnf     | 0.0000 | No |
| 9723 | Bdp1     | 0.0000 | No |
| 9724 | BE692007 | 0.0000 | No |
| 9725 | Bean1    | 0.0000 | No |
| 9726 | Becn1    | 0.0000 | No |
| 9727 | Begain   | 0.0000 | No |
| 9728 | Bend3    | 0.0000 | No |
| 9729 | Bend4    | 0.0000 | No |
| 9730 | Bend6    | 0.0000 | No |
| 9731 | Bend7    | 0.0000 | No |
| 9732 | Best1    | 0.0000 | No |
| 9733 | Best2    | 0.0000 | No |
| 9734 | Best3    | 0.0000 | No |
| 9735 | Best4-ps | 0.0000 | No |
| 9736 | Bet1     | 0.0000 | No |
| 9737 | Bet1l    | 0.0000 | No |
| 9738 | Bex1     | 0.0000 | No |
| 9739 | Bex2     | 0.0000 | No |
| 9740 | Bex3     | 0.0000 | No |
| 9741 | Bex4     | 0.0000 | No |
| 9742 | Bex6     | 0.0000 | No |
| 9743 | Bfar     | 0.0000 | No |
| 9744 | Bfsp1    | 0.0000 | No |
| 9745 | Bglap    | 0.0000 | No |
| 9746 | Bglap2   | 0.0000 | No |
| 9747 | Bgn      | 0.0000 | No |
| 9748 | Bhlha15  | 0.0000 | No |
| 9749 | Bhlhb9   | 0.0000 | No |

|      |            |        |    |
|------|------------|--------|----|
| 9750 | Bhlhe22    | 0.0000 | No |
| 9751 | Bhlhe23    | 0.0000 | No |
| 9752 | Bhlhe40    | 0.0000 | No |
| 9753 | Bhlhe41    | 0.0000 | No |
| 9754 | Bhmt       | 0.0000 | No |
| 9755 | Bhmt2      | 0.0000 | No |
| 9756 | Bhmt-ps1   | 0.0000 | No |
| 9757 | Bicc1      | 0.0000 | No |
| 9758 | Bicd2      | 0.0000 | No |
| 9759 | Bid        | 0.0000 | No |
| 9760 | Bik        | 0.0000 | No |
| 9761 | Bin1       | 0.0000 | No |
| 9762 | Bin2       | 0.0000 | No |
| 9763 | Bin3       | 0.0000 | No |
| 9764 | Birc2      | 0.0000 | No |
| 9765 | Birc3      | 0.0000 | No |
| 9766 | Birc5      | 0.0000 | No |
| 9767 | Birc6      | 0.0000 | No |
| 9768 | Bivm       | 0.0000 | No |
| 9769 | Blcap      | 0.0000 | No |
| 9770 | Blm        | 0.0000 | No |
| 9771 | Blmh       | 0.0000 | No |
| 9772 | Bloc1s1    | 0.0000 | No |
| 9773 | Bloc1s2    | 0.0000 | No |
| 9774 | Bloc1s2-ps | 0.0000 | No |
| 9775 | Bloc1s3    | 0.0000 | No |
| 9776 | Bloc1s4    | 0.0000 | No |
| 9777 | Bloc1s5    | 0.0000 | No |
| 9778 | Bloc1s6    | 0.0000 | No |
| 9779 | Bloc1s6os  | 0.0000 | No |
| 9780 | Bloodline  | 0.0000 | No |
| 9781 | Blvra      | 0.0000 | No |
| 9782 | Blzf1      | 0.0000 | No |
| 9783 | Bmf        | 0.0000 | No |
| 9784 | Bmi1       | 0.0000 | No |
| 9785 | Bmp1       | 0.0000 | No |
| 9786 | Bmp15      | 0.0000 | No |
| 9787 | Bmp2       | 0.0000 | No |
| 9788 | Bmp2k      | 0.0000 | No |
| 9789 | Bmp3       | 0.0000 | No |
| 9790 | Bmp4       | 0.0000 | No |
| 9791 | Bmp5       | 0.0000 | No |
| 9792 | Bmp6       | 0.0000 | No |
| 9793 | Bmp7       | 0.0000 | No |
| 9794 | Bmp8a      | 0.0000 | No |
| 9795 | Bmp8b      | 0.0000 | No |

|      |           |        |    |
|------|-----------|--------|----|
| 9796 | Bmper     | 0.0000 | No |
| 9797 | Bmpr1a    | 0.0000 | No |
| 9798 | Bmpr1b    | 0.0000 | No |
| 9799 | Bmpr2     | 0.0000 | No |
| 9800 | Bms1      | 0.0000 | No |
| 9801 | Bmt2      | 0.0000 | No |
| 9802 | Bmx       | 0.0000 | No |
| 9803 | Bmyc      | 0.0000 | No |
| 9804 | Bnc1      | 0.0000 | No |
| 9805 | Bnc2      | 0.0000 | No |
| 9806 | Bnip1     | 0.0000 | No |
| 9807 | Bnip2     | 0.0000 | No |
| 9808 | Bnip3     | 0.0000 | No |
| 9809 | Bnip3l    | 0.0000 | No |
| 9810 | Bnip3l-ps | 0.0000 | No |
| 9811 | Bnip1     | 0.0000 | No |
| 9812 | Boc       | 0.0000 | No |
| 9813 | Bod1      | 0.0000 | No |
| 9814 | Bod11     | 0.0000 | No |
| 9815 | Bok       | 0.0000 | No |
| 9816 | Bola1     | 0.0000 | No |
| 9817 | Bola2     | 0.0000 | No |
| 9818 | Bola3     | 0.0000 | No |
| 9819 | Boll      | 0.0000 | No |
| 9820 | Bop1      | 0.0000 | No |
| 9821 | Bora      | 0.0000 | No |
| 9822 | Borcs5    | 0.0000 | No |
| 9823 | Borcs6    | 0.0000 | No |
| 9824 | Borcs7    | 0.0000 | No |
| 9825 | Borcs8    | 0.0000 | No |
| 9826 | Bpgm      | 0.0000 | No |
| 9827 | Bph1      | 0.0000 | No |
| 9828 | Bpifa1    | 0.0000 | No |
| 9829 | Bpifa2    | 0.0000 | No |
| 9830 | Bpifa3    | 0.0000 | No |
| 9831 | Bpifa5    | 0.0000 | No |
| 9832 | Bpifa6    | 0.0000 | No |
| 9833 | Bpifb1    | 0.0000 | No |
| 9834 | Bpifb3    | 0.0000 | No |
| 9835 | Bpifb4    | 0.0000 | No |
| 9836 | Bpifb5    | 0.0000 | No |
| 9837 | Bpifb9a   | 0.0000 | No |
| 9838 | Bpifb9b   | 0.0000 | No |
| 9839 | Bpifc     | 0.0000 | No |
| 9840 | Bpnt1     | 0.0000 | No |
| 9841 | Bptf      | 0.0000 | No |

|      |          |        |    |
|------|----------|--------|----|
| 9842 | Braf     | 0.0000 | No |
| 9843 | Brap     | 0.0000 | No |
| 9844 | Brat1    | 0.0000 | No |
| 9845 | Brca1    | 0.0000 | No |
| 9846 | Brca2    | 0.0000 | No |
| 9847 | Brcc3    | 0.0000 | No |
| 9848 | Brd1     | 0.0000 | No |
| 9849 | Brd2     | 0.0000 | No |
| 9850 | Brd3     | 0.0000 | No |
| 9851 | Brd4     | 0.0000 | No |
| 9852 | Brd7     | 0.0000 | No |
| 9853 | Brd8     | 0.0000 | No |
| 9854 | Brd9     | 0.0000 | No |
| 9855 | Brdt     | 0.0000 | No |
| 9856 | Brf1     | 0.0000 | No |
| 9857 | Brf2     | 0.0000 | No |
| 9858 | Bri3     | 0.0000 | No |
| 9859 | Bri3bp   | 0.0000 | No |
| 9860 | Bricd5   | 0.0000 | No |
| 9861 | Brinp1   | 0.0000 | No |
| 9862 | Brinp2   | 0.0000 | No |
| 9863 | Brinp3   | 0.0000 | No |
| 9864 | Brip1    | 0.0000 | No |
| 9865 | Brip1os  | 0.0000 | No |
| 9866 | Brix1    | 0.0000 | No |
| 9867 | Brk1     | 0.0000 | No |
| 9868 | Brms1    | 0.0000 | No |
| 9869 | Brms1l   | 0.0000 | No |
| 9870 | Brox     | 0.0000 | No |
| 9871 | Brpf1    | 0.0000 | No |
| 9872 | Brpf3    | 0.0000 | No |
| 9873 | Brsk2    | 0.0000 | No |
| 9874 | Brwd1    | 0.0000 | No |
| 9875 | Brwd3    | 0.0000 | No |
| 9876 | Bscl2    | 0.0000 | No |
| 9877 | Bsdc1    | 0.0000 | No |
| 9878 | Bsg      | 0.0000 | No |
| 9879 | Bsn      | 0.0000 | No |
| 9880 | Bsnd     | 0.0000 | No |
| 9881 | Bsph1    | 0.0000 | No |
| 9882 | Bsph2    | 0.0000 | No |
| 9883 | Bsph2-ps | 0.0000 | No |
| 9884 | Bspry    | 0.0000 | No |
| 9885 | Bst1     | 0.0000 | No |
| 9886 | Bst2     | 0.0000 | No |
| 9887 | Bsx      | 0.0000 | No |

|      |            |        |    |
|------|------------|--------|----|
| 9888 | Btaf1      | 0.0000 | No |
| 9889 | Btbd1      | 0.0000 | No |
| 9890 | Btbd10     | 0.0000 | No |
| 9891 | Btbd11     | 0.0000 | No |
| 9892 | Btbd16     | 0.0000 | No |
| 9893 | Btbd17     | 0.0000 | No |
| 9894 | Btbd18     | 0.0000 | No |
| 9895 | Btbd19     | 0.0000 | No |
| 9896 | Btbd2      | 0.0000 | No |
| 9897 | Btbd3      | 0.0000 | No |
| 9898 | Btbd6      | 0.0000 | No |
| 9899 | Btbd7      | 0.0000 | No |
| 9900 | Btbd8      | 0.0000 | No |
| 9901 | Btbd9      | 0.0000 | No |
| 9902 | Btc        | 0.0000 | No |
| 9903 | Btd        | 0.0000 | No |
| 9904 | Btf3l4     | 0.0000 | No |
| 9905 | Btg1       | 0.0000 | No |
| 9906 | Btg1-ps1   | 0.0000 | No |
| 9907 | Btg1-ps2   | 0.0000 | No |
| 9908 | Btg2       | 0.0000 | No |
| 9909 | Btg3       | 0.0000 | No |
| 9910 | Btg4       | 0.0000 | No |
| 9911 | Btla       | 0.0000 | No |
| 9912 | Btn1a1     | 0.0000 | No |
| 9913 | Btn2a2     | 0.0000 | No |
| 9914 | Btnl1      | 0.0000 | No |
| 9915 | Btnl10     | 0.0000 | No |
| 9916 | Btnl2      | 0.0000 | No |
| 9917 | Btnl4      | 0.0000 | No |
| 9918 | Btnl6      | 0.0000 | No |
| 9919 | Btnl7-ps   | 0.0000 | No |
| 9920 | Btnl9      | 0.0000 | No |
| 9921 | Btrc       | 0.0000 | No |
| 9922 | Bub1       | 0.0000 | No |
| 9923 | Bub1b      | 0.0000 | No |
| 9924 | Bub3       | 0.0000 | No |
| 9925 | Bud13      | 0.0000 | No |
| 9926 | Bud31      | 0.0000 | No |
| 9927 | BX530055.1 | 0.0000 | No |
| 9928 | BX890553.1 | 0.0000 | No |
| 9929 | BX890553.2 | 0.0000 | No |
| 9930 | BX890553.3 | 0.0000 | No |
| 9931 | BX890553.4 | 0.0000 | No |
| 9932 | Bysl       | 0.0000 | No |
| 9933 | Bzrap1     | 0.0000 | No |



|      |               |        |    |
|------|---------------|--------|----|
| 9934 | Bzw1          | 0.0000 | No |
| 9935 | Bzw2          | 0.0000 | No |
| 9936 | C030005K06Rik | 0.0000 | No |
| 9937 | C030005K15Rik | 0.0000 | No |
| 9938 | C030013C21Rik | 0.0000 | No |
| 9939 | C030013D06Rik | 0.0000 | No |
| 9940 | C030014I23Rik | 0.0000 | No |
| 9941 | C030015A19Rik | 0.0000 | No |
| 9942 | C030015E24Rik | 0.0000 | No |
| 9943 | C030017D09Rik | 0.0000 | No |
| 9944 | C030017G13Rik | 0.0000 | No |
| 9945 | C030018K13Rik | 0.0000 | No |
| 9946 | C030027H14Rik | 0.0000 | No |
| 9947 | C030029H02Rik | 0.0000 | No |
| 9948 | C030032O16Rik | 0.0000 | No |
| 9949 | C030034I22Rik | 0.0000 | No |
| 9950 | C030037D09Rik | 0.0000 | No |
| 9951 | C030037F17Rik | 0.0000 | No |
| 9952 | C030038I04Rik | 0.0000 | No |
| 9953 | C030047K22Rik | 0.0000 | No |
| 9954 | C130013H08Rik | 0.0000 | No |
| 9955 | C130021I20Rik | 0.0000 | No |
| 9956 | C130026I21Rik | 0.0000 | No |
| 9957 | C130026L21Rik | 0.0000 | No |
| 9958 | C130032M10Rik | 0.0000 | No |
| 9959 | C130036L24Rik | 0.0000 | No |
| 9960 | C130046K22Rik | 0.0000 | No |
| 9961 | C130050O18Rik | 0.0000 | No |
| 9962 | C130060C02Rik | 0.0000 | No |
| 9963 | C130060K24Rik | 0.0000 | No |
| 9964 | C130071C03Rik | 0.0000 | No |
| 9965 | C130073E24Rik | 0.0000 | No |
| 9966 | C130074G19Rik | 0.0000 | No |
| 9967 | C130075A20Rik | 0.0000 | No |
| 9968 | C130079G13Rik | 0.0000 | No |
| 9969 | C130080G10Rik | 0.0000 | No |
| 9970 | C130083A15Rik | 0.0000 | No |
| 9971 | C130083M11Rik | 0.0000 | No |
| 9972 | C130089K02Rik | 0.0000 | No |
| 9973 | C130093G08Rik | 0.0000 | No |
| 9974 | C1d           | 0.0000 | No |
| 9975 | C1galt1       | 0.0000 | No |
| 9976 | C1galt1c1     | 0.0000 | No |
| 9977 | C1qa          | 0.0000 | No |
| 9978 | C1qb          | 0.0000 | No |
| 9979 | C1qbp         | 0.0000 | No |

|       |               |        |    |
|-------|---------------|--------|----|
| 9980  | C1qc          | 0.0000 | No |
| 9981  | C1ql1         | 0.0000 | No |
| 9982  | C1ql2         | 0.0000 | No |
| 9983  | C1ql4         | 0.0000 | No |
| 9984  | C1qtnf1       | 0.0000 | No |
| 9985  | C1qtnf2       | 0.0000 | No |
| 9986  | C1qtnf3       | 0.0000 | No |
| 9987  | C1qtnf4       | 0.0000 | No |
| 9988  | C1qtnf5       | 0.0000 | No |
| 9989  | C1qtnf6       | 0.0000 | No |
| 9990  | C1qtnf9       | 0.0000 | No |
| 9991  | C1ra          | 0.0000 | No |
| 9992  | C1rl          | 0.0000 | No |
| 9993  | C1s1          | 0.0000 | No |
| 9994  | C1s2          | 0.0000 | No |
| 9995  | C2            | 0.0000 | No |
| 9996  | C230012O17Rik | 0.0000 | No |
| 9997  | C230014O12Rik | 0.0000 | No |
| 9998  | C230024C17Rik | 0.0000 | No |
| 9999  | C230029F24Rik | 0.0000 | No |
| 10000 | C230031I18Rik | 0.0000 | No |
| 10001 | C230034O21Rik | 0.0000 | No |
| 10002 | C230035I16Rik | 0.0000 | No |
| 10003 | C230037L18Rik | 0.0000 | No |
| 10004 | C230038L03Rik | 0.0000 | No |
| 10005 | C230066G23Rik | 0.0000 | No |
| 10006 | C230071H17Rik | 0.0000 | No |
| 10007 | C230085N15Rik | 0.0000 | No |
| 10008 | C230088H06Rik | 0.0000 | No |
| 10009 | C230096K16Rik | 0.0000 | No |
| 10010 | C2cd2         | 0.0000 | No |
| 10011 | C2cd2l        | 0.0000 | No |
| 10012 | C2cd3         | 0.0000 | No |
| 10013 | C2cd4a        | 0.0000 | No |
| 10014 | C2cd4b        | 0.0000 | No |
| 10015 | C2cd4c        | 0.0000 | No |
| 10016 | C2cd4d        | 0.0000 | No |
| 10017 | C2cd5         | 0.0000 | No |
| 10018 | C330002G04Rik | 0.0000 | No |
| 10019 | C330006A16Rik | 0.0000 | No |
| 10020 | C330007P06Rik | 0.0000 | No |
| 10021 | C330011M18Rik | 0.0000 | No |
| 10022 | C330013E15Rik | 0.0000 | No |
| 10023 | C330018A13Rik | 0.0000 | No |
| 10024 | C330018D20Rik | 0.0000 | No |
| 10025 | C330021F23Rik | 0.0000 | No |

|       |               |        |    |
|-------|---------------|--------|----|
| 10026 | C330022C24Rik | 0.0000 | No |
| 10027 | C330024D21Rik | 0.0000 | No |
| 10028 | C330027C09Rik | 0.0000 | No |
| 10029 | C3ar1         | 0.0000 | No |
| 10030 | C430002N11Rik | 0.0000 | No |
| 10031 | C430014B12Rik | 0.0000 | No |
| 10032 | C430019N01Rik | 0.0000 | No |
| 10033 | C430039J01Rik | 0.0000 | No |
| 10034 | C430039J16Rik | 0.0000 | No |
| 10035 | C430042M11Rik | 0.0000 | No |
| 10036 | C430049E01Rik | 0.0000 | No |
| 10037 | C4a           | 0.0000 | No |
| 10038 | C4bp          | 0.0000 | No |
| 10039 | C4bp-ps1      | 0.0000 | No |
| 10040 | C530005A16Rik | 0.0000 | No |
| 10041 | C530008M17Rik | 0.0000 | No |
| 10042 | C530025M09Rik | 0.0000 | No |
| 10043 | C530043A13Rik | 0.0000 | No |
| 10044 | C530043K16Rik | 0.0000 | No |
| 10045 | C530050E15Rik | 0.0000 | No |
| 10046 | C5ar1         | 0.0000 | No |
| 10047 | C5ar2         | 0.0000 | No |
| 10048 | C6            | 0.0000 | No |
| 10049 | C630004L07Rik | 0.0000 | No |
| 10050 | C630004M23Rik | 0.0000 | No |
| 10051 | C630028M04Rik | 0.0000 | No |
| 10052 | C630043F03Rik | 0.0000 | No |
| 10053 | C630050I24Rik | 0.0000 | No |
| 10054 | C7            | 0.0000 | No |
| 10055 | C730034F03Rik | 0.0000 | No |
| 10056 | C730036E19Rik | 0.0000 | No |
| 10057 | C730045M19Rik | 0.0000 | No |
| 10058 | C77080        | 0.0000 | No |
| 10059 | C77370        | 0.0000 | No |
| 10060 | C78197        | 0.0000 | No |
| 10061 | C78283        | 0.0000 | No |
| 10062 | C78334        | 0.0000 | No |
| 10063 | C79130        | 0.0000 | No |
| 10064 | C79798        | 0.0000 | No |
| 10065 | C820005J03Rik | 0.0000 | No |
| 10066 | C86187        | 0.0000 | No |
| 10067 | C87414        | 0.0000 | No |
| 10068 | C87436        | 0.0000 | No |
| 10069 | C87499        | 0.0000 | No |
| 10070 | C87977        | 0.0000 | No |
| 10071 | C8a           | 0.0000 | No |

|       |                |        |    |
|-------|----------------|--------|----|
| 10072 | C8b            | 0.0000 | No |
| 10073 | C8g            | 0.0000 | No |
| 10074 | C9             | 0.0000 | No |
| 10075 | C920006O11Rik  | 0.0000 | No |
| 10076 | C920008G01Rik  | 0.0000 | No |
| 10077 | C920009B18Rik  | 0.0000 | No |
| 10078 | C920021L13Rik  | 0.0000 | No |
| 10079 | CAAA01000182.1 | 0.0000 | No |
| 10080 | CAAA01070179.1 | 0.0000 | No |
| 10081 | CAAA01070179.2 | 0.0000 | No |
| 10082 | CAAA01089676.1 | 0.0000 | No |
| 10083 | CAAA01090811.1 | 0.0000 | No |
| 10084 | CAAA01093158.1 | 0.0000 | No |
| 10085 | CAAA01093181.1 | 0.0000 | No |
| 10086 | CAAA01093181.2 | 0.0000 | No |
| 10087 | CAAA01096603.1 | 0.0000 | No |
| 10088 | CAAA01125382.2 | 0.0000 | No |
| 10089 | CAAA01125382.3 | 0.0000 | No |
| 10090 | CAAA01144662.1 | 0.0000 | No |
| 10091 | CAAA01144662.2 | 0.0000 | No |
| 10092 | CAAA01144662.3 | 0.0000 | No |
| 10093 | CAAA01147332.1 | 0.0000 | No |
| 10094 | CAAA01154301.1 | 0.0000 | No |
| 10095 | CAAA01165726.1 | 0.0000 | No |
| 10096 | CAAA01180111.1 | 0.0000 | No |
| 10097 | CAAA01180111.2 | 0.0000 | No |
| 10098 | CAAA01194877.2 | 0.0000 | No |
| 10099 | CAAA01205117.1 | 0.0000 | No |
| 10100 | CAAA01205117.2 | 0.0000 | No |
| 10101 | CAAA01216754.1 | 0.0000 | No |
| 10102 | CAAA01216754.2 | 0.0000 | No |
| 10103 | Caap1          | 0.0000 | No |
| 10104 | Cab39          | 0.0000 | No |
| 10105 | Cab39l         | 0.0000 | No |
| 10106 | Cables1        | 0.0000 | No |
| 10107 | Cables2        | 0.0000 | No |
| 10108 | Cabp2          | 0.0000 | No |
| 10109 | Cabp4          | 0.0000 | No |
| 10110 | Cabp7          | 0.0000 | No |
| 10111 | Cabs1          | 0.0000 | No |
| 10112 | Cabyr          | 0.0000 | No |
| 10113 | Cacfd1         | 0.0000 | No |
| 10114 | Cachd1         | 0.0000 | No |
| 10115 | Cacna1a        | 0.0000 | No |
| 10116 | Cacna1c        | 0.0000 | No |
| 10117 | Cacna1d        | 0.0000 | No |

|       |          |        |    |
|-------|----------|--------|----|
| 10118 | Cacna1e  | 0.0000 | No |
| 10119 | Cacna1f  | 0.0000 | No |
| 10120 | Cacna1g  | 0.0000 | No |
| 10121 | Cacna1h  | 0.0000 | No |
| 10122 | Cacna1i  | 0.0000 | No |
| 10123 | Cacna1s  | 0.0000 | No |
| 10124 | Cacna2d1 | 0.0000 | No |
| 10125 | Cacna2d2 | 0.0000 | No |
| 10126 | Cacna2d3 | 0.0000 | No |
| 10127 | Cacna2d4 | 0.0000 | No |
| 10128 | Cacnb1   | 0.0000 | No |
| 10129 | Cacnb2   | 0.0000 | No |
| 10130 | Cacnb4   | 0.0000 | No |
| 10131 | Cacng2   | 0.0000 | No |
| 10132 | Cacng3   | 0.0000 | No |
| 10133 | Cacng5   | 0.0000 | No |
| 10134 | Cacng6   | 0.0000 | No |
| 10135 | Cacng7   | 0.0000 | No |
| 10136 | Cacng8   | 0.0000 | No |
| 10137 | Cactin   | 0.0000 | No |
| 10138 | Cacul1   | 0.0000 | No |
| 10139 | Cacybp   | 0.0000 | No |
| 10140 | Cad      | 0.0000 | No |
| 10141 | Cadm1    | 0.0000 | No |
| 10142 | Cadm2    | 0.0000 | No |
| 10143 | Cadm3    | 0.0000 | No |
| 10144 | Cadm4    | 0.0000 | No |
| 10145 | Cadps    | 0.0000 | No |
| 10146 | Cadps2   | 0.0000 | No |
| 10147 | Cage1    | 0.0000 | No |
| 10148 | Calb1    | 0.0000 | No |
| 10149 | Calb2    | 0.0000 | No |
| 10150 | Calca    | 0.0000 | No |
| 10151 | Calcb    | 0.0000 | No |
| 10152 | Calcoc1  | 0.0000 | No |
| 10153 | Calcr    | 0.0000 | No |
| 10154 | Calcr1   | 0.0000 | No |
| 10155 | Cald1    | 0.0000 | No |
| 10156 | Calhm1   | 0.0000 | No |
| 10157 | Calhm2   | 0.0000 | No |
| 10158 | Calhm3   | 0.0000 | No |
| 10159 | Calm1    | 0.0000 | No |
| 10160 | Calm2    | 0.0000 | No |
| 10161 | Calm3    | 0.0000 | No |
| 10162 | Calm4    | 0.0000 | No |
| 10163 | Calml4   | 0.0000 | No |

|       |         |        |    |
|-------|---------|--------|----|
| 10164 | Caln1   | 0.0000 | No |
| 10165 | Calr    | 0.0000 | No |
| 10166 | Calr3   | 0.0000 | No |
| 10167 | Calr4   | 0.0000 | No |
| 10168 | Calr-ps | 0.0000 | No |
| 10169 | Calu    | 0.0000 | No |
| 10170 | Camk1   | 0.0000 | No |
| 10171 | Camk1d  | 0.0000 | No |
| 10172 | Camk1g  | 0.0000 | No |
| 10173 | Camk2a  | 0.0000 | No |
| 10174 | Camk2n2 | 0.0000 | No |
| 10175 | Camk4   | 0.0000 | No |
| 10176 | Camkk1  | 0.0000 | No |
| 10177 | Camkk2  | 0.0000 | No |
| 10178 | Camkmt  | 0.0000 | No |
| 10179 | Camkv   | 0.0000 | No |
| 10180 | Caml    | 0.0000 | No |
| 10181 | Camsap1 | 0.0000 | No |
| 10182 | Camsap2 | 0.0000 | No |
| 10183 | Camsap3 | 0.0000 | No |
| 10184 | Camta1  | 0.0000 | No |
| 10185 | Camta2  | 0.0000 | No |
| 10186 | Cand1   | 0.0000 | No |
| 10187 | Cand2   | 0.0000 | No |
| 10188 | Cant1   | 0.0000 | No |
| 10189 | Canx    | 0.0000 | No |
| 10190 | Cap1    | 0.0000 | No |
| 10191 | Cap2    | 0.0000 | No |
| 10192 | Capg    | 0.0000 | No |
| 10193 | Capn10  | 0.0000 | No |
| 10194 | Capn11  | 0.0000 | No |
| 10195 | Capn12  | 0.0000 | No |
| 10196 | Capn13  | 0.0000 | No |
| 10197 | Capn15  | 0.0000 | No |
| 10198 | Capn2   | 0.0000 | No |
| 10199 | Capn3   | 0.0000 | No |
| 10200 | Capn5   | 0.0000 | No |
| 10201 | Capn6   | 0.0000 | No |
| 10202 | Capn7   | 0.0000 | No |
| 10203 | Capn8   | 0.0000 | No |
| 10204 | Capn9   | 0.0000 | No |
| 10205 | Capns2  | 0.0000 | No |
| 10206 | Caprin1 | 0.0000 | No |
| 10207 | Caprin2 | 0.0000 | No |
| 10208 | Caps2   | 0.0000 | No |
| 10209 | Capsl   | 0.0000 | No |

|       |           |        |    |
|-------|-----------|--------|----|
| 10210 | Capza1    | 0.0000 | No |
| 10211 | Capza2    | 0.0000 | No |
| 10212 | Capzb     | 0.0000 | No |
| 10213 | Car1      | 0.0000 | No |
| 10214 | Car10     | 0.0000 | No |
| 10215 | Car11     | 0.0000 | No |
| 10216 | Car12     | 0.0000 | No |
| 10217 | Car13     | 0.0000 | No |
| 10218 | Car14     | 0.0000 | No |
| 10219 | Car15     | 0.0000 | No |
| 10220 | Car4      | 0.0000 | No |
| 10221 | Car5a     | 0.0000 | No |
| 10222 | Car5b     | 0.0000 | No |
| 10223 | Car6      | 0.0000 | No |
| 10224 | Car7      | 0.0000 | No |
| 10225 | Car8      | 0.0000 | No |
| 10226 | Car9      | 0.0000 | No |
| 10227 | Card10    | 0.0000 | No |
| 10228 | Card11    | 0.0000 | No |
| 10229 | Card14    | 0.0000 | No |
| 10230 | Card19    | 0.0000 | No |
| 10231 | Card6     | 0.0000 | No |
| 10232 | Card9     | 0.0000 | No |
| 10233 | Carf      | 0.0000 | No |
| 10234 | Carhsp1   | 0.0000 | No |
| 10235 | Carm1     | 0.0000 | No |
| 10236 | Carmil1   | 0.0000 | No |
| 10237 | Carmil2   | 0.0000 | No |
| 10238 | Carmil3   | 0.0000 | No |
| 10239 | Carnmt1   | 0.0000 | No |
| 10240 | Carns1    | 0.0000 | No |
| 10241 | Cars      | 0.0000 | No |
| 10242 | Cars2     | 0.0000 | No |
| 10243 | Cartpt    | 0.0000 | No |
| 10244 | Casc1     | 0.0000 | No |
| 10245 | Casc3     | 0.0000 | No |
| 10246 | Casc4     | 0.0000 | No |
| 10247 | Casd1     | 0.0000 | No |
| 10248 | Cask      | 0.0000 | No |
| 10249 | Caskin1   | 0.0000 | No |
| 10250 | Caskin2   | 0.0000 | No |
| 10251 | Casp1     | 0.0000 | No |
| 10252 | Casp12    | 0.0000 | No |
| 10253 | Casp14    | 0.0000 | No |
| 10254 | Casp16-ps | 0.0000 | No |
| 10255 | Casp2     | 0.0000 | No |

|       |             |        |    |
|-------|-------------|--------|----|
| 10256 | Casp3       | 0.0000 | No |
| 10257 | Casp4       | 0.0000 | No |
| 10258 | Casp6       | 0.0000 | No |
| 10259 | Casp7       | 0.0000 | No |
| 10260 | Casp8       | 0.0000 | No |
| 10261 | Casp8ap2    | 0.0000 | No |
| 10262 | Casq1       | 0.0000 | No |
| 10263 | Casq2       | 0.0000 | No |
| 10264 | Cass4       | 0.0000 | No |
| 10265 | Cast        | 0.0000 | No |
| 10266 | Cat         | 0.0000 | No |
| 10267 | Catip       | 0.0000 | No |
| 10268 | Catsper1    | 0.0000 | No |
| 10269 | Catsper2    | 0.0000 | No |
| 10270 | Catsper3    | 0.0000 | No |
| 10271 | Catsper4    | 0.0000 | No |
| 10272 | Catsperb    | 0.0000 | No |
| 10273 | Catsperg1   | 0.0000 | No |
| 10274 | Catsperg2   | 0.0000 | No |
| 10275 | Cav1        | 0.0000 | No |
| 10276 | Cav2        | 0.0000 | No |
| 10277 | Cbarp       | 0.0000 | No |
| 10278 | Cbfa2t2     | 0.0000 | No |
| 10279 | Cbfa2t2-ps1 | 0.0000 | No |
| 10280 | Cbfa2t3     | 0.0000 | No |
| 10281 | Cbfb        | 0.0000 | No |
| 10282 | Cbl         | 0.0000 | No |
| 10283 | Cblb        | 0.0000 | No |
| 10284 | Cblc        | 0.0000 | No |
| 10285 | Cbl11       | 0.0000 | No |
| 10286 | Cbln1       | 0.0000 | No |
| 10287 | Cbln2       | 0.0000 | No |
| 10288 | Cbln3       | 0.0000 | No |
| 10289 | Cbln4       | 0.0000 | No |
| 10290 | Cbr1        | 0.0000 | No |
| 10291 | Cbr3        | 0.0000 | No |
| 10292 | Cbr4        | 0.0000 | No |
| 10293 | Cbs         | 0.0000 | No |
| 10294 | Cbwd1       | 0.0000 | No |
| 10295 | Cbx1        | 0.0000 | No |
| 10296 | Cbx2        | 0.0000 | No |
| 10297 | Cbx3        | 0.0000 | No |
| 10298 | Cbx3-ps1    | 0.0000 | No |
| 10299 | Cbx3-ps2    | 0.0000 | No |
| 10300 | Cbx3-ps3    | 0.0000 | No |
| 10301 | Cbx3-ps4    | 0.0000 | No |



|       |           |        |    |
|-------|-----------|--------|----|
| 10302 | Cbx3-ps5  | 0.0000 | No |
| 10303 | Cbx3-ps6  | 0.0000 | No |
| 10304 | Cbx4      | 0.0000 | No |
| 10305 | Cbx5      | 0.0000 | No |
| 10306 | Cbx6      | 0.0000 | No |
| 10307 | Cbx7      | 0.0000 | No |
| 10308 | Cbx8      | 0.0000 | No |
| 10309 | Cby1      | 0.0000 | No |
| 10310 | Cc2d1a    | 0.0000 | No |
| 10311 | Cc2d1b    | 0.0000 | No |
| 10312 | Cc2d2a    | 0.0000 | No |
| 10313 | Cc2d2b    | 0.0000 | No |
| 10314 | Ccar1     | 0.0000 | No |
| 10315 | Ccar2     | 0.0000 | No |
| 10316 | Ccbe1     | 0.0000 | No |
| 10317 | Ccdc102a  | 0.0000 | No |
| 10318 | Ccdc103   | 0.0000 | No |
| 10319 | Ccdc105   | 0.0000 | No |
| 10320 | Ccdc107   | 0.0000 | No |
| 10321 | Ccdc108   | 0.0000 | No |
| 10322 | Ccdc109b  | 0.0000 | No |
| 10323 | Ccdc110   | 0.0000 | No |
| 10324 | Ccdc112   | 0.0000 | No |
| 10325 | Ccdc114   | 0.0000 | No |
| 10326 | Ccdc115   | 0.0000 | No |
| 10327 | Ccdc116   | 0.0000 | No |
| 10328 | Ccdc12    | 0.0000 | No |
| 10329 | Ccdc120   | 0.0000 | No |
| 10330 | Ccdc121   | 0.0000 | No |
| 10331 | Ccdc122   | 0.0000 | No |
| 10332 | Ccdc124   | 0.0000 | No |
| 10333 | Ccdc125   | 0.0000 | No |
| 10334 | Ccdc126   | 0.0000 | No |
| 10335 | Ccdc127   | 0.0000 | No |
| 10336 | Ccdc13    | 0.0000 | No |
| 10337 | Ccdc130   | 0.0000 | No |
| 10338 | Ccdc134   | 0.0000 | No |
| 10339 | Ccdc136   | 0.0000 | No |
| 10340 | Ccdc137   | 0.0000 | No |
| 10341 | Ccdc138   | 0.0000 | No |
| 10342 | Ccdc14    | 0.0000 | No |
| 10343 | Ccdc141   | 0.0000 | No |
| 10344 | Ccdc142   | 0.0000 | No |
| 10345 | Ccdc142os | 0.0000 | No |
| 10346 | Ccdc144b  | 0.0000 | No |
| 10347 | Ccdc146   | 0.0000 | No |

|       |         |        |    |
|-------|---------|--------|----|
| 10348 | Ccdc149 | 0.0000 | No |
| 10349 | Ccdc15  | 0.0000 | No |
| 10350 | Ccdc150 | 0.0000 | No |
| 10351 | Ccdc151 | 0.0000 | No |
| 10352 | Ccdc152 | 0.0000 | No |
| 10353 | Ccdc153 | 0.0000 | No |
| 10354 | Ccdc154 | 0.0000 | No |
| 10355 | Ccdc155 | 0.0000 | No |
| 10356 | Ccdc157 | 0.0000 | No |
| 10357 | Ccdc158 | 0.0000 | No |
| 10358 | Ccdc160 | 0.0000 | No |
| 10359 | Ccdc162 | 0.0000 | No |
| 10360 | Ccdc163 | 0.0000 | No |
| 10361 | Ccdc166 | 0.0000 | No |
| 10362 | Ccdc167 | 0.0000 | No |
| 10363 | Ccdc169 | 0.0000 | No |
| 10364 | Ccdc17  | 0.0000 | No |
| 10365 | Ccdc170 | 0.0000 | No |
| 10366 | Ccdc171 | 0.0000 | No |
| 10367 | Ccdc173 | 0.0000 | No |
| 10368 | Ccdc174 | 0.0000 | No |
| 10369 | Ccdc175 | 0.0000 | No |
| 10370 | Ccdc177 | 0.0000 | No |
| 10371 | Ccdc178 | 0.0000 | No |
| 10372 | Ccdc18  | 0.0000 | No |
| 10373 | Ccdc180 | 0.0000 | No |
| 10374 | Ccdc181 | 0.0000 | No |
| 10375 | Ccdc182 | 0.0000 | No |
| 10376 | Ccdc183 | 0.0000 | No |
| 10377 | Ccdc184 | 0.0000 | No |
| 10378 | Ccdc185 | 0.0000 | No |
| 10379 | Ccdc186 | 0.0000 | No |
| 10380 | Ccdc187 | 0.0000 | No |
| 10381 | Ccdc188 | 0.0000 | No |
| 10382 | Ccdc189 | 0.0000 | No |
| 10383 | Ccdc190 | 0.0000 | No |
| 10384 | Ccdc191 | 0.0000 | No |
| 10385 | Ccdc22  | 0.0000 | No |
| 10386 | Ccdc24  | 0.0000 | No |
| 10387 | Ccdc25  | 0.0000 | No |
| 10388 | Ccdc27  | 0.0000 | No |
| 10389 | Ccdc28a | 0.0000 | No |
| 10390 | Ccdc28b | 0.0000 | No |
| 10391 | Ccdc3   | 0.0000 | No |
| 10392 | Ccdc30  | 0.0000 | No |
| 10393 | Ccdc32  | 0.0000 | No |

|       |           |        |    |
|-------|-----------|--------|----|
| 10394 | Ccdc33    | 0.0000 | No |
| 10395 | Ccdc34    | 0.0000 | No |
| 10396 | Ccdc34os  | 0.0000 | No |
| 10397 | Ccdc36    | 0.0000 | No |
| 10398 | Ccdc38    | 0.0000 | No |
| 10399 | Ccdc39    | 0.0000 | No |
| 10400 | Ccdc40    | 0.0000 | No |
| 10401 | Ccdc42    | 0.0000 | No |
| 10402 | Ccdc42os  | 0.0000 | No |
| 10403 | Ccdc43    | 0.0000 | No |
| 10404 | Ccdc47    | 0.0000 | No |
| 10405 | Ccdc50    | 0.0000 | No |
| 10406 | Ccdc50-ps | 0.0000 | No |
| 10407 | Ccdc51    | 0.0000 | No |
| 10408 | Ccdc53    | 0.0000 | No |
| 10409 | Ccdc57    | 0.0000 | No |
| 10410 | Ccdc58    | 0.0000 | No |
| 10411 | Ccdc59    | 0.0000 | No |
| 10412 | Ccdc6     | 0.0000 | No |
| 10413 | Ccdc60    | 0.0000 | No |
| 10414 | Ccdc61    | 0.0000 | No |
| 10415 | Ccdc62    | 0.0000 | No |
| 10416 | Ccdc63    | 0.0000 | No |
| 10417 | Ccdc64    | 0.0000 | No |
| 10418 | Ccdc65    | 0.0000 | No |
| 10419 | Ccdc66    | 0.0000 | No |
| 10420 | Ccdc67    | 0.0000 | No |
| 10421 | Ccdc68    | 0.0000 | No |
| 10422 | Ccdc69    | 0.0000 | No |
| 10423 | Ccdc70    | 0.0000 | No |
| 10424 | Ccdc71    | 0.0000 | No |
| 10425 | Ccdc711   | 0.0000 | No |
| 10426 | Ccdc73    | 0.0000 | No |
| 10427 | Ccdc74a   | 0.0000 | No |
| 10428 | Ccdc77    | 0.0000 | No |
| 10429 | Ccdc78    | 0.0000 | No |
| 10430 | Ccdc7a    | 0.0000 | No |
| 10431 | Ccdc7b    | 0.0000 | No |
| 10432 | Ccdc8     | 0.0000 | No |
| 10433 | Ccdc80    | 0.0000 | No |
| 10434 | Ccdc81    | 0.0000 | No |
| 10435 | Ccdc82    | 0.0000 | No |
| 10436 | Ccdc83    | 0.0000 | No |
| 10437 | Ccdc84    | 0.0000 | No |
| 10438 | Ccdc85a   | 0.0000 | No |
| 10439 | Ccdc85b   | 0.0000 | No |

|       |           |        |    |
|-------|-----------|--------|----|
| 10440 | Ccdc85c   | 0.0000 | No |
| 10441 | Ccdc86    | 0.0000 | No |
| 10442 | Ccdc87    | 0.0000 | No |
| 10443 | Ccdc88a   | 0.0000 | No |
| 10444 | Ccdc88b   | 0.0000 | No |
| 10445 | Ccdc88c   | 0.0000 | No |
| 10446 | Ccdc89    | 0.0000 | No |
| 10447 | Ccdc9     | 0.0000 | No |
| 10448 | Ccdc90b   | 0.0000 | No |
| 10449 | Ccdc91    | 0.0000 | No |
| 10450 | Ccdc92    | 0.0000 | No |
| 10451 | Ccdc92b   | 0.0000 | No |
| 10452 | Ccdc93    | 0.0000 | No |
| 10453 | Ccdc94    | 0.0000 | No |
| 10454 | Ccdc96    | 0.0000 | No |
| 10455 | Ccdc97    | 0.0000 | No |
| 10456 | Ccer1     | 0.0000 | No |
| 10457 | Ccer2     | 0.0000 | No |
| 10458 | Ccher1    | 0.0000 | No |
| 10459 | Ccin      | 0.0000 | No |
| 10460 | Cck       | 0.0000 | No |
| 10461 | Cckar     | 0.0000 | No |
| 10462 | Cckbr     | 0.0000 | No |
| 10463 | Ccl1      | 0.0000 | No |
| 10464 | Ccl11     | 0.0000 | No |
| 10465 | Ccl19     | 0.0000 | No |
| 10466 | Ccl19-ps1 | 0.0000 | No |
| 10467 | Ccl19-ps3 | 0.0000 | No |
| 10468 | Ccl2      | 0.0000 | No |
| 10469 | Ccl20     | 0.0000 | No |
| 10470 | Ccl21a    | 0.0000 | No |
| 10471 | Ccl21b    | 0.0000 | No |
| 10472 | Ccl21c    | 0.0000 | No |
| 10473 | Ccl22     | 0.0000 | No |
| 10474 | Ccl25     | 0.0000 | No |
| 10475 | Ccl26     | 0.0000 | No |
| 10476 | Ccl27a    | 0.0000 | No |
| 10477 | Ccl27b    | 0.0000 | No |
| 10478 | Ccl28     | 0.0000 | No |
| 10479 | Ccl3      | 0.0000 | No |
| 10480 | Ccl4      | 0.0000 | No |
| 10481 | Ccl5      | 0.0000 | No |
| 10482 | Ccl6      | 0.0000 | No |
| 10483 | Ccl7      | 0.0000 | No |
| 10484 | Ccl8      | 0.0000 | No |
| 10485 | Ccl9      | 0.0000 | No |

|       |          |        |    |
|-------|----------|--------|----|
| 10486 | Ccm2     | 0.0000 | No |
| 10487 | Ccm2l    | 0.0000 | No |
| 10488 | Ccna1    | 0.0000 | No |
| 10489 | Ccna2    | 0.0000 | No |
| 10490 | Ccnb1    | 0.0000 | No |
| 10491 | Ccnb1ip1 | 0.0000 | No |
| 10492 | Ccnb2    | 0.0000 | No |
| 10493 | Ccnb2-ps | 0.0000 | No |
| 10494 | Ccnb3    | 0.0000 | No |
| 10495 | Ccnc     | 0.0000 | No |
| 10496 | Ccnd1    | 0.0000 | No |
| 10497 | Ccnd2    | 0.0000 | No |
| 10498 | Ccnd3    | 0.0000 | No |
| 10499 | Ccnd3-ps | 0.0000 | No |
| 10500 | Ccndbp1  | 0.0000 | No |
| 10501 | Ccne1    | 0.0000 | No |
| 10502 | Ccne2    | 0.0000 | No |
| 10503 | Ccnf     | 0.0000 | No |
| 10504 | Ccng1    | 0.0000 | No |
| 10505 | Ccng2    | 0.0000 | No |
| 10506 | Ccnh     | 0.0000 | No |
| 10507 | Ccni     | 0.0000 | No |
| 10508 | Ccnj     | 0.0000 | No |
| 10509 | Ccnjl    | 0.0000 | No |
| 10510 | Ccnk     | 0.0000 | No |
| 10511 | Ccnl1    | 0.0000 | No |
| 10512 | Ccnl2    | 0.0000 | No |
| 10513 | Ccno     | 0.0000 | No |
| 10514 | Cent1    | 0.0000 | No |
| 10515 | Cent2    | 0.0000 | No |
| 10516 | Ccny     | 0.0000 | No |
| 10517 | Ccnyl1   | 0.0000 | No |
| 10518 | Ccp110   | 0.0000 | No |
| 10519 | Ccpg1    | 0.0000 | No |
| 10520 | Ccpg1os  | 0.0000 | No |
| 10521 | Ccr1     | 0.0000 | No |
| 10522 | Ccr1l1   | 0.0000 | No |
| 10523 | Ccr2     | 0.0000 | No |
| 10524 | Ccr3     | 0.0000 | No |
| 10525 | Ccr4     | 0.0000 | No |
| 10526 | Ccr5     | 0.0000 | No |
| 10527 | Ccr6     | 0.0000 | No |
| 10528 | Ccr8     | 0.0000 | No |
| 10529 | Ccr9     | 0.0000 | No |
| 10530 | Ccr12    | 0.0000 | No |
| 10531 | Ccs      | 0.0000 | No |

|       |          |        |    |
|-------|----------|--------|----|
| 10532 | Ccsap    | 0.0000 | No |
| 10533 | Ccser1   | 0.0000 | No |
| 10534 | Ccser2   | 0.0000 | No |
| 10535 | Cct2     | 0.0000 | No |
| 10536 | Cct3     | 0.0000 | No |
| 10537 | Cct3-ps1 | 0.0000 | No |
| 10538 | Cct4     | 0.0000 | No |
| 10539 | Cct5     | 0.0000 | No |
| 10540 | Cct6a    | 0.0000 | No |
| 10541 | Cct6b    | 0.0000 | No |
| 10542 | Cct7     | 0.0000 | No |
| 10543 | Cct8     | 0.0000 | No |
| 10544 | Cct8l1   | 0.0000 | No |
| 10545 | Ccz1     | 0.0000 | No |
| 10546 | Cd101    | 0.0000 | No |
| 10547 | Cd109    | 0.0000 | No |
| 10548 | Cd14     | 0.0000 | No |
| 10549 | Cd151    | 0.0000 | No |
| 10550 | Cd160    | 0.0000 | No |
| 10551 | Cd163    | 0.0000 | No |
| 10552 | Cd164    | 0.0000 | No |
| 10553 | Cd164l2  | 0.0000 | No |
| 10554 | Cd177    | 0.0000 | No |
| 10555 | Cd1d1    | 0.0000 | No |
| 10556 | Cd1d2    | 0.0000 | No |
| 10557 | Cd2      | 0.0000 | No |
| 10558 | Cd200    | 0.0000 | No |
| 10559 | Cd200r1  | 0.0000 | No |
| 10560 | Cd200r2  | 0.0000 | No |
| 10561 | Cd200r3  | 0.0000 | No |
| 10562 | Cd207    | 0.0000 | No |
| 10563 | Cd209a   | 0.0000 | No |
| 10564 | Cd209b   | 0.0000 | No |
| 10565 | Cd209c   | 0.0000 | No |
| 10566 | Cd209e   | 0.0000 | No |
| 10567 | Cd209f   | 0.0000 | No |
| 10568 | Cd209g   | 0.0000 | No |
| 10569 | Cd22     | 0.0000 | No |
| 10570 | Cd248    | 0.0000 | No |
| 10571 | Cd24a    | 0.0000 | No |
| 10572 | Cd274    | 0.0000 | No |
| 10573 | Cd276    | 0.0000 | No |
| 10574 | Cd28     | 0.0000 | No |
| 10575 | Cd2ap    | 0.0000 | No |
| 10576 | Cd2bp2   | 0.0000 | No |
| 10577 | Cd300a   | 0.0000 | No |

|       |          |        |    |
|-------|----------|--------|----|
| 10578 | Cd300c   | 0.0000 | No |
| 10579 | Cd300lb  | 0.0000 | No |
| 10580 | Cd300ld  | 0.0000 | No |
| 10581 | Cd300ld2 | 0.0000 | No |
| 10582 | Cd300ld3 | 0.0000 | No |
| 10583 | Cd300ld4 | 0.0000 | No |
| 10584 | Cd300ld5 | 0.0000 | No |
| 10585 | Cd300lf  | 0.0000 | No |
| 10586 | Cd300lg  | 0.0000 | No |
| 10587 | Cd302    | 0.0000 | No |
| 10588 | Cd320    | 0.0000 | No |
| 10589 | Cd33     | 0.0000 | No |
| 10590 | Cd34     | 0.0000 | No |
| 10591 | Cd36     | 0.0000 | No |
| 10592 | Cd37     | 0.0000 | No |
| 10593 | Cd38     | 0.0000 | No |
| 10594 | Cd3eap   | 0.0000 | No |
| 10595 | Cd4      | 0.0000 | No |
| 10596 | Cd40     | 0.0000 | No |
| 10597 | Cd40lg   | 0.0000 | No |
| 10598 | Cd44     | 0.0000 | No |
| 10599 | Cd46     | 0.0000 | No |
| 10600 | Cd47     | 0.0000 | No |
| 10601 | Cd48     | 0.0000 | No |
| 10602 | Cd52     | 0.0000 | No |
| 10603 | Cd53     | 0.0000 | No |
| 10604 | Cd55     | 0.0000 | No |
| 10605 | Cd55b    | 0.0000 | No |
| 10606 | Cd59a    | 0.0000 | No |
| 10607 | Cd59b    | 0.0000 | No |
| 10608 | Cd51     | 0.0000 | No |
| 10609 | Cd63     | 0.0000 | No |
| 10610 | Cd63-ps  | 0.0000 | No |
| 10611 | Cd68     | 0.0000 | No |
| 10612 | Cd69     | 0.0000 | No |
| 10613 | Cd7      | 0.0000 | No |
| 10614 | Cd70     | 0.0000 | No |
| 10615 | Cd74     | 0.0000 | No |
| 10616 | Cd80     | 0.0000 | No |
| 10617 | Cd82     | 0.0000 | No |
| 10618 | Cd83     | 0.0000 | No |
| 10619 | Cd84     | 0.0000 | No |
| 10620 | Cd86     | 0.0000 | No |
| 10621 | Cd8a     | 0.0000 | No |
| 10622 | Cd9      | 0.0000 | No |
| 10623 | Cd93     | 0.0000 | No |

|       |          |        |    |
|-------|----------|--------|----|
| 10624 | Cd9912   | 0.0000 | No |
| 10625 | Cd9-ps   | 0.0000 | No |
| 10626 | Cda      | 0.0000 | No |
| 10627 | Cdadcl   | 0.0000 | No |
| 10628 | Cdan1    | 0.0000 | No |
| 10629 | Cdc123   | 0.0000 | No |
| 10630 | Cdc14a   | 0.0000 | No |
| 10631 | Cdc14b   | 0.0000 | No |
| 10632 | Cdc16    | 0.0000 | No |
| 10633 | Cdc20    | 0.0000 | No |
| 10634 | Cdc20b   | 0.0000 | No |
| 10635 | Cdc23    | 0.0000 | No |
| 10636 | Cdc25a   | 0.0000 | No |
| 10637 | Cdc25b   | 0.0000 | No |
| 10638 | Cdc25c   | 0.0000 | No |
| 10639 | Cdc26    | 0.0000 | No |
| 10640 | Cdc27    | 0.0000 | No |
| 10641 | Cdc34    | 0.0000 | No |
| 10642 | Cdc34b   | 0.0000 | No |
| 10643 | Cdc37    | 0.0000 | No |
| 10644 | Cdc3711  | 0.0000 | No |
| 10645 | Cdc40    | 0.0000 | No |
| 10646 | Cdc42    | 0.0000 | No |
| 10647 | Cdc42bpa | 0.0000 | No |
| 10648 | Cdc42bpb | 0.0000 | No |
| 10649 | Cdc42bpg | 0.0000 | No |
| 10650 | Cdc42ep1 | 0.0000 | No |
| 10651 | Cdc42ep2 | 0.0000 | No |
| 10652 | Cdc42ep3 | 0.0000 | No |
| 10653 | Cdc42ep4 | 0.0000 | No |
| 10654 | Cdc42se1 | 0.0000 | No |
| 10655 | Cdc42se2 | 0.0000 | No |
| 10656 | Cdc45    | 0.0000 | No |
| 10657 | Cdc51    | 0.0000 | No |
| 10658 | Cdc6     | 0.0000 | No |
| 10659 | Cdc73    | 0.0000 | No |
| 10660 | Cdca2    | 0.0000 | No |
| 10661 | Cdca3    | 0.0000 | No |
| 10662 | Cdca4    | 0.0000 | No |
| 10663 | Cdca5    | 0.0000 | No |
| 10664 | Cdca7    | 0.0000 | No |
| 10665 | Cdca71   | 0.0000 | No |
| 10666 | Cdca8    | 0.0000 | No |
| 10667 | Cdcp1    | 0.0000 | No |
| 10668 | Cdcp2    | 0.0000 | No |
| 10669 | Cdh1     | 0.0000 | No |



|       |          |        |    |
|-------|----------|--------|----|
| 10670 | Cdh11    | 0.0000 | No |
| 10671 | Cdh12    | 0.0000 | No |
| 10672 | Cdh13    | 0.0000 | No |
| 10673 | Cdh15    | 0.0000 | No |
| 10674 | Cdh16    | 0.0000 | No |
| 10675 | Cdh17    | 0.0000 | No |
| 10676 | Cdh18    | 0.0000 | No |
| 10677 | Cdh19    | 0.0000 | No |
| 10678 | Cdh2     | 0.0000 | No |
| 10679 | Cdh20    | 0.0000 | No |
| 10680 | Cdh23    | 0.0000 | No |
| 10681 | Cdh26    | 0.0000 | No |
| 10682 | Cdh4     | 0.0000 | No |
| 10683 | Cdh5     | 0.0000 | No |
| 10684 | Cdh6     | 0.0000 | No |
| 10685 | Cdh7     | 0.0000 | No |
| 10686 | Cdh8     | 0.0000 | No |
| 10687 | Cdh9     | 0.0000 | No |
| 10688 | Cdhr1    | 0.0000 | No |
| 10689 | Cdhr2    | 0.0000 | No |
| 10690 | Cdhr3    | 0.0000 | No |
| 10691 | Cdhr4    | 0.0000 | No |
| 10692 | Cdhr5    | 0.0000 | No |
| 10693 | Cdip1    | 0.0000 | No |
| 10694 | Cdipt    | 0.0000 | No |
| 10695 | Cdk1     | 0.0000 | No |
| 10696 | Cdk10    | 0.0000 | No |
| 10697 | Cdk11b   | 0.0000 | No |
| 10698 | Cdk12    | 0.0000 | No |
| 10699 | Cdk13    | 0.0000 | No |
| 10700 | Cdk15    | 0.0000 | No |
| 10701 | Cdk16    | 0.0000 | No |
| 10702 | Cdk17    | 0.0000 | No |
| 10703 | Cdk18    | 0.0000 | No |
| 10704 | Cdk19    | 0.0000 | No |
| 10705 | Cdk19os  | 0.0000 | No |
| 10706 | Cdk2     | 0.0000 | No |
| 10707 | Cdk20    | 0.0000 | No |
| 10708 | Cdk2ap1  | 0.0000 | No |
| 10709 | Cdk2ap2  | 0.0000 | No |
| 10710 | Cdk3-ps  | 0.0000 | No |
| 10711 | Cdk4     | 0.0000 | No |
| 10712 | Cdk5     | 0.0000 | No |
| 10713 | Cdk5r1   | 0.0000 | No |
| 10714 | Cdk5r2   | 0.0000 | No |
| 10715 | Cdk5rap1 | 0.0000 | No |

|       |            |        |    |
|-------|------------|--------|----|
| 10716 | Cdk5rap2   | 0.0000 | No |
| 10717 | Cdk5rap3   | 0.0000 | No |
| 10718 | Cdk6       | 0.0000 | No |
| 10719 | Cdk7       | 0.0000 | No |
| 10720 | Cdk8       | 0.0000 | No |
| 10721 | Cdk9       | 0.0000 | No |
| 10722 | Cdkal1     | 0.0000 | No |
| 10723 | Cdkl1      | 0.0000 | No |
| 10724 | Cdkl2      | 0.0000 | No |
| 10725 | Cdkl3      | 0.0000 | No |
| 10726 | Cdkl4      | 0.0000 | No |
| 10727 | Cdkl5      | 0.0000 | No |
| 10728 | Cdkn1a     | 0.0000 | No |
| 10729 | Cdkn1b     | 0.0000 | No |
| 10730 | Cdkn2a     | 0.0000 | No |
| 10731 | Cdkn2aip   | 0.0000 | No |
| 10732 | Cdkn2aipnl | 0.0000 | No |
| 10733 | Cdkn2b     | 0.0000 | No |
| 10734 | Cdkn2c     | 0.0000 | No |
| 10735 | Cdkn2d     | 0.0000 | No |
| 10736 | Cdkn3      | 0.0000 | No |
| 10737 | Cdnf       | 0.0000 | No |
| 10738 | Cdo1       | 0.0000 | No |
| 10739 | Cdon       | 0.0000 | No |
| 10740 | Cdpf1      | 0.0000 | No |
| 10741 | Cdr1       | 0.0000 | No |
| 10742 | Cdr2       | 0.0000 | No |
| 10743 | Cdr2l      | 0.0000 | No |
| 10744 | Cdrt4      | 0.0000 | No |
| 10745 | Cdrt4os1   | 0.0000 | No |
| 10746 | Cds1       | 0.0000 | No |
| 10747 | Cds2       | 0.0000 | No |
| 10748 | Cdt1       | 0.0000 | No |
| 10749 | Cdv3       | 0.0000 | No |
| 10750 | Cdx1       | 0.0000 | No |
| 10751 | Cdx2       | 0.0000 | No |
| 10752 | Cdx4       | 0.0000 | No |
| 10753 | Cdyl       | 0.0000 | No |
| 10754 | Cdyl2      | 0.0000 | No |
| 10755 | Ceacam11   | 0.0000 | No |
| 10756 | Ceacam12   | 0.0000 | No |
| 10757 | Ceacam13   | 0.0000 | No |
| 10758 | Ceacam14   | 0.0000 | No |
| 10759 | Ceacam15   | 0.0000 | No |
| 10760 | Ceacam16   | 0.0000 | No |
| 10761 | Ceacam18   | 0.0000 | No |

|       |            |        |    |
|-------|------------|--------|----|
| 10762 | Ceacam19   | 0.0000 | No |
| 10763 | Ceacam2    | 0.0000 | No |
| 10764 | Ceacam20   | 0.0000 | No |
| 10765 | Ceacam3    | 0.0000 | No |
| 10766 | Ceacam5    | 0.0000 | No |
| 10767 | Ceacam9    | 0.0000 | No |
| 10768 | Ceacam-ps1 | 0.0000 | No |
| 10769 | Cebpa      | 0.0000 | No |
| 10770 | Cebpb      | 0.0000 | No |
| 10771 | Cebpd      | 0.0000 | No |
| 10772 | Cebpg      | 0.0000 | No |
| 10773 | Cebpz      | 0.0000 | No |
| 10774 | Cebpzoz    | 0.0000 | No |
| 10775 | Cecr6      | 0.0000 | No |
| 10776 | Cel        | 0.0000 | No |
| 10777 | Cela1      | 0.0000 | No |
| 10778 | Cela2a     | 0.0000 | No |
| 10779 | Cela3a     | 0.0000 | No |
| 10780 | Cela3b     | 0.0000 | No |
| 10781 | Celf1      | 0.0000 | No |
| 10782 | Celf2      | 0.0000 | No |
| 10783 | Celf3      | 0.0000 | No |
| 10784 | Celf4      | 0.0000 | No |
| 10785 | Celf5      | 0.0000 | No |
| 10786 | Celf6      | 0.0000 | No |
| 10787 | Celsr3     | 0.0000 | No |
| 10788 | Cemip      | 0.0000 | No |
| 10789 | Cend1      | 0.0000 | No |
| 10790 | Cenpa      | 0.0000 | No |
| 10791 | Cenpb      | 0.0000 | No |
| 10792 | Cenpc1     | 0.0000 | No |
| 10793 | Cenpe      | 0.0000 | No |
| 10794 | Cenpf      | 0.0000 | No |
| 10795 | Cenph      | 0.0000 | No |
| 10796 | Cenpi      | 0.0000 | No |
| 10797 | Cenpj      | 0.0000 | No |
| 10798 | Cenpk      | 0.0000 | No |
| 10799 | Cenpl      | 0.0000 | No |
| 10800 | Cenpm      | 0.0000 | No |
| 10801 | Cenpn      | 0.0000 | No |
| 10802 | Cenpo      | 0.0000 | No |
| 10803 | Cenpp      | 0.0000 | No |
| 10804 | Cenpq      | 0.0000 | No |
| 10805 | Cenpt      | 0.0000 | No |
| 10806 | Cenpu      | 0.0000 | No |
| 10807 | Cenpv      | 0.0000 | No |

|       |           |        |    |
|-------|-----------|--------|----|
| 10808 | Cenpw     | 0.0000 | No |
| 10809 | Cep104    | 0.0000 | No |
| 10810 | Cep112    | 0.0000 | No |
| 10811 | Cep112it  | 0.0000 | No |
| 10812 | Cep112os1 | 0.0000 | No |
| 10813 | Cep120    | 0.0000 | No |
| 10814 | Cep126    | 0.0000 | No |
| 10815 | Cep128    | 0.0000 | No |
| 10816 | Cep131    | 0.0000 | No |
| 10817 | Cep135    | 0.0000 | No |
| 10818 | Cep152    | 0.0000 | No |
| 10819 | Cep162    | 0.0000 | No |
| 10820 | Cep164    | 0.0000 | No |
| 10821 | Cep170    | 0.0000 | No |
| 10822 | Cep170b   | 0.0000 | No |
| 10823 | Cep19     | 0.0000 | No |
| 10824 | Cep192    | 0.0000 | No |
| 10825 | Cep250    | 0.0000 | No |
| 10826 | Cep290    | 0.0000 | No |
| 10827 | Cep295    | 0.0000 | No |
| 10828 | Cep350    | 0.0000 | No |
| 10829 | Cep41     | 0.0000 | No |
| 10830 | Cep44     | 0.0000 | No |
| 10831 | Cep55     | 0.0000 | No |
| 10832 | Cep57     | 0.0000 | No |
| 10833 | Cep5711   | 0.0000 | No |
| 10834 | Cep63     | 0.0000 | No |
| 10835 | Cep68     | 0.0000 | No |
| 10836 | Cep70     | 0.0000 | No |
| 10837 | Cep72     | 0.0000 | No |
| 10838 | Cep76     | 0.0000 | No |
| 10839 | Cep78     | 0.0000 | No |
| 10840 | Cep83     | 0.0000 | No |
| 10841 | Cep83os   | 0.0000 | No |
| 10842 | Cep85     | 0.0000 | No |
| 10843 | Cep851    | 0.0000 | No |
| 10844 | Cep89     | 0.0000 | No |
| 10845 | Cep95     | 0.0000 | No |
| 10846 | Cep97     | 0.0000 | No |
| 10847 | Cept1     | 0.0000 | No |
| 10848 | Cer1      | 0.0000 | No |
| 10849 | Cercam    | 0.0000 | No |
| 10850 | Cerkl     | 0.0000 | No |
| 10851 | Cers1     | 0.0000 | No |
| 10852 | Cers2     | 0.0000 | No |
| 10853 | Cers3     | 0.0000 | No |

|       |         |        |    |
|-------|---------|--------|----|
| 10854 | Cers4   | 0.0000 | No |
| 10855 | Cers5   | 0.0000 | No |
| 10856 | Ces1a   | 0.0000 | No |
| 10857 | Ces1b   | 0.0000 | No |
| 10858 | Ces1c   | 0.0000 | No |
| 10859 | Ces1d   | 0.0000 | No |
| 10860 | Ces1e   | 0.0000 | No |
| 10861 | Ces1f   | 0.0000 | No |
| 10862 | Ces1g   | 0.0000 | No |
| 10863 | Ces1h   | 0.0000 | No |
| 10864 | Ces2b   | 0.0000 | No |
| 10865 | Ces2e   | 0.0000 | No |
| 10866 | Ces2g   | 0.0000 | No |
| 10867 | Ces2h   | 0.0000 | No |
| 10868 | Ces3a   | 0.0000 | No |
| 10869 | Ces3b   | 0.0000 | No |
| 10870 | Ces4a   | 0.0000 | No |
| 10871 | Ces5a   | 0.0000 | No |
| 10872 | Cetn3   | 0.0000 | No |
| 10873 | Cetn4   | 0.0000 | No |
| 10874 | Cfap100 | 0.0000 | No |
| 10875 | Cfap157 | 0.0000 | No |
| 10876 | Cfap161 | 0.0000 | No |
| 10877 | Cfap20  | 0.0000 | No |
| 10878 | Cfap206 | 0.0000 | No |
| 10879 | Cfap221 | 0.0000 | No |
| 10880 | Cfap36  | 0.0000 | No |
| 10881 | Cfap43  | 0.0000 | No |
| 10882 | Cfap44  | 0.0000 | No |
| 10883 | Cfap45  | 0.0000 | No |
| 10884 | Cfap46  | 0.0000 | No |
| 10885 | Cfap52  | 0.0000 | No |
| 10886 | Cfap53  | 0.0000 | No |
| 10887 | Cfap54  | 0.0000 | No |
| 10888 | Cfap57  | 0.0000 | No |
| 10889 | Cfap58  | 0.0000 | No |
| 10890 | Cfap61  | 0.0000 | No |
| 10891 | Cfap69  | 0.0000 | No |
| 10892 | Cfap70  | 0.0000 | No |
| 10893 | Cfap73  | 0.0000 | No |
| 10894 | Cfap74  | 0.0000 | No |
| 10895 | Cfap77  | 0.0000 | No |
| 10896 | Cfap97  | 0.0000 | No |
| 10897 | Cfb     | 0.0000 | No |
| 10898 | Cfd     | 0.0000 | No |
| 10899 | Cfdp1   | 0.0000 | No |

|       |               |        |    |
|-------|---------------|--------|----|
| 10900 | Cfh           | 0.0000 | No |
| 10901 | Cfhr1         | 0.0000 | No |
| 10902 | Cfhr2         | 0.0000 | No |
| 10903 | Cfhr3         | 0.0000 | No |
| 10904 | Cfi           | 0.0000 | No |
| 10905 | Cfl1          | 0.0000 | No |
| 10906 | Cfl2          | 0.0000 | No |
| 10907 | Cflar         | 0.0000 | No |
| 10908 | Cftr          | 0.0000 | No |
| 10909 | Cga           | 0.0000 | No |
| 10910 | Cggbp1        | 0.0000 | No |
| 10911 | Cgn           | 0.0000 | No |
| 10912 | Cgnl1         | 0.0000 | No |
| 10913 | Cgref1        | 0.0000 | No |
| 10914 | CH25-309J2.1  | 0.0000 | No |
| 10915 | CH25-395E5.2  | 0.0000 | No |
| 10916 | CH25-502A9.2  | 0.0000 | No |
| 10917 | CH25-588N10.1 | 0.0000 | No |
| 10918 | CH25-588N10.2 | 0.0000 | No |
| 10919 | CH36-165I3.1  | 0.0000 | No |
| 10920 | CH36-169F23.1 | 0.0000 | No |
| 10921 | CH36-169F23.2 | 0.0000 | No |
| 10922 | CH36-169F23.3 | 0.0000 | No |
| 10923 | CH36-169F23.4 | 0.0000 | No |
| 10924 | CH36-169F23.5 | 0.0000 | No |
| 10925 | CH36-204O7.1  | 0.0000 | No |
| 10926 | CH36-472P4.1  | 0.0000 | No |
| 10927 | CH36-472P4.2  | 0.0000 | No |
| 10928 | CH36-472P4.3  | 0.0000 | No |
| 10929 | Chac1         | 0.0000 | No |
| 10930 | Chac2         | 0.0000 | No |
| 10931 | Chad          | 0.0000 | No |
| 10932 | Chaf1a        | 0.0000 | No |
| 10933 | Champ1        | 0.0000 | No |
| 10934 | Chat          | 0.0000 | No |
| 10935 | Chchd1        | 0.0000 | No |
| 10936 | Chchd10       | 0.0000 | No |
| 10937 | Chchd2        | 0.0000 | No |
| 10938 | Chchd3        | 0.0000 | No |
| 10939 | Chchd4        | 0.0000 | No |
| 10940 | Chchd5        | 0.0000 | No |
| 10941 | Chchd6        | 0.0000 | No |
| 10942 | Chchd7        | 0.0000 | No |
| 10943 | Chd1          | 0.0000 | No |
| 10944 | Chd11         | 0.0000 | No |
| 10945 | Chd2          | 0.0000 | No |

|       |         |        |    |
|-------|---------|--------|----|
| 10946 | Chd3os  | 0.0000 | No |
| 10947 | Chd5    | 0.0000 | No |
| 10948 | Chd6    | 0.0000 | No |
| 10949 | Chd7    | 0.0000 | No |
| 10950 | Chd8    | 0.0000 | No |
| 10951 | Chdh    | 0.0000 | No |
| 10952 | Chek1   | 0.0000 | No |
| 10953 | Chek2   | 0.0000 | No |
| 10954 | Cherp   | 0.0000 | No |
| 10955 | Chfr    | 0.0000 | No |
| 10956 | Chga    | 0.0000 | No |
| 10957 | Chgb    | 0.0000 | No |
| 10958 | Chia1   | 0.0000 | No |
| 10959 | Chic1   | 0.0000 | No |
| 10960 | Chic2   | 0.0000 | No |
| 10961 | Chid1   | 0.0000 | No |
| 10962 | Chil1   | 0.0000 | No |
| 10963 | Chil3   | 0.0000 | No |
| 10964 | Chil4   | 0.0000 | No |
| 10965 | Chil5   | 0.0000 | No |
| 10966 | Chil6   | 0.0000 | No |
| 10967 | Chit1   | 0.0000 | No |
| 10968 | Chka    | 0.0000 | No |
| 10969 | Chl1    | 0.0000 | No |
| 10970 | Chm     | 0.0000 | No |
| 10971 | Chml    | 0.0000 | No |
| 10972 | Chmp1a  | 0.0000 | No |
| 10973 | Chmp1b  | 0.0000 | No |
| 10974 | Chmp2a  | 0.0000 | No |
| 10975 | Chmp2b  | 0.0000 | No |
| 10976 | Chmp3   | 0.0000 | No |
| 10977 | Chmp4b  | 0.0000 | No |
| 10978 | Chmp4c  | 0.0000 | No |
| 10979 | Chmp5   | 0.0000 | No |
| 10980 | Chmp6   | 0.0000 | No |
| 10981 | Chmp7   | 0.0000 | No |
| 10982 | Chn1    | 0.0000 | No |
| 10983 | Chn1os1 | 0.0000 | No |
| 10984 | Chn1os3 | 0.0000 | No |
| 10985 | Chod1   | 0.0000 | No |
| 10986 | Chp1    | 0.0000 | No |
| 10987 | Chpf    | 0.0000 | No |
| 10988 | Chpf2   | 0.0000 | No |
| 10989 | Chpt1   | 0.0000 | No |
| 10990 | Chrd11  | 0.0000 | No |
| 10991 | Chrd12  | 0.0000 | No |

|       |         |        |    |
|-------|---------|--------|----|
| 10992 | Chrm1   | 0.0000 | No |
| 10993 | Chrm3   | 0.0000 | No |
| 10994 | Chrm5   | 0.0000 | No |
| 10995 | Chrna2  | 0.0000 | No |
| 10996 | Chrna5  | 0.0000 | No |
| 10997 | Chrna6  | 0.0000 | No |
| 10998 | Chrna9  | 0.0000 | No |
| 10999 | Chrnbl  | 0.0000 | No |
| 11000 | Chrnbl  | 0.0000 | No |
| 11001 | Chrnbl  | 0.0000 | No |
| 11002 | Chrnbl  | 0.0000 | No |
| 11003 | Chrng   | 0.0000 | No |
| 11004 | Chst10  | 0.0000 | No |
| 11005 | Chst11  | 0.0000 | No |
| 11006 | Chst14  | 0.0000 | No |
| 11007 | Chst15  | 0.0000 | No |
| 11008 | Chst4   | 0.0000 | No |
| 11009 | Chst5   | 0.0000 | No |
| 11010 | Chst7   | 0.0000 | No |
| 11011 | Chst8   | 0.0000 | No |
| 11012 | Chst9   | 0.0000 | No |
| 11013 | Chsy1   | 0.0000 | No |
| 11014 | Chsy3   | 0.0000 | No |
| 11015 | Chtf18  | 0.0000 | No |
| 11016 | Chtf8   | 0.0000 | No |
| 11017 | Chtop   | 0.0000 | No |
| 11018 | Chuk    | 0.0000 | No |
| 11019 | Churc1  | 0.0000 | No |
| 11020 | Ciao1   | 0.0000 | No |
| 11021 | Ciapin1 | 0.0000 | No |
| 11022 | Ciart   | 0.0000 | No |
| 11023 | Cib1    | 0.0000 | No |
| 11024 | Cib2    | 0.0000 | No |
| 11025 | Cib3    | 0.0000 | No |
| 11026 | Cib4    | 0.0000 | No |
| 11027 | Cic     | 0.0000 | No |
| 11028 | Cidea   | 0.0000 | No |
| 11029 | Cideb   | 0.0000 | No |
| 11030 | Cidec   | 0.0000 | No |
| 11031 | Ciita   | 0.0000 | No |
| 11032 | Cilp    | 0.0000 | No |
| 11033 | Cilp2   | 0.0000 | No |
| 11034 | Cinp    | 0.0000 | No |
| 11035 | Cipc    | 0.0000 | No |
| 11036 | Cir1    | 0.0000 | No |
| 11037 | Cirh1a  | 0.0000 | No |



|       |           |        |    |
|-------|-----------|--------|----|
| 11038 | Cisd1     | 0.0000 | No |
| 11039 | Cisd2     | 0.0000 | No |
| 11040 | Cisd3     | 0.0000 | No |
| 11041 | Cish      | 0.0000 | No |
| 11042 | Cit       | 0.0000 | No |
| 11043 | Cited2    | 0.0000 | No |
| 11044 | Ciz1      | 0.0000 | No |
| 11045 | CK137956  | 0.0000 | No |
| 11046 | Ckap2     | 0.0000 | No |
| 11047 | Ckap2l    | 0.0000 | No |
| 11048 | Ckap4     | 0.0000 | No |
| 11049 | Ckap5     | 0.0000 | No |
| 11050 | Ckb       | 0.0000 | No |
| 11051 | Ckb-ps1   | 0.0000 | No |
| 11052 | Ckb-ps2   | 0.0000 | No |
| 11053 | Cklf      | 0.0000 | No |
| 11054 | Ckm       | 0.0000 | No |
| 11055 | Ckmt1     | 0.0000 | No |
| 11056 | Ckmt2     | 0.0000 | No |
| 11057 | Cks1b     | 0.0000 | No |
| 11058 | Cks2      | 0.0000 | No |
| 11059 | Clasp1    | 0.0000 | No |
| 11060 | Clasp2    | 0.0000 | No |
| 11061 | Clasrp    | 0.0000 | No |
| 11062 | Clca3a1   | 0.0000 | No |
| 11063 | Clca3a2   | 0.0000 | No |
| 11064 | Clca4a    | 0.0000 | No |
| 11065 | Clca4b    | 0.0000 | No |
| 11066 | Clca4c-ps | 0.0000 | No |
| 11067 | Clcc1     | 0.0000 | No |
| 11068 | Clcf1     | 0.0000 | No |
| 11069 | Clcn1     | 0.0000 | No |
| 11070 | Clcn2     | 0.0000 | No |
| 11071 | Clcn3     | 0.0000 | No |
| 11072 | Clcn4     | 0.0000 | No |
| 11073 | Clcn5     | 0.0000 | No |
| 11074 | Clcn6     | 0.0000 | No |
| 11075 | Clcn7     | 0.0000 | No |
| 11076 | Clcnka    | 0.0000 | No |
| 11077 | Clcnkb    | 0.0000 | No |
| 11078 | Cldn1     | 0.0000 | No |
| 11079 | Cldn10    | 0.0000 | No |
| 11080 | Cldn11    | 0.0000 | No |
| 11081 | Cldn12    | 0.0000 | No |
| 11082 | Cldn13    | 0.0000 | No |
| 11083 | Cldn14    | 0.0000 | No |

|       |           |        |    |
|-------|-----------|--------|----|
| 11084 | Cldn15    | 0.0000 | No |
| 11085 | Cldn16    | 0.0000 | No |
| 11086 | Cldn18    | 0.0000 | No |
| 11087 | Cldn19    | 0.0000 | No |
| 11088 | Cldn20    | 0.0000 | No |
| 11089 | Cldn22    | 0.0000 | No |
| 11090 | Cldn23    | 0.0000 | No |
| 11091 | Cldn24    | 0.0000 | No |
| 11092 | Cldn25-ps | 0.0000 | No |
| 11093 | Cldn3     | 0.0000 | No |
| 11094 | Cldn34a   | 0.0000 | No |
| 11095 | Cldn34b1  | 0.0000 | No |
| 11096 | Cldn34b3  | 0.0000 | No |
| 11097 | Cldn34b4  | 0.0000 | No |
| 11098 | Cldn34c1  | 0.0000 | No |
| 11099 | Cldn34c2  | 0.0000 | No |
| 11100 | Cldn34c3  | 0.0000 | No |
| 11101 | Cldn34c4  | 0.0000 | No |
| 11102 | Cldn34-ps | 0.0000 | No |
| 11103 | Cldn4     | 0.0000 | No |
| 11104 | Cldn5     | 0.0000 | No |
| 11105 | Cldn6     | 0.0000 | No |
| 11106 | Cldn8     | 0.0000 | No |
| 11107 | Cldn9     | 0.0000 | No |
| 11108 | Cldnd1    | 0.0000 | No |
| 11109 | Cldnd2    | 0.0000 | No |
| 11110 | Clec10a   | 0.0000 | No |
| 11111 | Clec11a   | 0.0000 | No |
| 11112 | Clec12a   | 0.0000 | No |
| 11113 | Clec14a   | 0.0000 | No |
| 11114 | Clec16a   | 0.0000 | No |
| 11115 | Clec18a   | 0.0000 | No |
| 11116 | Clec1a    | 0.0000 | No |
| 11117 | Clec2d    | 0.0000 | No |
| 11118 | Clec2e    | 0.0000 | No |
| 11119 | Clec2f    | 0.0000 | No |
| 11120 | Clec2g    | 0.0000 | No |
| 11121 | Clec2h    | 0.0000 | No |
| 11122 | Clec2j    | 0.0000 | No |
| 11123 | Clec2l    | 0.0000 | No |
| 11124 | Clec3a    | 0.0000 | No |
| 11125 | Clec3b    | 0.0000 | No |
| 11126 | Clec4a1   | 0.0000 | No |
| 11127 | Clec4a2   | 0.0000 | No |
| 11128 | Clec4a3   | 0.0000 | No |
| 11129 | Clec4a4   | 0.0000 | No |

|       |         |        |    |
|-------|---------|--------|----|
| 11130 | Clec4b1 | 0.0000 | No |
| 11131 | Clec4b2 | 0.0000 | No |
| 11132 | Clec4d  | 0.0000 | No |
| 11133 | Clec4e  | 0.0000 | No |
| 11134 | Clec4f  | 0.0000 | No |
| 11135 | Clec4g  | 0.0000 | No |
| 11136 | Clec4n  | 0.0000 | No |
| 11137 | Clec5a  | 0.0000 | No |
| 11138 | Clec9a  | 0.0000 | No |
| 11139 | Clgn    | 0.0000 | No |
| 11140 | Clhc1   | 0.0000 | No |
| 11141 | Clic1   | 0.0000 | No |
| 11142 | Clic4   | 0.0000 | No |
| 11143 | Clic5   | 0.0000 | No |
| 11144 | Clic6   | 0.0000 | No |
| 11145 | Clint1  | 0.0000 | No |
| 11146 | Clip1   | 0.0000 | No |
| 11147 | Clip3   | 0.0000 | No |
| 11148 | Clip4   | 0.0000 | No |
| 11149 | Clk1    | 0.0000 | No |
| 11150 | Clk2    | 0.0000 | No |
| 11151 | Clk3    | 0.0000 | No |
| 11152 | Clk4    | 0.0000 | No |
| 11153 | Clmn    | 0.0000 | No |
| 11154 | Clmp    | 0.0000 | No |
| 11155 | Cln3    | 0.0000 | No |
| 11156 | Cln5    | 0.0000 | No |
| 11157 | Cln6    | 0.0000 | No |
| 11158 | Cln8    | 0.0000 | No |
| 11159 | Clns1a  | 0.0000 | No |
| 11160 | Clock   | 0.0000 | No |
| 11161 | Clp1    | 0.0000 | No |
| 11162 | Clpb    | 0.0000 | No |
| 11163 | Clpp    | 0.0000 | No |
| 11164 | Clpsl2  | 0.0000 | No |
| 11165 | Clptm1  | 0.0000 | No |
| 11166 | Clptm11 | 0.0000 | No |
| 11167 | Clpx    | 0.0000 | No |
| 11168 | Clrn1   | 0.0000 | No |
| 11169 | Clrn2   | 0.0000 | No |
| 11170 | Clspn   | 0.0000 | No |
| 11171 | Clstn1  | 0.0000 | No |
| 11172 | Clstn2  | 0.0000 | No |
| 11173 | Clstn3  | 0.0000 | No |
| 11174 | Clta    | 0.0000 | No |
| 11175 | Cltb    | 0.0000 | No |

|       |          |        |    |
|-------|----------|--------|----|
| 11176 | Cltc     | 0.0000 | No |
| 11177 | Clu      | 0.0000 | No |
| 11178 | Cluap1   | 0.0000 | No |
| 11179 | Cluh     | 0.0000 | No |
| 11180 | Clvs2    | 0.0000 | No |
| 11181 | Clybl    | 0.0000 | No |
| 11182 | Cma1     | 0.0000 | No |
| 11183 | Cmah     | 0.0000 | No |
| 11184 | Cmas     | 0.0000 | No |
| 11185 | Cmb1     | 0.0000 | No |
| 11186 | Cmc2     | 0.0000 | No |
| 11187 | Cmc4     | 0.0000 | No |
| 11188 | Cmip     | 0.0000 | No |
| 11189 | Cmklr1   | 0.0000 | No |
| 11190 | Cmpk1    | 0.0000 | No |
| 11191 | Cmpk2    | 0.0000 | No |
| 11192 | Cmss1    | 0.0000 | No |
| 11193 | Cmtm1    | 0.0000 | No |
| 11194 | Cmtm2a   | 0.0000 | No |
| 11195 | Cmtm2b   | 0.0000 | No |
| 11196 | Cmtm3    | 0.0000 | No |
| 11197 | Cmtm4    | 0.0000 | No |
| 11198 | Cmtm5    | 0.0000 | No |
| 11199 | Cmtm6    | 0.0000 | No |
| 11200 | Cmtm7    | 0.0000 | No |
| 11201 | Cmtm8    | 0.0000 | No |
| 11202 | Cmtr1    | 0.0000 | No |
| 11203 | Cmtr2    | 0.0000 | No |
| 11204 | Cmya5    | 0.0000 | No |
| 11205 | CN725425 | 0.0000 | No |
| 11206 | Cnbd1    | 0.0000 | No |
| 11207 | Cnbd2    | 0.0000 | No |
| 11208 | Cnbp     | 0.0000 | No |
| 11209 | Cndp1    | 0.0000 | No |
| 11210 | Cndp2    | 0.0000 | No |
| 11211 | Cnep1r1  | 0.0000 | No |
| 11212 | Cnfn     | 0.0000 | No |
| 11213 | Cnga1    | 0.0000 | No |
| 11214 | Cnga2    | 0.0000 | No |
| 11215 | Cnga3    | 0.0000 | No |
| 11216 | Cnga4    | 0.0000 | No |
| 11217 | Cngb1    | 0.0000 | No |
| 11218 | Cngb3    | 0.0000 | No |
| 11219 | Cnih1    | 0.0000 | No |
| 11220 | Cnih2    | 0.0000 | No |
| 11221 | Cnih3    | 0.0000 | No |

|       |          |        |    |
|-------|----------|--------|----|
| 11222 | Cnih4    | 0.0000 | No |
| 11223 | Cnksr1   | 0.0000 | No |
| 11224 | Cnksr2   | 0.0000 | No |
| 11225 | Cnksr3   | 0.0000 | No |
| 11226 | Cnn1     | 0.0000 | No |
| 11227 | Cnn2     | 0.0000 | No |
| 11228 | Cnnm1    | 0.0000 | No |
| 11229 | Cnnm2    | 0.0000 | No |
| 11230 | Cnnm3    | 0.0000 | No |
| 11231 | Cnnm4    | 0.0000 | No |
| 11232 | Cnot1    | 0.0000 | No |
| 11233 | Cnot10   | 0.0000 | No |
| 11234 | Cnot11   | 0.0000 | No |
| 11235 | Cnot2    | 0.0000 | No |
| 11236 | Cnot3    | 0.0000 | No |
| 11237 | Cnot4    | 0.0000 | No |
| 11238 | Cnot6    | 0.0000 | No |
| 11239 | Cnot6l   | 0.0000 | No |
| 11240 | Cnot7    | 0.0000 | No |
| 11241 | Cnot8    | 0.0000 | No |
| 11242 | Cnot9    | 0.0000 | No |
| 11243 | Cnp      | 0.0000 | No |
| 11244 | Cnppd1   | 0.0000 | No |
| 11245 | Cnpy2    | 0.0000 | No |
| 11246 | Cnpy3    | 0.0000 | No |
| 11247 | Cnpy4    | 0.0000 | No |
| 11248 | Cnr1     | 0.0000 | No |
| 11249 | Cnr2     | 0.0000 | No |
| 11250 | Cnst     | 0.0000 | No |
| 11251 | Cntd1    | 0.0000 | No |
| 11252 | Cntf     | 0.0000 | No |
| 11253 | Cntfr    | 0.0000 | No |
| 11254 | Cntln    | 0.0000 | No |
| 11255 | Cntn1    | 0.0000 | No |
| 11256 | Cntn2    | 0.0000 | No |
| 11257 | Cntn3    | 0.0000 | No |
| 11258 | Cntn4    | 0.0000 | No |
| 11259 | Cntn5    | 0.0000 | No |
| 11260 | Cntn6    | 0.0000 | No |
| 11261 | Cntnap2  | 0.0000 | No |
| 11262 | Cntnap3  | 0.0000 | No |
| 11263 | Cntnap4  | 0.0000 | No |
| 11264 | Cntnap5a | 0.0000 | No |
| 11265 | Cntnap5b | 0.0000 | No |
| 11266 | Cntnap5c | 0.0000 | No |
| 11267 | Cntrl    | 0.0000 | No |

|       |          |        |    |
|-------|----------|--------|----|
| 11268 | Cntrob   | 0.0000 | No |
| 11269 | Coa3     | 0.0000 | No |
| 11270 | Coa4     | 0.0000 | No |
| 11271 | Coa5     | 0.0000 | No |
| 11272 | Coa6     | 0.0000 | No |
| 11273 | Coasy    | 0.0000 | No |
| 11274 | Cobl     | 0.0000 | No |
| 11275 | Coch     | 0.0000 | No |
| 11276 | Cog1     | 0.0000 | No |
| 11277 | Cog2     | 0.0000 | No |
| 11278 | Cog3     | 0.0000 | No |
| 11279 | Cog4     | 0.0000 | No |
| 11280 | Cog5     | 0.0000 | No |
| 11281 | Cog6     | 0.0000 | No |
| 11282 | Cog7     | 0.0000 | No |
| 11283 | Cog8     | 0.0000 | No |
| 11284 | Coil     | 0.0000 | No |
| 11285 | Col10a1  | 0.0000 | No |
| 11286 | Col11a1  | 0.0000 | No |
| 11287 | Col11a2  | 0.0000 | No |
| 11288 | Col12a1  | 0.0000 | No |
| 11289 | Col13a1  | 0.0000 | No |
| 11290 | Col14a1  | 0.0000 | No |
| 11291 | Col15a1  | 0.0000 | No |
| 11292 | Col16a1  | 0.0000 | No |
| 11293 | Col17a1  | 0.0000 | No |
| 11294 | Col18a1  | 0.0000 | No |
| 11295 | Col19a1  | 0.0000 | No |
| 11296 | Col1a1   | 0.0000 | No |
| 11297 | Col1a2   | 0.0000 | No |
| 11298 | Col20a1  | 0.0000 | No |
| 11299 | Col22a1  | 0.0000 | No |
| 11300 | Col23a1  | 0.0000 | No |
| 11301 | Col24a1  | 0.0000 | No |
| 11302 | Col25a1  | 0.0000 | No |
| 11303 | Col26a1  | 0.0000 | No |
| 11304 | Col27a1  | 0.0000 | No |
| 11305 | Col2a1   | 0.0000 | No |
| 11306 | Col3a1   | 0.0000 | No |
| 11307 | Col4a1   | 0.0000 | No |
| 11308 | Col4a2   | 0.0000 | No |
| 11309 | Col4a3   | 0.0000 | No |
| 11310 | Col4a3bp | 0.0000 | No |
| 11311 | Col4a4   | 0.0000 | No |
| 11312 | Col4a5   | 0.0000 | No |
| 11313 | Col4a6   | 0.0000 | No |

|       |          |        |    |
|-------|----------|--------|----|
| 11314 | Col5a1   | 0.0000 | No |
| 11315 | Col5a2   | 0.0000 | No |
| 11316 | Col5a3   | 0.0000 | No |
| 11317 | Col6a1   | 0.0000 | No |
| 11318 | Col6a2   | 0.0000 | No |
| 11319 | Col6a3   | 0.0000 | No |
| 11320 | Col6a4   | 0.0000 | No |
| 11321 | Col6a5   | 0.0000 | No |
| 11322 | Col6a6   | 0.0000 | No |
| 11323 | Col7a1   | 0.0000 | No |
| 11324 | Col8a1   | 0.0000 | No |
| 11325 | Col8a2   | 0.0000 | No |
| 11326 | Col9a1   | 0.0000 | No |
| 11327 | Col9a2   | 0.0000 | No |
| 11328 | Col9a3   | 0.0000 | No |
| 11329 | Colec10  | 0.0000 | No |
| 11330 | Colec11  | 0.0000 | No |
| 11331 | Colec12  | 0.0000 | No |
| 11332 | Colgalt1 | 0.0000 | No |
| 11333 | Colq     | 0.0000 | No |
| 11334 | Commd1   | 0.0000 | No |
| 11335 | Commd10  | 0.0000 | No |
| 11336 | Commd2   | 0.0000 | No |
| 11337 | Commd3   | 0.0000 | No |
| 11338 | Commd4   | 0.0000 | No |
| 11339 | Commd5   | 0.0000 | No |
| 11340 | Commd6   | 0.0000 | No |
| 11341 | Commd7   | 0.0000 | No |
| 11342 | Commd8   | 0.0000 | No |
| 11343 | Commd9   | 0.0000 | No |
| 11344 | Comp     | 0.0000 | No |
| 11345 | Comt     | 0.0000 | No |
| 11346 | Comtd1   | 0.0000 | No |
| 11347 | Copb1    | 0.0000 | No |
| 11348 | Copb2    | 0.0000 | No |
| 11349 | Cope     | 0.0000 | No |
| 11350 | Copg1    | 0.0000 | No |
| 11351 | Copg2    | 0.0000 | No |
| 11352 | Coprs    | 0.0000 | No |
| 11353 | Cops3    | 0.0000 | No |
| 11354 | Cops4    | 0.0000 | No |
| 11355 | Cops5    | 0.0000 | No |
| 11356 | Cops6    | 0.0000 | No |
| 11357 | Cops7a   | 0.0000 | No |
| 11358 | Cops7b   | 0.0000 | No |
| 11359 | Cops8    | 0.0000 | No |

|       |          |        |    |
|-------|----------|--------|----|
| 11360 | Copz1    | 0.0000 | No |
| 11361 | Coq10a   | 0.0000 | No |
| 11362 | Coq10b   | 0.0000 | No |
| 11363 | Coq2     | 0.0000 | No |
| 11364 | Coq3     | 0.0000 | No |
| 11365 | Coq4     | 0.0000 | No |
| 11366 | Coq5     | 0.0000 | No |
| 11367 | Coq6     | 0.0000 | No |
| 11368 | Coq7     | 0.0000 | No |
| 11369 | Coq8a    | 0.0000 | No |
| 11370 | Coq8b    | 0.0000 | No |
| 11371 | Coq9     | 0.0000 | No |
| 11372 | Corin    | 0.0000 | No |
| 11373 | Coro1a   | 0.0000 | No |
| 11374 | Coro1b   | 0.0000 | No |
| 11375 | Coro1c   | 0.0000 | No |
| 11376 | Coro2a   | 0.0000 | No |
| 11377 | Coro6    | 0.0000 | No |
| 11378 | Coro7    | 0.0000 | No |
| 11379 | Cort     | 0.0000 | No |
| 11380 | Cot11    | 0.0000 | No |
| 11381 | Cox10    | 0.0000 | No |
| 11382 | Cox11    | 0.0000 | No |
| 11383 | Cox14    | 0.0000 | No |
| 11384 | Cox15    | 0.0000 | No |
| 11385 | Cox16    | 0.0000 | No |
| 11386 | Cox17    | 0.0000 | No |
| 11387 | Cox18    | 0.0000 | No |
| 11388 | Cox19    | 0.0000 | No |
| 11389 | Cox20    | 0.0000 | No |
| 11390 | Cox20-ps | 0.0000 | No |
| 11391 | Cox4i1   | 0.0000 | No |
| 11392 | Cox4i2   | 0.0000 | No |
| 11393 | Cox5a    | 0.0000 | No |
| 11394 | Cox5b    | 0.0000 | No |
| 11395 | Cox6a1   | 0.0000 | No |
| 11396 | Cox6a2   | 0.0000 | No |
| 11397 | Cox6b1   | 0.0000 | No |
| 11398 | Cox6b2   | 0.0000 | No |
| 11399 | Cox6c    | 0.0000 | No |
| 11400 | Cox7a1   | 0.0000 | No |
| 11401 | Cox7a2   | 0.0000 | No |
| 11402 | Cox7a2l  | 0.0000 | No |
| 11403 | Cox7b    | 0.0000 | No |
| 11404 | Cox7b2   | 0.0000 | No |
| 11405 | Cox7c    | 0.0000 | No |



|       |          |        |    |
|-------|----------|--------|----|
| 11406 | Cox8a    | 0.0000 | No |
| 11407 | Cox8b    | 0.0000 | No |
| 11408 | Cox8c    | 0.0000 | No |
| 11409 | Cp       | 0.0000 | No |
| 11410 | Cpa1     | 0.0000 | No |
| 11411 | Cpa2     | 0.0000 | No |
| 11412 | Cpa3     | 0.0000 | No |
| 11413 | Cpa4     | 0.0000 | No |
| 11414 | Cpa6     | 0.0000 | No |
| 11415 | Cpb2     | 0.0000 | No |
| 11416 | Cpd      | 0.0000 | No |
| 11417 | Cpe      | 0.0000 | No |
| 11418 | Cpeb1    | 0.0000 | No |
| 11419 | Cpeb1os1 | 0.0000 | No |
| 11420 | Cpeb2    | 0.0000 | No |
| 11421 | Cpeb3    | 0.0000 | No |
| 11422 | Cpeb4    | 0.0000 | No |
| 11423 | Cped1    | 0.0000 | No |
| 11424 | Cphx1    | 0.0000 | No |
| 11425 | Cphx2    | 0.0000 | No |
| 11426 | Cphx3    | 0.0000 | No |
| 11427 | Cplx2    | 0.0000 | No |
| 11428 | Cplx3    | 0.0000 | No |
| 11429 | Cpm      | 0.0000 | No |
| 11430 | Cpn1     | 0.0000 | No |
| 11431 | Cpne1    | 0.0000 | No |
| 11432 | Cpne2    | 0.0000 | No |
| 11433 | Cpne3    | 0.0000 | No |
| 11434 | Cpne4    | 0.0000 | No |
| 11435 | Cpne5    | 0.0000 | No |
| 11436 | Cpne6    | 0.0000 | No |
| 11437 | Cpne8    | 0.0000 | No |
| 11438 | Cpne9    | 0.0000 | No |
| 11439 | Cpox     | 0.0000 | No |
| 11440 | Cpped1   | 0.0000 | No |
| 11441 | Cpq      | 0.0000 | No |
| 11442 | Cpsf1    | 0.0000 | No |
| 11443 | Cpsf3    | 0.0000 | No |
| 11444 | Cpsf3l   | 0.0000 | No |
| 11445 | Cpsf4    | 0.0000 | No |
| 11446 | Cpsf4l   | 0.0000 | No |
| 11447 | Cpsf6    | 0.0000 | No |
| 11448 | Cpsf7    | 0.0000 | No |
| 11449 | Cpt1a    | 0.0000 | No |
| 11450 | Cpt1b    | 0.0000 | No |
| 11451 | Cpt1c    | 0.0000 | No |

|       |            |        |    |
|-------|------------|--------|----|
| 11452 | Cpt2       | 0.0000 | No |
| 11453 | Ctp        | 0.0000 | No |
| 11454 | Cpvl       | 0.0000 | No |
| 11455 | Cpxm1      | 0.0000 | No |
| 11456 | Cpxm2      | 0.0000 | No |
| 11457 | Cpz        | 0.0000 | No |
| 11458 | Cr11       | 0.0000 | No |
| 11459 | Cr2        | 0.0000 | No |
| 11460 | CR524822.1 | 0.0000 | No |
| 11461 | CR550303.1 | 0.0000 | No |
| 11462 | CR936839.1 | 0.0000 | No |
| 11463 | CR936839.2 | 0.0000 | No |
| 11464 | CR936839.3 | 0.0000 | No |
| 11465 | CR936839.4 | 0.0000 | No |
| 11466 | CR936842.1 | 0.0000 | No |
| 11467 | CR974586.1 | 0.0000 | No |
| 11468 | CR974586.2 | 0.0000 | No |
| 11469 | CR974586.3 | 0.0000 | No |
| 11470 | CR974586.4 | 0.0000 | No |
| 11471 | CR974586.5 | 0.0000 | No |
| 11472 | CR974586.6 | 0.0000 | No |
| 11473 | Crabp1     | 0.0000 | No |
| 11474 | Crabp2     | 0.0000 | No |
| 11475 | Cracr2a    | 0.0000 | No |
| 11476 | Cracr2b    | 0.0000 | No |
| 11477 | Cradd      | 0.0000 | No |
| 11478 | Crat       | 0.0000 | No |
| 11479 | Crb1       | 0.0000 | No |
| 11480 | Crb1-ps    | 0.0000 | No |
| 11481 | Crb2       | 0.0000 | No |
| 11482 | Crb3       | 0.0000 | No |
| 11483 | Crbn       | 0.0000 | No |
| 11484 | Crcp       | 0.0000 | No |
| 11485 | Crc1       | 0.0000 | No |
| 11486 | Creb1      | 0.0000 | No |
| 11487 | Creb3      | 0.0000 | No |
| 11488 | Creb3l1    | 0.0000 | No |
| 11489 | Creb3l4    | 0.0000 | No |
| 11490 | Crebbp     | 0.0000 | No |
| 11491 | Crebl2     | 0.0000 | No |
| 11492 | Crebrf     | 0.0000 | No |
| 11493 | Crebzf     | 0.0000 | No |
| 11494 | Creg1      | 0.0000 | No |
| 11495 | Creld1     | 0.0000 | No |
| 11496 | Creld2     | 0.0000 | No |
| 11497 | Crem       | 0.0000 | No |

|       |          |        |    |
|-------|----------|--------|----|
| 11498 | Crh      | 0.0000 | No |
| 11499 | Crhbp    | 0.0000 | No |
| 11500 | Crhr1    | 0.0000 | No |
| 11501 | Crhr2    | 0.0000 | No |
| 11502 | Crim1    | 0.0000 | No |
| 11503 | Crip1    | 0.0000 | No |
| 11504 | Crip2    | 0.0000 | No |
| 11505 | Crip3    | 0.0000 | No |
| 11506 | Cript    | 0.0000 | No |
| 11507 | Crisp1   | 0.0000 | No |
| 11508 | Crisp2   | 0.0000 | No |
| 11509 | Crisp3   | 0.0000 | No |
| 11510 | Crispld1 | 0.0000 | No |
| 11511 | Crispld2 | 0.0000 | No |
| 11512 | Crk      | 0.0000 | No |
| 11513 | Crkl     | 0.0000 | No |
| 11514 | Crlf1    | 0.0000 | No |
| 11515 | Crlf2    | 0.0000 | No |
| 11516 | Crlf3    | 0.0000 | No |
| 11517 | Crls1    | 0.0000 | No |
| 11518 | Crmp1    | 0.0000 | No |
| 11519 | Crnde    | 0.0000 | No |
| 11520 | Crnk11   | 0.0000 | No |
| 11521 | Crnn     | 0.0000 | No |
| 11522 | Crocc    | 0.0000 | No |
| 11523 | Crot     | 0.0000 | No |
| 11524 | Crp      | 0.0000 | No |
| 11525 | Crry-ps  | 0.0000 | No |
| 11526 | Crs-ps   | 0.0000 | No |
| 11527 | Crtac1   | 0.0000 | No |
| 11528 | Crtap    | 0.0000 | No |
| 11529 | Crtc1    | 0.0000 | No |
| 11530 | Crtc2    | 0.0000 | No |
| 11531 | Crtc3    | 0.0000 | No |
| 11532 | Crx      | 0.0000 | No |
| 11533 | Crxos    | 0.0000 | No |
| 11534 | Cry2     | 0.0000 | No |
| 11535 | Cryab    | 0.0000 | No |
| 11536 | Cryba1   | 0.0000 | No |
| 11537 | Cryba4   | 0.0000 | No |
| 11538 | Crybb1   | 0.0000 | No |
| 11539 | Crybb2   | 0.0000 | No |
| 11540 | Crybb3   | 0.0000 | No |
| 11541 | Crybg3   | 0.0000 | No |
| 11542 | Crygb    | 0.0000 | No |
| 11543 | Crygc    | 0.0000 | No |

|       |            |        |    |
|-------|------------|--------|----|
| 11544 | Crygd      | 0.0000 | No |
| 11545 | Cryge      | 0.0000 | No |
| 11546 | Crygs      | 0.0000 | No |
| 11547 | Cryl1      | 0.0000 | No |
| 11548 | Crym       | 0.0000 | No |
| 11549 | Cryz       | 0.0000 | No |
| 11550 | Cryzl1     | 0.0000 | No |
| 11551 | Csad       | 0.0000 | No |
| 11552 | Csdc2      | 0.0000 | No |
| 11553 | Csde1      | 0.0000 | No |
| 11554 | Cse11      | 0.0000 | No |
| 11555 | Csf1       | 0.0000 | No |
| 11556 | Csf1r      | 0.0000 | No |
| 11557 | Csf2ra     | 0.0000 | No |
| 11558 | Csf2rb2    | 0.0000 | No |
| 11559 | Csf3       | 0.0000 | No |
| 11560 | Csf3r      | 0.0000 | No |
| 11561 | Csgalnact1 | 0.0000 | No |
| 11562 | Csgalnact2 | 0.0000 | No |
| 11563 | Csl        | 0.0000 | No |
| 11564 | Csmd2      | 0.0000 | No |
| 11565 | Csmd2os    | 0.0000 | No |
| 11566 | Csmd3      | 0.0000 | No |
| 11567 | Csn1s1     | 0.0000 | No |
| 11568 | Csn1s2a    | 0.0000 | No |
| 11569 | Csn1s2b    | 0.0000 | No |
| 11570 | Csn2       | 0.0000 | No |
| 11571 | Csn3       | 0.0000 | No |
| 11572 | Csnk1a1    | 0.0000 | No |
| 11573 | Csnk1d     | 0.0000 | No |
| 11574 | Csnk1e     | 0.0000 | No |
| 11575 | Csnk1g1    | 0.0000 | No |
| 11576 | Csnk1g2    | 0.0000 | No |
| 11577 | Csnk1g3    | 0.0000 | No |
| 11578 | Csnk2a1    | 0.0000 | No |
| 11579 | Csnk2a1-ps | 0.0000 | No |
| 11580 | Csnk2a2    | 0.0000 | No |
| 11581 | Csnk2b     | 0.0000 | No |
| 11582 | Csnka2ip   | 0.0000 | No |
| 11583 | Cspg4      | 0.0000 | No |
| 11584 | Cspg5      | 0.0000 | No |
| 11585 | Cspp1      | 0.0000 | No |
| 11586 | Csrnp1     | 0.0000 | No |
| 11587 | Csrnp2     | 0.0000 | No |
| 11588 | Csrnp3     | 0.0000 | No |
| 11589 | Csrp1      | 0.0000 | No |

|       |            |        |    |
|-------|------------|--------|----|
| 11590 | Csrp2      | 0.0000 | No |
| 11591 | Csrp2bp    | 0.0000 | No |
| 11592 | Csrp3      | 0.0000 | No |
| 11593 | Cst12      | 0.0000 | No |
| 11594 | Cst13      | 0.0000 | No |
| 11595 | Cst3       | 0.0000 | No |
| 11596 | Cst6       | 0.0000 | No |
| 11597 | Cst7       | 0.0000 | No |
| 11598 | Cst9       | 0.0000 | No |
| 11599 | Csta1      | 0.0000 | No |
| 11600 | Cstad      | 0.0000 | No |
| 11601 | Cstb       | 0.0000 | No |
| 11602 | Cstf1      | 0.0000 | No |
| 11603 | Cstf2      | 0.0000 | No |
| 11604 | Cstf3      | 0.0000 | No |
| 11605 | CT009635.1 | 0.0000 | No |
| 11606 | CT009635.2 | 0.0000 | No |
| 11607 | CT010495.1 | 0.0000 | No |
| 11608 | CT571246.1 | 0.0000 | No |
| 11609 | CT571246.2 | 0.0000 | No |
| 11610 | CT868723.1 | 0.0000 | No |
| 11611 | Ctag2      | 0.0000 | No |
| 11612 | Ctbp1      | 0.0000 | No |
| 11613 | Ctbp2      | 0.0000 | No |
| 11614 | Ctbs       | 0.0000 | No |
| 11615 | Ctc1       | 0.0000 | No |
| 11616 | Ctcf       | 0.0000 | No |
| 11617 | Ctcf1      | 0.0000 | No |
| 11618 | Ctcflos    | 0.0000 | No |
| 11619 | Ctdnep1    | 0.0000 | No |
| 11620 | Ctdp1      | 0.0000 | No |
| 11621 | Ctdsp1     | 0.0000 | No |
| 11622 | Ctdsp2     | 0.0000 | No |
| 11623 | Ctdspl     | 0.0000 | No |
| 11624 | Ctdspl2    | 0.0000 | No |
| 11625 | Ctf1       | 0.0000 | No |
| 11626 | Ctf2       | 0.0000 | No |
| 11627 | Cthrc1     | 0.0000 | No |
| 11628 | Ctif       | 0.0000 | No |
| 11629 | Ctla2a     | 0.0000 | No |
| 11630 | Ctla2b     | 0.0000 | No |
| 11631 | Ctla4      | 0.0000 | No |
| 11632 | Ctnna1     | 0.0000 | No |
| 11633 | Ctnna2     | 0.0000 | No |
| 11634 | Ctnna3     | 0.0000 | No |
| 11635 | Ctnnal1    | 0.0000 | No |

|       |            |        |    |
|-------|------------|--------|----|
| 11636 | Ctnnb1     | 0.0000 | No |
| 11637 | Ctnnbip1   | 0.0000 | No |
| 11638 | Ctnnb1l    | 0.0000 | No |
| 11639 | Ctnnd1     | 0.0000 | No |
| 11640 | Ctnnd2     | 0.0000 | No |
| 11641 | Ctns       | 0.0000 | No |
| 11642 | Ctps       | 0.0000 | No |
| 11643 | Ctps2      | 0.0000 | No |
| 11644 | Ctr9       | 0.0000 | No |
| 11645 | Ctrb1      | 0.0000 | No |
| 11646 | Ctrc       | 0.0000 | No |
| 11647 | Ctrcos     | 0.0000 | No |
| 11648 | Ctrl       | 0.0000 | No |
| 11649 | Cts3       | 0.0000 | No |
| 11650 | Cts6       | 0.0000 | No |
| 11651 | Cts7       | 0.0000 | No |
| 11652 | Cts8       | 0.0000 | No |
| 11653 | Ctsa       | 0.0000 | No |
| 11654 | Ctsb       | 0.0000 | No |
| 11655 | Ctsc       | 0.0000 | No |
| 11656 | Ctsd       | 0.0000 | No |
| 11657 | Ctse       | 0.0000 | No |
| 11658 | Ctsf       | 0.0000 | No |
| 11659 | Ctsj       | 0.0000 | No |
| 11660 | Ctsk       | 0.0000 | No |
| 11661 | Ctsl       | 0.0000 | No |
| 11662 | Ctsm       | 0.0000 | No |
| 11663 | Ctso       | 0.0000 | No |
| 11664 | Ctsq       | 0.0000 | No |
| 11665 | Ctsr       | 0.0000 | No |
| 11666 | Ctss       | 0.0000 | No |
| 11667 | Ctsw       | 0.0000 | No |
| 11668 | Ctsz       | 0.0000 | No |
| 11669 | Ctn        | 0.0000 | No |
| 11670 | Ctnbp2     | 0.0000 | No |
| 11671 | Ctnbp2nl   | 0.0000 | No |
| 11672 | Ctu1       | 0.0000 | No |
| 11673 | Ctu2       | 0.0000 | No |
| 11674 | Ctxn1      | 0.0000 | No |
| 11675 | Ctxn2      | 0.0000 | No |
| 11676 | Ctxn3      | 0.0000 | No |
| 11677 | CU041226.1 | 0.0000 | No |
| 11678 | CU041226.2 | 0.0000 | No |
| 11679 | CU041251.1 | 0.0000 | No |
| 11680 | CU682339.1 | 0.0000 | No |
| 11681 | Cubn       | 0.0000 | No |

|       |         |        |    |
|-------|---------|--------|----|
| 11682 | Cuedc1  | 0.0000 | No |
| 11683 | Cuedc2  | 0.0000 | No |
| 11684 | Cul1    | 0.0000 | No |
| 11685 | Cul2    | 0.0000 | No |
| 11686 | Cul3    | 0.0000 | No |
| 11687 | Cul4a   | 0.0000 | No |
| 11688 | Cul4b   | 0.0000 | No |
| 11689 | Cul5    | 0.0000 | No |
| 11690 | Cul7    | 0.0000 | No |
| 11691 | Cul9    | 0.0000 | No |
| 11692 | Cuta    | 0.0000 | No |
| 11693 | Cutal   | 0.0000 | No |
| 11694 | Cutc    | 0.0000 | No |
| 11695 | Cux1    | 0.0000 | No |
| 11696 | Cux2    | 0.0000 | No |
| 11697 | Cuzd1   | 0.0000 | No |
| 11698 | Cwc15   | 0.0000 | No |
| 11699 | Cwc22   | 0.0000 | No |
| 11700 | Cwc25   | 0.0000 | No |
| 11701 | Cwc27   | 0.0000 | No |
| 11702 | Cwf1911 | 0.0000 | No |
| 11703 | Cwf1912 | 0.0000 | No |
| 11704 | Cwh43   | 0.0000 | No |
| 11705 | Cx3cl1  | 0.0000 | No |
| 11706 | Cx3cr1  | 0.0000 | No |
| 11707 | Cxadr   | 0.0000 | No |
| 11708 | Cxcl10  | 0.0000 | No |
| 11709 | Cxcl11  | 0.0000 | No |
| 11710 | Cxcl12  | 0.0000 | No |
| 11711 | Cxcl14  | 0.0000 | No |
| 11712 | Cxcl15  | 0.0000 | No |
| 11713 | Cxcl16  | 0.0000 | No |
| 11714 | Cxcl17  | 0.0000 | No |
| 11715 | Cxcl2   | 0.0000 | No |
| 11716 | Cxcl5   | 0.0000 | No |
| 11717 | Cxcl9   | 0.0000 | No |
| 11718 | Cxcr1   | 0.0000 | No |
| 11719 | Cxcr2   | 0.0000 | No |
| 11720 | Cxcr3   | 0.0000 | No |
| 11721 | Cxcr4   | 0.0000 | No |
| 11722 | Cxcr5   | 0.0000 | No |
| 11723 | Cxcr6   | 0.0000 | No |
| 11724 | Cxx1a   | 0.0000 | No |
| 11725 | Cxx1b   | 0.0000 | No |
| 11726 | Cxx1c   | 0.0000 | No |
| 11727 | Cxxcl   | 0.0000 | No |

|       |            |        |    |
|-------|------------|--------|----|
| 11728 | Cxxc4      | 0.0000 | No |
| 11729 | Cyb561     | 0.0000 | No |
| 11730 | Cyb561a3   | 0.0000 | No |
| 11731 | Cyb561d1   | 0.0000 | No |
| 11732 | Cyb561d2   | 0.0000 | No |
| 11733 | Cyb5a      | 0.0000 | No |
| 11734 | Cyb5b      | 0.0000 | No |
| 11735 | Cyb5d1     | 0.0000 | No |
| 11736 | Cyb5d2     | 0.0000 | No |
| 11737 | Cyb5r1     | 0.0000 | No |
| 11738 | Cyb5r2     | 0.0000 | No |
| 11739 | Cyb5r4     | 0.0000 | No |
| 11740 | Cyb5rl     | 0.0000 | No |
| 11741 | Cyba       | 0.0000 | No |
| 11742 | Cybrd1     | 0.0000 | No |
| 11743 | Cyc1       | 0.0000 | No |
| 11744 | Cycs       | 0.0000 | No |
| 11745 | Cyct       | 0.0000 | No |
| 11746 | Cyfp1      | 0.0000 | No |
| 11747 | Cyfp2      | 0.0000 | No |
| 11748 | Cygb       | 0.0000 | No |
| 11749 | Cyhr1      | 0.0000 | No |
| 11750 | Cylc1      | 0.0000 | No |
| 11751 | Cylc2      | 0.0000 | No |
| 11752 | Cyld       | 0.0000 | No |
| 11753 | Cyp11a1    | 0.0000 | No |
| 11754 | Cyp11b1    | 0.0000 | No |
| 11755 | Cyp11b2    | 0.0000 | No |
| 11756 | Cyp17a1    | 0.0000 | No |
| 11757 | Cyp19a1    | 0.0000 | No |
| 11758 | Cyp1a1     | 0.0000 | No |
| 11759 | Cyp1a2     | 0.0000 | No |
| 11760 | Cyp1b1     | 0.0000 | No |
| 11761 | Cyp20a1    | 0.0000 | No |
| 11762 | Cyp21a1    | 0.0000 | No |
| 11763 | Cyp21a2-ps | 0.0000 | No |
| 11764 | Cyp24a1    | 0.0000 | No |
| 11765 | Cyp26b1    | 0.0000 | No |
| 11766 | Cyp26c1    | 0.0000 | No |
| 11767 | Cyp27b1    | 0.0000 | No |
| 11768 | Cyp2a12    | 0.0000 | No |
| 11769 | Cyp2a22    | 0.0000 | No |
| 11770 | Cyp2a4     | 0.0000 | No |
| 11771 | Cyp2a5     | 0.0000 | No |
| 11772 | Cyp2ab1    | 0.0000 | No |
| 11773 | Cyp2b13    | 0.0000 | No |



|       |            |        |    |
|-------|------------|--------|----|
| 11774 | Cyp2b19    | 0.0000 | No |
| 11775 | Cyp2b23    | 0.0000 | No |
| 11776 | Cyp2b26-ps | 0.0000 | No |
| 11777 | Cyp2b27-ps | 0.0000 | No |
| 11778 | Cyp2b9     | 0.0000 | No |
| 11779 | Cyp2c29    | 0.0000 | No |
| 11780 | Cyp2c37    | 0.0000 | No |
| 11781 | Cyp2c38    | 0.0000 | No |
| 11782 | Cyp2c40    | 0.0000 | No |
| 11783 | Cyp2c44    | 0.0000 | No |
| 11784 | Cyp2c50    | 0.0000 | No |
| 11785 | Cyp2c53-ps | 0.0000 | No |
| 11786 | Cyp2c54    | 0.0000 | No |
| 11787 | Cyp2c67    | 0.0000 | No |
| 11788 | Cyp2c68    | 0.0000 | No |
| 11789 | Cyp2c69    | 0.0000 | No |
| 11790 | Cyp2c70    | 0.0000 | No |
| 11791 | Cyp2d10    | 0.0000 | No |
| 11792 | Cyp2d11    | 0.0000 | No |
| 11793 | Cyp2d12    | 0.0000 | No |
| 11794 | Cyp2d22    | 0.0000 | No |
| 11795 | Cyp2d26    | 0.0000 | No |
| 11796 | Cyp2d34    | 0.0000 | No |
| 11797 | Cyp2d37-ps | 0.0000 | No |
| 11798 | Cyp2d9     | 0.0000 | No |
| 11799 | Cyp2e1     | 0.0000 | No |
| 11800 | Cyp2f2     | 0.0000 | No |
| 11801 | Cyp2g1     | 0.0000 | No |
| 11802 | Cyp2j11    | 0.0000 | No |
| 11803 | Cyp2j12    | 0.0000 | No |
| 11804 | Cyp2j13    | 0.0000 | No |
| 11805 | Cyp2j14-ps | 0.0000 | No |
| 11806 | Cyp2j15-ps | 0.0000 | No |
| 11807 | Cyp2j6     | 0.0000 | No |
| 11808 | Cyp2j7     | 0.0000 | No |
| 11809 | Cyp2j7-ps1 | 0.0000 | No |
| 11810 | Cyp2j7-ps2 | 0.0000 | No |
| 11811 | Cyp2j7-ps3 | 0.0000 | No |
| 11812 | Cyp2j8     | 0.0000 | No |
| 11813 | Cyp2j9     | 0.0000 | No |
| 11814 | Cyp2r1     | 0.0000 | No |
| 11815 | Cyp2s1     | 0.0000 | No |
| 11816 | Cyp2t4     | 0.0000 | No |
| 11817 | Cyp2u1     | 0.0000 | No |
| 11818 | Cyp2w1     | 0.0000 | No |
| 11819 | Cyp39a1    | 0.0000 | No |

|       |            |        |    |
|-------|------------|--------|----|
| 11820 | Cyp3a11    | 0.0000 | No |
| 11821 | Cyp3a13    | 0.0000 | No |
| 11822 | Cyp3a16    | 0.0000 | No |
| 11823 | Cyp3a25    | 0.0000 | No |
| 11824 | Cyp3a41b   | 0.0000 | No |
| 11825 | Cyp3a44    | 0.0000 | No |
| 11826 | Cyp3a57    | 0.0000 | No |
| 11827 | Cyp3a59    | 0.0000 | No |
| 11828 | Cyp3a63-ps | 0.0000 | No |
| 11829 | Cyp4a10    | 0.0000 | No |
| 11830 | Cyp4a12b   | 0.0000 | No |
| 11831 | Cyp4a14    | 0.0000 | No |
| 11832 | Cyp4a28-ps | 0.0000 | No |
| 11833 | Cyp4a29    | 0.0000 | No |
| 11834 | Cyp4a30b   | 0.0000 | No |
| 11835 | Cyp4a30-ps | 0.0000 | No |
| 11836 | Cyp4a31    | 0.0000 | No |
| 11837 | Cyp4a32    | 0.0000 | No |
| 11838 | Cyp4b1-ps1 | 0.0000 | No |
| 11839 | Cyp4f13    | 0.0000 | No |
| 11840 | Cyp4f14    | 0.0000 | No |
| 11841 | Cyp4f15    | 0.0000 | No |
| 11842 | Cyp4f17    | 0.0000 | No |
| 11843 | Cyp4f37    | 0.0000 | No |
| 11844 | Cyp4f39    | 0.0000 | No |
| 11845 | Cyp4f40    | 0.0000 | No |
| 11846 | Cyp4f41-ps | 0.0000 | No |
| 11847 | Cyp4x1     | 0.0000 | No |
| 11848 | Cyp4x1os   | 0.0000 | No |
| 11849 | Cyp51      | 0.0000 | No |
| 11850 | Cyp7b1     | 0.0000 | No |
| 11851 | Cyp8b1     | 0.0000 | No |
| 11852 | Cypt1      | 0.0000 | No |
| 11853 | Cypt12     | 0.0000 | No |
| 11854 | Cypt15     | 0.0000 | No |
| 11855 | Cypt2      | 0.0000 | No |
| 11856 | Cyr61      | 0.0000 | No |
| 11857 | Cys1       | 0.0000 | No |
| 11858 | Cysltr1    | 0.0000 | No |
| 11859 | Cysltr2    | 0.0000 | No |
| 11860 | Cystm1     | 0.0000 | No |
| 11861 | Cyth1      | 0.0000 | No |
| 11862 | Cyth2      | 0.0000 | No |
| 11863 | Cyth3      | 0.0000 | No |
| 11864 | Cyth4      | 0.0000 | No |
| 11865 | Cytip      | 0.0000 | No |

|       |               |        |    |
|-------|---------------|--------|----|
| 11866 | Cytl1         | 0.0000 | No |
| 11867 | Cyyl1         | 0.0000 | No |
| 11868 | D030018L15Rik | 0.0000 | No |
| 11869 | D030025E07Rik | 0.0000 | No |
| 11870 | D030025P21Rik | 0.0000 | No |
| 11871 | D030028A08Rik | 0.0000 | No |
| 11872 | D030040B21Rik | 0.0000 | No |
| 11873 | D030044L04Rik | 0.0000 | No |
| 11874 | D030046N08Rik | 0.0000 | No |
| 11875 | D030047H15Rik | 0.0000 | No |
| 11876 | D030055H07Rik | 0.0000 | No |
| 11877 | D030056L22Rik | 0.0000 | No |
| 11878 | D030068K23Rik | 0.0000 | No |
| 11879 | D10Jhu81e     | 0.0000 | No |
| 11880 | D10Wsu102e    | 0.0000 | No |
| 11881 | D11Bhm181e    | 0.0000 | No |
| 11882 | D11Wsu47e     | 0.0000 | No |
| 11883 | D130007C19Rik | 0.0000 | No |
| 11884 | D130017N08Rik | 0.0000 | No |
| 11885 | D130019J16Rik | 0.0000 | No |
| 11886 | D130020L05Rik | 0.0000 | No |
| 11887 | D130040H23Rik | 0.0000 | No |
| 11888 | D130043K22Rik | 0.0000 | No |
| 11889 | D130051D11Rik | 0.0000 | No |
| 11890 | D130052B06Rik | 0.0000 | No |
| 11891 | D13Ertd608e   | 0.0000 | No |
| 11892 | D16Ertd472e   | 0.0000 | No |
| 11893 | D17H6S53E     | 0.0000 | No |
| 11894 | D17Wsu92e     | 0.0000 | No |
| 11895 | D1Ertd622e    | 0.0000 | No |
| 11896 | D1Pas1        | 0.0000 | No |
| 11897 | D230017M19Rik | 0.0000 | No |
| 11898 | D230022J07Rik | 0.0000 | No |
| 11899 | D230025D16Rik | 0.0000 | No |
| 11900 | D2Bwg1423e    | 0.0000 | No |
| 11901 | D2hgdh        | 0.0000 | No |
| 11902 | D330020A13Rik | 0.0000 | No |
| 11903 | D330023K18Rik | 0.0000 | No |
| 11904 | D330025C20Rik | 0.0000 | No |
| 11905 | D330041H03Rik | 0.0000 | No |
| 11906 | D330045A20Rik | 0.0000 | No |
| 11907 | D330050G23Rik | 0.0000 | No |
| 11908 | D3Ertd254e    | 0.0000 | No |
| 11909 | D3Ertd751e    | 0.0000 | No |
| 11910 | D430001F17Rik | 0.0000 | No |
| 11911 | D430013B06Rik | 0.0000 | No |

|       |               |        |    |
|-------|---------------|--------|----|
| 11912 | D430018E03Rik | 0.0000 | No |
| 11913 | D430019H16Rik | 0.0000 | No |
| 11914 | D430036J16Rik | 0.0000 | No |
| 11915 | D430041D05Rik | 0.0000 | No |
| 11916 | D430042O09Rik | 0.0000 | No |
| 11917 | D530018E20Rik | 0.0000 | No |
| 11918 | D530033B14Rik | 0.0000 | No |
| 11919 | D530037P16Rik | 0.0000 | No |
| 11920 | D530049I02Rik | 0.0000 | No |
| 11921 | D5Erttd577e   | 0.0000 | No |
| 11922 | D5Erttd579e   | 0.0000 | No |
| 11923 | D5Erttd605e   | 0.0000 | No |
| 11924 | D630002J18Rik | 0.0000 | No |
| 11925 | D630003M21Rik | 0.0000 | No |
| 11926 | D630008O14Rik | 0.0000 | No |
| 11927 | D630011A20Rik | 0.0000 | No |
| 11928 | D630014O11Rik | 0.0000 | No |
| 11929 | D630023F18Rik | 0.0000 | No |
| 11930 | D630023O14Rik | 0.0000 | No |
| 11931 | D630024D03Rik | 0.0000 | No |
| 11932 | D630030B08Rik | 0.0000 | No |
| 11933 | D630033O11Rik | 0.0000 | No |
| 11934 | D630036H23Rik | 0.0000 | No |
| 11935 | D630039A03Rik | 0.0000 | No |
| 11936 | D630044L22Rik | 0.0000 | No |
| 11937 | D630045J12Rik | 0.0000 | No |
| 11938 | D6Erttd474e   | 0.0000 | No |
| 11939 | D6Erttd527e   | 0.0000 | No |
| 11940 | D6Wsu163e     | 0.0000 | No |
| 11941 | D730001G18Rik | 0.0000 | No |
| 11942 | D730003I15Rik | 0.0000 | No |
| 11943 | D730045A05Rik | 0.0000 | No |
| 11944 | D730045B01Rik | 0.0000 | No |
| 11945 | D7Bwg0826e    | 0.0000 | No |
| 11946 | D7Erttd443e   | 0.0000 | No |
| 11947 | D830025C05Rik | 0.0000 | No |
| 11948 | D830026I12Rik | 0.0000 | No |
| 11949 | D830030K20Rik | 0.0000 | No |
| 11950 | D830032E09Rik | 0.0000 | No |
| 11951 | D830036C21Rik | 0.0000 | No |
| 11952 | D830039M14Rik | 0.0000 | No |
| 11953 | D830044I16Rik | 0.0000 | No |
| 11954 | D830050J10Rik | 0.0000 | No |
| 11955 | D8Erttd738e   | 0.0000 | No |
| 11956 | D8Erttd82e    | 0.0000 | No |
| 11957 | D930007J09Rik | 0.0000 | No |

|       |               |        |    |
|-------|---------------|--------|----|
| 11958 | D930007P13Rik | 0.0000 | No |
| 11959 | D930015M05Rik | 0.0000 | No |
| 11960 | D930016D06Rik | 0.0000 | No |
| 11961 | D930019O06Rik | 0.0000 | No |
| 11962 | D930020B18Rik | 0.0000 | No |
| 11963 | D930028M14Rik | 0.0000 | No |
| 11964 | D930030I03Rik | 0.0000 | No |
| 11965 | D930032P07Rik | 0.0000 | No |
| 11966 | D930048G16Rik | 0.0000 | No |
| 11967 | D930048N14Rik | 0.0000 | No |
| 11968 | Daam1         | 0.0000 | No |
| 11969 | Daam2         | 0.0000 | No |
| 11970 | Dab1          | 0.0000 | No |
| 11971 | Dab2          | 0.0000 | No |
| 11972 | Dab2ip        | 0.0000 | No |
| 11973 | Dach1         | 0.0000 | No |
| 11974 | Dach2         | 0.0000 | No |
| 11975 | Dact1         | 0.0000 | No |
| 11976 | Dact3         | 0.0000 | No |
| 11977 | Dad1          | 0.0000 | No |
| 11978 | Dag1          | 0.0000 | No |
| 11979 | Dagla         | 0.0000 | No |
| 11980 | Daglb         | 0.0000 | No |
| 11981 | Dalrd3        | 0.0000 | No |
| 11982 | Dancr         | 0.0000 | No |
| 11983 | Dand5         | 0.0000 | No |
| 11984 | Dao           | 0.0000 | No |
| 11985 | Dap           | 0.0000 | No |
| 11986 | Dap3          | 0.0000 | No |
| 11987 | Dapk1         | 0.0000 | No |
| 11988 | Dapk3         | 0.0000 | No |
| 11989 | Dapp1         | 0.0000 | No |
| 11990 | Dars          | 0.0000 | No |
| 11991 | Dars2         | 0.0000 | No |
| 11992 | Daw1          | 0.0000 | No |
| 11993 | Daxx          | 0.0000 | No |
| 11994 | Dazap1        | 0.0000 | No |
| 11995 | Dazap2        | 0.0000 | No |
| 11996 | Dazl          | 0.0000 | No |
| 11997 | Dbf4          | 0.0000 | No |
| 11998 | Dbh           | 0.0000 | No |
| 11999 | Dbhos         | 0.0000 | No |
| 12000 | Dbi           | 0.0000 | No |
| 12001 | Dbil5         | 0.0000 | No |
| 12002 | Dbnnd1        | 0.0000 | No |
| 12003 | Dbnnd2        | 0.0000 | No |

|       |          |        |    |
|-------|----------|--------|----|
| 12004 | Dbnl     | 0.0000 | No |
| 12005 | Dbp      | 0.0000 | No |
| 12006 | Dbpht2   | 0.0000 | No |
| 12007 | Dbr1     | 0.0000 | No |
| 12008 | Dbt      | 0.0000 | No |
| 12009 | Dbx1     | 0.0000 | No |
| 12010 | Dbx2     | 0.0000 | No |
| 12011 | Dcaf10   | 0.0000 | No |
| 12012 | Dcaf11   | 0.0000 | No |
| 12013 | Dcaf12   | 0.0000 | No |
| 12014 | Dcaf12l1 | 0.0000 | No |
| 12015 | Dcaf12l2 | 0.0000 | No |
| 12016 | Dcaf13   | 0.0000 | No |
| 12017 | Dcaf15   | 0.0000 | No |
| 12018 | Dcaf17   | 0.0000 | No |
| 12019 | Dcaf4    | 0.0000 | No |
| 12020 | Dcaf5    | 0.0000 | No |
| 12021 | Dcaf6    | 0.0000 | No |
| 12022 | Dcaf8    | 0.0000 | No |
| 12023 | Dcakd    | 0.0000 | No |
| 12024 | Dcbld1   | 0.0000 | No |
| 12025 | Dcbld2   | 0.0000 | No |
| 12026 | Dcc      | 0.0000 | No |
| 12027 | Dcdc2a   | 0.0000 | No |
| 12028 | Dcdc2b   | 0.0000 | No |
| 12029 | Dcdc5    | 0.0000 | No |
| 12030 | Dchs1    | 0.0000 | No |
| 12031 | Dchs2    | 0.0000 | No |
| 12032 | Dclk1    | 0.0000 | No |
| 12033 | Dclk2    | 0.0000 | No |
| 12034 | Dclk3    | 0.0000 | No |
| 12035 | Dclre1a  | 0.0000 | No |
| 12036 | Dclre1b  | 0.0000 | No |
| 12037 | Dclre1c  | 0.0000 | No |
| 12038 | Dcn      | 0.0000 | No |
| 12039 | Dcp1a    | 0.0000 | No |
| 12040 | Dcp1b    | 0.0000 | No |
| 12041 | Dcp2     | 0.0000 | No |
| 12042 | Dcpp1    | 0.0000 | No |
| 12043 | Dcpp2    | 0.0000 | No |
| 12044 | Dcps     | 0.0000 | No |
| 12045 | Dcst1    | 0.0000 | No |
| 12046 | Dcst2    | 0.0000 | No |
| 12047 | Dcstamp  | 0.0000 | No |
| 12048 | Dct      | 0.0000 | No |
| 12049 | Dctd     | 0.0000 | No |

|       |         |        |    |
|-------|---------|--------|----|
| 12050 | Dctn2   | 0.0000 | No |
| 12051 | Dctn3   | 0.0000 | No |
| 12052 | Dctn4   | 0.0000 | No |
| 12053 | Dctn5   | 0.0000 | No |
| 12054 | Dctn6   | 0.0000 | No |
| 12055 | Dctpp1  | 0.0000 | No |
| 12056 | Dcun1d1 | 0.0000 | No |
| 12057 | Dcun1d2 | 0.0000 | No |
| 12058 | Dcun1d3 | 0.0000 | No |
| 12059 | Dcun1d4 | 0.0000 | No |
| 12060 | Dcun1d5 | 0.0000 | No |
| 12061 | Dcx     | 0.0000 | No |
| 12062 | Dda1    | 0.0000 | No |
| 12063 | Ddah1   | 0.0000 | No |
| 12064 | Ddah2   | 0.0000 | No |
| 12065 | Ddb1    | 0.0000 | No |
| 12066 | Ddb2    | 0.0000 | No |
| 12067 | Ddc     | 0.0000 | No |
| 12068 | Ddhd1   | 0.0000 | No |
| 12069 | Ddhd2   | 0.0000 | No |
| 12070 | Ddi1    | 0.0000 | No |
| 12071 | Ddi2    | 0.0000 | No |
| 12072 | Ddias   | 0.0000 | No |
| 12073 | Ddit3   | 0.0000 | No |
| 12074 | Ddit4   | 0.0000 | No |
| 12075 | Ddit4l  | 0.0000 | No |
| 12076 | Ddn     | 0.0000 | No |
| 12077 | Ddo     | 0.0000 | No |
| 12078 | Ddost   | 0.0000 | No |
| 12079 | Ddr1    | 0.0000 | No |
| 12080 | Ddr2    | 0.0000 | No |
| 12081 | Ddrgk1  | 0.0000 | No |
| 12082 | Ddt     | 0.0000 | No |
| 12083 | Ddx1    | 0.0000 | No |
| 12084 | Ddx10   | 0.0000 | No |
| 12085 | Ddx11   | 0.0000 | No |
| 12086 | Ddx17   | 0.0000 | No |
| 12087 | Ddx18   | 0.0000 | No |
| 12088 | Ddx19a  | 0.0000 | No |
| 12089 | Ddx19b  | 0.0000 | No |
| 12090 | Ddx20   | 0.0000 | No |
| 12091 | Ddx21   | 0.0000 | No |
| 12092 | Ddx23   | 0.0000 | No |
| 12093 | Ddx24   | 0.0000 | No |
| 12094 | Ddx25   | 0.0000 | No |
| 12095 | Ddx27   | 0.0000 | No |

|       |        |        |    |
|-------|--------|--------|----|
| 12096 | Ddx28  | 0.0000 | No |
| 12097 | Ddx31  | 0.0000 | No |
| 12098 | Ddx39  | 0.0000 | No |
| 12099 | Ddx39b | 0.0000 | No |
| 12100 | Ddx3x  | 0.0000 | No |
| 12101 | Ddx3y  | 0.0000 | No |
| 12102 | Ddx4   | 0.0000 | No |
| 12103 | Ddx41  | 0.0000 | No |
| 12104 | Ddx42  | 0.0000 | No |
| 12105 | Ddx47  | 0.0000 | No |
| 12106 | Ddx49  | 0.0000 | No |
| 12107 | Ddx5   | 0.0000 | No |
| 12108 | Ddx50  | 0.0000 | No |
| 12109 | Ddx51  | 0.0000 | No |
| 12110 | Ddx52  | 0.0000 | No |
| 12111 | Ddx54  | 0.0000 | No |
| 12112 | Ddx55  | 0.0000 | No |
| 12113 | Ddx56  | 0.0000 | No |
| 12114 | Ddx58  | 0.0000 | No |
| 12115 | Ddx59  | 0.0000 | No |
| 12116 | Ddx6   | 0.0000 | No |
| 12117 | Ddx60  | 0.0000 | No |
| 12118 | Deaf1  | 0.0000 | No |
| 12119 | Deb1   | 0.0000 | No |
| 12120 | Decr1  | 0.0000 | No |
| 12121 | Decr2  | 0.0000 | No |
| 12122 | Dedd   | 0.0000 | No |
| 12123 | Dedd2  | 0.0000 | No |
| 12124 | Def6   | 0.0000 | No |
| 12125 | Def8   | 0.0000 | No |
| 12126 | Defa2  | 0.0000 | No |
| 12127 | Defa20 | 0.0000 | No |
| 12128 | Defa21 | 0.0000 | No |
| 12129 | Defa22 | 0.0000 | No |
| 12130 | Defa23 | 0.0000 | No |
| 12131 | Defa25 | 0.0000 | No |
| 12132 | Defa27 | 0.0000 | No |
| 12133 | Defa28 | 0.0000 | No |
| 12134 | Defa29 | 0.0000 | No |
| 12135 | Defa3  | 0.0000 | No |
| 12136 | Defa31 | 0.0000 | No |
| 12137 | Defa32 | 0.0000 | No |
| 12138 | Defa33 | 0.0000 | No |
| 12139 | Defa34 | 0.0000 | No |
| 12140 | Defa35 | 0.0000 | No |
| 12141 | Defa36 | 0.0000 | No |



|       |           |        |    |
|-------|-----------|--------|----|
| 12142 | Defa37    | 0.0000 | No |
| 12143 | Defa5     | 0.0000 | No |
| 12144 | Defa-ps1  | 0.0000 | No |
| 12145 | Defa-ps12 | 0.0000 | No |
| 12146 | Defa-ps13 | 0.0000 | No |
| 12147 | Defa-ps14 | 0.0000 | No |
| 12148 | Defa-ps15 | 0.0000 | No |
| 12149 | Defa-ps16 | 0.0000 | No |
| 12150 | Defa-ps17 | 0.0000 | No |
| 12151 | Defa-ps18 | 0.0000 | No |
| 12152 | Defa-ps3  | 0.0000 | No |
| 12153 | Defa-ps4  | 0.0000 | No |
| 12154 | Defa-ps5  | 0.0000 | No |
| 12155 | Defa-ps6  | 0.0000 | No |
| 12156 | Defa-ps8  | 0.0000 | No |
| 12157 | Defa-ps9  | 0.0000 | No |
| 12158 | Defb1     | 0.0000 | No |
| 12159 | Defb10    | 0.0000 | No |
| 12160 | Defb11    | 0.0000 | No |
| 12161 | Defb12    | 0.0000 | No |
| 12162 | Defb13    | 0.0000 | No |
| 12163 | Defb14    | 0.0000 | No |
| 12164 | Defb15    | 0.0000 | No |
| 12165 | Defb18    | 0.0000 | No |
| 12166 | Defb2     | 0.0000 | No |
| 12167 | Defb20    | 0.0000 | No |
| 12168 | Defb21    | 0.0000 | No |
| 12169 | Defb22    | 0.0000 | No |
| 12170 | Defb25    | 0.0000 | No |
| 12171 | Defb26    | 0.0000 | No |
| 12172 | Defb29    | 0.0000 | No |
| 12173 | Defb30    | 0.0000 | No |
| 12174 | Defb33    | 0.0000 | No |
| 12175 | Defb35    | 0.0000 | No |
| 12176 | Defb36    | 0.0000 | No |
| 12177 | Defb37    | 0.0000 | No |
| 12178 | Defb38    | 0.0000 | No |
| 12179 | Defb39    | 0.0000 | No |
| 12180 | Defb40    | 0.0000 | No |
| 12181 | Defb41    | 0.0000 | No |
| 12182 | Defb42    | 0.0000 | No |
| 12183 | Defb43    | 0.0000 | No |
| 12184 | Defb44-ps | 0.0000 | No |
| 12185 | Defb45    | 0.0000 | No |
| 12186 | Defb46    | 0.0000 | No |
| 12187 | Defb48    | 0.0000 | No |

|       |         |        |    |
|-------|---------|--------|----|
| 12188 | Defb5   | 0.0000 | No |
| 12189 | Defb50  | 0.0000 | No |
| 12190 | Defb6   | 0.0000 | No |
| 12191 | Defb7   | 0.0000 | No |
| 12192 | Defb8   | 0.0000 | No |
| 12193 | Defb9   | 0.0000 | No |
| 12194 | Degs1   | 0.0000 | No |
| 12195 | Degs2   | 0.0000 | No |
| 12196 | Dek     | 0.0000 | No |
| 12197 | Dennd1a | 0.0000 | No |
| 12198 | Dennd1b | 0.0000 | No |
| 12199 | Dennd1c | 0.0000 | No |
| 12200 | Dennd2a | 0.0000 | No |
| 12201 | Dennd2c | 0.0000 | No |
| 12202 | Dennd2d | 0.0000 | No |
| 12203 | Dennd3  | 0.0000 | No |
| 12204 | Dennd4a | 0.0000 | No |
| 12205 | Dennd4b | 0.0000 | No |
| 12206 | Dennd4c | 0.0000 | No |
| 12207 | Dennd5a | 0.0000 | No |
| 12208 | Dennd6a | 0.0000 | No |
| 12209 | Dennd6b | 0.0000 | No |
| 12210 | Denr    | 0.0000 | No |
| 12211 | Depdc1a | 0.0000 | No |
| 12212 | Depdc1b | 0.0000 | No |
| 12213 | Depdc5  | 0.0000 | No |
| 12214 | Depdc7  | 0.0000 | No |
| 12215 | Deptor  | 0.0000 | No |
| 12216 | Dera    | 0.0000 | No |
| 12217 | Derl1   | 0.0000 | No |
| 12218 | Derl2   | 0.0000 | No |
| 12219 | Des     | 0.0000 | No |
| 12220 | Desi1   | 0.0000 | No |
| 12221 | Det1    | 0.0000 | No |
| 12222 | Dexi    | 0.0000 | No |
| 12223 | Dffa    | 0.0000 | No |
| 12224 | Dffb    | 0.0000 | No |
| 12225 | Dfna5   | 0.0000 | No |
| 12226 | Dfnb59  | 0.0000 | No |
| 12227 | Dgat1   | 0.0000 | No |
| 12228 | Dgat2   | 0.0000 | No |
| 12229 | Dgat216 | 0.0000 | No |
| 12230 | Dgcr14  | 0.0000 | No |
| 12231 | Dgcr2   | 0.0000 | No |
| 12232 | Dgcr6   | 0.0000 | No |
| 12233 | Dgcr8   | 0.0000 | No |

|       |          |        |    |
|-------|----------|--------|----|
| 12234 | Dgka     | 0.0000 | No |
| 12235 | Dgkb     | 0.0000 | No |
| 12236 | Dgkd     | 0.0000 | No |
| 12237 | Dgke     | 0.0000 | No |
| 12238 | Dgkeos   | 0.0000 | No |
| 12239 | Dgkg     | 0.0000 | No |
| 12240 | Dgkh     | 0.0000 | No |
| 12241 | Dgki     | 0.0000 | No |
| 12242 | Dgkk     | 0.0000 | No |
| 12243 | Dgkq     | 0.0000 | No |
| 12244 | Dgkz     | 0.0000 | No |
| 12245 | Dguok    | 0.0000 | No |
| 12246 | Dhcr24   | 0.0000 | No |
| 12247 | Dhcr7    | 0.0000 | No |
| 12248 | Dhdds    | 0.0000 | No |
| 12249 | Dhdh     | 0.0000 | No |
| 12250 | Dhfr     | 0.0000 | No |
| 12251 | Dhh      | 0.0000 | No |
| 12252 | Dhodh    | 0.0000 | No |
| 12253 | Dhps     | 0.0000 | No |
| 12254 | Dhrs1    | 0.0000 | No |
| 12255 | Dhrs11   | 0.0000 | No |
| 12256 | Dhrs13   | 0.0000 | No |
| 12257 | Dhrs13os | 0.0000 | No |
| 12258 | Dhrs2    | 0.0000 | No |
| 12259 | Dhrs3    | 0.0000 | No |
| 12260 | Dhrs4    | 0.0000 | No |
| 12261 | Dhrs7    | 0.0000 | No |
| 12262 | Dhrs7b   | 0.0000 | No |
| 12263 | Dhrs7c   | 0.0000 | No |
| 12264 | Dhrs9    | 0.0000 | No |
| 12265 | DHR SX   | 0.0000 | No |
| 12266 | Dhtkd1   | 0.0000 | No |
| 12267 | Dhx15    | 0.0000 | No |
| 12268 | Dhx16    | 0.0000 | No |
| 12269 | Dhx29    | 0.0000 | No |
| 12270 | Dhx30    | 0.0000 | No |
| 12271 | Dhx32    | 0.0000 | No |
| 12272 | Dhx33    | 0.0000 | No |
| 12273 | Dhx34    | 0.0000 | No |
| 12274 | Dhx35    | 0.0000 | No |
| 12275 | Dhx36    | 0.0000 | No |
| 12276 | Dhx37    | 0.0000 | No |
| 12277 | Dhx38    | 0.0000 | No |
| 12278 | Dhx40    | 0.0000 | No |
| 12279 | Dhx57    | 0.0000 | No |

|       |         |        |    |
|-------|---------|--------|----|
| 12280 | Dhx58   | 0.0000 | No |
| 12281 | Dhx58os | 0.0000 | No |
| 12282 | Dhx9    | 0.0000 | No |
| 12283 | Diablo  | 0.0000 | No |
| 12284 | Diaph1  | 0.0000 | No |
| 12285 | Diaph2  | 0.0000 | No |
| 12286 | Diaph3  | 0.0000 | No |
| 12287 | Dicer1  | 0.0000 | No |
| 12288 | Dido1   | 0.0000 | No |
| 12289 | Diexf   | 0.0000 | No |
| 12290 | Dimt1   | 0.0000 | No |
| 12291 | Dio2    | 0.0000 | No |
| 12292 | Dio3    | 0.0000 | No |
| 12293 | Dip2a   | 0.0000 | No |
| 12294 | Dip2b   | 0.0000 | No |
| 12295 | Dip2c   | 0.0000 | No |
| 12296 | Diras1  | 0.0000 | No |
| 12297 | Diras2  | 0.0000 | No |
| 12298 | Dirc2   | 0.0000 | No |
| 12299 | Dis3    | 0.0000 | No |
| 12300 | Dis3l   | 0.0000 | No |
| 12301 | Dis3l2  | 0.0000 | No |
| 12302 | Disp1   | 0.0000 | No |
| 12303 | Disp2   | 0.0000 | No |
| 12304 | Dixdc1  | 0.0000 | No |
| 12305 | Dkc1    | 0.0000 | No |
| 12306 | Dkk1    | 0.0000 | No |
| 12307 | Dkk2    | 0.0000 | No |
| 12308 | Dkk3    | 0.0000 | No |
| 12309 | Dkk1l   | 0.0000 | No |
| 12310 | Dlat    | 0.0000 | No |
| 12311 | Dld     | 0.0000 | No |
| 12312 | Dlec1   | 0.0000 | No |
| 12313 | Dleu2   | 0.0000 | No |
| 12314 | Dleu7   | 0.0000 | No |
| 12315 | Dlg1    | 0.0000 | No |
| 12316 | Dlg2    | 0.0000 | No |
| 12317 | Dlg3    | 0.0000 | No |
| 12318 | Dlg4    | 0.0000 | No |
| 12319 | Dlg5    | 0.0000 | No |
| 12320 | Dlgap1  | 0.0000 | No |
| 12321 | Dlgap2  | 0.0000 | No |
| 12322 | Dlgap3  | 0.0000 | No |
| 12323 | Dlgap5  | 0.0000 | No |
| 12324 | Dlk1    | 0.0000 | No |
| 12325 | Dlk2    | 0.0000 | No |

|       |         |        |    |
|-------|---------|--------|----|
| 12326 | Dll1    | 0.0000 | No |
| 12327 | Dll3    | 0.0000 | No |
| 12328 | Dll4    | 0.0000 | No |
| 12329 | Dlst    | 0.0000 | No |
| 12330 | Dlx1    | 0.0000 | No |
| 12331 | Dlx1as  | 0.0000 | No |
| 12332 | Dlx2    | 0.0000 | No |
| 12333 | Dlx5    | 0.0000 | No |
| 12334 | Dlx6os1 | 0.0000 | No |
| 12335 | Dlx6os2 | 0.0000 | No |
| 12336 | Dmap1   | 0.0000 | No |
| 12337 | Dmbt1   | 0.0000 | No |
| 12338 | Dmbx1   | 0.0000 | No |
| 12339 | Dmc1    | 0.0000 | No |
| 12340 | Dmd     | 0.0000 | No |
| 12341 | Dmgdh   | 0.0000 | No |
| 12342 | Dmkn    | 0.0000 | No |
| 12343 | Dmp1    | 0.0000 | No |
| 12344 | Dmrt2   | 0.0000 | No |
| 12345 | Dmrta1  | 0.0000 | No |
| 12346 | Dmrta2  | 0.0000 | No |
| 12347 | Dmrta3  | 0.0000 | No |
| 12348 | Dmrta4  | 0.0000 | No |
| 12349 | Dmrta5  | 0.0000 | No |
| 12350 | Dmrta6  | 0.0000 | No |
| 12351 | Dmrta7  | 0.0000 | No |
| 12352 | Dmrta8  | 0.0000 | No |
| 12353 | Dmrta9  | 0.0000 | No |
| 12354 | Dmrta10 | 0.0000 | No |
| 12355 | Dmrta11 | 0.0000 | No |
| 12356 | Dmrta12 | 0.0000 | No |
| 12357 | Dmrta13 | 0.0000 | No |
| 12358 | Dmrta14 | 0.0000 | No |
| 12359 | Dmrta15 | 0.0000 | No |
| 12360 | Dmrta16 | 0.0000 | No |
| 12361 | Dmrta17 | 0.0000 | No |
| 12362 | Dmrta18 | 0.0000 | No |
| 12363 | Dmrta19 | 0.0000 | No |
| 12364 | Dmrta20 | 0.0000 | No |
| 12365 | Dmrta21 | 0.0000 | No |
| 12366 | Dmrta22 | 0.0000 | No |
| 12367 | Dmrta23 | 0.0000 | No |
| 12368 | Dmrta24 | 0.0000 | No |
| 12369 | Dmrta25 | 0.0000 | No |
| 12370 | Dmrta26 | 0.0000 | No |
| 12371 | Dmrta27 | 0.0000 | No |

|       |            |        |    |
|-------|------------|--------|----|
| 12372 | Dnah6      | 0.0000 | No |
| 12373 | Dnah7a     | 0.0000 | No |
| 12374 | Dnah7b     | 0.0000 | No |
| 12375 | Dnah7c     | 0.0000 | No |
| 12376 | Dnah8      | 0.0000 | No |
| 12377 | Dnah9      | 0.0000 | No |
| 12378 | Dnaic1     | 0.0000 | No |
| 12379 | Dnaic2     | 0.0000 | No |
| 12380 | Dnaja1-ps  | 0.0000 | No |
| 12381 | Dnaja2     | 0.0000 | No |
| 12382 | Dnaja3     | 0.0000 | No |
| 12383 | Dnajb11    | 0.0000 | No |
| 12384 | Dnajb12    | 0.0000 | No |
| 12385 | Dnajb13    | 0.0000 | No |
| 12386 | Dnajb14    | 0.0000 | No |
| 12387 | Dnajb3     | 0.0000 | No |
| 12388 | Dnajb4     | 0.0000 | No |
| 12389 | Dnajb5     | 0.0000 | No |
| 12390 | Dnajb6     | 0.0000 | No |
| 12391 | Dnajb7     | 0.0000 | No |
| 12392 | Dnajb8     | 0.0000 | No |
| 12393 | Dnajb9     | 0.0000 | No |
| 12394 | Dnajc1     | 0.0000 | No |
| 12395 | Dnajc10    | 0.0000 | No |
| 12396 | Dnajc11    | 0.0000 | No |
| 12397 | Dnajc12    | 0.0000 | No |
| 12398 | Dnajc13    | 0.0000 | No |
| 12399 | Dnajc14    | 0.0000 | No |
| 12400 | Dnajc15    | 0.0000 | No |
| 12401 | Dnajc16    | 0.0000 | No |
| 12402 | Dnajc17    | 0.0000 | No |
| 12403 | Dnajc18    | 0.0000 | No |
| 12404 | Dnajc19    | 0.0000 | No |
| 12405 | Dnajc19-ps | 0.0000 | No |
| 12406 | Dnajc2     | 0.0000 | No |
| 12407 | Dnajc21    | 0.0000 | No |
| 12408 | Dnajc22    | 0.0000 | No |
| 12409 | Dnajc24    | 0.0000 | No |
| 12410 | Dnajc25    | 0.0000 | No |
| 12411 | Dnajc27    | 0.0000 | No |
| 12412 | Dnajc28    | 0.0000 | No |
| 12413 | Dnajc30    | 0.0000 | No |
| 12414 | Dnajc4     | 0.0000 | No |
| 12415 | Dnajc5     | 0.0000 | No |
| 12416 | Dnajc5g    | 0.0000 | No |
| 12417 | Dnajc6     | 0.0000 | No |

|       |            |        |    |
|-------|------------|--------|----|
| 12418 | Dnajc7     | 0.0000 | No |
| 12419 | Dnajc8     | 0.0000 | No |
| 12420 | Dnajc9     | 0.0000 | No |
| 12421 | Dnal1      | 0.0000 | No |
| 12422 | Dnal4      | 0.0000 | No |
| 12423 | Dnali1     | 0.0000 | No |
| 12424 | Dnase1     | 0.0000 | No |
| 12425 | Dnase1l1   | 0.0000 | No |
| 12426 | Dnase1l3   | 0.0000 | No |
| 12427 | Dnase2a    | 0.0000 | No |
| 12428 | Dnd1       | 0.0000 | No |
| 12429 | Dnd1-ps    | 0.0000 | No |
| 12430 | Dner       | 0.0000 | No |
| 12431 | Dnhd1      | 0.0000 | No |
| 12432 | Dnlz       | 0.0000 | No |
| 12433 | Dnm1       | 0.0000 | No |
| 12434 | Dnm1l      | 0.0000 | No |
| 12435 | Dnm2       | 0.0000 | No |
| 12436 | Dnm3       | 0.0000 | No |
| 12437 | Dnm3os     | 0.0000 | No |
| 12438 | Dnmt1      | 0.0000 | No |
| 12439 | Dnmt3a     | 0.0000 | No |
| 12440 | Dnmt3aos   | 0.0000 | No |
| 12441 | Dnmt3b     | 0.0000 | No |
| 12442 | Dnmt3bos   | 0.0000 | No |
| 12443 | Dnmt3c-ps  | 0.0000 | No |
| 12444 | Dnmt3l     | 0.0000 | No |
| 12445 | Dnmt3l-ps1 | 0.0000 | No |
| 12446 | Dnpep      | 0.0000 | No |
| 12447 | Dnph1      | 0.0000 | No |
| 12448 | Dnttip1    | 0.0000 | No |
| 12449 | Dnttip2    | 0.0000 | No |
| 12450 | Doc2a      | 0.0000 | No |
| 12451 | Doc2b      | 0.0000 | No |
| 12452 | Doc2g      | 0.0000 | No |
| 12453 | Dock1      | 0.0000 | No |
| 12454 | Dock10     | 0.0000 | No |
| 12455 | Dock2      | 0.0000 | No |
| 12456 | Dock3      | 0.0000 | No |
| 12457 | Dock4      | 0.0000 | No |
| 12458 | Dock5      | 0.0000 | No |
| 12459 | Dock6      | 0.0000 | No |
| 12460 | Dock7      | 0.0000 | No |
| 12461 | Dock8      | 0.0000 | No |
| 12462 | Dock9      | 0.0000 | No |
| 12463 | Dohh       | 0.0000 | No |

|       |          |        |    |
|-------|----------|--------|----|
| 12464 | Dok1     | 0.0000 | No |
| 12465 | Dok2     | 0.0000 | No |
| 12466 | Dok4     | 0.0000 | No |
| 12467 | Dok5     | 0.0000 | No |
| 12468 | Dok6     | 0.0000 | No |
| 12469 | Dok7     | 0.0000 | No |
| 12470 | Dolk     | 0.0000 | No |
| 12471 | Dolpp1   | 0.0000 | No |
| 12472 | Donson   | 0.0000 | No |
| 12473 | Dopey1   | 0.0000 | No |
| 12474 | Dopey2   | 0.0000 | No |
| 12475 | Dot11    | 0.0000 | No |
| 12476 | Doxl2    | 0.0000 | No |
| 12477 | Dpagt1   | 0.0000 | No |
| 12478 | Dpcr1    | 0.0000 | No |
| 12479 | Dpep1    | 0.0000 | No |
| 12480 | Dpep2    | 0.0000 | No |
| 12481 | Dpep3    | 0.0000 | No |
| 12482 | Dpf2     | 0.0000 | No |
| 12483 | Dpf3     | 0.0000 | No |
| 12484 | Dph1     | 0.0000 | No |
| 12485 | Dph2     | 0.0000 | No |
| 12486 | Dph3     | 0.0000 | No |
| 12487 | Dph3b-ps | 0.0000 | No |
| 12488 | Dph5     | 0.0000 | No |
| 12489 | Dph6     | 0.0000 | No |
| 12490 | Dph7     | 0.0000 | No |
| 12491 | Dpm1     | 0.0000 | No |
| 12492 | Dpm2     | 0.0000 | No |
| 12493 | Dpm3     | 0.0000 | No |
| 12494 | Dpp10    | 0.0000 | No |
| 12495 | Dpp3     | 0.0000 | No |
| 12496 | Dpp6     | 0.0000 | No |
| 12497 | Dpp7     | 0.0000 | No |
| 12498 | Dpp8     | 0.0000 | No |
| 12499 | Dpp9     | 0.0000 | No |
| 12500 | Dppa2    | 0.0000 | No |
| 12501 | Dppa3    | 0.0000 | No |
| 12502 | Dppa3-ps | 0.0000 | No |
| 12503 | Dppa4    | 0.0000 | No |
| 12504 | Dppa5a   | 0.0000 | No |
| 12505 | Dpt      | 0.0000 | No |
| 12506 | Dpy1911  | 0.0000 | No |
| 12507 | Dpy1912  | 0.0000 | No |
| 12508 | Dpy1913  | 0.0000 | No |
| 12509 | Dpy1914  | 0.0000 | No |



|       |          |        |    |
|-------|----------|--------|----|
| 12510 | Dpy30    | 0.0000 | No |
| 12511 | Dpys     | 0.0000 | No |
| 12512 | Dpysl2   | 0.0000 | No |
| 12513 | Dpysl3   | 0.0000 | No |
| 12514 | Dpysl4   | 0.0000 | No |
| 12515 | Dpysl5   | 0.0000 | No |
| 12516 | DQ267100 | 0.0000 | No |
| 12517 | DQ267101 | 0.0000 | No |
| 12518 | DQ267102 | 0.0000 | No |
| 12519 | Dr1      | 0.0000 | No |
| 12520 | Dram1    | 0.0000 | No |
| 12521 | Dram2    | 0.0000 | No |
| 12522 | Drap1    | 0.0000 | No |
| 12523 | Draxin   | 0.0000 | No |
| 12524 | Drc7     | 0.0000 | No |
| 12525 | Drd1     | 0.0000 | No |
| 12526 | Drd4     | 0.0000 | No |
| 12527 | Drd5     | 0.0000 | No |
| 12528 | Drg1     | 0.0000 | No |
| 12529 | Drg2     | 0.0000 | No |
| 12530 | Drosha   | 0.0000 | No |
| 12531 | Drp2     | 0.0000 | No |
| 12532 | Drr1     | 0.0000 | No |
| 12533 | Dsc1     | 0.0000 | No |
| 12534 | Dsc2     | 0.0000 | No |
| 12535 | Dsc3     | 0.0000 | No |
| 12536 | Dscam    | 0.0000 | No |
| 12537 | Dscaml1  | 0.0000 | No |
| 12538 | Dscc1    | 0.0000 | No |
| 12539 | Dscr3    | 0.0000 | No |
| 12540 | Dse      | 0.0000 | No |
| 12541 | Dsel     | 0.0000 | No |
| 12542 | Dsg1a    | 0.0000 | No |
| 12543 | Dsg1b    | 0.0000 | No |
| 12544 | Dsg1c    | 0.0000 | No |
| 12545 | Dsg2     | 0.0000 | No |
| 12546 | Dsn1     | 0.0000 | No |
| 12547 | Dsp      | 0.0000 | No |
| 12548 | Dspp     | 0.0000 | No |
| 12549 | Dst      | 0.0000 | No |
| 12550 | Dstn     | 0.0000 | No |
| 12551 | Dstyk    | 0.0000 | No |
| 12552 | Dtd1     | 0.0000 | No |
| 12553 | Dtd2     | 0.0000 | No |
| 12554 | Dthd1    | 0.0000 | No |
| 12555 | Dtl      | 0.0000 | No |

|       |        |        |    |
|-------|--------|--------|----|
| 12556 | Dtna   | 0.0000 | No |
| 12557 | Dtnb   | 0.0000 | No |
| 12558 | Dtnbos | 0.0000 | No |
| 12559 | Dtnbp1 | 0.0000 | No |
| 12560 | Dtwd1  | 0.0000 | No |
| 12561 | Dtwd2  | 0.0000 | No |
| 12562 | Dtx1   | 0.0000 | No |
| 12563 | Dtx2   | 0.0000 | No |
| 12564 | Dtx3   | 0.0000 | No |
| 12565 | Dtx3l  | 0.0000 | No |
| 12566 | Dtx4   | 0.0000 | No |
| 12567 | Dubr   | 0.0000 | No |
| 12568 | Duox2  | 0.0000 | No |
| 12569 | Duoxa1 | 0.0000 | No |
| 12570 | Duoxa2 | 0.0000 | No |
| 12571 | Dupd1  | 0.0000 | No |
| 12572 | Dus1l  | 0.0000 | No |
| 12573 | Dus2   | 0.0000 | No |
| 12574 | Dus3l  | 0.0000 | No |
| 12575 | Dus4l  | 0.0000 | No |
| 12576 | Dusp1  | 0.0000 | No |
| 12577 | Dusp10 | 0.0000 | No |
| 12578 | Dusp11 | 0.0000 | No |
| 12579 | Dusp12 | 0.0000 | No |
| 12580 | Dusp14 | 0.0000 | No |
| 12581 | Dusp15 | 0.0000 | No |
| 12582 | Dusp16 | 0.0000 | No |
| 12583 | Dusp18 | 0.0000 | No |
| 12584 | Dusp19 | 0.0000 | No |
| 12585 | Dusp2  | 0.0000 | No |
| 12586 | Dusp21 | 0.0000 | No |
| 12587 | Dusp22 | 0.0000 | No |
| 12588 | Dusp23 | 0.0000 | No |
| 12589 | Dusp26 | 0.0000 | No |
| 12590 | Dusp27 | 0.0000 | No |
| 12591 | Dusp28 | 0.0000 | No |
| 12592 | Dusp4  | 0.0000 | No |
| 12593 | Dusp5  | 0.0000 | No |
| 12594 | Dusp6  | 0.0000 | No |
| 12595 | Dusp7  | 0.0000 | No |
| 12596 | Dusp8  | 0.0000 | No |
| 12597 | Dusp9  | 0.0000 | No |
| 12598 | Dut    | 0.0000 | No |
| 12599 | Dux    | 0.0000 | No |
| 12600 | Duxbl1 | 0.0000 | No |
| 12601 | Duxbl2 | 0.0000 | No |

|       |               |        |    |
|-------|---------------|--------|----|
| 12602 | Duxbl3        | 0.0000 | No |
| 12603 | Duxf1         | 0.0000 | No |
| 12604 | Duxf2         | 0.0000 | No |
| 12605 | Duxf3         | 0.0000 | No |
| 12606 | Duxf5         | 0.0000 | No |
| 12607 | Dvl1          | 0.0000 | No |
| 12608 | Dvl2          | 0.0000 | No |
| 12609 | Dxo           | 0.0000 | No |
| 12610 | Dydc1         | 0.0000 | No |
| 12611 | Dydc2         | 0.0000 | No |
| 12612 | Dym           | 0.0000 | No |
| 12613 | Dync1i1       | 0.0000 | No |
| 12614 | Dync1i2       | 0.0000 | No |
| 12615 | Dync1li1      | 0.0000 | No |
| 12616 | Dync1li2      | 0.0000 | No |
| 12617 | Dync2h1       | 0.0000 | No |
| 12618 | Dync2li1      | 0.0000 | No |
| 12619 | Dynll1        | 0.0000 | No |
| 12620 | Dynll2        | 0.0000 | No |
| 12621 | Dynlrb1       | 0.0000 | No |
| 12622 | Dynlrb2       | 0.0000 | No |
| 12623 | Dynlt1a       | 0.0000 | No |
| 12624 | Dynlt1b       | 0.0000 | No |
| 12625 | Dynlt1c       | 0.0000 | No |
| 12626 | Dynlt1f       | 0.0000 | No |
| 12627 | Dynlt1-ps1    | 0.0000 | No |
| 12628 | Dynlt3        | 0.0000 | No |
| 12629 | Dyrk1a        | 0.0000 | No |
| 12630 | Dyrk1b        | 0.0000 | No |
| 12631 | Dyrk2         | 0.0000 | No |
| 12632 | Dyrk3         | 0.0000 | No |
| 12633 | Dyrk4         | 0.0000 | No |
| 12634 | Dysf          | 0.0000 | No |
| 12635 | Dytn          | 0.0000 | No |
| 12636 | Dyx1c1        | 0.0000 | No |
| 12637 | Dzank1        | 0.0000 | No |
| 12638 | Dzip1         | 0.0000 | No |
| 12639 | Dzip1l        | 0.0000 | No |
| 12640 | Dzip3         | 0.0000 | No |
| 12641 | E030013I19Rik | 0.0000 | No |
| 12642 | E030018B13Rik | 0.0000 | No |
| 12643 | E030024N20Rik | 0.0000 | No |
| 12644 | E030025P04Rik | 0.0000 | No |
| 12645 | E030026E10Rik | 0.0000 | No |
| 12646 | E030030I06Rik | 0.0000 | No |
| 12647 | E030032P16Rik | 0.0000 | No |

|       |               |        |    |
|-------|---------------|--------|----|
| 12648 | E030037K01Rik | 0.0000 | No |
| 12649 | E030042O20Rik | 0.0000 | No |
| 12650 | E030044B06Rik | 0.0000 | No |
| 12651 | E130006D01Rik | 0.0000 | No |
| 12652 | E130012A19Rik | 0.0000 | No |
| 12653 | E130018N17Rik | 0.0000 | No |
| 12654 | E130018O15Rik | 0.0000 | No |
| 12655 | E130102H24Rik | 0.0000 | No |
| 12656 | E130111B04Rik | 0.0000 | No |
| 12657 | E130114P18Rik | 0.0000 | No |
| 12658 | E130116L18Rik | 0.0000 | No |
| 12659 | E130120K24Rik | 0.0000 | No |
| 12660 | E130208F15Rik | 0.0000 | No |
| 12661 | E130215H24Rik | 0.0000 | No |
| 12662 | E130304I02Rik | 0.0000 | No |
| 12663 | E130307A14Rik | 0.0000 | No |
| 12664 | E130308A19Rik | 0.0000 | No |
| 12665 | E130309D02Rik | 0.0000 | No |
| 12666 | E130311K13Rik | 0.0000 | No |
| 12667 | E130317F20Rik | 0.0000 | No |
| 12668 | E230001N04Rik | 0.0000 | No |
| 12669 | E230013L22Rik | 0.0000 | No |
| 12670 | E230015B07Rik | 0.0000 | No |
| 12671 | E230016K23Rik | 0.0000 | No |
| 12672 | E230016M11Rik | 0.0000 | No |
| 12673 | E230020D15Rik | 0.0000 | No |
| 12674 | E230025N22Rik | 0.0000 | No |
| 12675 | E230029C05Rik | 0.0000 | No |
| 12676 | E230032D23Rik | 0.0000 | No |
| 12677 | E2f1          | 0.0000 | No |
| 12678 | E2f2          | 0.0000 | No |
| 12679 | E2f3          | 0.0000 | No |
| 12680 | E2f4          | 0.0000 | No |
| 12681 | E2f5          | 0.0000 | No |
| 12682 | E2f6          | 0.0000 | No |
| 12683 | E2f7          | 0.0000 | No |
| 12684 | E2f8          | 0.0000 | No |
| 12685 | E330009J07Rik | 0.0000 | No |
| 12686 | E330010L02Rik | 0.0000 | No |
| 12687 | E330011O21Rik | 0.0000 | No |
| 12688 | E330012B07Rik | 0.0000 | No |
| 12689 | E330013P04Rik | 0.0000 | No |
| 12690 | E330014E10Rik | 0.0000 | No |
| 12691 | E330016L19Rik | 0.0000 | No |
| 12692 | E330017A01Rik | 0.0000 | No |
| 12693 | E330017L17Rik | 0.0000 | No |

|       |               |        |    |
|-------|---------------|--------|----|
| 12694 | E330018M18Rik | 0.0000 | No |
| 12695 | E330021D16Rik | 0.0000 | No |
| 12696 | E330023G01Rik | 0.0000 | No |
| 12697 | E330034G19Rik | 0.0000 | No |
| 12698 | E330034L11Rik | 0.0000 | No |
| 12699 | E330037G11Rik | 0.0000 | No |
| 12700 | E330040D14Rik | 0.0000 | No |
| 12701 | E430014B02Rik | 0.0000 | No |
| 12702 | E430018J23Rik | 0.0000 | No |
| 12703 | E430021H15Rik | 0.0000 | No |
| 12704 | E430024P14Rik | 0.0000 | No |
| 12705 | E430025E21Rik | 0.0000 | No |
| 12706 | E4f1          | 0.0000 | No |
| 12707 | E530001F21Rik | 0.0000 | No |
| 12708 | E530011L22Rik | 0.0000 | No |
| 12709 | Eaf1          | 0.0000 | No |
| 12710 | Eaf2          | 0.0000 | No |
| 12711 | Eapp          | 0.0000 | No |
| 12712 | Ear1          | 0.0000 | No |
| 12713 | Ear14         | 0.0000 | No |
| 12714 | Ear6          | 0.0000 | No |
| 12715 | Ear-ps10      | 0.0000 | No |
| 12716 | Ear-ps12      | 0.0000 | No |
| 12717 | Ear-ps2       | 0.0000 | No |
| 12718 | Ear-ps3       | 0.0000 | No |
| 12719 | Ear-ps4       | 0.0000 | No |
| 12720 | Ear-ps5       | 0.0000 | No |
| 12721 | Ear-ps7       | 0.0000 | No |
| 12722 | Ear-ps8       | 0.0000 | No |
| 12723 | Ear-ps9       | 0.0000 | No |
| 12724 | Ears2         | 0.0000 | No |
| 12725 | Ebag9         | 0.0000 | No |
| 12726 | Ebf2          | 0.0000 | No |
| 12727 | Ebf3          | 0.0000 | No |
| 12728 | Ebf4          | 0.0000 | No |
| 12729 | Ebi3          | 0.0000 | No |
| 12730 | Ebna1bp2      | 0.0000 | No |
| 12731 | Ebp           | 0.0000 | No |
| 12732 | Ebpl          | 0.0000 | No |
| 12733 | Ecd           | 0.0000 | No |
| 12734 | Ece1          | 0.0000 | No |
| 12735 | Ece2          | 0.0000 | No |
| 12736 | Ecel1         | 0.0000 | No |
| 12737 | Ech1          | 0.0000 | No |
| 12738 | Echdc1        | 0.0000 | No |
| 12739 | Echdc2        | 0.0000 | No |

|       |           |        |    |
|-------|-----------|--------|----|
| 12740 | Echs1     | 0.0000 | No |
| 12741 | Eci1      | 0.0000 | No |
| 12742 | Eci3      | 0.0000 | No |
| 12743 | Ecm1      | 0.0000 | No |
| 12744 | Ecm2      | 0.0000 | No |
| 12745 | Ecscr     | 0.0000 | No |
| 12746 | Ecsit     | 0.0000 | No |
| 12747 | Ect2      | 0.0000 | No |
| 12748 | Ect2l     | 0.0000 | No |
| 12749 | Eda       | 0.0000 | No |
| 12750 | Eda2r     | 0.0000 | No |
| 12751 | Edar      | 0.0000 | No |
| 12752 | Edaradd   | 0.0000 | No |
| 12753 | Edc3      | 0.0000 | No |
| 12754 | Edc4      | 0.0000 | No |
| 12755 | Eddm3b    | 0.0000 | No |
| 12756 | Edem2     | 0.0000 | No |
| 12757 | Edem3     | 0.0000 | No |
| 12758 | Edf1      | 0.0000 | No |
| 12759 | Edil3     | 0.0000 | No |
| 12760 | Edn1      | 0.0000 | No |
| 12761 | Edn2      | 0.0000 | No |
| 12762 | Edn3      | 0.0000 | No |
| 12763 | Ednra     | 0.0000 | No |
| 12764 | Ednrb     | 0.0000 | No |
| 12765 | Edrf1     | 0.0000 | No |
| 12766 | Eea1      | 0.0000 | No |
| 12767 | Eed       | 0.0000 | No |
| 12768 | Eef1a1    | 0.0000 | No |
| 12769 | Eef1a2    | 0.0000 | No |
| 12770 | Eef1akmt1 | 0.0000 | No |
| 12771 | Eef1b2    | 0.0000 | No |
| 12772 | Eef1d     | 0.0000 | No |
| 12773 | Eef1e1    | 0.0000 | No |
| 12774 | Eef1g     | 0.0000 | No |
| 12775 | Eef2      | 0.0000 | No |
| 12776 | Eef2k     | 0.0000 | No |
| 12777 | Eef2kmt   | 0.0000 | No |
| 12778 | Eefsec    | 0.0000 | No |
| 12779 | Eepd1     | 0.0000 | No |
| 12780 | Efcab1    | 0.0000 | No |
| 12781 | Efcab10   | 0.0000 | No |
| 12782 | Efcab11   | 0.0000 | No |
| 12783 | Efcab12   | 0.0000 | No |
| 12784 | Efcab14   | 0.0000 | No |
| 12785 | Efcab2    | 0.0000 | No |

|       |        |        |    |
|-------|--------|--------|----|
| 12786 | Efcab3 | 0.0000 | No |
| 12787 | Efcab5 | 0.0000 | No |
| 12788 | Efcab6 | 0.0000 | No |
| 12789 | Efcab7 | 0.0000 | No |
| 12790 | Efcab8 | 0.0000 | No |
| 12791 | Efcab9 | 0.0000 | No |
| 12792 | Efcc1  | 0.0000 | No |
| 12793 | Efemp1 | 0.0000 | No |
| 12794 | Efemp2 | 0.0000 | No |
| 12795 | Efhb   | 0.0000 | No |
| 12796 | Efhc1  | 0.0000 | No |
| 12797 | Efhc2  | 0.0000 | No |
| 12798 | Ehd1   | 0.0000 | No |
| 12799 | Ehd1os | 0.0000 | No |
| 12800 | Ehd2   | 0.0000 | No |
| 12801 | Efl1   | 0.0000 | No |
| 12802 | Efna3  | 0.0000 | No |
| 12803 | Efna4  | 0.0000 | No |
| 12804 | Efna5  | 0.0000 | No |
| 12805 | Efnb1  | 0.0000 | No |
| 12806 | Efnb2  | 0.0000 | No |
| 12807 | Efr3a  | 0.0000 | No |
| 12808 | Efr3b  | 0.0000 | No |
| 12809 | Efs    | 0.0000 | No |
| 12810 | Eftud2 | 0.0000 | No |
| 12811 | Egf    | 0.0000 | No |
| 12812 | Egfem1 | 0.0000 | No |
| 12813 | Egfl7  | 0.0000 | No |
| 12814 | Egfl8  | 0.0000 | No |
| 12815 | Egflam | 0.0000 | No |
| 12816 | Egfr   | 0.0000 | No |
| 12817 | Egfros | 0.0000 | No |
| 12818 | Egln1  | 0.0000 | No |
| 12819 | Egln2  | 0.0000 | No |
| 12820 | Egln3  | 0.0000 | No |
| 12821 | Egr1   | 0.0000 | No |
| 12822 | Egr2   | 0.0000 | No |
| 12823 | Egr3   | 0.0000 | No |
| 12824 | Egr4   | 0.0000 | No |
| 12825 | Ehbp1  | 0.0000 | No |
| 12826 | Ehd1   | 0.0000 | No |
| 12827 | Ehd2   | 0.0000 | No |
| 12828 | Ehd3   | 0.0000 | No |
| 12829 | Ehd4   | 0.0000 | No |
| 12830 | Ehf    | 0.0000 | No |
| 12831 | Ehhadh | 0.0000 | No |

|       |            |        |    |
|-------|------------|--------|----|
| 12832 | Ehmt1      | 0.0000 | No |
| 12833 | Ei24       | 0.0000 | No |
| 12834 | Eid1       | 0.0000 | No |
| 12835 | Eid2       | 0.0000 | No |
| 12836 | Eid2b      | 0.0000 | No |
| 12837 | Eid3       | 0.0000 | No |
| 12838 | Eif1       | 0.0000 | No |
| 12839 | Eif1a      | 0.0000 | No |
| 12840 | Eif1ad     | 0.0000 | No |
| 12841 | Eif1ax     | 0.0000 | No |
| 12842 | Eif1b      | 0.0000 | No |
| 12843 | Eif1-ps1   | 0.0000 | No |
| 12844 | Eif1-ps3   | 0.0000 | No |
| 12845 | Eif2a      | 0.0000 | No |
| 12846 | Eif2ak1    | 0.0000 | No |
| 12847 | Eif2ak2    | 0.0000 | No |
| 12848 | Eif2ak3    | 0.0000 | No |
| 12849 | Eif2ak4    | 0.0000 | No |
| 12850 | Eif2b1     | 0.0000 | No |
| 12851 | Eif2b2     | 0.0000 | No |
| 12852 | Eif2b3     | 0.0000 | No |
| 12853 | Eif2b4     | 0.0000 | No |
| 12854 | Eif2b5     | 0.0000 | No |
| 12855 | Eif2c5     | 0.0000 | No |
| 12856 | Eif2d      | 0.0000 | No |
| 12857 | Eif2s1     | 0.0000 | No |
| 12858 | Eif2s2     | 0.0000 | No |
| 12859 | Eif2s3x    | 0.0000 | No |
| 12860 | Eif2s3y    | 0.0000 | No |
| 12861 | Eif3a      | 0.0000 | No |
| 12862 | Eif3b      | 0.0000 | No |
| 12863 | Eif3c      | 0.0000 | No |
| 12864 | Eif3d      | 0.0000 | No |
| 12865 | Eif3e      | 0.0000 | No |
| 12866 | Eif3f      | 0.0000 | No |
| 12867 | Eif3g      | 0.0000 | No |
| 12868 | Eif3h      | 0.0000 | No |
| 12869 | Eif3i      | 0.0000 | No |
| 12870 | Eif3j1     | 0.0000 | No |
| 12871 | Eif3j2     | 0.0000 | No |
| 12872 | Eif3l      | 0.0000 | No |
| 12873 | Eif3m      | 0.0000 | No |
| 12874 | Eif3s6-ps1 | 0.0000 | No |
| 12875 | Eif3s6-ps2 | 0.0000 | No |
| 12876 | Eif3s6-ps4 | 0.0000 | No |
| 12877 | Eif4a1     | 0.0000 | No |



|       |            |        |    |
|-------|------------|--------|----|
| 12878 | Eif4a2     | 0.0000 | No |
| 12879 | Eif4a3     | 0.0000 | No |
| 12880 | Eif4a-ps4  | 0.0000 | No |
| 12881 | Eif4b      | 0.0000 | No |
| 12882 | Eif4e      | 0.0000 | No |
| 12883 | Eif4e1b    | 0.0000 | No |
| 12884 | Eif4e2     | 0.0000 | No |
| 12885 | Eif4e3     | 0.0000 | No |
| 12886 | Eif4ebp1   | 0.0000 | No |
| 12887 | Eif4ebp2   | 0.0000 | No |
| 12888 | Eif4ebp3   | 0.0000 | No |
| 12889 | Eif4enif1  | 0.0000 | No |
| 12890 | Eif4g1     | 0.0000 | No |
| 12891 | Eif4g2     | 0.0000 | No |
| 12892 | Eif4g3     | 0.0000 | No |
| 12893 | Eif4h      | 0.0000 | No |
| 12894 | Eif5       | 0.0000 | No |
| 12895 | Eif5a      | 0.0000 | No |
| 12896 | Eif5a2     | 0.0000 | No |
| 12897 | Eif5a13-ps | 0.0000 | No |
| 12898 | Eif5b      | 0.0000 | No |
| 12899 | Eif6       | 0.0000 | No |
| 12900 | Elac1      | 0.0000 | No |
| 12901 | Elac2      | 0.0000 | No |
| 12902 | Elavl1     | 0.0000 | No |
| 12903 | Elavl2     | 0.0000 | No |
| 12904 | Elavl3     | 0.0000 | No |
| 12905 | Elavl4     | 0.0000 | No |
| 12906 | Eldr       | 0.0000 | No |
| 12907 | Elf1       | 0.0000 | No |
| 12908 | Elf2       | 0.0000 | No |
| 12909 | Elf3       | 0.0000 | No |
| 12910 | Elf5       | 0.0000 | No |
| 12911 | Elfn1      | 0.0000 | No |
| 12912 | Elfn2      | 0.0000 | No |
| 12913 | Elk1       | 0.0000 | No |
| 12914 | Elk3       | 0.0000 | No |
| 12915 | Elk4       | 0.0000 | No |
| 12916 | Ell2       | 0.0000 | No |
| 12917 | Elmo1      | 0.0000 | No |
| 12918 | Elmo3      | 0.0000 | No |
| 12919 | Elmod1     | 0.0000 | No |
| 12920 | Elmod2     | 0.0000 | No |
| 12921 | Elmod3     | 0.0000 | No |
| 12922 | Eln        | 0.0000 | No |
| 12923 | Elof1      | 0.0000 | No |

|       |         |        |    |
|-------|---------|--------|----|
| 12924 | Elov11  | 0.0000 | No |
| 12925 | Elov12  | 0.0000 | No |
| 12926 | Elov13  | 0.0000 | No |
| 12927 | Elov14  | 0.0000 | No |
| 12928 | Elov15  | 0.0000 | No |
| 12929 | Elov16  | 0.0000 | No |
| 12930 | Elov17  | 0.0000 | No |
| 12931 | Elp2    | 0.0000 | No |
| 12932 | Elp3    | 0.0000 | No |
| 12933 | Elp4    | 0.0000 | No |
| 12934 | Elp5    | 0.0000 | No |
| 12935 | Elp6    | 0.0000 | No |
| 12936 | Emb     | 0.0000 | No |
| 12937 | Emc1    | 0.0000 | No |
| 12938 | Emc10   | 0.0000 | No |
| 12939 | Emc2    | 0.0000 | No |
| 12940 | Emc3    | 0.0000 | No |
| 12941 | Emc4    | 0.0000 | No |
| 12942 | Emc6    | 0.0000 | No |
| 12943 | Emc7    | 0.0000 | No |
| 12944 | Emc8    | 0.0000 | No |
| 12945 | Emc9    | 0.0000 | No |
| 12946 | Emcn    | 0.0000 | No |
| 12947 | Emd     | 0.0000 | No |
| 12948 | Eme1    | 0.0000 | No |
| 12949 | Eme2    | 0.0000 | No |
| 12950 | Emg1    | 0.0000 | No |
| 12951 | Emid1   | 0.0000 | No |
| 12952 | Emilin1 | 0.0000 | No |
| 12953 | Emilin2 | 0.0000 | No |
| 12954 | Emilin3 | 0.0000 | No |
| 12955 | Eml1    | 0.0000 | No |
| 12956 | Eml2    | 0.0000 | No |
| 12957 | Eml3    | 0.0000 | No |
| 12958 | Eml5    | 0.0000 | No |
| 12959 | Eml6    | 0.0000 | No |
| 12960 | Emp1    | 0.0000 | No |
| 12961 | Emp2    | 0.0000 | No |
| 12962 | Emp3    | 0.0000 | No |
| 12963 | Emsy    | 0.0000 | No |
| 12964 | Emx1    | 0.0000 | No |
| 12965 | Emx2    | 0.0000 | No |
| 12966 | Emx2os  | 0.0000 | No |
| 12967 | En1     | 0.0000 | No |
| 12968 | En2     | 0.0000 | No |
| 12969 | Enah    | 0.0000 | No |

|       |            |        |    |
|-------|------------|--------|----|
| 12970 | Enam       | 0.0000 | No |
| 12971 | Enc1       | 0.0000 | No |
| 12972 | Endod1     | 0.0000 | No |
| 12973 | Endog      | 0.0000 | No |
| 12974 | Endov      | 0.0000 | No |
| 12975 | Eng        | 0.0000 | No |
| 12976 | Engase     | 0.0000 | No |
| 12977 | Enkd1      | 0.0000 | No |
| 12978 | Enkur      | 0.0000 | No |
| 12979 | Eno1       | 0.0000 | No |
| 12980 | Eno1b      | 0.0000 | No |
| 12981 | Eno2       | 0.0000 | No |
| 12982 | Eno3       | 0.0000 | No |
| 12983 | Eno4       | 0.0000 | No |
| 12984 | Enoph1     | 0.0000 | No |
| 12985 | Enox1      | 0.0000 | No |
| 12986 | Enox2      | 0.0000 | No |
| 12987 | Enpep      | 0.0000 | No |
| 12988 | Enpp1      | 0.0000 | No |
| 12989 | Enpp2      | 0.0000 | No |
| 12990 | Enpp3      | 0.0000 | No |
| 12991 | Enpp6      | 0.0000 | No |
| 12992 | Ensa       | 0.0000 | No |
| 12993 | Enthd1     | 0.0000 | No |
| 12994 | Entpd1     | 0.0000 | No |
| 12995 | Entpd2     | 0.0000 | No |
| 12996 | Entpd3     | 0.0000 | No |
| 12997 | Entpd4     | 0.0000 | No |
| 12998 | Entpd5     | 0.0000 | No |
| 12999 | Entpd6     | 0.0000 | No |
| 13000 | Entpd7     | 0.0000 | No |
| 13001 | Eny2       | 0.0000 | No |
| 13002 | Eogt       | 0.0000 | No |
| 13003 | Eomes      | 0.0000 | No |
| 13004 | Ep300      | 0.0000 | No |
| 13005 | Ep400      | 0.0000 | No |
| 13006 | Epas1      | 0.0000 | No |
| 13007 | Epb41      | 0.0000 | No |
| 13008 | Epb4112    | 0.0000 | No |
| 13009 | Epb4113    | 0.0000 | No |
| 13010 | Epb4114a   | 0.0000 | No |
| 13011 | Epb4114aos | 0.0000 | No |
| 13012 | Epb4114b   | 0.0000 | No |
| 13013 | Epb42      | 0.0000 | No |
| 13014 | Epc1       | 0.0000 | No |
| 13015 | Epc2       | 0.0000 | No |

|       |          |        |    |
|-------|----------|--------|----|
| 13016 | Epcam    | 0.0000 | No |
| 13017 | Epdr1    | 0.0000 | No |
| 13018 | Epg5     | 0.0000 | No |
| 13019 | Epgn     | 0.0000 | No |
| 13020 | Epha1    | 0.0000 | No |
| 13021 | Epha10   | 0.0000 | No |
| 13022 | Epha2    | 0.0000 | No |
| 13023 | Epha3    | 0.0000 | No |
| 13024 | Epha4    | 0.0000 | No |
| 13025 | Epha5    | 0.0000 | No |
| 13026 | Epha6    | 0.0000 | No |
| 13027 | Epha7    | 0.0000 | No |
| 13028 | Ephb1    | 0.0000 | No |
| 13029 | Ephb2    | 0.0000 | No |
| 13030 | Ephb3    | 0.0000 | No |
| 13031 | Ephb4    | 0.0000 | No |
| 13032 | Ephb6    | 0.0000 | No |
| 13033 | Ephx1    | 0.0000 | No |
| 13034 | Ephx3    | 0.0000 | No |
| 13035 | Ephx4    | 0.0000 | No |
| 13036 | Epm2a    | 0.0000 | No |
| 13037 | Epm2aip1 | 0.0000 | No |
| 13038 | Epn1     | 0.0000 | No |
| 13039 | Epn2     | 0.0000 | No |
| 13040 | Epn3     | 0.0000 | No |
| 13041 | Epo      | 0.0000 | No |
| 13042 | Epor     | 0.0000 | No |
| 13043 | Eppin    | 0.0000 | No |
| 13044 | Eprs     | 0.0000 | No |
| 13045 | Eps15    | 0.0000 | No |
| 13046 | Eps15l1  | 0.0000 | No |
| 13047 | Eps8     | 0.0000 | No |
| 13048 | Eps8l1   | 0.0000 | No |
| 13049 | Epsti1   | 0.0000 | No |
| 13050 | Epx      | 0.0000 | No |
| 13051 | Epyc     | 0.0000 | No |
| 13052 | Eqtn     | 0.0000 | No |
| 13053 | Eral1    | 0.0000 | No |
| 13054 | Erap1    | 0.0000 | No |
| 13055 | Eras     | 0.0000 | No |
| 13056 | Erbp2    | 0.0000 | No |
| 13057 | Erbp3    | 0.0000 | No |
| 13058 | Erbp4    | 0.0000 | No |
| 13059 | Erbin    | 0.0000 | No |
| 13060 | Erc1     | 0.0000 | No |
| 13061 | Erc1     | 0.0000 | No |

|       |         |        |    |
|-------|---------|--------|----|
| 13062 | Ercc2   | 0.0000 | No |
| 13063 | Ercc3   | 0.0000 | No |
| 13064 | Ercc4   | 0.0000 | No |
| 13065 | Ercc5   | 0.0000 | No |
| 13066 | Ercc6   | 0.0000 | No |
| 13067 | Ercc6l  | 0.0000 | No |
| 13068 | Ercc6l2 | 0.0000 | No |
| 13069 | Ercc8   | 0.0000 | No |
| 13070 | Erdr1   | 0.0000 | No |
| 13071 | Ereg    | 0.0000 | No |
| 13072 | Erf     | 0.0000 | No |
| 13073 | Erg     | 0.0000 | No |
| 13074 | Ergic1  | 0.0000 | No |
| 13075 | Ergic2  | 0.0000 | No |
| 13076 | Ergic3  | 0.0000 | No |
| 13077 | Erh     | 0.0000 | No |
| 13078 | Eri1    | 0.0000 | No |
| 13079 | Eri2    | 0.0000 | No |
| 13080 | Eri3    | 0.0000 | No |
| 13081 | Erich1  | 0.0000 | No |
| 13082 | Erich3  | 0.0000 | No |
| 13083 | Erich4  | 0.0000 | No |
| 13084 | Erich5  | 0.0000 | No |
| 13085 | Erich6  | 0.0000 | No |
| 13086 | Erlec1  | 0.0000 | No |
| 13087 | Erlin1  | 0.0000 | No |
| 13088 | Erlin2  | 0.0000 | No |
| 13089 | Ermap   | 0.0000 | No |
| 13090 | Ermard  | 0.0000 | No |
| 13091 | Ermn    | 0.0000 | No |
| 13092 | Ermp1   | 0.0000 | No |
| 13093 | Ern1    | 0.0000 | No |
| 13094 | Ern2    | 0.0000 | No |
| 13095 | Ero1l   | 0.0000 | No |
| 13096 | Ero1lb  | 0.0000 | No |
| 13097 | Erp27   | 0.0000 | No |
| 13098 | Erp44   | 0.0000 | No |
| 13099 | Errfi1  | 0.0000 | No |
| 13100 | Erv3    | 0.0000 | No |
| 13101 | Esam    | 0.0000 | No |
| 13102 | Esco1   | 0.0000 | No |
| 13103 | Esco2   | 0.0000 | No |
| 13104 | Esd     | 0.0000 | No |
| 13105 | Esf1    | 0.0000 | No |
| 13106 | Esm1    | 0.0000 | No |
| 13107 | Esp16   | 0.0000 | No |

|       |         |        |    |
|-------|---------|--------|----|
| 13108 | Esp18   | 0.0000 | No |
| 13109 | Esp23   | 0.0000 | No |
| 13110 | Esp24   | 0.0000 | No |
| 13111 | Esp3    | 0.0000 | No |
| 13112 | Esp31   | 0.0000 | No |
| 13113 | Esp34   | 0.0000 | No |
| 13114 | Esp36   | 0.0000 | No |
| 13115 | Esp38   | 0.0000 | No |
| 13116 | Esp4    | 0.0000 | No |
| 13117 | Esp6    | 0.0000 | No |
| 13118 | Esp8    | 0.0000 | No |
| 13119 | Esp11   | 0.0000 | No |
| 13120 | Espn    | 0.0000 | No |
| 13121 | Espnl   | 0.0000 | No |
| 13122 | Esr1    | 0.0000 | No |
| 13123 | Esr2    | 0.0000 | No |
| 13124 | Esrp1   | 0.0000 | No |
| 13125 | Esrp2   | 0.0000 | No |
| 13126 | Esrra   | 0.0000 | No |
| 13127 | Esrrb   | 0.0000 | No |
| 13128 | Esrrg   | 0.0000 | No |
| 13129 | Esx1    | 0.0000 | No |
| 13130 | Esy1    | 0.0000 | No |
| 13131 | Esy2    | 0.0000 | No |
| 13132 | Esy3    | 0.0000 | No |
| 13133 | Etaa1   | 0.0000 | No |
| 13134 | Etaa1os | 0.0000 | No |
| 13135 | Etd     | 0.0000 | No |
| 13136 | Etfa    | 0.0000 | No |
| 13137 | Etfb    | 0.0000 | No |
| 13138 | Etfbkmt | 0.0000 | No |
| 13139 | Etfdh   | 0.0000 | No |
| 13140 | Ethe1   | 0.0000 | No |
| 13141 | Etl4    | 0.0000 | No |
| 13142 | Etnk1   | 0.0000 | No |
| 13143 | Etnppl  | 0.0000 | No |
| 13144 | Etohd2  | 0.0000 | No |
| 13145 | Etos1   | 0.0000 | No |
| 13146 | Ets1    | 0.0000 | No |
| 13147 | Ets2    | 0.0000 | No |
| 13148 | Etv2    | 0.0000 | No |
| 13149 | Etv3    | 0.0000 | No |
| 13150 | Etv31   | 0.0000 | No |
| 13151 | Etv4    | 0.0000 | No |
| 13152 | Etv5    | 0.0000 | No |
| 13153 | Etv6    | 0.0000 | No |

|       |          |        |    |
|-------|----------|--------|----|
| 13154 | EU599041 | 0.0000 | No |
| 13155 | Eva1a    | 0.0000 | No |
| 13156 | Eva1b    | 0.0000 | No |
| 13157 | Eva1c    | 0.0000 | No |
| 13158 | Evc      | 0.0000 | No |
| 13159 | Evi2a    | 0.0000 | No |
| 13160 | Evi2b    | 0.0000 | No |
| 13161 | Evi5     | 0.0000 | No |
| 13162 | Evi5l    | 0.0000 | No |
| 13163 | Evl      | 0.0000 | No |
| 13164 | Evpl     | 0.0000 | No |
| 13165 | Evx1     | 0.0000 | No |
| 13166 | Evx1os   | 0.0000 | No |
| 13167 | Evx2     | 0.0000 | No |
| 13168 | Ewsr1    | 0.0000 | No |
| 13169 | Exd1     | 0.0000 | No |
| 13170 | Exd2     | 0.0000 | No |
| 13171 | Exo1     | 0.0000 | No |
| 13172 | Exo5     | 0.0000 | No |
| 13173 | Exoc1    | 0.0000 | No |
| 13174 | Exoc2    | 0.0000 | No |
| 13175 | Exoc3    | 0.0000 | No |
| 13176 | Exoc3l   | 0.0000 | No |
| 13177 | Exoc3l2  | 0.0000 | No |
| 13178 | Exoc3l4  | 0.0000 | No |
| 13179 | Exoc4    | 0.0000 | No |
| 13180 | Exoc5    | 0.0000 | No |
| 13181 | Exoc6    | 0.0000 | No |
| 13182 | Exoc6b   | 0.0000 | No |
| 13183 | Exoc8    | 0.0000 | No |
| 13184 | Exog     | 0.0000 | No |
| 13185 | Exosc1   | 0.0000 | No |
| 13186 | Exosc10  | 0.0000 | No |
| 13187 | Exosc2   | 0.0000 | No |
| 13188 | Exosc3   | 0.0000 | No |
| 13189 | Exosc4   | 0.0000 | No |
| 13190 | Exosc5   | 0.0000 | No |
| 13191 | Exosc6   | 0.0000 | No |
| 13192 | Exosc7   | 0.0000 | No |
| 13193 | Exosc9   | 0.0000 | No |
| 13194 | Exph5    | 0.0000 | No |
| 13195 | Ext1     | 0.0000 | No |
| 13196 | Ext2     | 0.0000 | No |
| 13197 | Extl2    | 0.0000 | No |
| 13198 | Extl3    | 0.0000 | No |
| 13199 | Eya1     | 0.0000 | No |

|       |               |        |    |
|-------|---------------|--------|----|
| 13200 | Eya3          | 0.0000 | No |
| 13201 | Eya4          | 0.0000 | No |
| 13202 | Ezh2          | 0.0000 | No |
| 13203 | Ezr           | 0.0000 | No |
| 13204 | F12           | 0.0000 | No |
| 13205 | F13a1         | 0.0000 | No |
| 13206 | F13b          | 0.0000 | No |
| 13207 | F2            | 0.0000 | No |
| 13208 | F2r11         | 0.0000 | No |
| 13209 | F2r13         | 0.0000 | No |
| 13210 | F3            | 0.0000 | No |
| 13211 | F420014N23Rik | 0.0000 | No |
| 13212 | F5            | 0.0000 | No |
| 13213 | F630028O10Rik | 0.0000 | No |
| 13214 | F630206G17Rik | 0.0000 | No |
| 13215 | F7            | 0.0000 | No |
| 13216 | F730016J06Rik | 0.0000 | No |
| 13217 | F730043M19Rik | 0.0000 | No |
| 13218 | F730311O21Rik | 0.0000 | No |
| 13219 | F8            | 0.0000 | No |
| 13220 | F830016B08Rik | 0.0000 | No |
| 13221 | F830045P16Rik | 0.0000 | No |
| 13222 | F830112A20Rik | 0.0000 | No |
| 13223 | F830115B05Rik | 0.0000 | No |
| 13224 | F830208F22Rik | 0.0000 | No |
| 13225 | F830212C03Rik | 0.0000 | No |
| 13226 | F8a           | 0.0000 | No |
| 13227 | F9            | 0.0000 | No |
| 13228 | F930015N05Rik | 0.0000 | No |
| 13229 | F930017D23Rik | 0.0000 | No |
| 13230 | Fa2h          | 0.0000 | No |
| 13231 | Faah          | 0.0000 | No |
| 13232 | Faap100       | 0.0000 | No |
| 13233 | Faap20        | 0.0000 | No |
| 13234 | Faap24        | 0.0000 | No |
| 13235 | Fabp12        | 0.0000 | No |
| 13236 | Fabp3-ps1     | 0.0000 | No |
| 13237 | Fabp4         | 0.0000 | No |
| 13238 | Fabp5         | 0.0000 | No |
| 13239 | Fabp5l2       | 0.0000 | No |
| 13240 | Fabp6         | 0.0000 | No |
| 13241 | Fabp9         | 0.0000 | No |
| 13242 | Fadd          | 0.0000 | No |
| 13243 | Faddos        | 0.0000 | No |
| 13244 | Fads1         | 0.0000 | No |
| 13245 | Fads2         | 0.0000 | No |



|       |           |        |    |
|-------|-----------|--------|----|
| 13246 | Fads3     | 0.0000 | No |
| 13247 | Fads6     | 0.0000 | No |
| 13248 | Faf1      | 0.0000 | No |
| 13249 | Faf2      | 0.0000 | No |
| 13250 | Fah       | 0.0000 | No |
| 13251 | Fahd1     | 0.0000 | No |
| 13252 | Fahd2a    | 0.0000 | No |
| 13253 | Faim      | 0.0000 | No |
| 13254 | Faim2     | 0.0000 | No |
| 13255 | Fam102a   | 0.0000 | No |
| 13256 | Fam102b   | 0.0000 | No |
| 13257 | Fam103a1  | 0.0000 | No |
| 13258 | Fam104a   | 0.0000 | No |
| 13259 | Fam105a   | 0.0000 | No |
| 13260 | Fam107a   | 0.0000 | No |
| 13261 | Fam107b   | 0.0000 | No |
| 13262 | Fam109a   | 0.0000 | No |
| 13263 | Fam109b   | 0.0000 | No |
| 13264 | Fam110a   | 0.0000 | No |
| 13265 | Fam110b   | 0.0000 | No |
| 13266 | Fam110c   | 0.0000 | No |
| 13267 | Fam111a   | 0.0000 | No |
| 13268 | Fam114a1  | 0.0000 | No |
| 13269 | Fam114a2  | 0.0000 | No |
| 13270 | Fam117a   | 0.0000 | No |
| 13271 | Fam117b   | 0.0000 | No |
| 13272 | Fam118a   | 0.0000 | No |
| 13273 | Fam118b   | 0.0000 | No |
| 13274 | Fam120a   | 0.0000 | No |
| 13275 | Fam120aos | 0.0000 | No |
| 13276 | Fam120b   | 0.0000 | No |
| 13277 | Fam120c   | 0.0000 | No |
| 13278 | Fam122a   | 0.0000 | No |
| 13279 | Fam122b   | 0.0000 | No |
| 13280 | Fam122c   | 0.0000 | No |
| 13281 | Fam124a   | 0.0000 | No |
| 13282 | Fam126a   | 0.0000 | No |
| 13283 | Fam126b   | 0.0000 | No |
| 13284 | Fam129a   | 0.0000 | No |
| 13285 | Fam129b   | 0.0000 | No |
| 13286 | Fam131a   | 0.0000 | No |
| 13287 | Fam131b   | 0.0000 | No |
| 13288 | Fam131c   | 0.0000 | No |
| 13289 | Fam132a   | 0.0000 | No |
| 13290 | Fam132b   | 0.0000 | No |
| 13291 | Fam133b   | 0.0000 | No |

|       |            |        |    |
|-------|------------|--------|----|
| 13292 | Fam134a    | 0.0000 | No |
| 13293 | Fam134b    | 0.0000 | No |
| 13294 | Fam134c    | 0.0000 | No |
| 13295 | Fam135a    | 0.0000 | No |
| 13296 | Fam135b    | 0.0000 | No |
| 13297 | Fam136a    | 0.0000 | No |
| 13298 | Fam136b-ps | 0.0000 | No |
| 13299 | Fam13a     | 0.0000 | No |
| 13300 | Fam149a    | 0.0000 | No |
| 13301 | Fam149b    | 0.0000 | No |
| 13302 | Fam150b    | 0.0000 | No |
| 13303 | Fam151b    | 0.0000 | No |
| 13304 | Fam155a    | 0.0000 | No |
| 13305 | Fam159b    | 0.0000 | No |
| 13306 | Fam160a1   | 0.0000 | No |
| 13307 | Fam160a2   | 0.0000 | No |
| 13308 | Fam160b1   | 0.0000 | No |
| 13309 | Fam160b2   | 0.0000 | No |
| 13310 | Fam161a    | 0.0000 | No |
| 13311 | Fam161b    | 0.0000 | No |
| 13312 | Fam162a    | 0.0000 | No |
| 13313 | Fam163a    | 0.0000 | No |
| 13314 | Fam163b    | 0.0000 | No |
| 13315 | Fam166a    | 0.0000 | No |
| 13316 | Fam166b    | 0.0000 | No |
| 13317 | Fam167a    | 0.0000 | No |
| 13318 | Fam167b    | 0.0000 | No |
| 13319 | Fam168a    | 0.0000 | No |
| 13320 | Fam168b    | 0.0000 | No |
| 13321 | Fam169a    | 0.0000 | No |
| 13322 | Fam170a    | 0.0000 | No |
| 13323 | Fam171a1   | 0.0000 | No |
| 13324 | Fam171a2   | 0.0000 | No |
| 13325 | Fam171b    | 0.0000 | No |
| 13326 | Fam172a    | 0.0000 | No |
| 13327 | Fam173a    | 0.0000 | No |
| 13328 | Fam173b    | 0.0000 | No |
| 13329 | Fam174a    | 0.0000 | No |
| 13330 | Fam174b    | 0.0000 | No |
| 13331 | Fam175a    | 0.0000 | No |
| 13332 | Fam175b    | 0.0000 | No |
| 13333 | Fam177a    | 0.0000 | No |
| 13334 | Fam178a    | 0.0000 | No |
| 13335 | Fam178b    | 0.0000 | No |
| 13336 | Fam179b    | 0.0000 | No |
| 13337 | Fam181a    | 0.0000 | No |

|       |             |        |    |
|-------|-------------|--------|----|
| 13338 | Fam181b     | 0.0000 | No |
| 13339 | Fam183b     | 0.0000 | No |
| 13340 | Fam184a     | 0.0000 | No |
| 13341 | Fam184b     | 0.0000 | No |
| 13342 | Fam185a     | 0.0000 | No |
| 13343 | Fam186a     | 0.0000 | No |
| 13344 | Fam186b     | 0.0000 | No |
| 13345 | Fam187a     | 0.0000 | No |
| 13346 | Fam187b     | 0.0000 | No |
| 13347 | Fam188a     | 0.0000 | No |
| 13348 | Fam188b     | 0.0000 | No |
| 13349 | Fam188b2-ps | 0.0000 | No |
| 13350 | Fam189a1    | 0.0000 | No |
| 13351 | Fam189a2    | 0.0000 | No |
| 13352 | Fam189b     | 0.0000 | No |
| 13353 | Fam192a     | 0.0000 | No |
| 13354 | Fam193a     | 0.0000 | No |
| 13355 | Fam193b     | 0.0000 | No |
| 13356 | Fam195a     | 0.0000 | No |
| 13357 | Fam195b     | 0.0000 | No |
| 13358 | Fam196a     | 0.0000 | No |
| 13359 | Fam198a     | 0.0000 | No |
| 13360 | Fam198b     | 0.0000 | No |
| 13361 | Fam199x     | 0.0000 | No |
| 13362 | Fam19a1     | 0.0000 | No |
| 13363 | Fam19a2     | 0.0000 | No |
| 13364 | Fam19a4     | 0.0000 | No |
| 13365 | Fam19a5     | 0.0000 | No |
| 13366 | Fam204a     | 0.0000 | No |
| 13367 | Fam205a1    | 0.0000 | No |
| 13368 | Fam205a2    | 0.0000 | No |
| 13369 | Fam205a3    | 0.0000 | No |
| 13370 | Fam205a4    | 0.0000 | No |
| 13371 | Fam205c     | 0.0000 | No |
| 13372 | Fam206a     | 0.0000 | No |
| 13373 | Fam207a     | 0.0000 | No |
| 13374 | Fam208a     | 0.0000 | No |
| 13375 | Fam208b     | 0.0000 | No |
| 13376 | Fam209      | 0.0000 | No |
| 13377 | Fam20a      | 0.0000 | No |
| 13378 | Fam20c      | 0.0000 | No |
| 13379 | Fam21       | 0.0000 | No |
| 13380 | Fam210a     | 0.0000 | No |
| 13381 | Fam212a     | 0.0000 | No |
| 13382 | Fam212b     | 0.0000 | No |
| 13383 | Fam213a     | 0.0000 | No |

|       |           |        |    |
|-------|-----------|--------|----|
| 13384 | Fam213b   | 0.0000 | No |
| 13385 | Fam214a   | 0.0000 | No |
| 13386 | Fam214b   | 0.0000 | No |
| 13387 | Fam216a   | 0.0000 | No |
| 13388 | Fam216b   | 0.0000 | No |
| 13389 | Fam217b   | 0.0000 | No |
| 13390 | Fam219a   | 0.0000 | No |
| 13391 | Fam219aos | 0.0000 | No |
| 13392 | Fam219b   | 0.0000 | No |
| 13393 | Fam220a   | 0.0000 | No |
| 13394 | Fam220-ps | 0.0000 | No |
| 13395 | Fam221a   | 0.0000 | No |
| 13396 | Fam221b   | 0.0000 | No |
| 13397 | Fam222a   | 0.0000 | No |
| 13398 | Fam222b   | 0.0000 | No |
| 13399 | Fam227a   | 0.0000 | No |
| 13400 | Fam227b   | 0.0000 | No |
| 13401 | Fam228a   | 0.0000 | No |
| 13402 | Fam228b   | 0.0000 | No |
| 13403 | Fam229b   | 0.0000 | No |
| 13404 | Fam234a   | 0.0000 | No |
| 13405 | Fam234b   | 0.0000 | No |
| 13406 | Fam24a    | 0.0000 | No |
| 13407 | Fam26d    | 0.0000 | No |
| 13408 | Fam26e    | 0.0000 | No |
| 13409 | Fam26f    | 0.0000 | No |
| 13410 | Fam32a    | 0.0000 | No |
| 13411 | Fam35a    | 0.0000 | No |
| 13412 | Fam3a     | 0.0000 | No |
| 13413 | Fam3b     | 0.0000 | No |
| 13414 | Fam3c     | 0.0000 | No |
| 13415 | Fam43b    | 0.0000 | No |
| 13416 | Fam45a    | 0.0000 | No |
| 13417 | Fam46a    | 0.0000 | No |
| 13418 | Fam46b    | 0.0000 | No |
| 13419 | Fam46c    | 0.0000 | No |
| 13420 | Fam46d    | 0.0000 | No |
| 13421 | Fam47c    | 0.0000 | No |
| 13422 | Fam47e    | 0.0000 | No |
| 13423 | Fam49a    | 0.0000 | No |
| 13424 | Fam49b    | 0.0000 | No |
| 13425 | Fam50a    | 0.0000 | No |
| 13426 | Fam53a    | 0.0000 | No |
| 13427 | Fam53b    | 0.0000 | No |
| 13428 | Fam53c    | 0.0000 | No |
| 13429 | Fam57a    | 0.0000 | No |

|       |          |        |    |
|-------|----------|--------|----|
| 13430 | Fam58b   | 0.0000 | No |
| 13431 | Fam60a   | 0.0000 | No |
| 13432 | Fam63a   | 0.0000 | No |
| 13433 | Fam63b   | 0.0000 | No |
| 13434 | Fam64a   | 0.0000 | No |
| 13435 | Fam65a   | 0.0000 | No |
| 13436 | Fam65b   | 0.0000 | No |
| 13437 | Fam65c   | 0.0000 | No |
| 13438 | Fam69a   | 0.0000 | No |
| 13439 | Fam69b   | 0.0000 | No |
| 13440 | Fam69c   | 0.0000 | No |
| 13441 | Fam71a   | 0.0000 | No |
| 13442 | Fam71b   | 0.0000 | No |
| 13443 | Fam71d   | 0.0000 | No |
| 13444 | Fam71e1  | 0.0000 | No |
| 13445 | Fam71e2  | 0.0000 | No |
| 13446 | Fam71f1  | 0.0000 | No |
| 13447 | Fam71f2  | 0.0000 | No |
| 13448 | Fam72a   | 0.0000 | No |
| 13449 | Fam76a   | 0.0000 | No |
| 13450 | Fam76b   | 0.0000 | No |
| 13451 | Fam78a   | 0.0000 | No |
| 13452 | Fam81a   | 0.0000 | No |
| 13453 | Fam81b   | 0.0000 | No |
| 13454 | Fam83b   | 0.0000 | No |
| 13455 | Fam83d   | 0.0000 | No |
| 13456 | Fam83e   | 0.0000 | No |
| 13457 | Fam83f   | 0.0000 | No |
| 13458 | Fam83g   | 0.0000 | No |
| 13459 | Fam83h   | 0.0000 | No |
| 13460 | Fam84a   | 0.0000 | No |
| 13461 | Fam84b   | 0.0000 | No |
| 13462 | Fam89a   | 0.0000 | No |
| 13463 | Fam89b   | 0.0000 | No |
| 13464 | Fam8a1   | 0.0000 | No |
| 13465 | Fam90a1a | 0.0000 | No |
| 13466 | Fam90a1b | 0.0000 | No |
| 13467 | Fam91a1  | 0.0000 | No |
| 13468 | Fam92a   | 0.0000 | No |
| 13469 | Fam92b   | 0.0000 | No |
| 13470 | Fam96a   | 0.0000 | No |
| 13471 | Fam96b   | 0.0000 | No |
| 13472 | Fam98a   | 0.0000 | No |
| 13473 | Fam98b   | 0.0000 | No |
| 13474 | Fam98c   | 0.0000 | No |
| 13475 | Fan1     | 0.0000 | No |

|       |          |        |    |
|-------|----------|--------|----|
| 13476 | Fanca    | 0.0000 | No |
| 13477 | Fancb    | 0.0000 | No |
| 13478 | Fancc    | 0.0000 | No |
| 13479 | Fancd2   | 0.0000 | No |
| 13480 | Fancd2os | 0.0000 | No |
| 13481 | Fance    | 0.0000 | No |
| 13482 | Fancf    | 0.0000 | No |
| 13483 | Fancg    | 0.0000 | No |
| 13484 | Fanci    | 0.0000 | No |
| 13485 | Fanc1    | 0.0000 | No |
| 13486 | Fancm    | 0.0000 | No |
| 13487 | Fank1    | 0.0000 | No |
| 13488 | Fap      | 0.0000 | No |
| 13489 | Far1os   | 0.0000 | No |
| 13490 | Far2     | 0.0000 | No |
| 13491 | Far2os2  | 0.0000 | No |
| 13492 | Farp1    | 0.0000 | No |
| 13493 | Farp2    | 0.0000 | No |
| 13494 | Fars2    | 0.0000 | No |
| 13495 | Farsa    | 0.0000 | No |
| 13496 | Farsb    | 0.0000 | No |
| 13497 | Fas      | 0.0000 | No |
| 13498 | Fas1     | 0.0000 | No |
| 13499 | Fasn     | 0.0000 | No |
| 13500 | Fastk    | 0.0000 | No |
| 13501 | Fastkd1  | 0.0000 | No |
| 13502 | Fastkd2  | 0.0000 | No |
| 13503 | Fastkd3  | 0.0000 | No |
| 13504 | Fastkd5  | 0.0000 | No |
| 13505 | Fat1     | 0.0000 | No |
| 13506 | Fat2     | 0.0000 | No |
| 13507 | Fat4     | 0.0000 | No |
| 13508 | Fate1    | 0.0000 | No |
| 13509 | Fau      | 0.0000 | No |
| 13510 | Fau-ps1  | 0.0000 | No |
| 13511 | Fau-ps2  | 0.0000 | No |
| 13512 | Faxc     | 0.0000 | No |
| 13513 | Fbf1     | 0.0000 | No |
| 13514 | Fbl      | 0.0000 | No |
| 13515 | Fblim1   | 0.0000 | No |
| 13516 | Fbln1    | 0.0000 | No |
| 13517 | Fbln5    | 0.0000 | No |
| 13518 | Fbn1     | 0.0000 | No |
| 13519 | Fbn2     | 0.0000 | No |
| 13520 | Fbp1     | 0.0000 | No |
| 13521 | Fbp2     | 0.0000 | No |

|       |          |        |    |
|-------|----------|--------|----|
| 13522 | Fbrs     | 0.0000 | No |
| 13523 | Fbrsl1   | 0.0000 | No |
| 13524 | Fbxl12   | 0.0000 | No |
| 13525 | Fbxl12os | 0.0000 | No |
| 13526 | Fbxl13   | 0.0000 | No |
| 13527 | Fbxl14   | 0.0000 | No |
| 13528 | Fbxl15   | 0.0000 | No |
| 13529 | Fbxl16   | 0.0000 | No |
| 13530 | Fbxl17   | 0.0000 | No |
| 13531 | Fbxl18   | 0.0000 | No |
| 13532 | Fbxl19   | 0.0000 | No |
| 13533 | Fbxl2    | 0.0000 | No |
| 13534 | Fbxl20   | 0.0000 | No |
| 13535 | Fbxl21   | 0.0000 | No |
| 13536 | Fbxl22   | 0.0000 | No |
| 13537 | Fbxl3    | 0.0000 | No |
| 13538 | Fbxl4    | 0.0000 | No |
| 13539 | Fbxl5    | 0.0000 | No |
| 13540 | Fbxl6    | 0.0000 | No |
| 13541 | Fbxl7    | 0.0000 | No |
| 13542 | Fbxl8    | 0.0000 | No |
| 13543 | Fbxo10   | 0.0000 | No |
| 13544 | Fbxo11   | 0.0000 | No |
| 13545 | Fbxo15   | 0.0000 | No |
| 13546 | Fbxo16   | 0.0000 | No |
| 13547 | Fbxo17   | 0.0000 | No |
| 13548 | Fbxo18   | 0.0000 | No |
| 13549 | Fbxo2    | 0.0000 | No |
| 13550 | Fbxo21   | 0.0000 | No |
| 13551 | Fbxo22   | 0.0000 | No |
| 13552 | Fbxo24   | 0.0000 | No |
| 13553 | Fbxo25   | 0.0000 | No |
| 13554 | Fbxo28   | 0.0000 | No |
| 13555 | Fbxo3    | 0.0000 | No |
| 13556 | Fbxo30   | 0.0000 | No |
| 13557 | Fbxo31   | 0.0000 | No |
| 13558 | Fbxo32   | 0.0000 | No |
| 13559 | Fbxo33   | 0.0000 | No |
| 13560 | Fbxo34   | 0.0000 | No |
| 13561 | Fbxo36   | 0.0000 | No |
| 13562 | Fbxo38   | 0.0000 | No |
| 13563 | Fbxo39   | 0.0000 | No |
| 13564 | Fbxo4    | 0.0000 | No |
| 13565 | Fbxo40   | 0.0000 | No |
| 13566 | Fbxo41   | 0.0000 | No |
| 13567 | Fbxo42   | 0.0000 | No |

|       |        |        |    |
|-------|--------|--------|----|
| 13568 | Fbxo43 | 0.0000 | No |
| 13569 | Fbxo44 | 0.0000 | No |
| 13570 | Fbxo45 | 0.0000 | No |
| 13571 | Fbxo46 | 0.0000 | No |
| 13572 | Fbxo47 | 0.0000 | No |
| 13573 | Fbxo48 | 0.0000 | No |
| 13574 | Fbxo5  | 0.0000 | No |
| 13575 | Fbxo6  | 0.0000 | No |
| 13576 | Fbxo7  | 0.0000 | No |
| 13577 | Fbxo8  | 0.0000 | No |
| 13578 | Fbxw10 | 0.0000 | No |
| 13579 | Fbxw11 | 0.0000 | No |
| 13580 | Fbxw13 | 0.0000 | No |
| 13581 | Fbxw15 | 0.0000 | No |
| 13582 | Fbxw16 | 0.0000 | No |
| 13583 | Fbxw17 | 0.0000 | No |
| 13584 | Fbxw18 | 0.0000 | No |
| 13585 | Fbxw19 | 0.0000 | No |
| 13586 | Fbxw2  | 0.0000 | No |
| 13587 | Fbxw21 | 0.0000 | No |
| 13588 | Fbxw22 | 0.0000 | No |
| 13589 | Fbxw23 | 0.0000 | No |
| 13590 | Fbxw24 | 0.0000 | No |
| 13591 | Fbxw25 | 0.0000 | No |
| 13592 | Fbxw26 | 0.0000 | No |
| 13593 | Fbxw27 | 0.0000 | No |
| 13594 | Fbxw28 | 0.0000 | No |
| 13595 | Fbxw4  | 0.0000 | No |
| 13596 | Fbxw5  | 0.0000 | No |
| 13597 | Fbxw7  | 0.0000 | No |
| 13598 | Fbxw8  | 0.0000 | No |
| 13599 | Fbxw9  | 0.0000 | No |
| 13600 | Fcamr  | 0.0000 | No |
| 13601 | Fcer1a | 0.0000 | No |
| 13602 | Fcer2a | 0.0000 | No |
| 13603 | Fcf1   | 0.0000 | No |
| 13604 | Fcgbp  | 0.0000 | No |
| 13605 | Fcgr1  | 0.0000 | No |
| 13606 | Fcgr4  | 0.0000 | No |
| 13607 | Fcgrt  | 0.0000 | No |
| 13608 | Fcho1  | 0.0000 | No |
| 13609 | Fchsd1 | 0.0000 | No |
| 13610 | Fchsd2 | 0.0000 | No |
| 13611 | Fcmr   | 0.0000 | No |
| 13612 | Fcna   | 0.0000 | No |
| 13613 | Fcnaos | 0.0000 | No |



|       |         |        |    |
|-------|---------|--------|----|
| 13614 | Fcor    | 0.0000 | No |
| 13615 | Fcrl5   | 0.0000 | No |
| 13616 | Fcrl6   | 0.0000 | No |
| 13617 | Fcrlb   | 0.0000 | No |
| 13618 | Fcr1s   | 0.0000 | No |
| 13619 | Fdft1   | 0.0000 | No |
| 13620 | Fdps    | 0.0000 | No |
| 13621 | Fdx1    | 0.0000 | No |
| 13622 | Fdx11   | 0.0000 | No |
| 13623 | Fdxacb1 | 0.0000 | No |
| 13624 | Fdxr    | 0.0000 | No |
| 13625 | Fem1a   | 0.0000 | No |
| 13626 | Fem1b   | 0.0000 | No |
| 13627 | Fem1c   | 0.0000 | No |
| 13628 | Fen1    | 0.0000 | No |
| 13629 | Fendrr  | 0.0000 | No |
| 13630 | Fer114  | 0.0000 | No |
| 13631 | Fer115  | 0.0000 | No |
| 13632 | Fer116  | 0.0000 | No |
| 13633 | Fermt1  | 0.0000 | No |
| 13634 | Fermt3  | 0.0000 | No |
| 13635 | Fetub   | 0.0000 | No |
| 13636 | Fez1    | 0.0000 | No |
| 13637 | Fez2    | 0.0000 | No |
| 13638 | Fezf1   | 0.0000 | No |
| 13639 | Fezf2   | 0.0000 | No |
| 13640 | Ffar1   | 0.0000 | No |
| 13641 | Ffar2   | 0.0000 | No |
| 13642 | Fga     | 0.0000 | No |
| 13643 | Fgb     | 0.0000 | No |
| 13644 | Fgd1    | 0.0000 | No |
| 13645 | Fgd3    | 0.0000 | No |
| 13646 | Fgd4    | 0.0000 | No |
| 13647 | Fgd5    | 0.0000 | No |
| 13648 | Fgd6    | 0.0000 | No |
| 13649 | Fgf1    | 0.0000 | No |
| 13650 | Fgf10   | 0.0000 | No |
| 13651 | Fgf11   | 0.0000 | No |
| 13652 | Fgf12   | 0.0000 | No |
| 13653 | Fgf13   | 0.0000 | No |
| 13654 | Fgf14   | 0.0000 | No |
| 13655 | Fgf16   | 0.0000 | No |
| 13656 | Fgf17   | 0.0000 | No |
| 13657 | Fgf2    | 0.0000 | No |
| 13658 | Fgf20   | 0.0000 | No |
| 13659 | Fgf21   | 0.0000 | No |

|       |          |        |    |
|-------|----------|--------|----|
| 13660 | Fgf23    | 0.0000 | No |
| 13661 | Fgf2os   | 0.0000 | No |
| 13662 | Fgf4     | 0.0000 | No |
| 13663 | Fgf5     | 0.0000 | No |
| 13664 | Fgf6     | 0.0000 | No |
| 13665 | Fgf7     | 0.0000 | No |
| 13666 | Fgf8     | 0.0000 | No |
| 13667 | Fgf9     | 0.0000 | No |
| 13668 | Fgfbp1   | 0.0000 | No |
| 13669 | Fgfbp3   | 0.0000 | No |
| 13670 | Fgfr1    | 0.0000 | No |
| 13671 | Fgfr1op  | 0.0000 | No |
| 13672 | Fgfr1op2 | 0.0000 | No |
| 13673 | Fgfr2    | 0.0000 | No |
| 13674 | Fgfr3    | 0.0000 | No |
| 13675 | Fgfr3-ps | 0.0000 | No |
| 13676 | Fgfr4    | 0.0000 | No |
| 13677 | Fgfrl1   | 0.0000 | No |
| 13678 | Fggy     | 0.0000 | No |
| 13679 | Fgl1     | 0.0000 | No |
| 13680 | Fgr      | 0.0000 | No |
| 13681 | Fh1      | 0.0000 | No |
| 13682 | Fhad1    | 0.0000 | No |
| 13683 | Fhad1os1 | 0.0000 | No |
| 13684 | Fhad1os2 | 0.0000 | No |
| 13685 | Fhdc1    | 0.0000 | No |
| 13686 | Fhit     | 0.0000 | No |
| 13687 | Fhitos   | 0.0000 | No |
| 13688 | Fhl1     | 0.0000 | No |
| 13689 | Fhl3     | 0.0000 | No |
| 13690 | Fhl4     | 0.0000 | No |
| 13691 | Fhod1    | 0.0000 | No |
| 13692 | Fhod3    | 0.0000 | No |
| 13693 | Fibcd1   | 0.0000 | No |
| 13694 | Fibp     | 0.0000 | No |
| 13695 | Ficd     | 0.0000 | No |
| 13696 | Fig4     | 0.0000 | No |
| 13697 | Figm     | 0.0000 | No |
| 13698 | Figm1    | 0.0000 | No |
| 13699 | Filip1   | 0.0000 | No |
| 13700 | Fip111   | 0.0000 | No |
| 13701 | Firre    | 0.0000 | No |
| 13702 | Fis1     | 0.0000 | No |
| 13703 | Fitm1    | 0.0000 | No |
| 13704 | Fitm2    | 0.0000 | No |
| 13705 | Fiz1     | 0.0000 | No |

|       |         |        |    |
|-------|---------|--------|----|
| 13706 | Fjx1    | 0.0000 | No |
| 13707 | Fkbp10  | 0.0000 | No |
| 13708 | Fkbp11  | 0.0000 | No |
| 13709 | Fkbp15  | 0.0000 | No |
| 13710 | Fkbp1b  | 0.0000 | No |
| 13711 | Fkbp2   | 0.0000 | No |
| 13712 | Fkbp3   | 0.0000 | No |
| 13713 | Fkbp4   | 0.0000 | No |
| 13714 | Fkbp5   | 0.0000 | No |
| 13715 | Fkbp6   | 0.0000 | No |
| 13716 | Fkbp7   | 0.0000 | No |
| 13717 | Fkbp8   | 0.0000 | No |
| 13718 | Fkbp9   | 0.0000 | No |
| 13719 | Fkbp1   | 0.0000 | No |
| 13720 | Fkrp    | 0.0000 | No |
| 13721 | Fktn    | 0.0000 | No |
| 13722 | Flad1   | 0.0000 | No |
| 13723 | Flcn    | 0.0000 | No |
| 13724 | Flg     | 0.0000 | No |
| 13725 | Flg2    | 0.0000 | No |
| 13726 | Fli1    | 0.0000 | No |
| 13727 | Flii    | 0.0000 | No |
| 13728 | Flna    | 0.0000 | No |
| 13729 | Flnb    | 0.0000 | No |
| 13730 | Flnc    | 0.0000 | No |
| 13731 | Flot1   | 0.0000 | No |
| 13732 | Flot2   | 0.0000 | No |
| 13733 | Flrt1   | 0.0000 | No |
| 13734 | Flrt2   | 0.0000 | No |
| 13735 | Flrt3   | 0.0000 | No |
| 13736 | Flt1    | 0.0000 | No |
| 13737 | Flt3    | 0.0000 | No |
| 13738 | Flt3l   | 0.0000 | No |
| 13739 | Flt4    | 0.0000 | No |
| 13740 | Flywch1 | 0.0000 | No |
| 13741 | Flywch2 | 0.0000 | No |
| 13742 | Fmc1    | 0.0000 | No |
| 13743 | Fmn1    | 0.0000 | No |
| 13744 | Fmn2    | 0.0000 | No |
| 13745 | Fmnl1   | 0.0000 | No |
| 13746 | Fmnl2   | 0.0000 | No |
| 13747 | Fmnl3   | 0.0000 | No |
| 13748 | Fmo1    | 0.0000 | No |
| 13749 | Fmo2    | 0.0000 | No |
| 13750 | Fmo3    | 0.0000 | No |
| 13751 | Fmo4    | 0.0000 | No |

|       |            |        |    |
|-------|------------|--------|----|
| 13752 | Fmo5       | 0.0000 | No |
| 13753 | Fmo6       | 0.0000 | No |
| 13754 | Fmo9       | 0.0000 | No |
| 13755 | Fmod       | 0.0000 | No |
| 13756 | Fmr1       | 0.0000 | No |
| 13757 | Fmr1nb     | 0.0000 | No |
| 13758 | Fn1        | 0.0000 | No |
| 13759 | Fn3k       | 0.0000 | No |
| 13760 | Fn3krp     | 0.0000 | No |
| 13761 | Fnbp1      | 0.0000 | No |
| 13762 | Fnbp11     | 0.0000 | No |
| 13763 | Fnbp4      | 0.0000 | No |
| 13764 | Fnd3c2     | 0.0000 | No |
| 13765 | Fndc1      | 0.0000 | No |
| 13766 | Fndc10     | 0.0000 | No |
| 13767 | Fndc3a     | 0.0000 | No |
| 13768 | Fndc3b     | 0.0000 | No |
| 13769 | Fndc3c1    | 0.0000 | No |
| 13770 | Fndc4      | 0.0000 | No |
| 13771 | Fndc5      | 0.0000 | No |
| 13772 | Fndc7      | 0.0000 | No |
| 13773 | Fndc8      | 0.0000 | No |
| 13774 | Fndc9      | 0.0000 | No |
| 13775 | Fnip1      | 0.0000 | No |
| 13776 | Fnip2      | 0.0000 | No |
| 13777 | Fnta       | 0.0000 | No |
| 13778 | FO082316.1 | 0.0000 | No |
| 13779 | FO082328.1 | 0.0000 | No |
| 13780 | Focad      | 0.0000 | No |
| 13781 | Folh1      | 0.0000 | No |
| 13782 | Folr2      | 0.0000 | No |
| 13783 | Fopnl      | 0.0000 | No |
| 13784 | Fos        | 0.0000 | No |
| 13785 | Fosb       | 0.0000 | No |
| 13786 | Fosl1      | 0.0000 | No |
| 13787 | Foxa2      | 0.0000 | No |
| 13788 | Foxa3      | 0.0000 | No |
| 13789 | Foxb1      | 0.0000 | No |
| 13790 | Foxb2      | 0.0000 | No |
| 13791 | Foxc1      | 0.0000 | No |
| 13792 | Foxd1      | 0.0000 | No |
| 13793 | Foxd2      | 0.0000 | No |
| 13794 | Foxd2os    | 0.0000 | No |
| 13795 | Foxd3      | 0.0000 | No |
| 13796 | Foxd4      | 0.0000 | No |
| 13797 | Foxe1      | 0.0000 | No |

|       |          |        |    |
|-------|----------|--------|----|
| 13798 | Foxe3    | 0.0000 | No |
| 13799 | Foxf1    | 0.0000 | No |
| 13800 | Foxf2    | 0.0000 | No |
| 13801 | Foxg1    | 0.0000 | No |
| 13802 | Foxh1    | 0.0000 | No |
| 13803 | Foxi1    | 0.0000 | No |
| 13804 | Foxi2    | 0.0000 | No |
| 13805 | Foxi3    | 0.0000 | No |
| 13806 | Foxj1    | 0.0000 | No |
| 13807 | Foxj2    | 0.0000 | No |
| 13808 | Foxj3    | 0.0000 | No |
| 13809 | Foxk1    | 0.0000 | No |
| 13810 | Foxk2    | 0.0000 | No |
| 13811 | Foxl1    | 0.0000 | No |
| 13812 | Foxl2    | 0.0000 | No |
| 13813 | Foxl2os  | 0.0000 | No |
| 13814 | Foxm1    | 0.0000 | No |
| 13815 | Foxn2    | 0.0000 | No |
| 13816 | Foxn3    | 0.0000 | No |
| 13817 | Foxn4    | 0.0000 | No |
| 13818 | Foxo1    | 0.0000 | No |
| 13819 | Foxo3    | 0.0000 | No |
| 13820 | Foxo4    | 0.0000 | No |
| 13821 | Foxo6    | 0.0000 | No |
| 13822 | Foxo6os  | 0.0000 | No |
| 13823 | Foxp1    | 0.0000 | No |
| 13824 | Foxp2    | 0.0000 | No |
| 13825 | Foxp3    | 0.0000 | No |
| 13826 | Foxp4    | 0.0000 | No |
| 13827 | Foxq1    | 0.0000 | No |
| 13828 | Foxr1    | 0.0000 | No |
| 13829 | Foxred1  | 0.0000 | No |
| 13830 | Foxred2  | 0.0000 | No |
| 13831 | Fpgs     | 0.0000 | No |
| 13832 | Fpgt     | 0.0000 | No |
| 13833 | Fpr3     | 0.0000 | No |
| 13834 | Fpr-rs4  | 0.0000 | No |
| 13835 | Fpr-rs6  | 0.0000 | No |
| 13836 | Fpr-rs7  | 0.0000 | No |
| 13837 | Fra10ac1 | 0.0000 | No |
| 13838 | Fras1    | 0.0000 | No |
| 13839 | Frat1    | 0.0000 | No |
| 13840 | Frat2    | 0.0000 | No |
| 13841 | Frem1    | 0.0000 | No |
| 13842 | Frem2    | 0.0000 | No |
| 13843 | Frem3    | 0.0000 | No |

|       |            |        |    |
|-------|------------|--------|----|
| 13844 | Frg1       | 0.0000 | No |
| 13845 | Frk        | 0.0000 | No |
| 13846 | Frmd3      | 0.0000 | No |
| 13847 | Frmd4a     | 0.0000 | No |
| 13848 | Frmd4b     | 0.0000 | No |
| 13849 | Frmd5      | 0.0000 | No |
| 13850 | Frmd6      | 0.0000 | No |
| 13851 | Frmd7      | 0.0000 | No |
| 13852 | Frmd8os    | 0.0000 | No |
| 13853 | Frmpd1     | 0.0000 | No |
| 13854 | Frmpd1os   | 0.0000 | No |
| 13855 | Frmpd2     | 0.0000 | No |
| 13856 | Frmpd3     | 0.0000 | No |
| 13857 | Frmpd4     | 0.0000 | No |
| 13858 | Frrs1      | 0.0000 | No |
| 13859 | Frrs11     | 0.0000 | No |
| 13860 | Frs2       | 0.0000 | No |
| 13861 | Frs3       | 0.0000 | No |
| 13862 | Fry        | 0.0000 | No |
| 13863 | Fryl       | 0.0000 | No |
| 13864 | Fsbp       | 0.0000 | No |
| 13865 | Fscb       | 0.0000 | No |
| 13866 | Fscn1      | 0.0000 | No |
| 13867 | Fscn2      | 0.0000 | No |
| 13868 | Fscn3      | 0.0000 | No |
| 13869 | Fsd1       | 0.0000 | No |
| 13870 | Fsd11      | 0.0000 | No |
| 13871 | Fsd2       | 0.0000 | No |
| 13872 | Fshb       | 0.0000 | No |
| 13873 | Fsip1      | 0.0000 | No |
| 13874 | Fsip2      | 0.0000 | No |
| 13875 | Fst        | 0.0000 | No |
| 13876 | Fstl1      | 0.0000 | No |
| 13877 | Fstl3      | 0.0000 | No |
| 13878 | Fstl4      | 0.0000 | No |
| 13879 | Fstl5      | 0.0000 | No |
| 13880 | Ftcd       | 0.0000 | No |
| 13881 | Fth1       | 0.0000 | No |
| 13882 | Fth117a    | 0.0000 | No |
| 13883 | Fth117b    | 0.0000 | No |
| 13884 | Fth117c    | 0.0000 | No |
| 13885 | Fth117d    | 0.0000 | No |
| 13886 | Fth117e    | 0.0000 | No |
| 13887 | Fth117f    | 0.0000 | No |
| 13888 | Fth117-ps1 | 0.0000 | No |
| 13889 | Fth117-ps2 | 0.0000 | No |

|       |            |        |    |
|-------|------------|--------|----|
| 13890 | Fthl17-ps3 | 0.0000 | No |
| 13891 | Fth-ps2    | 0.0000 | No |
| 13892 | Ftl1       | 0.0000 | No |
| 13893 | Ftl2-ps    | 0.0000 | No |
| 13894 | Ftmt       | 0.0000 | No |
| 13895 | Fto        | 0.0000 | No |
| 13896 | Ftsj1      | 0.0000 | No |
| 13897 | Ftsj3      | 0.0000 | No |
| 13898 | Fubp1      | 0.0000 | No |
| 13899 | Fubp3      | 0.0000 | No |
| 13900 | Fuca1      | 0.0000 | No |
| 13901 | Fuk        | 0.0000 | No |
| 13902 | Fundc1     | 0.0000 | No |
| 13903 | Fundc2     | 0.0000 | No |
| 13904 | Fuom       | 0.0000 | No |
| 13905 | Furin      | 0.0000 | No |
| 13906 | Fus        | 0.0000 | No |
| 13907 | Fut1       | 0.0000 | No |
| 13908 | Fut10      | 0.0000 | No |
| 13909 | Fut11      | 0.0000 | No |
| 13910 | Fut2       | 0.0000 | No |
| 13911 | Fut4       | 0.0000 | No |
| 13912 | Fut7       | 0.0000 | No |
| 13913 | Fut8       | 0.0000 | No |
| 13914 | Fut9       | 0.0000 | No |
| 13915 | Fuz        | 0.0000 | No |
| 13916 | Fv1        | 0.0000 | No |
| 13917 | Fxn        | 0.0000 | No |
| 13918 | Fxr1       | 0.0000 | No |
| 13919 | Fxyd1      | 0.0000 | No |
| 13920 | Fxyd3      | 0.0000 | No |
| 13921 | Fxyd4      | 0.0000 | No |
| 13922 | Fxyd5      | 0.0000 | No |
| 13923 | Fyco1      | 0.0000 | No |
| 13924 | Fyn        | 0.0000 | No |
| 13925 | Fytd1      | 0.0000 | No |
| 13926 | Fzd1       | 0.0000 | No |
| 13927 | Fzd10      | 0.0000 | No |
| 13928 | Fzd2       | 0.0000 | No |
| 13929 | Fzd3       | 0.0000 | No |
| 13930 | Fzd5       | 0.0000 | No |
| 13931 | Fzd6       | 0.0000 | No |
| 13932 | Fzd7       | 0.0000 | No |
| 13933 | Fzd8       | 0.0000 | No |
| 13934 | Fzr1       | 0.0000 | No |
| 13935 | G2e3       | 0.0000 | No |

|       |               |        |    |
|-------|---------------|--------|----|
| 13936 | G3bp1         | 0.0000 | No |
| 13937 | G3bp2         | 0.0000 | No |
| 13938 | G430049J08Rik | 0.0000 | No |
| 13939 | G430095P16Rik | 0.0000 | No |
| 13940 | G530011O06Rik | 0.0000 | No |
| 13941 | G530012D18Rik | 0.0000 | No |
| 13942 | G630016G05Rik | 0.0000 | No |
| 13943 | G630018N14Rik | 0.0000 | No |
| 13944 | G630022F23Rik | 0.0000 | No |
| 13945 | G630030J09Rik | 0.0000 | No |
| 13946 | G630064G18Rik | 0.0000 | No |
| 13947 | G6b           | 0.0000 | No |
| 13948 | G6pc          | 0.0000 | No |
| 13949 | G6pc2         | 0.0000 | No |
| 13950 | G6pc3         | 0.0000 | No |
| 13951 | G6pdx         | 0.0000 | No |
| 13952 | G730003C15Rik | 0.0000 | No |
| 13953 | G730013B05Rik | 0.0000 | No |
| 13954 | Gaa           | 0.0000 | No |
| 13955 | Gab1          | 0.0000 | No |
| 13956 | Gabarap       | 0.0000 | No |
| 13957 | Gabarapl1     | 0.0000 | No |
| 13958 | Gabarapl2     | 0.0000 | No |
| 13959 | Gabbr1        | 0.0000 | No |
| 13960 | Gabbr2        | 0.0000 | No |
| 13961 | Gabpa         | 0.0000 | No |
| 13962 | Gabpb1        | 0.0000 | No |
| 13963 | Gabpb2        | 0.0000 | No |
| 13964 | Gabra1        | 0.0000 | No |
| 13965 | Gabra2        | 0.0000 | No |
| 13966 | Gabra3        | 0.0000 | No |
| 13967 | Gabra4        | 0.0000 | No |
| 13968 | Gabra5        | 0.0000 | No |
| 13969 | Gabra6        | 0.0000 | No |
| 13970 | Gabrb1        | 0.0000 | No |
| 13971 | Gabrb2        | 0.0000 | No |
| 13972 | Gabrb3        | 0.0000 | No |
| 13973 | Gabrd         | 0.0000 | No |
| 13974 | Gabre         | 0.0000 | No |
| 13975 | Gabrg1        | 0.0000 | No |
| 13976 | Gabrg2        | 0.0000 | No |
| 13977 | Gabrg3        | 0.0000 | No |
| 13978 | Gabrq         | 0.0000 | No |
| 13979 | Gabrr2        | 0.0000 | No |
| 13980 | Gabrr3        | 0.0000 | No |
| 13981 | Gad1os        | 0.0000 | No |



|       |            |        |    |
|-------|------------|--------|----|
| 13982 | Gad1-ps    | 0.0000 | No |
| 13983 | Gad2       | 0.0000 | No |
| 13984 | Gadd45a    | 0.0000 | No |
| 13985 | Gadd45b    | 0.0000 | No |
| 13986 | Gadd45g    | 0.0000 | No |
| 13987 | Gadd45gip1 | 0.0000 | No |
| 13988 | Gad11      | 0.0000 | No |
| 13989 | Gak        | 0.0000 | No |
| 13990 | Gal        | 0.0000 | No |
| 13991 | Gal3st1    | 0.0000 | No |
| 13992 | Gal3st2    | 0.0000 | No |
| 13993 | Gale       | 0.0000 | No |
| 13994 | Galk1      | 0.0000 | No |
| 13995 | Galk2      | 0.0000 | No |
| 13996 | Galns      | 0.0000 | No |
| 13997 | Galnt10    | 0.0000 | No |
| 13998 | Galnt11    | 0.0000 | No |
| 13999 | Galnt13    | 0.0000 | No |
| 14000 | Galnt14    | 0.0000 | No |
| 14001 | Galnt15    | 0.0000 | No |
| 14002 | Galnt16    | 0.0000 | No |
| 14003 | Galnt18    | 0.0000 | No |
| 14004 | Galnt2     | 0.0000 | No |
| 14005 | Galnt3     | 0.0000 | No |
| 14006 | Galnt4     | 0.0000 | No |
| 14007 | Galnt5     | 0.0000 | No |
| 14008 | Galnt6     | 0.0000 | No |
| 14009 | Galnt6os   | 0.0000 | No |
| 14010 | Galnt7     | 0.0000 | No |
| 14011 | Galnt9     | 0.0000 | No |
| 14012 | Galnt15    | 0.0000 | No |
| 14013 | Galnt16    | 0.0000 | No |
| 14014 | Galp       | 0.0000 | No |
| 14015 | Galr1      | 0.0000 | No |
| 14016 | Galr2      | 0.0000 | No |
| 14017 | Galt       | 0.0000 | No |
| 14018 | Gamt       | 0.0000 | No |
| 14019 | Gan        | 0.0000 | No |
| 14020 | Ganab      | 0.0000 | No |
| 14021 | Ganc       | 0.0000 | No |
| 14022 | Gap43      | 0.0000 | No |
| 14023 | Gapdh      | 0.0000 | No |
| 14024 | Gapdh-ps14 | 0.0000 | No |
| 14025 | Gapdh-ps15 | 0.0000 | No |
| 14026 | Gapdhs     | 0.0000 | No |
| 14027 | Gapt       | 0.0000 | No |

|       |         |        |    |
|-------|---------|--------|----|
| 14028 | Gapvd1  | 0.0000 | No |
| 14029 | Gar1    | 0.0000 | No |
| 14030 | Garem1  | 0.0000 | No |
| 14031 | Garem2  | 0.0000 | No |
| 14032 | Garnl3  | 0.0000 | No |
| 14033 | Gars    | 0.0000 | No |
| 14034 | Gart    | 0.0000 | No |
| 14035 | Gas1    | 0.0000 | No |
| 14036 | Gas2    | 0.0000 | No |
| 14037 | Gas2l1  | 0.0000 | No |
| 14038 | Gas2l2  | 0.0000 | No |
| 14039 | Gas2l3  | 0.0000 | No |
| 14040 | Gas5    | 0.0000 | No |
| 14041 | Gas6    | 0.0000 | No |
| 14042 | Gas7    | 0.0000 | No |
| 14043 | Gas8    | 0.0000 | No |
| 14044 | Gast    | 0.0000 | No |
| 14045 | Gata1   | 0.0000 | No |
| 14046 | Gata2   | 0.0000 | No |
| 14047 | Gata4   | 0.0000 | No |
| 14048 | Gata5   | 0.0000 | No |
| 14049 | Gata5os | 0.0000 | No |
| 14050 | Gata6   | 0.0000 | No |
| 14051 | Gatad1  | 0.0000 | No |
| 14052 | Gatad2a | 0.0000 | No |
| 14053 | Gatad2b | 0.0000 | No |
| 14054 | Gatb    | 0.0000 | No |
| 14055 | Gatc    | 0.0000 | No |
| 14056 | Gatm    | 0.0000 | No |
| 14057 | Gatsl2  | 0.0000 | No |
| 14058 | Gatsl3  | 0.0000 | No |
| 14059 | Gba     | 0.0000 | No |
| 14060 | Gbas    | 0.0000 | No |
| 14061 | Gbe1    | 0.0000 | No |
| 14062 | Gbf1    | 0.0000 | No |
| 14063 | Gbgt1   | 0.0000 | No |
| 14064 | Gbp10   | 0.0000 | No |
| 14065 | Gbp11   | 0.0000 | No |
| 14066 | Gbp2    | 0.0000 | No |
| 14067 | Gbp2b   | 0.0000 | No |
| 14068 | Gbp2-ps | 0.0000 | No |
| 14069 | Gbp3    | 0.0000 | No |
| 14070 | Gbp4    | 0.0000 | No |
| 14071 | Gbp5    | 0.0000 | No |
| 14072 | Gbp6    | 0.0000 | No |
| 14073 | Gbp7    | 0.0000 | No |

|       |         |        |    |
|-------|---------|--------|----|
| 14074 | Gbp9    | 0.0000 | No |
| 14075 | Gbx1    | 0.0000 | No |
| 14076 | Gbx2    | 0.0000 | No |
| 14077 | Gc      | 0.0000 | No |
| 14078 | Gca     | 0.0000 | No |
| 14079 | Gcat    | 0.0000 | No |
| 14080 | Gcc1    | 0.0000 | No |
| 14081 | Gcc2    | 0.0000 | No |
| 14082 | Gcdh    | 0.0000 | No |
| 14083 | Gcfc2   | 0.0000 | No |
| 14084 | Gch1    | 0.0000 | No |
| 14085 | Gchfr   | 0.0000 | No |
| 14086 | Gckr    | 0.0000 | No |
| 14087 | Gclc    | 0.0000 | No |
| 14088 | Gclm    | 0.0000 | No |
| 14089 | Gcm1    | 0.0000 | No |
| 14090 | Gcm2    | 0.0000 | No |
| 14091 | Gcn111  | 0.0000 | No |
| 14092 | Gcnt2   | 0.0000 | No |
| 14093 | Gcnt3   | 0.0000 | No |
| 14094 | Gcnt7   | 0.0000 | No |
| 14095 | Gcom1   | 0.0000 | No |
| 14096 | Gcsh    | 0.0000 | No |
| 14097 | Gda     | 0.0000 | No |
| 14098 | Gdap1   | 0.0000 | No |
| 14099 | Gdap10  | 0.0000 | No |
| 14100 | Gdap111 | 0.0000 | No |
| 14101 | Gdap2   | 0.0000 | No |
| 14102 | Gde1    | 0.0000 | No |
| 14103 | Gdf1    | 0.0000 | No |
| 14104 | Gdf10   | 0.0000 | No |
| 14105 | Gdf11   | 0.0000 | No |
| 14106 | Gdf3    | 0.0000 | No |
| 14107 | Gdf5    | 0.0000 | No |
| 14108 | Gdf6    | 0.0000 | No |
| 14109 | Gdf7    | 0.0000 | No |
| 14110 | Gdf9    | 0.0000 | No |
| 14111 | Gdi1    | 0.0000 | No |
| 14112 | Gdi2    | 0.0000 | No |
| 14113 | Gdnf    | 0.0000 | No |
| 14114 | Gdpd1   | 0.0000 | No |
| 14115 | Gdpd2   | 0.0000 | No |
| 14116 | Gdpd3   | 0.0000 | No |
| 14117 | Gdpd4   | 0.0000 | No |
| 14118 | Gdpd5   | 0.0000 | No |
| 14119 | Gdpgp1  | 0.0000 | No |

|       |        |        |    |
|-------|--------|--------|----|
| 14120 | Gemin2 | 0.0000 | No |
| 14121 | Gemin4 | 0.0000 | No |
| 14122 | Gemin5 | 0.0000 | No |
| 14123 | Gemin6 | 0.0000 | No |
| 14124 | Gemin7 | 0.0000 | No |
| 14125 | Gemin8 | 0.0000 | No |
| 14126 | Gen1   | 0.0000 | No |
| 14127 | Get4   | 0.0000 | No |
| 14128 | Gfap   | 0.0000 | No |
| 14129 | Gfer   | 0.0000 | No |
| 14130 | Gfi1   | 0.0000 | No |
| 14131 | Gfi1b  | 0.0000 | No |
| 14132 | Gfm1   | 0.0000 | No |
| 14133 | Gfm2   | 0.0000 | No |
| 14134 | Gfod1  | 0.0000 | No |
| 14135 | Gfod2  | 0.0000 | No |
| 14136 | Gfpt1  | 0.0000 | No |
| 14137 | Gfpt2  | 0.0000 | No |
| 14138 | Gfra1  | 0.0000 | No |
| 14139 | Gfra2  | 0.0000 | No |
| 14140 | Gfra4  | 0.0000 | No |
| 14141 | Gfy    | 0.0000 | No |
| 14142 | Gga1   | 0.0000 | No |
| 14143 | Gga2   | 0.0000 | No |
| 14144 | Gga3   | 0.0000 | No |
| 14145 | Ggact  | 0.0000 | No |
| 14146 | Ggct   | 0.0000 | No |
| 14147 | Ggcx   | 0.0000 | No |
| 14148 | Ggn    | 0.0000 | No |
| 14149 | Ggnbp1 | 0.0000 | No |
| 14150 | Ggnbp2 | 0.0000 | No |
| 14151 | Ggps1  | 0.0000 | No |
| 14152 | Ggt1   | 0.0000 | No |
| 14153 | Ggt5   | 0.0000 | No |
| 14154 | Ggt7   | 0.0000 | No |
| 14155 | Ggta1  | 0.0000 | No |
| 14156 | Gh     | 0.0000 | No |
| 14157 | Ghdc   | 0.0000 | No |
| 14158 | Ghitm  | 0.0000 | No |
| 14159 | Ghr    | 0.0000 | No |
| 14160 | Ghrhr  | 0.0000 | No |
| 14161 | Ghrl   | 0.0000 | No |
| 14162 | Ghsr   | 0.0000 | No |
| 14163 | Gid4   | 0.0000 | No |
| 14164 | Gid8   | 0.0000 | No |
| 14165 | Gif    | 0.0000 | No |

|       |          |        |    |
|-------|----------|--------|----|
| 14166 | Gigyf1   | 0.0000 | No |
| 14167 | Gigyf2   | 0.0000 | No |
| 14168 | Gimap1   | 0.0000 | No |
| 14169 | Gimap1os | 0.0000 | No |
| 14170 | Gimap3   | 0.0000 | No |
| 14171 | Gimap4   | 0.0000 | No |
| 14172 | Gimap5   | 0.0000 | No |
| 14173 | Gimap6   | 0.0000 | No |
| 14174 | Gimap7   | 0.0000 | No |
| 14175 | Gimap8   | 0.0000 | No |
| 14176 | Gimap9   | 0.0000 | No |
| 14177 | Gimd1    | 0.0000 | No |
| 14178 | Gin1     | 0.0000 | No |
| 14179 | Gins1    | 0.0000 | No |
| 14180 | Gins2    | 0.0000 | No |
| 14181 | Gins3    | 0.0000 | No |
| 14182 | Gins4    | 0.0000 | No |
| 14183 | Gipc1    | 0.0000 | No |
| 14184 | Gipr     | 0.0000 | No |
| 14185 | Git1     | 0.0000 | No |
| 14186 | Git2     | 0.0000 | No |
| 14187 | Gja1     | 0.0000 | No |
| 14188 | Gja5     | 0.0000 | No |
| 14189 | Gja6     | 0.0000 | No |
| 14190 | Gja8     | 0.0000 | No |
| 14191 | Gjb1     | 0.0000 | No |
| 14192 | Gjb4     | 0.0000 | No |
| 14193 | Gjb5     | 0.0000 | No |
| 14194 | Gjb6     | 0.0000 | No |
| 14195 | Gjc1     | 0.0000 | No |
| 14196 | Gjc2     | 0.0000 | No |
| 14197 | Gjc3     | 0.0000 | No |
| 14198 | Gjd2     | 0.0000 | No |
| 14199 | Gjd3     | 0.0000 | No |
| 14200 | Gjd4     | 0.0000 | No |
| 14201 | Gje1     | 0.0000 | No |
| 14202 | Gk       | 0.0000 | No |
| 14203 | Gk2      | 0.0000 | No |
| 14204 | Gk5      | 0.0000 | No |
| 14205 | Gkap1    | 0.0000 | No |
| 14206 | Gkn2     | 0.0000 | No |
| 14207 | Gkn3     | 0.0000 | No |
| 14208 | Gla      | 0.0000 | No |
| 14209 | Glb1     | 0.0000 | No |
| 14210 | Glb11    | 0.0000 | No |
| 14211 | Glb112   | 0.0000 | No |

|       |          |        |    |
|-------|----------|--------|----|
| 14212 | Glb113   | 0.0000 | No |
| 14213 | Glcci1   | 0.0000 | No |
| 14214 | Glce     | 0.0000 | No |
| 14215 | Glde     | 0.0000 | No |
| 14216 | Gldn     | 0.0000 | No |
| 14217 | Gle1     | 0.0000 | No |
| 14218 | Gli1     | 0.0000 | No |
| 14219 | Gli2     | 0.0000 | No |
| 14220 | Gli3     | 0.0000 | No |
| 14221 | Glpr1    | 0.0000 | No |
| 14222 | Glpr111  | 0.0000 | No |
| 14223 | Glpr112  | 0.0000 | No |
| 14224 | Glpr2    | 0.0000 | No |
| 14225 | Glis1    | 0.0000 | No |
| 14226 | Glis2    | 0.0000 | No |
| 14227 | Glis3    | 0.0000 | No |
| 14228 | Glmn     | 0.0000 | No |
| 14229 | Gmp      | 0.0000 | No |
| 14230 | Glns-ps1 | 0.0000 | No |
| 14231 | Glo1     | 0.0000 | No |
| 14232 | Glod4    | 0.0000 | No |
| 14233 | Glp1r    | 0.0000 | No |
| 14234 | Gla2     | 0.0000 | No |
| 14235 | Gla3     | 0.0000 | No |
| 14236 | Gla4     | 0.0000 | No |
| 14237 | Glb      | 0.0000 | No |
| 14238 | Glpr1    | 0.0000 | No |
| 14239 | Glrx     | 0.0000 | No |
| 14240 | Glrx2    | 0.0000 | No |
| 14241 | Glrx3    | 0.0000 | No |
| 14242 | Glrx5    | 0.0000 | No |
| 14243 | Gls      | 0.0000 | No |
| 14244 | Gls2     | 0.0000 | No |
| 14245 | Glt1d1   | 0.0000 | No |
| 14246 | Glt6d1   | 0.0000 | No |
| 14247 | Glt8d1   | 0.0000 | No |
| 14248 | Glt8d2   | 0.0000 | No |
| 14249 | Gltpr    | 0.0000 | No |
| 14250 | Gltpr2   | 0.0000 | No |
| 14251 | Gltscr1  | 0.0000 | No |
| 14252 | Gltscr11 | 0.0000 | No |
| 14253 | Gltscr2  | 0.0000 | No |
| 14254 | Glud1    | 0.0000 | No |
| 14255 | Glud-ps  | 0.0000 | No |
| 14256 | Glul     | 0.0000 | No |
| 14257 | Glyat    | 0.0000 | No |

|       |         |        |    |
|-------|---------|--------|----|
| 14258 | Glyat13 | 0.0000 | No |
| 14259 | Glyctk  | 0.0000 | No |
| 14260 | Glyr1   | 0.0000 | No |
| 14261 | Gm1000  | 0.0000 | No |
| 14262 | Gm10010 | 0.0000 | No |
| 14263 | Gm10012 | 0.0000 | No |
| 14264 | Gm10013 | 0.0000 | No |
| 14265 | Gm10015 | 0.0000 | No |
| 14266 | Gm10020 | 0.0000 | No |
| 14267 | Gm10025 | 0.0000 | No |
| 14268 | Gm10029 | 0.0000 | No |
| 14269 | Gm10030 | 0.0000 | No |
| 14270 | Gm10031 | 0.0000 | No |
| 14271 | Gm10032 | 0.0000 | No |
| 14272 | Gm10036 | 0.0000 | No |
| 14273 | Gm10038 | 0.0000 | No |
| 14274 | Gm10039 | 0.0000 | No |
| 14275 | Gm10040 | 0.0000 | No |
| 14276 | Gm10042 | 0.0000 | No |
| 14277 | Gm10043 | 0.0000 | No |
| 14278 | Gm10044 | 0.0000 | No |
| 14279 | Gm10045 | 0.0000 | No |
| 14280 | Gm10046 | 0.0000 | No |
| 14281 | Gm10048 | 0.0000 | No |
| 14282 | Gm10051 | 0.0000 | No |
| 14283 | Gm10052 | 0.0000 | No |
| 14284 | Gm10053 | 0.0000 | No |
| 14285 | Gm10057 | 0.0000 | No |
| 14286 | Gm10058 | 0.0000 | No |
| 14287 | Gm10059 | 0.0000 | No |
| 14288 | Gm10062 | 0.0000 | No |
| 14289 | Gm10064 | 0.0000 | No |
| 14290 | Gm10065 | 0.0000 | No |
| 14291 | Gm10067 | 0.0000 | No |
| 14292 | Gm10069 | 0.0000 | No |
| 14293 | Gm10073 | 0.0000 | No |
| 14294 | Gm10074 | 0.0000 | No |
| 14295 | Gm10075 | 0.0000 | No |
| 14296 | Gm10076 | 0.0000 | No |
| 14297 | Gm10080 | 0.0000 | No |
| 14298 | Gm10081 | 0.0000 | No |
| 14299 | Gm10086 | 0.0000 | No |
| 14300 | Gm10087 | 0.0000 | No |
| 14301 | Gm10088 | 0.0000 | No |
| 14302 | Gm10093 | 0.0000 | No |
| 14303 | Gm10096 | 0.0000 | No |

|       |         |        |    |
|-------|---------|--------|----|
| 14304 | Gm10097 | 0.0000 | No |
| 14305 | Gm10100 | 0.0000 | No |
| 14306 | Gm10101 | 0.0000 | No |
| 14307 | Gm10105 | 0.0000 | No |
| 14308 | Gm10108 | 0.0000 | No |
| 14309 | Gm10109 | 0.0000 | No |
| 14310 | Gm10110 | 0.0000 | No |
| 14311 | Gm10112 | 0.0000 | No |
| 14312 | Gm10113 | 0.0000 | No |
| 14313 | Gm10115 | 0.0000 | No |
| 14314 | Gm10118 | 0.0000 | No |
| 14315 | Gm10123 | 0.0000 | No |
| 14316 | Gm10125 | 0.0000 | No |
| 14317 | Gm10126 | 0.0000 | No |
| 14318 | Gm10128 | 0.0000 | No |
| 14319 | Gm10129 | 0.0000 | No |
| 14320 | Gm10130 | 0.0000 | No |
| 14321 | Gm10131 | 0.0000 | No |
| 14322 | Gm10132 | 0.0000 | No |
| 14323 | Gm10134 | 0.0000 | No |
| 14324 | Gm10136 | 0.0000 | No |
| 14325 | Gm10138 | 0.0000 | No |
| 14326 | Gm10139 | 0.0000 | No |
| 14327 | Gm10142 | 0.0000 | No |
| 14328 | Gm10143 | 0.0000 | No |
| 14329 | Gm10145 | 0.0000 | No |
| 14330 | Gm10146 | 0.0000 | No |
| 14331 | Gm10147 | 0.0000 | No |
| 14332 | Gm10152 | 0.0000 | No |
| 14333 | Gm10153 | 0.0000 | No |
| 14334 | Gm10154 | 0.0000 | No |
| 14335 | Gm10155 | 0.0000 | No |
| 14336 | Gm10156 | 0.0000 | No |
| 14337 | Gm10157 | 0.0000 | No |
| 14338 | Gm10160 | 0.0000 | No |
| 14339 | Gm10161 | 0.0000 | No |
| 14340 | Gm10163 | 0.0000 | No |
| 14341 | Gm10167 | 0.0000 | No |
| 14342 | Gm10169 | 0.0000 | No |
| 14343 | Gm10171 | 0.0000 | No |
| 14344 | Gm10172 | 0.0000 | No |
| 14345 | Gm10175 | 0.0000 | No |
| 14346 | Gm10176 | 0.0000 | No |
| 14347 | Gm10177 | 0.0000 | No |
| 14348 | Gm10179 | 0.0000 | No |
| 14349 | Gm10180 | 0.0000 | No |



|       |         |        |    |
|-------|---------|--------|----|
| 14350 | Gm10181 | 0.0000 | No |
| 14351 | Gm10182 | 0.0000 | No |
| 14352 | Gm10184 | 0.0000 | No |
| 14353 | Gm10188 | 0.0000 | No |
| 14354 | Gm10190 | 0.0000 | No |
| 14355 | Gm10192 | 0.0000 | No |
| 14356 | Gm10193 | 0.0000 | No |
| 14357 | Gm10197 | 0.0000 | No |
| 14358 | Gm10198 | 0.0000 | No |
| 14359 | Gm10203 | 0.0000 | No |
| 14360 | Gm10205 | 0.0000 | No |
| 14361 | Gm10209 | 0.0000 | No |
| 14362 | Gm10212 | 0.0000 | No |
| 14363 | Gm10221 | 0.0000 | No |
| 14364 | Gm10222 | 0.0000 | No |
| 14365 | Gm10224 | 0.0000 | No |
| 14366 | Gm10226 | 0.0000 | No |
| 14367 | Gm10228 | 0.0000 | No |
| 14368 | Gm10229 | 0.0000 | No |
| 14369 | Gm10230 | 0.0000 | No |
| 14370 | Gm10231 | 0.0000 | No |
| 14371 | Gm10232 | 0.0000 | No |
| 14372 | Gm10233 | 0.0000 | No |
| 14373 | Gm10234 | 0.0000 | No |
| 14374 | Gm10237 | 0.0000 | No |
| 14375 | Gm10240 | 0.0000 | No |
| 14376 | Gm10241 | 0.0000 | No |
| 14377 | Gm10242 | 0.0000 | No |
| 14378 | Gm10243 | 0.0000 | No |
| 14379 | Gm10244 | 0.0000 | No |
| 14380 | Gm10247 | 0.0000 | No |
| 14381 | Gm10248 | 0.0000 | No |
| 14382 | Gm10250 | 0.0000 | No |
| 14383 | Gm10251 | 0.0000 | No |
| 14384 | Gm10252 | 0.0000 | No |
| 14385 | Gm10254 | 0.0000 | No |
| 14386 | Gm10256 | 0.0000 | No |
| 14387 | Gm10257 | 0.0000 | No |
| 14388 | Gm10259 | 0.0000 | No |
| 14389 | Gm10260 | 0.0000 | No |
| 14390 | Gm10263 | 0.0000 | No |
| 14391 | Gm10264 | 0.0000 | No |
| 14392 | Gm10267 | 0.0000 | No |
| 14393 | Gm10268 | 0.0000 | No |
| 14394 | Gm10269 | 0.0000 | No |
| 14395 | Gm10272 | 0.0000 | No |

|       |         |        |    |
|-------|---------|--------|----|
| 14396 | Gm10273 | 0.0000 | No |
| 14397 | Gm10275 | 0.0000 | No |
| 14398 | Gm10277 | 0.0000 | No |
| 14399 | Gm10282 | 0.0000 | No |
| 14400 | Gm10283 | 0.0000 | No |
| 14401 | Gm10284 | 0.0000 | No |
| 14402 | Gm10286 | 0.0000 | No |
| 14403 | Gm10287 | 0.0000 | No |
| 14404 | Gm10288 | 0.0000 | No |
| 14405 | Gm10290 | 0.0000 | No |
| 14406 | Gm10291 | 0.0000 | No |
| 14407 | Gm10292 | 0.0000 | No |
| 14408 | Gm10293 | 0.0000 | No |
| 14409 | Gm10298 | 0.0000 | No |
| 14410 | Gm10300 | 0.0000 | No |
| 14411 | Gm10302 | 0.0000 | No |
| 14412 | Gm10305 | 0.0000 | No |
| 14413 | Gm10306 | 0.0000 | No |
| 14414 | Gm10307 | 0.0000 | No |
| 14415 | Gm10308 | 0.0000 | No |
| 14416 | Gm10309 | 0.0000 | No |
| 14417 | Gm10310 | 0.0000 | No |
| 14418 | Gm10312 | 0.0000 | No |
| 14419 | Gm10313 | 0.0000 | No |
| 14420 | Gm10318 | 0.0000 | No |
| 14421 | Gm10320 | 0.0000 | No |
| 14422 | Gm10322 | 0.0000 | No |
| 14423 | Gm10323 | 0.0000 | No |
| 14424 | Gm10324 | 0.0000 | No |
| 14425 | Gm10327 | 0.0000 | No |
| 14426 | Gm10330 | 0.0000 | No |
| 14427 | Gm10334 | 0.0000 | No |
| 14428 | Gm10335 | 0.0000 | No |
| 14429 | Gm10337 | 0.0000 | No |
| 14430 | Gm10338 | 0.0000 | No |
| 14431 | Gm10339 | 0.0000 | No |
| 14432 | Gm10340 | 0.0000 | No |
| 14433 | Gm10343 | 0.0000 | No |
| 14434 | Gm10351 | 0.0000 | No |
| 14435 | Gm10352 | 0.0000 | No |
| 14436 | Gm10354 | 0.0000 | No |
| 14437 | Gm10356 | 0.0000 | No |
| 14438 | Gm10357 | 0.0000 | No |
| 14439 | Gm10359 | 0.0000 | No |
| 14440 | Gm10360 | 0.0000 | No |
| 14441 | Gm10364 | 0.0000 | No |

|       |         |        |    |
|-------|---------|--------|----|
| 14442 | Gm10369 | 0.0000 | No |
| 14443 | Gm10371 | 0.0000 | No |
| 14444 | Gm10375 | 0.0000 | No |
| 14445 | Gm10377 | 0.0000 | No |
| 14446 | Gm10378 | 0.0000 | No |
| 14447 | Gm10382 | 0.0000 | No |
| 14448 | Gm10388 | 0.0000 | No |
| 14449 | Gm10390 | 0.0000 | No |
| 14450 | Gm10392 | 0.0000 | No |
| 14451 | Gm10398 | 0.0000 | No |
| 14452 | Gm10399 | 0.0000 | No |
| 14453 | Gm10400 | 0.0000 | No |
| 14454 | Gm10401 | 0.0000 | No |
| 14455 | Gm10406 | 0.0000 | No |
| 14456 | Gm10408 | 0.0000 | No |
| 14457 | Gm10409 | 0.0000 | No |
| 14458 | Gm10410 | 0.0000 | No |
| 14459 | Gm10413 | 0.0000 | No |
| 14460 | Gm10415 | 0.0000 | No |
| 14461 | Gm10416 | 0.0000 | No |
| 14462 | Gm10417 | 0.0000 | No |
| 14463 | Gm10418 | 0.0000 | No |
| 14464 | Gm10419 | 0.0000 | No |
| 14465 | Gm10420 | 0.0000 | No |
| 14466 | Gm10421 | 0.0000 | No |
| 14467 | Gm10424 | 0.0000 | No |
| 14468 | Gm10425 | 0.0000 | No |
| 14469 | Gm10428 | 0.0000 | No |
| 14470 | Gm1043  | 0.0000 | No |
| 14471 | Gm10433 | 0.0000 | No |
| 14472 | Gm10434 | 0.0000 | No |
| 14473 | Gm10435 | 0.0000 | No |
| 14474 | Gm10436 | 0.0000 | No |
| 14475 | Gm10439 | 0.0000 | No |
| 14476 | Gm10443 | 0.0000 | No |
| 14477 | Gm10444 | 0.0000 | No |
| 14478 | Gm10445 | 0.0000 | No |
| 14479 | Gm10447 | 0.0000 | No |
| 14480 | Gm10451 | 0.0000 | No |
| 14481 | Gm10459 | 0.0000 | No |
| 14482 | Gm10461 | 0.0000 | No |
| 14483 | Gm10463 | 0.0000 | No |
| 14484 | Gm10466 | 0.0000 | No |
| 14485 | Gm10472 | 0.0000 | No |
| 14486 | Gm10475 | 0.0000 | No |
| 14487 | Gm10476 | 0.0000 | No |

|       |         |        |    |
|-------|---------|--------|----|
| 14488 | Gm10477 | 0.0000 | No |
| 14489 | Gm10479 | 0.0000 | No |
| 14490 | Gm10481 | 0.0000 | No |
| 14491 | Gm10482 | 0.0000 | No |
| 14492 | Gm10486 | 0.0000 | No |
| 14493 | Gm10487 | 0.0000 | No |
| 14494 | Gm10488 | 0.0000 | No |
| 14495 | Gm10489 | 0.0000 | No |
| 14496 | Gm10490 | 0.0000 | No |
| 14497 | Gm10491 | 0.0000 | No |
| 14498 | Gm10493 | 0.0000 | No |
| 14499 | Gm10499 | 0.0000 | No |
| 14500 | Gm10501 | 0.0000 | No |
| 14501 | Gm10505 | 0.0000 | No |
| 14502 | Gm10509 | 0.0000 | No |
| 14503 | Gm10513 | 0.0000 | No |
| 14504 | Gm10516 | 0.0000 | No |
| 14505 | Gm10517 | 0.0000 | No |
| 14506 | Gm10518 | 0.0000 | No |
| 14507 | Gm10519 | 0.0000 | No |
| 14508 | Gm10521 | 0.0000 | No |
| 14509 | Gm10522 | 0.0000 | No |
| 14510 | Gm10524 | 0.0000 | No |
| 14511 | Gm10530 | 0.0000 | No |
| 14512 | Gm10531 | 0.0000 | No |
| 14513 | Gm10532 | 0.0000 | No |
| 14514 | Gm10537 | 0.0000 | No |
| 14515 | Gm10538 | 0.0000 | No |
| 14516 | Gm10540 | 0.0000 | No |
| 14517 | Gm10542 | 0.0000 | No |
| 14518 | Gm10544 | 0.0000 | No |
| 14519 | Gm10545 | 0.0000 | No |
| 14520 | Gm10548 | 0.0000 | No |
| 14521 | Gm10549 | 0.0000 | No |
| 14522 | Gm10550 | 0.0000 | No |
| 14523 | Gm10552 | 0.0000 | No |
| 14524 | Gm10553 | 0.0000 | No |
| 14525 | Gm10555 | 0.0000 | No |
| 14526 | Gm10556 | 0.0000 | No |
| 14527 | Gm10557 | 0.0000 | No |
| 14528 | Gm10561 | 0.0000 | No |
| 14529 | Gm10563 | 0.0000 | No |
| 14530 | Gm10564 | 0.0000 | No |
| 14531 | Gm10566 | 0.0000 | No |
| 14532 | Gm10570 | 0.0000 | No |
| 14533 | Gm10571 | 0.0000 | No |

|       |         |        |    |
|-------|---------|--------|----|
| 14534 | Gm10575 | 0.0000 | No |
| 14535 | Gm10576 | 0.0000 | No |
| 14536 | Gm10577 | 0.0000 | No |
| 14537 | Gm10578 | 0.0000 | No |
| 14538 | Gm10580 | 0.0000 | No |
| 14539 | Gm10581 | 0.0000 | No |
| 14540 | Gm10582 | 0.0000 | No |
| 14541 | Gm10583 | 0.0000 | No |
| 14542 | Gm10584 | 0.0000 | No |
| 14543 | Gm10591 | 0.0000 | No |
| 14544 | Gm10593 | 0.0000 | No |
| 14545 | Gm10600 | 0.0000 | No |
| 14546 | Gm10601 | 0.0000 | No |
| 14547 | Gm10602 | 0.0000 | No |
| 14548 | Gm10603 | 0.0000 | No |
| 14549 | Gm10604 | 0.0000 | No |
| 14550 | Gm10605 | 0.0000 | No |
| 14551 | Gm10612 | 0.0000 | No |
| 14552 | Gm10614 | 0.0000 | No |
| 14553 | Gm10616 | 0.0000 | No |
| 14554 | Gm10617 | 0.0000 | No |
| 14555 | Gm10619 | 0.0000 | No |
| 14556 | Gm10620 | 0.0000 | No |
| 14557 | Gm10623 | 0.0000 | No |
| 14558 | Gm10629 | 0.0000 | No |
| 14559 | Gm10631 | 0.0000 | No |
| 14560 | Gm10634 | 0.0000 | No |
| 14561 | Gm10636 | 0.0000 | No |
| 14562 | Gm10637 | 0.0000 | No |
| 14563 | Gm10638 | 0.0000 | No |
| 14564 | Gm10639 | 0.0000 | No |
| 14565 | Gm10640 | 0.0000 | No |
| 14566 | Gm10642 | 0.0000 | No |
| 14567 | Gm10643 | 0.0000 | No |
| 14568 | Gm10645 | 0.0000 | No |
| 14569 | Gm10647 | 0.0000 | No |
| 14570 | Gm10650 | 0.0000 | No |
| 14571 | Gm10651 | 0.0000 | No |
| 14572 | Gm10652 | 0.0000 | No |
| 14573 | Gm10653 | 0.0000 | No |
| 14574 | Gm10654 | 0.0000 | No |
| 14575 | Gm10655 | 0.0000 | No |
| 14576 | Gm10657 | 0.0000 | No |
| 14577 | Gm10658 | 0.0000 | No |
| 14578 | Gm10660 | 0.0000 | No |
| 14579 | Gm10662 | 0.0000 | No |

|       |         |        |    |
|-------|---------|--------|----|
| 14580 | Gm10663 | 0.0000 | No |
| 14581 | Gm10665 | 0.0000 | No |
| 14582 | Gm10666 | 0.0000 | No |
| 14583 | Gm10668 | 0.0000 | No |
| 14584 | Gm10670 | 0.0000 | No |
| 14585 | Gm10676 | 0.0000 | No |
| 14586 | Gm10680 | 0.0000 | No |
| 14587 | Gm10681 | 0.0000 | No |
| 14588 | Gm10683 | 0.0000 | No |
| 14589 | Gm10684 | 0.0000 | No |
| 14590 | Gm10685 | 0.0000 | No |
| 14591 | Gm10687 | 0.0000 | No |
| 14592 | Gm10689 | 0.0000 | No |
| 14593 | Gm10693 | 0.0000 | No |
| 14594 | Gm10696 | 0.0000 | No |
| 14595 | Gm10697 | 0.0000 | No |
| 14596 | Gm10698 | 0.0000 | No |
| 14597 | Gm10699 | 0.0000 | No |
| 14598 | Gm1070  | 0.0000 | No |
| 14599 | Gm10701 | 0.0000 | No |
| 14600 | Gm10702 | 0.0000 | No |
| 14601 | Gm10704 | 0.0000 | No |
| 14602 | Gm10705 | 0.0000 | No |
| 14603 | Gm10706 | 0.0000 | No |
| 14604 | Gm10709 | 0.0000 | No |
| 14605 | Gm10710 | 0.0000 | No |
| 14606 | Gm10714 | 0.0000 | No |
| 14607 | Gm10715 | 0.0000 | No |
| 14608 | Gm10717 | 0.0000 | No |
| 14609 | Gm10718 | 0.0000 | No |
| 14610 | Gm10719 | 0.0000 | No |
| 14611 | Gm10720 | 0.0000 | No |
| 14612 | Gm10721 | 0.0000 | No |
| 14613 | Gm10722 | 0.0000 | No |
| 14614 | Gm10723 | 0.0000 | No |
| 14615 | Gm10727 | 0.0000 | No |
| 14616 | Gm10728 | 0.0000 | No |
| 14617 | Gm10729 | 0.0000 | No |
| 14618 | Gm10730 | 0.0000 | No |
| 14619 | Gm10731 | 0.0000 | No |
| 14620 | Gm10735 | 0.0000 | No |
| 14621 | Gm10736 | 0.0000 | No |
| 14622 | Gm10745 | 0.0000 | No |
| 14623 | Gm10748 | 0.0000 | No |
| 14624 | Gm10754 | 0.0000 | No |
| 14625 | Gm10762 | 0.0000 | No |

|       |         |        |    |
|-------|---------|--------|----|
| 14626 | Gm10766 | 0.0000 | No |
| 14627 | Gm10767 | 0.0000 | No |
| 14628 | Gm10770 | 0.0000 | No |
| 14629 | Gm10772 | 0.0000 | No |
| 14630 | Gm10774 | 0.0000 | No |
| 14631 | Gm10775 | 0.0000 | No |
| 14632 | Gm10778 | 0.0000 | No |
| 14633 | Gm10780 | 0.0000 | No |
| 14634 | Gm10782 | 0.0000 | No |
| 14635 | Gm10784 | 0.0000 | No |
| 14636 | Gm10785 | 0.0000 | No |
| 14637 | Gm10787 | 0.0000 | No |
| 14638 | Gm10794 | 0.0000 | No |
| 14639 | Gm10799 | 0.0000 | No |
| 14640 | Gm10800 | 0.0000 | No |
| 14641 | Gm10801 | 0.0000 | No |
| 14642 | Gm10804 | 0.0000 | No |
| 14643 | Gm10805 | 0.0000 | No |
| 14644 | Gm10807 | 0.0000 | No |
| 14645 | Gm10812 | 0.0000 | No |
| 14646 | Gm10813 | 0.0000 | No |
| 14647 | Gm10814 | 0.0000 | No |
| 14648 | Gm10819 | 0.0000 | No |
| 14649 | Gm10822 | 0.0000 | No |
| 14650 | Gm10825 | 0.0000 | No |
| 14651 | Gm10827 | 0.0000 | No |
| 14652 | Gm10829 | 0.0000 | No |
| 14653 | Gm10830 | 0.0000 | No |
| 14654 | Gm10837 | 0.0000 | No |
| 14655 | Gm10840 | 0.0000 | No |
| 14656 | Gm10842 | 0.0000 | No |
| 14657 | Gm10845 | 0.0000 | No |
| 14658 | Gm10848 | 0.0000 | No |
| 14659 | Gm10849 | 0.0000 | No |
| 14660 | Gm10851 | 0.0000 | No |
| 14661 | Gm10855 | 0.0000 | No |
| 14662 | Gm10857 | 0.0000 | No |
| 14663 | Gm10860 | 0.0000 | No |
| 14664 | Gm10863 | 0.0000 | No |
| 14665 | Gm10874 | 0.0000 | No |
| 14666 | Gm10913 | 0.0000 | No |
| 14667 | Gm10916 | 0.0000 | No |
| 14668 | Gm10921 | 0.0000 | No |
| 14669 | Gm10922 | 0.0000 | No |
| 14670 | Gm10923 | 0.0000 | No |
| 14671 | Gm10925 | 0.0000 | No |

|       |         |        |    |
|-------|---------|--------|----|
| 14672 | Gm10931 | 0.0000 | No |
| 14673 | Gm10936 | 0.0000 | No |
| 14674 | Gm10941 | 0.0000 | No |
| 14675 | Gm10944 | 0.0000 | No |
| 14676 | Gm10945 | 0.0000 | No |
| 14677 | Gm10959 | 0.0000 | No |
| 14678 | Gm10964 | 0.0000 | No |
| 14679 | Gm10972 | 0.0000 | No |
| 14680 | Gm10974 | 0.0000 | No |
| 14681 | Gm10985 | 0.0000 | No |
| 14682 | Gm10988 | 0.0000 | No |
| 14683 | Gm10997 | 0.0000 | No |
| 14684 | Gm10999 | 0.0000 | No |
| 14685 | Gm11007 | 0.0000 | No |
| 14686 | Gm11008 | 0.0000 | No |
| 14687 | Gm11009 | 0.0000 | No |
| 14688 | Gm11011 | 0.0000 | No |
| 14689 | Gm11020 | 0.0000 | No |
| 14690 | Gm11025 | 0.0000 | No |
| 14691 | Gm11027 | 0.0000 | No |
| 14692 | Gm11032 | 0.0000 | No |
| 14693 | Gm11033 | 0.0000 | No |
| 14694 | Gm11034 | 0.0000 | No |
| 14695 | Gm11037 | 0.0000 | No |
| 14696 | Gm11042 | 0.0000 | No |
| 14697 | Gm11060 | 0.0000 | No |
| 14698 | Gm11065 | 0.0000 | No |
| 14699 | Gm11077 | 0.0000 | No |
| 14700 | Gm11084 | 0.0000 | No |
| 14701 | Gm11096 | 0.0000 | No |
| 14702 | Gm11099 | 0.0000 | No |
| 14703 | Gm1110  | 0.0000 | No |
| 14704 | Gm11100 | 0.0000 | No |
| 14705 | Gm11105 | 0.0000 | No |
| 14706 | Gm11107 | 0.0000 | No |
| 14707 | Gm11109 | 0.0000 | No |
| 14708 | Gm11110 | 0.0000 | No |
| 14709 | Gm11111 | 0.0000 | No |
| 14710 | Gm11114 | 0.0000 | No |
| 14711 | Gm11115 | 0.0000 | No |
| 14712 | Gm11116 | 0.0000 | No |
| 14713 | Gm11127 | 0.0000 | No |
| 14714 | Gm1113  | 0.0000 | No |
| 14715 | Gm11131 | 0.0000 | No |
| 14716 | Gm11146 | 0.0000 | No |
| 14717 | Gm11149 | 0.0000 | No |



|       |         |        |    |
|-------|---------|--------|----|
| 14718 | Gm11168 | 0.0000 | No |
| 14719 | Gm11172 | 0.0000 | No |
| 14720 | Gm11175 | 0.0000 | No |
| 14721 | Gm11184 | 0.0000 | No |
| 14722 | Gm11185 | 0.0000 | No |
| 14723 | Gm11188 | 0.0000 | No |
| 14724 | Gm11189 | 0.0000 | No |
| 14725 | Gm11190 | 0.0000 | No |
| 14726 | Gm11191 | 0.0000 | No |
| 14727 | Gm11192 | 0.0000 | No |
| 14728 | Gm11193 | 0.0000 | No |
| 14729 | Gm11195 | 0.0000 | No |
| 14730 | Gm11196 | 0.0000 | No |
| 14731 | Gm11197 | 0.0000 | No |
| 14732 | Gm11198 | 0.0000 | No |
| 14733 | Gm11199 | 0.0000 | No |
| 14734 | Gm11200 | 0.0000 | No |
| 14735 | Gm11201 | 0.0000 | No |
| 14736 | Gm11203 | 0.0000 | No |
| 14737 | Gm11204 | 0.0000 | No |
| 14738 | Gm11205 | 0.0000 | No |
| 14739 | Gm11207 | 0.0000 | No |
| 14740 | Gm11209 | 0.0000 | No |
| 14741 | Gm11210 | 0.0000 | No |
| 14742 | Gm11211 | 0.0000 | No |
| 14743 | Gm11212 | 0.0000 | No |
| 14744 | Gm11214 | 0.0000 | No |
| 14745 | Gm11216 | 0.0000 | No |
| 14746 | Gm11217 | 0.0000 | No |
| 14747 | Gm11218 | 0.0000 | No |
| 14748 | Gm11219 | 0.0000 | No |
| 14749 | Gm11220 | 0.0000 | No |
| 14750 | Gm11221 | 0.0000 | No |
| 14751 | Gm11222 | 0.0000 | No |
| 14752 | Gm11223 | 0.0000 | No |
| 14753 | Gm11225 | 0.0000 | No |
| 14754 | Gm11226 | 0.0000 | No |
| 14755 | Gm11227 | 0.0000 | No |
| 14756 | Gm11228 | 0.0000 | No |
| 14757 | Gm1123  | 0.0000 | No |
| 14758 | Gm11232 | 0.0000 | No |
| 14759 | Gm11233 | 0.0000 | No |
| 14760 | Gm11234 | 0.0000 | No |
| 14761 | Gm11235 | 0.0000 | No |
| 14762 | Gm11236 | 0.0000 | No |
| 14763 | Gm11237 | 0.0000 | No |

|       |         |        |    |
|-------|---------|--------|----|
| 14764 | Gm11238 | 0.0000 | No |
| 14765 | Gm11239 | 0.0000 | No |
| 14766 | Gm11240 | 0.0000 | No |
| 14767 | Gm11241 | 0.0000 | No |
| 14768 | Gm11242 | 0.0000 | No |
| 14769 | Gm11243 | 0.0000 | No |
| 14770 | Gm11244 | 0.0000 | No |
| 14771 | Gm11245 | 0.0000 | No |
| 14772 | Gm11246 | 0.0000 | No |
| 14773 | Gm11249 | 0.0000 | No |
| 14774 | Gm11250 | 0.0000 | No |
| 14775 | Gm11251 | 0.0000 | No |
| 14776 | Gm11252 | 0.0000 | No |
| 14777 | Gm11253 | 0.0000 | No |
| 14778 | Gm11254 | 0.0000 | No |
| 14779 | Gm11255 | 0.0000 | No |
| 14780 | Gm11256 | 0.0000 | No |
| 14781 | Gm11257 | 0.0000 | No |
| 14782 | Gm11258 | 0.0000 | No |
| 14783 | Gm11259 | 0.0000 | No |
| 14784 | Gm11260 | 0.0000 | No |
| 14785 | Gm11261 | 0.0000 | No |
| 14786 | Gm11262 | 0.0000 | No |
| 14787 | Gm11263 | 0.0000 | No |
| 14788 | Gm11264 | 0.0000 | No |
| 14789 | Gm11266 | 0.0000 | No |
| 14790 | Gm11267 | 0.0000 | No |
| 14791 | Gm11268 | 0.0000 | No |
| 14792 | Gm11269 | 0.0000 | No |
| 14793 | Gm11270 | 0.0000 | No |
| 14794 | Gm11271 | 0.0000 | No |
| 14795 | Gm11273 | 0.0000 | No |
| 14796 | Gm11274 | 0.0000 | No |
| 14797 | Gm11278 | 0.0000 | No |
| 14798 | Gm11280 | 0.0000 | No |
| 14799 | Gm11281 | 0.0000 | No |
| 14800 | Gm11282 | 0.0000 | No |
| 14801 | Gm11284 | 0.0000 | No |
| 14802 | Gm11285 | 0.0000 | No |
| 14803 | Gm11290 | 0.0000 | No |
| 14804 | Gm11291 | 0.0000 | No |
| 14805 | Gm11295 | 0.0000 | No |
| 14806 | Gm11298 | 0.0000 | No |
| 14807 | Gm11300 | 0.0000 | No |
| 14808 | Gm11307 | 0.0000 | No |
| 14809 | Gm11309 | 0.0000 | No |

|       |         |        |    |
|-------|---------|--------|----|
| 14810 | Gm11313 | 0.0000 | No |
| 14811 | Gm11314 | 0.0000 | No |
| 14812 | Gm11318 | 0.0000 | No |
| 14813 | Gm11320 | 0.0000 | No |
| 14814 | Gm11321 | 0.0000 | No |
| 14815 | Gm11322 | 0.0000 | No |
| 14816 | Gm11325 | 0.0000 | No |
| 14817 | Gm11331 | 0.0000 | No |
| 14818 | Gm11333 | 0.0000 | No |
| 14819 | Gm11334 | 0.0000 | No |
| 14820 | Gm11336 | 0.0000 | No |
| 14821 | Gm11337 | 0.0000 | No |
| 14822 | Gm11338 | 0.0000 | No |
| 14823 | Gm11339 | 0.0000 | No |
| 14824 | Gm11340 | 0.0000 | No |
| 14825 | Gm11342 | 0.0000 | No |
| 14826 | Gm11343 | 0.0000 | No |
| 14827 | Gm11344 | 0.0000 | No |
| 14828 | Gm11345 | 0.0000 | No |
| 14829 | Gm11346 | 0.0000 | No |
| 14830 | Gm11348 | 0.0000 | No |
| 14831 | Gm11349 | 0.0000 | No |
| 14832 | Gm11351 | 0.0000 | No |
| 14833 | Gm11352 | 0.0000 | No |
| 14834 | Gm11353 | 0.0000 | No |
| 14835 | Gm11354 | 0.0000 | No |
| 14836 | Gm11355 | 0.0000 | No |
| 14837 | Gm11356 | 0.0000 | No |
| 14838 | Gm11357 | 0.0000 | No |
| 14839 | Gm11358 | 0.0000 | No |
| 14840 | Gm11360 | 0.0000 | No |
| 14841 | Gm11361 | 0.0000 | No |
| 14842 | Gm11362 | 0.0000 | No |
| 14843 | Gm11363 | 0.0000 | No |
| 14844 | Gm11364 | 0.0000 | No |
| 14845 | Gm11365 | 0.0000 | No |
| 14846 | Gm11366 | 0.0000 | No |
| 14847 | Gm11367 | 0.0000 | No |
| 14848 | Gm11368 | 0.0000 | No |
| 14849 | Gm11369 | 0.0000 | No |
| 14850 | Gm11370 | 0.0000 | No |
| 14851 | Gm11371 | 0.0000 | No |
| 14852 | Gm11372 | 0.0000 | No |
| 14853 | Gm11373 | 0.0000 | No |
| 14854 | Gm11374 | 0.0000 | No |
| 14855 | Gm11375 | 0.0000 | No |

|       |         |        |    |
|-------|---------|--------|----|
| 14856 | Gm11376 | 0.0000 | No |
| 14857 | Gm11377 | 0.0000 | No |
| 14858 | Gm11378 | 0.0000 | No |
| 14859 | Gm11379 | 0.0000 | No |
| 14860 | Gm11380 | 0.0000 | No |
| 14861 | Gm11381 | 0.0000 | No |
| 14862 | Gm11382 | 0.0000 | No |
| 14863 | Gm11383 | 0.0000 | No |
| 14864 | Gm11385 | 0.0000 | No |
| 14865 | Gm11386 | 0.0000 | No |
| 14866 | Gm11387 | 0.0000 | No |
| 14867 | Gm11388 | 0.0000 | No |
| 14868 | Gm11389 | 0.0000 | No |
| 14869 | Gm11392 | 0.0000 | No |
| 14870 | Gm11393 | 0.0000 | No |
| 14871 | Gm11394 | 0.0000 | No |
| 14872 | Gm11395 | 0.0000 | No |
| 14873 | Gm11397 | 0.0000 | No |
| 14874 | Gm11398 | 0.0000 | No |
| 14875 | Gm11399 | 0.0000 | No |
| 14876 | Gm1140  | 0.0000 | No |
| 14877 | Gm11400 | 0.0000 | No |
| 14878 | Gm11401 | 0.0000 | No |
| 14879 | Gm11403 | 0.0000 | No |
| 14880 | Gm11404 | 0.0000 | No |
| 14881 | Gm11405 | 0.0000 | No |
| 14882 | Gm11406 | 0.0000 | No |
| 14883 | Gm11407 | 0.0000 | No |
| 14884 | Gm1141  | 0.0000 | No |
| 14885 | Gm11410 | 0.0000 | No |
| 14886 | Gm11411 | 0.0000 | No |
| 14887 | Gm11412 | 0.0000 | No |
| 14888 | Gm11413 | 0.0000 | No |
| 14889 | Gm11414 | 0.0000 | No |
| 14890 | Gm11416 | 0.0000 | No |
| 14891 | Gm11420 | 0.0000 | No |
| 14892 | Gm11421 | 0.0000 | No |
| 14893 | Gm11423 | 0.0000 | No |
| 14894 | Gm11424 | 0.0000 | No |
| 14895 | Gm11425 | 0.0000 | No |
| 14896 | Gm11426 | 0.0000 | No |
| 14897 | Gm11427 | 0.0000 | No |
| 14898 | Gm11429 | 0.0000 | No |
| 14899 | Gm11430 | 0.0000 | No |
| 14900 | Gm11431 | 0.0000 | No |
| 14901 | Gm11432 | 0.0000 | No |

|       |         |        |    |
|-------|---------|--------|----|
| 14902 | Gm11433 | 0.0000 | No |
| 14903 | Gm11434 | 0.0000 | No |
| 14904 | Gm11438 | 0.0000 | No |
| 14905 | Gm11439 | 0.0000 | No |
| 14906 | Gm11440 | 0.0000 | No |
| 14907 | Gm11444 | 0.0000 | No |
| 14908 | Gm11445 | 0.0000 | No |
| 14909 | Gm11447 | 0.0000 | No |
| 14910 | Gm11448 | 0.0000 | No |
| 14911 | Gm11449 | 0.0000 | No |
| 14912 | Gm11450 | 0.0000 | No |
| 14913 | Gm11451 | 0.0000 | No |
| 14914 | Gm11452 | 0.0000 | No |
| 14915 | Gm11453 | 0.0000 | No |
| 14916 | Gm11454 | 0.0000 | No |
| 14917 | Gm11455 | 0.0000 | No |
| 14918 | Gm11456 | 0.0000 | No |
| 14919 | Gm11457 | 0.0000 | No |
| 14920 | Gm11461 | 0.0000 | No |
| 14921 | Gm11464 | 0.0000 | No |
| 14922 | Gm11466 | 0.0000 | No |
| 14923 | Gm11467 | 0.0000 | No |
| 14924 | Gm11468 | 0.0000 | No |
| 14925 | Gm11469 | 0.0000 | No |
| 14926 | Gm11470 | 0.0000 | No |
| 14927 | Gm11471 | 0.0000 | No |
| 14928 | Gm11472 | 0.0000 | No |
| 14929 | Gm11473 | 0.0000 | No |
| 14930 | Gm11474 | 0.0000 | No |
| 14931 | Gm11475 | 0.0000 | No |
| 14932 | Gm11476 | 0.0000 | No |
| 14933 | Gm11478 | 0.0000 | No |
| 14934 | Gm11479 | 0.0000 | No |
| 14935 | Gm11480 | 0.0000 | No |
| 14936 | Gm11481 | 0.0000 | No |
| 14937 | Gm11482 | 0.0000 | No |
| 14938 | Gm11483 | 0.0000 | No |
| 14939 | Gm11484 | 0.0000 | No |
| 14940 | Gm11486 | 0.0000 | No |
| 14941 | Gm11487 | 0.0000 | No |
| 14942 | Gm11488 | 0.0000 | No |
| 14943 | Gm11489 | 0.0000 | No |
| 14944 | Gm11490 | 0.0000 | No |
| 14945 | Gm11491 | 0.0000 | No |
| 14946 | Gm11492 | 0.0000 | No |
| 14947 | Gm11493 | 0.0000 | No |

|       |         |        |    |
|-------|---------|--------|----|
| 14948 | Gm11494 | 0.0000 | No |
| 14949 | Gm11497 | 0.0000 | No |
| 14950 | Gm11500 | 0.0000 | No |
| 14951 | Gm11501 | 0.0000 | No |
| 14952 | Gm11502 | 0.0000 | No |
| 14953 | Gm11504 | 0.0000 | No |
| 14954 | Gm11506 | 0.0000 | No |
| 14955 | Gm11507 | 0.0000 | No |
| 14956 | Gm11508 | 0.0000 | No |
| 14957 | Gm11509 | 0.0000 | No |
| 14958 | Gm11510 | 0.0000 | No |
| 14959 | Gm11511 | 0.0000 | No |
| 14960 | Gm11512 | 0.0000 | No |
| 14961 | Gm11514 | 0.0000 | No |
| 14962 | Gm11516 | 0.0000 | No |
| 14963 | Gm11517 | 0.0000 | No |
| 14964 | Gm11518 | 0.0000 | No |
| 14965 | Gm11520 | 0.0000 | No |
| 14966 | Gm11521 | 0.0000 | No |
| 14967 | Gm11522 | 0.0000 | No |
| 14968 | Gm11523 | 0.0000 | No |
| 14969 | Gm11524 | 0.0000 | No |
| 14970 | Gm11525 | 0.0000 | No |
| 14971 | Gm11528 | 0.0000 | No |
| 14972 | Gm11529 | 0.0000 | No |
| 14973 | Gm11531 | 0.0000 | No |
| 14974 | Gm11532 | 0.0000 | No |
| 14975 | Gm11533 | 0.0000 | No |
| 14976 | Gm11534 | 0.0000 | No |
| 14977 | Gm11535 | 0.0000 | No |
| 14978 | Gm11536 | 0.0000 | No |
| 14979 | Gm11537 | 0.0000 | No |
| 14980 | Gm11539 | 0.0000 | No |
| 14981 | Gm11541 | 0.0000 | No |
| 14982 | Gm11542 | 0.0000 | No |
| 14983 | Gm11543 | 0.0000 | No |
| 14984 | Gm11544 | 0.0000 | No |
| 14985 | Gm11548 | 0.0000 | No |
| 14986 | Gm11549 | 0.0000 | No |
| 14987 | Gm11550 | 0.0000 | No |
| 14988 | Gm11553 | 0.0000 | No |
| 14989 | Gm11554 | 0.0000 | No |
| 14990 | Gm11555 | 0.0000 | No |
| 14991 | Gm11556 | 0.0000 | No |
| 14992 | Gm11557 | 0.0000 | No |
| 14993 | Gm11558 | 0.0000 | No |

|       |         |        |    |
|-------|---------|--------|----|
| 14994 | Gm11559 | 0.0000 | No |
| 14995 | Gm11560 | 0.0000 | No |
| 14996 | Gm11562 | 0.0000 | No |
| 14997 | Gm11563 | 0.0000 | No |
| 14998 | Gm11564 | 0.0000 | No |
| 14999 | Gm11565 | 0.0000 | No |
| 15000 | Gm11566 | 0.0000 | No |
| 15001 | Gm11567 | 0.0000 | No |
| 15002 | Gm11568 | 0.0000 | No |
| 15003 | Gm11569 | 0.0000 | No |
| 15004 | Gm11571 | 0.0000 | No |
| 15005 | Gm11572 | 0.0000 | No |
| 15006 | Gm11573 | 0.0000 | No |
| 15007 | Gm11574 | 0.0000 | No |
| 15008 | Gm11575 | 0.0000 | No |
| 15009 | Gm11576 | 0.0000 | No |
| 15010 | Gm11577 | 0.0000 | No |
| 15011 | Gm11578 | 0.0000 | No |
| 15012 | Gm11579 | 0.0000 | No |
| 15013 | Gm11581 | 0.0000 | No |
| 15014 | Gm11582 | 0.0000 | No |
| 15015 | Gm11583 | 0.0000 | No |
| 15016 | Gm11584 | 0.0000 | No |
| 15017 | Gm11586 | 0.0000 | No |
| 15018 | Gm11588 | 0.0000 | No |
| 15019 | Gm11590 | 0.0000 | No |
| 15020 | Gm11591 | 0.0000 | No |
| 15021 | Gm11592 | 0.0000 | No |
| 15022 | Gm11594 | 0.0000 | No |
| 15023 | Gm11595 | 0.0000 | No |
| 15024 | Gm11596 | 0.0000 | No |
| 15025 | Gm11598 | 0.0000 | No |
| 15026 | Gm11599 | 0.0000 | No |
| 15027 | Gm11600 | 0.0000 | No |
| 15028 | Gm11604 | 0.0000 | No |
| 15029 | Gm11605 | 0.0000 | No |
| 15030 | Gm11608 | 0.0000 | No |
| 15031 | Gm11609 | 0.0000 | No |
| 15032 | Gm11611 | 0.0000 | No |
| 15033 | Gm11613 | 0.0000 | No |
| 15034 | Gm11614 | 0.0000 | No |
| 15035 | Gm11615 | 0.0000 | No |
| 15036 | Gm11617 | 0.0000 | No |
| 15037 | Gm11618 | 0.0000 | No |
| 15038 | Gm11619 | 0.0000 | No |
| 15039 | Gm11620 | 0.0000 | No |

|       |         |        |    |
|-------|---------|--------|----|
| 15040 | Gm11621 | 0.0000 | No |
| 15041 | Gm11623 | 0.0000 | No |
| 15042 | Gm11624 | 0.0000 | No |
| 15043 | Gm11625 | 0.0000 | No |
| 15044 | Gm11626 | 0.0000 | No |
| 15045 | Gm11627 | 0.0000 | No |
| 15046 | Gm11628 | 0.0000 | No |
| 15047 | Gm11629 | 0.0000 | No |
| 15048 | Gm11630 | 0.0000 | No |
| 15049 | Gm11631 | 0.0000 | No |
| 15050 | Gm11632 | 0.0000 | No |
| 15051 | Gm11633 | 0.0000 | No |
| 15052 | Gm11634 | 0.0000 | No |
| 15053 | Gm11635 | 0.0000 | No |
| 15054 | Gm11636 | 0.0000 | No |
| 15055 | Gm11637 | 0.0000 | No |
| 15056 | Gm11638 | 0.0000 | No |
| 15057 | Gm11640 | 0.0000 | No |
| 15058 | Gm11642 | 0.0000 | No |
| 15059 | Gm11643 | 0.0000 | No |
| 15060 | Gm11644 | 0.0000 | No |
| 15061 | Gm11645 | 0.0000 | No |
| 15062 | Gm11649 | 0.0000 | No |
| 15063 | Gm11650 | 0.0000 | No |
| 15064 | Gm11651 | 0.0000 | No |
| 15065 | Gm11652 | 0.0000 | No |
| 15066 | Gm11653 | 0.0000 | No |
| 15067 | Gm11655 | 0.0000 | No |
| 15068 | Gm11656 | 0.0000 | No |
| 15069 | Gm11657 | 0.0000 | No |
| 15070 | Gm11658 | 0.0000 | No |
| 15071 | Gm11659 | 0.0000 | No |
| 15072 | Gm11660 | 0.0000 | No |
| 15073 | Gm11661 | 0.0000 | No |
| 15074 | Gm11662 | 0.0000 | No |
| 15075 | Gm11663 | 0.0000 | No |
| 15076 | Gm11667 | 0.0000 | No |
| 15077 | Gm11668 | 0.0000 | No |
| 15078 | Gm11670 | 0.0000 | No |
| 15079 | Gm11672 | 0.0000 | No |
| 15080 | Gm11674 | 0.0000 | No |
| 15081 | Gm11675 | 0.0000 | No |
| 15082 | Gm11676 | 0.0000 | No |
| 15083 | Gm11677 | 0.0000 | No |
| 15084 | Gm11679 | 0.0000 | No |
| 15085 | Gm11680 | 0.0000 | No |



|       |         |        |    |
|-------|---------|--------|----|
| 15086 | Gm11681 | 0.0000 | No |
| 15087 | Gm11683 | 0.0000 | No |
| 15088 | Gm11684 | 0.0000 | No |
| 15089 | Gm11685 | 0.0000 | No |
| 15090 | Gm11686 | 0.0000 | No |
| 15091 | Gm11687 | 0.0000 | No |
| 15092 | Gm11688 | 0.0000 | No |
| 15093 | Gm11689 | 0.0000 | No |
| 15094 | Gm11690 | 0.0000 | No |
| 15095 | Gm11691 | 0.0000 | No |
| 15096 | Gm11692 | 0.0000 | No |
| 15097 | Gm11693 | 0.0000 | No |
| 15098 | Gm11694 | 0.0000 | No |
| 15099 | Gm11696 | 0.0000 | No |
| 15100 | Gm11697 | 0.0000 | No |
| 15101 | Gm11698 | 0.0000 | No |
| 15102 | Gm11700 | 0.0000 | No |
| 15103 | Gm11701 | 0.0000 | No |
| 15104 | Gm11702 | 0.0000 | No |
| 15105 | Gm11703 | 0.0000 | No |
| 15106 | Gm11704 | 0.0000 | No |
| 15107 | Gm11707 | 0.0000 | No |
| 15108 | Gm11708 | 0.0000 | No |
| 15109 | Gm11714 | 0.0000 | No |
| 15110 | Gm11715 | 0.0000 | No |
| 15111 | Gm11716 | 0.0000 | No |
| 15112 | Gm11718 | 0.0000 | No |
| 15113 | Gm11719 | 0.0000 | No |
| 15114 | Gm11722 | 0.0000 | No |
| 15115 | Gm11723 | 0.0000 | No |
| 15116 | Gm11724 | 0.0000 | No |
| 15117 | Gm11725 | 0.0000 | No |
| 15118 | Gm11726 | 0.0000 | No |
| 15119 | Gm11728 | 0.0000 | No |
| 15120 | Gm11729 | 0.0000 | No |
| 15121 | Gm11733 | 0.0000 | No |
| 15122 | Gm11735 | 0.0000 | No |
| 15123 | Gm11736 | 0.0000 | No |
| 15124 | Gm11737 | 0.0000 | No |
| 15125 | Gm11738 | 0.0000 | No |
| 15126 | Gm11739 | 0.0000 | No |
| 15127 | Gm11742 | 0.0000 | No |
| 15128 | Gm11743 | 0.0000 | No |
| 15129 | Gm11745 | 0.0000 | No |
| 15130 | Gm11746 | 0.0000 | No |
| 15131 | Gm11747 | 0.0000 | No |

|       |         |        |    |
|-------|---------|--------|----|
| 15132 | Gm11748 | 0.0000 | No |
| 15133 | Gm11749 | 0.0000 | No |
| 15134 | Gm11751 | 0.0000 | No |
| 15135 | Gm11752 | 0.0000 | No |
| 15136 | Gm11753 | 0.0000 | No |
| 15137 | Gm11754 | 0.0000 | No |
| 15138 | Gm11757 | 0.0000 | No |
| 15139 | Gm11758 | 0.0000 | No |
| 15140 | Gm11759 | 0.0000 | No |
| 15141 | Gm11760 | 0.0000 | No |
| 15142 | Gm11761 | 0.0000 | No |
| 15143 | Gm11762 | 0.0000 | No |
| 15144 | Gm11764 | 0.0000 | No |
| 15145 | Gm11765 | 0.0000 | No |
| 15146 | Gm11766 | 0.0000 | No |
| 15147 | Gm11767 | 0.0000 | No |
| 15148 | Gm11769 | 0.0000 | No |
| 15149 | Gm11770 | 0.0000 | No |
| 15150 | Gm11771 | 0.0000 | No |
| 15151 | Gm11772 | 0.0000 | No |
| 15152 | Gm11773 | 0.0000 | No |
| 15153 | Gm11774 | 0.0000 | No |
| 15154 | Gm11779 | 0.0000 | No |
| 15155 | Gm11780 | 0.0000 | No |
| 15156 | Gm11783 | 0.0000 | No |
| 15157 | Gm11784 | 0.0000 | No |
| 15158 | Gm11785 | 0.0000 | No |
| 15159 | Gm11786 | 0.0000 | No |
| 15160 | Gm11787 | 0.0000 | No |
| 15161 | Gm11789 | 0.0000 | No |
| 15162 | Gm11791 | 0.0000 | No |
| 15163 | Gm11792 | 0.0000 | No |
| 15164 | Gm11793 | 0.0000 | No |
| 15165 | Gm11794 | 0.0000 | No |
| 15166 | Gm11795 | 0.0000 | No |
| 15167 | Gm11796 | 0.0000 | No |
| 15168 | Gm11797 | 0.0000 | No |
| 15169 | Gm11798 | 0.0000 | No |
| 15170 | Gm11799 | 0.0000 | No |
| 15171 | Gm11800 | 0.0000 | No |
| 15172 | Gm11801 | 0.0000 | No |
| 15173 | Gm11803 | 0.0000 | No |
| 15174 | Gm11804 | 0.0000 | No |
| 15175 | Gm11808 | 0.0000 | No |
| 15176 | Gm11814 | 0.0000 | No |
| 15177 | Gm11816 | 0.0000 | No |

|       |         |        |    |
|-------|---------|--------|----|
| 15178 | Gm11817 | 0.0000 | No |
| 15179 | Gm11819 | 0.0000 | No |
| 15180 | Gm11820 | 0.0000 | No |
| 15181 | Gm11821 | 0.0000 | No |
| 15182 | Gm11822 | 0.0000 | No |
| 15183 | Gm11823 | 0.0000 | No |
| 15184 | Gm11824 | 0.0000 | No |
| 15185 | Gm11826 | 0.0000 | No |
| 15186 | Gm11827 | 0.0000 | No |
| 15187 | Gm11829 | 0.0000 | No |
| 15188 | Gm11830 | 0.0000 | No |
| 15189 | Gm11831 | 0.0000 | No |
| 15190 | Gm11832 | 0.0000 | No |
| 15191 | Gm11833 | 0.0000 | No |
| 15192 | Gm11834 | 0.0000 | No |
| 15193 | Gm11835 | 0.0000 | No |
| 15194 | Gm11836 | 0.0000 | No |
| 15195 | Gm11838 | 0.0000 | No |
| 15196 | Gm11839 | 0.0000 | No |
| 15197 | Gm11841 | 0.0000 | No |
| 15198 | Gm11842 | 0.0000 | No |
| 15199 | Gm11843 | 0.0000 | No |
| 15200 | Gm11845 | 0.0000 | No |
| 15201 | Gm11846 | 0.0000 | No |
| 15202 | Gm11847 | 0.0000 | No |
| 15203 | Gm11849 | 0.0000 | No |
| 15204 | Gm11850 | 0.0000 | No |
| 15205 | Gm11852 | 0.0000 | No |
| 15206 | Gm11853 | 0.0000 | No |
| 15207 | Gm11854 | 0.0000 | No |
| 15208 | Gm11855 | 0.0000 | No |
| 15209 | Gm11856 | 0.0000 | No |
| 15210 | Gm11857 | 0.0000 | No |
| 15211 | Gm11858 | 0.0000 | No |
| 15212 | Gm11859 | 0.0000 | No |
| 15213 | Gm11860 | 0.0000 | No |
| 15214 | Gm11862 | 0.0000 | No |
| 15215 | Gm11865 | 0.0000 | No |
| 15216 | Gm11867 | 0.0000 | No |
| 15217 | Gm11868 | 0.0000 | No |
| 15218 | Gm11869 | 0.0000 | No |
| 15219 | Gm11870 | 0.0000 | No |
| 15220 | Gm11871 | 0.0000 | No |
| 15221 | Gm11872 | 0.0000 | No |
| 15222 | Gm11873 | 0.0000 | No |
| 15223 | Gm11875 | 0.0000 | No |

|       |         |        |    |
|-------|---------|--------|----|
| 15224 | Gm11876 | 0.0000 | No |
| 15225 | Gm11878 | 0.0000 | No |
| 15226 | Gm11879 | 0.0000 | No |
| 15227 | Gm11880 | 0.0000 | No |
| 15228 | Gm11882 | 0.0000 | No |
| 15229 | Gm11884 | 0.0000 | No |
| 15230 | Gm11885 | 0.0000 | No |
| 15231 | Gm11888 | 0.0000 | No |
| 15232 | Gm11889 | 0.0000 | No |
| 15233 | Gm11890 | 0.0000 | No |
| 15234 | Gm11891 | 0.0000 | No |
| 15235 | Gm11892 | 0.0000 | No |
| 15236 | Gm11893 | 0.0000 | No |
| 15237 | Gm11894 | 0.0000 | No |
| 15238 | Gm11895 | 0.0000 | No |
| 15239 | Gm11897 | 0.0000 | No |
| 15240 | Gm11898 | 0.0000 | No |
| 15241 | Gm11899 | 0.0000 | No |
| 15242 | Gm11901 | 0.0000 | No |
| 15243 | Gm11902 | 0.0000 | No |
| 15244 | Gm11903 | 0.0000 | No |
| 15245 | Gm11904 | 0.0000 | No |
| 15246 | Gm11905 | 0.0000 | No |
| 15247 | Gm11908 | 0.0000 | No |
| 15248 | Gm11909 | 0.0000 | No |
| 15249 | Gm11910 | 0.0000 | No |
| 15250 | Gm11911 | 0.0000 | No |
| 15251 | Gm11913 | 0.0000 | No |
| 15252 | Gm11914 | 0.0000 | No |
| 15253 | Gm11915 | 0.0000 | No |
| 15254 | Gm11916 | 0.0000 | No |
| 15255 | Gm11918 | 0.0000 | No |
| 15256 | Gm11919 | 0.0000 | No |
| 15257 | Gm11920 | 0.0000 | No |
| 15258 | Gm11922 | 0.0000 | No |
| 15259 | Gm11923 | 0.0000 | No |
| 15260 | Gm11924 | 0.0000 | No |
| 15261 | Gm11925 | 0.0000 | No |
| 15262 | Gm11926 | 0.0000 | No |
| 15263 | Gm11927 | 0.0000 | No |
| 15264 | Gm11928 | 0.0000 | No |
| 15265 | Gm11929 | 0.0000 | No |
| 15266 | Gm11930 | 0.0000 | No |
| 15267 | Gm11931 | 0.0000 | No |
| 15268 | Gm11934 | 0.0000 | No |
| 15269 | Gm11935 | 0.0000 | No |

|       |         |        |    |
|-------|---------|--------|----|
| 15270 | Gm11937 | 0.0000 | No |
| 15271 | Gm11940 | 0.0000 | No |
| 15272 | Gm11941 | 0.0000 | No |
| 15273 | Gm11942 | 0.0000 | No |
| 15274 | Gm11943 | 0.0000 | No |
| 15275 | Gm11944 | 0.0000 | No |
| 15276 | Gm11945 | 0.0000 | No |
| 15277 | Gm11946 | 0.0000 | No |
| 15278 | Gm11947 | 0.0000 | No |
| 15279 | Gm11948 | 0.0000 | No |
| 15280 | Gm11949 | 0.0000 | No |
| 15281 | Gm11951 | 0.0000 | No |
| 15282 | Gm11952 | 0.0000 | No |
| 15283 | Gm11953 | 0.0000 | No |
| 15284 | Gm11954 | 0.0000 | No |
| 15285 | Gm11955 | 0.0000 | No |
| 15286 | Gm11956 | 0.0000 | No |
| 15287 | Gm11957 | 0.0000 | No |
| 15288 | Gm11958 | 0.0000 | No |
| 15289 | Gm11959 | 0.0000 | No |
| 15290 | Gm11960 | 0.0000 | No |
| 15291 | Gm11962 | 0.0000 | No |
| 15292 | Gm11963 | 0.0000 | No |
| 15293 | Gm11964 | 0.0000 | No |
| 15294 | Gm11965 | 0.0000 | No |
| 15295 | Gm11966 | 0.0000 | No |
| 15296 | Gm11967 | 0.0000 | No |
| 15297 | Gm11969 | 0.0000 | No |
| 15298 | Gm11971 | 0.0000 | No |
| 15299 | Gm11972 | 0.0000 | No |
| 15300 | Gm11973 | 0.0000 | No |
| 15301 | Gm11975 | 0.0000 | No |
| 15302 | Gm11977 | 0.0000 | No |
| 15303 | Gm11978 | 0.0000 | No |
| 15304 | Gm11979 | 0.0000 | No |
| 15305 | Gm11980 | 0.0000 | No |
| 15306 | Gm11981 | 0.0000 | No |
| 15307 | Gm11983 | 0.0000 | No |
| 15308 | Gm11984 | 0.0000 | No |
| 15309 | Gm11985 | 0.0000 | No |
| 15310 | Gm11986 | 0.0000 | No |
| 15311 | Gm11987 | 0.0000 | No |
| 15312 | Gm11988 | 0.0000 | No |
| 15313 | Gm11989 | 0.0000 | No |
| 15314 | Gm11990 | 0.0000 | No |
| 15315 | Gm11991 | 0.0000 | No |

|       |         |        |    |
|-------|---------|--------|----|
| 15316 | Gm11992 | 0.0000 | No |
| 15317 | Gm11993 | 0.0000 | No |
| 15318 | Gm11996 | 0.0000 | No |
| 15319 | Gm11997 | 0.0000 | No |
| 15320 | Gm11998 | 0.0000 | No |
| 15321 | Gm12000 | 0.0000 | No |
| 15322 | Gm12001 | 0.0000 | No |
| 15323 | Gm12002 | 0.0000 | No |
| 15324 | Gm12003 | 0.0000 | No |
| 15325 | Gm12004 | 0.0000 | No |
| 15326 | Gm12005 | 0.0000 | No |
| 15327 | Gm12007 | 0.0000 | No |
| 15328 | Gm12008 | 0.0000 | No |
| 15329 | Gm12009 | 0.0000 | No |
| 15330 | Gm12011 | 0.0000 | No |
| 15331 | Gm12012 | 0.0000 | No |
| 15332 | Gm12013 | 0.0000 | No |
| 15333 | Gm12014 | 0.0000 | No |
| 15334 | Gm12015 | 0.0000 | No |
| 15335 | Gm12016 | 0.0000 | No |
| 15336 | Gm12017 | 0.0000 | No |
| 15337 | Gm12018 | 0.0000 | No |
| 15338 | Gm12019 | 0.0000 | No |
| 15339 | Gm12020 | 0.0000 | No |
| 15340 | Gm12021 | 0.0000 | No |
| 15341 | Gm12022 | 0.0000 | No |
| 15342 | Gm12024 | 0.0000 | No |
| 15343 | Gm12025 | 0.0000 | No |
| 15344 | Gm12026 | 0.0000 | No |
| 15345 | Gm12028 | 0.0000 | No |
| 15346 | Gm12029 | 0.0000 | No |
| 15347 | Gm12030 | 0.0000 | No |
| 15348 | Gm12031 | 0.0000 | No |
| 15349 | Gm12033 | 0.0000 | No |
| 15350 | Gm12034 | 0.0000 | No |
| 15351 | Gm12035 | 0.0000 | No |
| 15352 | Gm12036 | 0.0000 | No |
| 15353 | Gm12037 | 0.0000 | No |
| 15354 | Gm12038 | 0.0000 | No |
| 15355 | Gm12039 | 0.0000 | No |
| 15356 | Gm12040 | 0.0000 | No |
| 15357 | Gm12042 | 0.0000 | No |
| 15358 | Gm12044 | 0.0000 | No |
| 15359 | Gm12045 | 0.0000 | No |
| 15360 | Gm12046 | 0.0000 | No |
| 15361 | Gm12047 | 0.0000 | No |

|       |         |        |    |
|-------|---------|--------|----|
| 15362 | Gm12050 | 0.0000 | No |
| 15363 | Gm12052 | 0.0000 | No |
| 15364 | Gm12053 | 0.0000 | No |
| 15365 | Gm12055 | 0.0000 | No |
| 15366 | Gm12057 | 0.0000 | No |
| 15367 | Gm12058 | 0.0000 | No |
| 15368 | Gm12059 | 0.0000 | No |
| 15369 | Gm12060 | 0.0000 | No |
| 15370 | Gm12061 | 0.0000 | No |
| 15371 | Gm12062 | 0.0000 | No |
| 15372 | Gm12064 | 0.0000 | No |
| 15373 | Gm12066 | 0.0000 | No |
| 15374 | Gm12067 | 0.0000 | No |
| 15375 | Gm12068 | 0.0000 | No |
| 15376 | Gm12069 | 0.0000 | No |
| 15377 | Gm12070 | 0.0000 | No |
| 15378 | Gm12072 | 0.0000 | No |
| 15379 | Gm12073 | 0.0000 | No |
| 15380 | Gm12074 | 0.0000 | No |
| 15381 | Gm12075 | 0.0000 | No |
| 15382 | Gm12077 | 0.0000 | No |
| 15383 | Gm12079 | 0.0000 | No |
| 15384 | Gm12081 | 0.0000 | No |
| 15385 | Gm12082 | 0.0000 | No |
| 15386 | Gm12085 | 0.0000 | No |
| 15387 | Gm12086 | 0.0000 | No |
| 15388 | Gm12087 | 0.0000 | No |
| 15389 | Gm12088 | 0.0000 | No |
| 15390 | Gm12089 | 0.0000 | No |
| 15391 | Gm12090 | 0.0000 | No |
| 15392 | Gm12091 | 0.0000 | No |
| 15393 | Gm12092 | 0.0000 | No |
| 15394 | Gm12093 | 0.0000 | No |
| 15395 | Gm12094 | 0.0000 | No |
| 15396 | Gm12095 | 0.0000 | No |
| 15397 | Gm12096 | 0.0000 | No |
| 15398 | Gm12097 | 0.0000 | No |
| 15399 | Gm12098 | 0.0000 | No |
| 15400 | Gm12099 | 0.0000 | No |
| 15401 | Gm12100 | 0.0000 | No |
| 15402 | Gm12101 | 0.0000 | No |
| 15403 | Gm12103 | 0.0000 | No |
| 15404 | Gm12104 | 0.0000 | No |
| 15405 | Gm12105 | 0.0000 | No |
| 15406 | Gm12106 | 0.0000 | No |
| 15407 | Gm12107 | 0.0000 | No |

|       |         |        |    |
|-------|---------|--------|----|
| 15408 | Gm12108 | 0.0000 | No |
| 15409 | Gm12109 | 0.0000 | No |
| 15410 | Gm12110 | 0.0000 | No |
| 15411 | Gm12111 | 0.0000 | No |
| 15412 | Gm12112 | 0.0000 | No |
| 15413 | Gm12114 | 0.0000 | No |
| 15414 | Gm12115 | 0.0000 | No |
| 15415 | Gm12116 | 0.0000 | No |
| 15416 | Gm12117 | 0.0000 | No |
| 15417 | Gm12118 | 0.0000 | No |
| 15418 | Gm12121 | 0.0000 | No |
| 15419 | Gm12122 | 0.0000 | No |
| 15420 | Gm12124 | 0.0000 | No |
| 15421 | Gm12125 | 0.0000 | No |
| 15422 | Gm12127 | 0.0000 | No |
| 15423 | Gm12128 | 0.0000 | No |
| 15424 | Gm12129 | 0.0000 | No |
| 15425 | Gm12130 | 0.0000 | No |
| 15426 | Gm12133 | 0.0000 | No |
| 15427 | Gm12134 | 0.0000 | No |
| 15428 | Gm12136 | 0.0000 | No |
| 15429 | Gm12137 | 0.0000 | No |
| 15430 | Gm12138 | 0.0000 | No |
| 15431 | Gm12140 | 0.0000 | No |
| 15432 | Gm12143 | 0.0000 | No |
| 15433 | Gm12146 | 0.0000 | No |
| 15434 | Gm12147 | 0.0000 | No |
| 15435 | Gm12148 | 0.0000 | No |
| 15436 | Gm12149 | 0.0000 | No |
| 15437 | Gm12150 | 0.0000 | No |
| 15438 | Gm12151 | 0.0000 | No |
| 15439 | Gm12152 | 0.0000 | No |
| 15440 | Gm12154 | 0.0000 | No |
| 15441 | Gm12155 | 0.0000 | No |
| 15442 | Gm12156 | 0.0000 | No |
| 15443 | Gm12159 | 0.0000 | No |
| 15444 | Gm12160 | 0.0000 | No |
| 15445 | Gm12162 | 0.0000 | No |
| 15446 | Gm12163 | 0.0000 | No |
| 15447 | Gm12164 | 0.0000 | No |
| 15448 | Gm12165 | 0.0000 | No |
| 15449 | Gm12166 | 0.0000 | No |
| 15450 | Gm12168 | 0.0000 | No |
| 15451 | Gm12169 | 0.0000 | No |
| 15452 | Gm12170 | 0.0000 | No |
| 15453 | Gm12171 | 0.0000 | No |



|       |         |        |    |
|-------|---------|--------|----|
| 15454 | Gm12173 | 0.0000 | No |
| 15455 | Gm12174 | 0.0000 | No |
| 15456 | Gm12175 | 0.0000 | No |
| 15457 | Gm12176 | 0.0000 | No |
| 15458 | Gm12178 | 0.0000 | No |
| 15459 | Gm12179 | 0.0000 | No |
| 15460 | Gm12180 | 0.0000 | No |
| 15461 | Gm12181 | 0.0000 | No |
| 15462 | Gm12182 | 0.0000 | No |
| 15463 | Gm12183 | 0.0000 | No |
| 15464 | Gm12184 | 0.0000 | No |
| 15465 | Gm12185 | 0.0000 | No |
| 15466 | Gm12186 | 0.0000 | No |
| 15467 | Gm12188 | 0.0000 | No |
| 15468 | Gm12189 | 0.0000 | No |
| 15469 | Gm12190 | 0.0000 | No |
| 15470 | Gm12191 | 0.0000 | No |
| 15471 | Gm12192 | 0.0000 | No |
| 15472 | Gm12193 | 0.0000 | No |
| 15473 | Gm12194 | 0.0000 | No |
| 15474 | Gm12195 | 0.0000 | No |
| 15475 | Gm12198 | 0.0000 | No |
| 15476 | Gm12199 | 0.0000 | No |
| 15477 | Gm12201 | 0.0000 | No |
| 15478 | Gm12202 | 0.0000 | No |
| 15479 | Gm12203 | 0.0000 | No |
| 15480 | Gm12204 | 0.0000 | No |
| 15481 | Gm12205 | 0.0000 | No |
| 15482 | Gm12206 | 0.0000 | No |
| 15483 | Gm12207 | 0.0000 | No |
| 15484 | Gm12208 | 0.0000 | No |
| 15485 | Gm12209 | 0.0000 | No |
| 15486 | Gm12210 | 0.0000 | No |
| 15487 | Gm12212 | 0.0000 | No |
| 15488 | Gm12213 | 0.0000 | No |
| 15489 | Gm12214 | 0.0000 | No |
| 15490 | Gm12216 | 0.0000 | No |
| 15491 | Gm12217 | 0.0000 | No |
| 15492 | Gm12218 | 0.0000 | No |
| 15493 | Gm12219 | 0.0000 | No |
| 15494 | Gm12220 | 0.0000 | No |
| 15495 | Gm12221 | 0.0000 | No |
| 15496 | Gm12224 | 0.0000 | No |
| 15497 | Gm12225 | 0.0000 | No |
| 15498 | Gm12227 | 0.0000 | No |
| 15499 | Gm12229 | 0.0000 | No |

|       |         |        |    |
|-------|---------|--------|----|
| 15500 | Gm12230 | 0.0000 | No |
| 15501 | Gm12231 | 0.0000 | No |
| 15502 | Gm12235 | 0.0000 | No |
| 15503 | Gm12236 | 0.0000 | No |
| 15504 | Gm12238 | 0.0000 | No |
| 15505 | Gm12239 | 0.0000 | No |
| 15506 | Gm12240 | 0.0000 | No |
| 15507 | Gm12241 | 0.0000 | No |
| 15508 | Gm12242 | 0.0000 | No |
| 15509 | Gm12243 | 0.0000 | No |
| 15510 | Gm12244 | 0.0000 | No |
| 15511 | Gm12246 | 0.0000 | No |
| 15512 | Gm12247 | 0.0000 | No |
| 15513 | Gm12248 | 0.0000 | No |
| 15514 | Gm12249 | 0.0000 | No |
| 15515 | Gm12250 | 0.0000 | No |
| 15516 | Gm12251 | 0.0000 | No |
| 15517 | Gm12252 | 0.0000 | No |
| 15518 | Gm12253 | 0.0000 | No |
| 15519 | Gm12254 | 0.0000 | No |
| 15520 | Gm12255 | 0.0000 | No |
| 15521 | Gm12256 | 0.0000 | No |
| 15522 | Gm12257 | 0.0000 | No |
| 15523 | Gm12258 | 0.0000 | No |
| 15524 | Gm12259 | 0.0000 | No |
| 15525 | Gm12260 | 0.0000 | No |
| 15526 | Gm12261 | 0.0000 | No |
| 15527 | Gm12263 | 0.0000 | No |
| 15528 | Gm12264 | 0.0000 | No |
| 15529 | Gm12265 | 0.0000 | No |
| 15530 | Gm12266 | 0.0000 | No |
| 15531 | Gm12267 | 0.0000 | No |
| 15532 | Gm12268 | 0.0000 | No |
| 15533 | Gm12269 | 0.0000 | No |
| 15534 | Gm12271 | 0.0000 | No |
| 15535 | Gm12273 | 0.0000 | No |
| 15536 | Gm12274 | 0.0000 | No |
| 15537 | Gm12275 | 0.0000 | No |
| 15538 | Gm12276 | 0.0000 | No |
| 15539 | Gm12278 | 0.0000 | No |
| 15540 | Gm12279 | 0.0000 | No |
| 15541 | Gm12280 | 0.0000 | No |
| 15542 | Gm12281 | 0.0000 | No |
| 15543 | Gm12285 | 0.0000 | No |
| 15544 | Gm12286 | 0.0000 | No |
| 15545 | Gm12287 | 0.0000 | No |

|       |         |        |    |
|-------|---------|--------|----|
| 15546 | Gm12288 | 0.0000 | No |
| 15547 | Gm12289 | 0.0000 | No |
| 15548 | Gm12290 | 0.0000 | No |
| 15549 | Gm12292 | 0.0000 | No |
| 15550 | Gm12293 | 0.0000 | No |
| 15551 | Gm12294 | 0.0000 | No |
| 15552 | Gm12295 | 0.0000 | No |
| 15553 | Gm12296 | 0.0000 | No |
| 15554 | Gm12297 | 0.0000 | No |
| 15555 | Gm12298 | 0.0000 | No |
| 15556 | Gm12299 | 0.0000 | No |
| 15557 | Gm12300 | 0.0000 | No |
| 15558 | Gm12301 | 0.0000 | No |
| 15559 | Gm12303 | 0.0000 | No |
| 15560 | Gm12304 | 0.0000 | No |
| 15561 | Gm12305 | 0.0000 | No |
| 15562 | Gm12306 | 0.0000 | No |
| 15563 | Gm12307 | 0.0000 | No |
| 15564 | Gm12308 | 0.0000 | No |
| 15565 | Gm12311 | 0.0000 | No |
| 15566 | Gm12312 | 0.0000 | No |
| 15567 | Gm12313 | 0.0000 | No |
| 15568 | Gm12314 | 0.0000 | No |
| 15569 | Gm12315 | 0.0000 | No |
| 15570 | Gm12316 | 0.0000 | No |
| 15571 | Gm12317 | 0.0000 | No |
| 15572 | Gm12318 | 0.0000 | No |
| 15573 | Gm12319 | 0.0000 | No |
| 15574 | Gm12320 | 0.0000 | No |
| 15575 | Gm12321 | 0.0000 | No |
| 15576 | Gm12322 | 0.0000 | No |
| 15577 | Gm12324 | 0.0000 | No |
| 15578 | Gm12325 | 0.0000 | No |
| 15579 | Gm12327 | 0.0000 | No |
| 15580 | Gm12328 | 0.0000 | No |
| 15581 | Gm12329 | 0.0000 | No |
| 15582 | Gm12332 | 0.0000 | No |
| 15583 | Gm12333 | 0.0000 | No |
| 15584 | Gm12335 | 0.0000 | No |
| 15585 | Gm12336 | 0.0000 | No |
| 15586 | Gm12337 | 0.0000 | No |
| 15587 | Gm12338 | 0.0000 | No |
| 15588 | Gm12339 | 0.0000 | No |
| 15589 | Gm12340 | 0.0000 | No |
| 15590 | Gm12341 | 0.0000 | No |
| 15591 | Gm12344 | 0.0000 | No |

|       |         |        |    |
|-------|---------|--------|----|
| 15592 | Gm12345 | 0.0000 | No |
| 15593 | Gm12346 | 0.0000 | No |
| 15594 | Gm12348 | 0.0000 | No |
| 15595 | Gm12350 | 0.0000 | No |
| 15596 | Gm12351 | 0.0000 | No |
| 15597 | Gm12352 | 0.0000 | No |
| 15598 | Gm12353 | 0.0000 | No |
| 15599 | Gm12354 | 0.0000 | No |
| 15600 | Gm12355 | 0.0000 | No |
| 15601 | Gm12356 | 0.0000 | No |
| 15602 | Gm12358 | 0.0000 | No |
| 15603 | Gm12359 | 0.0000 | No |
| 15604 | Gm12361 | 0.0000 | No |
| 15605 | Gm12362 | 0.0000 | No |
| 15606 | Gm12363 | 0.0000 | No |
| 15607 | Gm12364 | 0.0000 | No |
| 15608 | Gm12366 | 0.0000 | No |
| 15609 | Gm12367 | 0.0000 | No |
| 15610 | Gm12369 | 0.0000 | No |
| 15611 | Gm12370 | 0.0000 | No |
| 15612 | Gm12371 | 0.0000 | No |
| 15613 | Gm12372 | 0.0000 | No |
| 15614 | Gm12374 | 0.0000 | No |
| 15615 | Gm12375 | 0.0000 | No |
| 15616 | Gm12376 | 0.0000 | No |
| 15617 | Gm12378 | 0.0000 | No |
| 15618 | Gm12379 | 0.0000 | No |
| 15619 | Gm12380 | 0.0000 | No |
| 15620 | Gm12381 | 0.0000 | No |
| 15621 | Gm12382 | 0.0000 | No |
| 15622 | Gm12383 | 0.0000 | No |
| 15623 | Gm12386 | 0.0000 | No |
| 15624 | Gm12387 | 0.0000 | No |
| 15625 | Gm12388 | 0.0000 | No |
| 15626 | Gm12389 | 0.0000 | No |
| 15627 | Gm12390 | 0.0000 | No |
| 15628 | Gm12391 | 0.0000 | No |
| 15629 | Gm12392 | 0.0000 | No |
| 15630 | Gm12393 | 0.0000 | No |
| 15631 | Gm12394 | 0.0000 | No |
| 15632 | Gm12395 | 0.0000 | No |
| 15633 | Gm12396 | 0.0000 | No |
| 15634 | Gm12397 | 0.0000 | No |
| 15635 | Gm12399 | 0.0000 | No |
| 15636 | Gm12401 | 0.0000 | No |
| 15637 | Gm12402 | 0.0000 | No |

|       |         |        |    |
|-------|---------|--------|----|
| 15638 | Gm12403 | 0.0000 | No |
| 15639 | Gm12404 | 0.0000 | No |
| 15640 | Gm12405 | 0.0000 | No |
| 15641 | Gm12406 | 0.0000 | No |
| 15642 | Gm12407 | 0.0000 | No |
| 15643 | Gm12408 | 0.0000 | No |
| 15644 | Gm12409 | 0.0000 | No |
| 15645 | Gm12410 | 0.0000 | No |
| 15646 | Gm12411 | 0.0000 | No |
| 15647 | Gm12412 | 0.0000 | No |
| 15648 | Gm12413 | 0.0000 | No |
| 15649 | Gm12414 | 0.0000 | No |
| 15650 | Gm12415 | 0.0000 | No |
| 15651 | Gm12416 | 0.0000 | No |
| 15652 | Gm12417 | 0.0000 | No |
| 15653 | Gm12418 | 0.0000 | No |
| 15654 | Gm12419 | 0.0000 | No |
| 15655 | Gm12420 | 0.0000 | No |
| 15656 | Gm12421 | 0.0000 | No |
| 15657 | Gm12422 | 0.0000 | No |
| 15658 | Gm12423 | 0.0000 | No |
| 15659 | Gm12425 | 0.0000 | No |
| 15660 | Gm12426 | 0.0000 | No |
| 15661 | Gm12427 | 0.0000 | No |
| 15662 | Gm12428 | 0.0000 | No |
| 15663 | Gm12430 | 0.0000 | No |
| 15664 | Gm12432 | 0.0000 | No |
| 15665 | Gm12433 | 0.0000 | No |
| 15666 | Gm12434 | 0.0000 | No |
| 15667 | Gm12435 | 0.0000 | No |
| 15668 | Gm12438 | 0.0000 | No |
| 15669 | Gm12439 | 0.0000 | No |
| 15670 | Gm12440 | 0.0000 | No |
| 15671 | Gm12441 | 0.0000 | No |
| 15672 | Gm12442 | 0.0000 | No |
| 15673 | Gm12443 | 0.0000 | No |
| 15674 | Gm12445 | 0.0000 | No |
| 15675 | Gm12446 | 0.0000 | No |
| 15676 | Gm12447 | 0.0000 | No |
| 15677 | Gm12449 | 0.0000 | No |
| 15678 | Gm12451 | 0.0000 | No |
| 15679 | Gm12452 | 0.0000 | No |
| 15680 | Gm12453 | 0.0000 | No |
| 15681 | Gm12454 | 0.0000 | No |
| 15682 | Gm12455 | 0.0000 | No |
| 15683 | Gm12458 | 0.0000 | No |

|       |         |        |    |
|-------|---------|--------|----|
| 15684 | Gm12460 | 0.0000 | No |
| 15685 | Gm12461 | 0.0000 | No |
| 15686 | Gm12463 | 0.0000 | No |
| 15687 | Gm12464 | 0.0000 | No |
| 15688 | Gm12465 | 0.0000 | No |
| 15689 | Gm12466 | 0.0000 | No |
| 15690 | Gm12467 | 0.0000 | No |
| 15691 | Gm12468 | 0.0000 | No |
| 15692 | Gm12469 | 0.0000 | No |
| 15693 | Gm12470 | 0.0000 | No |
| 15694 | Gm12472 | 0.0000 | No |
| 15695 | Gm12473 | 0.0000 | No |
| 15696 | Gm12474 | 0.0000 | No |
| 15697 | Gm12477 | 0.0000 | No |
| 15698 | Gm12479 | 0.0000 | No |
| 15699 | Gm12480 | 0.0000 | No |
| 15700 | Gm12481 | 0.0000 | No |
| 15701 | Gm12482 | 0.0000 | No |
| 15702 | Gm12485 | 0.0000 | No |
| 15703 | Gm12486 | 0.0000 | No |
| 15704 | Gm12488 | 0.0000 | No |
| 15705 | Gm12489 | 0.0000 | No |
| 15706 | Gm12490 | 0.0000 | No |
| 15707 | Gm12492 | 0.0000 | No |
| 15708 | Gm12493 | 0.0000 | No |
| 15709 | Gm12494 | 0.0000 | No |
| 15710 | Gm12495 | 0.0000 | No |
| 15711 | Gm12496 | 0.0000 | No |
| 15712 | Gm12497 | 0.0000 | No |
| 15713 | Gm12498 | 0.0000 | No |
| 15714 | Gm12499 | 0.0000 | No |
| 15715 | Gm12500 | 0.0000 | No |
| 15716 | Gm12501 | 0.0000 | No |
| 15717 | Gm12502 | 0.0000 | No |
| 15718 | Gm12503 | 0.0000 | No |
| 15719 | Gm12504 | 0.0000 | No |
| 15720 | Gm12505 | 0.0000 | No |
| 15721 | Gm12506 | 0.0000 | No |
| 15722 | Gm12508 | 0.0000 | No |
| 15723 | Gm12509 | 0.0000 | No |
| 15724 | Gm12510 | 0.0000 | No |
| 15725 | Gm12511 | 0.0000 | No |
| 15726 | Gm12512 | 0.0000 | No |
| 15727 | Gm12513 | 0.0000 | No |
| 15728 | Gm12514 | 0.0000 | No |
| 15729 | Gm12515 | 0.0000 | No |

|       |         |        |    |
|-------|---------|--------|----|
| 15730 | Gm12516 | 0.0000 | No |
| 15731 | Gm12517 | 0.0000 | No |
| 15732 | Gm12518 | 0.0000 | No |
| 15733 | Gm12519 | 0.0000 | No |
| 15734 | Gm12520 | 0.0000 | No |
| 15735 | Gm12522 | 0.0000 | No |
| 15736 | Gm12523 | 0.0000 | No |
| 15737 | Gm12524 | 0.0000 | No |
| 15738 | Gm12525 | 0.0000 | No |
| 15739 | Gm12526 | 0.0000 | No |
| 15740 | Gm12527 | 0.0000 | No |
| 15741 | Gm12529 | 0.0000 | No |
| 15742 | Gm12531 | 0.0000 | No |
| 15743 | Gm12532 | 0.0000 | No |
| 15744 | Gm12534 | 0.0000 | No |
| 15745 | Gm12536 | 0.0000 | No |
| 15746 | Gm12537 | 0.0000 | No |
| 15747 | Gm12538 | 0.0000 | No |
| 15748 | Gm12539 | 0.0000 | No |
| 15749 | Gm12542 | 0.0000 | No |
| 15750 | Gm12543 | 0.0000 | No |
| 15751 | Gm12550 | 0.0000 | No |
| 15752 | Gm12551 | 0.0000 | No |
| 15753 | Gm12564 | 0.0000 | No |
| 15754 | Gm12565 | 0.0000 | No |
| 15755 | Gm12566 | 0.0000 | No |
| 15756 | Gm12568 | 0.0000 | No |
| 15757 | Gm12569 | 0.0000 | No |
| 15758 | Gm12570 | 0.0000 | No |
| 15759 | Gm12571 | 0.0000 | No |
| 15760 | Gm12573 | 0.0000 | No |
| 15761 | Gm12576 | 0.0000 | No |
| 15762 | Gm12577 | 0.0000 | No |
| 15763 | Gm12578 | 0.0000 | No |
| 15764 | Gm12579 | 0.0000 | No |
| 15765 | Gm12582 | 0.0000 | No |
| 15766 | Gm12583 | 0.0000 | No |
| 15767 | Gm12585 | 0.0000 | No |
| 15768 | Gm12586 | 0.0000 | No |
| 15769 | Gm12587 | 0.0000 | No |
| 15770 | Gm12589 | 0.0000 | No |
| 15771 | Gm12590 | 0.0000 | No |
| 15772 | Gm12591 | 0.0000 | No |
| 15773 | Gm12592 | 0.0000 | No |
| 15774 | Gm12593 | 0.0000 | No |
| 15775 | Gm12594 | 0.0000 | No |

|       |         |        |    |
|-------|---------|--------|----|
| 15776 | Gm12596 | 0.0000 | No |
| 15777 | Gm12598 | 0.0000 | No |
| 15778 | Gm12599 | 0.0000 | No |
| 15779 | Gm12600 | 0.0000 | No |
| 15780 | Gm12601 | 0.0000 | No |
| 15781 | Gm12602 | 0.0000 | No |
| 15782 | Gm12603 | 0.0000 | No |
| 15783 | Gm12606 | 0.0000 | No |
| 15784 | Gm12607 | 0.0000 | No |
| 15785 | Gm12608 | 0.0000 | No |
| 15786 | Gm12609 | 0.0000 | No |
| 15787 | Gm12610 | 0.0000 | No |
| 15788 | Gm12611 | 0.0000 | No |
| 15789 | Gm12612 | 0.0000 | No |
| 15790 | Gm12613 | 0.0000 | No |
| 15791 | Gm12614 | 0.0000 | No |
| 15792 | Gm12615 | 0.0000 | No |
| 15793 | Gm12616 | 0.0000 | No |
| 15794 | Gm12617 | 0.0000 | No |
| 15795 | Gm12618 | 0.0000 | No |
| 15796 | Gm12619 | 0.0000 | No |
| 15797 | Gm12620 | 0.0000 | No |
| 15798 | Gm12621 | 0.0000 | No |
| 15799 | Gm12622 | 0.0000 | No |
| 15800 | Gm12623 | 0.0000 | No |
| 15801 | Gm12624 | 0.0000 | No |
| 15802 | Gm12625 | 0.0000 | No |
| 15803 | Gm12626 | 0.0000 | No |
| 15804 | Gm12627 | 0.0000 | No |
| 15805 | Gm12628 | 0.0000 | No |
| 15806 | Gm12630 | 0.0000 | No |
| 15807 | Gm12631 | 0.0000 | No |
| 15808 | Gm12632 | 0.0000 | No |
| 15809 | Gm12633 | 0.0000 | No |
| 15810 | Gm12634 | 0.0000 | No |
| 15811 | Gm12636 | 0.0000 | No |
| 15812 | Gm12637 | 0.0000 | No |
| 15813 | Gm12638 | 0.0000 | No |
| 15814 | Gm12640 | 0.0000 | No |
| 15815 | Gm12641 | 0.0000 | No |
| 15816 | Gm12642 | 0.0000 | No |
| 15817 | Gm12643 | 0.0000 | No |
| 15818 | Gm12644 | 0.0000 | No |
| 15819 | Gm12645 | 0.0000 | No |
| 15820 | Gm12647 | 0.0000 | No |
| 15821 | Gm12648 | 0.0000 | No |



|       |         |        |    |
|-------|---------|--------|----|
| 15822 | Gm12649 | 0.0000 | No |
| 15823 | Gm12653 | 0.0000 | No |
| 15824 | Gm12654 | 0.0000 | No |
| 15825 | Gm12655 | 0.0000 | No |
| 15826 | Gm12657 | 0.0000 | No |
| 15827 | Gm12660 | 0.0000 | No |
| 15828 | Gm12661 | 0.0000 | No |
| 15829 | Gm12663 | 0.0000 | No |
| 15830 | Gm12664 | 0.0000 | No |
| 15831 | Gm12665 | 0.0000 | No |
| 15832 | Gm12666 | 0.0000 | No |
| 15833 | Gm12667 | 0.0000 | No |
| 15834 | Gm12668 | 0.0000 | No |
| 15835 | Gm12669 | 0.0000 | No |
| 15836 | Gm12670 | 0.0000 | No |
| 15837 | Gm12671 | 0.0000 | No |
| 15838 | Gm12676 | 0.0000 | No |
| 15839 | Gm12677 | 0.0000 | No |
| 15840 | Gm12678 | 0.0000 | No |
| 15841 | Gm12679 | 0.0000 | No |
| 15842 | Gm12681 | 0.0000 | No |
| 15843 | Gm12683 | 0.0000 | No |
| 15844 | Gm12684 | 0.0000 | No |
| 15845 | Gm12685 | 0.0000 | No |
| 15846 | Gm12686 | 0.0000 | No |
| 15847 | Gm12687 | 0.0000 | No |
| 15848 | Gm12688 | 0.0000 | No |
| 15849 | Gm12690 | 0.0000 | No |
| 15850 | Gm12692 | 0.0000 | No |
| 15851 | Gm12693 | 0.0000 | No |
| 15852 | Gm12694 | 0.0000 | No |
| 15853 | Gm12695 | 0.0000 | No |
| 15854 | Gm12696 | 0.0000 | No |
| 15855 | Gm12700 | 0.0000 | No |
| 15856 | Gm12701 | 0.0000 | No |
| 15857 | Gm12702 | 0.0000 | No |
| 15858 | Gm12703 | 0.0000 | No |
| 15859 | Gm12704 | 0.0000 | No |
| 15860 | Gm12705 | 0.0000 | No |
| 15861 | Gm12706 | 0.0000 | No |
| 15862 | Gm12707 | 0.0000 | No |
| 15863 | Gm12710 | 0.0000 | No |
| 15864 | Gm12712 | 0.0000 | No |
| 15865 | Gm12713 | 0.0000 | No |
| 15866 | Gm12715 | 0.0000 | No |
| 15867 | Gm12716 | 0.0000 | No |

|       |         |        |    |
|-------|---------|--------|----|
| 15868 | Gm12717 | 0.0000 | No |
| 15869 | Gm12718 | 0.0000 | No |
| 15870 | Gm12719 | 0.0000 | No |
| 15871 | Gm12720 | 0.0000 | No |
| 15872 | Gm12721 | 0.0000 | No |
| 15873 | Gm12722 | 0.0000 | No |
| 15874 | Gm12723 | 0.0000 | No |
| 15875 | Gm12724 | 0.0000 | No |
| 15876 | Gm12726 | 0.0000 | No |
| 15877 | Gm12727 | 0.0000 | No |
| 15878 | Gm12728 | 0.0000 | No |
| 15879 | Gm12729 | 0.0000 | No |
| 15880 | Gm12730 | 0.0000 | No |
| 15881 | Gm12731 | 0.0000 | No |
| 15882 | Gm12732 | 0.0000 | No |
| 15883 | Gm12733 | 0.0000 | No |
| 15884 | Gm12734 | 0.0000 | No |
| 15885 | Gm12735 | 0.0000 | No |
| 15886 | Gm12736 | 0.0000 | No |
| 15887 | Gm12737 | 0.0000 | No |
| 15888 | Gm12738 | 0.0000 | No |
| 15889 | Gm12740 | 0.0000 | No |
| 15890 | Gm12741 | 0.0000 | No |
| 15891 | Gm12742 | 0.0000 | No |
| 15892 | Gm12743 | 0.0000 | No |
| 15893 | Gm12744 | 0.0000 | No |
| 15894 | Gm12745 | 0.0000 | No |
| 15895 | Gm12746 | 0.0000 | No |
| 15896 | Gm12748 | 0.0000 | No |
| 15897 | Gm12749 | 0.0000 | No |
| 15898 | Gm12751 | 0.0000 | No |
| 15899 | Gm12752 | 0.0000 | No |
| 15900 | Gm12754 | 0.0000 | No |
| 15901 | Gm12755 | 0.0000 | No |
| 15902 | Gm12756 | 0.0000 | No |
| 15903 | Gm12757 | 0.0000 | No |
| 15904 | Gm12758 | 0.0000 | No |
| 15905 | Gm12760 | 0.0000 | No |
| 15906 | Gm12763 | 0.0000 | No |
| 15907 | Gm12764 | 0.0000 | No |
| 15908 | Gm12765 | 0.0000 | No |
| 15909 | Gm12766 | 0.0000 | No |
| 15910 | Gm12768 | 0.0000 | No |
| 15911 | Gm12770 | 0.0000 | No |
| 15912 | Gm12771 | 0.0000 | No |
| 15913 | Gm12773 | 0.0000 | No |

|       |         |        |    |
|-------|---------|--------|----|
| 15914 | Gm12774 | 0.0000 | No |
| 15915 | Gm12778 | 0.0000 | No |
| 15916 | Gm12779 | 0.0000 | No |
| 15917 | Gm12780 | 0.0000 | No |
| 15918 | Gm12781 | 0.0000 | No |
| 15919 | Gm12782 | 0.0000 | No |
| 15920 | Gm12783 | 0.0000 | No |
| 15921 | Gm12784 | 0.0000 | No |
| 15922 | Gm12785 | 0.0000 | No |
| 15923 | Gm12786 | 0.0000 | No |
| 15924 | Gm12787 | 0.0000 | No |
| 15925 | Gm12788 | 0.0000 | No |
| 15926 | Gm12790 | 0.0000 | No |
| 15927 | Gm12791 | 0.0000 | No |
| 15928 | Gm12792 | 0.0000 | No |
| 15929 | Gm12793 | 0.0000 | No |
| 15930 | Gm12794 | 0.0000 | No |
| 15931 | Gm12795 | 0.0000 | No |
| 15932 | Gm12796 | 0.0000 | No |
| 15933 | Gm12799 | 0.0000 | No |
| 15934 | Gm128   | 0.0000 | No |
| 15935 | Gm12800 | 0.0000 | No |
| 15936 | Gm12801 | 0.0000 | No |
| 15937 | Gm12802 | 0.0000 | No |
| 15938 | Gm12803 | 0.0000 | No |
| 15939 | Gm12804 | 0.0000 | No |
| 15940 | Gm12805 | 0.0000 | No |
| 15941 | Gm12806 | 0.0000 | No |
| 15942 | Gm12807 | 0.0000 | No |
| 15943 | Gm12808 | 0.0000 | No |
| 15944 | Gm12811 | 0.0000 | No |
| 15945 | Gm12813 | 0.0000 | No |
| 15946 | Gm12814 | 0.0000 | No |
| 15947 | Gm12815 | 0.0000 | No |
| 15948 | Gm12816 | 0.0000 | No |
| 15949 | Gm12818 | 0.0000 | No |
| 15950 | Gm12821 | 0.0000 | No |
| 15951 | Gm12823 | 0.0000 | No |
| 15952 | Gm12827 | 0.0000 | No |
| 15953 | Gm12828 | 0.0000 | No |
| 15954 | Gm12829 | 0.0000 | No |
| 15955 | Gm12834 | 0.0000 | No |
| 15956 | Gm12837 | 0.0000 | No |
| 15957 | Gm12838 | 0.0000 | No |
| 15958 | Gm12840 | 0.0000 | No |
| 15959 | Gm12841 | 0.0000 | No |

|       |         |        |    |
|-------|---------|--------|----|
| 15960 | Gm12842 | 0.0000 | No |
| 15961 | Gm12844 | 0.0000 | No |
| 15962 | Gm12846 | 0.0000 | No |
| 15963 | Gm12847 | 0.0000 | No |
| 15964 | Gm12848 | 0.0000 | No |
| 15965 | Gm12849 | 0.0000 | No |
| 15966 | Gm12850 | 0.0000 | No |
| 15967 | Gm12851 | 0.0000 | No |
| 15968 | Gm12852 | 0.0000 | No |
| 15969 | Gm12853 | 0.0000 | No |
| 15970 | Gm12854 | 0.0000 | No |
| 15971 | Gm12855 | 0.0000 | No |
| 15972 | Gm12856 | 0.0000 | No |
| 15973 | Gm12857 | 0.0000 | No |
| 15974 | Gm12858 | 0.0000 | No |
| 15975 | Gm12859 | 0.0000 | No |
| 15976 | Gm12860 | 0.0000 | No |
| 15977 | Gm12861 | 0.0000 | No |
| 15978 | Gm12865 | 0.0000 | No |
| 15979 | Gm12866 | 0.0000 | No |
| 15980 | Gm12867 | 0.0000 | No |
| 15981 | Gm12868 | 0.0000 | No |
| 15982 | Gm12870 | 0.0000 | No |
| 15983 | Gm12871 | 0.0000 | No |
| 15984 | Gm12872 | 0.0000 | No |
| 15985 | Gm12873 | 0.0000 | No |
| 15986 | Gm12874 | 0.0000 | No |
| 15987 | Gm12876 | 0.0000 | No |
| 15988 | Gm12877 | 0.0000 | No |
| 15989 | Gm12878 | 0.0000 | No |
| 15990 | Gm12879 | 0.0000 | No |
| 15991 | Gm12880 | 0.0000 | No |
| 15992 | Gm12881 | 0.0000 | No |
| 15993 | Gm12882 | 0.0000 | No |
| 15994 | Gm12883 | 0.0000 | No |
| 15995 | Gm12884 | 0.0000 | No |
| 15996 | Gm12885 | 0.0000 | No |
| 15997 | Gm12887 | 0.0000 | No |
| 15998 | Gm12888 | 0.0000 | No |
| 15999 | Gm12889 | 0.0000 | No |
| 16000 | Gm12890 | 0.0000 | No |
| 16001 | Gm12891 | 0.0000 | No |
| 16002 | Gm12892 | 0.0000 | No |
| 16003 | Gm12893 | 0.0000 | No |
| 16004 | Gm12895 | 0.0000 | No |
| 16005 | Gm12896 | 0.0000 | No |

|       |         |        |    |
|-------|---------|--------|----|
| 16006 | Gm12897 | 0.0000 | No |
| 16007 | Gm12898 | 0.0000 | No |
| 16008 | Gm12899 | 0.0000 | No |
| 16009 | Gm12900 | 0.0000 | No |
| 16010 | Gm12901 | 0.0000 | No |
| 16011 | Gm12902 | 0.0000 | No |
| 16012 | Gm12903 | 0.0000 | No |
| 16013 | Gm12905 | 0.0000 | No |
| 16014 | Gm12906 | 0.0000 | No |
| 16015 | Gm12907 | 0.0000 | No |
| 16016 | Gm12909 | 0.0000 | No |
| 16017 | Gm12910 | 0.0000 | No |
| 16018 | Gm12911 | 0.0000 | No |
| 16019 | Gm12912 | 0.0000 | No |
| 16020 | Gm12914 | 0.0000 | No |
| 16021 | Gm12915 | 0.0000 | No |
| 16022 | Gm12916 | 0.0000 | No |
| 16023 | Gm12917 | 0.0000 | No |
| 16024 | Gm12918 | 0.0000 | No |
| 16025 | Gm12919 | 0.0000 | No |
| 16026 | Gm12920 | 0.0000 | No |
| 16027 | Gm12922 | 0.0000 | No |
| 16028 | Gm12923 | 0.0000 | No |
| 16029 | Gm12924 | 0.0000 | No |
| 16030 | Gm12925 | 0.0000 | No |
| 16031 | Gm12926 | 0.0000 | No |
| 16032 | Gm12928 | 0.0000 | No |
| 16033 | Gm12929 | 0.0000 | No |
| 16034 | Gm12930 | 0.0000 | No |
| 16035 | Gm12931 | 0.0000 | No |
| 16036 | Gm12932 | 0.0000 | No |
| 16037 | Gm12933 | 0.0000 | No |
| 16038 | Gm12935 | 0.0000 | No |
| 16039 | Gm12937 | 0.0000 | No |
| 16040 | Gm12939 | 0.0000 | No |
| 16041 | Gm12940 | 0.0000 | No |
| 16042 | Gm12941 | 0.0000 | No |
| 16043 | Gm12944 | 0.0000 | No |
| 16044 | Gm12945 | 0.0000 | No |
| 16045 | Gm12947 | 0.0000 | No |
| 16046 | Gm12948 | 0.0000 | No |
| 16047 | Gm12950 | 0.0000 | No |
| 16048 | Gm12953 | 0.0000 | No |
| 16049 | Gm12954 | 0.0000 | No |
| 16050 | Gm12955 | 0.0000 | No |
| 16051 | Gm12956 | 0.0000 | No |

|       |         |        |    |
|-------|---------|--------|----|
| 16052 | Gm12957 | 0.0000 | No |
| 16053 | Gm12958 | 0.0000 | No |
| 16054 | Gm12959 | 0.0000 | No |
| 16055 | Gm12960 | 0.0000 | No |
| 16056 | Gm12961 | 0.0000 | No |
| 16057 | Gm12962 | 0.0000 | No |
| 16058 | Gm12963 | 0.0000 | No |
| 16059 | Gm12966 | 0.0000 | No |
| 16060 | Gm12968 | 0.0000 | No |
| 16061 | Gm12969 | 0.0000 | No |
| 16062 | Gm12970 | 0.0000 | No |
| 16063 | Gm12971 | 0.0000 | No |
| 16064 | Gm12973 | 0.0000 | No |
| 16065 | Gm12976 | 0.0000 | No |
| 16066 | Gm12977 | 0.0000 | No |
| 16067 | Gm12978 | 0.0000 | No |
| 16068 | Gm12980 | 0.0000 | No |
| 16069 | Gm12981 | 0.0000 | No |
| 16070 | Gm12982 | 0.0000 | No |
| 16071 | Gm12983 | 0.0000 | No |
| 16072 | Gm12984 | 0.0000 | No |
| 16073 | Gm12985 | 0.0000 | No |
| 16074 | Gm12986 | 0.0000 | No |
| 16075 | Gm12987 | 0.0000 | No |
| 16076 | Gm12988 | 0.0000 | No |
| 16077 | Gm12989 | 0.0000 | No |
| 16078 | Gm12990 | 0.0000 | No |
| 16079 | Gm12991 | 0.0000 | No |
| 16080 | Gm12992 | 0.0000 | No |
| 16081 | Gm12994 | 0.0000 | No |
| 16082 | Gm12996 | 0.0000 | No |
| 16083 | Gm12997 | 0.0000 | No |
| 16084 | Gm12998 | 0.0000 | No |
| 16085 | Gm12999 | 0.0000 | No |
| 16086 | Gm13000 | 0.0000 | No |
| 16087 | Gm13001 | 0.0000 | No |
| 16088 | Gm13002 | 0.0000 | No |
| 16089 | Gm13003 | 0.0000 | No |
| 16090 | Gm13005 | 0.0000 | No |
| 16091 | Gm13006 | 0.0000 | No |
| 16092 | Gm13007 | 0.0000 | No |
| 16093 | Gm13008 | 0.0000 | No |
| 16094 | Gm13009 | 0.0000 | No |
| 16095 | Gm13010 | 0.0000 | No |
| 16096 | Gm13012 | 0.0000 | No |
| 16097 | Gm13013 | 0.0000 | No |

|       |         |        |    |
|-------|---------|--------|----|
| 16098 | Gm13015 | 0.0000 | No |
| 16099 | Gm13017 | 0.0000 | No |
| 16100 | Gm13019 | 0.0000 | No |
| 16101 | Gm13021 | 0.0000 | No |
| 16102 | Gm13022 | 0.0000 | No |
| 16103 | Gm13023 | 0.0000 | No |
| 16104 | Gm13024 | 0.0000 | No |
| 16105 | Gm13025 | 0.0000 | No |
| 16106 | Gm13026 | 0.0000 | No |
| 16107 | Gm13027 | 0.0000 | No |
| 16108 | Gm13028 | 0.0000 | No |
| 16109 | Gm13030 | 0.0000 | No |
| 16110 | Gm13031 | 0.0000 | No |
| 16111 | Gm13033 | 0.0000 | No |
| 16112 | Gm13034 | 0.0000 | No |
| 16113 | Gm13036 | 0.0000 | No |
| 16114 | Gm13038 | 0.0000 | No |
| 16115 | Gm13039 | 0.0000 | No |
| 16116 | Gm13040 | 0.0000 | No |
| 16117 | Gm13041 | 0.0000 | No |
| 16118 | Gm13042 | 0.0000 | No |
| 16119 | Gm13043 | 0.0000 | No |
| 16120 | Gm13045 | 0.0000 | No |
| 16121 | Gm13046 | 0.0000 | No |
| 16122 | Gm13047 | 0.0000 | No |
| 16123 | Gm13049 | 0.0000 | No |
| 16124 | Gm1305  | 0.0000 | No |
| 16125 | Gm13050 | 0.0000 | No |
| 16126 | Gm13054 | 0.0000 | No |
| 16127 | Gm13056 | 0.0000 | No |
| 16128 | Gm13057 | 0.0000 | No |
| 16129 | Gm13058 | 0.0000 | No |
| 16130 | Gm13059 | 0.0000 | No |
| 16131 | Gm13061 | 0.0000 | No |
| 16132 | Gm13063 | 0.0000 | No |
| 16133 | Gm13064 | 0.0000 | No |
| 16134 | Gm13065 | 0.0000 | No |
| 16135 | Gm13066 | 0.0000 | No |
| 16136 | Gm13067 | 0.0000 | No |
| 16137 | Gm13068 | 0.0000 | No |
| 16138 | Gm13071 | 0.0000 | No |
| 16139 | Gm13073 | 0.0000 | No |
| 16140 | Gm13074 | 0.0000 | No |
| 16141 | Gm13075 | 0.0000 | No |
| 16142 | Gm13076 | 0.0000 | No |
| 16143 | Gm13077 | 0.0000 | No |

|       |         |        |    |
|-------|---------|--------|----|
| 16144 | Gm13078 | 0.0000 | No |
| 16145 | Gm13080 | 0.0000 | No |
| 16146 | Gm13081 | 0.0000 | No |
| 16147 | Gm13082 | 0.0000 | No |
| 16148 | Gm13083 | 0.0000 | No |
| 16149 | Gm13084 | 0.0000 | No |
| 16150 | Gm13085 | 0.0000 | No |
| 16151 | Gm13087 | 0.0000 | No |
| 16152 | Gm13089 | 0.0000 | No |
| 16153 | Gm13090 | 0.0000 | No |
| 16154 | Gm13091 | 0.0000 | No |
| 16155 | Gm13093 | 0.0000 | No |
| 16156 | Gm13094 | 0.0000 | No |
| 16157 | Gm13096 | 0.0000 | No |
| 16158 | Gm13097 | 0.0000 | No |
| 16159 | Gm13100 | 0.0000 | No |
| 16160 | Gm13101 | 0.0000 | No |
| 16161 | Gm13102 | 0.0000 | No |
| 16162 | Gm13103 | 0.0000 | No |
| 16163 | Gm13106 | 0.0000 | No |
| 16164 | Gm13112 | 0.0000 | No |
| 16165 | Gm13114 | 0.0000 | No |
| 16166 | Gm13115 | 0.0000 | No |
| 16167 | Gm13117 | 0.0000 | No |
| 16168 | Gm13118 | 0.0000 | No |
| 16169 | Gm13120 | 0.0000 | No |
| 16170 | Gm13121 | 0.0000 | No |
| 16171 | Gm13122 | 0.0000 | No |
| 16172 | Gm13123 | 0.0000 | No |
| 16173 | Gm13124 | 0.0000 | No |
| 16174 | Gm13125 | 0.0000 | No |
| 16175 | Gm13126 | 0.0000 | No |
| 16176 | Gm13127 | 0.0000 | No |
| 16177 | Gm13128 | 0.0000 | No |
| 16178 | Gm13130 | 0.0000 | No |
| 16179 | Gm13131 | 0.0000 | No |
| 16180 | Gm13132 | 0.0000 | No |
| 16181 | Gm13133 | 0.0000 | No |
| 16182 | Gm13134 | 0.0000 | No |
| 16183 | Gm13135 | 0.0000 | No |
| 16184 | Gm13136 | 0.0000 | No |
| 16185 | Gm13140 | 0.0000 | No |
| 16186 | Gm13141 | 0.0000 | No |
| 16187 | Gm13142 | 0.0000 | No |
| 16188 | Gm13144 | 0.0000 | No |
| 16189 | Gm13146 | 0.0000 | No |



|       |         |        |    |
|-------|---------|--------|----|
| 16190 | Gm13147 | 0.0000 | No |
| 16191 | Gm13148 | 0.0000 | No |
| 16192 | Gm13149 | 0.0000 | No |
| 16193 | Gm13153 | 0.0000 | No |
| 16194 | Gm13155 | 0.0000 | No |
| 16195 | Gm13156 | 0.0000 | No |
| 16196 | Gm13158 | 0.0000 | No |
| 16197 | Gm13160 | 0.0000 | No |
| 16198 | Gm13161 | 0.0000 | No |
| 16199 | Gm13162 | 0.0000 | No |
| 16200 | Gm13166 | 0.0000 | No |
| 16201 | Gm13167 | 0.0000 | No |
| 16202 | Gm13169 | 0.0000 | No |
| 16203 | Gm13170 | 0.0000 | No |
| 16204 | Gm13171 | 0.0000 | No |
| 16205 | Gm13172 | 0.0000 | No |
| 16206 | Gm13173 | 0.0000 | No |
| 16207 | Gm13174 | 0.0000 | No |
| 16208 | Gm13175 | 0.0000 | No |
| 16209 | Gm13176 | 0.0000 | No |
| 16210 | Gm13177 | 0.0000 | No |
| 16211 | Gm13178 | 0.0000 | No |
| 16212 | Gm13179 | 0.0000 | No |
| 16213 | Gm13182 | 0.0000 | No |
| 16214 | Gm13184 | 0.0000 | No |
| 16215 | Gm13185 | 0.0000 | No |
| 16216 | Gm13186 | 0.0000 | No |
| 16217 | Gm13188 | 0.0000 | No |
| 16218 | Gm13189 | 0.0000 | No |
| 16219 | Gm13191 | 0.0000 | No |
| 16220 | Gm13192 | 0.0000 | No |
| 16221 | Gm13193 | 0.0000 | No |
| 16222 | Gm13194 | 0.0000 | No |
| 16223 | Gm13196 | 0.0000 | No |
| 16224 | Gm13197 | 0.0000 | No |
| 16225 | Gm13198 | 0.0000 | No |
| 16226 | Gm13199 | 0.0000 | No |
| 16227 | Gm13200 | 0.0000 | No |
| 16228 | Gm13201 | 0.0000 | No |
| 16229 | Gm13202 | 0.0000 | No |
| 16230 | Gm13203 | 0.0000 | No |
| 16231 | Gm13204 | 0.0000 | No |
| 16232 | Gm13205 | 0.0000 | No |
| 16233 | Gm13206 | 0.0000 | No |
| 16234 | Gm13207 | 0.0000 | No |
| 16235 | Gm13209 | 0.0000 | No |

|       |         |        |    |
|-------|---------|--------|----|
| 16236 | Gm13211 | 0.0000 | No |
| 16237 | Gm13212 | 0.0000 | No |
| 16238 | Gm13213 | 0.0000 | No |
| 16239 | Gm13214 | 0.0000 | No |
| 16240 | Gm13215 | 0.0000 | No |
| 16241 | Gm13216 | 0.0000 | No |
| 16242 | Gm13217 | 0.0000 | No |
| 16243 | Gm13218 | 0.0000 | No |
| 16244 | Gm13219 | 0.0000 | No |
| 16245 | Gm13220 | 0.0000 | No |
| 16246 | Gm13221 | 0.0000 | No |
| 16247 | Gm13222 | 0.0000 | No |
| 16248 | Gm13223 | 0.0000 | No |
| 16249 | Gm13224 | 0.0000 | No |
| 16250 | Gm13226 | 0.0000 | No |
| 16251 | Gm13228 | 0.0000 | No |
| 16252 | Gm13229 | 0.0000 | No |
| 16253 | Gm13230 | 0.0000 | No |
| 16254 | Gm13232 | 0.0000 | No |
| 16255 | Gm13233 | 0.0000 | No |
| 16256 | Gm13234 | 0.0000 | No |
| 16257 | Gm13236 | 0.0000 | No |
| 16258 | Gm13237 | 0.0000 | No |
| 16259 | Gm13238 | 0.0000 | No |
| 16260 | Gm13239 | 0.0000 | No |
| 16261 | Gm13240 | 0.0000 | No |
| 16262 | Gm13241 | 0.0000 | No |
| 16263 | Gm13243 | 0.0000 | No |
| 16264 | Gm13244 | 0.0000 | No |
| 16265 | Gm13245 | 0.0000 | No |
| 16266 | Gm13246 | 0.0000 | No |
| 16267 | Gm13249 | 0.0000 | No |
| 16268 | Gm13250 | 0.0000 | No |
| 16269 | Gm13252 | 0.0000 | No |
| 16270 | Gm13255 | 0.0000 | No |
| 16271 | Gm13257 | 0.0000 | No |
| 16272 | Gm13260 | 0.0000 | No |
| 16273 | Gm13262 | 0.0000 | No |
| 16274 | Gm13263 | 0.0000 | No |
| 16275 | Gm13264 | 0.0000 | No |
| 16276 | Gm13265 | 0.0000 | No |
| 16277 | Gm13266 | 0.0000 | No |
| 16278 | Gm13267 | 0.0000 | No |
| 16279 | Gm13268 | 0.0000 | No |
| 16280 | Gm13270 | 0.0000 | No |
| 16281 | Gm13272 | 0.0000 | No |

|       |         |        |    |
|-------|---------|--------|----|
| 16282 | Gm13274 | 0.0000 | No |
| 16283 | Gm13275 | 0.0000 | No |
| 16284 | Gm13276 | 0.0000 | No |
| 16285 | Gm13277 | 0.0000 | No |
| 16286 | Gm13278 | 0.0000 | No |
| 16287 | Gm13279 | 0.0000 | No |
| 16288 | Gm13281 | 0.0000 | No |
| 16289 | Gm13282 | 0.0000 | No |
| 16290 | Gm13283 | 0.0000 | No |
| 16291 | Gm13284 | 0.0000 | No |
| 16292 | Gm13285 | 0.0000 | No |
| 16293 | Gm13286 | 0.0000 | No |
| 16294 | Gm13287 | 0.0000 | No |
| 16295 | Gm13288 | 0.0000 | No |
| 16296 | Gm13289 | 0.0000 | No |
| 16297 | Gm13290 | 0.0000 | No |
| 16298 | Gm13291 | 0.0000 | No |
| 16299 | Gm13292 | 0.0000 | No |
| 16300 | Gm13294 | 0.0000 | No |
| 16301 | Gm13296 | 0.0000 | No |
| 16302 | Gm13297 | 0.0000 | No |
| 16303 | Gm13299 | 0.0000 | No |
| 16304 | Gm1330  | 0.0000 | No |
| 16305 | Gm13301 | 0.0000 | No |
| 16306 | Gm13302 | 0.0000 | No |
| 16307 | Gm13303 | 0.0000 | No |
| 16308 | Gm13304 | 0.0000 | No |
| 16309 | Gm13305 | 0.0000 | No |
| 16310 | Gm13306 | 0.0000 | No |
| 16311 | Gm13307 | 0.0000 | No |
| 16312 | Gm13311 | 0.0000 | No |
| 16313 | Gm13312 | 0.0000 | No |
| 16314 | Gm13314 | 0.0000 | No |
| 16315 | Gm13315 | 0.0000 | No |
| 16316 | Gm13316 | 0.0000 | No |
| 16317 | Gm13320 | 0.0000 | No |
| 16318 | Gm13321 | 0.0000 | No |
| 16319 | Gm13322 | 0.0000 | No |
| 16320 | Gm13323 | 0.0000 | No |
| 16321 | Gm13324 | 0.0000 | No |
| 16322 | Gm13325 | 0.0000 | No |
| 16323 | Gm13326 | 0.0000 | No |
| 16324 | Gm13327 | 0.0000 | No |
| 16325 | Gm13328 | 0.0000 | No |
| 16326 | Gm13329 | 0.0000 | No |
| 16327 | Gm13330 | 0.0000 | No |

|       |         |        |    |
|-------|---------|--------|----|
| 16328 | Gm13331 | 0.0000 | No |
| 16329 | Gm13332 | 0.0000 | No |
| 16330 | Gm13333 | 0.0000 | No |
| 16331 | Gm13335 | 0.0000 | No |
| 16332 | Gm13337 | 0.0000 | No |
| 16333 | Gm13338 | 0.0000 | No |
| 16334 | Gm13339 | 0.0000 | No |
| 16335 | Gm13340 | 0.0000 | No |
| 16336 | Gm13341 | 0.0000 | No |
| 16337 | Gm13342 | 0.0000 | No |
| 16338 | Gm13343 | 0.0000 | No |
| 16339 | Gm13344 | 0.0000 | No |
| 16340 | Gm13345 | 0.0000 | No |
| 16341 | Gm13346 | 0.0000 | No |
| 16342 | Gm13347 | 0.0000 | No |
| 16343 | Gm13348 | 0.0000 | No |
| 16344 | Gm13349 | 0.0000 | No |
| 16345 | Gm1335  | 0.0000 | No |
| 16346 | Gm13350 | 0.0000 | No |
| 16347 | Gm13351 | 0.0000 | No |
| 16348 | Gm13353 | 0.0000 | No |
| 16349 | Gm13355 | 0.0000 | No |
| 16350 | Gm13356 | 0.0000 | No |
| 16351 | Gm13357 | 0.0000 | No |
| 16352 | Gm13358 | 0.0000 | No |
| 16353 | Gm13359 | 0.0000 | No |
| 16354 | Gm13360 | 0.0000 | No |
| 16355 | Gm13361 | 0.0000 | No |
| 16356 | Gm13363 | 0.0000 | No |
| 16357 | Gm13365 | 0.0000 | No |
| 16358 | Gm13366 | 0.0000 | No |
| 16359 | Gm13367 | 0.0000 | No |
| 16360 | Gm13368 | 0.0000 | No |
| 16361 | Gm13369 | 0.0000 | No |
| 16362 | Gm13370 | 0.0000 | No |
| 16363 | Gm13371 | 0.0000 | No |
| 16364 | Gm13373 | 0.0000 | No |
| 16365 | Gm13375 | 0.0000 | No |
| 16366 | Gm13376 | 0.0000 | No |
| 16367 | Gm13377 | 0.0000 | No |
| 16368 | Gm13378 | 0.0000 | No |
| 16369 | Gm13379 | 0.0000 | No |
| 16370 | Gm13381 | 0.0000 | No |
| 16371 | Gm13384 | 0.0000 | No |
| 16372 | Gm13385 | 0.0000 | No |
| 16373 | Gm13386 | 0.0000 | No |

|       |         |        |    |
|-------|---------|--------|----|
| 16374 | Gm13387 | 0.0000 | No |
| 16375 | Gm13389 | 0.0000 | No |
| 16376 | Gm13391 | 0.0000 | No |
| 16377 | Gm13392 | 0.0000 | No |
| 16378 | Gm13393 | 0.0000 | No |
| 16379 | Gm13394 | 0.0000 | No |
| 16380 | Gm13396 | 0.0000 | No |
| 16381 | Gm13397 | 0.0000 | No |
| 16382 | Gm13398 | 0.0000 | No |
| 16383 | Gm13400 | 0.0000 | No |
| 16384 | Gm13401 | 0.0000 | No |
| 16385 | Gm13402 | 0.0000 | No |
| 16386 | Gm13403 | 0.0000 | No |
| 16387 | Gm13404 | 0.0000 | No |
| 16388 | Gm13405 | 0.0000 | No |
| 16389 | Gm13406 | 0.0000 | No |
| 16390 | Gm13407 | 0.0000 | No |
| 16391 | Gm13408 | 0.0000 | No |
| 16392 | Gm13409 | 0.0000 | No |
| 16393 | Gm13410 | 0.0000 | No |
| 16394 | Gm13413 | 0.0000 | No |
| 16395 | Gm13415 | 0.0000 | No |
| 16396 | Gm13416 | 0.0000 | No |
| 16397 | Gm13417 | 0.0000 | No |
| 16398 | Gm13418 | 0.0000 | No |
| 16399 | Gm13419 | 0.0000 | No |
| 16400 | Gm13420 | 0.0000 | No |
| 16401 | Gm13421 | 0.0000 | No |
| 16402 | Gm13422 | 0.0000 | No |
| 16403 | Gm13423 | 0.0000 | No |
| 16404 | Gm13424 | 0.0000 | No |
| 16405 | Gm13427 | 0.0000 | No |
| 16406 | Gm13428 | 0.0000 | No |
| 16407 | Gm13429 | 0.0000 | No |
| 16408 | Gm13430 | 0.0000 | No |
| 16409 | Gm13431 | 0.0000 | No |
| 16410 | Gm13432 | 0.0000 | No |
| 16411 | Gm13433 | 0.0000 | No |
| 16412 | Gm13434 | 0.0000 | No |
| 16413 | Gm13435 | 0.0000 | No |
| 16414 | Gm13436 | 0.0000 | No |
| 16415 | Gm13437 | 0.0000 | No |
| 16416 | Gm13438 | 0.0000 | No |
| 16417 | Gm13440 | 0.0000 | No |
| 16418 | Gm13441 | 0.0000 | No |
| 16419 | Gm13442 | 0.0000 | No |

|       |         |        |    |
|-------|---------|--------|----|
| 16420 | Gm13443 | 0.0000 | No |
| 16421 | Gm13444 | 0.0000 | No |
| 16422 | Gm13445 | 0.0000 | No |
| 16423 | Gm13446 | 0.0000 | No |
| 16424 | Gm13448 | 0.0000 | No |
| 16425 | Gm13449 | 0.0000 | No |
| 16426 | Gm13450 | 0.0000 | No |
| 16427 | Gm13451 | 0.0000 | No |
| 16428 | Gm13453 | 0.0000 | No |
| 16429 | Gm13454 | 0.0000 | No |
| 16430 | Gm13456 | 0.0000 | No |
| 16431 | Gm13457 | 0.0000 | No |
| 16432 | Gm13458 | 0.0000 | No |
| 16433 | Gm13459 | 0.0000 | No |
| 16434 | Gm13460 | 0.0000 | No |
| 16435 | Gm13461 | 0.0000 | No |
| 16436 | Gm13462 | 0.0000 | No |
| 16437 | Gm13463 | 0.0000 | No |
| 16438 | Gm13464 | 0.0000 | No |
| 16439 | Gm13465 | 0.0000 | No |
| 16440 | Gm13466 | 0.0000 | No |
| 16441 | Gm13467 | 0.0000 | No |
| 16442 | Gm13470 | 0.0000 | No |
| 16443 | Gm13471 | 0.0000 | No |
| 16444 | Gm13472 | 0.0000 | No |
| 16445 | Gm13473 | 0.0000 | No |
| 16446 | Gm13474 | 0.0000 | No |
| 16447 | Gm13475 | 0.0000 | No |
| 16448 | Gm13477 | 0.0000 | No |
| 16449 | Gm13478 | 0.0000 | No |
| 16450 | Gm13479 | 0.0000 | No |
| 16451 | Gm13481 | 0.0000 | No |
| 16452 | Gm13482 | 0.0000 | No |
| 16453 | Gm13484 | 0.0000 | No |
| 16454 | Gm13485 | 0.0000 | No |
| 16455 | Gm13486 | 0.0000 | No |
| 16456 | Gm13487 | 0.0000 | No |
| 16457 | Gm13488 | 0.0000 | No |
| 16458 | Gm13489 | 0.0000 | No |
| 16459 | Gm13491 | 0.0000 | No |
| 16460 | Gm13492 | 0.0000 | No |
| 16461 | Gm13493 | 0.0000 | No |
| 16462 | Gm13494 | 0.0000 | No |
| 16463 | Gm13496 | 0.0000 | No |
| 16464 | Gm13497 | 0.0000 | No |
| 16465 | Gm13498 | 0.0000 | No |

|       |         |        |    |
|-------|---------|--------|----|
| 16466 | Gm13499 | 0.0000 | No |
| 16467 | Gm13500 | 0.0000 | No |
| 16468 | Gm13501 | 0.0000 | No |
| 16469 | Gm13502 | 0.0000 | No |
| 16470 | Gm13503 | 0.0000 | No |
| 16471 | Gm13504 | 0.0000 | No |
| 16472 | Gm13505 | 0.0000 | No |
| 16473 | Gm13508 | 0.0000 | No |
| 16474 | Gm13509 | 0.0000 | No |
| 16475 | Gm13510 | 0.0000 | No |
| 16476 | Gm13511 | 0.0000 | No |
| 16477 | Gm13517 | 0.0000 | No |
| 16478 | Gm13518 | 0.0000 | No |
| 16479 | Gm13521 | 0.0000 | No |
| 16480 | Gm13522 | 0.0000 | No |
| 16481 | Gm13523 | 0.0000 | No |
| 16482 | Gm13524 | 0.0000 | No |
| 16483 | Gm13525 | 0.0000 | No |
| 16484 | Gm13528 | 0.0000 | No |
| 16485 | Gm13529 | 0.0000 | No |
| 16486 | Gm13530 | 0.0000 | No |
| 16487 | Gm13531 | 0.0000 | No |
| 16488 | Gm13532 | 0.0000 | No |
| 16489 | Gm13533 | 0.0000 | No |
| 16490 | Gm13535 | 0.0000 | No |
| 16491 | Gm13536 | 0.0000 | No |
| 16492 | Gm13537 | 0.0000 | No |
| 16493 | Gm13538 | 0.0000 | No |
| 16494 | Gm13539 | 0.0000 | No |
| 16495 | Gm13542 | 0.0000 | No |
| 16496 | Gm13543 | 0.0000 | No |
| 16497 | Gm13545 | 0.0000 | No |
| 16498 | Gm13546 | 0.0000 | No |
| 16499 | Gm13547 | 0.0000 | No |
| 16500 | Gm13548 | 0.0000 | No |
| 16501 | Gm13549 | 0.0000 | No |
| 16502 | Gm13550 | 0.0000 | No |
| 16503 | Gm13551 | 0.0000 | No |
| 16504 | Gm13552 | 0.0000 | No |
| 16505 | Gm13553 | 0.0000 | No |
| 16506 | Gm13554 | 0.0000 | No |
| 16507 | Gm13555 | 0.0000 | No |
| 16508 | Gm13556 | 0.0000 | No |
| 16509 | Gm13557 | 0.0000 | No |
| 16510 | Gm13558 | 0.0000 | No |
| 16511 | Gm13559 | 0.0000 | No |

|       |         |        |    |
|-------|---------|--------|----|
| 16512 | Gm13561 | 0.0000 | No |
| 16513 | Gm13562 | 0.0000 | No |
| 16514 | Gm13563 | 0.0000 | No |
| 16515 | Gm13564 | 0.0000 | No |
| 16516 | Gm13565 | 0.0000 | No |
| 16517 | Gm13566 | 0.0000 | No |
| 16518 | Gm13567 | 0.0000 | No |
| 16519 | Gm13568 | 0.0000 | No |
| 16520 | Gm13569 | 0.0000 | No |
| 16521 | Gm13570 | 0.0000 | No |
| 16522 | Gm13571 | 0.0000 | No |
| 16523 | Gm13572 | 0.0000 | No |
| 16524 | Gm13573 | 0.0000 | No |
| 16525 | Gm13574 | 0.0000 | No |
| 16526 | Gm13575 | 0.0000 | No |
| 16527 | Gm13576 | 0.0000 | No |
| 16528 | Gm13578 | 0.0000 | No |
| 16529 | Gm13580 | 0.0000 | No |
| 16530 | Gm13581 | 0.0000 | No |
| 16531 | Gm13582 | 0.0000 | No |
| 16532 | Gm13583 | 0.0000 | No |
| 16533 | Gm13584 | 0.0000 | No |
| 16534 | Gm13586 | 0.0000 | No |
| 16535 | Gm13587 | 0.0000 | No |
| 16536 | Gm13588 | 0.0000 | No |
| 16537 | Gm13589 | 0.0000 | No |
| 16538 | Gm13590 | 0.0000 | No |
| 16539 | Gm13592 | 0.0000 | No |
| 16540 | Gm13593 | 0.0000 | No |
| 16541 | Gm13594 | 0.0000 | No |
| 16542 | Gm13595 | 0.0000 | No |
| 16543 | Gm13597 | 0.0000 | No |
| 16544 | Gm13598 | 0.0000 | No |
| 16545 | Gm13599 | 0.0000 | No |
| 16546 | Gm136   | 0.0000 | No |
| 16547 | Gm13600 | 0.0000 | No |
| 16548 | Gm13601 | 0.0000 | No |
| 16549 | Gm13602 | 0.0000 | No |
| 16550 | Gm13603 | 0.0000 | No |
| 16551 | Gm13604 | 0.0000 | No |
| 16552 | Gm13605 | 0.0000 | No |
| 16553 | Gm13608 | 0.0000 | No |
| 16554 | Gm13609 | 0.0000 | No |
| 16555 | Gm13610 | 0.0000 | No |
| 16556 | Gm13611 | 0.0000 | No |
| 16557 | Gm13612 | 0.0000 | No |



|       |         |        |    |
|-------|---------|--------|----|
| 16558 | Gm13613 | 0.0000 | No |
| 16559 | Gm13614 | 0.0000 | No |
| 16560 | Gm13615 | 0.0000 | No |
| 16561 | Gm13616 | 0.0000 | No |
| 16562 | Gm13617 | 0.0000 | No |
| 16563 | Gm13618 | 0.0000 | No |
| 16564 | Gm13619 | 0.0000 | No |
| 16565 | Gm13620 | 0.0000 | No |
| 16566 | Gm13622 | 0.0000 | No |
| 16567 | Gm13623 | 0.0000 | No |
| 16568 | Gm13624 | 0.0000 | No |
| 16569 | Gm13625 | 0.0000 | No |
| 16570 | Gm13626 | 0.0000 | No |
| 16571 | Gm13627 | 0.0000 | No |
| 16572 | Gm13629 | 0.0000 | No |
| 16573 | Gm13630 | 0.0000 | No |
| 16574 | Gm13631 | 0.0000 | No |
| 16575 | Gm13633 | 0.0000 | No |
| 16576 | Gm13640 | 0.0000 | No |
| 16577 | Gm13641 | 0.0000 | No |
| 16578 | Gm13642 | 0.0000 | No |
| 16579 | Gm13645 | 0.0000 | No |
| 16580 | Gm13648 | 0.0000 | No |
| 16581 | Gm13649 | 0.0000 | No |
| 16582 | Gm13651 | 0.0000 | No |
| 16583 | Gm13652 | 0.0000 | No |
| 16584 | Gm13653 | 0.0000 | No |
| 16585 | Gm13655 | 0.0000 | No |
| 16586 | Gm13656 | 0.0000 | No |
| 16587 | Gm13657 | 0.0000 | No |
| 16588 | Gm13658 | 0.0000 | No |
| 16589 | Gm13660 | 0.0000 | No |
| 16590 | Gm13662 | 0.0000 | No |
| 16591 | Gm13664 | 0.0000 | No |
| 16592 | Gm13665 | 0.0000 | No |
| 16593 | Gm13666 | 0.0000 | No |
| 16594 | Gm13667 | 0.0000 | No |
| 16595 | Gm13668 | 0.0000 | No |
| 16596 | Gm13669 | 0.0000 | No |
| 16597 | Gm13670 | 0.0000 | No |
| 16598 | Gm13673 | 0.0000 | No |
| 16599 | Gm13674 | 0.0000 | No |
| 16600 | Gm13675 | 0.0000 | No |
| 16601 | Gm13676 | 0.0000 | No |
| 16602 | Gm13677 | 0.0000 | No |
| 16603 | Gm13678 | 0.0000 | No |

|       |         |        |    |
|-------|---------|--------|----|
| 16604 | Gm13679 | 0.0000 | No |
| 16605 | Gm13680 | 0.0000 | No |
| 16606 | Gm13681 | 0.0000 | No |
| 16607 | Gm13682 | 0.0000 | No |
| 16608 | Gm13683 | 0.0000 | No |
| 16609 | Gm13684 | 0.0000 | No |
| 16610 | Gm13685 | 0.0000 | No |
| 16611 | Gm13686 | 0.0000 | No |
| 16612 | Gm13688 | 0.0000 | No |
| 16613 | Gm13689 | 0.0000 | No |
| 16614 | Gm13690 | 0.0000 | No |
| 16615 | Gm13691 | 0.0000 | No |
| 16616 | Gm13692 | 0.0000 | No |
| 16617 | Gm13693 | 0.0000 | No |
| 16618 | Gm13694 | 0.0000 | No |
| 16619 | Gm13695 | 0.0000 | No |
| 16620 | Gm13696 | 0.0000 | No |
| 16621 | Gm13697 | 0.0000 | No |
| 16622 | Gm13698 | 0.0000 | No |
| 16623 | Gm13700 | 0.0000 | No |
| 16624 | Gm13702 | 0.0000 | No |
| 16625 | Gm13703 | 0.0000 | No |
| 16626 | Gm13708 | 0.0000 | No |
| 16627 | Gm13709 | 0.0000 | No |
| 16628 | Gm13710 | 0.0000 | No |
| 16629 | Gm13711 | 0.0000 | No |
| 16630 | Gm13712 | 0.0000 | No |
| 16631 | Gm13714 | 0.0000 | No |
| 16632 | Gm13715 | 0.0000 | No |
| 16633 | Gm13716 | 0.0000 | No |
| 16634 | Gm13717 | 0.0000 | No |
| 16635 | Gm13719 | 0.0000 | No |
| 16636 | Gm13723 | 0.0000 | No |
| 16637 | Gm13725 | 0.0000 | No |
| 16638 | Gm13726 | 0.0000 | No |
| 16639 | Gm13727 | 0.0000 | No |
| 16640 | Gm13728 | 0.0000 | No |
| 16641 | Gm13729 | 0.0000 | No |
| 16642 | Gm13730 | 0.0000 | No |
| 16643 | Gm13731 | 0.0000 | No |
| 16644 | Gm13732 | 0.0000 | No |
| 16645 | Gm13733 | 0.0000 | No |
| 16646 | Gm13735 | 0.0000 | No |
| 16647 | Gm13736 | 0.0000 | No |
| 16648 | Gm13737 | 0.0000 | No |
| 16649 | Gm13738 | 0.0000 | No |

|       |         |        |    |
|-------|---------|--------|----|
| 16650 | Gm13739 | 0.0000 | No |
| 16651 | Gm13740 | 0.0000 | No |
| 16652 | Gm13742 | 0.0000 | No |
| 16653 | Gm13743 | 0.0000 | No |
| 16654 | Gm13744 | 0.0000 | No |
| 16655 | Gm13746 | 0.0000 | No |
| 16656 | Gm13748 | 0.0000 | No |
| 16657 | Gm13749 | 0.0000 | No |
| 16658 | Gm13750 | 0.0000 | No |
| 16659 | Gm13752 | 0.0000 | No |
| 16660 | Gm13755 | 0.0000 | No |
| 16661 | Gm13756 | 0.0000 | No |
| 16662 | Gm13758 | 0.0000 | No |
| 16663 | Gm13761 | 0.0000 | No |
| 16664 | Gm13762 | 0.0000 | No |
| 16665 | Gm13767 | 0.0000 | No |
| 16666 | Gm13768 | 0.0000 | No |
| 16667 | Gm13769 | 0.0000 | No |
| 16668 | Gm13771 | 0.0000 | No |
| 16669 | Gm13772 | 0.0000 | No |
| 16670 | Gm13773 | 0.0000 | No |
| 16671 | Gm13776 | 0.0000 | No |
| 16672 | Gm13777 | 0.0000 | No |
| 16673 | Gm13780 | 0.0000 | No |
| 16674 | Gm13782 | 0.0000 | No |
| 16675 | Gm13783 | 0.0000 | No |
| 16676 | Gm13784 | 0.0000 | No |
| 16677 | Gm13785 | 0.0000 | No |
| 16678 | Gm13786 | 0.0000 | No |
| 16679 | Gm13787 | 0.0000 | No |
| 16680 | Gm13790 | 0.0000 | No |
| 16681 | Gm13791 | 0.0000 | No |
| 16682 | Gm13792 | 0.0000 | No |
| 16683 | Gm13793 | 0.0000 | No |
| 16684 | Gm13797 | 0.0000 | No |
| 16685 | Gm13798 | 0.0000 | No |
| 16686 | Gm13799 | 0.0000 | No |
| 16687 | Gm13801 | 0.0000 | No |
| 16688 | Gm13803 | 0.0000 | No |
| 16689 | Gm13804 | 0.0000 | No |
| 16690 | Gm13806 | 0.0000 | No |
| 16691 | Gm13808 | 0.0000 | No |
| 16692 | Gm13809 | 0.0000 | No |
| 16693 | Gm13810 | 0.0000 | No |
| 16694 | Gm13811 | 0.0000 | No |
| 16695 | Gm13812 | 0.0000 | No |

|       |         |        |    |
|-------|---------|--------|----|
| 16696 | Gm13813 | 0.0000 | No |
| 16697 | Gm13814 | 0.0000 | No |
| 16698 | Gm13815 | 0.0000 | No |
| 16699 | Gm13816 | 0.0000 | No |
| 16700 | Gm13817 | 0.0000 | No |
| 16701 | Gm13822 | 0.0000 | No |
| 16702 | Gm13823 | 0.0000 | No |
| 16703 | Gm13828 | 0.0000 | No |
| 16704 | Gm13830 | 0.0000 | No |
| 16705 | Gm13831 | 0.0000 | No |
| 16706 | Gm13832 | 0.0000 | No |
| 16707 | Gm13833 | 0.0000 | No |
| 16708 | Gm13834 | 0.0000 | No |
| 16709 | Gm13835 | 0.0000 | No |
| 16710 | Gm13836 | 0.0000 | No |
| 16711 | Gm13837 | 0.0000 | No |
| 16712 | Gm13838 | 0.0000 | No |
| 16713 | Gm13839 | 0.0000 | No |
| 16714 | Gm13840 | 0.0000 | No |
| 16715 | Gm13842 | 0.0000 | No |
| 16716 | Gm13844 | 0.0000 | No |
| 16717 | Gm13848 | 0.0000 | No |
| 16718 | Gm13849 | 0.0000 | No |
| 16719 | Gm13850 | 0.0000 | No |
| 16720 | Gm13852 | 0.0000 | No |
| 16721 | Gm13853 | 0.0000 | No |
| 16722 | Gm13854 | 0.0000 | No |
| 16723 | Gm13856 | 0.0000 | No |
| 16724 | Gm13858 | 0.0000 | No |
| 16725 | Gm13859 | 0.0000 | No |
| 16726 | Gm13860 | 0.0000 | No |
| 16727 | Gm13861 | 0.0000 | No |
| 16728 | Gm13862 | 0.0000 | No |
| 16729 | Gm13863 | 0.0000 | No |
| 16730 | Gm13864 | 0.0000 | No |
| 16731 | Gm13865 | 0.0000 | No |
| 16732 | Gm13866 | 0.0000 | No |
| 16733 | Gm13868 | 0.0000 | No |
| 16734 | Gm13869 | 0.0000 | No |
| 16735 | Gm13870 | 0.0000 | No |
| 16736 | Gm13871 | 0.0000 | No |
| 16737 | Gm13872 | 0.0000 | No |
| 16738 | Gm13873 | 0.0000 | No |
| 16739 | Gm13875 | 0.0000 | No |
| 16740 | Gm13876 | 0.0000 | No |
| 16741 | Gm13877 | 0.0000 | No |

|       |         |        |    |
|-------|---------|--------|----|
| 16742 | Gm13878 | 0.0000 | No |
| 16743 | Gm13879 | 0.0000 | No |
| 16744 | Gm13880 | 0.0000 | No |
| 16745 | Gm13881 | 0.0000 | No |
| 16746 | Gm13882 | 0.0000 | No |
| 16747 | Gm13883 | 0.0000 | No |
| 16748 | Gm13885 | 0.0000 | No |
| 16749 | Gm13886 | 0.0000 | No |
| 16750 | Gm13887 | 0.0000 | No |
| 16751 | Gm13888 | 0.0000 | No |
| 16752 | Gm13890 | 0.0000 | No |
| 16753 | Gm13898 | 0.0000 | No |
| 16754 | Gm13899 | 0.0000 | No |
| 16755 | Gm13900 | 0.0000 | No |
| 16756 | Gm13901 | 0.0000 | No |
| 16757 | Gm13902 | 0.0000 | No |
| 16758 | Gm13904 | 0.0000 | No |
| 16759 | Gm13910 | 0.0000 | No |
| 16760 | Gm13912 | 0.0000 | No |
| 16761 | Gm13913 | 0.0000 | No |
| 16762 | Gm13914 | 0.0000 | No |
| 16763 | Gm13915 | 0.0000 | No |
| 16764 | Gm13916 | 0.0000 | No |
| 16765 | Gm13919 | 0.0000 | No |
| 16766 | Gm13920 | 0.0000 | No |
| 16767 | Gm13921 | 0.0000 | No |
| 16768 | Gm13922 | 0.0000 | No |
| 16769 | Gm13923 | 0.0000 | No |
| 16770 | Gm13924 | 0.0000 | No |
| 16771 | Gm13925 | 0.0000 | No |
| 16772 | Gm13929 | 0.0000 | No |
| 16773 | Gm13930 | 0.0000 | No |
| 16774 | Gm13932 | 0.0000 | No |
| 16775 | Gm13935 | 0.0000 | No |
| 16776 | Gm13936 | 0.0000 | No |
| 16777 | Gm13937 | 0.0000 | No |
| 16778 | Gm13938 | 0.0000 | No |
| 16779 | Gm13940 | 0.0000 | No |
| 16780 | Gm13941 | 0.0000 | No |
| 16781 | Gm13942 | 0.0000 | No |
| 16782 | Gm13943 | 0.0000 | No |
| 16783 | Gm13954 | 0.0000 | No |
| 16784 | Gm13961 | 0.0000 | No |
| 16785 | Gm13962 | 0.0000 | No |
| 16786 | Gm13964 | 0.0000 | No |
| 16787 | Gm13965 | 0.0000 | No |

|       |         |        |    |
|-------|---------|--------|----|
| 16788 | Gm13966 | 0.0000 | No |
| 16789 | Gm13967 | 0.0000 | No |
| 16790 | Gm13972 | 0.0000 | No |
| 16791 | Gm13973 | 0.0000 | No |
| 16792 | Gm13977 | 0.0000 | No |
| 16793 | Gm13981 | 0.0000 | No |
| 16794 | Gm13982 | 0.0000 | No |
| 16795 | Gm13983 | 0.0000 | No |
| 16796 | Gm13985 | 0.0000 | No |
| 16797 | Gm13988 | 0.0000 | No |
| 16798 | Gm13990 | 0.0000 | No |
| 16799 | Gm13991 | 0.0000 | No |
| 16800 | Gm13992 | 0.0000 | No |
| 16801 | Gm13994 | 0.0000 | No |
| 16802 | Gm13996 | 0.0000 | No |
| 16803 | Gm13997 | 0.0000 | No |
| 16804 | Gm13998 | 0.0000 | No |
| 16805 | Gm13999 | 0.0000 | No |
| 16806 | Gm14000 | 0.0000 | No |
| 16807 | Gm14001 | 0.0000 | No |
| 16808 | Gm14003 | 0.0000 | No |
| 16809 | Gm14004 | 0.0000 | No |
| 16810 | Gm14005 | 0.0000 | No |
| 16811 | Gm14006 | 0.0000 | No |
| 16812 | Gm14007 | 0.0000 | No |
| 16813 | Gm14008 | 0.0000 | No |
| 16814 | Gm14009 | 0.0000 | No |
| 16815 | Gm1401  | 0.0000 | No |
| 16816 | Gm14010 | 0.0000 | No |
| 16817 | Gm14011 | 0.0000 | No |
| 16818 | Gm14012 | 0.0000 | No |
| 16819 | Gm14013 | 0.0000 | No |
| 16820 | Gm14014 | 0.0000 | No |
| 16821 | Gm14015 | 0.0000 | No |
| 16822 | Gm14016 | 0.0000 | No |
| 16823 | Gm14017 | 0.0000 | No |
| 16824 | Gm14018 | 0.0000 | No |
| 16825 | Gm14019 | 0.0000 | No |
| 16826 | Gm14020 | 0.0000 | No |
| 16827 | Gm14021 | 0.0000 | No |
| 16828 | Gm14022 | 0.0000 | No |
| 16829 | Gm14023 | 0.0000 | No |
| 16830 | Gm14024 | 0.0000 | No |
| 16831 | Gm14025 | 0.0000 | No |
| 16832 | Gm14026 | 0.0000 | No |
| 16833 | Gm14027 | 0.0000 | No |

|       |         |        |    |
|-------|---------|--------|----|
| 16834 | Gm14029 | 0.0000 | No |
| 16835 | Gm14033 | 0.0000 | No |
| 16836 | Gm14034 | 0.0000 | No |
| 16837 | Gm14036 | 0.0000 | No |
| 16838 | Gm14037 | 0.0000 | No |
| 16839 | Gm14038 | 0.0000 | No |
| 16840 | Gm14039 | 0.0000 | No |
| 16841 | Gm14040 | 0.0000 | No |
| 16842 | Gm14041 | 0.0000 | No |
| 16843 | Gm14044 | 0.0000 | No |
| 16844 | Gm14046 | 0.0000 | No |
| 16845 | Gm14048 | 0.0000 | No |
| 16846 | Gm14049 | 0.0000 | No |
| 16847 | Gm14050 | 0.0000 | No |
| 16848 | Gm14051 | 0.0000 | No |
| 16849 | Gm14052 | 0.0000 | No |
| 16850 | Gm14053 | 0.0000 | No |
| 16851 | Gm14054 | 0.0000 | No |
| 16852 | Gm14056 | 0.0000 | No |
| 16853 | Gm14057 | 0.0000 | No |
| 16854 | Gm14058 | 0.0000 | No |
| 16855 | Gm14061 | 0.0000 | No |
| 16856 | Gm14062 | 0.0000 | No |
| 16857 | Gm14065 | 0.0000 | No |
| 16858 | Gm14066 | 0.0000 | No |
| 16859 | Gm14067 | 0.0000 | No |
| 16860 | Gm14069 | 0.0000 | No |
| 16861 | Gm14070 | 0.0000 | No |
| 16862 | Gm14071 | 0.0000 | No |
| 16863 | Gm14082 | 0.0000 | No |
| 16864 | Gm14083 | 0.0000 | No |
| 16865 | Gm14085 | 0.0000 | No |
| 16866 | Gm14086 | 0.0000 | No |
| 16867 | Gm14089 | 0.0000 | No |
| 16868 | Gm14091 | 0.0000 | No |
| 16869 | Gm14092 | 0.0000 | No |
| 16870 | Gm14093 | 0.0000 | No |
| 16871 | Gm14094 | 0.0000 | No |
| 16872 | Gm14095 | 0.0000 | No |
| 16873 | Gm14097 | 0.0000 | No |
| 16874 | Gm14099 | 0.0000 | No |
| 16875 | Gm14101 | 0.0000 | No |
| 16876 | Gm14102 | 0.0000 | No |
| 16877 | Gm14103 | 0.0000 | No |
| 16878 | Gm14104 | 0.0000 | No |
| 16879 | Gm14106 | 0.0000 | No |

|       |         |        |    |
|-------|---------|--------|----|
| 16880 | Gm14107 | 0.0000 | No |
| 16881 | Gm14108 | 0.0000 | No |
| 16882 | Gm14111 | 0.0000 | No |
| 16883 | Gm14114 | 0.0000 | No |
| 16884 | Gm14115 | 0.0000 | No |
| 16885 | Gm14116 | 0.0000 | No |
| 16886 | Gm14117 | 0.0000 | No |
| 16887 | Gm14119 | 0.0000 | No |
| 16888 | Gm14120 | 0.0000 | No |
| 16889 | Gm14121 | 0.0000 | No |
| 16890 | Gm14122 | 0.0000 | No |
| 16891 | Gm14123 | 0.0000 | No |
| 16892 | Gm14124 | 0.0000 | No |
| 16893 | Gm14125 | 0.0000 | No |
| 16894 | Gm14126 | 0.0000 | No |
| 16895 | Gm14127 | 0.0000 | No |
| 16896 | Gm14128 | 0.0000 | No |
| 16897 | Gm14130 | 0.0000 | No |
| 16898 | Gm14131 | 0.0000 | No |
| 16899 | Gm14132 | 0.0000 | No |
| 16900 | Gm14135 | 0.0000 | No |
| 16901 | Gm14137 | 0.0000 | No |
| 16902 | Gm14138 | 0.0000 | No |
| 16903 | Gm14139 | 0.0000 | No |
| 16904 | Gm14140 | 0.0000 | No |
| 16905 | Gm14141 | 0.0000 | No |
| 16906 | Gm14142 | 0.0000 | No |
| 16907 | Gm14143 | 0.0000 | No |
| 16908 | Gm14144 | 0.0000 | No |
| 16909 | Gm14145 | 0.0000 | No |
| 16910 | Gm14146 | 0.0000 | No |
| 16911 | Gm14147 | 0.0000 | No |
| 16912 | Gm14148 | 0.0000 | No |
| 16913 | Gm14149 | 0.0000 | No |
| 16914 | Gm14150 | 0.0000 | No |
| 16915 | Gm14151 | 0.0000 | No |
| 16916 | Gm14152 | 0.0000 | No |
| 16917 | Gm14153 | 0.0000 | No |
| 16918 | Gm14154 | 0.0000 | No |
| 16919 | Gm14155 | 0.0000 | No |
| 16920 | Gm14158 | 0.0000 | No |
| 16921 | Gm14159 | 0.0000 | No |
| 16922 | Gm14162 | 0.0000 | No |
| 16923 | Gm14163 | 0.0000 | No |
| 16924 | Gm14164 | 0.0000 | No |
| 16925 | Gm14165 | 0.0000 | No |



|       |         |        |    |
|-------|---------|--------|----|
| 16926 | Gm14167 | 0.0000 | No |
| 16927 | Gm14168 | 0.0000 | No |
| 16928 | Gm14169 | 0.0000 | No |
| 16929 | Gm14170 | 0.0000 | No |
| 16930 | Gm14172 | 0.0000 | No |
| 16931 | Gm14173 | 0.0000 | No |
| 16932 | Gm14174 | 0.0000 | No |
| 16933 | Gm14175 | 0.0000 | No |
| 16934 | Gm14176 | 0.0000 | No |
| 16935 | Gm14180 | 0.0000 | No |
| 16936 | Gm14188 | 0.0000 | No |
| 16937 | Gm14190 | 0.0000 | No |
| 16938 | Gm14193 | 0.0000 | No |
| 16939 | Gm14197 | 0.0000 | No |
| 16940 | Gm14198 | 0.0000 | No |
| 16941 | Gm14199 | 0.0000 | No |
| 16942 | Gm14200 | 0.0000 | No |
| 16943 | Gm14201 | 0.0000 | No |
| 16944 | Gm14202 | 0.0000 | No |
| 16945 | Gm14204 | 0.0000 | No |
| 16946 | Gm14205 | 0.0000 | No |
| 16947 | Gm14206 | 0.0000 | No |
| 16948 | Gm14207 | 0.0000 | No |
| 16949 | Gm14211 | 0.0000 | No |
| 16950 | Gm14212 | 0.0000 | No |
| 16951 | Gm14213 | 0.0000 | No |
| 16952 | Gm14214 | 0.0000 | No |
| 16953 | Gm14215 | 0.0000 | No |
| 16954 | Gm14216 | 0.0000 | No |
| 16955 | Gm14219 | 0.0000 | No |
| 16956 | Gm14220 | 0.0000 | No |
| 16957 | Gm14221 | 0.0000 | No |
| 16958 | Gm14222 | 0.0000 | No |
| 16959 | Gm14223 | 0.0000 | No |
| 16960 | Gm14227 | 0.0000 | No |
| 16961 | Gm14229 | 0.0000 | No |
| 16962 | Gm14230 | 0.0000 | No |
| 16963 | Gm14231 | 0.0000 | No |
| 16964 | Gm14232 | 0.0000 | No |
| 16965 | Gm14233 | 0.0000 | No |
| 16966 | Gm14234 | 0.0000 | No |
| 16967 | Gm14235 | 0.0000 | No |
| 16968 | Gm14236 | 0.0000 | No |
| 16969 | Gm14238 | 0.0000 | No |
| 16970 | Gm14239 | 0.0000 | No |
| 16971 | Gm14240 | 0.0000 | No |

|       |         |        |    |
|-------|---------|--------|----|
| 16972 | Gm14241 | 0.0000 | No |
| 16973 | Gm14242 | 0.0000 | No |
| 16974 | Gm14243 | 0.0000 | No |
| 16975 | Gm14244 | 0.0000 | No |
| 16976 | Gm14245 | 0.0000 | No |
| 16977 | Gm14246 | 0.0000 | No |
| 16978 | Gm14247 | 0.0000 | No |
| 16979 | Gm14248 | 0.0000 | No |
| 16980 | Gm14249 | 0.0000 | No |
| 16981 | Gm14251 | 0.0000 | No |
| 16982 | Gm14252 | 0.0000 | No |
| 16983 | Gm14253 | 0.0000 | No |
| 16984 | Gm14254 | 0.0000 | No |
| 16985 | Gm14255 | 0.0000 | No |
| 16986 | Gm14257 | 0.0000 | No |
| 16987 | Gm14258 | 0.0000 | No |
| 16988 | Gm14260 | 0.0000 | No |
| 16989 | Gm14261 | 0.0000 | No |
| 16990 | Gm14262 | 0.0000 | No |
| 16991 | Gm14263 | 0.0000 | No |
| 16992 | Gm14266 | 0.0000 | No |
| 16993 | Gm14268 | 0.0000 | No |
| 16994 | Gm14269 | 0.0000 | No |
| 16995 | Gm14270 | 0.0000 | No |
| 16996 | Gm14271 | 0.0000 | No |
| 16997 | Gm14272 | 0.0000 | No |
| 16998 | Gm14273 | 0.0000 | No |
| 16999 | Gm14274 | 0.0000 | No |
| 17000 | Gm14276 | 0.0000 | No |
| 17001 | Gm14277 | 0.0000 | No |
| 17002 | Gm14278 | 0.0000 | No |
| 17003 | Gm14279 | 0.0000 | No |
| 17004 | Gm14281 | 0.0000 | No |
| 17005 | Gm14282 | 0.0000 | No |
| 17006 | Gm14283 | 0.0000 | No |
| 17007 | Gm14285 | 0.0000 | No |
| 17008 | Gm14286 | 0.0000 | No |
| 17009 | Gm14287 | 0.0000 | No |
| 17010 | Gm14291 | 0.0000 | No |
| 17011 | Gm14292 | 0.0000 | No |
| 17012 | Gm14293 | 0.0000 | No |
| 17013 | Gm14294 | 0.0000 | No |
| 17014 | Gm14295 | 0.0000 | No |
| 17015 | Gm14296 | 0.0000 | No |
| 17016 | Gm14297 | 0.0000 | No |
| 17017 | Gm14298 | 0.0000 | No |

|       |         |        |    |
|-------|---------|--------|----|
| 17018 | Gm14299 | 0.0000 | No |
| 17019 | Gm14300 | 0.0000 | No |
| 17020 | Gm14301 | 0.0000 | No |
| 17021 | Gm14302 | 0.0000 | No |
| 17022 | Gm14303 | 0.0000 | No |
| 17023 | Gm14304 | 0.0000 | No |
| 17024 | Gm14305 | 0.0000 | No |
| 17025 | Gm14306 | 0.0000 | No |
| 17026 | Gm14307 | 0.0000 | No |
| 17027 | Gm14308 | 0.0000 | No |
| 17028 | Gm14317 | 0.0000 | No |
| 17029 | Gm14319 | 0.0000 | No |
| 17030 | Gm14320 | 0.0000 | No |
| 17031 | Gm14321 | 0.0000 | No |
| 17032 | Gm14322 | 0.0000 | No |
| 17033 | Gm14323 | 0.0000 | No |
| 17034 | Gm14324 | 0.0000 | No |
| 17035 | Gm14325 | 0.0000 | No |
| 17036 | Gm14326 | 0.0000 | No |
| 17037 | Gm14327 | 0.0000 | No |
| 17038 | Gm14329 | 0.0000 | No |
| 17039 | Gm14330 | 0.0000 | No |
| 17040 | Gm14331 | 0.0000 | No |
| 17041 | Gm14332 | 0.0000 | No |
| 17042 | Gm14333 | 0.0000 | No |
| 17043 | Gm14334 | 0.0000 | No |
| 17044 | Gm14335 | 0.0000 | No |
| 17045 | Gm14336 | 0.0000 | No |
| 17046 | Gm14340 | 0.0000 | No |
| 17047 | Gm14341 | 0.0000 | No |
| 17048 | Gm14343 | 0.0000 | No |
| 17049 | Gm14344 | 0.0000 | No |
| 17050 | Gm14345 | 0.0000 | No |
| 17051 | Gm14346 | 0.0000 | No |
| 17052 | Gm14347 | 0.0000 | No |
| 17053 | Gm14348 | 0.0000 | No |
| 17054 | Gm14349 | 0.0000 | No |
| 17055 | Gm14350 | 0.0000 | No |
| 17056 | Gm14351 | 0.0000 | No |
| 17057 | Gm14352 | 0.0000 | No |
| 17058 | Gm14353 | 0.0000 | No |
| 17059 | Gm14355 | 0.0000 | No |
| 17060 | Gm14356 | 0.0000 | No |
| 17061 | Gm14357 | 0.0000 | No |
| 17062 | Gm14358 | 0.0000 | No |
| 17063 | Gm14359 | 0.0000 | No |

|       |         |        |    |
|-------|---------|--------|----|
| 17064 | Gm14360 | 0.0000 | No |
| 17065 | Gm14361 | 0.0000 | No |
| 17066 | Gm14362 | 0.0000 | No |
| 17067 | Gm14363 | 0.0000 | No |
| 17068 | Gm14364 | 0.0000 | No |
| 17069 | Gm14365 | 0.0000 | No |
| 17070 | Gm14366 | 0.0000 | No |
| 17071 | Gm14367 | 0.0000 | No |
| 17072 | Gm14368 | 0.0000 | No |
| 17073 | Gm14369 | 0.0000 | No |
| 17074 | Gm14370 | 0.0000 | No |
| 17075 | Gm14371 | 0.0000 | No |
| 17076 | Gm14372 | 0.0000 | No |
| 17077 | Gm14373 | 0.0000 | No |
| 17078 | Gm14374 | 0.0000 | No |
| 17079 | Gm14376 | 0.0000 | No |
| 17080 | Gm14377 | 0.0000 | No |
| 17081 | Gm14379 | 0.0000 | No |
| 17082 | Gm14380 | 0.0000 | No |
| 17083 | Gm14382 | 0.0000 | No |
| 17084 | Gm14383 | 0.0000 | No |
| 17085 | Gm14385 | 0.0000 | No |
| 17086 | Gm14387 | 0.0000 | No |
| 17087 | Gm14388 | 0.0000 | No |
| 17088 | Gm14389 | 0.0000 | No |
| 17089 | Gm14390 | 0.0000 | No |
| 17090 | Gm14391 | 0.0000 | No |
| 17091 | Gm14392 | 0.0000 | No |
| 17092 | Gm14394 | 0.0000 | No |
| 17093 | Gm14395 | 0.0000 | No |
| 17094 | Gm14396 | 0.0000 | No |
| 17095 | Gm14398 | 0.0000 | No |
| 17096 | Gm14399 | 0.0000 | No |
| 17097 | Gm14400 | 0.0000 | No |
| 17098 | Gm14401 | 0.0000 | No |
| 17099 | Gm14402 | 0.0000 | No |
| 17100 | Gm14403 | 0.0000 | No |
| 17101 | Gm14404 | 0.0000 | No |
| 17102 | Gm14405 | 0.0000 | No |
| 17103 | Gm14406 | 0.0000 | No |
| 17104 | Gm14407 | 0.0000 | No |
| 17105 | Gm14408 | 0.0000 | No |
| 17106 | Gm14410 | 0.0000 | No |
| 17107 | Gm14411 | 0.0000 | No |
| 17108 | Gm14412 | 0.0000 | No |
| 17109 | Gm14413 | 0.0000 | No |

|       |         |        |    |
|-------|---------|--------|----|
| 17110 | Gm14414 | 0.0000 | No |
| 17111 | Gm14416 | 0.0000 | No |
| 17112 | Gm14417 | 0.0000 | No |
| 17113 | Gm14418 | 0.0000 | No |
| 17114 | Gm14419 | 0.0000 | No |
| 17115 | Gm14421 | 0.0000 | No |
| 17116 | Gm14424 | 0.0000 | No |
| 17117 | Gm14425 | 0.0000 | No |
| 17118 | Gm14426 | 0.0000 | No |
| 17119 | Gm14427 | 0.0000 | No |
| 17120 | Gm14428 | 0.0000 | No |
| 17121 | Gm14429 | 0.0000 | No |
| 17122 | Gm14434 | 0.0000 | No |
| 17123 | Gm14435 | 0.0000 | No |
| 17124 | Gm14437 | 0.0000 | No |
| 17125 | Gm14438 | 0.0000 | No |
| 17126 | Gm14440 | 0.0000 | No |
| 17127 | Gm14441 | 0.0000 | No |
| 17128 | Gm14442 | 0.0000 | No |
| 17129 | Gm14443 | 0.0000 | No |
| 17130 | Gm14444 | 0.0000 | No |
| 17131 | Gm14450 | 0.0000 | No |
| 17132 | Gm14451 | 0.0000 | No |
| 17133 | Gm14452 | 0.0000 | No |
| 17134 | Gm14453 | 0.0000 | No |
| 17135 | Gm14457 | 0.0000 | No |
| 17136 | Gm14459 | 0.0000 | No |
| 17137 | Gm14460 | 0.0000 | No |
| 17138 | Gm14463 | 0.0000 | No |
| 17139 | Gm14464 | 0.0000 | No |
| 17140 | Gm14465 | 0.0000 | No |
| 17141 | Gm14466 | 0.0000 | No |
| 17142 | Gm14470 | 0.0000 | No |
| 17143 | Gm14471 | 0.0000 | No |
| 17144 | Gm14472 | 0.0000 | No |
| 17145 | Gm14473 | 0.0000 | No |
| 17146 | Gm14480 | 0.0000 | No |
| 17147 | Gm14481 | 0.0000 | No |
| 17148 | Gm14485 | 0.0000 | No |
| 17149 | Gm14486 | 0.0000 | No |
| 17150 | Gm14487 | 0.0000 | No |
| 17151 | Gm14493 | 0.0000 | No |
| 17152 | Gm14494 | 0.0000 | No |
| 17153 | Gm14496 | 0.0000 | No |
| 17154 | Gm14497 | 0.0000 | No |
| 17155 | Gm14500 | 0.0000 | No |

|       |         |        |    |
|-------|---------|--------|----|
| 17156 | Gm14502 | 0.0000 | No |
| 17157 | Gm14503 | 0.0000 | No |
| 17158 | Gm14504 | 0.0000 | No |
| 17159 | Gm14505 | 0.0000 | No |
| 17160 | Gm14506 | 0.0000 | No |
| 17161 | Gm14508 | 0.0000 | No |
| 17162 | Gm14509 | 0.0000 | No |
| 17163 | Gm14510 | 0.0000 | No |
| 17164 | Gm14512 | 0.0000 | No |
| 17165 | Gm14513 | 0.0000 | No |
| 17166 | Gm14514 | 0.0000 | No |
| 17167 | Gm14515 | 0.0000 | No |
| 17168 | Gm14516 | 0.0000 | No |
| 17169 | Gm14517 | 0.0000 | No |
| 17170 | Gm14518 | 0.0000 | No |
| 17171 | Gm14519 | 0.0000 | No |
| 17172 | Gm14520 | 0.0000 | No |
| 17173 | Gm14523 | 0.0000 | No |
| 17174 | Gm14524 | 0.0000 | No |
| 17175 | Gm14525 | 0.0000 | No |
| 17176 | Gm14527 | 0.0000 | No |
| 17177 | Gm14528 | 0.0000 | No |
| 17178 | Gm14531 | 0.0000 | No |
| 17179 | Gm14532 | 0.0000 | No |
| 17180 | Gm14533 | 0.0000 | No |
| 17181 | Gm14534 | 0.0000 | No |
| 17182 | Gm14536 | 0.0000 | No |
| 17183 | Gm14537 | 0.0000 | No |
| 17184 | Gm14538 | 0.0000 | No |
| 17185 | Gm14539 | 0.0000 | No |
| 17186 | Gm14540 | 0.0000 | No |
| 17187 | Gm14541 | 0.0000 | No |
| 17188 | Gm14542 | 0.0000 | No |
| 17189 | Gm14547 | 0.0000 | No |
| 17190 | Gm14548 | 0.0000 | No |
| 17191 | Gm14549 | 0.0000 | No |
| 17192 | Gm14550 | 0.0000 | No |
| 17193 | Gm14551 | 0.0000 | No |
| 17194 | Gm14552 | 0.0000 | No |
| 17195 | Gm14553 | 0.0000 | No |
| 17196 | Gm14554 | 0.0000 | No |
| 17197 | Gm14558 | 0.0000 | No |
| 17198 | Gm14559 | 0.0000 | No |
| 17199 | Gm14560 | 0.0000 | No |
| 17200 | Gm14561 | 0.0000 | No |
| 17201 | Gm14562 | 0.0000 | No |

|       |         |        |    |
|-------|---------|--------|----|
| 17202 | Gm14563 | 0.0000 | No |
| 17203 | Gm14564 | 0.0000 | No |
| 17204 | Gm14565 | 0.0000 | No |
| 17205 | Gm14566 | 0.0000 | No |
| 17206 | Gm14567 | 0.0000 | No |
| 17207 | Gm14568 | 0.0000 | No |
| 17208 | Gm14569 | 0.0000 | No |
| 17209 | Gm14570 | 0.0000 | No |
| 17210 | Gm14571 | 0.0000 | No |
| 17211 | Gm14573 | 0.0000 | No |
| 17212 | Gm14574 | 0.0000 | No |
| 17213 | Gm14576 | 0.0000 | No |
| 17214 | Gm14577 | 0.0000 | No |
| 17215 | Gm14578 | 0.0000 | No |
| 17216 | Gm14579 | 0.0000 | No |
| 17217 | Gm14580 | 0.0000 | No |
| 17218 | Gm14582 | 0.0000 | No |
| 17219 | Gm14584 | 0.0000 | No |
| 17220 | Gm14585 | 0.0000 | No |
| 17221 | Gm14586 | 0.0000 | No |
| 17222 | Gm14588 | 0.0000 | No |
| 17223 | Gm14589 | 0.0000 | No |
| 17224 | Gm14590 | 0.0000 | No |
| 17225 | Gm14593 | 0.0000 | No |
| 17226 | Gm14594 | 0.0000 | No |
| 17227 | Gm14595 | 0.0000 | No |
| 17228 | Gm14596 | 0.0000 | No |
| 17229 | Gm14597 | 0.0000 | No |
| 17230 | Gm14598 | 0.0000 | No |
| 17231 | Gm14599 | 0.0000 | No |
| 17232 | Gm14600 | 0.0000 | No |
| 17233 | Gm14601 | 0.0000 | No |
| 17234 | Gm14602 | 0.0000 | No |
| 17235 | Gm14603 | 0.0000 | No |
| 17236 | Gm14605 | 0.0000 | No |
| 17237 | Gm14606 | 0.0000 | No |
| 17238 | Gm14607 | 0.0000 | No |
| 17239 | Gm14608 | 0.0000 | No |
| 17240 | Gm14609 | 0.0000 | No |
| 17241 | Gm14610 | 0.0000 | No |
| 17242 | Gm14612 | 0.0000 | No |
| 17243 | Gm14613 | 0.0000 | No |
| 17244 | Gm14614 | 0.0000 | No |
| 17245 | Gm14615 | 0.0000 | No |
| 17246 | Gm14618 | 0.0000 | No |
| 17247 | Gm14619 | 0.0000 | No |

|       |         |        |    |
|-------|---------|--------|----|
| 17248 | Gm14620 | 0.0000 | No |
| 17249 | Gm14621 | 0.0000 | No |
| 17250 | Gm14622 | 0.0000 | No |
| 17251 | Gm14623 | 0.0000 | No |
| 17252 | Gm14624 | 0.0000 | No |
| 17253 | Gm14625 | 0.0000 | No |
| 17254 | Gm14626 | 0.0000 | No |
| 17255 | Gm14627 | 0.0000 | No |
| 17256 | Gm14628 | 0.0000 | No |
| 17257 | Gm14629 | 0.0000 | No |
| 17258 | Gm14630 | 0.0000 | No |
| 17259 | Gm14631 | 0.0000 | No |
| 17260 | Gm14632 | 0.0000 | No |
| 17261 | Gm14633 | 0.0000 | No |
| 17262 | Gm14634 | 0.0000 | No |
| 17263 | Gm14635 | 0.0000 | No |
| 17264 | Gm14637 | 0.0000 | No |
| 17265 | Gm14639 | 0.0000 | No |
| 17266 | Gm14640 | 0.0000 | No |
| 17267 | Gm14641 | 0.0000 | No |
| 17268 | Gm14643 | 0.0000 | No |
| 17269 | Gm14644 | 0.0000 | No |
| 17270 | Gm14645 | 0.0000 | No |
| 17271 | Gm14647 | 0.0000 | No |
| 17272 | Gm14648 | 0.0000 | No |
| 17273 | Gm14649 | 0.0000 | No |
| 17274 | Gm14650 | 0.0000 | No |
| 17275 | Gm14651 | 0.0000 | No |
| 17276 | Gm14652 | 0.0000 | No |
| 17277 | Gm14653 | 0.0000 | No |
| 17278 | Gm14654 | 0.0000 | No |
| 17279 | Gm14655 | 0.0000 | No |
| 17280 | Gm14656 | 0.0000 | No |
| 17281 | Gm14657 | 0.0000 | No |
| 17282 | Gm14659 | 0.0000 | No |
| 17283 | Gm14660 | 0.0000 | No |
| 17284 | Gm14662 | 0.0000 | No |
| 17285 | Gm14663 | 0.0000 | No |
| 17286 | Gm14665 | 0.0000 | No |
| 17287 | Gm14666 | 0.0000 | No |
| 17288 | Gm14667 | 0.0000 | No |
| 17289 | Gm14668 | 0.0000 | No |
| 17290 | Gm14669 | 0.0000 | No |
| 17291 | Gm14670 | 0.0000 | No |
| 17292 | Gm14671 | 0.0000 | No |
| 17293 | Gm14673 | 0.0000 | No |



|       |         |        |    |
|-------|---------|--------|----|
| 17294 | Gm14674 | 0.0000 | No |
| 17295 | Gm14676 | 0.0000 | No |
| 17296 | Gm14677 | 0.0000 | No |
| 17297 | Gm14678 | 0.0000 | No |
| 17298 | Gm14680 | 0.0000 | No |
| 17299 | Gm14681 | 0.0000 | No |
| 17300 | Gm14682 | 0.0000 | No |
| 17301 | Gm14684 | 0.0000 | No |
| 17302 | Gm14685 | 0.0000 | No |
| 17303 | Gm14686 | 0.0000 | No |
| 17304 | Gm14687 | 0.0000 | No |
| 17305 | Gm14688 | 0.0000 | No |
| 17306 | Gm14692 | 0.0000 | No |
| 17307 | Gm14694 | 0.0000 | No |
| 17308 | Gm14695 | 0.0000 | No |
| 17309 | Gm14696 | 0.0000 | No |
| 17310 | Gm14697 | 0.0000 | No |
| 17311 | Gm14698 | 0.0000 | No |
| 17312 | Gm14699 | 0.0000 | No |
| 17313 | Gm14701 | 0.0000 | No |
| 17314 | Gm14703 | 0.0000 | No |
| 17315 | Gm14704 | 0.0000 | No |
| 17316 | Gm14705 | 0.0000 | No |
| 17317 | Gm14706 | 0.0000 | No |
| 17318 | Gm14707 | 0.0000 | No |
| 17319 | Gm14709 | 0.0000 | No |
| 17320 | Gm14710 | 0.0000 | No |
| 17321 | Gm14711 | 0.0000 | No |
| 17322 | Gm14712 | 0.0000 | No |
| 17323 | Gm14713 | 0.0000 | No |
| 17324 | Gm14714 | 0.0000 | No |
| 17325 | Gm14715 | 0.0000 | No |
| 17326 | Gm14717 | 0.0000 | No |
| 17327 | Gm14718 | 0.0000 | No |
| 17328 | Gm14719 | 0.0000 | No |
| 17329 | Gm14721 | 0.0000 | No |
| 17330 | Gm14722 | 0.0000 | No |
| 17331 | Gm14723 | 0.0000 | No |
| 17332 | Gm14724 | 0.0000 | No |
| 17333 | Gm14725 | 0.0000 | No |
| 17334 | Gm14726 | 0.0000 | No |
| 17335 | Gm14727 | 0.0000 | No |
| 17336 | Gm14728 | 0.0000 | No |
| 17337 | Gm14729 | 0.0000 | No |
| 17338 | Gm14730 | 0.0000 | No |
| 17339 | Gm14732 | 0.0000 | No |

|       |         |        |    |
|-------|---------|--------|----|
| 17340 | Gm14733 | 0.0000 | No |
| 17341 | Gm14736 | 0.0000 | No |
| 17342 | Gm14739 | 0.0000 | No |
| 17343 | Gm14740 | 0.0000 | No |
| 17344 | Gm14741 | 0.0000 | No |
| 17345 | Gm14742 | 0.0000 | No |
| 17346 | Gm14743 | 0.0000 | No |
| 17347 | Gm14744 | 0.0000 | No |
| 17348 | Gm14746 | 0.0000 | No |
| 17349 | Gm14747 | 0.0000 | No |
| 17350 | Gm14748 | 0.0000 | No |
| 17351 | Gm14749 | 0.0000 | No |
| 17352 | Gm14750 | 0.0000 | No |
| 17353 | Gm14751 | 0.0000 | No |
| 17354 | Gm14753 | 0.0000 | No |
| 17355 | Gm14754 | 0.0000 | No |
| 17356 | Gm14755 | 0.0000 | No |
| 17357 | Gm14756 | 0.0000 | No |
| 17358 | Gm14758 | 0.0000 | No |
| 17359 | Gm14760 | 0.0000 | No |
| 17360 | Gm14761 | 0.0000 | No |
| 17361 | Gm14762 | 0.0000 | No |
| 17362 | Gm14766 | 0.0000 | No |
| 17363 | Gm14767 | 0.0000 | No |
| 17364 | Gm14768 | 0.0000 | No |
| 17365 | Gm14769 | 0.0000 | No |
| 17366 | Gm14770 | 0.0000 | No |
| 17367 | Gm14771 | 0.0000 | No |
| 17368 | Gm14772 | 0.0000 | No |
| 17369 | Gm14773 | 0.0000 | No |
| 17370 | Gm14774 | 0.0000 | No |
| 17371 | Gm14775 | 0.0000 | No |
| 17372 | Gm14776 | 0.0000 | No |
| 17373 | Gm14777 | 0.0000 | No |
| 17374 | Gm14780 | 0.0000 | No |
| 17375 | Gm14781 | 0.0000 | No |
| 17376 | Gm14782 | 0.0000 | No |
| 17377 | Gm14783 | 0.0000 | No |
| 17378 | Gm14784 | 0.0000 | No |
| 17379 | Gm14785 | 0.0000 | No |
| 17380 | Gm14786 | 0.0000 | No |
| 17381 | Gm14788 | 0.0000 | No |
| 17382 | Gm14791 | 0.0000 | No |
| 17383 | Gm14792 | 0.0000 | No |
| 17384 | Gm14794 | 0.0000 | No |
| 17385 | Gm14795 | 0.0000 | No |

|       |         |        |    |
|-------|---------|--------|----|
| 17386 | Gm14796 | 0.0000 | No |
| 17387 | Gm14797 | 0.0000 | No |
| 17388 | Gm14798 | 0.0000 | No |
| 17389 | Gm14799 | 0.0000 | No |
| 17390 | Gm14800 | 0.0000 | No |
| 17391 | Gm14802 | 0.0000 | No |
| 17392 | Gm14803 | 0.0000 | No |
| 17393 | Gm14804 | 0.0000 | No |
| 17394 | Gm14805 | 0.0000 | No |
| 17395 | Gm14807 | 0.0000 | No |
| 17396 | Gm14808 | 0.0000 | No |
| 17397 | Gm14809 | 0.0000 | No |
| 17398 | Gm14810 | 0.0000 | No |
| 17399 | Gm14811 | 0.0000 | No |
| 17400 | Gm14812 | 0.0000 | No |
| 17401 | Gm14813 | 0.0000 | No |
| 17402 | Gm14815 | 0.0000 | No |
| 17403 | Gm14816 | 0.0000 | No |
| 17404 | Gm14818 | 0.0000 | No |
| 17405 | Gm14819 | 0.0000 | No |
| 17406 | Gm14820 | 0.0000 | No |
| 17407 | Gm14821 | 0.0000 | No |
| 17408 | Gm14822 | 0.0000 | No |
| 17409 | Gm14823 | 0.0000 | No |
| 17410 | Gm14824 | 0.0000 | No |
| 17411 | Gm14825 | 0.0000 | No |
| 17412 | Gm14826 | 0.0000 | No |
| 17413 | Gm14827 | 0.0000 | No |
| 17414 | Gm14829 | 0.0000 | No |
| 17415 | Gm14830 | 0.0000 | No |
| 17416 | Gm14831 | 0.0000 | No |
| 17417 | Gm14832 | 0.0000 | No |
| 17418 | Gm14833 | 0.0000 | No |
| 17419 | Gm14834 | 0.0000 | No |
| 17420 | Gm14835 | 0.0000 | No |
| 17421 | Gm14836 | 0.0000 | No |
| 17422 | Gm14837 | 0.0000 | No |
| 17423 | Gm14838 | 0.0000 | No |
| 17424 | Gm14839 | 0.0000 | No |
| 17425 | Gm14840 | 0.0000 | No |
| 17426 | Gm14841 | 0.0000 | No |
| 17427 | Gm14842 | 0.0000 | No |
| 17428 | Gm14845 | 0.0000 | No |
| 17429 | Gm14846 | 0.0000 | No |
| 17430 | Gm14847 | 0.0000 | No |
| 17431 | Gm14849 | 0.0000 | No |

|       |         |        |    |
|-------|---------|--------|----|
| 17432 | Gm14853 | 0.0000 | No |
| 17433 | Gm14854 | 0.0000 | No |
| 17434 | Gm14855 | 0.0000 | No |
| 17435 | Gm14856 | 0.0000 | No |
| 17436 | Gm14857 | 0.0000 | No |
| 17437 | Gm14858 | 0.0000 | No |
| 17438 | Gm14859 | 0.0000 | No |
| 17439 | Gm14860 | 0.0000 | No |
| 17440 | Gm14861 | 0.0000 | No |
| 17441 | Gm14862 | 0.0000 | No |
| 17442 | Gm14863 | 0.0000 | No |
| 17443 | Gm14864 | 0.0000 | No |
| 17444 | Gm14865 | 0.0000 | No |
| 17445 | Gm14866 | 0.0000 | No |
| 17446 | Gm14867 | 0.0000 | No |
| 17447 | Gm14868 | 0.0000 | No |
| 17448 | Gm14869 | 0.0000 | No |
| 17449 | Gm14870 | 0.0000 | No |
| 17450 | Gm14871 | 0.0000 | No |
| 17451 | Gm14874 | 0.0000 | No |
| 17452 | Gm14875 | 0.0000 | No |
| 17453 | Gm14876 | 0.0000 | No |
| 17454 | Gm14878 | 0.0000 | No |
| 17455 | Gm14879 | 0.0000 | No |
| 17456 | Gm14880 | 0.0000 | No |
| 17457 | Gm14881 | 0.0000 | No |
| 17458 | Gm14882 | 0.0000 | No |
| 17459 | Gm14883 | 0.0000 | No |
| 17460 | Gm14884 | 0.0000 | No |
| 17461 | Gm14885 | 0.0000 | No |
| 17462 | Gm14886 | 0.0000 | No |
| 17463 | Gm14887 | 0.0000 | No |
| 17464 | Gm14890 | 0.0000 | No |
| 17465 | Gm14891 | 0.0000 | No |
| 17466 | Gm14892 | 0.0000 | No |
| 17467 | Gm14893 | 0.0000 | No |
| 17468 | Gm14894 | 0.0000 | No |
| 17469 | Gm14895 | 0.0000 | No |
| 17470 | Gm14898 | 0.0000 | No |
| 17471 | Gm14899 | 0.0000 | No |
| 17472 | Gm14900 | 0.0000 | No |
| 17473 | Gm14901 | 0.0000 | No |
| 17474 | Gm14902 | 0.0000 | No |
| 17475 | Gm14903 | 0.0000 | No |
| 17476 | Gm14904 | 0.0000 | No |
| 17477 | Gm14905 | 0.0000 | No |

|       |         |        |    |
|-------|---------|--------|----|
| 17478 | Gm14906 | 0.0000 | No |
| 17479 | Gm14907 | 0.0000 | No |
| 17480 | Gm14909 | 0.0000 | No |
| 17481 | Gm14910 | 0.0000 | No |
| 17482 | Gm14912 | 0.0000 | No |
| 17483 | Gm14913 | 0.0000 | No |
| 17484 | Gm14914 | 0.0000 | No |
| 17485 | Gm14915 | 0.0000 | No |
| 17486 | Gm14916 | 0.0000 | No |
| 17487 | Gm14917 | 0.0000 | No |
| 17488 | Gm14918 | 0.0000 | No |
| 17489 | Gm14919 | 0.0000 | No |
| 17490 | Gm14922 | 0.0000 | No |
| 17491 | Gm14923 | 0.0000 | No |
| 17492 | Gm14925 | 0.0000 | No |
| 17493 | Gm14926 | 0.0000 | No |
| 17494 | Gm14927 | 0.0000 | No |
| 17495 | Gm14928 | 0.0000 | No |
| 17496 | Gm14929 | 0.0000 | No |
| 17497 | Gm14930 | 0.0000 | No |
| 17498 | Gm14931 | 0.0000 | No |
| 17499 | Gm14932 | 0.0000 | No |
| 17500 | Gm14937 | 0.0000 | No |
| 17501 | Gm14938 | 0.0000 | No |
| 17502 | Gm14939 | 0.0000 | No |
| 17503 | Gm14940 | 0.0000 | No |
| 17504 | Gm14942 | 0.0000 | No |
| 17505 | Gm14943 | 0.0000 | No |
| 17506 | Gm14945 | 0.0000 | No |
| 17507 | Gm14946 | 0.0000 | No |
| 17508 | Gm14947 | 0.0000 | No |
| 17509 | Gm14950 | 0.0000 | No |
| 17510 | Gm14951 | 0.0000 | No |
| 17511 | Gm14957 | 0.0000 | No |
| 17512 | Gm14964 | 0.0000 | No |
| 17513 | Gm14965 | 0.0000 | No |
| 17514 | Gm14966 | 0.0000 | No |
| 17515 | Gm14967 | 0.0000 | No |
| 17516 | Gm14968 | 0.0000 | No |
| 17517 | Gm14971 | 0.0000 | No |
| 17518 | Gm14972 | 0.0000 | No |
| 17519 | Gm14973 | 0.0000 | No |
| 17520 | Gm14974 | 0.0000 | No |
| 17521 | Gm14975 | 0.0000 | No |
| 17522 | Gm14976 | 0.0000 | No |
| 17523 | Gm14977 | 0.0000 | No |

|       |         |        |    |
|-------|---------|--------|----|
| 17524 | Gm14978 | 0.0000 | No |
| 17525 | Gm14979 | 0.0000 | No |
| 17526 | Gm14980 | 0.0000 | No |
| 17527 | Gm14981 | 0.0000 | No |
| 17528 | Gm14982 | 0.0000 | No |
| 17529 | Gm14983 | 0.0000 | No |
| 17530 | Gm14984 | 0.0000 | No |
| 17531 | Gm14985 | 0.0000 | No |
| 17532 | Gm14986 | 0.0000 | No |
| 17533 | Gm14987 | 0.0000 | No |
| 17534 | Gm14988 | 0.0000 | No |
| 17535 | Gm14989 | 0.0000 | No |
| 17536 | Gm14990 | 0.0000 | No |
| 17537 | Gm14991 | 0.0000 | No |
| 17538 | Gm14992 | 0.0000 | No |
| 17539 | Gm14993 | 0.0000 | No |
| 17540 | Gm14995 | 0.0000 | No |
| 17541 | Gm14996 | 0.0000 | No |
| 17542 | Gm14997 | 0.0000 | No |
| 17543 | Gm14998 | 0.0000 | No |
| 17544 | Gm14999 | 0.0000 | No |
| 17545 | Gm15000 | 0.0000 | No |
| 17546 | Gm15001 | 0.0000 | No |
| 17547 | Gm15002 | 0.0000 | No |
| 17548 | Gm15003 | 0.0000 | No |
| 17549 | Gm15004 | 0.0000 | No |
| 17550 | Gm15005 | 0.0000 | No |
| 17551 | Gm15007 | 0.0000 | No |
| 17552 | Gm15008 | 0.0000 | No |
| 17553 | Gm15009 | 0.0000 | No |
| 17554 | Gm15010 | 0.0000 | No |
| 17555 | Gm15011 | 0.0000 | No |
| 17556 | Gm15012 | 0.0000 | No |
| 17557 | Gm15013 | 0.0000 | No |
| 17558 | Gm15014 | 0.0000 | No |
| 17559 | Gm15015 | 0.0000 | No |
| 17560 | Gm15016 | 0.0000 | No |
| 17561 | Gm15017 | 0.0000 | No |
| 17562 | Gm15018 | 0.0000 | No |
| 17563 | Gm15019 | 0.0000 | No |
| 17564 | Gm15020 | 0.0000 | No |
| 17565 | Gm15021 | 0.0000 | No |
| 17566 | Gm15022 | 0.0000 | No |
| 17567 | Gm15023 | 0.0000 | No |
| 17568 | Gm15025 | 0.0000 | No |
| 17569 | Gm15026 | 0.0000 | No |

|       |         |        |    |
|-------|---------|--------|----|
| 17570 | Gm15027 | 0.0000 | No |
| 17571 | Gm15028 | 0.0000 | No |
| 17572 | Gm15029 | 0.0000 | No |
| 17573 | Gm15030 | 0.0000 | No |
| 17574 | Gm15031 | 0.0000 | No |
| 17575 | Gm15032 | 0.0000 | No |
| 17576 | Gm15034 | 0.0000 | No |
| 17577 | Gm15037 | 0.0000 | No |
| 17578 | Gm15038 | 0.0000 | No |
| 17579 | Gm15039 | 0.0000 | No |
| 17580 | Gm15040 | 0.0000 | No |
| 17581 | Gm15041 | 0.0000 | No |
| 17582 | Gm15042 | 0.0000 | No |
| 17583 | Gm15043 | 0.0000 | No |
| 17584 | Gm15044 | 0.0000 | No |
| 17585 | Gm15045 | 0.0000 | No |
| 17586 | Gm15046 | 0.0000 | No |
| 17587 | Gm15047 | 0.0000 | No |
| 17588 | Gm15048 | 0.0000 | No |
| 17589 | Gm15049 | 0.0000 | No |
| 17590 | Gm15050 | 0.0000 | No |
| 17591 | Gm15054 | 0.0000 | No |
| 17592 | Gm15057 | 0.0000 | No |
| 17593 | Gm15058 | 0.0000 | No |
| 17594 | Gm15060 | 0.0000 | No |
| 17595 | Gm15061 | 0.0000 | No |
| 17596 | Gm15062 | 0.0000 | No |
| 17597 | Gm15063 | 0.0000 | No |
| 17598 | Gm15066 | 0.0000 | No |
| 17599 | Gm15067 | 0.0000 | No |
| 17600 | Gm15068 | 0.0000 | No |
| 17601 | Gm15069 | 0.0000 | No |
| 17602 | Gm15071 | 0.0000 | No |
| 17603 | Gm15073 | 0.0000 | No |
| 17604 | Gm15074 | 0.0000 | No |
| 17605 | Gm15076 | 0.0000 | No |
| 17606 | Gm15077 | 0.0000 | No |
| 17607 | Gm15078 | 0.0000 | No |
| 17608 | Gm15079 | 0.0000 | No |
| 17609 | Gm15080 | 0.0000 | No |
| 17610 | Gm15081 | 0.0000 | No |
| 17611 | Gm15082 | 0.0000 | No |
| 17612 | Gm15084 | 0.0000 | No |
| 17613 | Gm15085 | 0.0000 | No |
| 17614 | Gm15086 | 0.0000 | No |
| 17615 | Gm15087 | 0.0000 | No |

|       |         |        |    |
|-------|---------|--------|----|
| 17616 | Gm15088 | 0.0000 | No |
| 17617 | Gm15089 | 0.0000 | No |
| 17618 | Gm15090 | 0.0000 | No |
| 17619 | Gm15091 | 0.0000 | No |
| 17620 | Gm15092 | 0.0000 | No |
| 17621 | Gm15093 | 0.0000 | No |
| 17622 | Gm15094 | 0.0000 | No |
| 17623 | Gm15095 | 0.0000 | No |
| 17624 | Gm15096 | 0.0000 | No |
| 17625 | Gm15097 | 0.0000 | No |
| 17626 | Gm15098 | 0.0000 | No |
| 17627 | Gm15099 | 0.0000 | No |
| 17628 | Gm15100 | 0.0000 | No |
| 17629 | Gm15101 | 0.0000 | No |
| 17630 | Gm15102 | 0.0000 | No |
| 17631 | Gm15103 | 0.0000 | No |
| 17632 | Gm15104 | 0.0000 | No |
| 17633 | Gm15105 | 0.0000 | No |
| 17634 | Gm15106 | 0.0000 | No |
| 17635 | Gm15107 | 0.0000 | No |
| 17636 | Gm15108 | 0.0000 | No |
| 17637 | Gm15109 | 0.0000 | No |
| 17638 | Gm15110 | 0.0000 | No |
| 17639 | Gm15111 | 0.0000 | No |
| 17640 | Gm15112 | 0.0000 | No |
| 17641 | Gm15113 | 0.0000 | No |
| 17642 | Gm15114 | 0.0000 | No |
| 17643 | Gm15115 | 0.0000 | No |
| 17644 | Gm15116 | 0.0000 | No |
| 17645 | Gm15122 | 0.0000 | No |
| 17646 | Gm15123 | 0.0000 | No |
| 17647 | Gm15124 | 0.0000 | No |
| 17648 | Gm15125 | 0.0000 | No |
| 17649 | Gm15126 | 0.0000 | No |
| 17650 | Gm15127 | 0.0000 | No |
| 17651 | Gm15128 | 0.0000 | No |
| 17652 | Gm15129 | 0.0000 | No |
| 17653 | Gm15130 | 0.0000 | No |
| 17654 | Gm15131 | 0.0000 | No |
| 17655 | Gm15132 | 0.0000 | No |
| 17656 | Gm15133 | 0.0000 | No |
| 17657 | Gm15136 | 0.0000 | No |
| 17658 | Gm15137 | 0.0000 | No |
| 17659 | Gm15138 | 0.0000 | No |
| 17660 | Gm15140 | 0.0000 | No |
| 17661 | Gm15141 | 0.0000 | No |



|       |         |        |    |
|-------|---------|--------|----|
| 17662 | Gm15142 | 0.0000 | No |
| 17663 | Gm15143 | 0.0000 | No |
| 17664 | Gm15147 | 0.0000 | No |
| 17665 | Gm15148 | 0.0000 | No |
| 17666 | Gm15149 | 0.0000 | No |
| 17667 | Gm15151 | 0.0000 | No |
| 17668 | Gm15152 | 0.0000 | No |
| 17669 | Gm15153 | 0.0000 | No |
| 17670 | Gm15154 | 0.0000 | No |
| 17671 | Gm15156 | 0.0000 | No |
| 17672 | Gm15157 | 0.0000 | No |
| 17673 | Gm15158 | 0.0000 | No |
| 17674 | Gm15159 | 0.0000 | No |
| 17675 | Gm15162 | 0.0000 | No |
| 17676 | Gm15163 | 0.0000 | No |
| 17677 | Gm15164 | 0.0000 | No |
| 17678 | Gm15165 | 0.0000 | No |
| 17679 | Gm15166 | 0.0000 | No |
| 17680 | Gm15167 | 0.0000 | No |
| 17681 | Gm15168 | 0.0000 | No |
| 17682 | Gm15169 | 0.0000 | No |
| 17683 | Gm15170 | 0.0000 | No |
| 17684 | Gm15171 | 0.0000 | No |
| 17685 | Gm15172 | 0.0000 | No |
| 17686 | Gm15173 | 0.0000 | No |
| 17687 | Gm15175 | 0.0000 | No |
| 17688 | Gm15176 | 0.0000 | No |
| 17689 | Gm15177 | 0.0000 | No |
| 17690 | Gm15178 | 0.0000 | No |
| 17691 | Gm15179 | 0.0000 | No |
| 17692 | Gm15180 | 0.0000 | No |
| 17693 | Gm15181 | 0.0000 | No |
| 17694 | Gm15183 | 0.0000 | No |
| 17695 | Gm15185 | 0.0000 | No |
| 17696 | Gm15186 | 0.0000 | No |
| 17697 | Gm15187 | 0.0000 | No |
| 17698 | Gm15188 | 0.0000 | No |
| 17699 | Gm15190 | 0.0000 | No |
| 17700 | Gm15191 | 0.0000 | No |
| 17701 | Gm15192 | 0.0000 | No |
| 17702 | Gm15193 | 0.0000 | No |
| 17703 | Gm15194 | 0.0000 | No |
| 17704 | Gm15195 | 0.0000 | No |
| 17705 | Gm15196 | 0.0000 | No |
| 17706 | Gm15197 | 0.0000 | No |
| 17707 | Gm15199 | 0.0000 | No |

|       |         |        |    |
|-------|---------|--------|----|
| 17708 | Gm15200 | 0.0000 | No |
| 17709 | Gm15202 | 0.0000 | No |
| 17710 | Gm15203 | 0.0000 | No |
| 17711 | Gm15204 | 0.0000 | No |
| 17712 | Gm15205 | 0.0000 | No |
| 17713 | Gm15206 | 0.0000 | No |
| 17714 | Gm15207 | 0.0000 | No |
| 17715 | Gm15208 | 0.0000 | No |
| 17716 | Gm15209 | 0.0000 | No |
| 17717 | Gm15210 | 0.0000 | No |
| 17718 | Gm15211 | 0.0000 | No |
| 17719 | Gm15212 | 0.0000 | No |
| 17720 | Gm15213 | 0.0000 | No |
| 17721 | Gm15214 | 0.0000 | No |
| 17722 | Gm15215 | 0.0000 | No |
| 17723 | Gm15216 | 0.0000 | No |
| 17724 | Gm15217 | 0.0000 | No |
| 17725 | Gm15220 | 0.0000 | No |
| 17726 | Gm15222 | 0.0000 | No |
| 17727 | Gm15223 | 0.0000 | No |
| 17728 | Gm15224 | 0.0000 | No |
| 17729 | Gm15225 | 0.0000 | No |
| 17730 | Gm15226 | 0.0000 | No |
| 17731 | Gm15227 | 0.0000 | No |
| 17732 | Gm15228 | 0.0000 | No |
| 17733 | Gm15229 | 0.0000 | No |
| 17734 | Gm15230 | 0.0000 | No |
| 17735 | Gm15231 | 0.0000 | No |
| 17736 | Gm15232 | 0.0000 | No |
| 17737 | Gm15233 | 0.0000 | No |
| 17738 | Gm15235 | 0.0000 | No |
| 17739 | Gm15236 | 0.0000 | No |
| 17740 | Gm15237 | 0.0000 | No |
| 17741 | Gm15239 | 0.0000 | No |
| 17742 | Gm15240 | 0.0000 | No |
| 17743 | Gm15242 | 0.0000 | No |
| 17744 | Gm15243 | 0.0000 | No |
| 17745 | Gm15244 | 0.0000 | No |
| 17746 | Gm15245 | 0.0000 | No |
| 17747 | Gm15246 | 0.0000 | No |
| 17748 | Gm15247 | 0.0000 | No |
| 17749 | Gm15251 | 0.0000 | No |
| 17750 | Gm15252 | 0.0000 | No |
| 17751 | Gm15254 | 0.0000 | No |
| 17752 | Gm15256 | 0.0000 | No |
| 17753 | Gm15257 | 0.0000 | No |

|       |         |        |    |
|-------|---------|--------|----|
| 17754 | Gm15258 | 0.0000 | No |
| 17755 | Gm15259 | 0.0000 | No |
| 17756 | Gm15260 | 0.0000 | No |
| 17757 | Gm15261 | 0.0000 | No |
| 17758 | Gm15262 | 0.0000 | No |
| 17759 | Gm15263 | 0.0000 | No |
| 17760 | Gm15264 | 0.0000 | No |
| 17761 | Gm15265 | 0.0000 | No |
| 17762 | Gm15266 | 0.0000 | No |
| 17763 | Gm15267 | 0.0000 | No |
| 17764 | Gm1527  | 0.0000 | No |
| 17765 | Gm15270 | 0.0000 | No |
| 17766 | Gm15272 | 0.0000 | No |
| 17767 | Gm15273 | 0.0000 | No |
| 17768 | Gm15274 | 0.0000 | No |
| 17769 | Gm15275 | 0.0000 | No |
| 17770 | Gm15276 | 0.0000 | No |
| 17771 | Gm15279 | 0.0000 | No |
| 17772 | Gm15280 | 0.0000 | No |
| 17773 | Gm15281 | 0.0000 | No |
| 17774 | Gm15282 | 0.0000 | No |
| 17775 | Gm15283 | 0.0000 | No |
| 17776 | Gm15288 | 0.0000 | No |
| 17777 | Gm15289 | 0.0000 | No |
| 17778 | Gm15290 | 0.0000 | No |
| 17779 | Gm15292 | 0.0000 | No |
| 17780 | Gm15294 | 0.0000 | No |
| 17781 | Gm15295 | 0.0000 | No |
| 17782 | Gm15297 | 0.0000 | No |
| 17783 | Gm15298 | 0.0000 | No |
| 17784 | Gm15300 | 0.0000 | No |
| 17785 | Gm15302 | 0.0000 | No |
| 17786 | Gm15303 | 0.0000 | No |
| 17787 | Gm15304 | 0.0000 | No |
| 17788 | Gm15305 | 0.0000 | No |
| 17789 | Gm15309 | 0.0000 | No |
| 17790 | Gm15310 | 0.0000 | No |
| 17791 | Gm15311 | 0.0000 | No |
| 17792 | Gm15312 | 0.0000 | No |
| 17793 | Gm15313 | 0.0000 | No |
| 17794 | Gm15314 | 0.0000 | No |
| 17795 | Gm15316 | 0.0000 | No |
| 17796 | Gm15317 | 0.0000 | No |
| 17797 | Gm15318 | 0.0000 | No |
| 17798 | Gm15319 | 0.0000 | No |
| 17799 | Gm15320 | 0.0000 | No |

|       |         |        |    |
|-------|---------|--------|----|
| 17800 | Gm15321 | 0.0000 | No |
| 17801 | Gm15322 | 0.0000 | No |
| 17802 | Gm15324 | 0.0000 | No |
| 17803 | Gm15325 | 0.0000 | No |
| 17804 | Gm15326 | 0.0000 | No |
| 17805 | Gm15327 | 0.0000 | No |
| 17806 | Gm15328 | 0.0000 | No |
| 17807 | Gm15329 | 0.0000 | No |
| 17808 | Gm15332 | 0.0000 | No |
| 17809 | Gm15333 | 0.0000 | No |
| 17810 | Gm15334 | 0.0000 | No |
| 17811 | Gm15335 | 0.0000 | No |
| 17812 | Gm15336 | 0.0000 | No |
| 17813 | Gm15337 | 0.0000 | No |
| 17814 | Gm15338 | 0.0000 | No |
| 17815 | Gm15339 | 0.0000 | No |
| 17816 | Gm15340 | 0.0000 | No |
| 17817 | Gm15341 | 0.0000 | No |
| 17818 | Gm15342 | 0.0000 | No |
| 17819 | Gm15343 | 0.0000 | No |
| 17820 | Gm15344 | 0.0000 | No |
| 17821 | Gm15345 | 0.0000 | No |
| 17822 | Gm15346 | 0.0000 | No |
| 17823 | Gm15347 | 0.0000 | No |
| 17824 | Gm15348 | 0.0000 | No |
| 17825 | Gm15350 | 0.0000 | No |
| 17826 | Gm15351 | 0.0000 | No |
| 17827 | Gm15352 | 0.0000 | No |
| 17828 | Gm15354 | 0.0000 | No |
| 17829 | Gm15355 | 0.0000 | No |
| 17830 | Gm15356 | 0.0000 | No |
| 17831 | Gm15357 | 0.0000 | No |
| 17832 | Gm15358 | 0.0000 | No |
| 17833 | Gm15359 | 0.0000 | No |
| 17834 | Gm15361 | 0.0000 | No |
| 17835 | Gm15363 | 0.0000 | No |
| 17836 | Gm15364 | 0.0000 | No |
| 17837 | Gm15365 | 0.0000 | No |
| 17838 | Gm15366 | 0.0000 | No |
| 17839 | Gm15367 | 0.0000 | No |
| 17840 | Gm15368 | 0.0000 | No |
| 17841 | Gm15370 | 0.0000 | No |
| 17842 | Gm15371 | 0.0000 | No |
| 17843 | Gm15373 | 0.0000 | No |
| 17844 | Gm15374 | 0.0000 | No |
| 17845 | Gm15376 | 0.0000 | No |

|       |         |        |    |
|-------|---------|--------|----|
| 17846 | Gm15377 | 0.0000 | No |
| 17847 | Gm15378 | 0.0000 | No |
| 17848 | Gm15379 | 0.0000 | No |
| 17849 | Gm15383 | 0.0000 | No |
| 17850 | Gm15384 | 0.0000 | No |
| 17851 | Gm15385 | 0.0000 | No |
| 17852 | Gm15387 | 0.0000 | No |
| 17853 | Gm15388 | 0.0000 | No |
| 17854 | Gm15389 | 0.0000 | No |
| 17855 | Gm15390 | 0.0000 | No |
| 17856 | Gm15391 | 0.0000 | No |
| 17857 | Gm15392 | 0.0000 | No |
| 17858 | Gm15393 | 0.0000 | No |
| 17859 | Gm15394 | 0.0000 | No |
| 17860 | Gm15395 | 0.0000 | No |
| 17861 | Gm15396 | 0.0000 | No |
| 17862 | Gm15397 | 0.0000 | No |
| 17863 | Gm15398 | 0.0000 | No |
| 17864 | Gm15399 | 0.0000 | No |
| 17865 | Gm15400 | 0.0000 | No |
| 17866 | Gm15401 | 0.0000 | No |
| 17867 | Gm15403 | 0.0000 | No |
| 17868 | Gm15408 | 0.0000 | No |
| 17869 | Gm15409 | 0.0000 | No |
| 17870 | Gm15411 | 0.0000 | No |
| 17871 | Gm15413 | 0.0000 | No |
| 17872 | Gm15414 | 0.0000 | No |
| 17873 | Gm15416 | 0.0000 | No |
| 17874 | Gm15417 | 0.0000 | No |
| 17875 | Gm15419 | 0.0000 | No |
| 17876 | Gm15420 | 0.0000 | No |
| 17877 | Gm15421 | 0.0000 | No |
| 17878 | Gm15423 | 0.0000 | No |
| 17879 | Gm15425 | 0.0000 | No |
| 17880 | Gm15426 | 0.0000 | No |
| 17881 | Gm15427 | 0.0000 | No |
| 17882 | Gm15428 | 0.0000 | No |
| 17883 | Gm15429 | 0.0000 | No |
| 17884 | Gm15432 | 0.0000 | No |
| 17885 | Gm15433 | 0.0000 | No |
| 17886 | Gm15440 | 0.0000 | No |
| 17887 | Gm15441 | 0.0000 | No |
| 17888 | Gm15442 | 0.0000 | No |
| 17889 | Gm15443 | 0.0000 | No |
| 17890 | Gm15444 | 0.0000 | No |
| 17891 | Gm15446 | 0.0000 | No |

|       |         |        |    |
|-------|---------|--------|----|
| 17892 | Gm15452 | 0.0000 | No |
| 17893 | Gm15453 | 0.0000 | No |
| 17894 | Gm15454 | 0.0000 | No |
| 17895 | Gm15455 | 0.0000 | No |
| 17896 | Gm15458 | 0.0000 | No |
| 17897 | Gm15459 | 0.0000 | No |
| 17898 | Gm15460 | 0.0000 | No |
| 17899 | Gm15461 | 0.0000 | No |
| 17900 | Gm15462 | 0.0000 | No |
| 17901 | Gm15464 | 0.0000 | No |
| 17902 | Gm15465 | 0.0000 | No |
| 17903 | Gm15466 | 0.0000 | No |
| 17904 | Gm15467 | 0.0000 | No |
| 17905 | Gm15469 | 0.0000 | No |
| 17906 | Gm15470 | 0.0000 | No |
| 17907 | Gm15471 | 0.0000 | No |
| 17908 | Gm15472 | 0.0000 | No |
| 17909 | Gm15473 | 0.0000 | No |
| 17910 | Gm15475 | 0.0000 | No |
| 17911 | Gm15476 | 0.0000 | No |
| 17912 | Gm15477 | 0.0000 | No |
| 17913 | Gm15478 | 0.0000 | No |
| 17914 | Gm15479 | 0.0000 | No |
| 17915 | Gm15480 | 0.0000 | No |
| 17916 | Gm15481 | 0.0000 | No |
| 17917 | Gm15482 | 0.0000 | No |
| 17918 | Gm15483 | 0.0000 | No |
| 17919 | Gm15484 | 0.0000 | No |
| 17920 | Gm15485 | 0.0000 | No |
| 17921 | Gm15486 | 0.0000 | No |
| 17922 | Gm15487 | 0.0000 | No |
| 17923 | Gm15488 | 0.0000 | No |
| 17924 | Gm15489 | 0.0000 | No |
| 17925 | Gm15490 | 0.0000 | No |
| 17926 | Gm15491 | 0.0000 | No |
| 17927 | Gm15492 | 0.0000 | No |
| 17928 | Gm15493 | 0.0000 | No |
| 17929 | Gm15496 | 0.0000 | No |
| 17930 | Gm15497 | 0.0000 | No |
| 17931 | Gm15498 | 0.0000 | No |
| 17932 | Gm15500 | 0.0000 | No |
| 17933 | Gm15501 | 0.0000 | No |
| 17934 | Gm15502 | 0.0000 | No |
| 17935 | Gm15503 | 0.0000 | No |
| 17936 | Gm15504 | 0.0000 | No |
| 17937 | Gm15506 | 0.0000 | No |

|       |         |        |    |
|-------|---------|--------|----|
| 17938 | Gm15507 | 0.0000 | No |
| 17939 | Gm15508 | 0.0000 | No |
| 17940 | Gm15509 | 0.0000 | No |
| 17941 | Gm15510 | 0.0000 | No |
| 17942 | Gm15511 | 0.0000 | No |
| 17943 | Gm15512 | 0.0000 | No |
| 17944 | Gm15513 | 0.0000 | No |
| 17945 | Gm15515 | 0.0000 | No |
| 17946 | Gm15516 | 0.0000 | No |
| 17947 | Gm15517 | 0.0000 | No |
| 17948 | Gm15518 | 0.0000 | No |
| 17949 | Gm15519 | 0.0000 | No |
| 17950 | Gm15521 | 0.0000 | No |
| 17951 | Gm15522 | 0.0000 | No |
| 17952 | Gm15523 | 0.0000 | No |
| 17953 | Gm15524 | 0.0000 | No |
| 17954 | Gm15529 | 0.0000 | No |
| 17955 | Gm1553  | 0.0000 | No |
| 17956 | Gm15530 | 0.0000 | No |
| 17957 | Gm15531 | 0.0000 | No |
| 17958 | Gm15532 | 0.0000 | No |
| 17959 | Gm15533 | 0.0000 | No |
| 17960 | Gm15534 | 0.0000 | No |
| 17961 | Gm15535 | 0.0000 | No |
| 17962 | Gm15536 | 0.0000 | No |
| 17963 | Gm15537 | 0.0000 | No |
| 17964 | Gm15539 | 0.0000 | No |
| 17965 | Gm15540 | 0.0000 | No |
| 17966 | Gm15541 | 0.0000 | No |
| 17967 | Gm15542 | 0.0000 | No |
| 17968 | Gm15543 | 0.0000 | No |
| 17969 | Gm15545 | 0.0000 | No |
| 17970 | Gm15546 | 0.0000 | No |
| 17971 | Gm15547 | 0.0000 | No |
| 17972 | Gm15549 | 0.0000 | No |
| 17973 | Gm15550 | 0.0000 | No |
| 17974 | Gm15551 | 0.0000 | No |
| 17975 | Gm15555 | 0.0000 | No |
| 17976 | Gm15556 | 0.0000 | No |
| 17977 | Gm15557 | 0.0000 | No |
| 17978 | Gm15558 | 0.0000 | No |
| 17979 | Gm15559 | 0.0000 | No |
| 17980 | Gm15560 | 0.0000 | No |
| 17981 | Gm15561 | 0.0000 | No |
| 17982 | Gm15562 | 0.0000 | No |
| 17983 | Gm15563 | 0.0000 | No |

|       |         |        |    |
|-------|---------|--------|----|
| 17984 | Gm15564 | 0.0000 | No |
| 17985 | Gm15565 | 0.0000 | No |
| 17986 | Gm15567 | 0.0000 | No |
| 17987 | Gm15568 | 0.0000 | No |
| 17988 | Gm15569 | 0.0000 | No |
| 17989 | Gm15570 | 0.0000 | No |
| 17990 | Gm15571 | 0.0000 | No |
| 17991 | Gm15572 | 0.0000 | No |
| 17992 | Gm15573 | 0.0000 | No |
| 17993 | Gm15574 | 0.0000 | No |
| 17994 | Gm15576 | 0.0000 | No |
| 17995 | Gm15577 | 0.0000 | No |
| 17996 | Gm15578 | 0.0000 | No |
| 17997 | Gm15579 | 0.0000 | No |
| 17998 | Gm15580 | 0.0000 | No |
| 17999 | Gm15581 | 0.0000 | No |
| 18000 | Gm15582 | 0.0000 | No |
| 18001 | Gm15583 | 0.0000 | No |
| 18002 | Gm15584 | 0.0000 | No |
| 18003 | Gm15585 | 0.0000 | No |
| 18004 | Gm15586 | 0.0000 | No |
| 18005 | Gm15587 | 0.0000 | No |
| 18006 | Gm15589 | 0.0000 | No |
| 18007 | Gm15590 | 0.0000 | No |
| 18008 | Gm15591 | 0.0000 | No |
| 18009 | Gm15593 | 0.0000 | No |
| 18010 | Gm15594 | 0.0000 | No |
| 18011 | Gm15595 | 0.0000 | No |
| 18012 | Gm15596 | 0.0000 | No |
| 18013 | Gm15597 | 0.0000 | No |
| 18014 | Gm15598 | 0.0000 | No |
| 18015 | Gm15599 | 0.0000 | No |
| 18016 | Gm156   | 0.0000 | No |
| 18017 | Gm15600 | 0.0000 | No |
| 18018 | Gm15601 | 0.0000 | No |
| 18019 | Gm15602 | 0.0000 | No |
| 18020 | Gm15603 | 0.0000 | No |
| 18021 | Gm15604 | 0.0000 | No |
| 18022 | Gm15607 | 0.0000 | No |
| 18023 | Gm15608 | 0.0000 | No |
| 18024 | Gm15609 | 0.0000 | No |
| 18025 | Gm15610 | 0.0000 | No |
| 18026 | Gm15611 | 0.0000 | No |
| 18027 | Gm15612 | 0.0000 | No |
| 18028 | Gm15613 | 0.0000 | No |
| 18029 | Gm15614 | 0.0000 | No |



|       |         |        |    |
|-------|---------|--------|----|
| 18030 | Gm15615 | 0.0000 | No |
| 18031 | Gm15616 | 0.0000 | No |
| 18032 | Gm15619 | 0.0000 | No |
| 18033 | Gm15620 | 0.0000 | No |
| 18034 | Gm15621 | 0.0000 | No |
| 18035 | Gm15624 | 0.0000 | No |
| 18036 | Gm15625 | 0.0000 | No |
| 18037 | Gm15626 | 0.0000 | No |
| 18038 | Gm15627 | 0.0000 | No |
| 18039 | Gm15628 | 0.0000 | No |
| 18040 | Gm15629 | 0.0000 | No |
| 18041 | Gm15631 | 0.0000 | No |
| 18042 | Gm15632 | 0.0000 | No |
| 18043 | Gm15634 | 0.0000 | No |
| 18044 | Gm15636 | 0.0000 | No |
| 18045 | Gm15637 | 0.0000 | No |
| 18046 | Gm15638 | 0.0000 | No |
| 18047 | Gm15640 | 0.0000 | No |
| 18048 | Gm15641 | 0.0000 | No |
| 18049 | Gm15642 | 0.0000 | No |
| 18050 | Gm15643 | 0.0000 | No |
| 18051 | Gm15644 | 0.0000 | No |
| 18052 | Gm15645 | 0.0000 | No |
| 18053 | Gm15646 | 0.0000 | No |
| 18054 | Gm15647 | 0.0000 | No |
| 18055 | Gm15648 | 0.0000 | No |
| 18056 | Gm15651 | 0.0000 | No |
| 18057 | Gm15653 | 0.0000 | No |
| 18058 | Gm15654 | 0.0000 | No |
| 18059 | Gm15655 | 0.0000 | No |
| 18060 | Gm15656 | 0.0000 | No |
| 18061 | Gm15657 | 0.0000 | No |
| 18062 | Gm15659 | 0.0000 | No |
| 18063 | Gm15661 | 0.0000 | No |
| 18064 | Gm15662 | 0.0000 | No |
| 18065 | Gm15663 | 0.0000 | No |
| 18066 | Gm15664 | 0.0000 | No |
| 18067 | Gm15665 | 0.0000 | No |
| 18068 | Gm15666 | 0.0000 | No |
| 18069 | Gm15667 | 0.0000 | No |
| 18070 | Gm15668 | 0.0000 | No |
| 18071 | Gm15669 | 0.0000 | No |
| 18072 | Gm15671 | 0.0000 | No |
| 18073 | Gm15672 | 0.0000 | No |
| 18074 | Gm15674 | 0.0000 | No |
| 18075 | Gm15675 | 0.0000 | No |

|       |         |        |    |
|-------|---------|--------|----|
| 18076 | Gm15677 | 0.0000 | No |
| 18077 | Gm15678 | 0.0000 | No |
| 18078 | Gm15679 | 0.0000 | No |
| 18079 | Gm15680 | 0.0000 | No |
| 18080 | Gm15681 | 0.0000 | No |
| 18081 | Gm15682 | 0.0000 | No |
| 18082 | Gm15684 | 0.0000 | No |
| 18083 | Gm15687 | 0.0000 | No |
| 18084 | Gm15689 | 0.0000 | No |
| 18085 | Gm15690 | 0.0000 | No |
| 18086 | Gm15691 | 0.0000 | No |
| 18087 | Gm15692 | 0.0000 | No |
| 18088 | Gm15694 | 0.0000 | No |
| 18089 | Gm15696 | 0.0000 | No |
| 18090 | Gm15697 | 0.0000 | No |
| 18091 | Gm15698 | 0.0000 | No |
| 18092 | Gm15699 | 0.0000 | No |
| 18093 | Gm15700 | 0.0000 | No |
| 18094 | Gm15701 | 0.0000 | No |
| 18095 | Gm15702 | 0.0000 | No |
| 18096 | Gm15703 | 0.0000 | No |
| 18097 | Gm15704 | 0.0000 | No |
| 18098 | Gm15706 | 0.0000 | No |
| 18099 | Gm15707 | 0.0000 | No |
| 18100 | Gm15708 | 0.0000 | No |
| 18101 | Gm15709 | 0.0000 | No |
| 18102 | Gm15710 | 0.0000 | No |
| 18103 | Gm15711 | 0.0000 | No |
| 18104 | Gm15712 | 0.0000 | No |
| 18105 | Gm15713 | 0.0000 | No |
| 18106 | Gm15714 | 0.0000 | No |
| 18107 | Gm15715 | 0.0000 | No |
| 18108 | Gm15716 | 0.0000 | No |
| 18109 | Gm15718 | 0.0000 | No |
| 18110 | Gm15719 | 0.0000 | No |
| 18111 | Gm15720 | 0.0000 | No |
| 18112 | Gm15722 | 0.0000 | No |
| 18113 | Gm15723 | 0.0000 | No |
| 18114 | Gm15725 | 0.0000 | No |
| 18115 | Gm15726 | 0.0000 | No |
| 18116 | Gm15727 | 0.0000 | No |
| 18117 | Gm15728 | 0.0000 | No |
| 18118 | Gm15730 | 0.0000 | No |
| 18119 | Gm15731 | 0.0000 | No |
| 18120 | Gm15732 | 0.0000 | No |
| 18121 | Gm15733 | 0.0000 | No |

|       |         |        |    |
|-------|---------|--------|----|
| 18122 | Gm15734 | 0.0000 | No |
| 18123 | Gm15735 | 0.0000 | No |
| 18124 | Gm15736 | 0.0000 | No |
| 18125 | Gm15737 | 0.0000 | No |
| 18126 | Gm15738 | 0.0000 | No |
| 18127 | Gm15739 | 0.0000 | No |
| 18128 | Gm15740 | 0.0000 | No |
| 18129 | Gm15741 | 0.0000 | No |
| 18130 | Gm15745 | 0.0000 | No |
| 18131 | Gm15747 | 0.0000 | No |
| 18132 | Gm15749 | 0.0000 | No |
| 18133 | Gm15750 | 0.0000 | No |
| 18134 | Gm15751 | 0.0000 | No |
| 18135 | Gm15752 | 0.0000 | No |
| 18136 | Gm15753 | 0.0000 | No |
| 18137 | Gm15754 | 0.0000 | No |
| 18138 | Gm15756 | 0.0000 | No |
| 18139 | Gm15758 | 0.0000 | No |
| 18140 | Gm15759 | 0.0000 | No |
| 18141 | Gm15760 | 0.0000 | No |
| 18142 | Gm15763 | 0.0000 | No |
| 18143 | Gm15764 | 0.0000 | No |
| 18144 | Gm15766 | 0.0000 | No |
| 18145 | Gm15767 | 0.0000 | No |
| 18146 | Gm15770 | 0.0000 | No |
| 18147 | Gm15772 | 0.0000 | No |
| 18148 | Gm15773 | 0.0000 | No |
| 18149 | Gm15774 | 0.0000 | No |
| 18150 | Gm15775 | 0.0000 | No |
| 18151 | Gm15776 | 0.0000 | No |
| 18152 | Gm15777 | 0.0000 | No |
| 18153 | Gm15778 | 0.0000 | No |
| 18154 | Gm15779 | 0.0000 | No |
| 18155 | Gm15780 | 0.0000 | No |
| 18156 | Gm15781 | 0.0000 | No |
| 18157 | Gm15782 | 0.0000 | No |
| 18158 | Gm15784 | 0.0000 | No |
| 18159 | Gm15786 | 0.0000 | No |
| 18160 | Gm15787 | 0.0000 | No |
| 18161 | Gm15788 | 0.0000 | No |
| 18162 | Gm15789 | 0.0000 | No |
| 18163 | Gm15790 | 0.0000 | No |
| 18164 | Gm15793 | 0.0000 | No |
| 18165 | Gm15794 | 0.0000 | No |
| 18166 | Gm15795 | 0.0000 | No |
| 18167 | Gm15796 | 0.0000 | No |

|       |         |        |    |
|-------|---------|--------|----|
| 18168 | Gm15798 | 0.0000 | No |
| 18169 | Gm15800 | 0.0000 | No |
| 18170 | Gm15801 | 0.0000 | No |
| 18171 | Gm15803 | 0.0000 | No |
| 18172 | Gm15806 | 0.0000 | No |
| 18173 | Gm15807 | 0.0000 | No |
| 18174 | Gm15808 | 0.0000 | No |
| 18175 | Gm15809 | 0.0000 | No |
| 18176 | Gm15812 | 0.0000 | No |
| 18177 | Gm15813 | 0.0000 | No |
| 18178 | Gm15815 | 0.0000 | No |
| 18179 | Gm15816 | 0.0000 | No |
| 18180 | Gm15818 | 0.0000 | No |
| 18181 | Gm15819 | 0.0000 | No |
| 18182 | Gm15820 | 0.0000 | No |
| 18183 | Gm15821 | 0.0000 | No |
| 18184 | Gm15823 | 0.0000 | No |
| 18185 | Gm15824 | 0.0000 | No |
| 18186 | Gm15825 | 0.0000 | No |
| 18187 | Gm15826 | 0.0000 | No |
| 18188 | Gm15828 | 0.0000 | No |
| 18189 | Gm15829 | 0.0000 | No |
| 18190 | Gm15831 | 0.0000 | No |
| 18191 | Gm15832 | 0.0000 | No |
| 18192 | Gm15833 | 0.0000 | No |
| 18193 | Gm15834 | 0.0000 | No |
| 18194 | Gm15835 | 0.0000 | No |
| 18195 | Gm15836 | 0.0000 | No |
| 18196 | Gm15839 | 0.0000 | No |
| 18197 | Gm15840 | 0.0000 | No |
| 18198 | Gm15841 | 0.0000 | No |
| 18199 | Gm15842 | 0.0000 | No |
| 18200 | Gm15843 | 0.0000 | No |
| 18201 | Gm15844 | 0.0000 | No |
| 18202 | Gm15845 | 0.0000 | No |
| 18203 | Gm15846 | 0.0000 | No |
| 18204 | Gm15847 | 0.0000 | No |
| 18205 | Gm15849 | 0.0000 | No |
| 18206 | Gm15850 | 0.0000 | No |
| 18207 | Gm15852 | 0.0000 | No |
| 18208 | Gm15853 | 0.0000 | No |
| 18209 | Gm15856 | 0.0000 | No |
| 18210 | Gm15857 | 0.0000 | No |
| 18211 | Gm15859 | 0.0000 | No |
| 18212 | Gm15860 | 0.0000 | No |
| 18213 | Gm15861 | 0.0000 | No |

|       |         |        |    |
|-------|---------|--------|----|
| 18214 | Gm15862 | 0.0000 | No |
| 18215 | Gm15864 | 0.0000 | No |
| 18216 | Gm15866 | 0.0000 | No |
| 18217 | Gm15867 | 0.0000 | No |
| 18218 | Gm15868 | 0.0000 | No |
| 18219 | Gm15869 | 0.0000 | No |
| 18220 | Gm15870 | 0.0000 | No |
| 18221 | Gm15872 | 0.0000 | No |
| 18222 | Gm15873 | 0.0000 | No |
| 18223 | Gm15875 | 0.0000 | No |
| 18224 | Gm15877 | 0.0000 | No |
| 18225 | Gm15878 | 0.0000 | No |
| 18226 | Gm15879 | 0.0000 | No |
| 18227 | Gm15880 | 0.0000 | No |
| 18228 | Gm15882 | 0.0000 | No |
| 18229 | Gm15883 | 0.0000 | No |
| 18230 | Gm15884 | 0.0000 | No |
| 18231 | Gm15885 | 0.0000 | No |
| 18232 | Gm15886 | 0.0000 | No |
| 18233 | Gm15888 | 0.0000 | No |
| 18234 | Gm15889 | 0.0000 | No |
| 18235 | Gm15890 | 0.0000 | No |
| 18236 | Gm15891 | 0.0000 | No |
| 18237 | Gm15892 | 0.0000 | No |
| 18238 | Gm15893 | 0.0000 | No |
| 18239 | Gm15894 | 0.0000 | No |
| 18240 | Gm15895 | 0.0000 | No |
| 18241 | Gm15896 | 0.0000 | No |
| 18242 | Gm15897 | 0.0000 | No |
| 18243 | Gm15898 | 0.0000 | No |
| 18244 | Gm15899 | 0.0000 | No |
| 18245 | Gm15900 | 0.0000 | No |
| 18246 | Gm15901 | 0.0000 | No |
| 18247 | Gm15903 | 0.0000 | No |
| 18248 | Gm15904 | 0.0000 | No |
| 18249 | Gm15905 | 0.0000 | No |
| 18250 | Gm15906 | 0.0000 | No |
| 18251 | Gm15907 | 0.0000 | No |
| 18252 | Gm15908 | 0.0000 | No |
| 18253 | Gm15910 | 0.0000 | No |
| 18254 | Gm15911 | 0.0000 | No |
| 18255 | Gm15912 | 0.0000 | No |
| 18256 | Gm15913 | 0.0000 | No |
| 18257 | Gm15914 | 0.0000 | No |
| 18258 | Gm15915 | 0.0000 | No |
| 18259 | Gm15916 | 0.0000 | No |

|       |         |        |    |
|-------|---------|--------|----|
| 18260 | Gm15917 | 0.0000 | No |
| 18261 | Gm15920 | 0.0000 | No |
| 18262 | Gm15921 | 0.0000 | No |
| 18263 | Gm15922 | 0.0000 | No |
| 18264 | Gm15925 | 0.0000 | No |
| 18265 | Gm15927 | 0.0000 | No |
| 18266 | Gm15928 | 0.0000 | No |
| 18267 | Gm15929 | 0.0000 | No |
| 18268 | Gm15930 | 0.0000 | No |
| 18269 | Gm15931 | 0.0000 | No |
| 18270 | Gm15932 | 0.0000 | No |
| 18271 | Gm15933 | 0.0000 | No |
| 18272 | Gm15934 | 0.0000 | No |
| 18273 | Gm15935 | 0.0000 | No |
| 18274 | Gm15936 | 0.0000 | No |
| 18275 | Gm15937 | 0.0000 | No |
| 18276 | Gm15938 | 0.0000 | No |
| 18277 | Gm15939 | 0.0000 | No |
| 18278 | Gm15940 | 0.0000 | No |
| 18279 | Gm15941 | 0.0000 | No |
| 18280 | Gm15942 | 0.0000 | No |
| 18281 | Gm15943 | 0.0000 | No |
| 18282 | Gm15945 | 0.0000 | No |
| 18283 | Gm15946 | 0.0000 | No |
| 18284 | Gm15947 | 0.0000 | No |
| 18285 | Gm15948 | 0.0000 | No |
| 18286 | Gm15949 | 0.0000 | No |
| 18287 | Gm15950 | 0.0000 | No |
| 18288 | Gm15951 | 0.0000 | No |
| 18289 | Gm15952 | 0.0000 | No |
| 18290 | Gm15953 | 0.0000 | No |
| 18291 | Gm15954 | 0.0000 | No |
| 18292 | Gm15956 | 0.0000 | No |
| 18293 | Gm15957 | 0.0000 | No |
| 18294 | Gm15958 | 0.0000 | No |
| 18295 | Gm15959 | 0.0000 | No |
| 18296 | Gm15962 | 0.0000 | No |
| 18297 | Gm15963 | 0.0000 | No |
| 18298 | Gm15964 | 0.0000 | No |
| 18299 | Gm15965 | 0.0000 | No |
| 18300 | Gm15966 | 0.0000 | No |
| 18301 | Gm15967 | 0.0000 | No |
| 18302 | Gm15968 | 0.0000 | No |
| 18303 | Gm15969 | 0.0000 | No |
| 18304 | Gm15970 | 0.0000 | No |
| 18305 | Gm15971 | 0.0000 | No |

|       |         |        |    |
|-------|---------|--------|----|
| 18306 | Gm15972 | 0.0000 | No |
| 18307 | Gm15974 | 0.0000 | No |
| 18308 | Gm15975 | 0.0000 | No |
| 18309 | Gm15976 | 0.0000 | No |
| 18310 | Gm15978 | 0.0000 | No |
| 18311 | Gm15979 | 0.0000 | No |
| 18312 | Gm15981 | 0.0000 | No |
| 18313 | Gm15982 | 0.0000 | No |
| 18314 | Gm15983 | 0.0000 | No |
| 18315 | Gm15989 | 0.0000 | No |
| 18316 | Gm15990 | 0.0000 | No |
| 18317 | Gm15991 | 0.0000 | No |
| 18318 | Gm15994 | 0.0000 | No |
| 18319 | Gm15995 | 0.0000 | No |
| 18320 | Gm15996 | 0.0000 | No |
| 18321 | Gm15999 | 0.0000 | No |
| 18322 | Gm16000 | 0.0000 | No |
| 18323 | Gm16001 | 0.0000 | No |
| 18324 | Gm16004 | 0.0000 | No |
| 18325 | Gm16005 | 0.0000 | No |
| 18326 | Gm16006 | 0.0000 | No |
| 18327 | Gm16007 | 0.0000 | No |
| 18328 | Gm16010 | 0.0000 | No |
| 18329 | Gm16011 | 0.0000 | No |
| 18330 | Gm16013 | 0.0000 | No |
| 18331 | Gm16014 | 0.0000 | No |
| 18332 | Gm16015 | 0.0000 | No |
| 18333 | Gm16016 | 0.0000 | No |
| 18334 | Gm16017 | 0.0000 | No |
| 18335 | Gm16019 | 0.0000 | No |
| 18336 | Gm16020 | 0.0000 | No |
| 18337 | Gm16021 | 0.0000 | No |
| 18338 | Gm16023 | 0.0000 | No |
| 18339 | Gm16024 | 0.0000 | No |
| 18340 | Gm16025 | 0.0000 | No |
| 18341 | Gm16027 | 0.0000 | No |
| 18342 | Gm16028 | 0.0000 | No |
| 18343 | Gm16029 | 0.0000 | No |
| 18344 | Gm16030 | 0.0000 | No |
| 18345 | Gm16032 | 0.0000 | No |
| 18346 | Gm16033 | 0.0000 | No |
| 18347 | Gm16034 | 0.0000 | No |
| 18348 | Gm16035 | 0.0000 | No |
| 18349 | Gm16036 | 0.0000 | No |
| 18350 | Gm16038 | 0.0000 | No |
| 18351 | Gm16041 | 0.0000 | No |

|       |         |        |    |
|-------|---------|--------|----|
| 18352 | Gm16042 | 0.0000 | No |
| 18353 | Gm16044 | 0.0000 | No |
| 18354 | Gm16045 | 0.0000 | No |
| 18355 | Gm16046 | 0.0000 | No |
| 18356 | Gm16048 | 0.0000 | No |
| 18357 | Gm16049 | 0.0000 | No |
| 18358 | Gm1604a | 0.0000 | No |
| 18359 | Gm1604b | 0.0000 | No |
| 18360 | Gm16050 | 0.0000 | No |
| 18361 | Gm16052 | 0.0000 | No |
| 18362 | Gm16053 | 0.0000 | No |
| 18363 | Gm16054 | 0.0000 | No |
| 18364 | Gm16055 | 0.0000 | No |
| 18365 | Gm16058 | 0.0000 | No |
| 18366 | Gm16059 | 0.0000 | No |
| 18367 | Gm16060 | 0.0000 | No |
| 18368 | Gm16061 | 0.0000 | No |
| 18369 | Gm16062 | 0.0000 | No |
| 18370 | Gm16063 | 0.0000 | No |
| 18371 | Gm16064 | 0.0000 | No |
| 18372 | Gm16066 | 0.0000 | No |
| 18373 | Gm16068 | 0.0000 | No |
| 18374 | Gm16070 | 0.0000 | No |
| 18375 | Gm16071 | 0.0000 | No |
| 18376 | Gm16072 | 0.0000 | No |
| 18377 | Gm16073 | 0.0000 | No |
| 18378 | Gm16074 | 0.0000 | No |
| 18379 | Gm16075 | 0.0000 | No |
| 18380 | Gm16076 | 0.0000 | No |
| 18381 | Gm16077 | 0.0000 | No |
| 18382 | Gm16079 | 0.0000 | No |
| 18383 | Gm16080 | 0.0000 | No |
| 18384 | Gm16081 | 0.0000 | No |
| 18385 | Gm16082 | 0.0000 | No |
| 18386 | Gm16083 | 0.0000 | No |
| 18387 | Gm16084 | 0.0000 | No |
| 18388 | Gm16089 | 0.0000 | No |
| 18389 | Gm16090 | 0.0000 | No |
| 18390 | Gm16091 | 0.0000 | No |
| 18391 | Gm16092 | 0.0000 | No |
| 18392 | Gm16094 | 0.0000 | No |
| 18393 | Gm16095 | 0.0000 | No |
| 18394 | Gm16096 | 0.0000 | No |
| 18395 | Gm16098 | 0.0000 | No |
| 18396 | Gm16099 | 0.0000 | No |
| 18397 | Gm16100 | 0.0000 | No |



|       |         |        |    |
|-------|---------|--------|----|
| 18398 | Gm16101 | 0.0000 | No |
| 18399 | Gm16102 | 0.0000 | No |
| 18400 | Gm16103 | 0.0000 | No |
| 18401 | Gm16104 | 0.0000 | No |
| 18402 | Gm16105 | 0.0000 | No |
| 18403 | Gm16106 | 0.0000 | No |
| 18404 | Gm16107 | 0.0000 | No |
| 18405 | Gm16111 | 0.0000 | No |
| 18406 | Gm16112 | 0.0000 | No |
| 18407 | Gm16114 | 0.0000 | No |
| 18408 | Gm16116 | 0.0000 | No |
| 18409 | Gm16117 | 0.0000 | No |
| 18410 | Gm16118 | 0.0000 | No |
| 18411 | Gm16120 | 0.0000 | No |
| 18412 | Gm16121 | 0.0000 | No |
| 18413 | Gm16122 | 0.0000 | No |
| 18414 | Gm16124 | 0.0000 | No |
| 18415 | Gm16125 | 0.0000 | No |
| 18416 | Gm16126 | 0.0000 | No |
| 18417 | Gm16127 | 0.0000 | No |
| 18418 | Gm16128 | 0.0000 | No |
| 18419 | Gm16129 | 0.0000 | No |
| 18420 | Gm16130 | 0.0000 | No |
| 18421 | Gm16131 | 0.0000 | No |
| 18422 | Gm16132 | 0.0000 | No |
| 18423 | Gm16133 | 0.0000 | No |
| 18424 | Gm16134 | 0.0000 | No |
| 18425 | Gm16135 | 0.0000 | No |
| 18426 | Gm16136 | 0.0000 | No |
| 18427 | Gm16137 | 0.0000 | No |
| 18428 | Gm16138 | 0.0000 | No |
| 18429 | Gm16142 | 0.0000 | No |
| 18430 | Gm16143 | 0.0000 | No |
| 18431 | Gm16144 | 0.0000 | No |
| 18432 | Gm16145 | 0.0000 | No |
| 18433 | Gm16146 | 0.0000 | No |
| 18434 | Gm16147 | 0.0000 | No |
| 18435 | Gm16148 | 0.0000 | No |
| 18436 | Gm16149 | 0.0000 | No |
| 18437 | Gm16150 | 0.0000 | No |
| 18438 | Gm16151 | 0.0000 | No |
| 18439 | Gm16152 | 0.0000 | No |
| 18440 | Gm16153 | 0.0000 | No |
| 18441 | Gm16156 | 0.0000 | No |
| 18442 | Gm16157 | 0.0000 | No |
| 18443 | Gm16159 | 0.0000 | No |

|       |         |        |    |
|-------|---------|--------|----|
| 18444 | Gm16160 | 0.0000 | No |
| 18445 | Gm16161 | 0.0000 | No |
| 18446 | Gm16162 | 0.0000 | No |
| 18447 | Gm16163 | 0.0000 | No |
| 18448 | Gm16164 | 0.0000 | No |
| 18449 | Gm16165 | 0.0000 | No |
| 18450 | Gm16166 | 0.0000 | No |
| 18451 | Gm16167 | 0.0000 | No |
| 18452 | Gm16169 | 0.0000 | No |
| 18453 | Gm16170 | 0.0000 | No |
| 18454 | Gm16171 | 0.0000 | No |
| 18455 | Gm16172 | 0.0000 | No |
| 18456 | Gm16174 | 0.0000 | No |
| 18457 | Gm16175 | 0.0000 | No |
| 18458 | Gm16178 | 0.0000 | No |
| 18459 | Gm16179 | 0.0000 | No |
| 18460 | Gm16180 | 0.0000 | No |
| 18461 | Gm16181 | 0.0000 | No |
| 18462 | Gm16183 | 0.0000 | No |
| 18463 | Gm16184 | 0.0000 | No |
| 18464 | Gm16185 | 0.0000 | No |
| 18465 | Gm16188 | 0.0000 | No |
| 18466 | Gm16189 | 0.0000 | No |
| 18467 | Gm16191 | 0.0000 | No |
| 18468 | Gm16192 | 0.0000 | No |
| 18469 | Gm16196 | 0.0000 | No |
| 18470 | Gm16198 | 0.0000 | No |
| 18471 | Gm16199 | 0.0000 | No |
| 18472 | Gm16200 | 0.0000 | No |
| 18473 | Gm16201 | 0.0000 | No |
| 18474 | Gm16204 | 0.0000 | No |
| 18475 | Gm16205 | 0.0000 | No |
| 18476 | Gm16206 | 0.0000 | No |
| 18477 | Gm16208 | 0.0000 | No |
| 18478 | Gm16209 | 0.0000 | No |
| 18479 | Gm16210 | 0.0000 | No |
| 18480 | Gm16211 | 0.0000 | No |
| 18481 | Gm16212 | 0.0000 | No |
| 18482 | Gm16213 | 0.0000 | No |
| 18483 | Gm16214 | 0.0000 | No |
| 18484 | Gm16215 | 0.0000 | No |
| 18485 | Gm16217 | 0.0000 | No |
| 18486 | Gm16218 | 0.0000 | No |
| 18487 | Gm16219 | 0.0000 | No |
| 18488 | Gm16220 | 0.0000 | No |
| 18489 | Gm16222 | 0.0000 | No |

|       |         |        |    |
|-------|---------|--------|----|
| 18490 | Gm16223 | 0.0000 | No |
| 18491 | Gm16225 | 0.0000 | No |
| 18492 | Gm16226 | 0.0000 | No |
| 18493 | Gm16227 | 0.0000 | No |
| 18494 | Gm16228 | 0.0000 | No |
| 18495 | Gm16229 | 0.0000 | No |
| 18496 | Gm16230 | 0.0000 | No |
| 18497 | Gm16231 | 0.0000 | No |
| 18498 | Gm16232 | 0.0000 | No |
| 18499 | Gm16233 | 0.0000 | No |
| 18500 | Gm16234 | 0.0000 | No |
| 18501 | Gm16235 | 0.0000 | No |
| 18502 | Gm16237 | 0.0000 | No |
| 18503 | Gm16238 | 0.0000 | No |
| 18504 | Gm16239 | 0.0000 | No |
| 18505 | Gm16240 | 0.0000 | No |
| 18506 | Gm16242 | 0.0000 | No |
| 18507 | Gm16243 | 0.0000 | No |
| 18508 | Gm16244 | 0.0000 | No |
| 18509 | Gm16248 | 0.0000 | No |
| 18510 | Gm16249 | 0.0000 | No |
| 18511 | Gm16251 | 0.0000 | No |
| 18512 | Gm16252 | 0.0000 | No |
| 18513 | Gm16253 | 0.0000 | No |
| 18514 | Gm16254 | 0.0000 | No |
| 18515 | Gm16259 | 0.0000 | No |
| 18516 | Gm16261 | 0.0000 | No |
| 18517 | Gm16263 | 0.0000 | No |
| 18518 | Gm16265 | 0.0000 | No |
| 18519 | Gm16267 | 0.0000 | No |
| 18520 | Gm16269 | 0.0000 | No |
| 18521 | Gm1627  | 0.0000 | No |
| 18522 | Gm16272 | 0.0000 | No |
| 18523 | Gm16273 | 0.0000 | No |
| 18524 | Gm16274 | 0.0000 | No |
| 18525 | Gm16275 | 0.0000 | No |
| 18526 | Gm16276 | 0.0000 | No |
| 18527 | Gm16277 | 0.0000 | No |
| 18528 | Gm16278 | 0.0000 | No |
| 18529 | Gm16279 | 0.0000 | No |
| 18530 | Gm16282 | 0.0000 | No |
| 18531 | Gm16283 | 0.0000 | No |
| 18532 | Gm16284 | 0.0000 | No |
| 18533 | Gm16285 | 0.0000 | No |
| 18534 | Gm16286 | 0.0000 | No |
| 18535 | Gm16287 | 0.0000 | No |

|       |         |        |    |
|-------|---------|--------|----|
| 18536 | Gm16288 | 0.0000 | No |
| 18537 | Gm16290 | 0.0000 | No |
| 18538 | Gm16291 | 0.0000 | No |
| 18539 | Gm16294 | 0.0000 | No |
| 18540 | Gm16295 | 0.0000 | No |
| 18541 | Gm16297 | 0.0000 | No |
| 18542 | Gm16298 | 0.0000 | No |
| 18543 | Gm16299 | 0.0000 | No |
| 18544 | Gm16301 | 0.0000 | No |
| 18545 | Gm16302 | 0.0000 | No |
| 18546 | Gm16304 | 0.0000 | No |
| 18547 | Gm16306 | 0.0000 | No |
| 18548 | Gm16307 | 0.0000 | No |
| 18549 | Gm16308 | 0.0000 | No |
| 18550 | Gm16310 | 0.0000 | No |
| 18551 | Gm16311 | 0.0000 | No |
| 18552 | Gm16312 | 0.0000 | No |
| 18553 | Gm16314 | 0.0000 | No |
| 18554 | Gm16315 | 0.0000 | No |
| 18555 | Gm16318 | 0.0000 | No |
| 18556 | Gm16321 | 0.0000 | No |
| 18557 | Gm16322 | 0.0000 | No |
| 18558 | Gm16323 | 0.0000 | No |
| 18559 | Gm16325 | 0.0000 | No |
| 18560 | Gm16326 | 0.0000 | No |
| 18561 | Gm16328 | 0.0000 | No |
| 18562 | Gm16330 | 0.0000 | No |
| 18563 | Gm16331 | 0.0000 | No |
| 18564 | Gm16332 | 0.0000 | No |
| 18565 | Gm16333 | 0.0000 | No |
| 18566 | Gm16334 | 0.0000 | No |
| 18567 | Gm16335 | 0.0000 | No |
| 18568 | Gm16336 | 0.0000 | No |
| 18569 | Gm16337 | 0.0000 | No |
| 18570 | Gm16339 | 0.0000 | No |
| 18571 | Gm16343 | 0.0000 | No |
| 18572 | Gm16344 | 0.0000 | No |
| 18573 | Gm16345 | 0.0000 | No |
| 18574 | Gm16346 | 0.0000 | No |
| 18575 | Gm16347 | 0.0000 | No |
| 18576 | Gm16350 | 0.0000 | No |
| 18577 | Gm16351 | 0.0000 | No |
| 18578 | Gm16353 | 0.0000 | No |
| 18579 | Gm16354 | 0.0000 | No |
| 18580 | Gm16356 | 0.0000 | No |
| 18581 | Gm16357 | 0.0000 | No |

|       |         |        |    |
|-------|---------|--------|----|
| 18582 | Gm16358 | 0.0000 | No |
| 18583 | Gm16359 | 0.0000 | No |
| 18584 | Gm16362 | 0.0000 | No |
| 18585 | Gm16363 | 0.0000 | No |
| 18586 | Gm16364 | 0.0000 | No |
| 18587 | Gm16365 | 0.0000 | No |
| 18588 | Gm16367 | 0.0000 | No |
| 18589 | Gm16368 | 0.0000 | No |
| 18590 | Gm16372 | 0.0000 | No |
| 18591 | Gm16373 | 0.0000 | No |
| 18592 | Gm16378 | 0.0000 | No |
| 18593 | Gm16379 | 0.0000 | No |
| 18594 | Gm16381 | 0.0000 | No |
| 18595 | Gm16383 | 0.0000 | No |
| 18596 | Gm16387 | 0.0000 | No |
| 18597 | Gm16391 | 0.0000 | No |
| 18598 | Gm16394 | 0.0000 | No |
| 18599 | Gm16397 | 0.0000 | No |
| 18600 | Gm16400 | 0.0000 | No |
| 18601 | Gm16401 | 0.0000 | No |
| 18602 | Gm16404 | 0.0000 | No |
| 18603 | Gm16405 | 0.0000 | No |
| 18604 | Gm16407 | 0.0000 | No |
| 18605 | Gm16409 | 0.0000 | No |
| 18606 | Gm16410 | 0.0000 | No |
| 18607 | Gm16412 | 0.0000 | No |
| 18608 | Gm16415 | 0.0000 | No |
| 18609 | Gm16416 | 0.0000 | No |
| 18610 | Gm16418 | 0.0000 | No |
| 18611 | Gm16420 | 0.0000 | No |
| 18612 | Gm16421 | 0.0000 | No |
| 18613 | Gm16423 | 0.0000 | No |
| 18614 | Gm16425 | 0.0000 | No |
| 18615 | Gm16427 | 0.0000 | No |
| 18616 | Gm16428 | 0.0000 | No |
| 18617 | Gm16429 | 0.0000 | No |
| 18618 | Gm16430 | 0.0000 | No |
| 18619 | Gm16431 | 0.0000 | No |
| 18620 | Gm16432 | 0.0000 | No |
| 18621 | Gm16433 | 0.0000 | No |
| 18622 | Gm16434 | 0.0000 | No |
| 18623 | Gm16437 | 0.0000 | No |
| 18624 | Gm16439 | 0.0000 | No |
| 18625 | Gm16440 | 0.0000 | No |
| 18626 | Gm16441 | 0.0000 | No |
| 18627 | Gm16442 | 0.0000 | No |

|       |         |        |    |
|-------|---------|--------|----|
| 18628 | Gm16443 | 0.0000 | No |
| 18629 | Gm16445 | 0.0000 | No |
| 18630 | Gm16451 | 0.0000 | No |
| 18631 | Gm16456 | 0.0000 | No |
| 18632 | Gm16458 | 0.0000 | No |
| 18633 | Gm16463 | 0.0000 | No |
| 18634 | Gm16465 | 0.0000 | No |
| 18635 | Gm1647  | 0.0000 | No |
| 18636 | Gm16470 | 0.0000 | No |
| 18637 | Gm16471 | 0.0000 | No |
| 18638 | Gm16475 | 0.0000 | No |
| 18639 | Gm16477 | 0.0000 | No |
| 18640 | Gm16478 | 0.0000 | No |
| 18641 | Gm16479 | 0.0000 | No |
| 18642 | Gm16480 | 0.0000 | No |
| 18643 | Gm16481 | 0.0000 | No |
| 18644 | Gm16487 | 0.0000 | No |
| 18645 | Gm16490 | 0.0000 | No |
| 18646 | Gm16503 | 0.0000 | No |
| 18647 | Gm16505 | 0.0000 | No |
| 18648 | Gm16506 | 0.0000 | No |
| 18649 | Gm16508 | 0.0000 | No |
| 18650 | Gm16510 | 0.0000 | No |
| 18651 | Gm16511 | 0.0000 | No |
| 18652 | Gm16513 | 0.0000 | No |
| 18653 | Gm16518 | 0.0000 | No |
| 18654 | Gm16519 | 0.0000 | No |
| 18655 | Gm16523 | 0.0000 | No |
| 18656 | Gm16531 | 0.0000 | No |
| 18657 | Gm16536 | 0.0000 | No |
| 18658 | Gm16537 | 0.0000 | No |
| 18659 | Gm16538 | 0.0000 | No |
| 18660 | Gm16539 | 0.0000 | No |
| 18661 | Gm16540 | 0.0000 | No |
| 18662 | Gm16541 | 0.0000 | No |
| 18663 | Gm16545 | 0.0000 | No |
| 18664 | Gm16547 | 0.0000 | No |
| 18665 | Gm16548 | 0.0000 | No |
| 18666 | Gm16549 | 0.0000 | No |
| 18667 | Gm16550 | 0.0000 | No |
| 18668 | Gm16551 | 0.0000 | No |
| 18669 | Gm16552 | 0.0000 | No |
| 18670 | Gm16553 | 0.0000 | No |
| 18671 | Gm16555 | 0.0000 | No |
| 18672 | Gm16557 | 0.0000 | No |
| 18673 | Gm16558 | 0.0000 | No |

|       |         |        |    |
|-------|---------|--------|----|
| 18674 | Gm16559 | 0.0000 | No |
| 18675 | Gm16560 | 0.0000 | No |
| 18676 | Gm16561 | 0.0000 | No |
| 18677 | Gm16563 | 0.0000 | No |
| 18678 | Gm16564 | 0.0000 | No |
| 18679 | Gm16565 | 0.0000 | No |
| 18680 | Gm16566 | 0.0000 | No |
| 18681 | Gm16567 | 0.0000 | No |
| 18682 | Gm16568 | 0.0000 | No |
| 18683 | Gm16569 | 0.0000 | No |
| 18684 | Gm16571 | 0.0000 | No |
| 18685 | Gm16572 | 0.0000 | No |
| 18686 | Gm16573 | 0.0000 | No |
| 18687 | Gm16574 | 0.0000 | No |
| 18688 | Gm16575 | 0.0000 | No |
| 18689 | Gm16576 | 0.0000 | No |
| 18690 | Gm16579 | 0.0000 | No |
| 18691 | Gm16580 | 0.0000 | No |
| 18692 | Gm16581 | 0.0000 | No |
| 18693 | Gm16582 | 0.0000 | No |
| 18694 | Gm16584 | 0.0000 | No |
| 18695 | Gm16587 | 0.0000 | No |
| 18696 | Gm16588 | 0.0000 | No |
| 18697 | Gm16589 | 0.0000 | No |
| 18698 | Gm16596 | 0.0000 | No |
| 18699 | Gm16599 | 0.0000 | No |
| 18700 | Gm1661  | 0.0000 | No |
| 18701 | Gm16618 | 0.0000 | No |
| 18702 | Gm16619 | 0.0000 | No |
| 18703 | Gm16630 | 0.0000 | No |
| 18704 | Gm16638 | 0.0000 | No |
| 18705 | Gm1667  | 0.0000 | No |
| 18706 | Gm16675 | 0.0000 | No |
| 18707 | Gm16677 | 0.0000 | No |
| 18708 | Gm16686 | 0.0000 | No |
| 18709 | Gm16701 | 0.0000 | No |
| 18710 | Gm16712 | 0.0000 | No |
| 18711 | Gm16725 | 0.0000 | No |
| 18712 | Gm1673  | 0.0000 | No |
| 18713 | Gm16731 | 0.0000 | No |
| 18714 | Gm16740 | 0.0000 | No |
| 18715 | Gm16741 | 0.0000 | No |
| 18716 | Gm16754 | 0.0000 | No |
| 18717 | Gm16755 | 0.0000 | No |
| 18718 | Gm16758 | 0.0000 | No |
| 18719 | Gm16759 | 0.0000 | No |

|       |         |        |    |
|-------|---------|--------|----|
| 18720 | Gm16764 | 0.0000 | No |
| 18721 | Gm16793 | 0.0000 | No |
| 18722 | Gm16794 | 0.0000 | No |
| 18723 | Gm16796 | 0.0000 | No |
| 18724 | Gm16833 | 0.0000 | No |
| 18725 | Gm16835 | 0.0000 | No |
| 18726 | Gm16845 | 0.0000 | No |
| 18727 | Gm16853 | 0.0000 | No |
| 18728 | Gm16861 | 0.0000 | No |
| 18729 | Gm16867 | 0.0000 | No |
| 18730 | Gm16876 | 0.0000 | No |
| 18731 | Gm16892 | 0.0000 | No |
| 18732 | Gm16894 | 0.0000 | No |
| 18733 | Gm16897 | 0.0000 | No |
| 18734 | Gm16907 | 0.0000 | No |
| 18735 | Gm16933 | 0.0000 | No |
| 18736 | Gm16938 | 0.0000 | No |
| 18737 | Gm16958 | 0.0000 | No |
| 18738 | Gm16973 | 0.0000 | No |
| 18739 | Gm16976 | 0.0000 | No |
| 18740 | Gm1698  | 0.0000 | No |
| 18741 | Gm16982 | 0.0000 | No |
| 18742 | Gm16984 | 0.0000 | No |
| 18743 | Gm17014 | 0.0000 | No |
| 18744 | Gm17017 | 0.0000 | No |
| 18745 | Gm17018 | 0.0000 | No |
| 18746 | Gm17019 | 0.0000 | No |
| 18747 | Gm17020 | 0.0000 | No |
| 18748 | Gm17022 | 0.0000 | No |
| 18749 | Gm17023 | 0.0000 | No |
| 18750 | Gm17024 | 0.0000 | No |
| 18751 | Gm17026 | 0.0000 | No |
| 18752 | Gm17027 | 0.0000 | No |
| 18753 | Gm17028 | 0.0000 | No |
| 18754 | Gm17029 | 0.0000 | No |
| 18755 | Gm17030 | 0.0000 | No |
| 18756 | Gm17031 | 0.0000 | No |
| 18757 | Gm17032 | 0.0000 | No |
| 18758 | Gm17033 | 0.0000 | No |
| 18759 | Gm17034 | 0.0000 | No |
| 18760 | Gm17035 | 0.0000 | No |
| 18761 | Gm17036 | 0.0000 | No |
| 18762 | Gm17038 | 0.0000 | No |
| 18763 | Gm17039 | 0.0000 | No |
| 18764 | Gm17040 | 0.0000 | No |
| 18765 | Gm17041 | 0.0000 | No |



|       |         |        |    |
|-------|---------|--------|----|
| 18766 | Gm17043 | 0.0000 | No |
| 18767 | Gm17044 | 0.0000 | No |
| 18768 | Gm17045 | 0.0000 | No |
| 18769 | Gm17046 | 0.0000 | No |
| 18770 | Gm17047 | 0.0000 | No |
| 18771 | Gm17048 | 0.0000 | No |
| 18772 | Gm17051 | 0.0000 | No |
| 18773 | Gm17052 | 0.0000 | No |
| 18774 | Gm17053 | 0.0000 | No |
| 18775 | Gm17054 | 0.0000 | No |
| 18776 | Gm17057 | 0.0000 | No |
| 18777 | Gm17058 | 0.0000 | No |
| 18778 | Gm17059 | 0.0000 | No |
| 18779 | Gm17060 | 0.0000 | No |
| 18780 | Gm17061 | 0.0000 | No |
| 18781 | Gm17062 | 0.0000 | No |
| 18782 | Gm17063 | 0.0000 | No |
| 18783 | Gm17064 | 0.0000 | No |
| 18784 | Gm17065 | 0.0000 | No |
| 18785 | Gm17066 | 0.0000 | No |
| 18786 | Gm17067 | 0.0000 | No |
| 18787 | Gm17068 | 0.0000 | No |
| 18788 | Gm17069 | 0.0000 | No |
| 18789 | Gm17072 | 0.0000 | No |
| 18790 | Gm17073 | 0.0000 | No |
| 18791 | Gm17074 | 0.0000 | No |
| 18792 | Gm17077 | 0.0000 | No |
| 18793 | Gm17078 | 0.0000 | No |
| 18794 | Gm17079 | 0.0000 | No |
| 18795 | Gm17080 | 0.0000 | No |
| 18796 | Gm17081 | 0.0000 | No |
| 18797 | Gm17082 | 0.0000 | No |
| 18798 | Gm17083 | 0.0000 | No |
| 18799 | Gm17084 | 0.0000 | No |
| 18800 | Gm17085 | 0.0000 | No |
| 18801 | Gm17086 | 0.0000 | No |
| 18802 | Gm17087 | 0.0000 | No |
| 18803 | Gm17088 | 0.0000 | No |
| 18804 | Gm17089 | 0.0000 | No |
| 18805 | Gm17090 | 0.0000 | No |
| 18806 | Gm17091 | 0.0000 | No |
| 18807 | Gm17092 | 0.0000 | No |
| 18808 | Gm17093 | 0.0000 | No |
| 18809 | Gm17094 | 0.0000 | No |
| 18810 | Gm17096 | 0.0000 | No |
| 18811 | Gm17097 | 0.0000 | No |

|       |         |        |    |
|-------|---------|--------|----|
| 18812 | Gm17099 | 0.0000 | No |
| 18813 | Gm17101 | 0.0000 | No |
| 18814 | Gm17102 | 0.0000 | No |
| 18815 | Gm17106 | 0.0000 | No |
| 18816 | Gm17107 | 0.0000 | No |
| 18817 | Gm17108 | 0.0000 | No |
| 18818 | Gm17109 | 0.0000 | No |
| 18819 | Gm17111 | 0.0000 | No |
| 18820 | Gm17112 | 0.0000 | No |
| 18821 | Gm17113 | 0.0000 | No |
| 18822 | Gm17114 | 0.0000 | No |
| 18823 | Gm17115 | 0.0000 | No |
| 18824 | Gm17116 | 0.0000 | No |
| 18825 | Gm17117 | 0.0000 | No |
| 18826 | Gm17119 | 0.0000 | No |
| 18827 | Gm17120 | 0.0000 | No |
| 18828 | Gm17121 | 0.0000 | No |
| 18829 | Gm17122 | 0.0000 | No |
| 18830 | Gm17124 | 0.0000 | No |
| 18831 | Gm17126 | 0.0000 | No |
| 18832 | Gm17129 | 0.0000 | No |
| 18833 | Gm17130 | 0.0000 | No |
| 18834 | Gm17131 | 0.0000 | No |
| 18835 | Gm17132 | 0.0000 | No |
| 18836 | Gm17133 | 0.0000 | No |
| 18837 | Gm17134 | 0.0000 | No |
| 18838 | Gm17135 | 0.0000 | No |
| 18839 | Gm17136 | 0.0000 | No |
| 18840 | Gm17137 | 0.0000 | No |
| 18841 | Gm17138 | 0.0000 | No |
| 18842 | Gm17139 | 0.0000 | No |
| 18843 | Gm17141 | 0.0000 | No |
| 18844 | Gm17142 | 0.0000 | No |
| 18845 | Gm17146 | 0.0000 | No |
| 18846 | Gm17147 | 0.0000 | No |
| 18847 | Gm17148 | 0.0000 | No |
| 18848 | Gm17149 | 0.0000 | No |
| 18849 | Gm17151 | 0.0000 | No |
| 18850 | Gm17152 | 0.0000 | No |
| 18851 | Gm17153 | 0.0000 | No |
| 18852 | Gm17154 | 0.0000 | No |
| 18853 | Gm17157 | 0.0000 | No |
| 18854 | Gm17158 | 0.0000 | No |
| 18855 | Gm17161 | 0.0000 | No |
| 18856 | Gm17162 | 0.0000 | No |
| 18857 | Gm17163 | 0.0000 | No |

|       |         |        |    |
|-------|---------|--------|----|
| 18858 | Gm17164 | 0.0000 | No |
| 18859 | Gm17165 | 0.0000 | No |
| 18860 | Gm17166 | 0.0000 | No |
| 18861 | Gm17167 | 0.0000 | No |
| 18862 | Gm17168 | 0.0000 | No |
| 18863 | Gm17169 | 0.0000 | No |
| 18864 | Gm17170 | 0.0000 | No |
| 18865 | Gm17171 | 0.0000 | No |
| 18866 | Gm17172 | 0.0000 | No |
| 18867 | Gm17173 | 0.0000 | No |
| 18868 | Gm17175 | 0.0000 | No |
| 18869 | Gm17177 | 0.0000 | No |
| 18870 | Gm17178 | 0.0000 | No |
| 18871 | Gm17180 | 0.0000 | No |
| 18872 | Gm17181 | 0.0000 | No |
| 18873 | Gm17184 | 0.0000 | No |
| 18874 | Gm17186 | 0.0000 | No |
| 18875 | Gm17187 | 0.0000 | No |
| 18876 | Gm17188 | 0.0000 | No |
| 18877 | Gm17189 | 0.0000 | No |
| 18878 | Gm17190 | 0.0000 | No |
| 18879 | Gm17191 | 0.0000 | No |
| 18880 | Gm17192 | 0.0000 | No |
| 18881 | Gm17193 | 0.0000 | No |
| 18882 | Gm17194 | 0.0000 | No |
| 18883 | Gm17195 | 0.0000 | No |
| 18884 | Gm17197 | 0.0000 | No |
| 18885 | Gm17198 | 0.0000 | No |
| 18886 | Gm17199 | 0.0000 | No |
| 18887 | Gm1720  | 0.0000 | No |
| 18888 | Gm17200 | 0.0000 | No |
| 18889 | Gm17201 | 0.0000 | No |
| 18890 | Gm17202 | 0.0000 | No |
| 18891 | Gm17203 | 0.0000 | No |
| 18892 | Gm17204 | 0.0000 | No |
| 18893 | Gm17205 | 0.0000 | No |
| 18894 | Gm17206 | 0.0000 | No |
| 18895 | Gm17207 | 0.0000 | No |
| 18896 | Gm17208 | 0.0000 | No |
| 18897 | Gm17210 | 0.0000 | No |
| 18898 | Gm17212 | 0.0000 | No |
| 18899 | Gm17214 | 0.0000 | No |
| 18900 | Gm17215 | 0.0000 | No |
| 18901 | Gm17216 | 0.0000 | No |
| 18902 | Gm17217 | 0.0000 | No |
| 18903 | Gm17218 | 0.0000 | No |

|       |         |        |    |
|-------|---------|--------|----|
| 18904 | Gm17219 | 0.0000 | No |
| 18905 | Gm17221 | 0.0000 | No |
| 18906 | Gm17222 | 0.0000 | No |
| 18907 | Gm17223 | 0.0000 | No |
| 18908 | Gm17226 | 0.0000 | No |
| 18909 | Gm17227 | 0.0000 | No |
| 18910 | Gm17228 | 0.0000 | No |
| 18911 | Gm17230 | 0.0000 | No |
| 18912 | Gm17231 | 0.0000 | No |
| 18913 | Gm17232 | 0.0000 | No |
| 18914 | Gm17233 | 0.0000 | No |
| 18915 | Gm17234 | 0.0000 | No |
| 18916 | Gm17235 | 0.0000 | No |
| 18917 | Gm17244 | 0.0000 | No |
| 18918 | Gm17249 | 0.0000 | No |
| 18919 | Gm17250 | 0.0000 | No |
| 18920 | Gm17251 | 0.0000 | No |
| 18921 | Gm17258 | 0.0000 | No |
| 18922 | Gm17259 | 0.0000 | No |
| 18923 | Gm17267 | 0.0000 | No |
| 18924 | Gm17268 | 0.0000 | No |
| 18925 | Gm17271 | 0.0000 | No |
| 18926 | Gm17275 | 0.0000 | No |
| 18927 | Gm17276 | 0.0000 | No |
| 18928 | Gm17281 | 0.0000 | No |
| 18929 | Gm17300 | 0.0000 | No |
| 18930 | Gm17304 | 0.0000 | No |
| 18931 | Gm17305 | 0.0000 | No |
| 18932 | Gm17308 | 0.0000 | No |
| 18933 | Gm17322 | 0.0000 | No |
| 18934 | Gm17324 | 0.0000 | No |
| 18935 | Gm17330 | 0.0000 | No |
| 18936 | Gm17332 | 0.0000 | No |
| 18937 | Gm17334 | 0.0000 | No |
| 18938 | Gm17344 | 0.0000 | No |
| 18939 | Gm17354 | 0.0000 | No |
| 18940 | Gm17361 | 0.0000 | No |
| 18941 | Gm17364 | 0.0000 | No |
| 18942 | Gm17366 | 0.0000 | No |
| 18943 | Gm17374 | 0.0000 | No |
| 18944 | Gm17376 | 0.0000 | No |
| 18945 | Gm17377 | 0.0000 | No |
| 18946 | Gm17382 | 0.0000 | No |
| 18947 | Gm17383 | 0.0000 | No |
| 18948 | Gm17387 | 0.0000 | No |
| 18949 | Gm17391 | 0.0000 | No |

|       |         |        |    |
|-------|---------|--------|----|
| 18950 | Gm17396 | 0.0000 | No |
| 18951 | Gm17399 | 0.0000 | No |
| 18952 | Gm17402 | 0.0000 | No |
| 18953 | Gm17404 | 0.0000 | No |
| 18954 | Gm17409 | 0.0000 | No |
| 18955 | Gm17412 | 0.0000 | No |
| 18956 | Gm17415 | 0.0000 | No |
| 18957 | Gm17416 | 0.0000 | No |
| 18958 | Gm17420 | 0.0000 | No |
| 18959 | Gm17428 | 0.0000 | No |
| 18960 | Gm17430 | 0.0000 | No |
| 18961 | Gm17435 | 0.0000 | No |
| 18962 | Gm17449 | 0.0000 | No |
| 18963 | Gm17450 | 0.0000 | No |
| 18964 | Gm17467 | 0.0000 | No |
| 18965 | Gm17469 | 0.0000 | No |
| 18966 | Gm17473 | 0.0000 | No |
| 18967 | Gm17477 | 0.0000 | No |
| 18968 | Gm17482 | 0.0000 | No |
| 18969 | Gm17484 | 0.0000 | No |
| 18970 | Gm17490 | 0.0000 | No |
| 18971 | Gm17491 | 0.0000 | No |
| 18972 | Gm17494 | 0.0000 | No |
| 18973 | Gm17501 | 0.0000 | No |
| 18974 | Gm17509 | 0.0000 | No |
| 18975 | Gm17511 | 0.0000 | No |
| 18976 | Gm17514 | 0.0000 | No |
| 18977 | Gm17518 | 0.0000 | No |
| 18978 | Gm17521 | 0.0000 | No |
| 18979 | Gm17522 | 0.0000 | No |
| 18980 | Gm17529 | 0.0000 | No |
| 18981 | Gm17530 | 0.0000 | No |
| 18982 | Gm17535 | 0.0000 | No |
| 18983 | Gm17538 | 0.0000 | No |
| 18984 | Gm17540 | 0.0000 | No |
| 18985 | Gm17541 | 0.0000 | No |
| 18986 | Gm17542 | 0.0000 | No |
| 18987 | Gm17545 | 0.0000 | No |
| 18988 | Gm17546 | 0.0000 | No |
| 18989 | Gm17552 | 0.0000 | No |
| 18990 | Gm17555 | 0.0000 | No |
| 18991 | Gm17567 | 0.0000 | No |
| 18992 | Gm17571 | 0.0000 | No |
| 18993 | Gm17572 | 0.0000 | No |
| 18994 | Gm17575 | 0.0000 | No |
| 18995 | Gm17577 | 0.0000 | No |

|       |         |        |    |
|-------|---------|--------|----|
| 18996 | Gm1758  | 0.0000 | No |
| 18997 | Gm17581 | 0.0000 | No |
| 18998 | Gm17584 | 0.0000 | No |
| 18999 | Gm17586 | 0.0000 | No |
| 19000 | Gm17590 | 0.0000 | No |
| 19001 | Gm17597 | 0.0000 | No |
| 19002 | Gm17604 | 0.0000 | No |
| 19003 | Gm17611 | 0.0000 | No |
| 19004 | Gm17613 | 0.0000 | No |
| 19005 | Gm17615 | 0.0000 | No |
| 19006 | Gm17617 | 0.0000 | No |
| 19007 | Gm17619 | 0.0000 | No |
| 19008 | Gm17622 | 0.0000 | No |
| 19009 | Gm17631 | 0.0000 | No |
| 19010 | Gm17641 | 0.0000 | No |
| 19011 | Gm17644 | 0.0000 | No |
| 19012 | Gm17651 | 0.0000 | No |
| 19013 | Gm17654 | 0.0000 | No |
| 19014 | Gm17655 | 0.0000 | No |
| 19015 | Gm17657 | 0.0000 | No |
| 19016 | Gm17660 | 0.0000 | No |
| 19017 | Gm17661 | 0.0000 | No |
| 19018 | Gm17662 | 0.0000 | No |
| 19019 | Gm17669 | 0.0000 | No |
| 19020 | Gm17689 | 0.0000 | No |
| 19021 | Gm17690 | 0.0000 | No |
| 19022 | Gm17693 | 0.0000 | No |
| 19023 | Gm17705 | 0.0000 | No |
| 19024 | Gm17709 | 0.0000 | No |
| 19025 | Gm17711 | 0.0000 | No |
| 19026 | Gm17720 | 0.0000 | No |
| 19027 | Gm17727 | 0.0000 | No |
| 19028 | Gm17728 | 0.0000 | No |
| 19029 | Gm17732 | 0.0000 | No |
| 19030 | Gm17733 | 0.0000 | No |
| 19031 | Gm17737 | 0.0000 | No |
| 19032 | Gm17748 | 0.0000 | No |
| 19033 | Gm17750 | 0.0000 | No |
| 19034 | Gm17751 | 0.0000 | No |
| 19035 | Gm17752 | 0.0000 | No |
| 19036 | Gm17764 | 0.0000 | No |
| 19037 | Gm17766 | 0.0000 | No |
| 19038 | Gm17767 | 0.0000 | No |
| 19039 | Gm17768 | 0.0000 | No |
| 19040 | Gm17771 | 0.0000 | No |
| 19041 | Gm17775 | 0.0000 | No |

|       |         |        |    |
|-------|---------|--------|----|
| 19042 | Gm17777 | 0.0000 | No |
| 19043 | Gm17781 | 0.0000 | No |
| 19044 | Gm17782 | 0.0000 | No |
| 19045 | Gm17786 | 0.0000 | No |
| 19046 | Gm17798 | 0.0000 | No |
| 19047 | Gm17799 | 0.0000 | No |
| 19048 | Gm17806 | 0.0000 | No |
| 19049 | Gm17807 | 0.0000 | No |
| 19050 | Gm17808 | 0.0000 | No |
| 19051 | Gm17811 | 0.0000 | No |
| 19052 | Gm17812 | 0.0000 | No |
| 19053 | Gm17813 | 0.0000 | No |
| 19054 | Gm17815 | 0.0000 | No |
| 19055 | Gm17822 | 0.0000 | No |
| 19056 | Gm17824 | 0.0000 | No |
| 19057 | Gm17825 | 0.0000 | No |
| 19058 | Gm17826 | 0.0000 | No |
| 19059 | Gm17828 | 0.0000 | No |
| 19060 | Gm17831 | 0.0000 | No |
| 19061 | Gm17833 | 0.0000 | No |
| 19062 | Gm17835 | 0.0000 | No |
| 19063 | Gm17836 | 0.0000 | No |
| 19064 | Gm17837 | 0.0000 | No |
| 19065 | Gm17867 | 0.0000 | No |
| 19066 | Gm17868 | 0.0000 | No |
| 19067 | Gm17877 | 0.0000 | No |
| 19068 | Gm17887 | 0.0000 | No |
| 19069 | Gm17889 | 0.0000 | No |
| 19070 | Gm17893 | 0.0000 | No |
| 19071 | Gm17895 | 0.0000 | No |
| 19072 | Gm17906 | 0.0000 | No |
| 19073 | Gm17907 | 0.0000 | No |
| 19074 | Gm17908 | 0.0000 | No |
| 19075 | Gm17909 | 0.0000 | No |
| 19076 | Gm17910 | 0.0000 | No |
| 19077 | Gm17916 | 0.0000 | No |
| 19078 | Gm17918 | 0.0000 | No |
| 19079 | Gm17919 | 0.0000 | No |
| 19080 | Gm17929 | 0.0000 | No |
| 19081 | Gm17931 | 0.0000 | No |
| 19082 | Gm17934 | 0.0000 | No |
| 19083 | Gm17935 | 0.0000 | No |
| 19084 | Gm17936 | 0.0000 | No |
| 19085 | Gm17937 | 0.0000 | No |
| 19086 | Gm17946 | 0.0000 | No |
| 19087 | Gm17949 | 0.0000 | No |

|       |         |        |    |
|-------|---------|--------|----|
| 19088 | Gm17951 | 0.0000 | No |
| 19089 | Gm17952 | 0.0000 | No |
| 19090 | Gm17953 | 0.0000 | No |
| 19091 | Gm17954 | 0.0000 | No |
| 19092 | Gm17965 | 0.0000 | No |
| 19093 | Gm17966 | 0.0000 | No |
| 19094 | Gm17967 | 0.0000 | No |
| 19095 | Gm17968 | 0.0000 | No |
| 19096 | Gm17969 | 0.0000 | No |
| 19097 | Gm17970 | 0.0000 | No |
| 19098 | Gm17971 | 0.0000 | No |
| 19099 | Gm17976 | 0.0000 | No |
| 19100 | Gm17977 | 0.0000 | No |
| 19101 | Gm17978 | 0.0000 | No |
| 19102 | Gm17981 | 0.0000 | No |
| 19103 | Gm17983 | 0.0000 | No |
| 19104 | Gm17988 | 0.0000 | No |
| 19105 | Gm17989 | 0.0000 | No |
| 19106 | Gm17990 | 0.0000 | No |
| 19107 | Gm17991 | 0.0000 | No |
| 19108 | Gm17992 | 0.0000 | No |
| 19109 | Gm17994 | 0.0000 | No |
| 19110 | Gm17995 | 0.0000 | No |
| 19111 | Gm17997 | 0.0000 | No |
| 19112 | Gm17999 | 0.0000 | No |
| 19113 | Gm18006 | 0.0000 | No |
| 19114 | Gm18007 | 0.0000 | No |
| 19115 | Gm18010 | 0.0000 | No |
| 19116 | Gm18012 | 0.0000 | No |
| 19117 | Gm18014 | 0.0000 | No |
| 19118 | Gm18018 | 0.0000 | No |
| 19119 | Gm18025 | 0.0000 | No |
| 19120 | Gm18033 | 0.0000 | No |
| 19121 | Gm18036 | 0.0000 | No |
| 19122 | Gm18038 | 0.0000 | No |
| 19123 | Gm18049 | 0.0000 | No |
| 19124 | Gm18052 | 0.0000 | No |
| 19125 | Gm18054 | 0.0000 | No |
| 19126 | Gm18055 | 0.0000 | No |
| 19127 | Gm18056 | 0.0000 | No |
| 19128 | Gm18057 | 0.0000 | No |
| 19129 | Gm18058 | 0.0000 | No |
| 19130 | Gm18059 | 0.0000 | No |
| 19131 | Gm18060 | 0.0000 | No |
| 19132 | Gm18061 | 0.0000 | No |
| 19133 | Gm18062 | 0.0000 | No |



|       |         |        |    |
|-------|---------|--------|----|
| 19134 | Gm18063 | 0.0000 | No |
| 19135 | Gm18066 | 0.0000 | No |
| 19136 | Gm18100 | 0.0000 | No |
| 19137 | Gm18117 | 0.0000 | No |
| 19138 | Gm18118 | 0.0000 | No |
| 19139 | Gm18122 | 0.0000 | No |
| 19140 | Gm18123 | 0.0000 | No |
| 19141 | Gm18124 | 0.0000 | No |
| 19142 | Gm18127 | 0.0000 | No |
| 19143 | Gm18128 | 0.0000 | No |
| 19144 | Gm18129 | 0.0000 | No |
| 19145 | Gm18131 | 0.0000 | No |
| 19146 | Gm18150 | 0.0000 | No |
| 19147 | Gm18159 | 0.0000 | No |
| 19148 | Gm18163 | 0.0000 | No |
| 19149 | Gm18177 | 0.0000 | No |
| 19150 | Gm1818  | 0.0000 | No |
| 19151 | Gm18180 | 0.0000 | No |
| 19152 | Gm18182 | 0.0000 | No |
| 19153 | Gm18183 | 0.0000 | No |
| 19154 | Gm18185 | 0.0000 | No |
| 19155 | Gm18186 | 0.0000 | No |
| 19156 | Gm18187 | 0.0000 | No |
| 19157 | Gm18190 | 0.0000 | No |
| 19158 | Gm18191 | 0.0000 | No |
| 19159 | Gm18192 | 0.0000 | No |
| 19160 | Gm18193 | 0.0000 | No |
| 19161 | Gm18195 | 0.0000 | No |
| 19162 | Gm18198 | 0.0000 | No |
| 19163 | Gm18199 | 0.0000 | No |
| 19164 | Gm18200 | 0.0000 | No |
| 19165 | Gm18201 | 0.0000 | No |
| 19166 | Gm18205 | 0.0000 | No |
| 19167 | Gm18206 | 0.0000 | No |
| 19168 | Gm18207 | 0.0000 | No |
| 19169 | Gm1821  | 0.0000 | No |
| 19170 | Gm18210 | 0.0000 | No |
| 19171 | Gm18212 | 0.0000 | No |
| 19172 | Gm18213 | 0.0000 | No |
| 19173 | Gm18215 | 0.0000 | No |
| 19174 | Gm18222 | 0.0000 | No |
| 19175 | Gm18227 | 0.0000 | No |
| 19176 | Gm18248 | 0.0000 | No |
| 19177 | Gm18254 | 0.0000 | No |
| 19178 | Gm18255 | 0.0000 | No |
| 19179 | Gm18256 | 0.0000 | No |

|       |         |        |    |
|-------|---------|--------|----|
| 19180 | Gm18258 | 0.0000 | No |
| 19181 | Gm1826  | 0.0000 | No |
| 19182 | Gm18268 | 0.0000 | No |
| 19183 | Gm18284 | 0.0000 | No |
| 19184 | Gm18289 | 0.0000 | No |
| 19185 | Gm18290 | 0.0000 | No |
| 19186 | Gm18291 | 0.0000 | No |
| 19187 | Gm18294 | 0.0000 | No |
| 19188 | Gm18299 | 0.0000 | No |
| 19189 | Gm18300 | 0.0000 | No |
| 19190 | Gm18301 | 0.0000 | No |
| 19191 | Gm18304 | 0.0000 | No |
| 19192 | Gm18306 | 0.0000 | No |
| 19193 | Gm18307 | 0.0000 | No |
| 19194 | Gm18310 | 0.0000 | No |
| 19195 | Gm18320 | 0.0000 | No |
| 19196 | Gm18325 | 0.0000 | No |
| 19197 | Gm18327 | 0.0000 | No |
| 19198 | Gm18330 | 0.0000 | No |
| 19199 | Gm18340 | 0.0000 | No |
| 19200 | Gm18342 | 0.0000 | No |
| 19201 | Gm18343 | 0.0000 | No |
| 19202 | Gm18348 | 0.0000 | No |
| 19203 | Gm18349 | 0.0000 | No |
| 19204 | Gm18350 | 0.0000 | No |
| 19205 | Gm18351 | 0.0000 | No |
| 19206 | Gm18352 | 0.0000 | No |
| 19207 | Gm18354 | 0.0000 | No |
| 19208 | Gm18357 | 0.0000 | No |
| 19209 | Gm18358 | 0.0000 | No |
| 19210 | Gm18359 | 0.0000 | No |
| 19211 | Gm18360 | 0.0000 | No |
| 19212 | Gm18367 | 0.0000 | No |
| 19213 | Gm18382 | 0.0000 | No |
| 19214 | Gm18384 | 0.0000 | No |
| 19215 | Gm18393 | 0.0000 | No |
| 19216 | Gm18396 | 0.0000 | No |
| 19217 | Gm18397 | 0.0000 | No |
| 19218 | Gm1840  | 0.0000 | No |
| 19219 | Gm18402 | 0.0000 | No |
| 19220 | Gm18403 | 0.0000 | No |
| 19221 | Gm18406 | 0.0000 | No |
| 19222 | Gm18407 | 0.0000 | No |
| 19223 | Gm18410 | 0.0000 | No |
| 19224 | Gm18414 | 0.0000 | No |
| 19225 | Gm18415 | 0.0000 | No |

|       |         |        |    |
|-------|---------|--------|----|
| 19226 | Gm18416 | 0.0000 | No |
| 19227 | Gm18417 | 0.0000 | No |
| 19228 | Gm18422 | 0.0000 | No |
| 19229 | Gm18423 | 0.0000 | No |
| 19230 | Gm18426 | 0.0000 | No |
| 19231 | Gm18428 | 0.0000 | No |
| 19232 | Gm18429 | 0.0000 | No |
| 19233 | Gm18432 | 0.0000 | No |
| 19234 | Gm18433 | 0.0000 | No |
| 19235 | Gm18443 | 0.0000 | No |
| 19236 | Gm18445 | 0.0000 | No |
| 19237 | Gm18448 | 0.0000 | No |
| 19238 | Gm18451 | 0.0000 | No |
| 19239 | Gm18452 | 0.0000 | No |
| 19240 | Gm18453 | 0.0000 | No |
| 19241 | Gm18455 | 0.0000 | No |
| 19242 | Gm18458 | 0.0000 | No |
| 19243 | Gm18460 | 0.0000 | No |
| 19244 | Gm18461 | 0.0000 | No |
| 19245 | Gm18462 | 0.0000 | No |
| 19246 | Gm18463 | 0.0000 | No |
| 19247 | Gm18464 | 0.0000 | No |
| 19248 | Gm18465 | 0.0000 | No |
| 19249 | Gm18466 | 0.0000 | No |
| 19250 | Gm18467 | 0.0000 | No |
| 19251 | Gm18468 | 0.0000 | No |
| 19252 | Gm18469 | 0.0000 | No |
| 19253 | Gm18470 | 0.0000 | No |
| 19254 | Gm18471 | 0.0000 | No |
| 19255 | Gm1848  | 0.0000 | No |
| 19256 | Gm18482 | 0.0000 | No |
| 19257 | Gm18485 | 0.0000 | No |
| 19258 | Gm18486 | 0.0000 | No |
| 19259 | Gm18489 | 0.0000 | No |
| 19260 | Gm18491 | 0.0000 | No |
| 19261 | Gm18493 | 0.0000 | No |
| 19262 | Gm18501 | 0.0000 | No |
| 19263 | Gm18505 | 0.0000 | No |
| 19264 | Gm18513 | 0.0000 | No |
| 19265 | Gm18520 | 0.0000 | No |
| 19266 | Gm18529 | 0.0000 | No |
| 19267 | Gm18537 | 0.0000 | No |
| 19268 | Gm18538 | 0.0000 | No |
| 19269 | Gm18539 | 0.0000 | No |
| 19270 | Gm18540 | 0.0000 | No |
| 19271 | Gm18546 | 0.0000 | No |

|       |         |        |    |
|-------|---------|--------|----|
| 19272 | Gm18547 | 0.0000 | No |
| 19273 | Gm18551 | 0.0000 | No |
| 19274 | Gm18552 | 0.0000 | No |
| 19275 | Gm18553 | 0.0000 | No |
| 19276 | Gm18555 | 0.0000 | No |
| 19277 | Gm18559 | 0.0000 | No |
| 19278 | Gm18560 | 0.0000 | No |
| 19279 | Gm18561 | 0.0000 | No |
| 19280 | Gm18562 | 0.0000 | No |
| 19281 | Gm18584 | 0.0000 | No |
| 19282 | Gm18588 | 0.0000 | No |
| 19283 | Gm18594 | 0.0000 | No |
| 19284 | Gm18597 | 0.0000 | No |
| 19285 | Gm18598 | 0.0000 | No |
| 19286 | Gm18599 | 0.0000 | No |
| 19287 | Gm18600 | 0.0000 | No |
| 19288 | Gm18602 | 0.0000 | No |
| 19289 | Gm18604 | 0.0000 | No |
| 19290 | Gm18609 | 0.0000 | No |
| 19291 | Gm1862  | 0.0000 | No |
| 19292 | Gm18635 | 0.0000 | No |
| 19293 | Gm18638 | 0.0000 | No |
| 19294 | Gm18639 | 0.0000 | No |
| 19295 | Gm18640 | 0.0000 | No |
| 19296 | Gm18642 | 0.0000 | No |
| 19297 | Gm18644 | 0.0000 | No |
| 19298 | Gm18645 | 0.0000 | No |
| 19299 | Gm18658 | 0.0000 | No |
| 19300 | Gm1866  | 0.0000 | No |
| 19301 | Gm18660 | 0.0000 | No |
| 19302 | Gm18665 | 0.0000 | No |
| 19303 | Gm18666 | 0.0000 | No |
| 19304 | Gm18667 | 0.0000 | No |
| 19305 | Gm18669 | 0.0000 | No |
| 19306 | Gm18672 | 0.0000 | No |
| 19307 | Gm18688 | 0.0000 | No |
| 19308 | Gm18689 | 0.0000 | No |
| 19309 | Gm18690 | 0.0000 | No |
| 19310 | Gm18691 | 0.0000 | No |
| 19311 | Gm18697 | 0.0000 | No |
| 19312 | Gm18699 | 0.0000 | No |
| 19313 | Gm18700 | 0.0000 | No |
| 19314 | Gm18701 | 0.0000 | No |
| 19315 | Gm18702 | 0.0000 | No |
| 19316 | Gm18706 | 0.0000 | No |
| 19317 | Gm18709 | 0.0000 | No |

|       |         |        |    |
|-------|---------|--------|----|
| 19318 | Gm18711 | 0.0000 | No |
| 19319 | Gm18717 | 0.0000 | No |
| 19320 | Gm18719 | 0.0000 | No |
| 19321 | Gm18727 | 0.0000 | No |
| 19322 | Gm18728 | 0.0000 | No |
| 19323 | Gm18733 | 0.0000 | No |
| 19324 | Gm18734 | 0.0000 | No |
| 19325 | Gm18737 | 0.0000 | No |
| 19326 | Gm18747 | 0.0000 | No |
| 19327 | Gm18751 | 0.0000 | No |
| 19328 | Gm18752 | 0.0000 | No |
| 19329 | Gm18753 | 0.0000 | No |
| 19330 | Gm18765 | 0.0000 | No |
| 19331 | Gm18766 | 0.0000 | No |
| 19332 | Gm18775 | 0.0000 | No |
| 19333 | Gm18776 | 0.0000 | No |
| 19334 | Gm18779 | 0.0000 | No |
| 19335 | Gm18780 | 0.0000 | No |
| 19336 | Gm18782 | 0.0000 | No |
| 19337 | Gm18791 | 0.0000 | No |
| 19338 | Gm18797 | 0.0000 | No |
| 19339 | Gm18798 | 0.0000 | No |
| 19340 | Gm18799 | 0.0000 | No |
| 19341 | Gm18800 | 0.0000 | No |
| 19342 | Gm18801 | 0.0000 | No |
| 19343 | Gm18802 | 0.0000 | No |
| 19344 | Gm18805 | 0.0000 | No |
| 19345 | Gm18806 | 0.0000 | No |
| 19346 | Gm18808 | 0.0000 | No |
| 19347 | Gm18821 | 0.0000 | No |
| 19348 | Gm18822 | 0.0000 | No |
| 19349 | Gm18827 | 0.0000 | No |
| 19350 | Gm18829 | 0.0000 | No |
| 19351 | Gm18830 | 0.0000 | No |
| 19352 | Gm18839 | 0.0000 | No |
| 19353 | Gm18840 | 0.0000 | No |
| 19354 | Gm18843 | 0.0000 | No |
| 19355 | Gm18848 | 0.0000 | No |
| 19356 | Gm18849 | 0.0000 | No |
| 19357 | Gm18850 | 0.0000 | No |
| 19358 | Gm18851 | 0.0000 | No |
| 19359 | Gm18852 | 0.0000 | No |
| 19360 | Gm18853 | 0.0000 | No |
| 19361 | Gm18854 | 0.0000 | No |
| 19362 | Gm18855 | 0.0000 | No |
| 19363 | Gm18856 | 0.0000 | No |

|       |         |        |    |
|-------|---------|--------|----|
| 19364 | Gm18859 | 0.0000 | No |
| 19365 | Gm18861 | 0.0000 | No |
| 19366 | Gm18862 | 0.0000 | No |
| 19367 | Gm18864 | 0.0000 | No |
| 19368 | Gm18865 | 0.0000 | No |
| 19369 | Gm18867 | 0.0000 | No |
| 19370 | Gm18875 | 0.0000 | No |
| 19371 | Gm18877 | 0.0000 | No |
| 19372 | Gm18889 | 0.0000 | No |
| 19373 | Gm18893 | 0.0000 | No |
| 19374 | Gm18894 | 0.0000 | No |
| 19375 | Gm18900 | 0.0000 | No |
| 19376 | Gm18901 | 0.0000 | No |
| 19377 | Gm18905 | 0.0000 | No |
| 19378 | Gm18908 | 0.0000 | No |
| 19379 | Gm18913 | 0.0000 | No |
| 19380 | Gm18943 | 0.0000 | No |
| 19381 | Gm18944 | 0.0000 | No |
| 19382 | Gm18953 | 0.0000 | No |
| 19383 | Gm18957 | 0.0000 | No |
| 19384 | Gm18958 | 0.0000 | No |
| 19385 | Gm18959 | 0.0000 | No |
| 19386 | Gm18964 | 0.0000 | No |
| 19387 | Gm18969 | 0.0000 | No |
| 19388 | Gm18970 | 0.0000 | No |
| 19389 | Gm18971 | 0.0000 | No |
| 19390 | Gm18973 | 0.0000 | No |
| 19391 | Gm18980 | 0.0000 | No |
| 19392 | Gm18982 | 0.0000 | No |
| 19393 | Gm18984 | 0.0000 | No |
| 19394 | Gm18985 | 0.0000 | No |
| 19395 | Gm18988 | 0.0000 | No |
| 19396 | Gm18991 | 0.0000 | No |
| 19397 | Gm19002 | 0.0000 | No |
| 19398 | Gm19013 | 0.0000 | No |
| 19399 | Gm19014 | 0.0000 | No |
| 19400 | Gm19015 | 0.0000 | No |
| 19401 | Gm19024 | 0.0000 | No |
| 19402 | Gm19026 | 0.0000 | No |
| 19403 | Gm19029 | 0.0000 | No |
| 19404 | Gm19032 | 0.0000 | No |
| 19405 | Gm19033 | 0.0000 | No |
| 19406 | Gm19035 | 0.0000 | No |
| 19407 | Gm19039 | 0.0000 | No |
| 19408 | Gm19040 | 0.0000 | No |
| 19409 | Gm19058 | 0.0000 | No |

|       |         |        |    |
|-------|---------|--------|----|
| 19410 | Gm19060 | 0.0000 | No |
| 19411 | Gm19065 | 0.0000 | No |
| 19412 | Gm19066 | 0.0000 | No |
| 19413 | Gm19078 | 0.0000 | No |
| 19414 | Gm19080 | 0.0000 | No |
| 19415 | Gm19085 | 0.0000 | No |
| 19416 | Gm19086 | 0.0000 | No |
| 19417 | Gm19087 | 0.0000 | No |
| 19418 | Gm19088 | 0.0000 | No |
| 19419 | Gm19091 | 0.0000 | No |
| 19420 | Gm19092 | 0.0000 | No |
| 19421 | Gm19094 | 0.0000 | No |
| 19422 | Gm19104 | 0.0000 | No |
| 19423 | Gm19114 | 0.0000 | No |
| 19424 | Gm19123 | 0.0000 | No |
| 19425 | Gm19124 | 0.0000 | No |
| 19426 | Gm19126 | 0.0000 | No |
| 19427 | Gm19127 | 0.0000 | No |
| 19428 | Gm19131 | 0.0000 | No |
| 19429 | Gm19136 | 0.0000 | No |
| 19430 | Gm19147 | 0.0000 | No |
| 19431 | Gm19148 | 0.0000 | No |
| 19432 | Gm19164 | 0.0000 | No |
| 19433 | Gm19165 | 0.0000 | No |
| 19434 | Gm19166 | 0.0000 | No |
| 19435 | Gm19172 | 0.0000 | No |
| 19436 | Gm19173 | 0.0000 | No |
| 19437 | Gm19175 | 0.0000 | No |
| 19438 | Gm19177 | 0.0000 | No |
| 19439 | Gm19182 | 0.0000 | No |
| 19440 | Gm19184 | 0.0000 | No |
| 19441 | Gm19187 | 0.0000 | No |
| 19442 | Gm19193 | 0.0000 | No |
| 19443 | Gm19194 | 0.0000 | No |
| 19444 | Gm19196 | 0.0000 | No |
| 19445 | Gm19200 | 0.0000 | No |
| 19446 | Gm19201 | 0.0000 | No |
| 19447 | Gm19202 | 0.0000 | No |
| 19448 | Gm19203 | 0.0000 | No |
| 19449 | Gm19206 | 0.0000 | No |
| 19450 | Gm19210 | 0.0000 | No |
| 19451 | Gm19211 | 0.0000 | No |
| 19452 | Gm19214 | 0.0000 | No |
| 19453 | Gm19224 | 0.0000 | No |
| 19454 | Gm19231 | 0.0000 | No |
| 19455 | Gm19232 | 0.0000 | No |

|       |         |        |    |
|-------|---------|--------|----|
| 19456 | Gm19237 | 0.0000 | No |
| 19457 | Gm19243 | 0.0000 | No |
| 19458 | Gm19244 | 0.0000 | No |
| 19459 | Gm19246 | 0.0000 | No |
| 19460 | Gm19248 | 0.0000 | No |
| 19461 | Gm19252 | 0.0000 | No |
| 19462 | Gm19254 | 0.0000 | No |
| 19463 | Gm19257 | 0.0000 | No |
| 19464 | Gm19261 | 0.0000 | No |
| 19465 | Gm19265 | 0.0000 | No |
| 19466 | Gm19269 | 0.0000 | No |
| 19467 | Gm19272 | 0.0000 | No |
| 19468 | Gm19280 | 0.0000 | No |
| 19469 | Gm19287 | 0.0000 | No |
| 19470 | Gm19301 | 0.0000 | No |
| 19471 | Gm19325 | 0.0000 | No |
| 19472 | Gm19335 | 0.0000 | No |
| 19473 | Gm19345 | 0.0000 | No |
| 19474 | Gm19353 | 0.0000 | No |
| 19475 | Gm19366 | 0.0000 | No |
| 19476 | Gm19402 | 0.0000 | No |
| 19477 | Gm19409 | 0.0000 | No |
| 19478 | Gm19410 | 0.0000 | No |
| 19479 | Gm19412 | 0.0000 | No |
| 19480 | Gm19418 | 0.0000 | No |
| 19481 | Gm19426 | 0.0000 | No |
| 19482 | Gm19427 | 0.0000 | No |
| 19483 | Gm19430 | 0.0000 | No |
| 19484 | Gm19434 | 0.0000 | No |
| 19485 | Gm19445 | 0.0000 | No |
| 19486 | Gm19459 | 0.0000 | No |
| 19487 | Gm19480 | 0.0000 | No |
| 19488 | Gm19498 | 0.0000 | No |
| 19489 | Gm19503 | 0.0000 | No |
| 19490 | Gm19514 | 0.0000 | No |
| 19491 | Gm19541 | 0.0000 | No |
| 19492 | Gm19552 | 0.0000 | No |
| 19493 | Gm19553 | 0.0000 | No |
| 19494 | Gm19557 | 0.0000 | No |
| 19495 | Gm19560 | 0.0000 | No |
| 19496 | Gm19566 | 0.0000 | No |
| 19497 | Gm19569 | 0.0000 | No |
| 19498 | Gm19582 | 0.0000 | No |
| 19499 | Gm19583 | 0.0000 | No |
| 19500 | Gm19585 | 0.0000 | No |
| 19501 | Gm19587 | 0.0000 | No |



|       |         |        |    |
|-------|---------|--------|----|
| 19502 | Gm19589 | 0.0000 | No |
| 19503 | Gm19590 | 0.0000 | No |
| 19504 | Gm19596 | 0.0000 | No |
| 19505 | Gm19617 | 0.0000 | No |
| 19506 | Gm19619 | 0.0000 | No |
| 19507 | Gm19620 | 0.0000 | No |
| 19508 | Gm19637 | 0.0000 | No |
| 19509 | Gm19641 | 0.0000 | No |
| 19510 | Gm19649 | 0.0000 | No |
| 19511 | Gm1965  | 0.0000 | No |
| 19512 | Gm19658 | 0.0000 | No |
| 19513 | Gm1966  | 0.0000 | No |
| 19514 | Gm19666 | 0.0000 | No |
| 19515 | Gm19667 | 0.0000 | No |
| 19516 | Gm1968  | 0.0000 | No |
| 19517 | Gm19680 | 0.0000 | No |
| 19518 | Gm19683 | 0.0000 | No |
| 19519 | Gm19684 | 0.0000 | No |
| 19520 | Gm1969  | 0.0000 | No |
| 19521 | Gm19692 | 0.0000 | No |
| 19522 | Gm19694 | 0.0000 | No |
| 19523 | Gm19705 | 0.0000 | No |
| 19524 | Gm19708 | 0.0000 | No |
| 19525 | Gm19710 | 0.0000 | No |
| 19526 | Gm19719 | 0.0000 | No |
| 19527 | Gm1972  | 0.0000 | No |
| 19528 | Gm19721 | 0.0000 | No |
| 19529 | Gm19726 | 0.0000 | No |
| 19530 | Gm19739 | 0.0000 | No |
| 19531 | Gm19757 | 0.0000 | No |
| 19532 | Gm1976  | 0.0000 | No |
| 19533 | Gm19764 | 0.0000 | No |
| 19534 | Gm19774 | 0.0000 | No |
| 19535 | Gm19777 | 0.0000 | No |
| 19536 | Gm1979  | 0.0000 | No |
| 19537 | Gm19798 | 0.0000 | No |
| 19538 | Gm1980  | 0.0000 | No |
| 19539 | Gm19807 | 0.0000 | No |
| 19540 | Gm19815 | 0.0000 | No |
| 19541 | Gm19817 | 0.0000 | No |
| 19542 | Gm1982  | 0.0000 | No |
| 19543 | Gm19840 | 0.0000 | No |
| 19544 | Gm19843 | 0.0000 | No |
| 19545 | Gm19855 | 0.0000 | No |
| 19546 | Gm19863 | 0.0000 | No |
| 19547 | Gm19872 | 0.0000 | No |

|       |         |        |    |
|-------|---------|--------|----|
| 19548 | Gm1989  | 0.0000 | No |
| 19549 | Gm19891 | 0.0000 | No |
| 19550 | Gm19898 | 0.0000 | No |
| 19551 | Gm19900 | 0.0000 | No |
| 19552 | Gm19901 | 0.0000 | No |
| 19553 | Gm19918 | 0.0000 | No |
| 19554 | Gm1992  | 0.0000 | No |
| 19555 | Gm19921 | 0.0000 | No |
| 19556 | Gm19927 | 0.0000 | No |
| 19557 | Gm1993  | 0.0000 | No |
| 19558 | Gm19931 | 0.0000 | No |
| 19559 | Gm19932 | 0.0000 | No |
| 19560 | Gm19938 | 0.0000 | No |
| 19561 | Gm19950 | 0.0000 | No |
| 19562 | Gm19965 | 0.0000 | No |
| 19563 | Gm19967 | 0.0000 | No |
| 19564 | Gm2000  | 0.0000 | No |
| 19565 | Gm2001  | 0.0000 | No |
| 19566 | Gm2003  | 0.0000 | No |
| 19567 | Gm20033 | 0.0000 | No |
| 19568 | Gm20036 | 0.0000 | No |
| 19569 | Gm2004  | 0.0000 | No |
| 19570 | Gm20045 | 0.0000 | No |
| 19571 | Gm2005  | 0.0000 | No |
| 19572 | Gm20052 | 0.0000 | No |
| 19573 | Gm20056 | 0.0000 | No |
| 19574 | Gm20058 | 0.0000 | No |
| 19575 | Gm2007  | 0.0000 | No |
| 19576 | Gm20072 | 0.0000 | No |
| 19577 | Gm20074 | 0.0000 | No |
| 19578 | Gm20089 | 0.0000 | No |
| 19579 | Gm20091 | 0.0000 | No |
| 19580 | Gm20109 | 0.0000 | No |
| 19581 | Gm2011  | 0.0000 | No |
| 19582 | Gm20111 | 0.0000 | No |
| 19583 | Gm20118 | 0.0000 | No |
| 19584 | Gm2012  | 0.0000 | No |
| 19585 | Gm20125 | 0.0000 | No |
| 19586 | Gm20128 | 0.0000 | No |
| 19587 | Gm20136 | 0.0000 | No |
| 19588 | Gm20144 | 0.0000 | No |
| 19589 | Gm20156 | 0.0000 | No |
| 19590 | Gm20159 | 0.0000 | No |
| 19591 | Gm2016  | 0.0000 | No |
| 19592 | Gm20162 | 0.0000 | No |
| 19593 | Gm20172 | 0.0000 | No |

|       |         |        |    |
|-------|---------|--------|----|
| 19594 | Gm2018  | 0.0000 | No |
| 19595 | Gm20186 | 0.0000 | No |
| 19596 | Gm2020  | 0.0000 | No |
| 19597 | Gm20203 | 0.0000 | No |
| 19598 | Gm2021  | 0.0000 | No |
| 19599 | Gm20219 | 0.0000 | No |
| 19600 | Gm2022  | 0.0000 | No |
| 19601 | Gm20239 | 0.0000 | No |
| 19602 | Gm20257 | 0.0000 | No |
| 19603 | Gm2026  | 0.0000 | No |
| 19604 | Gm20268 | 0.0000 | No |
| 19605 | Gm20274 | 0.0000 | No |
| 19606 | Gm20287 | 0.0000 | No |
| 19607 | Gm2030  | 0.0000 | No |
| 19608 | Gm20302 | 0.0000 | No |
| 19609 | Gm20305 | 0.0000 | No |
| 19610 | Gm20319 | 0.0000 | No |
| 19611 | Gm20324 | 0.0000 | No |
| 19612 | Gm2033  | 0.0000 | No |
| 19613 | Gm20342 | 0.0000 | No |
| 19614 | Gm20345 | 0.0000 | No |
| 19615 | Gm2035  | 0.0000 | No |
| 19616 | Gm20356 | 0.0000 | No |
| 19617 | Gm20362 | 0.0000 | No |
| 19618 | Gm20371 | 0.0000 | No |
| 19619 | Gm20379 | 0.0000 | No |
| 19620 | Gm20382 | 0.0000 | No |
| 19621 | Gm20383 | 0.0000 | No |
| 19622 | Gm20386 | 0.0000 | No |
| 19623 | Gm20387 | 0.0000 | No |
| 19624 | Gm20388 | 0.0000 | No |
| 19625 | Gm20389 | 0.0000 | No |
| 19626 | Gm20390 | 0.0000 | No |
| 19627 | Gm20391 | 0.0000 | No |
| 19628 | Gm20392 | 0.0000 | No |
| 19629 | Gm20394 | 0.0000 | No |
| 19630 | Gm20395 | 0.0000 | No |
| 19631 | Gm20396 | 0.0000 | No |
| 19632 | Gm20397 | 0.0000 | No |
| 19633 | Gm20399 | 0.0000 | No |
| 19634 | Gm2040  | 0.0000 | No |
| 19635 | Gm20400 | 0.0000 | No |
| 19636 | Gm20401 | 0.0000 | No |
| 19637 | Gm20402 | 0.0000 | No |
| 19638 | Gm20403 | 0.0000 | No |
| 19639 | Gm20404 | 0.0000 | No |

|       |         |        |    |
|-------|---------|--------|----|
| 19640 | Gm20405 | 0.0000 | No |
| 19641 | Gm20406 | 0.0000 | No |
| 19642 | Gm20407 | 0.0000 | No |
| 19643 | Gm20409 | 0.0000 | No |
| 19644 | Gm20412 | 0.0000 | No |
| 19645 | Gm20414 | 0.0000 | No |
| 19646 | Gm20415 | 0.0000 | No |
| 19647 | Gm20416 | 0.0000 | No |
| 19648 | Gm20417 | 0.0000 | No |
| 19649 | Gm2042  | 0.0000 | No |
| 19650 | Gm20420 | 0.0000 | No |
| 19651 | Gm20422 | 0.0000 | No |
| 19652 | Gm20425 | 0.0000 | No |
| 19653 | Gm20426 | 0.0000 | No |
| 19654 | Gm20427 | 0.0000 | No |
| 19655 | Gm20428 | 0.0000 | No |
| 19656 | Gm20429 | 0.0000 | No |
| 19657 | Gm20430 | 0.0000 | No |
| 19658 | Gm20431 | 0.0000 | No |
| 19659 | Gm20432 | 0.0000 | No |
| 19660 | Gm20438 | 0.0000 | No |
| 19661 | Gm2044  | 0.0000 | No |
| 19662 | Gm20441 | 0.0000 | No |
| 19663 | Gm20442 | 0.0000 | No |
| 19664 | Gm20443 | 0.0000 | No |
| 19665 | Gm20444 | 0.0000 | No |
| 19666 | Gm20445 | 0.0000 | No |
| 19667 | Gm20450 | 0.0000 | No |
| 19668 | Gm20451 | 0.0000 | No |
| 19669 | Gm20452 | 0.0000 | No |
| 19670 | Gm20453 | 0.0000 | No |
| 19671 | Gm20455 | 0.0000 | No |
| 19672 | Gm20456 | 0.0000 | No |
| 19673 | Gm20457 | 0.0000 | No |
| 19674 | Gm20458 | 0.0000 | No |
| 19675 | Gm20462 | 0.0000 | No |
| 19676 | Gm20463 | 0.0000 | No |
| 19677 | Gm20468 | 0.0000 | No |
| 19678 | Gm20470 | 0.0000 | No |
| 19679 | Gm20471 | 0.0000 | No |
| 19680 | Gm20473 | 0.0000 | No |
| 19681 | Gm20474 | 0.0000 | No |
| 19682 | Gm20475 | 0.0000 | No |
| 19683 | Gm20476 | 0.0000 | No |
| 19684 | Gm20477 | 0.0000 | No |
| 19685 | Gm20478 | 0.0000 | No |

|       |         |        |    |
|-------|---------|--------|----|
| 19686 | Gm20479 | 0.0000 | No |
| 19687 | Gm20480 | 0.0000 | No |
| 19688 | Gm20481 | 0.0000 | No |
| 19689 | Gm20482 | 0.0000 | No |
| 19690 | Gm20483 | 0.0000 | No |
| 19691 | Gm20486 | 0.0000 | No |
| 19692 | Gm20488 | 0.0000 | No |
| 19693 | Gm20489 | 0.0000 | No |
| 19694 | Gm20490 | 0.0000 | No |
| 19695 | Gm20492 | 0.0000 | No |
| 19696 | Gm20493 | 0.0000 | No |
| 19697 | Gm20495 | 0.0000 | No |
| 19698 | Gm20496 | 0.0000 | No |
| 19699 | Gm20497 | 0.0000 | No |
| 19700 | Gm20498 | 0.0000 | No |
| 19701 | Gm20499 | 0.0000 | No |
| 19702 | Gm20500 | 0.0000 | No |
| 19703 | Gm20503 | 0.0000 | No |
| 19704 | Gm20506 | 0.0000 | No |
| 19705 | Gm20507 | 0.0000 | No |
| 19706 | Gm20508 | 0.0000 | No |
| 19707 | Gm20509 | 0.0000 | No |
| 19708 | Gm20511 | 0.0000 | No |
| 19709 | Gm20512 | 0.0000 | No |
| 19710 | Gm20513 | 0.0000 | No |
| 19711 | Gm20515 | 0.0000 | No |
| 19712 | Gm20517 | 0.0000 | No |
| 19713 | Gm20518 | 0.0000 | No |
| 19714 | Gm20519 | 0.0000 | No |
| 19715 | Gm20521 | 0.0000 | No |
| 19716 | Gm20522 | 0.0000 | No |
| 19717 | Gm20523 | 0.0000 | No |
| 19718 | Gm20524 | 0.0000 | No |
| 19719 | Gm20525 | 0.0000 | No |
| 19720 | Gm20526 | 0.0000 | No |
| 19721 | Gm20528 | 0.0000 | No |
| 19722 | Gm20529 | 0.0000 | No |
| 19723 | Gm20530 | 0.0000 | No |
| 19724 | Gm20531 | 0.0000 | No |
| 19725 | Gm20532 | 0.0000 | No |
| 19726 | Gm20534 | 0.0000 | No |
| 19727 | Gm20535 | 0.0000 | No |
| 19728 | Gm20536 | 0.0000 | No |
| 19729 | Gm20537 | 0.0000 | No |
| 19730 | Gm20538 | 0.0000 | No |
| 19731 | Gm20539 | 0.0000 | No |

|       |         |        |    |
|-------|---------|--------|----|
| 19732 | Gm20540 | 0.0000 | No |
| 19733 | Gm20541 | 0.0000 | No |
| 19734 | Gm20542 | 0.0000 | No |
| 19735 | Gm20543 | 0.0000 | No |
| 19736 | Gm20544 | 0.0000 | No |
| 19737 | Gm20545 | 0.0000 | No |
| 19738 | Gm20546 | 0.0000 | No |
| 19739 | Gm20547 | 0.0000 | No |
| 19740 | Gm20548 | 0.0000 | No |
| 19741 | Gm20549 | 0.0000 | No |
| 19742 | Gm20553 | 0.0000 | No |
| 19743 | Gm20554 | 0.0000 | No |
| 19744 | Gm20557 | 0.0000 | No |
| 19745 | Gm20559 | 0.0000 | No |
| 19746 | Gm2056  | 0.0000 | No |
| 19747 | Gm20561 | 0.0000 | No |
| 19748 | Gm20563 | 0.0000 | No |
| 19749 | Gm20568 | 0.0000 | No |
| 19750 | Gm20574 | 0.0000 | No |
| 19751 | Gm2058  | 0.0000 | No |
| 19752 | Gm20587 | 0.0000 | No |
| 19753 | Gm20589 | 0.0000 | No |
| 19754 | Gm20594 | 0.0000 | No |
| 19755 | Gm20604 | 0.0000 | No |
| 19756 | Gm20605 | 0.0000 | No |
| 19757 | Gm20609 | 0.0000 | No |
| 19758 | Gm2061  | 0.0000 | No |
| 19759 | Gm20611 | 0.0000 | No |
| 19760 | Gm20612 | 0.0000 | No |
| 19761 | Gm20613 | 0.0000 | No |
| 19762 | Gm20614 | 0.0000 | No |
| 19763 | Gm20615 | 0.0000 | No |
| 19764 | Gm20616 | 0.0000 | No |
| 19765 | Gm20618 | 0.0000 | No |
| 19766 | Gm20619 | 0.0000 | No |
| 19767 | Gm20621 | 0.0000 | No |
| 19768 | Gm20625 | 0.0000 | No |
| 19769 | Gm20627 | 0.0000 | No |
| 19770 | Gm20628 | 0.0000 | No |
| 19771 | Gm20630 | 0.0000 | No |
| 19772 | Gm20631 | 0.0000 | No |
| 19773 | Gm20632 | 0.0000 | No |
| 19774 | Gm20633 | 0.0000 | No |
| 19775 | Gm20634 | 0.0000 | No |
| 19776 | Gm20635 | 0.0000 | No |
| 19777 | Gm20636 | 0.0000 | No |

|       |         |        |    |
|-------|---------|--------|----|
| 19778 | Gm20637 | 0.0000 | No |
| 19779 | Gm20638 | 0.0000 | No |
| 19780 | Gm20641 | 0.0000 | No |
| 19781 | Gm20642 | 0.0000 | No |
| 19782 | Gm20643 | 0.0000 | No |
| 19783 | Gm20648 | 0.0000 | No |
| 19784 | Gm20649 | 0.0000 | No |
| 19785 | Gm2065  | 0.0000 | No |
| 19786 | Gm20650 | 0.0000 | No |
| 19787 | Gm20651 | 0.0000 | No |
| 19788 | Gm20652 | 0.0000 | No |
| 19789 | Gm20655 | 0.0000 | No |
| 19790 | Gm20656 | 0.0000 | No |
| 19791 | Gm20657 | 0.0000 | No |
| 19792 | Gm20658 | 0.0000 | No |
| 19793 | Gm20659 | 0.0000 | No |
| 19794 | Gm2066  | 0.0000 | No |
| 19795 | Gm20660 | 0.0000 | No |
| 19796 | Gm20661 | 0.0000 | No |
| 19797 | Gm20662 | 0.0000 | No |
| 19798 | Gm20663 | 0.0000 | No |
| 19799 | Gm20667 | 0.0000 | No |
| 19800 | Gm20671 | 0.0000 | No |
| 19801 | Gm20672 | 0.0000 | No |
| 19802 | Gm20673 | 0.0000 | No |
| 19803 | Gm20674 | 0.0000 | No |
| 19804 | Gm20675 | 0.0000 | No |
| 19805 | Gm20678 | 0.0000 | No |
| 19806 | Gm20680 | 0.0000 | No |
| 19807 | Gm20681 | 0.0000 | No |
| 19808 | Gm20682 | 0.0000 | No |
| 19809 | Gm20683 | 0.0000 | No |
| 19810 | Gm20684 | 0.0000 | No |
| 19811 | Gm20685 | 0.0000 | No |
| 19812 | Gm20686 | 0.0000 | No |
| 19813 | Gm20687 | 0.0000 | No |
| 19814 | Gm20688 | 0.0000 | No |
| 19815 | Gm20689 | 0.0000 | No |
| 19816 | Gm20692 | 0.0000 | No |
| 19817 | Gm20693 | 0.0000 | No |
| 19818 | Gm20694 | 0.0000 | No |
| 19819 | Gm20695 | 0.0000 | No |
| 19820 | Gm20696 | 0.0000 | No |
| 19821 | Gm20698 | 0.0000 | No |
| 19822 | Gm20699 | 0.0000 | No |
| 19823 | Gm20700 | 0.0000 | No |

|       |         |        |    |
|-------|---------|--------|----|
| 19824 | Gm20701 | 0.0000 | No |
| 19825 | Gm20702 | 0.0000 | No |
| 19826 | Gm20703 | 0.0000 | No |
| 19827 | Gm20705 | 0.0000 | No |
| 19828 | Gm20706 | 0.0000 | No |
| 19829 | Gm20707 | 0.0000 | No |
| 19830 | Gm20708 | 0.0000 | No |
| 19831 | Gm2071  | 0.0000 | No |
| 19832 | Gm20712 | 0.0000 | No |
| 19833 | Gm20713 | 0.0000 | No |
| 19834 | Gm20714 | 0.0000 | No |
| 19835 | Gm20715 | 0.0000 | No |
| 19836 | Gm20717 | 0.0000 | No |
| 19837 | Gm20718 | 0.0000 | No |
| 19838 | Gm20721 | 0.0000 | No |
| 19839 | Gm20726 | 0.0000 | No |
| 19840 | Gm20730 | 0.0000 | No |
| 19841 | Gm20731 | 0.0000 | No |
| 19842 | Gm20732 | 0.0000 | No |
| 19843 | Gm20736 | 0.0000 | No |
| 19844 | Gm20737 | 0.0000 | No |
| 19845 | Gm20738 | 0.0000 | No |
| 19846 | Gm20744 | 0.0000 | No |
| 19847 | Gm20747 | 0.0000 | No |
| 19848 | Gm20749 | 0.0000 | No |
| 19849 | Gm2075  | 0.0000 | No |
| 19850 | Gm20750 | 0.0000 | No |
| 19851 | Gm20751 | 0.0000 | No |
| 19852 | Gm20753 | 0.0000 | No |
| 19853 | Gm20754 | 0.0000 | No |
| 19854 | Gm20755 | 0.0000 | No |
| 19855 | Gm20756 | 0.0000 | No |
| 19856 | Gm20757 | 0.0000 | No |
| 19857 | Gm2076  | 0.0000 | No |
| 19858 | Gm20760 | 0.0000 | No |
| 19859 | Gm20765 | 0.0000 | No |
| 19860 | Gm20768 | 0.0000 | No |
| 19861 | Gm2077  | 0.0000 | No |
| 19862 | Gm20770 | 0.0000 | No |
| 19863 | Gm20772 | 0.0000 | No |
| 19864 | Gm20773 | 0.0000 | No |
| 19865 | Gm20775 | 0.0000 | No |
| 19866 | Gm20776 | 0.0000 | No |
| 19867 | Gm20777 | 0.0000 | No |
| 19868 | Gm20781 | 0.0000 | No |
| 19869 | Gm20784 | 0.0000 | No |



|       |         |        |    |
|-------|---------|--------|----|
| 19870 | Gm20788 | 0.0000 | No |
| 19871 | Gm20791 | 0.0000 | No |
| 19872 | Gm20792 | 0.0000 | No |
| 19873 | Gm20793 | 0.0000 | No |
| 19874 | Gm20794 | 0.0000 | No |
| 19875 | Gm20795 | 0.0000 | No |
| 19876 | Gm20797 | 0.0000 | No |
| 19877 | Gm20798 | 0.0000 | No |
| 19878 | Gm20799 | 0.0000 | No |
| 19879 | Gm20800 | 0.0000 | No |
| 19880 | Gm20801 | 0.0000 | No |
| 19881 | Gm20802 | 0.0000 | No |
| 19882 | Gm20803 | 0.0000 | No |
| 19883 | Gm20804 | 0.0000 | No |
| 19884 | Gm20805 | 0.0000 | No |
| 19885 | Gm20806 | 0.0000 | No |
| 19886 | Gm20807 | 0.0000 | No |
| 19887 | Gm20808 | 0.0000 | No |
| 19888 | Gm20809 | 0.0000 | No |
| 19889 | Gm20810 | 0.0000 | No |
| 19890 | Gm20811 | 0.0000 | No |
| 19891 | Gm20812 | 0.0000 | No |
| 19892 | Gm20813 | 0.0000 | No |
| 19893 | Gm20814 | 0.0000 | No |
| 19894 | Gm20815 | 0.0000 | No |
| 19895 | Gm20816 | 0.0000 | No |
| 19896 | Gm20817 | 0.0000 | No |
| 19897 | Gm20818 | 0.0000 | No |
| 19898 | Gm20819 | 0.0000 | No |
| 19899 | Gm20820 | 0.0000 | No |
| 19900 | Gm20821 | 0.0000 | No |
| 19901 | Gm20822 | 0.0000 | No |
| 19902 | Gm20823 | 0.0000 | No |
| 19903 | Gm20824 | 0.0000 | No |
| 19904 | Gm20825 | 0.0000 | No |
| 19905 | Gm20826 | 0.0000 | No |
| 19906 | Gm20827 | 0.0000 | No |
| 19907 | Gm20828 | 0.0000 | No |
| 19908 | Gm20830 | 0.0000 | No |
| 19909 | Gm20831 | 0.0000 | No |
| 19910 | Gm20832 | 0.0000 | No |
| 19911 | Gm20833 | 0.0000 | No |
| 19912 | Gm20834 | 0.0000 | No |
| 19913 | Gm20835 | 0.0000 | No |
| 19914 | Gm20836 | 0.0000 | No |
| 19915 | Gm20837 | 0.0000 | No |

|       |         |        |    |
|-------|---------|--------|----|
| 19916 | Gm20838 | 0.0000 | No |
| 19917 | Gm20840 | 0.0000 | No |
| 19918 | Gm20841 | 0.0000 | No |
| 19919 | Gm20842 | 0.0000 | No |
| 19920 | Gm20843 | 0.0000 | No |
| 19921 | Gm20844 | 0.0000 | No |
| 19922 | Gm20846 | 0.0000 | No |
| 19923 | Gm20847 | 0.0000 | No |
| 19924 | Gm20848 | 0.0000 | No |
| 19925 | Gm20849 | 0.0000 | No |
| 19926 | Gm20850 | 0.0000 | No |
| 19927 | Gm20851 | 0.0000 | No |
| 19928 | Gm20852 | 0.0000 | No |
| 19929 | Gm20853 | 0.0000 | No |
| 19930 | Gm20854 | 0.0000 | No |
| 19931 | Gm20855 | 0.0000 | No |
| 19932 | Gm20856 | 0.0000 | No |
| 19933 | Gm20857 | 0.0000 | No |
| 19934 | Gm20858 | 0.0000 | No |
| 19935 | Gm20859 | 0.0000 | No |
| 19936 | Gm20860 | 0.0000 | No |
| 19937 | Gm20861 | 0.0000 | No |
| 19938 | Gm20862 | 0.0000 | No |
| 19939 | Gm20863 | 0.0000 | No |
| 19940 | Gm20864 | 0.0000 | No |
| 19941 | Gm20865 | 0.0000 | No |
| 19942 | Gm20866 | 0.0000 | No |
| 19943 | Gm20867 | 0.0000 | No |
| 19944 | Gm20868 | 0.0000 | No |
| 19945 | Gm20869 | 0.0000 | No |
| 19946 | Gm2087  | 0.0000 | No |
| 19947 | Gm20870 | 0.0000 | No |
| 19948 | Gm20871 | 0.0000 | No |
| 19949 | Gm20873 | 0.0000 | No |
| 19950 | Gm20874 | 0.0000 | No |
| 19951 | Gm20877 | 0.0000 | No |
| 19952 | Gm20878 | 0.0000 | No |
| 19953 | Gm20879 | 0.0000 | No |
| 19954 | Gm20880 | 0.0000 | No |
| 19955 | Gm20881 | 0.0000 | No |
| 19956 | Gm20882 | 0.0000 | No |
| 19957 | Gm20883 | 0.0000 | No |
| 19958 | Gm20884 | 0.0000 | No |
| 19959 | Gm20885 | 0.0000 | No |
| 19960 | Gm20886 | 0.0000 | No |
| 19961 | Gm20887 | 0.0000 | No |

|       |         |        |    |
|-------|---------|--------|----|
| 19962 | Gm20888 | 0.0000 | No |
| 19963 | Gm20889 | 0.0000 | No |
| 19964 | Gm20890 | 0.0000 | No |
| 19965 | Gm20891 | 0.0000 | No |
| 19966 | Gm20892 | 0.0000 | No |
| 19967 | Gm20893 | 0.0000 | No |
| 19968 | Gm20894 | 0.0000 | No |
| 19969 | Gm20895 | 0.0000 | No |
| 19970 | Gm20896 | 0.0000 | No |
| 19971 | Gm20897 | 0.0000 | No |
| 19972 | Gm20898 | 0.0000 | No |
| 19973 | Gm20900 | 0.0000 | No |
| 19974 | Gm20902 | 0.0000 | No |
| 19975 | Gm20903 | 0.0000 | No |
| 19976 | Gm20904 | 0.0000 | No |
| 19977 | Gm20905 | 0.0000 | No |
| 19978 | Gm20906 | 0.0000 | No |
| 19979 | Gm20907 | 0.0000 | No |
| 19980 | Gm20908 | 0.0000 | No |
| 19981 | Gm20909 | 0.0000 | No |
| 19982 | Gm20910 | 0.0000 | No |
| 19983 | Gm20911 | 0.0000 | No |
| 19984 | Gm20912 | 0.0000 | No |
| 19985 | Gm20913 | 0.0000 | No |
| 19986 | Gm20914 | 0.0000 | No |
| 19987 | Gm20915 | 0.0000 | No |
| 19988 | Gm20916 | 0.0000 | No |
| 19989 | Gm20917 | 0.0000 | No |
| 19990 | Gm20918 | 0.0000 | No |
| 19991 | Gm20919 | 0.0000 | No |
| 19992 | Gm2092  | 0.0000 | No |
| 19993 | Gm20920 | 0.0000 | No |
| 19994 | Gm20921 | 0.0000 | No |
| 19995 | Gm20922 | 0.0000 | No |
| 19996 | Gm20923 | 0.0000 | No |
| 19997 | Gm20924 | 0.0000 | No |
| 19998 | Gm20925 | 0.0000 | No |
| 19999 | Gm20926 | 0.0000 | No |
| 20000 | Gm20927 | 0.0000 | No |
| 20001 | Gm20928 | 0.0000 | No |
| 20002 | Gm20929 | 0.0000 | No |
| 20003 | Gm2093  | 0.0000 | No |
| 20004 | Gm20930 | 0.0000 | No |
| 20005 | Gm20931 | 0.0000 | No |
| 20006 | Gm20932 | 0.0000 | No |
| 20007 | Gm20933 | 0.0000 | No |

|       |         |        |    |
|-------|---------|--------|----|
| 20008 | Gm20934 | 0.0000 | No |
| 20009 | Gm20935 | 0.0000 | No |
| 20010 | Gm20936 | 0.0000 | No |
| 20011 | Gm20937 | 0.0000 | No |
| 20012 | Gm20939 | 0.0000 | No |
| 20013 | Gm20945 | 0.0000 | No |
| 20014 | Gm20948 | 0.0000 | No |
| 20015 | Gm20954 | 0.0000 | No |
| 20016 | Gm20963 | 0.0000 | No |
| 20017 | Gm20978 | 0.0000 | No |
| 20018 | Gm2098  | 0.0000 | No |
| 20019 | Gm20987 | 0.0000 | No |
| 20020 | Gm20997 | 0.0000 | No |
| 20021 | Gm21006 | 0.0000 | No |
| 20022 | Gm21009 | 0.0000 | No |
| 20023 | Gm2101  | 0.0000 | No |
| 20024 | Gm21028 | 0.0000 | No |
| 20025 | Gm21032 | 0.0000 | No |
| 20026 | Gm21033 | 0.0000 | No |
| 20027 | Gm21034 | 0.0000 | No |
| 20028 | Gm21035 | 0.0000 | No |
| 20029 | Gm21036 | 0.0000 | No |
| 20030 | Gm21037 | 0.0000 | No |
| 20031 | Gm21040 | 0.0000 | No |
| 20032 | Gm21043 | 0.0000 | No |
| 20033 | Gm21045 | 0.0000 | No |
| 20034 | Gm21049 | 0.0000 | No |
| 20035 | Gm21054 | 0.0000 | No |
| 20036 | Gm21057 | 0.0000 | No |
| 20037 | Gm21060 | 0.0000 | No |
| 20038 | Gm21064 | 0.0000 | No |
| 20039 | Gm21065 | 0.0000 | No |
| 20040 | Gm21070 | 0.0000 | No |
| 20041 | Gm21076 | 0.0000 | No |
| 20042 | Gm2108  | 0.0000 | No |
| 20043 | Gm21083 | 0.0000 | No |
| 20044 | Gm21088 | 0.0000 | No |
| 20045 | Gm2109  | 0.0000 | No |
| 20046 | Gm21092 | 0.0000 | No |
| 20047 | Gm21093 | 0.0000 | No |
| 20048 | Gm21094 | 0.0000 | No |
| 20049 | Gm21095 | 0.0000 | No |
| 20050 | Gm21103 | 0.0000 | No |
| 20051 | Gm21111 | 0.0000 | No |
| 20052 | Gm21114 | 0.0000 | No |
| 20053 | Gm21115 | 0.0000 | No |

|       |         |        |    |
|-------|---------|--------|----|
| 20054 | Gm21117 | 0.0000 | No |
| 20055 | Gm21118 | 0.0000 | No |
| 20056 | Gm21119 | 0.0000 | No |
| 20057 | Gm21123 | 0.0000 | No |
| 20058 | Gm21127 | 0.0000 | No |
| 20059 | Gm21129 | 0.0000 | No |
| 20060 | Gm21135 | 0.0000 | No |
| 20061 | Gm21136 | 0.0000 | No |
| 20062 | Gm21139 | 0.0000 | No |
| 20063 | Gm21142 | 0.0000 | No |
| 20064 | Gm21147 | 0.0000 | No |
| 20065 | Gm21149 | 0.0000 | No |
| 20066 | Gm2115  | 0.0000 | No |
| 20067 | Gm21151 | 0.0000 | No |
| 20068 | Gm21152 | 0.0000 | No |
| 20069 | Gm21155 | 0.0000 | No |
| 20070 | Gm21156 | 0.0000 | No |
| 20071 | Gm21160 | 0.0000 | No |
| 20072 | Gm21163 | 0.0000 | No |
| 20073 | Gm2117  | 0.0000 | No |
| 20074 | Gm21170 | 0.0000 | No |
| 20075 | Gm21171 | 0.0000 | No |
| 20076 | Gm21173 | 0.0000 | No |
| 20077 | Gm21180 | 0.0000 | No |
| 20078 | Gm21181 | 0.0000 | No |
| 20079 | Gm21182 | 0.0000 | No |
| 20080 | Gm21184 | 0.0000 | No |
| 20081 | Gm21188 | 0.0000 | No |
| 20082 | Gm21190 | 0.0000 | No |
| 20083 | Gm21191 | 0.0000 | No |
| 20084 | Gm21198 | 0.0000 | No |
| 20085 | Gm21201 | 0.0000 | No |
| 20086 | Gm21209 | 0.0000 | No |
| 20087 | Gm21221 | 0.0000 | No |
| 20088 | Gm21232 | 0.0000 | No |
| 20089 | Gm21241 | 0.0000 | No |
| 20090 | Gm21242 | 0.0000 | No |
| 20091 | Gm21244 | 0.0000 | No |
| 20092 | Gm21245 | 0.0000 | No |
| 20093 | Gm21247 | 0.0000 | No |
| 20094 | Gm21248 | 0.0000 | No |
| 20095 | Gm21249 | 0.0000 | No |
| 20096 | Gm21256 | 0.0000 | No |
| 20097 | Gm21257 | 0.0000 | No |
| 20098 | Gm21258 | 0.0000 | No |
| 20099 | Gm21268 | 0.0000 | No |

|       |         |        |    |
|-------|---------|--------|----|
| 20100 | Gm21269 | 0.0000 | No |
| 20101 | Gm21271 | 0.0000 | No |
| 20102 | Gm21275 | 0.0000 | No |
| 20103 | Gm21276 | 0.0000 | No |
| 20104 | Gm2128  | 0.0000 | No |
| 20105 | Gm21281 | 0.0000 | No |
| 20106 | Gm21282 | 0.0000 | No |
| 20107 | Gm21284 | 0.0000 | No |
| 20108 | Gm21285 | 0.0000 | No |
| 20109 | Gm21286 | 0.0000 | No |
| 20110 | Gm21287 | 0.0000 | No |
| 20111 | Gm21292 | 0.0000 | No |
| 20112 | Gm21293 | 0.0000 | No |
| 20113 | Gm21294 | 0.0000 | No |
| 20114 | Gm21301 | 0.0000 | No |
| 20115 | Gm21302 | 0.0000 | No |
| 20116 | Gm21304 | 0.0000 | No |
| 20117 | Gm21308 | 0.0000 | No |
| 20118 | Gm21310 | 0.0000 | No |
| 20119 | Gm21312 | 0.0000 | No |
| 20120 | Gm21316 | 0.0000 | No |
| 20121 | Gm21317 | 0.0000 | No |
| 20122 | Gm21319 | 0.0000 | No |
| 20123 | Gm21330 | 0.0000 | No |
| 20124 | Gm21333 | 0.0000 | No |
| 20125 | Gm21340 | 0.0000 | No |
| 20126 | Gm21344 | 0.0000 | No |
| 20127 | Gm21350 | 0.0000 | No |
| 20128 | Gm21358 | 0.0000 | No |
| 20129 | Gm2136  | 0.0000 | No |
| 20130 | Gm21362 | 0.0000 | No |
| 20131 | Gm21364 | 0.0000 | No |
| 20132 | Gm21366 | 0.0000 | No |
| 20133 | Gm21370 | 0.0000 | No |
| 20134 | Gm21378 | 0.0000 | No |
| 20135 | Gm21379 | 0.0000 | No |
| 20136 | Gm21380 | 0.0000 | No |
| 20137 | Gm21387 | 0.0000 | No |
| 20138 | Gm21392 | 0.0000 | No |
| 20139 | Gm21394 | 0.0000 | No |
| 20140 | Gm21396 | 0.0000 | No |
| 20141 | Gm21399 | 0.0000 | No |
| 20142 | Gm21405 | 0.0000 | No |
| 20143 | Gm21409 | 0.0000 | No |
| 20144 | Gm21411 | 0.0000 | No |
| 20145 | Gm21412 | 0.0000 | No |

|       |         |        |    |
|-------|---------|--------|----|
| 20146 | Gm21413 | 0.0000 | No |
| 20147 | Gm21419 | 0.0000 | No |
| 20148 | Gm2142  | 0.0000 | No |
| 20149 | Gm21425 | 0.0000 | No |
| 20150 | Gm21427 | 0.0000 | No |
| 20151 | Gm21428 | 0.0000 | No |
| 20152 | Gm21430 | 0.0000 | No |
| 20153 | Gm21435 | 0.0000 | No |
| 20154 | Gm21440 | 0.0000 | No |
| 20155 | Gm21443 | 0.0000 | No |
| 20156 | Gm21447 | 0.0000 | No |
| 20157 | Gm21450 | 0.0000 | No |
| 20158 | Gm21451 | 0.0000 | No |
| 20159 | Gm21454 | 0.0000 | No |
| 20160 | Gm21461 | 0.0000 | No |
| 20161 | Gm21462 | 0.0000 | No |
| 20162 | Gm21469 | 0.0000 | No |
| 20163 | Gm2147  | 0.0000 | No |
| 20164 | Gm21470 | 0.0000 | No |
| 20165 | Gm21476 | 0.0000 | No |
| 20166 | Gm21488 | 0.0000 | No |
| 20167 | Gm21489 | 0.0000 | No |
| 20168 | Gm21497 | 0.0000 | No |
| 20169 | Gm21506 | 0.0000 | No |
| 20170 | Gm21518 | 0.0000 | No |
| 20171 | Gm21524 | 0.0000 | No |
| 20172 | Gm21529 | 0.0000 | No |
| 20173 | Gm21530 | 0.0000 | No |
| 20174 | Gm21539 | 0.0000 | No |
| 20175 | Gm21541 | 0.0000 | No |
| 20176 | Gm21542 | 0.0000 | No |
| 20177 | Gm2155  | 0.0000 | No |
| 20178 | Gm21560 | 0.0000 | No |
| 20179 | Gm21562 | 0.0000 | No |
| 20180 | Gm21572 | 0.0000 | No |
| 20181 | Gm21573 | 0.0000 | No |
| 20182 | Gm21577 | 0.0000 | No |
| 20183 | Gm21586 | 0.0000 | No |
| 20184 | Gm21588 | 0.0000 | No |
| 20185 | Gm21596 | 0.0000 | No |
| 20186 | Gm21599 | 0.0000 | No |
| 20187 | Gm21608 | 0.0000 | No |
| 20188 | Gm21616 | 0.0000 | No |
| 20189 | Gm21617 | 0.0000 | No |
| 20190 | Gm21626 | 0.0000 | No |
| 20191 | Gm21627 | 0.0000 | No |

|       |         |        |    |
|-------|---------|--------|----|
| 20192 | Gm2163  | 0.0000 | No |
| 20193 | Gm21631 | 0.0000 | No |
| 20194 | Gm21633 | 0.0000 | No |
| 20195 | Gm21634 | 0.0000 | No |
| 20196 | Gm21637 | 0.0000 | No |
| 20197 | Gm21638 | 0.0000 | No |
| 20198 | Gm21642 | 0.0000 | No |
| 20199 | Gm21645 | 0.0000 | No |
| 20200 | Gm21647 | 0.0000 | No |
| 20201 | Gm2165  | 0.0000 | No |
| 20202 | Gm21650 | 0.0000 | No |
| 20203 | Gm21654 | 0.0000 | No |
| 20204 | Gm21655 | 0.0000 | No |
| 20205 | Gm21657 | 0.0000 | No |
| 20206 | Gm21658 | 0.0000 | No |
| 20207 | Gm21660 | 0.0000 | No |
| 20208 | Gm21661 | 0.0000 | No |
| 20209 | Gm21663 | 0.0000 | No |
| 20210 | Gm21671 | 0.0000 | No |
| 20211 | Gm21672 | 0.0000 | No |
| 20212 | Gm21673 | 0.0000 | No |
| 20213 | Gm21677 | 0.0000 | No |
| 20214 | Gm21678 | 0.0000 | No |
| 20215 | Gm21679 | 0.0000 | No |
| 20216 | Gm21680 | 0.0000 | No |
| 20217 | Gm21681 | 0.0000 | No |
| 20218 | Gm21683 | 0.0000 | No |
| 20219 | Gm21685 | 0.0000 | No |
| 20220 | Gm21693 | 0.0000 | No |
| 20221 | Gm21699 | 0.0000 | No |
| 20222 | Gm21704 | 0.0000 | No |
| 20223 | Gm21708 | 0.0000 | No |
| 20224 | Gm21715 | 0.0000 | No |
| 20225 | Gm21717 | 0.0000 | No |
| 20226 | Gm21718 | 0.0000 | No |
| 20227 | Gm21719 | 0.0000 | No |
| 20228 | Gm21720 | 0.0000 | No |
| 20229 | Gm21721 | 0.0000 | No |
| 20230 | Gm21722 | 0.0000 | No |
| 20231 | Gm21723 | 0.0000 | No |
| 20232 | Gm21724 | 0.0000 | No |
| 20233 | Gm21725 | 0.0000 | No |
| 20234 | Gm21726 | 0.0000 | No |
| 20235 | Gm21728 | 0.0000 | No |
| 20236 | Gm21729 | 0.0000 | No |
| 20237 | Gm21732 | 0.0000 | No |



|       |         |        |    |
|-------|---------|--------|----|
| 20238 | Gm21733 | 0.0000 | No |
| 20239 | Gm21734 | 0.0000 | No |
| 20240 | Gm21735 | 0.0000 | No |
| 20241 | Gm21736 | 0.0000 | No |
| 20242 | Gm21737 | 0.0000 | No |
| 20243 | Gm21738 | 0.0000 | No |
| 20244 | Gm21739 | 0.0000 | No |
| 20245 | Gm2174  | 0.0000 | No |
| 20246 | Gm21740 | 0.0000 | No |
| 20247 | Gm21741 | 0.0000 | No |
| 20248 | Gm21742 | 0.0000 | No |
| 20249 | Gm21744 | 0.0000 | No |
| 20250 | Gm21745 | 0.0000 | No |
| 20251 | Gm21746 | 0.0000 | No |
| 20252 | Gm21748 | 0.0000 | No |
| 20253 | Gm21749 | 0.0000 | No |
| 20254 | Gm21750 | 0.0000 | No |
| 20255 | Gm21751 | 0.0000 | No |
| 20256 | Gm21752 | 0.0000 | No |
| 20257 | Gm21753 | 0.0000 | No |
| 20258 | Gm21754 | 0.0000 | No |
| 20259 | Gm21755 | 0.0000 | No |
| 20260 | Gm21756 | 0.0000 | No |
| 20261 | Gm21757 | 0.0000 | No |
| 20262 | Gm21758 | 0.0000 | No |
| 20263 | Gm21760 | 0.0000 | No |
| 20264 | Gm21761 | 0.0000 | No |
| 20265 | Gm21763 | 0.0000 | No |
| 20266 | Gm21764 | 0.0000 | No |
| 20267 | Gm21765 | 0.0000 | No |
| 20268 | Gm21766 | 0.0000 | No |
| 20269 | Gm21767 | 0.0000 | No |
| 20270 | Gm21768 | 0.0000 | No |
| 20271 | Gm21771 | 0.0000 | No |
| 20272 | Gm21772 | 0.0000 | No |
| 20273 | Gm21773 | 0.0000 | No |
| 20274 | Gm21774 | 0.0000 | No |
| 20275 | Gm21775 | 0.0000 | No |
| 20276 | Gm21776 | 0.0000 | No |
| 20277 | Gm21777 | 0.0000 | No |
| 20278 | Gm21778 | 0.0000 | No |
| 20279 | Gm21779 | 0.0000 | No |
| 20280 | Gm2178  | 0.0000 | No |
| 20281 | Gm21780 | 0.0000 | No |
| 20282 | Gm21781 | 0.0000 | No |
| 20283 | Gm21782 | 0.0000 | No |

|       |         |        |    |
|-------|---------|--------|----|
| 20284 | Gm21783 | 0.0000 | No |
| 20285 | Gm21784 | 0.0000 | No |
| 20286 | Gm21785 | 0.0000 | No |
| 20287 | Gm21787 | 0.0000 | No |
| 20288 | Gm21788 | 0.0000 | No |
| 20289 | Gm21789 | 0.0000 | No |
| 20290 | Gm21790 | 0.0000 | No |
| 20291 | Gm21791 | 0.0000 | No |
| 20292 | Gm21792 | 0.0000 | No |
| 20293 | Gm21794 | 0.0000 | No |
| 20294 | Gm21795 | 0.0000 | No |
| 20295 | Gm21796 | 0.0000 | No |
| 20296 | Gm21797 | 0.0000 | No |
| 20297 | Gm21799 | 0.0000 | No |
| 20298 | Gm21800 | 0.0000 | No |
| 20299 | Gm21801 | 0.0000 | No |
| 20300 | Gm21802 | 0.0000 | No |
| 20301 | Gm21803 | 0.0000 | No |
| 20302 | Gm21804 | 0.0000 | No |
| 20303 | Gm21805 | 0.0000 | No |
| 20304 | Gm21806 | 0.0000 | No |
| 20305 | Gm21808 | 0.0000 | No |
| 20306 | Gm21809 | 0.0000 | No |
| 20307 | Gm21810 | 0.0000 | No |
| 20308 | Gm21811 | 0.0000 | No |
| 20309 | Gm21812 | 0.0000 | No |
| 20310 | Gm21813 | 0.0000 | No |
| 20311 | Gm21814 | 0.0000 | No |
| 20312 | Gm21815 | 0.0000 | No |
| 20313 | Gm21816 | 0.0000 | No |
| 20314 | Gm21817 | 0.0000 | No |
| 20315 | Gm21818 | 0.0000 | No |
| 20316 | Gm21819 | 0.0000 | No |
| 20317 | Gm2182  | 0.0000 | No |
| 20318 | Gm21820 | 0.0000 | No |
| 20319 | Gm21821 | 0.0000 | No |
| 20320 | Gm21822 | 0.0000 | No |
| 20321 | Gm21823 | 0.0000 | No |
| 20322 | Gm21824 | 0.0000 | No |
| 20323 | Gm21825 | 0.0000 | No |
| 20324 | Gm21826 | 0.0000 | No |
| 20325 | Gm21827 | 0.0000 | No |
| 20326 | Gm21828 | 0.0000 | No |
| 20327 | Gm21829 | 0.0000 | No |
| 20328 | Gm21830 | 0.0000 | No |
| 20329 | Gm21832 | 0.0000 | No |

|       |         |        |    |
|-------|---------|--------|----|
| 20330 | Gm21833 | 0.0000 | No |
| 20331 | Gm21834 | 0.0000 | No |
| 20332 | Gm21835 | 0.0000 | No |
| 20333 | Gm21836 | 0.0000 | No |
| 20334 | Gm21837 | 0.0000 | No |
| 20335 | Gm21838 | 0.0000 | No |
| 20336 | Gm21839 | 0.0000 | No |
| 20337 | Gm21840 | 0.0000 | No |
| 20338 | Gm21841 | 0.0000 | No |
| 20339 | Gm21842 | 0.0000 | No |
| 20340 | Gm21843 | 0.0000 | No |
| 20341 | Gm21844 | 0.0000 | No |
| 20342 | Gm21845 | 0.0000 | No |
| 20343 | Gm21846 | 0.0000 | No |
| 20344 | Gm21847 | 0.0000 | No |
| 20345 | Gm21848 | 0.0000 | No |
| 20346 | Gm21849 | 0.0000 | No |
| 20347 | Gm21850 | 0.0000 | No |
| 20348 | Gm21851 | 0.0000 | No |
| 20349 | Gm21852 | 0.0000 | No |
| 20350 | Gm21853 | 0.0000 | No |
| 20351 | Gm21854 | 0.0000 | No |
| 20352 | Gm21855 | 0.0000 | No |
| 20353 | Gm21856 | 0.0000 | No |
| 20354 | Gm21857 | 0.0000 | No |
| 20355 | Gm21858 | 0.0000 | No |
| 20356 | Gm21859 | 0.0000 | No |
| 20357 | Gm21860 | 0.0000 | No |
| 20358 | Gm21861 | 0.0000 | No |
| 20359 | Gm21862 | 0.0000 | No |
| 20360 | Gm21863 | 0.0000 | No |
| 20361 | Gm21864 | 0.0000 | No |
| 20362 | Gm21865 | 0.0000 | No |
| 20363 | Gm21866 | 0.0000 | No |
| 20364 | Gm21867 | 0.0000 | No |
| 20365 | Gm21868 | 0.0000 | No |
| 20366 | Gm21869 | 0.0000 | No |
| 20367 | Gm21870 | 0.0000 | No |
| 20368 | Gm21871 | 0.0000 | No |
| 20369 | Gm21872 | 0.0000 | No |
| 20370 | Gm21873 | 0.0000 | No |
| 20371 | Gm21874 | 0.0000 | No |
| 20372 | Gm21875 | 0.0000 | No |
| 20373 | Gm21876 | 0.0000 | No |
| 20374 | Gm21877 | 0.0000 | No |
| 20375 | Gm21878 | 0.0000 | No |

|       |         |        |    |
|-------|---------|--------|----|
| 20376 | Gm21879 | 0.0000 | No |
| 20377 | Gm21880 | 0.0000 | No |
| 20378 | Gm21881 | 0.0000 | No |
| 20379 | Gm21882 | 0.0000 | No |
| 20380 | Gm21883 | 0.0000 | No |
| 20381 | Gm21885 | 0.0000 | No |
| 20382 | Gm21886 | 0.0000 | No |
| 20383 | Gm21887 | 0.0000 | No |
| 20384 | Gm21889 | 0.0000 | No |
| 20385 | Gm2189  | 0.0000 | No |
| 20386 | Gm21890 | 0.0000 | No |
| 20387 | Gm21891 | 0.0000 | No |
| 20388 | Gm21892 | 0.0000 | No |
| 20389 | Gm21894 | 0.0000 | No |
| 20390 | Gm21895 | 0.0000 | No |
| 20391 | Gm21896 | 0.0000 | No |
| 20392 | Gm21897 | 0.0000 | No |
| 20393 | Gm21898 | 0.0000 | No |
| 20394 | Gm21899 | 0.0000 | No |
| 20395 | Gm21900 | 0.0000 | No |
| 20396 | Gm21901 | 0.0000 | No |
| 20397 | Gm21902 | 0.0000 | No |
| 20398 | Gm21903 | 0.0000 | No |
| 20399 | Gm21904 | 0.0000 | No |
| 20400 | Gm21906 | 0.0000 | No |
| 20401 | Gm21907 | 0.0000 | No |
| 20402 | Gm21908 | 0.0000 | No |
| 20403 | Gm21909 | 0.0000 | No |
| 20404 | Gm21910 | 0.0000 | No |
| 20405 | Gm21912 | 0.0000 | No |
| 20406 | Gm21913 | 0.0000 | No |
| 20407 | Gm21914 | 0.0000 | No |
| 20408 | Gm21915 | 0.0000 | No |
| 20409 | Gm21916 | 0.0000 | No |
| 20410 | Gm21917 | 0.0000 | No |
| 20411 | Gm21918 | 0.0000 | No |
| 20412 | Gm21919 | 0.0000 | No |
| 20413 | Gm21920 | 0.0000 | No |
| 20414 | Gm21921 | 0.0000 | No |
| 20415 | Gm21922 | 0.0000 | No |
| 20416 | Gm21923 | 0.0000 | No |
| 20417 | Gm21924 | 0.0000 | No |
| 20418 | Gm21936 | 0.0000 | No |
| 20419 | Gm21940 | 0.0000 | No |
| 20420 | Gm21943 | 0.0000 | No |
| 20421 | Gm21949 | 0.0000 | No |

|       |         |        |    |
|-------|---------|--------|----|
| 20422 | Gm21950 | 0.0000 | No |
| 20423 | Gm21951 | 0.0000 | No |
| 20424 | Gm21953 | 0.0000 | No |
| 20425 | Gm21954 | 0.0000 | No |
| 20426 | Gm21955 | 0.0000 | No |
| 20427 | Gm21956 | 0.0000 | No |
| 20428 | Gm21957 | 0.0000 | No |
| 20429 | Gm21958 | 0.0000 | No |
| 20430 | Gm21959 | 0.0000 | No |
| 20431 | Gm21960 | 0.0000 | No |
| 20432 | Gm21961 | 0.0000 | No |
| 20433 | Gm21962 | 0.0000 | No |
| 20434 | Gm21963 | 0.0000 | No |
| 20435 | Gm21964 | 0.0000 | No |
| 20436 | Gm21965 | 0.0000 | No |
| 20437 | Gm21967 | 0.0000 | No |
| 20438 | Gm21969 | 0.0000 | No |
| 20439 | Gm21970 | 0.0000 | No |
| 20440 | Gm21971 | 0.0000 | No |
| 20441 | Gm21972 | 0.0000 | No |
| 20442 | Gm21973 | 0.0000 | No |
| 20443 | Gm21974 | 0.0000 | No |
| 20444 | Gm21975 | 0.0000 | No |
| 20445 | Gm21976 | 0.0000 | No |
| 20446 | Gm21977 | 0.0000 | No |
| 20447 | Gm21979 | 0.0000 | No |
| 20448 | Gm21980 | 0.0000 | No |
| 20449 | Gm21981 | 0.0000 | No |
| 20450 | Gm21982 | 0.0000 | No |
| 20451 | Gm21983 | 0.0000 | No |
| 20452 | Gm21984 | 0.0000 | No |
| 20453 | Gm21985 | 0.0000 | No |
| 20454 | Gm21986 | 0.0000 | No |
| 20455 | Gm21987 | 0.0000 | No |
| 20456 | Gm21988 | 0.0000 | No |
| 20457 | Gm21989 | 0.0000 | No |
| 20458 | Gm2199  | 0.0000 | No |
| 20459 | Gm21990 | 0.0000 | No |
| 20460 | Gm21991 | 0.0000 | No |
| 20461 | Gm21992 | 0.0000 | No |
| 20462 | Gm21994 | 0.0000 | No |
| 20463 | Gm21996 | 0.0000 | No |
| 20464 | Gm21998 | 0.0000 | No |
| 20465 | Gm21999 | 0.0000 | No |
| 20466 | Gm2200  | 0.0000 | No |
| 20467 | Gm22000 | 0.0000 | No |

|       |         |        |    |
|-------|---------|--------|----|
| 20468 | Gm22002 | 0.0000 | No |
| 20469 | Gm22003 | 0.0000 | No |
| 20470 | Gm22004 | 0.0000 | No |
| 20471 | Gm22006 | 0.0000 | No |
| 20472 | Gm22008 | 0.0000 | No |
| 20473 | Gm22009 | 0.0000 | No |
| 20474 | Gm22010 | 0.0000 | No |
| 20475 | Gm22013 | 0.0000 | No |
| 20476 | Gm22014 | 0.0000 | No |
| 20477 | Gm22015 | 0.0000 | No |
| 20478 | Gm22016 | 0.0000 | No |
| 20479 | Gm22019 | 0.0000 | No |
| 20480 | Gm22020 | 0.0000 | No |
| 20481 | Gm22021 | 0.0000 | No |
| 20482 | Gm22022 | 0.0000 | No |
| 20483 | Gm22023 | 0.0000 | No |
| 20484 | Gm22024 | 0.0000 | No |
| 20485 | Gm22025 | 0.0000 | No |
| 20486 | Gm22026 | 0.0000 | No |
| 20487 | Gm22027 | 0.0000 | No |
| 20488 | Gm22030 | 0.0000 | No |
| 20489 | Gm22031 | 0.0000 | No |
| 20490 | Gm22032 | 0.0000 | No |
| 20491 | Gm22033 | 0.0000 | No |
| 20492 | Gm22034 | 0.0000 | No |
| 20493 | Gm22035 | 0.0000 | No |
| 20494 | Gm22036 | 0.0000 | No |
| 20495 | Gm22038 | 0.0000 | No |
| 20496 | Gm22039 | 0.0000 | No |
| 20497 | Gm22042 | 0.0000 | No |
| 20498 | Gm22043 | 0.0000 | No |
| 20499 | Gm22044 | 0.0000 | No |
| 20500 | Gm22045 | 0.0000 | No |
| 20501 | Gm22046 | 0.0000 | No |
| 20502 | Gm22047 | 0.0000 | No |
| 20503 | Gm22048 | 0.0000 | No |
| 20504 | Gm22050 | 0.0000 | No |
| 20505 | Gm22051 | 0.0000 | No |
| 20506 | Gm22053 | 0.0000 | No |
| 20507 | Gm22055 | 0.0000 | No |
| 20508 | Gm22056 | 0.0000 | No |
| 20509 | Gm22057 | 0.0000 | No |
| 20510 | Gm22058 | 0.0000 | No |
| 20511 | Gm22059 | 0.0000 | No |
| 20512 | Gm22060 | 0.0000 | No |
| 20513 | Gm22061 | 0.0000 | No |

|       |         |        |    |
|-------|---------|--------|----|
| 20514 | Gm22062 | 0.0000 | No |
| 20515 | Gm22064 | 0.0000 | No |
| 20516 | Gm22065 | 0.0000 | No |
| 20517 | Gm22066 | 0.0000 | No |
| 20518 | Gm22067 | 0.0000 | No |
| 20519 | Gm22069 | 0.0000 | No |
| 20520 | Gm22070 | 0.0000 | No |
| 20521 | Gm22071 | 0.0000 | No |
| 20522 | Gm22072 | 0.0000 | No |
| 20523 | Gm22073 | 0.0000 | No |
| 20524 | Gm22074 | 0.0000 | No |
| 20525 | Gm22075 | 0.0000 | No |
| 20526 | Gm22077 | 0.0000 | No |
| 20527 | Gm22078 | 0.0000 | No |
| 20528 | Gm22079 | 0.0000 | No |
| 20529 | Gm22080 | 0.0000 | No |
| 20530 | Gm22082 | 0.0000 | No |
| 20531 | Gm22083 | 0.0000 | No |
| 20532 | Gm22084 | 0.0000 | No |
| 20533 | Gm22085 | 0.0000 | No |
| 20534 | Gm22087 | 0.0000 | No |
| 20535 | Gm22089 | 0.0000 | No |
| 20536 | Gm22090 | 0.0000 | No |
| 20537 | Gm22091 | 0.0000 | No |
| 20538 | Gm22092 | 0.0000 | No |
| 20539 | Gm22095 | 0.0000 | No |
| 20540 | Gm22097 | 0.0000 | No |
| 20541 | Gm22098 | 0.0000 | No |
| 20542 | Gm22099 | 0.0000 | No |
| 20543 | Gm22100 | 0.0000 | No |
| 20544 | Gm22101 | 0.0000 | No |
| 20545 | Gm22102 | 0.0000 | No |
| 20546 | Gm22103 | 0.0000 | No |
| 20547 | Gm22105 | 0.0000 | No |
| 20548 | Gm22106 | 0.0000 | No |
| 20549 | Gm22107 | 0.0000 | No |
| 20550 | Gm22108 | 0.0000 | No |
| 20551 | Gm22111 | 0.0000 | No |
| 20552 | Gm22112 | 0.0000 | No |
| 20553 | Gm22113 | 0.0000 | No |
| 20554 | Gm22114 | 0.0000 | No |
| 20555 | Gm22115 | 0.0000 | No |
| 20556 | Gm22116 | 0.0000 | No |
| 20557 | Gm22117 | 0.0000 | No |
| 20558 | Gm22118 | 0.0000 | No |
| 20559 | Gm22119 | 0.0000 | No |

|       |         |        |    |
|-------|---------|--------|----|
| 20560 | Gm22120 | 0.0000 | No |
| 20561 | Gm22121 | 0.0000 | No |
| 20562 | Gm22122 | 0.0000 | No |
| 20563 | Gm22123 | 0.0000 | No |
| 20564 | Gm22126 | 0.0000 | No |
| 20565 | Gm22127 | 0.0000 | No |
| 20566 | Gm22128 | 0.0000 | No |
| 20567 | Gm22129 | 0.0000 | No |
| 20568 | Gm2213  | 0.0000 | No |
| 20569 | Gm22130 | 0.0000 | No |
| 20570 | Gm22131 | 0.0000 | No |
| 20571 | Gm22132 | 0.0000 | No |
| 20572 | Gm22133 | 0.0000 | No |
| 20573 | Gm22136 | 0.0000 | No |
| 20574 | Gm22137 | 0.0000 | No |
| 20575 | Gm22138 | 0.0000 | No |
| 20576 | Gm22139 | 0.0000 | No |
| 20577 | Gm2214  | 0.0000 | No |
| 20578 | Gm22140 | 0.0000 | No |
| 20579 | Gm22141 | 0.0000 | No |
| 20580 | Gm22143 | 0.0000 | No |
| 20581 | Gm22144 | 0.0000 | No |
| 20582 | Gm22145 | 0.0000 | No |
| 20583 | Gm22146 | 0.0000 | No |
| 20584 | Gm22148 | 0.0000 | No |
| 20585 | Gm22149 | 0.0000 | No |
| 20586 | Gm22150 | 0.0000 | No |
| 20587 | Gm22151 | 0.0000 | No |
| 20588 | Gm22154 | 0.0000 | No |
| 20589 | Gm22155 | 0.0000 | No |
| 20590 | Gm22156 | 0.0000 | No |
| 20591 | Gm22157 | 0.0000 | No |
| 20592 | Gm22158 | 0.0000 | No |
| 20593 | Gm22159 | 0.0000 | No |
| 20594 | Gm22160 | 0.0000 | No |
| 20595 | Gm22163 | 0.0000 | No |
| 20596 | Gm22165 | 0.0000 | No |
| 20597 | Gm22166 | 0.0000 | No |
| 20598 | Gm22169 | 0.0000 | No |
| 20599 | Gm22170 | 0.0000 | No |
| 20600 | Gm22171 | 0.0000 | No |
| 20601 | Gm22174 | 0.0000 | No |
| 20602 | Gm22175 | 0.0000 | No |
| 20603 | Gm22177 | 0.0000 | No |
| 20604 | Gm22180 | 0.0000 | No |
| 20605 | Gm22183 | 0.0000 | No |



|       |         |        |    |
|-------|---------|--------|----|
| 20606 | Gm22184 | 0.0000 | No |
| 20607 | Gm22186 | 0.0000 | No |
| 20608 | Gm22187 | 0.0000 | No |
| 20609 | Gm22189 | 0.0000 | No |
| 20610 | Gm22190 | 0.0000 | No |
| 20611 | Gm22191 | 0.0000 | No |
| 20612 | Gm22192 | 0.0000 | No |
| 20613 | Gm22193 | 0.0000 | No |
| 20614 | Gm22194 | 0.0000 | No |
| 20615 | Gm22195 | 0.0000 | No |
| 20616 | Gm22196 | 0.0000 | No |
| 20617 | Gm22198 | 0.0000 | No |
| 20618 | Gm22199 | 0.0000 | No |
| 20619 | Gm22200 | 0.0000 | No |
| 20620 | Gm22201 | 0.0000 | No |
| 20621 | Gm22203 | 0.0000 | No |
| 20622 | Gm22204 | 0.0000 | No |
| 20623 | Gm22205 | 0.0000 | No |
| 20624 | Gm22206 | 0.0000 | No |
| 20625 | Gm22207 | 0.0000 | No |
| 20626 | Gm2221  | 0.0000 | No |
| 20627 | Gm22210 | 0.0000 | No |
| 20628 | Gm22211 | 0.0000 | No |
| 20629 | Gm22212 | 0.0000 | No |
| 20630 | Gm22213 | 0.0000 | No |
| 20631 | Gm22214 | 0.0000 | No |
| 20632 | Gm22217 | 0.0000 | No |
| 20633 | Gm22218 | 0.0000 | No |
| 20634 | Gm22219 | 0.0000 | No |
| 20635 | Gm22220 | 0.0000 | No |
| 20636 | Gm22221 | 0.0000 | No |
| 20637 | Gm22223 | 0.0000 | No |
| 20638 | Gm22225 | 0.0000 | No |
| 20639 | Gm22226 | 0.0000 | No |
| 20640 | Gm22227 | 0.0000 | No |
| 20641 | Gm22229 | 0.0000 | No |
| 20642 | Gm2223  | 0.0000 | No |
| 20643 | Gm22231 | 0.0000 | No |
| 20644 | Gm22232 | 0.0000 | No |
| 20645 | Gm22233 | 0.0000 | No |
| 20646 | Gm22234 | 0.0000 | No |
| 20647 | Gm22235 | 0.0000 | No |
| 20648 | Gm22236 | 0.0000 | No |
| 20649 | Gm22238 | 0.0000 | No |
| 20650 | Gm22239 | 0.0000 | No |
| 20651 | Gm22240 | 0.0000 | No |

|       |         |        |    |
|-------|---------|--------|----|
| 20652 | Gm22242 | 0.0000 | No |
| 20653 | Gm22243 | 0.0000 | No |
| 20654 | Gm22245 | 0.0000 | No |
| 20655 | Gm22246 | 0.0000 | No |
| 20656 | Gm22247 | 0.0000 | No |
| 20657 | Gm22248 | 0.0000 | No |
| 20658 | Gm22249 | 0.0000 | No |
| 20659 | Gm2225  | 0.0000 | No |
| 20660 | Gm22251 | 0.0000 | No |
| 20661 | Gm22252 | 0.0000 | No |
| 20662 | Gm22253 | 0.0000 | No |
| 20663 | Gm22254 | 0.0000 | No |
| 20664 | Gm22255 | 0.0000 | No |
| 20665 | Gm22257 | 0.0000 | No |
| 20666 | Gm22258 | 0.0000 | No |
| 20667 | Gm22259 | 0.0000 | No |
| 20668 | Gm22260 | 0.0000 | No |
| 20669 | Gm22261 | 0.0000 | No |
| 20670 | Gm22262 | 0.0000 | No |
| 20671 | Gm22263 | 0.0000 | No |
| 20672 | Gm22264 | 0.0000 | No |
| 20673 | Gm22266 | 0.0000 | No |
| 20674 | Gm22267 | 0.0000 | No |
| 20675 | Gm22268 | 0.0000 | No |
| 20676 | Gm22269 | 0.0000 | No |
| 20677 | Gm22270 | 0.0000 | No |
| 20678 | Gm22271 | 0.0000 | No |
| 20679 | Gm22272 | 0.0000 | No |
| 20680 | Gm22273 | 0.0000 | No |
| 20681 | Gm22274 | 0.0000 | No |
| 20682 | Gm22275 | 0.0000 | No |
| 20683 | Gm22276 | 0.0000 | No |
| 20684 | Gm22277 | 0.0000 | No |
| 20685 | Gm22279 | 0.0000 | No |
| 20686 | Gm22281 | 0.0000 | No |
| 20687 | Gm22282 | 0.0000 | No |
| 20688 | Gm22283 | 0.0000 | No |
| 20689 | Gm22284 | 0.0000 | No |
| 20690 | Gm22285 | 0.0000 | No |
| 20691 | Gm22286 | 0.0000 | No |
| 20692 | Gm22287 | 0.0000 | No |
| 20693 | Gm22288 | 0.0000 | No |
| 20694 | Gm2229  | 0.0000 | No |
| 20695 | Gm22290 | 0.0000 | No |
| 20696 | Gm22293 | 0.0000 | No |
| 20697 | Gm22294 | 0.0000 | No |

|       |         |        |    |
|-------|---------|--------|----|
| 20698 | Gm22296 | 0.0000 | No |
| 20699 | Gm22297 | 0.0000 | No |
| 20700 | Gm22298 | 0.0000 | No |
| 20701 | Gm22299 | 0.0000 | No |
| 20702 | Gm22300 | 0.0000 | No |
| 20703 | Gm22301 | 0.0000 | No |
| 20704 | Gm22302 | 0.0000 | No |
| 20705 | Gm22303 | 0.0000 | No |
| 20706 | Gm22304 | 0.0000 | No |
| 20707 | Gm22305 | 0.0000 | No |
| 20708 | Gm22306 | 0.0000 | No |
| 20709 | Gm22307 | 0.0000 | No |
| 20710 | Gm22308 | 0.0000 | No |
| 20711 | Gm2231  | 0.0000 | No |
| 20712 | Gm22310 | 0.0000 | No |
| 20713 | Gm22312 | 0.0000 | No |
| 20714 | Gm22313 | 0.0000 | No |
| 20715 | Gm22314 | 0.0000 | No |
| 20716 | Gm22315 | 0.0000 | No |
| 20717 | Gm22316 | 0.0000 | No |
| 20718 | Gm22317 | 0.0000 | No |
| 20719 | Gm22319 | 0.0000 | No |
| 20720 | Gm22320 | 0.0000 | No |
| 20721 | Gm22321 | 0.0000 | No |
| 20722 | Gm22322 | 0.0000 | No |
| 20723 | Gm22323 | 0.0000 | No |
| 20724 | Gm22324 | 0.0000 | No |
| 20725 | Gm22326 | 0.0000 | No |
| 20726 | Gm22327 | 0.0000 | No |
| 20727 | Gm22328 | 0.0000 | No |
| 20728 | Gm22330 | 0.0000 | No |
| 20729 | Gm22331 | 0.0000 | No |
| 20730 | Gm22332 | 0.0000 | No |
| 20731 | Gm22333 | 0.0000 | No |
| 20732 | Gm22334 | 0.0000 | No |
| 20733 | Gm22335 | 0.0000 | No |
| 20734 | Gm22336 | 0.0000 | No |
| 20735 | Gm22337 | 0.0000 | No |
| 20736 | Gm22338 | 0.0000 | No |
| 20737 | Gm22339 | 0.0000 | No |
| 20738 | Gm22341 | 0.0000 | No |
| 20739 | Gm22342 | 0.0000 | No |
| 20740 | Gm22343 | 0.0000 | No |
| 20741 | Gm22344 | 0.0000 | No |
| 20742 | Gm22345 | 0.0000 | No |
| 20743 | Gm22346 | 0.0000 | No |

|       |         |        |    |
|-------|---------|--------|----|
| 20744 | Gm22347 | 0.0000 | No |
| 20745 | Gm22348 | 0.0000 | No |
| 20746 | Gm22349 | 0.0000 | No |
| 20747 | Gm22350 | 0.0000 | No |
| 20748 | Gm22351 | 0.0000 | No |
| 20749 | Gm22352 | 0.0000 | No |
| 20750 | Gm22353 | 0.0000 | No |
| 20751 | Gm22354 | 0.0000 | No |
| 20752 | Gm22357 | 0.0000 | No |
| 20753 | Gm22358 | 0.0000 | No |
| 20754 | Gm22359 | 0.0000 | No |
| 20755 | Gm22360 | 0.0000 | No |
| 20756 | Gm22361 | 0.0000 | No |
| 20757 | Gm22363 | 0.0000 | No |
| 20758 | Gm22364 | 0.0000 | No |
| 20759 | Gm22365 | 0.0000 | No |
| 20760 | Gm22367 | 0.0000 | No |
| 20761 | Gm22368 | 0.0000 | No |
| 20762 | Gm22369 | 0.0000 | No |
| 20763 | Gm2237  | 0.0000 | No |
| 20764 | Gm22370 | 0.0000 | No |
| 20765 | Gm22371 | 0.0000 | No |
| 20766 | Gm22373 | 0.0000 | No |
| 20767 | Gm22374 | 0.0000 | No |
| 20768 | Gm22378 | 0.0000 | No |
| 20769 | Gm22379 | 0.0000 | No |
| 20770 | Gm2238  | 0.0000 | No |
| 20771 | Gm22380 | 0.0000 | No |
| 20772 | Gm22381 | 0.0000 | No |
| 20773 | Gm22382 | 0.0000 | No |
| 20774 | Gm22384 | 0.0000 | No |
| 20775 | Gm22386 | 0.0000 | No |
| 20776 | Gm22387 | 0.0000 | No |
| 20777 | Gm22388 | 0.0000 | No |
| 20778 | Gm22390 | 0.0000 | No |
| 20779 | Gm22391 | 0.0000 | No |
| 20780 | Gm22392 | 0.0000 | No |
| 20781 | Gm22393 | 0.0000 | No |
| 20782 | Gm22394 | 0.0000 | No |
| 20783 | Gm22395 | 0.0000 | No |
| 20784 | Gm22396 | 0.0000 | No |
| 20785 | Gm22398 | 0.0000 | No |
| 20786 | Gm22401 | 0.0000 | No |
| 20787 | Gm22402 | 0.0000 | No |
| 20788 | Gm22403 | 0.0000 | No |
| 20789 | Gm22406 | 0.0000 | No |

|       |         |        |    |
|-------|---------|--------|----|
| 20790 | Gm22408 | 0.0000 | No |
| 20791 | Gm22411 | 0.0000 | No |
| 20792 | Gm22413 | 0.0000 | No |
| 20793 | Gm22414 | 0.0000 | No |
| 20794 | Gm22416 | 0.0000 | No |
| 20795 | Gm22417 | 0.0000 | No |
| 20796 | Gm22418 | 0.0000 | No |
| 20797 | Gm22419 | 0.0000 | No |
| 20798 | Gm22421 | 0.0000 | No |
| 20799 | Gm22422 | 0.0000 | No |
| 20800 | Gm22423 | 0.0000 | No |
| 20801 | Gm22424 | 0.0000 | No |
| 20802 | Gm22425 | 0.0000 | No |
| 20803 | Gm22426 | 0.0000 | No |
| 20804 | Gm22427 | 0.0000 | No |
| 20805 | Gm22428 | 0.0000 | No |
| 20806 | Gm22429 | 0.0000 | No |
| 20807 | Gm22430 | 0.0000 | No |
| 20808 | Gm22431 | 0.0000 | No |
| 20809 | Gm22433 | 0.0000 | No |
| 20810 | Gm22434 | 0.0000 | No |
| 20811 | Gm22435 | 0.0000 | No |
| 20812 | Gm22438 | 0.0000 | No |
| 20813 | Gm22439 | 0.0000 | No |
| 20814 | Gm2244  | 0.0000 | No |
| 20815 | Gm22442 | 0.0000 | No |
| 20816 | Gm22443 | 0.0000 | No |
| 20817 | Gm22444 | 0.0000 | No |
| 20818 | Gm22446 | 0.0000 | No |
| 20819 | Gm22447 | 0.0000 | No |
| 20820 | Gm22448 | 0.0000 | No |
| 20821 | Gm22449 | 0.0000 | No |
| 20822 | Gm22450 | 0.0000 | No |
| 20823 | Gm22451 | 0.0000 | No |
| 20824 | Gm22452 | 0.0000 | No |
| 20825 | Gm22453 | 0.0000 | No |
| 20826 | Gm22454 | 0.0000 | No |
| 20827 | Gm22455 | 0.0000 | No |
| 20828 | Gm22456 | 0.0000 | No |
| 20829 | Gm22458 | 0.0000 | No |
| 20830 | Gm22460 | 0.0000 | No |
| 20831 | Gm22461 | 0.0000 | No |
| 20832 | Gm22463 | 0.0000 | No |
| 20833 | Gm22464 | 0.0000 | No |
| 20834 | Gm22466 | 0.0000 | No |
| 20835 | Gm22468 | 0.0000 | No |

|       |         |        |    |
|-------|---------|--------|----|
| 20836 | Gm22469 | 0.0000 | No |
| 20837 | Gm22470 | 0.0000 | No |
| 20838 | Gm22471 | 0.0000 | No |
| 20839 | Gm22472 | 0.0000 | No |
| 20840 | Gm22473 | 0.0000 | No |
| 20841 | Gm22474 | 0.0000 | No |
| 20842 | Gm22476 | 0.0000 | No |
| 20843 | Gm22480 | 0.0000 | No |
| 20844 | Gm22481 | 0.0000 | No |
| 20845 | Gm22482 | 0.0000 | No |
| 20846 | Gm22483 | 0.0000 | No |
| 20847 | Gm22484 | 0.0000 | No |
| 20848 | Gm22485 | 0.0000 | No |
| 20849 | Gm22486 | 0.0000 | No |
| 20850 | Gm22488 | 0.0000 | No |
| 20851 | Gm22489 | 0.0000 | No |
| 20852 | Gm22490 | 0.0000 | No |
| 20853 | Gm22493 | 0.0000 | No |
| 20854 | Gm22494 | 0.0000 | No |
| 20855 | Gm22495 | 0.0000 | No |
| 20856 | Gm22496 | 0.0000 | No |
| 20857 | Gm22497 | 0.0000 | No |
| 20858 | Gm22498 | 0.0000 | No |
| 20859 | Gm22499 | 0.0000 | No |
| 20860 | Gm22500 | 0.0000 | No |
| 20861 | Gm22501 | 0.0000 | No |
| 20862 | Gm22502 | 0.0000 | No |
| 20863 | Gm22503 | 0.0000 | No |
| 20864 | Gm22504 | 0.0000 | No |
| 20865 | Gm22505 | 0.0000 | No |
| 20866 | Gm22506 | 0.0000 | No |
| 20867 | Gm22507 | 0.0000 | No |
| 20868 | Gm22508 | 0.0000 | No |
| 20869 | Gm22509 | 0.0000 | No |
| 20870 | Gm22510 | 0.0000 | No |
| 20871 | Gm22511 | 0.0000 | No |
| 20872 | Gm22514 | 0.0000 | No |
| 20873 | Gm22515 | 0.0000 | No |
| 20874 | Gm22516 | 0.0000 | No |
| 20875 | Gm22517 | 0.0000 | No |
| 20876 | Gm22518 | 0.0000 | No |
| 20877 | Gm22519 | 0.0000 | No |
| 20878 | Gm22520 | 0.0000 | No |
| 20879 | Gm22521 | 0.0000 | No |
| 20880 | Gm22522 | 0.0000 | No |
| 20881 | Gm22523 | 0.0000 | No |

|       |         |        |    |
|-------|---------|--------|----|
| 20882 | Gm22524 | 0.0000 | No |
| 20883 | Gm22528 | 0.0000 | No |
| 20884 | Gm22529 | 0.0000 | No |
| 20885 | Gm2253  | 0.0000 | No |
| 20886 | Gm22530 | 0.0000 | No |
| 20887 | Gm22531 | 0.0000 | No |
| 20888 | Gm22532 | 0.0000 | No |
| 20889 | Gm22533 | 0.0000 | No |
| 20890 | Gm22534 | 0.0000 | No |
| 20891 | Gm22536 | 0.0000 | No |
| 20892 | Gm22537 | 0.0000 | No |
| 20893 | Gm22538 | 0.0000 | No |
| 20894 | Gm22539 | 0.0000 | No |
| 20895 | Gm22540 | 0.0000 | No |
| 20896 | Gm22541 | 0.0000 | No |
| 20897 | Gm22542 | 0.0000 | No |
| 20898 | Gm22543 | 0.0000 | No |
| 20899 | Gm22544 | 0.0000 | No |
| 20900 | Gm22545 | 0.0000 | No |
| 20901 | Gm22546 | 0.0000 | No |
| 20902 | Gm22547 | 0.0000 | No |
| 20903 | Gm22548 | 0.0000 | No |
| 20904 | Gm22549 | 0.0000 | No |
| 20905 | Gm22550 | 0.0000 | No |
| 20906 | Gm22551 | 0.0000 | No |
| 20907 | Gm22552 | 0.0000 | No |
| 20908 | Gm22553 | 0.0000 | No |
| 20909 | Gm22554 | 0.0000 | No |
| 20910 | Gm22557 | 0.0000 | No |
| 20911 | Gm22558 | 0.0000 | No |
| 20912 | Gm22559 | 0.0000 | No |
| 20913 | Gm22561 | 0.0000 | No |
| 20914 | Gm22563 | 0.0000 | No |
| 20915 | Gm22565 | 0.0000 | No |
| 20916 | Gm22566 | 0.0000 | No |
| 20917 | Gm22567 | 0.0000 | No |
| 20918 | Gm22569 | 0.0000 | No |
| 20919 | Gm22571 | 0.0000 | No |
| 20920 | Gm22572 | 0.0000 | No |
| 20921 | Gm22573 | 0.0000 | No |
| 20922 | Gm22574 | 0.0000 | No |
| 20923 | Gm22575 | 0.0000 | No |
| 20924 | Gm22576 | 0.0000 | No |
| 20925 | Gm22577 | 0.0000 | No |
| 20926 | Gm22578 | 0.0000 | No |
| 20927 | Gm22579 | 0.0000 | No |

|       |         |        |    |
|-------|---------|--------|----|
| 20928 | Gm22580 | 0.0000 | No |
| 20929 | Gm22581 | 0.0000 | No |
| 20930 | Gm22582 | 0.0000 | No |
| 20931 | Gm22583 | 0.0000 | No |
| 20932 | Gm22584 | 0.0000 | No |
| 20933 | Gm22588 | 0.0000 | No |
| 20934 | Gm22589 | 0.0000 | No |
| 20935 | Gm22590 | 0.0000 | No |
| 20936 | Gm22591 | 0.0000 | No |
| 20937 | Gm22593 | 0.0000 | No |
| 20938 | Gm22594 | 0.0000 | No |
| 20939 | Gm22595 | 0.0000 | No |
| 20940 | Gm22596 | 0.0000 | No |
| 20941 | Gm22597 | 0.0000 | No |
| 20942 | Gm22598 | 0.0000 | No |
| 20943 | Gm22599 | 0.0000 | No |
| 20944 | Gm2260  | 0.0000 | No |
| 20945 | Gm22600 | 0.0000 | No |
| 20946 | Gm22601 | 0.0000 | No |
| 20947 | Gm22602 | 0.0000 | No |
| 20948 | Gm22603 | 0.0000 | No |
| 20949 | Gm22604 | 0.0000 | No |
| 20950 | Gm22605 | 0.0000 | No |
| 20951 | Gm22606 | 0.0000 | No |
| 20952 | Gm22607 | 0.0000 | No |
| 20953 | Gm22608 | 0.0000 | No |
| 20954 | Gm22609 | 0.0000 | No |
| 20955 | Gm22611 | 0.0000 | No |
| 20956 | Gm22612 | 0.0000 | No |
| 20957 | Gm22614 | 0.0000 | No |
| 20958 | Gm22615 | 0.0000 | No |
| 20959 | Gm22617 | 0.0000 | No |
| 20960 | Gm22618 | 0.0000 | No |
| 20961 | Gm22619 | 0.0000 | No |
| 20962 | Gm22620 | 0.0000 | No |
| 20963 | Gm22622 | 0.0000 | No |
| 20964 | Gm22623 | 0.0000 | No |
| 20965 | Gm22625 | 0.0000 | No |
| 20966 | Gm22626 | 0.0000 | No |
| 20967 | Gm22627 | 0.0000 | No |
| 20968 | Gm22628 | 0.0000 | No |
| 20969 | Gm22629 | 0.0000 | No |
| 20970 | Gm22630 | 0.0000 | No |
| 20971 | Gm22631 | 0.0000 | No |
| 20972 | Gm22632 | 0.0000 | No |
| 20973 | Gm22633 | 0.0000 | No |



|       |         |        |    |
|-------|---------|--------|----|
| 20974 | Gm22634 | 0.0000 | No |
| 20975 | Gm22635 | 0.0000 | No |
| 20976 | Gm22638 | 0.0000 | No |
| 20977 | Gm22639 | 0.0000 | No |
| 20978 | Gm22640 | 0.0000 | No |
| 20979 | Gm22642 | 0.0000 | No |
| 20980 | Gm22643 | 0.0000 | No |
| 20981 | Gm22645 | 0.0000 | No |
| 20982 | Gm22646 | 0.0000 | No |
| 20983 | Gm22649 | 0.0000 | No |
| 20984 | Gm22652 | 0.0000 | No |
| 20985 | Gm22654 | 0.0000 | No |
| 20986 | Gm22655 | 0.0000 | No |
| 20987 | Gm22656 | 0.0000 | No |
| 20988 | Gm22658 | 0.0000 | No |
| 20989 | Gm22659 | 0.0000 | No |
| 20990 | Gm22660 | 0.0000 | No |
| 20991 | Gm22661 | 0.0000 | No |
| 20992 | Gm22662 | 0.0000 | No |
| 20993 | Gm22663 | 0.0000 | No |
| 20994 | Gm22664 | 0.0000 | No |
| 20995 | Gm22665 | 0.0000 | No |
| 20996 | Gm22666 | 0.0000 | No |
| 20997 | Gm22667 | 0.0000 | No |
| 20998 | Gm22668 | 0.0000 | No |
| 20999 | Gm22669 | 0.0000 | No |
| 21000 | Gm22670 | 0.0000 | No |
| 21001 | Gm22671 | 0.0000 | No |
| 21002 | Gm22672 | 0.0000 | No |
| 21003 | Gm22673 | 0.0000 | No |
| 21004 | Gm22674 | 0.0000 | No |
| 21005 | Gm22675 | 0.0000 | No |
| 21006 | Gm22676 | 0.0000 | No |
| 21007 | Gm22677 | 0.0000 | No |
| 21008 | Gm22679 | 0.0000 | No |
| 21009 | Gm22680 | 0.0000 | No |
| 21010 | Gm22681 | 0.0000 | No |
| 21011 | Gm22682 | 0.0000 | No |
| 21012 | Gm22683 | 0.0000 | No |
| 21013 | Gm22684 | 0.0000 | No |
| 21014 | Gm22685 | 0.0000 | No |
| 21015 | Gm22686 | 0.0000 | No |
| 21016 | Gm22689 | 0.0000 | No |
| 21017 | Gm22690 | 0.0000 | No |
| 21018 | Gm22692 | 0.0000 | No |
| 21019 | Gm22693 | 0.0000 | No |

|       |         |        |    |
|-------|---------|--------|----|
| 21020 | Gm22694 | 0.0000 | No |
| 21021 | Gm22696 | 0.0000 | No |
| 21022 | Gm22697 | 0.0000 | No |
| 21023 | Gm22698 | 0.0000 | No |
| 21024 | Gm22699 | 0.0000 | No |
| 21025 | Gm22702 | 0.0000 | No |
| 21026 | Gm22704 | 0.0000 | No |
| 21027 | Gm22706 | 0.0000 | No |
| 21028 | Gm22707 | 0.0000 | No |
| 21029 | Gm22708 | 0.0000 | No |
| 21030 | Gm22709 | 0.0000 | No |
| 21031 | Gm22710 | 0.0000 | No |
| 21032 | Gm22713 | 0.0000 | No |
| 21033 | Gm22714 | 0.0000 | No |
| 21034 | Gm22716 | 0.0000 | No |
| 21035 | Gm22717 | 0.0000 | No |
| 21036 | Gm22718 | 0.0000 | No |
| 21037 | Gm2272  | 0.0000 | No |
| 21038 | Gm22720 | 0.0000 | No |
| 21039 | Gm22721 | 0.0000 | No |
| 21040 | Gm22722 | 0.0000 | No |
| 21041 | Gm22724 | 0.0000 | No |
| 21042 | Gm22725 | 0.0000 | No |
| 21043 | Gm22727 | 0.0000 | No |
| 21044 | Gm22728 | 0.0000 | No |
| 21045 | Gm22729 | 0.0000 | No |
| 21046 | Gm22730 | 0.0000 | No |
| 21047 | Gm22732 | 0.0000 | No |
| 21048 | Gm22733 | 0.0000 | No |
| 21049 | Gm22738 | 0.0000 | No |
| 21050 | Gm22739 | 0.0000 | No |
| 21051 | Gm2274  | 0.0000 | No |
| 21052 | Gm22741 | 0.0000 | No |
| 21053 | Gm22743 | 0.0000 | No |
| 21054 | Gm22744 | 0.0000 | No |
| 21055 | Gm22745 | 0.0000 | No |
| 21056 | Gm22746 | 0.0000 | No |
| 21057 | Gm22747 | 0.0000 | No |
| 21058 | Gm22748 | 0.0000 | No |
| 21059 | Gm22749 | 0.0000 | No |
| 21060 | Gm22750 | 0.0000 | No |
| 21061 | Gm22751 | 0.0000 | No |
| 21062 | Gm22752 | 0.0000 | No |
| 21063 | Gm22753 | 0.0000 | No |
| 21064 | Gm22756 | 0.0000 | No |
| 21065 | Gm22757 | 0.0000 | No |

|       |         |        |    |
|-------|---------|--------|----|
| 21066 | Gm22758 | 0.0000 | No |
| 21067 | Gm22759 | 0.0000 | No |
| 21068 | Gm22760 | 0.0000 | No |
| 21069 | Gm22761 | 0.0000 | No |
| 21070 | Gm22762 | 0.0000 | No |
| 21071 | Gm22764 | 0.0000 | No |
| 21072 | Gm22765 | 0.0000 | No |
| 21073 | Gm22767 | 0.0000 | No |
| 21074 | Gm22768 | 0.0000 | No |
| 21075 | Gm22770 | 0.0000 | No |
| 21076 | Gm22771 | 0.0000 | No |
| 21077 | Gm22772 | 0.0000 | No |
| 21078 | Gm22773 | 0.0000 | No |
| 21079 | Gm22774 | 0.0000 | No |
| 21080 | Gm22775 | 0.0000 | No |
| 21081 | Gm22776 | 0.0000 | No |
| 21082 | Gm22777 | 0.0000 | No |
| 21083 | Gm22778 | 0.0000 | No |
| 21084 | Gm22780 | 0.0000 | No |
| 21085 | Gm22781 | 0.0000 | No |
| 21086 | Gm22782 | 0.0000 | No |
| 21087 | Gm22783 | 0.0000 | No |
| 21088 | Gm22784 | 0.0000 | No |
| 21089 | Gm22785 | 0.0000 | No |
| 21090 | Gm22786 | 0.0000 | No |
| 21091 | Gm22787 | 0.0000 | No |
| 21092 | Gm22788 | 0.0000 | No |
| 21093 | Gm22789 | 0.0000 | No |
| 21094 | Gm22791 | 0.0000 | No |
| 21095 | Gm22792 | 0.0000 | No |
| 21096 | Gm22793 | 0.0000 | No |
| 21097 | Gm22794 | 0.0000 | No |
| 21098 | Gm22795 | 0.0000 | No |
| 21099 | Gm22796 | 0.0000 | No |
| 21100 | Gm22797 | 0.0000 | No |
| 21101 | Gm22800 | 0.0000 | No |
| 21102 | Gm22801 | 0.0000 | No |
| 21103 | Gm22802 | 0.0000 | No |
| 21104 | Gm22803 | 0.0000 | No |
| 21105 | Gm22804 | 0.0000 | No |
| 21106 | Gm22805 | 0.0000 | No |
| 21107 | Gm22806 | 0.0000 | No |
| 21108 | Gm22807 | 0.0000 | No |
| 21109 | Gm22808 | 0.0000 | No |
| 21110 | Gm22809 | 0.0000 | No |
| 21111 | Gm22810 | 0.0000 | No |

|       |         |        |    |
|-------|---------|--------|----|
| 21112 | Gm22811 | 0.0000 | No |
| 21113 | Gm22812 | 0.0000 | No |
| 21114 | Gm22814 | 0.0000 | No |
| 21115 | Gm22815 | 0.0000 | No |
| 21116 | Gm22817 | 0.0000 | No |
| 21117 | Gm22818 | 0.0000 | No |
| 21118 | Gm22819 | 0.0000 | No |
| 21119 | Gm22820 | 0.0000 | No |
| 21120 | Gm22821 | 0.0000 | No |
| 21121 | Gm22822 | 0.0000 | No |
| 21122 | Gm22823 | 0.0000 | No |
| 21123 | Gm22824 | 0.0000 | No |
| 21124 | Gm22825 | 0.0000 | No |
| 21125 | Gm22826 | 0.0000 | No |
| 21126 | Gm22827 | 0.0000 | No |
| 21127 | Gm22829 | 0.0000 | No |
| 21128 | Gm22830 | 0.0000 | No |
| 21129 | Gm22831 | 0.0000 | No |
| 21130 | Gm22833 | 0.0000 | No |
| 21131 | Gm22834 | 0.0000 | No |
| 21132 | Gm22836 | 0.0000 | No |
| 21133 | Gm22838 | 0.0000 | No |
| 21134 | Gm22839 | 0.0000 | No |
| 21135 | Gm22840 | 0.0000 | No |
| 21136 | Gm22841 | 0.0000 | No |
| 21137 | Gm22842 | 0.0000 | No |
| 21138 | Gm22843 | 0.0000 | No |
| 21139 | Gm22845 | 0.0000 | No |
| 21140 | Gm22847 | 0.0000 | No |
| 21141 | Gm22849 | 0.0000 | No |
| 21142 | Gm22850 | 0.0000 | No |
| 21143 | Gm22851 | 0.0000 | No |
| 21144 | Gm22852 | 0.0000 | No |
| 21145 | Gm22854 | 0.0000 | No |
| 21146 | Gm22857 | 0.0000 | No |
| 21147 | Gm22858 | 0.0000 | No |
| 21148 | Gm22859 | 0.0000 | No |
| 21149 | Gm22860 | 0.0000 | No |
| 21150 | Gm22862 | 0.0000 | No |
| 21151 | Gm22863 | 0.0000 | No |
| 21152 | Gm22864 | 0.0000 | No |
| 21153 | Gm22866 | 0.0000 | No |
| 21154 | Gm22868 | 0.0000 | No |
| 21155 | Gm2287  | 0.0000 | No |
| 21156 | Gm22870 | 0.0000 | No |
| 21157 | Gm22871 | 0.0000 | No |

|       |         |        |    |
|-------|---------|--------|----|
| 21158 | Gm22875 | 0.0000 | No |
| 21159 | Gm22876 | 0.0000 | No |
| 21160 | Gm22877 | 0.0000 | No |
| 21161 | Gm22879 | 0.0000 | No |
| 21162 | Gm2288  | 0.0000 | No |
| 21163 | Gm22881 | 0.0000 | No |
| 21164 | Gm22882 | 0.0000 | No |
| 21165 | Gm22883 | 0.0000 | No |
| 21166 | Gm22885 | 0.0000 | No |
| 21167 | Gm22887 | 0.0000 | No |
| 21168 | Gm22889 | 0.0000 | No |
| 21169 | Gm22890 | 0.0000 | No |
| 21170 | Gm22891 | 0.0000 | No |
| 21171 | Gm22892 | 0.0000 | No |
| 21172 | Gm22893 | 0.0000 | No |
| 21173 | Gm22894 | 0.0000 | No |
| 21174 | Gm22895 | 0.0000 | No |
| 21175 | Gm22899 | 0.0000 | No |
| 21176 | Gm22900 | 0.0000 | No |
| 21177 | Gm22901 | 0.0000 | No |
| 21178 | Gm22902 | 0.0000 | No |
| 21179 | Gm22903 | 0.0000 | No |
| 21180 | Gm22904 | 0.0000 | No |
| 21181 | Gm22906 | 0.0000 | No |
| 21182 | Gm22907 | 0.0000 | No |
| 21183 | Gm22908 | 0.0000 | No |
| 21184 | Gm22909 | 0.0000 | No |
| 21185 | Gm22911 | 0.0000 | No |
| 21186 | Gm22912 | 0.0000 | No |
| 21187 | Gm22913 | 0.0000 | No |
| 21188 | Gm22914 | 0.0000 | No |
| 21189 | Gm22916 | 0.0000 | No |
| 21190 | Gm22918 | 0.0000 | No |
| 21191 | Gm22920 | 0.0000 | No |
| 21192 | Gm22923 | 0.0000 | No |
| 21193 | Gm22925 | 0.0000 | No |
| 21194 | Gm22926 | 0.0000 | No |
| 21195 | Gm22927 | 0.0000 | No |
| 21196 | Gm22929 | 0.0000 | No |
| 21197 | Gm22932 | 0.0000 | No |
| 21198 | Gm22933 | 0.0000 | No |
| 21199 | Gm22935 | 0.0000 | No |
| 21200 | Gm22936 | 0.0000 | No |
| 21201 | Gm22937 | 0.0000 | No |
| 21202 | Gm22938 | 0.0000 | No |
| 21203 | Gm22939 | 0.0000 | No |

|       |         |        |    |
|-------|---------|--------|----|
| 21204 | Gm22940 | 0.0000 | No |
| 21205 | Gm22941 | 0.0000 | No |
| 21206 | Gm22942 | 0.0000 | No |
| 21207 | Gm22943 | 0.0000 | No |
| 21208 | Gm22944 | 0.0000 | No |
| 21209 | Gm22945 | 0.0000 | No |
| 21210 | Gm22946 | 0.0000 | No |
| 21211 | Gm22948 | 0.0000 | No |
| 21212 | Gm22949 | 0.0000 | No |
| 21213 | Gm22952 | 0.0000 | No |
| 21214 | Gm22953 | 0.0000 | No |
| 21215 | Gm22955 | 0.0000 | No |
| 21216 | Gm22957 | 0.0000 | No |
| 21217 | Gm22958 | 0.0000 | No |
| 21218 | Gm22959 | 0.0000 | No |
| 21219 | Gm22961 | 0.0000 | No |
| 21220 | Gm22962 | 0.0000 | No |
| 21221 | Gm22963 | 0.0000 | No |
| 21222 | Gm22966 | 0.0000 | No |
| 21223 | Gm22967 | 0.0000 | No |
| 21224 | Gm22969 | 0.0000 | No |
| 21225 | Gm22970 | 0.0000 | No |
| 21226 | Gm22971 | 0.0000 | No |
| 21227 | Gm22972 | 0.0000 | No |
| 21228 | Gm22973 | 0.0000 | No |
| 21229 | Gm22974 | 0.0000 | No |
| 21230 | Gm22975 | 0.0000 | No |
| 21231 | Gm22977 | 0.0000 | No |
| 21232 | Gm22978 | 0.0000 | No |
| 21233 | Gm22979 | 0.0000 | No |
| 21234 | Gm22980 | 0.0000 | No |
| 21235 | Gm22981 | 0.0000 | No |
| 21236 | Gm22982 | 0.0000 | No |
| 21237 | Gm22983 | 0.0000 | No |
| 21238 | Gm22984 | 0.0000 | No |
| 21239 | Gm22985 | 0.0000 | No |
| 21240 | Gm22986 | 0.0000 | No |
| 21241 | Gm22987 | 0.0000 | No |
| 21242 | Gm22988 | 0.0000 | No |
| 21243 | Gm22989 | 0.0000 | No |
| 21244 | Gm22990 | 0.0000 | No |
| 21245 | Gm22991 | 0.0000 | No |
| 21246 | Gm22992 | 0.0000 | No |
| 21247 | Gm22993 | 0.0000 | No |
| 21248 | Gm22994 | 0.0000 | No |
| 21249 | Gm22995 | 0.0000 | No |

|       |         |        |    |
|-------|---------|--------|----|
| 21250 | Gm22996 | 0.0000 | No |
| 21251 | Gm22997 | 0.0000 | No |
| 21252 | Gm22999 | 0.0000 | No |
| 21253 | Gm23000 | 0.0000 | No |
| 21254 | Gm23003 | 0.0000 | No |
| 21255 | Gm23005 | 0.0000 | No |
| 21256 | Gm23007 | 0.0000 | No |
| 21257 | Gm23008 | 0.0000 | No |
| 21258 | Gm23010 | 0.0000 | No |
| 21259 | Gm23011 | 0.0000 | No |
| 21260 | Gm23012 | 0.0000 | No |
| 21261 | Gm23013 | 0.0000 | No |
| 21262 | Gm23015 | 0.0000 | No |
| 21263 | Gm23016 | 0.0000 | No |
| 21264 | Gm23017 | 0.0000 | No |
| 21265 | Gm23018 | 0.0000 | No |
| 21266 | Gm23020 | 0.0000 | No |
| 21267 | Gm23021 | 0.0000 | No |
| 21268 | Gm23022 | 0.0000 | No |
| 21269 | Gm23024 | 0.0000 | No |
| 21270 | Gm23025 | 0.0000 | No |
| 21271 | Gm23026 | 0.0000 | No |
| 21272 | Gm23027 | 0.0000 | No |
| 21273 | Gm23028 | 0.0000 | No |
| 21274 | Gm23030 | 0.0000 | No |
| 21275 | Gm23031 | 0.0000 | No |
| 21276 | Gm23032 | 0.0000 | No |
| 21277 | Gm23033 | 0.0000 | No |
| 21278 | Gm23034 | 0.0000 | No |
| 21279 | Gm23035 | 0.0000 | No |
| 21280 | Gm23036 | 0.0000 | No |
| 21281 | Gm23037 | 0.0000 | No |
| 21282 | Gm23038 | 0.0000 | No |
| 21283 | Gm23040 | 0.0000 | No |
| 21284 | Gm23041 | 0.0000 | No |
| 21285 | Gm23042 | 0.0000 | No |
| 21286 | Gm23043 | 0.0000 | No |
| 21287 | Gm23044 | 0.0000 | No |
| 21288 | Gm23045 | 0.0000 | No |
| 21289 | Gm23047 | 0.0000 | No |
| 21290 | Gm23048 | 0.0000 | No |
| 21291 | Gm23049 | 0.0000 | No |
| 21292 | Gm23050 | 0.0000 | No |
| 21293 | Gm23053 | 0.0000 | No |
| 21294 | Gm23054 | 0.0000 | No |
| 21295 | Gm23055 | 0.0000 | No |

|       |         |        |    |
|-------|---------|--------|----|
| 21296 | Gm23056 | 0.0000 | No |
| 21297 | Gm23057 | 0.0000 | No |
| 21298 | Gm23058 | 0.0000 | No |
| 21299 | Gm23059 | 0.0000 | No |
| 21300 | Gm23060 | 0.0000 | No |
| 21301 | Gm23061 | 0.0000 | No |
| 21302 | Gm23062 | 0.0000 | No |
| 21303 | Gm23063 | 0.0000 | No |
| 21304 | Gm23064 | 0.0000 | No |
| 21305 | Gm23066 | 0.0000 | No |
| 21306 | Gm23067 | 0.0000 | No |
| 21307 | Gm23068 | 0.0000 | No |
| 21308 | Gm23069 | 0.0000 | No |
| 21309 | Gm23072 | 0.0000 | No |
| 21310 | Gm23075 | 0.0000 | No |
| 21311 | Gm23076 | 0.0000 | No |
| 21312 | Gm23077 | 0.0000 | No |
| 21313 | Gm23078 | 0.0000 | No |
| 21314 | Gm23079 | 0.0000 | No |
| 21315 | Gm2308  | 0.0000 | No |
| 21316 | Gm23080 | 0.0000 | No |
| 21317 | Gm23081 | 0.0000 | No |
| 21318 | Gm23082 | 0.0000 | No |
| 21319 | Gm23083 | 0.0000 | No |
| 21320 | Gm23085 | 0.0000 | No |
| 21321 | Gm23086 | 0.0000 | No |
| 21322 | Gm23087 | 0.0000 | No |
| 21323 | Gm23089 | 0.0000 | No |
| 21324 | Gm2309  | 0.0000 | No |
| 21325 | Gm23090 | 0.0000 | No |
| 21326 | Gm23092 | 0.0000 | No |
| 21327 | Gm23093 | 0.0000 | No |
| 21328 | Gm23094 | 0.0000 | No |
| 21329 | Gm23095 | 0.0000 | No |
| 21330 | Gm23096 | 0.0000 | No |
| 21331 | Gm23097 | 0.0000 | No |
| 21332 | Gm23098 | 0.0000 | No |
| 21333 | Gm23099 | 0.0000 | No |
| 21334 | Gm2310  | 0.0000 | No |
| 21335 | Gm23100 | 0.0000 | No |
| 21336 | Gm23101 | 0.0000 | No |
| 21337 | Gm23102 | 0.0000 | No |
| 21338 | Gm23103 | 0.0000 | No |
| 21339 | Gm23104 | 0.0000 | No |
| 21340 | Gm23105 | 0.0000 | No |
| 21341 | Gm23106 | 0.0000 | No |



|       |         |        |    |
|-------|---------|--------|----|
| 21342 | Gm23108 | 0.0000 | No |
| 21343 | Gm23109 | 0.0000 | No |
| 21344 | Gm23111 | 0.0000 | No |
| 21345 | Gm23116 | 0.0000 | No |
| 21346 | Gm23117 | 0.0000 | No |
| 21347 | Gm23118 | 0.0000 | No |
| 21348 | Gm23119 | 0.0000 | No |
| 21349 | Gm23120 | 0.0000 | No |
| 21350 | Gm23121 | 0.0000 | No |
| 21351 | Gm23122 | 0.0000 | No |
| 21352 | Gm23124 | 0.0000 | No |
| 21353 | Gm23125 | 0.0000 | No |
| 21354 | Gm23126 | 0.0000 | No |
| 21355 | Gm23127 | 0.0000 | No |
| 21356 | Gm23129 | 0.0000 | No |
| 21357 | Gm23130 | 0.0000 | No |
| 21358 | Gm23131 | 0.0000 | No |
| 21359 | Gm23132 | 0.0000 | No |
| 21360 | Gm23133 | 0.0000 | No |
| 21361 | Gm23134 | 0.0000 | No |
| 21362 | Gm23136 | 0.0000 | No |
| 21363 | Gm23137 | 0.0000 | No |
| 21364 | Gm23138 | 0.0000 | No |
| 21365 | Gm23139 | 0.0000 | No |
| 21366 | Gm2314  | 0.0000 | No |
| 21367 | Gm23140 | 0.0000 | No |
| 21368 | Gm23142 | 0.0000 | No |
| 21369 | Gm23144 | 0.0000 | No |
| 21370 | Gm23145 | 0.0000 | No |
| 21371 | Gm23147 | 0.0000 | No |
| 21372 | Gm23148 | 0.0000 | No |
| 21373 | Gm23149 | 0.0000 | No |
| 21374 | Gm23151 | 0.0000 | No |
| 21375 | Gm23153 | 0.0000 | No |
| 21376 | Gm23154 | 0.0000 | No |
| 21377 | Gm23156 | 0.0000 | No |
| 21378 | Gm23158 | 0.0000 | No |
| 21379 | Gm23159 | 0.0000 | No |
| 21380 | Gm2316  | 0.0000 | No |
| 21381 | Gm23162 | 0.0000 | No |
| 21382 | Gm23163 | 0.0000 | No |
| 21383 | Gm23164 | 0.0000 | No |
| 21384 | Gm23166 | 0.0000 | No |
| 21385 | Gm23167 | 0.0000 | No |
| 21386 | Gm23168 | 0.0000 | No |
| 21387 | Gm23169 | 0.0000 | No |

|       |         |        |    |
|-------|---------|--------|----|
| 21388 | Gm23171 | 0.0000 | No |
| 21389 | Gm23172 | 0.0000 | No |
| 21390 | Gm23173 | 0.0000 | No |
| 21391 | Gm23175 | 0.0000 | No |
| 21392 | Gm23176 | 0.0000 | No |
| 21393 | Gm23177 | 0.0000 | No |
| 21394 | Gm23179 | 0.0000 | No |
| 21395 | Gm2318  | 0.0000 | No |
| 21396 | Gm23180 | 0.0000 | No |
| 21397 | Gm23181 | 0.0000 | No |
| 21398 | Gm23182 | 0.0000 | No |
| 21399 | Gm23183 | 0.0000 | No |
| 21400 | Gm23184 | 0.0000 | No |
| 21401 | Gm23185 | 0.0000 | No |
| 21402 | Gm23187 | 0.0000 | No |
| 21403 | Gm23190 | 0.0000 | No |
| 21404 | Gm23191 | 0.0000 | No |
| 21405 | Gm23192 | 0.0000 | No |
| 21406 | Gm23193 | 0.0000 | No |
| 21407 | Gm23194 | 0.0000 | No |
| 21408 | Gm23195 | 0.0000 | No |
| 21409 | Gm23197 | 0.0000 | No |
| 21410 | Gm23199 | 0.0000 | No |
| 21411 | Gm23200 | 0.0000 | No |
| 21412 | Gm23201 | 0.0000 | No |
| 21413 | Gm23203 | 0.0000 | No |
| 21414 | Gm23205 | 0.0000 | No |
| 21415 | Gm23207 | 0.0000 | No |
| 21416 | Gm23208 | 0.0000 | No |
| 21417 | Gm23209 | 0.0000 | No |
| 21418 | Gm23210 | 0.0000 | No |
| 21419 | Gm23211 | 0.0000 | No |
| 21420 | Gm23212 | 0.0000 | No |
| 21421 | Gm23213 | 0.0000 | No |
| 21422 | Gm23214 | 0.0000 | No |
| 21423 | Gm23215 | 0.0000 | No |
| 21424 | Gm23216 | 0.0000 | No |
| 21425 | Gm23217 | 0.0000 | No |
| 21426 | Gm23218 | 0.0000 | No |
| 21427 | Gm23219 | 0.0000 | No |
| 21428 | Gm23220 | 0.0000 | No |
| 21429 | Gm23221 | 0.0000 | No |
| 21430 | Gm23222 | 0.0000 | No |
| 21431 | Gm23223 | 0.0000 | No |
| 21432 | Gm23224 | 0.0000 | No |
| 21433 | Gm23225 | 0.0000 | No |

|       |         |        |    |
|-------|---------|--------|----|
| 21434 | Gm23226 | 0.0000 | No |
| 21435 | Gm23228 | 0.0000 | No |
| 21436 | Gm23229 | 0.0000 | No |
| 21437 | Gm23230 | 0.0000 | No |
| 21438 | Gm23231 | 0.0000 | No |
| 21439 | Gm23232 | 0.0000 | No |
| 21440 | Gm23233 | 0.0000 | No |
| 21441 | Gm23234 | 0.0000 | No |
| 21442 | Gm23237 | 0.0000 | No |
| 21443 | Gm23238 | 0.0000 | No |
| 21444 | Gm23239 | 0.0000 | No |
| 21445 | Gm2324  | 0.0000 | No |
| 21446 | Gm23241 | 0.0000 | No |
| 21447 | Gm23242 | 0.0000 | No |
| 21448 | Gm23243 | 0.0000 | No |
| 21449 | Gm23244 | 0.0000 | No |
| 21450 | Gm23245 | 0.0000 | No |
| 21451 | Gm23246 | 0.0000 | No |
| 21452 | Gm23247 | 0.0000 | No |
| 21453 | Gm23248 | 0.0000 | No |
| 21454 | Gm23249 | 0.0000 | No |
| 21455 | Gm2325  | 0.0000 | No |
| 21456 | Gm23251 | 0.0000 | No |
| 21457 | Gm23252 | 0.0000 | No |
| 21458 | Gm23253 | 0.0000 | No |
| 21459 | Gm23254 | 0.0000 | No |
| 21460 | Gm23255 | 0.0000 | No |
| 21461 | Gm23256 | 0.0000 | No |
| 21462 | Gm23258 | 0.0000 | No |
| 21463 | Gm23259 | 0.0000 | No |
| 21464 | Gm23260 | 0.0000 | No |
| 21465 | Gm23261 | 0.0000 | No |
| 21466 | Gm23263 | 0.0000 | No |
| 21467 | Gm23264 | 0.0000 | No |
| 21468 | Gm23265 | 0.0000 | No |
| 21469 | Gm23266 | 0.0000 | No |
| 21470 | Gm23267 | 0.0000 | No |
| 21471 | Gm23268 | 0.0000 | No |
| 21472 | Gm23269 | 0.0000 | No |
| 21473 | Gm23270 | 0.0000 | No |
| 21474 | Gm23271 | 0.0000 | No |
| 21475 | Gm23272 | 0.0000 | No |
| 21476 | Gm23273 | 0.0000 | No |
| 21477 | Gm23275 | 0.0000 | No |
| 21478 | Gm23276 | 0.0000 | No |
| 21479 | Gm23277 | 0.0000 | No |

|       |         |        |    |
|-------|---------|--------|----|
| 21480 | Gm23278 | 0.0000 | No |
| 21481 | Gm2328  | 0.0000 | No |
| 21482 | Gm23280 | 0.0000 | No |
| 21483 | Gm23282 | 0.0000 | No |
| 21484 | Gm23283 | 0.0000 | No |
| 21485 | Gm23286 | 0.0000 | No |
| 21486 | Gm23287 | 0.0000 | No |
| 21487 | Gm23288 | 0.0000 | No |
| 21488 | Gm23292 | 0.0000 | No |
| 21489 | Gm23296 | 0.0000 | No |
| 21490 | Gm23297 | 0.0000 | No |
| 21491 | Gm23298 | 0.0000 | No |
| 21492 | Gm23299 | 0.0000 | No |
| 21493 | Gm23300 | 0.0000 | No |
| 21494 | Gm23301 | 0.0000 | No |
| 21495 | Gm23302 | 0.0000 | No |
| 21496 | Gm23303 | 0.0000 | No |
| 21497 | Gm23304 | 0.0000 | No |
| 21498 | Gm23305 | 0.0000 | No |
| 21499 | Gm23306 | 0.0000 | No |
| 21500 | Gm23307 | 0.0000 | No |
| 21501 | Gm23308 | 0.0000 | No |
| 21502 | Gm23310 | 0.0000 | No |
| 21503 | Gm23311 | 0.0000 | No |
| 21504 | Gm23312 | 0.0000 | No |
| 21505 | Gm23313 | 0.0000 | No |
| 21506 | Gm23314 | 0.0000 | No |
| 21507 | Gm23315 | 0.0000 | No |
| 21508 | Gm23316 | 0.0000 | No |
| 21509 | Gm23317 | 0.0000 | No |
| 21510 | Gm23318 | 0.0000 | No |
| 21511 | Gm23319 | 0.0000 | No |
| 21512 | Gm23320 | 0.0000 | No |
| 21513 | Gm23321 | 0.0000 | No |
| 21514 | Gm23322 | 0.0000 | No |
| 21515 | Gm23323 | 0.0000 | No |
| 21516 | Gm23327 | 0.0000 | No |
| 21517 | Gm23328 | 0.0000 | No |
| 21518 | Gm23329 | 0.0000 | No |
| 21519 | Gm23330 | 0.0000 | No |
| 21520 | Gm23331 | 0.0000 | No |
| 21521 | Gm23332 | 0.0000 | No |
| 21522 | Gm23334 | 0.0000 | No |
| 21523 | Gm23335 | 0.0000 | No |
| 21524 | Gm23336 | 0.0000 | No |
| 21525 | Gm23337 | 0.0000 | No |

|       |         |        |    |
|-------|---------|--------|----|
| 21526 | Gm23338 | 0.0000 | No |
| 21527 | Gm23339 | 0.0000 | No |
| 21528 | Gm23340 | 0.0000 | No |
| 21529 | Gm23341 | 0.0000 | No |
| 21530 | Gm23343 | 0.0000 | No |
| 21531 | Gm23344 | 0.0000 | No |
| 21532 | Gm23345 | 0.0000 | No |
| 21533 | Gm23346 | 0.0000 | No |
| 21534 | Gm23347 | 0.0000 | No |
| 21535 | Gm23349 | 0.0000 | No |
| 21536 | Gm23350 | 0.0000 | No |
| 21537 | Gm23351 | 0.0000 | No |
| 21538 | Gm23352 | 0.0000 | No |
| 21539 | Gm23353 | 0.0000 | No |
| 21540 | Gm23354 | 0.0000 | No |
| 21541 | Gm23355 | 0.0000 | No |
| 21542 | Gm23356 | 0.0000 | No |
| 21543 | Gm23358 | 0.0000 | No |
| 21544 | Gm23362 | 0.0000 | No |
| 21545 | Gm23363 | 0.0000 | No |
| 21546 | Gm23364 | 0.0000 | No |
| 21547 | Gm23365 | 0.0000 | No |
| 21548 | Gm23366 | 0.0000 | No |
| 21549 | Gm23368 | 0.0000 | No |
| 21550 | Gm23369 | 0.0000 | No |
| 21551 | Gm23370 | 0.0000 | No |
| 21552 | Gm23374 | 0.0000 | No |
| 21553 | Gm23375 | 0.0000 | No |
| 21554 | Gm23376 | 0.0000 | No |
| 21555 | Gm23378 | 0.0000 | No |
| 21556 | Gm23379 | 0.0000 | No |
| 21557 | Gm23382 | 0.0000 | No |
| 21558 | Gm23384 | 0.0000 | No |
| 21559 | Gm23385 | 0.0000 | No |
| 21560 | Gm23386 | 0.0000 | No |
| 21561 | Gm23387 | 0.0000 | No |
| 21562 | Gm23388 | 0.0000 | No |
| 21563 | Gm23389 | 0.0000 | No |
| 21564 | Gm23390 | 0.0000 | No |
| 21565 | Gm23391 | 0.0000 | No |
| 21566 | Gm23393 | 0.0000 | No |
| 21567 | Gm23394 | 0.0000 | No |
| 21568 | Gm23400 | 0.0000 | No |
| 21569 | Gm23402 | 0.0000 | No |
| 21570 | Gm23403 | 0.0000 | No |
| 21571 | Gm23404 | 0.0000 | No |

|       |         |        |    |
|-------|---------|--------|----|
| 21572 | Gm23405 | 0.0000 | No |
| 21573 | Gm23406 | 0.0000 | No |
| 21574 | Gm23407 | 0.0000 | No |
| 21575 | Gm23408 | 0.0000 | No |
| 21576 | Gm23409 | 0.0000 | No |
| 21577 | Gm23410 | 0.0000 | No |
| 21578 | Gm23411 | 0.0000 | No |
| 21579 | Gm23412 | 0.0000 | No |
| 21580 | Gm23413 | 0.0000 | No |
| 21581 | Gm23415 | 0.0000 | No |
| 21582 | Gm23416 | 0.0000 | No |
| 21583 | Gm23417 | 0.0000 | No |
| 21584 | Gm23419 | 0.0000 | No |
| 21585 | Gm23421 | 0.0000 | No |
| 21586 | Gm23422 | 0.0000 | No |
| 21587 | Gm23423 | 0.0000 | No |
| 21588 | Gm23424 | 0.0000 | No |
| 21589 | Gm23426 | 0.0000 | No |
| 21590 | Gm23428 | 0.0000 | No |
| 21591 | Gm23429 | 0.0000 | No |
| 21592 | Gm23430 | 0.0000 | No |
| 21593 | Gm23431 | 0.0000 | No |
| 21594 | Gm23432 | 0.0000 | No |
| 21595 | Gm23434 | 0.0000 | No |
| 21596 | Gm23437 | 0.0000 | No |
| 21597 | Gm23438 | 0.0000 | No |
| 21598 | Gm23439 | 0.0000 | No |
| 21599 | Gm23440 | 0.0000 | No |
| 21600 | Gm23441 | 0.0000 | No |
| 21601 | Gm23442 | 0.0000 | No |
| 21602 | Gm23443 | 0.0000 | No |
| 21603 | Gm23446 | 0.0000 | No |
| 21604 | Gm23447 | 0.0000 | No |
| 21605 | Gm23448 | 0.0000 | No |
| 21606 | Gm23449 | 0.0000 | No |
| 21607 | Gm2345  | 0.0000 | No |
| 21608 | Gm23450 | 0.0000 | No |
| 21609 | Gm23451 | 0.0000 | No |
| 21610 | Gm23452 | 0.0000 | No |
| 21611 | Gm23453 | 0.0000 | No |
| 21612 | Gm23454 | 0.0000 | No |
| 21613 | Gm23455 | 0.0000 | No |
| 21614 | Gm23456 | 0.0000 | No |
| 21615 | Gm23458 | 0.0000 | No |
| 21616 | Gm23459 | 0.0000 | No |
| 21617 | Gm23460 | 0.0000 | No |

|       |         |        |    |
|-------|---------|--------|----|
| 21618 | Gm23461 | 0.0000 | No |
| 21619 | Gm23462 | 0.0000 | No |
| 21620 | Gm23463 | 0.0000 | No |
| 21621 | Gm23464 | 0.0000 | No |
| 21622 | Gm23465 | 0.0000 | No |
| 21623 | Gm23467 | 0.0000 | No |
| 21624 | Gm23468 | 0.0000 | No |
| 21625 | Gm23469 | 0.0000 | No |
| 21626 | Gm23470 | 0.0000 | No |
| 21627 | Gm23471 | 0.0000 | No |
| 21628 | Gm23472 | 0.0000 | No |
| 21629 | Gm23474 | 0.0000 | No |
| 21630 | Gm23475 | 0.0000 | No |
| 21631 | Gm23476 | 0.0000 | No |
| 21632 | Gm23477 | 0.0000 | No |
| 21633 | Gm23479 | 0.0000 | No |
| 21634 | Gm23481 | 0.0000 | No |
| 21635 | Gm23482 | 0.0000 | No |
| 21636 | Gm23483 | 0.0000 | No |
| 21637 | Gm23484 | 0.0000 | No |
| 21638 | Gm23485 | 0.0000 | No |
| 21639 | Gm23490 | 0.0000 | No |
| 21640 | Gm23492 | 0.0000 | No |
| 21641 | Gm23494 | 0.0000 | No |
| 21642 | Gm23496 | 0.0000 | No |
| 21643 | Gm23497 | 0.0000 | No |
| 21644 | Gm23498 | 0.0000 | No |
| 21645 | Gm23499 | 0.0000 | No |
| 21646 | Gm23500 | 0.0000 | No |
| 21647 | Gm23501 | 0.0000 | No |
| 21648 | Gm23502 | 0.0000 | No |
| 21649 | Gm23503 | 0.0000 | No |
| 21650 | Gm23504 | 0.0000 | No |
| 21651 | Gm23505 | 0.0000 | No |
| 21652 | Gm23506 | 0.0000 | No |
| 21653 | Gm23507 | 0.0000 | No |
| 21654 | Gm23508 | 0.0000 | No |
| 21655 | Gm23509 | 0.0000 | No |
| 21656 | Gm23511 | 0.0000 | No |
| 21657 | Gm23512 | 0.0000 | No |
| 21658 | Gm23513 | 0.0000 | No |
| 21659 | Gm23514 | 0.0000 | No |
| 21660 | Gm23515 | 0.0000 | No |
| 21661 | Gm23516 | 0.0000 | No |
| 21662 | Gm23517 | 0.0000 | No |
| 21663 | Gm23518 | 0.0000 | No |

|       |         |        |    |
|-------|---------|--------|----|
| 21664 | Gm23520 | 0.0000 | No |
| 21665 | Gm23521 | 0.0000 | No |
| 21666 | Gm23527 | 0.0000 | No |
| 21667 | Gm23528 | 0.0000 | No |
| 21668 | Gm23529 | 0.0000 | No |
| 21669 | Gm23530 | 0.0000 | No |
| 21670 | Gm23531 | 0.0000 | No |
| 21671 | Gm23532 | 0.0000 | No |
| 21672 | Gm23533 | 0.0000 | No |
| 21673 | Gm23534 | 0.0000 | No |
| 21674 | Gm23535 | 0.0000 | No |
| 21675 | Gm23537 | 0.0000 | No |
| 21676 | Gm23538 | 0.0000 | No |
| 21677 | Gm23539 | 0.0000 | No |
| 21678 | Gm23540 | 0.0000 | No |
| 21679 | Gm23542 | 0.0000 | No |
| 21680 | Gm23543 | 0.0000 | No |
| 21681 | Gm23545 | 0.0000 | No |
| 21682 | Gm23547 | 0.0000 | No |
| 21683 | Gm23548 | 0.0000 | No |
| 21684 | Gm23550 | 0.0000 | No |
| 21685 | Gm23551 | 0.0000 | No |
| 21686 | Gm23553 | 0.0000 | No |
| 21687 | Gm23554 | 0.0000 | No |
| 21688 | Gm23555 | 0.0000 | No |
| 21689 | Gm23556 | 0.0000 | No |
| 21690 | Gm23557 | 0.0000 | No |
| 21691 | Gm23559 | 0.0000 | No |
| 21692 | Gm23560 | 0.0000 | No |
| 21693 | Gm23561 | 0.0000 | No |
| 21694 | Gm23562 | 0.0000 | No |
| 21695 | Gm23563 | 0.0000 | No |
| 21696 | Gm23564 | 0.0000 | No |
| 21697 | Gm23566 | 0.0000 | No |
| 21698 | Gm23567 | 0.0000 | No |
| 21699 | Gm23568 | 0.0000 | No |
| 21700 | Gm23569 | 0.0000 | No |
| 21701 | Gm23570 | 0.0000 | No |
| 21702 | Gm23571 | 0.0000 | No |
| 21703 | Gm23573 | 0.0000 | No |
| 21704 | Gm23575 | 0.0000 | No |
| 21705 | Gm23576 | 0.0000 | No |
| 21706 | Gm23577 | 0.0000 | No |
| 21707 | Gm23578 | 0.0000 | No |
| 21708 | Gm23579 | 0.0000 | No |
| 21709 | Gm23581 | 0.0000 | No |



|       |         |        |    |
|-------|---------|--------|----|
| 21710 | Gm23582 | 0.0000 | No |
| 21711 | Gm23584 | 0.0000 | No |
| 21712 | Gm23585 | 0.0000 | No |
| 21713 | Gm23586 | 0.0000 | No |
| 21714 | Gm23587 | 0.0000 | No |
| 21715 | Gm23588 | 0.0000 | No |
| 21716 | Gm23589 | 0.0000 | No |
| 21717 | Gm23590 | 0.0000 | No |
| 21718 | Gm23591 | 0.0000 | No |
| 21719 | Gm23592 | 0.0000 | No |
| 21720 | Gm23593 | 0.0000 | No |
| 21721 | Gm23594 | 0.0000 | No |
| 21722 | Gm23595 | 0.0000 | No |
| 21723 | Gm23596 | 0.0000 | No |
| 21724 | Gm23599 | 0.0000 | No |
| 21725 | Gm23600 | 0.0000 | No |
| 21726 | Gm23601 | 0.0000 | No |
| 21727 | Gm23602 | 0.0000 | No |
| 21728 | Gm23604 | 0.0000 | No |
| 21729 | Gm23605 | 0.0000 | No |
| 21730 | Gm23606 | 0.0000 | No |
| 21731 | Gm23607 | 0.0000 | No |
| 21732 | Gm23610 | 0.0000 | No |
| 21733 | Gm23612 | 0.0000 | No |
| 21734 | Gm23613 | 0.0000 | No |
| 21735 | Gm23614 | 0.0000 | No |
| 21736 | Gm23615 | 0.0000 | No |
| 21737 | Gm23616 | 0.0000 | No |
| 21738 | Gm23617 | 0.0000 | No |
| 21739 | Gm23618 | 0.0000 | No |
| 21740 | Gm23619 | 0.0000 | No |
| 21741 | Gm23620 | 0.0000 | No |
| 21742 | Gm23623 | 0.0000 | No |
| 21743 | Gm23624 | 0.0000 | No |
| 21744 | Gm23625 | 0.0000 | No |
| 21745 | Gm23626 | 0.0000 | No |
| 21746 | Gm23627 | 0.0000 | No |
| 21747 | Gm23628 | 0.0000 | No |
| 21748 | Gm23629 | 0.0000 | No |
| 21749 | Gm23630 | 0.0000 | No |
| 21750 | Gm23631 | 0.0000 | No |
| 21751 | Gm23632 | 0.0000 | No |
| 21752 | Gm23633 | 0.0000 | No |
| 21753 | Gm23634 | 0.0000 | No |
| 21754 | Gm23636 | 0.0000 | No |
| 21755 | Gm23637 | 0.0000 | No |

|       |         |        |    |
|-------|---------|--------|----|
| 21756 | Gm23638 | 0.0000 | No |
| 21757 | Gm23639 | 0.0000 | No |
| 21758 | Gm23640 | 0.0000 | No |
| 21759 | Gm23641 | 0.0000 | No |
| 21760 | Gm23642 | 0.0000 | No |
| 21761 | Gm23643 | 0.0000 | No |
| 21762 | Gm23644 | 0.0000 | No |
| 21763 | Gm23645 | 0.0000 | No |
| 21764 | Gm23646 | 0.0000 | No |
| 21765 | Gm23648 | 0.0000 | No |
| 21766 | Gm23649 | 0.0000 | No |
| 21767 | Gm23650 | 0.0000 | No |
| 21768 | Gm23651 | 0.0000 | No |
| 21769 | Gm23652 | 0.0000 | No |
| 21770 | Gm23653 | 0.0000 | No |
| 21771 | Gm23655 | 0.0000 | No |
| 21772 | Gm23656 | 0.0000 | No |
| 21773 | Gm23657 | 0.0000 | No |
| 21774 | Gm23658 | 0.0000 | No |
| 21775 | Gm23659 | 0.0000 | No |
| 21776 | Gm2366  | 0.0000 | No |
| 21777 | Gm23660 | 0.0000 | No |
| 21778 | Gm23661 | 0.0000 | No |
| 21779 | Gm23663 | 0.0000 | No |
| 21780 | Gm23664 | 0.0000 | No |
| 21781 | Gm23665 | 0.0000 | No |
| 21782 | Gm23666 | 0.0000 | No |
| 21783 | Gm23669 | 0.0000 | No |
| 21784 | Gm2367  | 0.0000 | No |
| 21785 | Gm23670 | 0.0000 | No |
| 21786 | Gm23671 | 0.0000 | No |
| 21787 | Gm23672 | 0.0000 | No |
| 21788 | Gm23673 | 0.0000 | No |
| 21789 | Gm23674 | 0.0000 | No |
| 21790 | Gm23675 | 0.0000 | No |
| 21791 | Gm23676 | 0.0000 | No |
| 21792 | Gm23677 | 0.0000 | No |
| 21793 | Gm23678 | 0.0000 | No |
| 21794 | Gm23679 | 0.0000 | No |
| 21795 | Gm23680 | 0.0000 | No |
| 21796 | Gm23681 | 0.0000 | No |
| 21797 | Gm23682 | 0.0000 | No |
| 21798 | Gm23686 | 0.0000 | No |
| 21799 | Gm23687 | 0.0000 | No |
| 21800 | Gm23688 | 0.0000 | No |
| 21801 | Gm23689 | 0.0000 | No |

|       |         |        |    |
|-------|---------|--------|----|
| 21802 | Gm23690 | 0.0000 | No |
| 21803 | Gm23691 | 0.0000 | No |
| 21804 | Gm23692 | 0.0000 | No |
| 21805 | Gm23694 | 0.0000 | No |
| 21806 | Gm23697 | 0.0000 | No |
| 21807 | Gm23698 | 0.0000 | No |
| 21808 | Gm23699 | 0.0000 | No |
| 21809 | Gm23700 | 0.0000 | No |
| 21810 | Gm23701 | 0.0000 | No |
| 21811 | Gm23703 | 0.0000 | No |
| 21812 | Gm23705 | 0.0000 | No |
| 21813 | Gm23706 | 0.0000 | No |
| 21814 | Gm23707 | 0.0000 | No |
| 21815 | Gm23708 | 0.0000 | No |
| 21816 | Gm23709 | 0.0000 | No |
| 21817 | Gm23711 | 0.0000 | No |
| 21818 | Gm23712 | 0.0000 | No |
| 21819 | Gm23713 | 0.0000 | No |
| 21820 | Gm23714 | 0.0000 | No |
| 21821 | Gm23715 | 0.0000 | No |
| 21822 | Gm23716 | 0.0000 | No |
| 21823 | Gm23722 | 0.0000 | No |
| 21824 | Gm23723 | 0.0000 | No |
| 21825 | Gm23725 | 0.0000 | No |
| 21826 | Gm23726 | 0.0000 | No |
| 21827 | Gm23727 | 0.0000 | No |
| 21828 | Gm23730 | 0.0000 | No |
| 21829 | Gm23731 | 0.0000 | No |
| 21830 | Gm23732 | 0.0000 | No |
| 21831 | Gm23733 | 0.0000 | No |
| 21832 | Gm23735 | 0.0000 | No |
| 21833 | Gm23736 | 0.0000 | No |
| 21834 | Gm23737 | 0.0000 | No |
| 21835 | Gm23738 | 0.0000 | No |
| 21836 | Gm23739 | 0.0000 | No |
| 21837 | Gm23741 | 0.0000 | No |
| 21838 | Gm23743 | 0.0000 | No |
| 21839 | Gm23744 | 0.0000 | No |
| 21840 | Gm23745 | 0.0000 | No |
| 21841 | Gm23746 | 0.0000 | No |
| 21842 | Gm23747 | 0.0000 | No |
| 21843 | Gm23748 | 0.0000 | No |
| 21844 | Gm23749 | 0.0000 | No |
| 21845 | Gm23750 | 0.0000 | No |
| 21846 | Gm23751 | 0.0000 | No |
| 21847 | Gm23753 | 0.0000 | No |

|       |         |        |    |
|-------|---------|--------|----|
| 21848 | Gm23754 | 0.0000 | No |
| 21849 | Gm23755 | 0.0000 | No |
| 21850 | Gm23758 | 0.0000 | No |
| 21851 | Gm23759 | 0.0000 | No |
| 21852 | Gm23761 | 0.0000 | No |
| 21853 | Gm23762 | 0.0000 | No |
| 21854 | Gm23763 | 0.0000 | No |
| 21855 | Gm23765 | 0.0000 | No |
| 21856 | Gm23766 | 0.0000 | No |
| 21857 | Gm23767 | 0.0000 | No |
| 21858 | Gm23768 | 0.0000 | No |
| 21859 | Gm23769 | 0.0000 | No |
| 21860 | Gm23771 | 0.0000 | No |
| 21861 | Gm23772 | 0.0000 | No |
| 21862 | Gm23773 | 0.0000 | No |
| 21863 | Gm23774 | 0.0000 | No |
| 21864 | Gm23775 | 0.0000 | No |
| 21865 | Gm23776 | 0.0000 | No |
| 21866 | Gm23779 | 0.0000 | No |
| 21867 | Gm23781 | 0.0000 | No |
| 21868 | Gm23783 | 0.0000 | No |
| 21869 | Gm23785 | 0.0000 | No |
| 21870 | Gm23786 | 0.0000 | No |
| 21871 | Gm23787 | 0.0000 | No |
| 21872 | Gm23788 | 0.0000 | No |
| 21873 | Gm23789 | 0.0000 | No |
| 21874 | Gm23790 | 0.0000 | No |
| 21875 | Gm23792 | 0.0000 | No |
| 21876 | Gm23794 | 0.0000 | No |
| 21877 | Gm23795 | 0.0000 | No |
| 21878 | Gm23798 | 0.0000 | No |
| 21879 | Gm23800 | 0.0000 | No |
| 21880 | Gm23801 | 0.0000 | No |
| 21881 | Gm23802 | 0.0000 | No |
| 21882 | Gm23803 | 0.0000 | No |
| 21883 | Gm23804 | 0.0000 | No |
| 21884 | Gm2381  | 0.0000 | No |
| 21885 | Gm23810 | 0.0000 | No |
| 21886 | Gm23811 | 0.0000 | No |
| 21887 | Gm23812 | 0.0000 | No |
| 21888 | Gm23813 | 0.0000 | No |
| 21889 | Gm23814 | 0.0000 | No |
| 21890 | Gm23815 | 0.0000 | No |
| 21891 | Gm23816 | 0.0000 | No |
| 21892 | Gm23817 | 0.0000 | No |
| 21893 | Gm23819 | 0.0000 | No |

|       |         |        |    |
|-------|---------|--------|----|
| 21894 | Gm23820 | 0.0000 | No |
| 21895 | Gm23822 | 0.0000 | No |
| 21896 | Gm23823 | 0.0000 | No |
| 21897 | Gm23824 | 0.0000 | No |
| 21898 | Gm23826 | 0.0000 | No |
| 21899 | Gm23827 | 0.0000 | No |
| 21900 | Gm23829 | 0.0000 | No |
| 21901 | Gm2383  | 0.0000 | No |
| 21902 | Gm23830 | 0.0000 | No |
| 21903 | Gm23831 | 0.0000 | No |
| 21904 | Gm23833 | 0.0000 | No |
| 21905 | Gm23835 | 0.0000 | No |
| 21906 | Gm23836 | 0.0000 | No |
| 21907 | Gm23837 | 0.0000 | No |
| 21908 | Gm23838 | 0.0000 | No |
| 21909 | Gm23839 | 0.0000 | No |
| 21910 | Gm23840 | 0.0000 | No |
| 21911 | Gm23841 | 0.0000 | No |
| 21912 | Gm23844 | 0.0000 | No |
| 21913 | Gm23845 | 0.0000 | No |
| 21914 | Gm23846 | 0.0000 | No |
| 21915 | Gm23847 | 0.0000 | No |
| 21916 | Gm23849 | 0.0000 | No |
| 21917 | Gm23850 | 0.0000 | No |
| 21918 | Gm23851 | 0.0000 | No |
| 21919 | Gm23852 | 0.0000 | No |
| 21920 | Gm23854 | 0.0000 | No |
| 21921 | Gm23855 | 0.0000 | No |
| 21922 | Gm23856 | 0.0000 | No |
| 21923 | Gm23858 | 0.0000 | No |
| 21924 | Gm23859 | 0.0000 | No |
| 21925 | Gm23860 | 0.0000 | No |
| 21926 | Gm23862 | 0.0000 | No |
| 21927 | Gm23865 | 0.0000 | No |
| 21928 | Gm23867 | 0.0000 | No |
| 21929 | Gm23872 | 0.0000 | No |
| 21930 | Gm23873 | 0.0000 | No |
| 21931 | Gm23875 | 0.0000 | No |
| 21932 | Gm23876 | 0.0000 | No |
| 21933 | Gm23877 | 0.0000 | No |
| 21934 | Gm23879 | 0.0000 | No |
| 21935 | Gm23880 | 0.0000 | No |
| 21936 | Gm23881 | 0.0000 | No |
| 21937 | Gm23883 | 0.0000 | No |
| 21938 | Gm23884 | 0.0000 | No |
| 21939 | Gm23885 | 0.0000 | No |

|       |         |        |    |
|-------|---------|--------|----|
| 21940 | Gm23886 | 0.0000 | No |
| 21941 | Gm23887 | 0.0000 | No |
| 21942 | Gm23888 | 0.0000 | No |
| 21943 | Gm23889 | 0.0000 | No |
| 21944 | Gm2389  | 0.0000 | No |
| 21945 | Gm23891 | 0.0000 | No |
| 21946 | Gm23893 | 0.0000 | No |
| 21947 | Gm23894 | 0.0000 | No |
| 21948 | Gm23895 | 0.0000 | No |
| 21949 | Gm23897 | 0.0000 | No |
| 21950 | Gm23898 | 0.0000 | No |
| 21951 | Gm23901 | 0.0000 | No |
| 21952 | Gm23902 | 0.0000 | No |
| 21953 | Gm23904 | 0.0000 | No |
| 21954 | Gm23906 | 0.0000 | No |
| 21955 | Gm23907 | 0.0000 | No |
| 21956 | Gm23909 | 0.0000 | No |
| 21957 | Gm23911 | 0.0000 | No |
| 21958 | Gm23912 | 0.0000 | No |
| 21959 | Gm23916 | 0.0000 | No |
| 21960 | Gm23917 | 0.0000 | No |
| 21961 | Gm23921 | 0.0000 | No |
| 21962 | Gm23922 | 0.0000 | No |
| 21963 | Gm23923 | 0.0000 | No |
| 21964 | Gm23924 | 0.0000 | No |
| 21965 | Gm23925 | 0.0000 | No |
| 21966 | Gm23926 | 0.0000 | No |
| 21967 | Gm23927 | 0.0000 | No |
| 21968 | Gm23928 | 0.0000 | No |
| 21969 | Gm23931 | 0.0000 | No |
| 21970 | Gm23932 | 0.0000 | No |
| 21971 | Gm23933 | 0.0000 | No |
| 21972 | Gm23934 | 0.0000 | No |
| 21973 | Gm23935 | 0.0000 | No |
| 21974 | Gm23936 | 0.0000 | No |
| 21975 | Gm23939 | 0.0000 | No |
| 21976 | Gm23940 | 0.0000 | No |
| 21977 | Gm23941 | 0.0000 | No |
| 21978 | Gm23942 | 0.0000 | No |
| 21979 | Gm23943 | 0.0000 | No |
| 21980 | Gm23944 | 0.0000 | No |
| 21981 | Gm23945 | 0.0000 | No |
| 21982 | Gm23946 | 0.0000 | No |
| 21983 | Gm23948 | 0.0000 | No |
| 21984 | Gm23949 | 0.0000 | No |
| 21985 | Gm23950 | 0.0000 | No |

|       |         |        |    |
|-------|---------|--------|----|
| 21986 | Gm23951 | 0.0000 | No |
| 21987 | Gm23952 | 0.0000 | No |
| 21988 | Gm23953 | 0.0000 | No |
| 21989 | Gm23954 | 0.0000 | No |
| 21990 | Gm23955 | 0.0000 | No |
| 21991 | Gm23958 | 0.0000 | No |
| 21992 | Gm23959 | 0.0000 | No |
| 21993 | Gm2396  | 0.0000 | No |
| 21994 | Gm23960 | 0.0000 | No |
| 21995 | Gm23961 | 0.0000 | No |
| 21996 | Gm23963 | 0.0000 | No |
| 21997 | Gm23965 | 0.0000 | No |
| 21998 | Gm23966 | 0.0000 | No |
| 21999 | Gm23968 | 0.0000 | No |
| 22000 | Gm23969 | 0.0000 | No |
| 22001 | Gm23970 | 0.0000 | No |
| 22002 | Gm23971 | 0.0000 | No |
| 22003 | Gm23972 | 0.0000 | No |
| 22004 | Gm23974 | 0.0000 | No |
| 22005 | Gm23975 | 0.0000 | No |
| 22006 | Gm23976 | 0.0000 | No |
| 22007 | Gm23977 | 0.0000 | No |
| 22008 | Gm23979 | 0.0000 | No |
| 22009 | Gm23980 | 0.0000 | No |
| 22010 | Gm23981 | 0.0000 | No |
| 22011 | Gm23982 | 0.0000 | No |
| 22012 | Gm23984 | 0.0000 | No |
| 22013 | Gm23985 | 0.0000 | No |
| 22014 | Gm23986 | 0.0000 | No |
| 22015 | Gm23987 | 0.0000 | No |
| 22016 | Gm23988 | 0.0000 | No |
| 22017 | Gm2399  | 0.0000 | No |
| 22018 | Gm23990 | 0.0000 | No |
| 22019 | Gm23991 | 0.0000 | No |
| 22020 | Gm23992 | 0.0000 | No |
| 22021 | Gm23993 | 0.0000 | No |
| 22022 | Gm23995 | 0.0000 | No |
| 22023 | Gm23996 | 0.0000 | No |
| 22024 | Gm24000 | 0.0000 | No |
| 22025 | Gm24001 | 0.0000 | No |
| 22026 | Gm24002 | 0.0000 | No |
| 22027 | Gm24003 | 0.0000 | No |
| 22028 | Gm24004 | 0.0000 | No |
| 22029 | Gm24005 | 0.0000 | No |
| 22030 | Gm24008 | 0.0000 | No |
| 22031 | Gm24010 | 0.0000 | No |

|       |         |        |    |
|-------|---------|--------|----|
| 22032 | Gm24013 | 0.0000 | No |
| 22033 | Gm24015 | 0.0000 | No |
| 22034 | Gm24016 | 0.0000 | No |
| 22035 | Gm24017 | 0.0000 | No |
| 22036 | Gm24019 | 0.0000 | No |
| 22037 | Gm24020 | 0.0000 | No |
| 22038 | Gm24021 | 0.0000 | No |
| 22039 | Gm24022 | 0.0000 | No |
| 22040 | Gm24025 | 0.0000 | No |
| 22041 | Gm24026 | 0.0000 | No |
| 22042 | Gm24027 | 0.0000 | No |
| 22043 | Gm24028 | 0.0000 | No |
| 22044 | Gm24029 | 0.0000 | No |
| 22045 | Gm24030 | 0.0000 | No |
| 22046 | Gm24031 | 0.0000 | No |
| 22047 | Gm24032 | 0.0000 | No |
| 22048 | Gm24035 | 0.0000 | No |
| 22049 | Gm24036 | 0.0000 | No |
| 22050 | Gm24037 | 0.0000 | No |
| 22051 | Gm24038 | 0.0000 | No |
| 22052 | Gm24039 | 0.0000 | No |
| 22053 | Gm2404  | 0.0000 | No |
| 22054 | Gm24040 | 0.0000 | No |
| 22055 | Gm24041 | 0.0000 | No |
| 22056 | Gm24043 | 0.0000 | No |
| 22057 | Gm24044 | 0.0000 | No |
| 22058 | Gm24045 | 0.0000 | No |
| 22059 | Gm24046 | 0.0000 | No |
| 22060 | Gm24047 | 0.0000 | No |
| 22061 | Gm24048 | 0.0000 | No |
| 22062 | Gm24049 | 0.0000 | No |
| 22063 | Gm24050 | 0.0000 | No |
| 22064 | Gm24051 | 0.0000 | No |
| 22065 | Gm24053 | 0.0000 | No |
| 22066 | Gm24054 | 0.0000 | No |
| 22067 | Gm24056 | 0.0000 | No |
| 22068 | Gm24057 | 0.0000 | No |
| 22069 | Gm24059 | 0.0000 | No |
| 22070 | Gm24061 | 0.0000 | No |
| 22071 | Gm24062 | 0.0000 | No |
| 22072 | Gm24063 | 0.0000 | No |
| 22073 | Gm24064 | 0.0000 | No |
| 22074 | Gm24065 | 0.0000 | No |
| 22075 | Gm24066 | 0.0000 | No |
| 22076 | Gm24067 | 0.0000 | No |
| 22077 | Gm24068 | 0.0000 | No |



|       |         |        |    |
|-------|---------|--------|----|
| 22078 | Gm24069 | 0.0000 | No |
| 22079 | Gm24070 | 0.0000 | No |
| 22080 | Gm24071 | 0.0000 | No |
| 22081 | Gm24072 | 0.0000 | No |
| 22082 | Gm24073 | 0.0000 | No |
| 22083 | Gm24074 | 0.0000 | No |
| 22084 | Gm24075 | 0.0000 | No |
| 22085 | Gm24077 | 0.0000 | No |
| 22086 | Gm24078 | 0.0000 | No |
| 22087 | Gm24079 | 0.0000 | No |
| 22088 | Gm24080 | 0.0000 | No |
| 22089 | Gm24082 | 0.0000 | No |
| 22090 | Gm24083 | 0.0000 | No |
| 22091 | Gm24084 | 0.0000 | No |
| 22092 | Gm24085 | 0.0000 | No |
| 22093 | Gm24086 | 0.0000 | No |
| 22094 | Gm24088 | 0.0000 | No |
| 22095 | Gm24091 | 0.0000 | No |
| 22096 | Gm24092 | 0.0000 | No |
| 22097 | Gm24095 | 0.0000 | No |
| 22098 | Gm24096 | 0.0000 | No |
| 22099 | Gm24097 | 0.0000 | No |
| 22100 | Gm24099 | 0.0000 | No |
| 22101 | Gm24100 | 0.0000 | No |
| 22102 | Gm24103 | 0.0000 | No |
| 22103 | Gm24105 | 0.0000 | No |
| 22104 | Gm24106 | 0.0000 | No |
| 22105 | Gm24108 | 0.0000 | No |
| 22106 | Gm24109 | 0.0000 | No |
| 22107 | Gm24111 | 0.0000 | No |
| 22108 | Gm24112 | 0.0000 | No |
| 22109 | Gm24113 | 0.0000 | No |
| 22110 | Gm24115 | 0.0000 | No |
| 22111 | Gm24116 | 0.0000 | No |
| 22112 | Gm24117 | 0.0000 | No |
| 22113 | Gm24118 | 0.0000 | No |
| 22114 | Gm24119 | 0.0000 | No |
| 22115 | Gm24120 | 0.0000 | No |
| 22116 | Gm24121 | 0.0000 | No |
| 22117 | Gm24122 | 0.0000 | No |
| 22118 | Gm24123 | 0.0000 | No |
| 22119 | Gm24124 | 0.0000 | No |
| 22120 | Gm24125 | 0.0000 | No |
| 22121 | Gm24126 | 0.0000 | No |
| 22122 | Gm24127 | 0.0000 | No |
| 22123 | Gm24128 | 0.0000 | No |

|       |         |        |    |
|-------|---------|--------|----|
| 22124 | Gm24129 | 0.0000 | No |
| 22125 | Gm24130 | 0.0000 | No |
| 22126 | Gm24132 | 0.0000 | No |
| 22127 | Gm24133 | 0.0000 | No |
| 22128 | Gm24134 | 0.0000 | No |
| 22129 | Gm24135 | 0.0000 | No |
| 22130 | Gm24136 | 0.0000 | No |
| 22131 | Gm24137 | 0.0000 | No |
| 22132 | Gm24138 | 0.0000 | No |
| 22133 | Gm24139 | 0.0000 | No |
| 22134 | Gm24140 | 0.0000 | No |
| 22135 | Gm24141 | 0.0000 | No |
| 22136 | Gm24142 | 0.0000 | No |
| 22137 | Gm24144 | 0.0000 | No |
| 22138 | Gm24145 | 0.0000 | No |
| 22139 | Gm24146 | 0.0000 | No |
| 22140 | Gm24147 | 0.0000 | No |
| 22141 | Gm24148 | 0.0000 | No |
| 22142 | Gm24149 | 0.0000 | No |
| 22143 | Gm2415  | 0.0000 | No |
| 22144 | Gm24150 | 0.0000 | No |
| 22145 | Gm24151 | 0.0000 | No |
| 22146 | Gm24152 | 0.0000 | No |
| 22147 | Gm24153 | 0.0000 | No |
| 22148 | Gm24154 | 0.0000 | No |
| 22149 | Gm24155 | 0.0000 | No |
| 22150 | Gm24157 | 0.0000 | No |
| 22151 | Gm24158 | 0.0000 | No |
| 22152 | Gm24159 | 0.0000 | No |
| 22153 | Gm24160 | 0.0000 | No |
| 22154 | Gm24161 | 0.0000 | No |
| 22155 | Gm24162 | 0.0000 | No |
| 22156 | Gm24163 | 0.0000 | No |
| 22157 | Gm24164 | 0.0000 | No |
| 22158 | Gm24165 | 0.0000 | No |
| 22159 | Gm24166 | 0.0000 | No |
| 22160 | Gm24167 | 0.0000 | No |
| 22161 | Gm24168 | 0.0000 | No |
| 22162 | Gm24169 | 0.0000 | No |
| 22163 | Gm24170 | 0.0000 | No |
| 22164 | Gm24171 | 0.0000 | No |
| 22165 | Gm24172 | 0.0000 | No |
| 22166 | Gm24173 | 0.0000 | No |
| 22167 | Gm24175 | 0.0000 | No |
| 22168 | Gm24176 | 0.0000 | No |
| 22169 | Gm24177 | 0.0000 | No |

|       |         |        |    |
|-------|---------|--------|----|
| 22170 | Gm24179 | 0.0000 | No |
| 22171 | Gm24180 | 0.0000 | No |
| 22172 | Gm24182 | 0.0000 | No |
| 22173 | Gm24184 | 0.0000 | No |
| 22174 | Gm24187 | 0.0000 | No |
| 22175 | Gm24190 | 0.0000 | No |
| 22176 | Gm24191 | 0.0000 | No |
| 22177 | Gm24192 | 0.0000 | No |
| 22178 | Gm24193 | 0.0000 | No |
| 22179 | Gm24194 | 0.0000 | No |
| 22180 | Gm24195 | 0.0000 | No |
| 22181 | Gm24196 | 0.0000 | No |
| 22182 | Gm24197 | 0.0000 | No |
| 22183 | Gm2420  | 0.0000 | No |
| 22184 | Gm24200 | 0.0000 | No |
| 22185 | Gm24201 | 0.0000 | No |
| 22186 | Gm24202 | 0.0000 | No |
| 22187 | Gm24203 | 0.0000 | No |
| 22188 | Gm24204 | 0.0000 | No |
| 22189 | Gm24205 | 0.0000 | No |
| 22190 | Gm24206 | 0.0000 | No |
| 22191 | Gm24207 | 0.0000 | No |
| 22192 | Gm24208 | 0.0000 | No |
| 22193 | Gm24210 | 0.0000 | No |
| 22194 | Gm24211 | 0.0000 | No |
| 22195 | Gm24212 | 0.0000 | No |
| 22196 | Gm24213 | 0.0000 | No |
| 22197 | Gm24216 | 0.0000 | No |
| 22198 | Gm24218 | 0.0000 | No |
| 22199 | Gm24219 | 0.0000 | No |
| 22200 | Gm24220 | 0.0000 | No |
| 22201 | Gm24223 | 0.0000 | No |
| 22202 | Gm24224 | 0.0000 | No |
| 22203 | Gm24225 | 0.0000 | No |
| 22204 | Gm24226 | 0.0000 | No |
| 22205 | Gm24228 | 0.0000 | No |
| 22206 | Gm24229 | 0.0000 | No |
| 22207 | Gm2423  | 0.0000 | No |
| 22208 | Gm24230 | 0.0000 | No |
| 22209 | Gm24231 | 0.0000 | No |
| 22210 | Gm24232 | 0.0000 | No |
| 22211 | Gm24233 | 0.0000 | No |
| 22212 | Gm24234 | 0.0000 | No |
| 22213 | Gm24235 | 0.0000 | No |
| 22214 | Gm24236 | 0.0000 | No |
| 22215 | Gm24237 | 0.0000 | No |

|       |         |        |    |
|-------|---------|--------|----|
| 22216 | Gm24239 | 0.0000 | No |
| 22217 | Gm24240 | 0.0000 | No |
| 22218 | Gm24241 | 0.0000 | No |
| 22219 | Gm24242 | 0.0000 | No |
| 22220 | Gm24244 | 0.0000 | No |
| 22221 | Gm24245 | 0.0000 | No |
| 22222 | Gm24246 | 0.0000 | No |
| 22223 | Gm24248 | 0.0000 | No |
| 22224 | Gm24249 | 0.0000 | No |
| 22225 | Gm24251 | 0.0000 | No |
| 22226 | Gm24252 | 0.0000 | No |
| 22227 | Gm24253 | 0.0000 | No |
| 22228 | Gm24254 | 0.0000 | No |
| 22229 | Gm24255 | 0.0000 | No |
| 22230 | Gm24256 | 0.0000 | No |
| 22231 | Gm24257 | 0.0000 | No |
| 22232 | Gm24258 | 0.0000 | No |
| 22233 | Gm24259 | 0.0000 | No |
| 22234 | Gm24261 | 0.0000 | No |
| 22235 | Gm24262 | 0.0000 | No |
| 22236 | Gm24263 | 0.0000 | No |
| 22237 | Gm24264 | 0.0000 | No |
| 22238 | Gm24265 | 0.0000 | No |
| 22239 | Gm24267 | 0.0000 | No |
| 22240 | Gm24268 | 0.0000 | No |
| 22241 | Gm24269 | 0.0000 | No |
| 22242 | Gm2427  | 0.0000 | No |
| 22243 | Gm24270 | 0.0000 | No |
| 22244 | Gm24272 | 0.0000 | No |
| 22245 | Gm24273 | 0.0000 | No |
| 22246 | Gm24274 | 0.0000 | No |
| 22247 | Gm24275 | 0.0000 | No |
| 22248 | Gm24276 | 0.0000 | No |
| 22249 | Gm24277 | 0.0000 | No |
| 22250 | Gm24278 | 0.0000 | No |
| 22251 | Gm24279 | 0.0000 | No |
| 22252 | Gm24282 | 0.0000 | No |
| 22253 | Gm24283 | 0.0000 | No |
| 22254 | Gm24284 | 0.0000 | No |
| 22255 | Gm24285 | 0.0000 | No |
| 22256 | Gm24286 | 0.0000 | No |
| 22257 | Gm2429  | 0.0000 | No |
| 22258 | Gm24290 | 0.0000 | No |
| 22259 | Gm24291 | 0.0000 | No |
| 22260 | Gm24292 | 0.0000 | No |
| 22261 | Gm24294 | 0.0000 | No |

|       |         |        |    |
|-------|---------|--------|----|
| 22262 | Gm24296 | 0.0000 | No |
| 22263 | Gm24297 | 0.0000 | No |
| 22264 | Gm24298 | 0.0000 | No |
| 22265 | Gm24299 | 0.0000 | No |
| 22266 | Gm24300 | 0.0000 | No |
| 22267 | Gm24302 | 0.0000 | No |
| 22268 | Gm24303 | 0.0000 | No |
| 22269 | Gm24304 | 0.0000 | No |
| 22270 | Gm24305 | 0.0000 | No |
| 22271 | Gm24306 | 0.0000 | No |
| 22272 | Gm24307 | 0.0000 | No |
| 22273 | Gm24308 | 0.0000 | No |
| 22274 | Gm2431  | 0.0000 | No |
| 22275 | Gm24310 | 0.0000 | No |
| 22276 | Gm24311 | 0.0000 | No |
| 22277 | Gm24314 | 0.0000 | No |
| 22278 | Gm24315 | 0.0000 | No |
| 22279 | Gm24316 | 0.0000 | No |
| 22280 | Gm24317 | 0.0000 | No |
| 22281 | Gm24318 | 0.0000 | No |
| 22282 | Gm24319 | 0.0000 | No |
| 22283 | Gm24321 | 0.0000 | No |
| 22284 | Gm24322 | 0.0000 | No |
| 22285 | Gm24323 | 0.0000 | No |
| 22286 | Gm24325 | 0.0000 | No |
| 22287 | Gm24326 | 0.0000 | No |
| 22288 | Gm24327 | 0.0000 | No |
| 22289 | Gm24328 | 0.0000 | No |
| 22290 | Gm24331 | 0.0000 | No |
| 22291 | Gm24332 | 0.0000 | No |
| 22292 | Gm24333 | 0.0000 | No |
| 22293 | Gm24334 | 0.0000 | No |
| 22294 | Gm24335 | 0.0000 | No |
| 22295 | Gm24336 | 0.0000 | No |
| 22296 | Gm24337 | 0.0000 | No |
| 22297 | Gm24340 | 0.0000 | No |
| 22298 | Gm24343 | 0.0000 | No |
| 22299 | Gm24345 | 0.0000 | No |
| 22300 | Gm24346 | 0.0000 | No |
| 22301 | Gm24347 | 0.0000 | No |
| 22302 | Gm24348 | 0.0000 | No |
| 22303 | Gm24349 | 0.0000 | No |
| 22304 | Gm24350 | 0.0000 | No |
| 22305 | Gm24352 | 0.0000 | No |
| 22306 | Gm24355 | 0.0000 | No |
| 22307 | Gm24356 | 0.0000 | No |

|       |         |        |    |
|-------|---------|--------|----|
| 22308 | Gm24357 | 0.0000 | No |
| 22309 | Gm24358 | 0.0000 | No |
| 22310 | Gm24359 | 0.0000 | No |
| 22311 | Gm24362 | 0.0000 | No |
| 22312 | Gm24363 | 0.0000 | No |
| 22313 | Gm24365 | 0.0000 | No |
| 22314 | Gm24366 | 0.0000 | No |
| 22315 | Gm24368 | 0.0000 | No |
| 22316 | Gm24369 | 0.0000 | No |
| 22317 | Gm24370 | 0.0000 | No |
| 22318 | Gm24371 | 0.0000 | No |
| 22319 | Gm24372 | 0.0000 | No |
| 22320 | Gm24373 | 0.0000 | No |
| 22321 | Gm24374 | 0.0000 | No |
| 22322 | Gm24375 | 0.0000 | No |
| 22323 | Gm24376 | 0.0000 | No |
| 22324 | Gm24377 | 0.0000 | No |
| 22325 | Gm24378 | 0.0000 | No |
| 22326 | Gm24379 | 0.0000 | No |
| 22327 | Gm24380 | 0.0000 | No |
| 22328 | Gm24381 | 0.0000 | No |
| 22329 | Gm24382 | 0.0000 | No |
| 22330 | Gm24383 | 0.0000 | No |
| 22331 | Gm24387 | 0.0000 | No |
| 22332 | Gm24388 | 0.0000 | No |
| 22333 | Gm24389 | 0.0000 | No |
| 22334 | Gm24390 | 0.0000 | No |
| 22335 | Gm24391 | 0.0000 | No |
| 22336 | Gm24392 | 0.0000 | No |
| 22337 | Gm24393 | 0.0000 | No |
| 22338 | Gm24394 | 0.0000 | No |
| 22339 | Gm24395 | 0.0000 | No |
| 22340 | Gm24396 | 0.0000 | No |
| 22341 | Gm24398 | 0.0000 | No |
| 22342 | Gm24400 | 0.0000 | No |
| 22343 | Gm24401 | 0.0000 | No |
| 22344 | Gm24402 | 0.0000 | No |
| 22345 | Gm24403 | 0.0000 | No |
| 22346 | Gm24405 | 0.0000 | No |
| 22347 | Gm24406 | 0.0000 | No |
| 22348 | Gm24409 | 0.0000 | No |
| 22349 | Gm24410 | 0.0000 | No |
| 22350 | Gm24411 | 0.0000 | No |
| 22351 | Gm24412 | 0.0000 | No |
| 22352 | Gm24414 | 0.0000 | No |
| 22353 | Gm24416 | 0.0000 | No |

|       |         |        |    |
|-------|---------|--------|----|
| 22354 | Gm24417 | 0.0000 | No |
| 22355 | Gm24418 | 0.0000 | No |
| 22356 | Gm24419 | 0.0000 | No |
| 22357 | Gm24420 | 0.0000 | No |
| 22358 | Gm24422 | 0.0000 | No |
| 22359 | Gm24423 | 0.0000 | No |
| 22360 | Gm24424 | 0.0000 | No |
| 22361 | Gm24427 | 0.0000 | No |
| 22362 | Gm24430 | 0.0000 | No |
| 22363 | Gm24431 | 0.0000 | No |
| 22364 | Gm24432 | 0.0000 | No |
| 22365 | Gm24433 | 0.0000 | No |
| 22366 | Gm24434 | 0.0000 | No |
| 22367 | Gm24435 | 0.0000 | No |
| 22368 | Gm24436 | 0.0000 | No |
| 22369 | Gm24437 | 0.0000 | No |
| 22370 | Gm24439 | 0.0000 | No |
| 22371 | Gm24440 | 0.0000 | No |
| 22372 | Gm24441 | 0.0000 | No |
| 22373 | Gm24443 | 0.0000 | No |
| 22374 | Gm24444 | 0.0000 | No |
| 22375 | Gm24445 | 0.0000 | No |
| 22376 | Gm24446 | 0.0000 | No |
| 22377 | Gm24447 | 0.0000 | No |
| 22378 | Gm2445  | 0.0000 | No |
| 22379 | Gm24451 | 0.0000 | No |
| 22380 | Gm24452 | 0.0000 | No |
| 22381 | Gm24453 | 0.0000 | No |
| 22382 | Gm24455 | 0.0000 | No |
| 22383 | Gm24456 | 0.0000 | No |
| 22384 | Gm24458 | 0.0000 | No |
| 22385 | Gm24459 | 0.0000 | No |
| 22386 | Gm24460 | 0.0000 | No |
| 22387 | Gm24461 | 0.0000 | No |
| 22388 | Gm24462 | 0.0000 | No |
| 22389 | Gm24463 | 0.0000 | No |
| 22390 | Gm24464 | 0.0000 | No |
| 22391 | Gm24465 | 0.0000 | No |
| 22392 | Gm24466 | 0.0000 | No |
| 22393 | Gm24468 | 0.0000 | No |
| 22394 | Gm24469 | 0.0000 | No |
| 22395 | Gm2447  | 0.0000 | No |
| 22396 | Gm24470 | 0.0000 | No |
| 22397 | Gm24471 | 0.0000 | No |
| 22398 | Gm24472 | 0.0000 | No |
| 22399 | Gm24473 | 0.0000 | No |

|       |         |        |    |
|-------|---------|--------|----|
| 22400 | Gm24474 | 0.0000 | No |
| 22401 | Gm24477 | 0.0000 | No |
| 22402 | Gm24478 | 0.0000 | No |
| 22403 | Gm2448  | 0.0000 | No |
| 22404 | Gm24481 | 0.0000 | No |
| 22405 | Gm24482 | 0.0000 | No |
| 22406 | Gm24485 | 0.0000 | No |
| 22407 | Gm24486 | 0.0000 | No |
| 22408 | Gm24487 | 0.0000 | No |
| 22409 | Gm24488 | 0.0000 | No |
| 22410 | Gm2449  | 0.0000 | No |
| 22411 | Gm24490 | 0.0000 | No |
| 22412 | Gm24491 | 0.0000 | No |
| 22413 | Gm24492 | 0.0000 | No |
| 22414 | Gm24493 | 0.0000 | No |
| 22415 | Gm24494 | 0.0000 | No |
| 22416 | Gm24495 | 0.0000 | No |
| 22417 | Gm24496 | 0.0000 | No |
| 22418 | Gm24497 | 0.0000 | No |
| 22419 | Gm24498 | 0.0000 | No |
| 22420 | Gm24499 | 0.0000 | No |
| 22421 | Gm24500 | 0.0000 | No |
| 22422 | Gm24501 | 0.0000 | No |
| 22423 | Gm24502 | 0.0000 | No |
| 22424 | Gm24505 | 0.0000 | No |
| 22425 | Gm24507 | 0.0000 | No |
| 22426 | Gm24508 | 0.0000 | No |
| 22427 | Gm2451  | 0.0000 | No |
| 22428 | Gm24510 | 0.0000 | No |
| 22429 | Gm24512 | 0.0000 | No |
| 22430 | Gm24513 | 0.0000 | No |
| 22431 | Gm24514 | 0.0000 | No |
| 22432 | Gm24517 | 0.0000 | No |
| 22433 | Gm24518 | 0.0000 | No |
| 22434 | Gm24520 | 0.0000 | No |
| 22435 | Gm24521 | 0.0000 | No |
| 22436 | Gm24522 | 0.0000 | No |
| 22437 | Gm24523 | 0.0000 | No |
| 22438 | Gm24524 | 0.0000 | No |
| 22439 | Gm24525 | 0.0000 | No |
| 22440 | Gm24526 | 0.0000 | No |
| 22441 | Gm24528 | 0.0000 | No |
| 22442 | Gm2453  | 0.0000 | No |
| 22443 | Gm24530 | 0.0000 | No |
| 22444 | Gm24531 | 0.0000 | No |
| 22445 | Gm24532 | 0.0000 | No |



|       |         |        |    |
|-------|---------|--------|----|
| 22446 | Gm24533 | 0.0000 | No |
| 22447 | Gm24534 | 0.0000 | No |
| 22448 | Gm24535 | 0.0000 | No |
| 22449 | Gm24536 | 0.0000 | No |
| 22450 | Gm24537 | 0.0000 | No |
| 22451 | Gm24538 | 0.0000 | No |
| 22452 | Gm24539 | 0.0000 | No |
| 22453 | Gm24540 | 0.0000 | No |
| 22454 | Gm24541 | 0.0000 | No |
| 22455 | Gm24542 | 0.0000 | No |
| 22456 | Gm24543 | 0.0000 | No |
| 22457 | Gm24544 | 0.0000 | No |
| 22458 | Gm24546 | 0.0000 | No |
| 22459 | Gm24547 | 0.0000 | No |
| 22460 | Gm24548 | 0.0000 | No |
| 22461 | Gm24549 | 0.0000 | No |
| 22462 | Gm24550 | 0.0000 | No |
| 22463 | Gm24551 | 0.0000 | No |
| 22464 | Gm24552 | 0.0000 | No |
| 22465 | Gm24553 | 0.0000 | No |
| 22466 | Gm24554 | 0.0000 | No |
| 22467 | Gm24556 | 0.0000 | No |
| 22468 | Gm24557 | 0.0000 | No |
| 22469 | Gm24559 | 0.0000 | No |
| 22470 | Gm24561 | 0.0000 | No |
| 22471 | Gm24563 | 0.0000 | No |
| 22472 | Gm24564 | 0.0000 | No |
| 22473 | Gm24565 | 0.0000 | No |
| 22474 | Gm24566 | 0.0000 | No |
| 22475 | Gm24567 | 0.0000 | No |
| 22476 | Gm24568 | 0.0000 | No |
| 22477 | Gm24569 | 0.0000 | No |
| 22478 | Gm24570 | 0.0000 | No |
| 22479 | Gm24572 | 0.0000 | No |
| 22480 | Gm24574 | 0.0000 | No |
| 22481 | Gm24575 | 0.0000 | No |
| 22482 | Gm24576 | 0.0000 | No |
| 22483 | Gm24577 | 0.0000 | No |
| 22484 | Gm24578 | 0.0000 | No |
| 22485 | Gm24579 | 0.0000 | No |
| 22486 | Gm24581 | 0.0000 | No |
| 22487 | Gm24582 | 0.0000 | No |
| 22488 | Gm24584 | 0.0000 | No |
| 22489 | Gm24585 | 0.0000 | No |
| 22490 | Gm24586 | 0.0000 | No |
| 22491 | Gm24587 | 0.0000 | No |

|       |         |        |    |
|-------|---------|--------|----|
| 22492 | Gm24588 | 0.0000 | No |
| 22493 | Gm24589 | 0.0000 | No |
| 22494 | Gm24590 | 0.0000 | No |
| 22495 | Gm24591 | 0.0000 | No |
| 22496 | Gm24592 | 0.0000 | No |
| 22497 | Gm24594 | 0.0000 | No |
| 22498 | Gm24595 | 0.0000 | No |
| 22499 | Gm24596 | 0.0000 | No |
| 22500 | Gm24597 | 0.0000 | No |
| 22501 | Gm24598 | 0.0000 | No |
| 22502 | Gm24599 | 0.0000 | No |
| 22503 | Gm24602 | 0.0000 | No |
| 22504 | Gm24605 | 0.0000 | No |
| 22505 | Gm24607 | 0.0000 | No |
| 22506 | Gm24608 | 0.0000 | No |
| 22507 | Gm24609 | 0.0000 | No |
| 22508 | Gm24611 | 0.0000 | No |
| 22509 | Gm24612 | 0.0000 | No |
| 22510 | Gm24613 | 0.0000 | No |
| 22511 | Gm24614 | 0.0000 | No |
| 22512 | Gm24615 | 0.0000 | No |
| 22513 | Gm24616 | 0.0000 | No |
| 22514 | Gm24617 | 0.0000 | No |
| 22515 | Gm24618 | 0.0000 | No |
| 22516 | Gm24620 | 0.0000 | No |
| 22517 | Gm24621 | 0.0000 | No |
| 22518 | Gm24623 | 0.0000 | No |
| 22519 | Gm24624 | 0.0000 | No |
| 22520 | Gm24625 | 0.0000 | No |
| 22521 | Gm24626 | 0.0000 | No |
| 22522 | Gm24627 | 0.0000 | No |
| 22523 | Gm24628 | 0.0000 | No |
| 22524 | Gm24629 | 0.0000 | No |
| 22525 | Gm24630 | 0.0000 | No |
| 22526 | Gm24631 | 0.0000 | No |
| 22527 | Gm24632 | 0.0000 | No |
| 22528 | Gm24633 | 0.0000 | No |
| 22529 | Gm24634 | 0.0000 | No |
| 22530 | Gm24635 | 0.0000 | No |
| 22531 | Gm24636 | 0.0000 | No |
| 22532 | Gm24637 | 0.0000 | No |
| 22533 | Gm24638 | 0.0000 | No |
| 22534 | Gm24639 | 0.0000 | No |
| 22535 | Gm2464  | 0.0000 | No |
| 22536 | Gm24640 | 0.0000 | No |
| 22537 | Gm24641 | 0.0000 | No |

|       |         |        |    |
|-------|---------|--------|----|
| 22538 | Gm24644 | 0.0000 | No |
| 22539 | Gm24646 | 0.0000 | No |
| 22540 | Gm24648 | 0.0000 | No |
| 22541 | Gm24650 | 0.0000 | No |
| 22542 | Gm24651 | 0.0000 | No |
| 22543 | Gm24652 | 0.0000 | No |
| 22544 | Gm24653 | 0.0000 | No |
| 22545 | Gm24654 | 0.0000 | No |
| 22546 | Gm24655 | 0.0000 | No |
| 22547 | Gm24656 | 0.0000 | No |
| 22548 | Gm24657 | 0.0000 | No |
| 22549 | Gm24659 | 0.0000 | No |
| 22550 | Gm24661 | 0.0000 | No |
| 22551 | Gm24665 | 0.0000 | No |
| 22552 | Gm24666 | 0.0000 | No |
| 22553 | Gm24667 | 0.0000 | No |
| 22554 | Gm24668 | 0.0000 | No |
| 22555 | Gm24669 | 0.0000 | No |
| 22556 | Gm2467  | 0.0000 | No |
| 22557 | Gm24670 | 0.0000 | No |
| 22558 | Gm24673 | 0.0000 | No |
| 22559 | Gm24674 | 0.0000 | No |
| 22560 | Gm24675 | 0.0000 | No |
| 22561 | Gm24676 | 0.0000 | No |
| 22562 | Gm24677 | 0.0000 | No |
| 22563 | Gm24678 | 0.0000 | No |
| 22564 | Gm24679 | 0.0000 | No |
| 22565 | Gm24680 | 0.0000 | No |
| 22566 | Gm24681 | 0.0000 | No |
| 22567 | Gm24682 | 0.0000 | No |
| 22568 | Gm24683 | 0.0000 | No |
| 22569 | Gm24685 | 0.0000 | No |
| 22570 | Gm24686 | 0.0000 | No |
| 22571 | Gm24687 | 0.0000 | No |
| 22572 | Gm24689 | 0.0000 | No |
| 22573 | Gm24691 | 0.0000 | No |
| 22574 | Gm24692 | 0.0000 | No |
| 22575 | Gm24694 | 0.0000 | No |
| 22576 | Gm24695 | 0.0000 | No |
| 22577 | Gm24696 | 0.0000 | No |
| 22578 | Gm24697 | 0.0000 | No |
| 22579 | Gm24698 | 0.0000 | No |
| 22580 | Gm24701 | 0.0000 | No |
| 22581 | Gm24702 | 0.0000 | No |
| 22582 | Gm24704 | 0.0000 | No |
| 22583 | Gm24705 | 0.0000 | No |

|       |         |        |    |
|-------|---------|--------|----|
| 22584 | Gm24706 | 0.0000 | No |
| 22585 | Gm24707 | 0.0000 | No |
| 22586 | Gm24708 | 0.0000 | No |
| 22587 | Gm24709 | 0.0000 | No |
| 22588 | Gm24710 | 0.0000 | No |
| 22589 | Gm24711 | 0.0000 | No |
| 22590 | Gm24712 | 0.0000 | No |
| 22591 | Gm24713 | 0.0000 | No |
| 22592 | Gm24714 | 0.0000 | No |
| 22593 | Gm24715 | 0.0000 | No |
| 22594 | Gm24716 | 0.0000 | No |
| 22595 | Gm24717 | 0.0000 | No |
| 22596 | Gm24718 | 0.0000 | No |
| 22597 | Gm24719 | 0.0000 | No |
| 22598 | Gm24721 | 0.0000 | No |
| 22599 | Gm24722 | 0.0000 | No |
| 22600 | Gm24723 | 0.0000 | No |
| 22601 | Gm24724 | 0.0000 | No |
| 22602 | Gm24725 | 0.0000 | No |
| 22603 | Gm24726 | 0.0000 | No |
| 22604 | Gm24727 | 0.0000 | No |
| 22605 | Gm24728 | 0.0000 | No |
| 22606 | Gm24729 | 0.0000 | No |
| 22607 | Gm24730 | 0.0000 | No |
| 22608 | Gm24731 | 0.0000 | No |
| 22609 | Gm24732 | 0.0000 | No |
| 22610 | Gm24733 | 0.0000 | No |
| 22611 | Gm24734 | 0.0000 | No |
| 22612 | Gm24735 | 0.0000 | No |
| 22613 | Gm24736 | 0.0000 | No |
| 22614 | Gm24737 | 0.0000 | No |
| 22615 | Gm24739 | 0.0000 | No |
| 22616 | Gm2474  | 0.0000 | No |
| 22617 | Gm24744 | 0.0000 | No |
| 22618 | Gm24745 | 0.0000 | No |
| 22619 | Gm24748 | 0.0000 | No |
| 22620 | Gm24749 | 0.0000 | No |
| 22621 | Gm24750 | 0.0000 | No |
| 22622 | Gm24751 | 0.0000 | No |
| 22623 | Gm24752 | 0.0000 | No |
| 22624 | Gm24753 | 0.0000 | No |
| 22625 | Gm24755 | 0.0000 | No |
| 22626 | Gm24756 | 0.0000 | No |
| 22627 | Gm24757 | 0.0000 | No |
| 22628 | Gm24759 | 0.0000 | No |
| 22629 | Gm24760 | 0.0000 | No |

|       |         |        |    |
|-------|---------|--------|----|
| 22630 | Gm24761 | 0.0000 | No |
| 22631 | Gm24762 | 0.0000 | No |
| 22632 | Gm24764 | 0.0000 | No |
| 22633 | Gm24766 | 0.0000 | No |
| 22634 | Gm24767 | 0.0000 | No |
| 22635 | Gm24768 | 0.0000 | No |
| 22636 | Gm24769 | 0.0000 | No |
| 22637 | Gm24770 | 0.0000 | No |
| 22638 | Gm24771 | 0.0000 | No |
| 22639 | Gm24773 | 0.0000 | No |
| 22640 | Gm24775 | 0.0000 | No |
| 22641 | Gm24780 | 0.0000 | No |
| 22642 | Gm24781 | 0.0000 | No |
| 22643 | Gm24782 | 0.0000 | No |
| 22644 | Gm24783 | 0.0000 | No |
| 22645 | Gm24784 | 0.0000 | No |
| 22646 | Gm24787 | 0.0000 | No |
| 22647 | Gm24788 | 0.0000 | No |
| 22648 | Gm24789 | 0.0000 | No |
| 22649 | Gm24790 | 0.0000 | No |
| 22650 | Gm24791 | 0.0000 | No |
| 22651 | Gm24792 | 0.0000 | No |
| 22652 | Gm24793 | 0.0000 | No |
| 22653 | Gm24794 | 0.0000 | No |
| 22654 | Gm24795 | 0.0000 | No |
| 22655 | Gm24796 | 0.0000 | No |
| 22656 | Gm24797 | 0.0000 | No |
| 22657 | Gm24798 | 0.0000 | No |
| 22658 | Gm24799 | 0.0000 | No |
| 22659 | Gm24801 | 0.0000 | No |
| 22660 | Gm24802 | 0.0000 | No |
| 22661 | Gm24803 | 0.0000 | No |
| 22662 | Gm24804 | 0.0000 | No |
| 22663 | Gm24806 | 0.0000 | No |
| 22664 | Gm24809 | 0.0000 | No |
| 22665 | Gm24810 | 0.0000 | No |
| 22666 | Gm24811 | 0.0000 | No |
| 22667 | Gm24812 | 0.0000 | No |
| 22668 | Gm24813 | 0.0000 | No |
| 22669 | Gm24817 | 0.0000 | No |
| 22670 | Gm24818 | 0.0000 | No |
| 22671 | Gm24819 | 0.0000 | No |
| 22672 | Gm24824 | 0.0000 | No |
| 22673 | Gm24826 | 0.0000 | No |
| 22674 | Gm24829 | 0.0000 | No |
| 22675 | Gm24830 | 0.0000 | No |

|       |         |        |    |
|-------|---------|--------|----|
| 22676 | Gm24831 | 0.0000 | No |
| 22677 | Gm24833 | 0.0000 | No |
| 22678 | Gm24835 | 0.0000 | No |
| 22679 | Gm24836 | 0.0000 | No |
| 22680 | Gm24837 | 0.0000 | No |
| 22681 | Gm24839 | 0.0000 | No |
| 22682 | Gm24840 | 0.0000 | No |
| 22683 | Gm24842 | 0.0000 | No |
| 22684 | Gm24843 | 0.0000 | No |
| 22685 | Gm24844 | 0.0000 | No |
| 22686 | Gm24846 | 0.0000 | No |
| 22687 | Gm24847 | 0.0000 | No |
| 22688 | Gm24848 | 0.0000 | No |
| 22689 | Gm24850 | 0.0000 | No |
| 22690 | Gm24853 | 0.0000 | No |
| 22691 | Gm24854 | 0.0000 | No |
| 22692 | Gm24855 | 0.0000 | No |
| 22693 | Gm24856 | 0.0000 | No |
| 22694 | Gm24857 | 0.0000 | No |
| 22695 | Gm24860 | 0.0000 | No |
| 22696 | Gm24861 | 0.0000 | No |
| 22697 | Gm24862 | 0.0000 | No |
| 22698 | Gm24863 | 0.0000 | No |
| 22699 | Gm24865 | 0.0000 | No |
| 22700 | Gm24866 | 0.0000 | No |
| 22701 | Gm24867 | 0.0000 | No |
| 22702 | Gm24868 | 0.0000 | No |
| 22703 | Gm24869 | 0.0000 | No |
| 22704 | Gm24870 | 0.0000 | No |
| 22705 | Gm24871 | 0.0000 | No |
| 22706 | Gm24872 | 0.0000 | No |
| 22707 | Gm24875 | 0.0000 | No |
| 22708 | Gm24877 | 0.0000 | No |
| 22709 | Gm24878 | 0.0000 | No |
| 22710 | Gm24879 | 0.0000 | No |
| 22711 | Gm24883 | 0.0000 | No |
| 22712 | Gm24884 | 0.0000 | No |
| 22713 | Gm24885 | 0.0000 | No |
| 22714 | Gm24886 | 0.0000 | No |
| 22715 | Gm24887 | 0.0000 | No |
| 22716 | Gm24888 | 0.0000 | No |
| 22717 | Gm24889 | 0.0000 | No |
| 22718 | Gm24890 | 0.0000 | No |
| 22719 | Gm24891 | 0.0000 | No |
| 22720 | Gm24892 | 0.0000 | No |
| 22721 | Gm24894 | 0.0000 | No |

|       |         |        |    |
|-------|---------|--------|----|
| 22722 | Gm24895 | 0.0000 | No |
| 22723 | Gm24898 | 0.0000 | No |
| 22724 | Gm24899 | 0.0000 | No |
| 22725 | Gm24900 | 0.0000 | No |
| 22726 | Gm24901 | 0.0000 | No |
| 22727 | Gm24902 | 0.0000 | No |
| 22728 | Gm24903 | 0.0000 | No |
| 22729 | Gm24909 | 0.0000 | No |
| 22730 | Gm24910 | 0.0000 | No |
| 22731 | Gm24911 | 0.0000 | No |
| 22732 | Gm24912 | 0.0000 | No |
| 22733 | Gm24913 | 0.0000 | No |
| 22734 | Gm24914 | 0.0000 | No |
| 22735 | Gm24916 | 0.0000 | No |
| 22736 | Gm24917 | 0.0000 | No |
| 22737 | Gm24918 | 0.0000 | No |
| 22738 | Gm24919 | 0.0000 | No |
| 22739 | Gm24920 | 0.0000 | No |
| 22740 | Gm24921 | 0.0000 | No |
| 22741 | Gm24922 | 0.0000 | No |
| 22742 | Gm24923 | 0.0000 | No |
| 22743 | Gm24924 | 0.0000 | No |
| 22744 | Gm24925 | 0.0000 | No |
| 22745 | Gm24926 | 0.0000 | No |
| 22746 | Gm24927 | 0.0000 | No |
| 22747 | Gm24928 | 0.0000 | No |
| 22748 | Gm24929 | 0.0000 | No |
| 22749 | Gm24932 | 0.0000 | No |
| 22750 | Gm24933 | 0.0000 | No |
| 22751 | Gm24934 | 0.0000 | No |
| 22752 | Gm24935 | 0.0000 | No |
| 22753 | Gm24936 | 0.0000 | No |
| 22754 | Gm24937 | 0.0000 | No |
| 22755 | Gm24938 | 0.0000 | No |
| 22756 | Gm24940 | 0.0000 | No |
| 22757 | Gm24942 | 0.0000 | No |
| 22758 | Gm24943 | 0.0000 | No |
| 22759 | Gm24944 | 0.0000 | No |
| 22760 | Gm24945 | 0.0000 | No |
| 22761 | Gm24946 | 0.0000 | No |
| 22762 | Gm24949 | 0.0000 | No |
| 22763 | Gm2495  | 0.0000 | No |
| 22764 | Gm24950 | 0.0000 | No |
| 22765 | Gm24951 | 0.0000 | No |
| 22766 | Gm24952 | 0.0000 | No |
| 22767 | Gm24954 | 0.0000 | No |

|       |         |        |    |
|-------|---------|--------|----|
| 22768 | Gm24958 | 0.0000 | No |
| 22769 | Gm24959 | 0.0000 | No |
| 22770 | Gm24960 | 0.0000 | No |
| 22771 | Gm24961 | 0.0000 | No |
| 22772 | Gm24962 | 0.0000 | No |
| 22773 | Gm24963 | 0.0000 | No |
| 22774 | Gm24966 | 0.0000 | No |
| 22775 | Gm24967 | 0.0000 | No |
| 22776 | Gm24968 | 0.0000 | No |
| 22777 | Gm24969 | 0.0000 | No |
| 22778 | Gm24970 | 0.0000 | No |
| 22779 | Gm24973 | 0.0000 | No |
| 22780 | Gm24975 | 0.0000 | No |
| 22781 | Gm24977 | 0.0000 | No |
| 22782 | Gm24978 | 0.0000 | No |
| 22783 | Gm24979 | 0.0000 | No |
| 22784 | Gm24981 | 0.0000 | No |
| 22785 | Gm24982 | 0.0000 | No |
| 22786 | Gm24983 | 0.0000 | No |
| 22787 | Gm24984 | 0.0000 | No |
| 22788 | Gm24985 | 0.0000 | No |
| 22789 | Gm24986 | 0.0000 | No |
| 22790 | Gm24987 | 0.0000 | No |
| 22791 | Gm24988 | 0.0000 | No |
| 22792 | Gm24989 | 0.0000 | No |
| 22793 | Gm24992 | 0.0000 | No |
| 22794 | Gm24993 | 0.0000 | No |
| 22795 | Gm24994 | 0.0000 | No |
| 22796 | Gm24996 | 0.0000 | No |
| 22797 | Gm24997 | 0.0000 | No |
| 22798 | Gm24998 | 0.0000 | No |
| 22799 | Gm24999 | 0.0000 | No |
| 22800 | Gm25000 | 0.0000 | No |
| 22801 | Gm25002 | 0.0000 | No |
| 22802 | Gm25004 | 0.0000 | No |
| 22803 | Gm25005 | 0.0000 | No |
| 22804 | Gm25006 | 0.0000 | No |
| 22805 | Gm25007 | 0.0000 | No |
| 22806 | Gm25008 | 0.0000 | No |
| 22807 | Gm25009 | 0.0000 | No |
| 22808 | Gm25010 | 0.0000 | No |
| 22809 | Gm25011 | 0.0000 | No |
| 22810 | Gm25012 | 0.0000 | No |
| 22811 | Gm25013 | 0.0000 | No |
| 22812 | Gm25014 | 0.0000 | No |
| 22813 | Gm25015 | 0.0000 | No |



|       |         |        |    |
|-------|---------|--------|----|
| 22814 | Gm25016 | 0.0000 | No |
| 22815 | Gm25017 | 0.0000 | No |
| 22816 | Gm25019 | 0.0000 | No |
| 22817 | Gm25020 | 0.0000 | No |
| 22818 | Gm25021 | 0.0000 | No |
| 22819 | Gm25022 | 0.0000 | No |
| 22820 | Gm25023 | 0.0000 | No |
| 22821 | Gm25024 | 0.0000 | No |
| 22822 | Gm25025 | 0.0000 | No |
| 22823 | Gm25026 | 0.0000 | No |
| 22824 | Gm25032 | 0.0000 | No |
| 22825 | Gm25033 | 0.0000 | No |
| 22826 | Gm25035 | 0.0000 | No |
| 22827 | Gm25036 | 0.0000 | No |
| 22828 | Gm25037 | 0.0000 | No |
| 22829 | Gm25038 | 0.0000 | No |
| 22830 | Gm25039 | 0.0000 | No |
| 22831 | Gm25040 | 0.0000 | No |
| 22832 | Gm25041 | 0.0000 | No |
| 22833 | Gm25042 | 0.0000 | No |
| 22834 | Gm25043 | 0.0000 | No |
| 22835 | Gm25044 | 0.0000 | No |
| 22836 | Gm25045 | 0.0000 | No |
| 22837 | Gm25047 | 0.0000 | No |
| 22838 | Gm25048 | 0.0000 | No |
| 22839 | Gm25049 | 0.0000 | No |
| 22840 | Gm2505  | 0.0000 | No |
| 22841 | Gm25051 | 0.0000 | No |
| 22842 | Gm25052 | 0.0000 | No |
| 22843 | Gm25053 | 0.0000 | No |
| 22844 | Gm25054 | 0.0000 | No |
| 22845 | Gm25055 | 0.0000 | No |
| 22846 | Gm25056 | 0.0000 | No |
| 22847 | Gm25059 | 0.0000 | No |
| 22848 | Gm25060 | 0.0000 | No |
| 22849 | Gm25061 | 0.0000 | No |
| 22850 | Gm25063 | 0.0000 | No |
| 22851 | Gm25064 | 0.0000 | No |
| 22852 | Gm25065 | 0.0000 | No |
| 22853 | Gm25066 | 0.0000 | No |
| 22854 | Gm25068 | 0.0000 | No |
| 22855 | Gm25071 | 0.0000 | No |
| 22856 | Gm25072 | 0.0000 | No |
| 22857 | Gm25074 | 0.0000 | No |
| 22858 | Gm25076 | 0.0000 | No |
| 22859 | Gm25077 | 0.0000 | No |

|       |         |        |    |
|-------|---------|--------|----|
| 22860 | Gm25078 | 0.0000 | No |
| 22861 | Gm25079 | 0.0000 | No |
| 22862 | Gm25080 | 0.0000 | No |
| 22863 | Gm25081 | 0.0000 | No |
| 22864 | Gm25082 | 0.0000 | No |
| 22865 | Gm25083 | 0.0000 | No |
| 22866 | Gm25084 | 0.0000 | No |
| 22867 | Gm25085 | 0.0000 | No |
| 22868 | Gm25086 | 0.0000 | No |
| 22869 | Gm25087 | 0.0000 | No |
| 22870 | Gm25088 | 0.0000 | No |
| 22871 | Gm25089 | 0.0000 | No |
| 22872 | Gm25090 | 0.0000 | No |
| 22873 | Gm25091 | 0.0000 | No |
| 22874 | Gm25092 | 0.0000 | No |
| 22875 | Gm25093 | 0.0000 | No |
| 22876 | Gm25094 | 0.0000 | No |
| 22877 | Gm25095 | 0.0000 | No |
| 22878 | Gm25096 | 0.0000 | No |
| 22879 | Gm25097 | 0.0000 | No |
| 22880 | Gm25098 | 0.0000 | No |
| 22881 | Gm25100 | 0.0000 | No |
| 22882 | Gm25101 | 0.0000 | No |
| 22883 | Gm25102 | 0.0000 | No |
| 22884 | Gm25103 | 0.0000 | No |
| 22885 | Gm25105 | 0.0000 | No |
| 22886 | Gm25106 | 0.0000 | No |
| 22887 | Gm25107 | 0.0000 | No |
| 22888 | Gm25108 | 0.0000 | No |
| 22889 | Gm25109 | 0.0000 | No |
| 22890 | Gm2511  | 0.0000 | No |
| 22891 | Gm25110 | 0.0000 | No |
| 22892 | Gm25111 | 0.0000 | No |
| 22893 | Gm25112 | 0.0000 | No |
| 22894 | Gm25115 | 0.0000 | No |
| 22895 | Gm25116 | 0.0000 | No |
| 22896 | Gm25117 | 0.0000 | No |
| 22897 | Gm25119 | 0.0000 | No |
| 22898 | Gm25120 | 0.0000 | No |
| 22899 | Gm25121 | 0.0000 | No |
| 22900 | Gm25123 | 0.0000 | No |
| 22901 | Gm25124 | 0.0000 | No |
| 22902 | Gm25126 | 0.0000 | No |
| 22903 | Gm25127 | 0.0000 | No |
| 22904 | Gm25128 | 0.0000 | No |
| 22905 | Gm25129 | 0.0000 | No |

|       |         |        |    |
|-------|---------|--------|----|
| 22906 | Gm25130 | 0.0000 | No |
| 22907 | Gm25131 | 0.0000 | No |
| 22908 | Gm25133 | 0.0000 | No |
| 22909 | Gm25134 | 0.0000 | No |
| 22910 | Gm25136 | 0.0000 | No |
| 22911 | Gm25137 | 0.0000 | No |
| 22912 | Gm25138 | 0.0000 | No |
| 22913 | Gm25139 | 0.0000 | No |
| 22914 | Gm25140 | 0.0000 | No |
| 22915 | Gm25141 | 0.0000 | No |
| 22916 | Gm25142 | 0.0000 | No |
| 22917 | Gm25143 | 0.0000 | No |
| 22918 | Gm25144 | 0.0000 | No |
| 22919 | Gm25145 | 0.0000 | No |
| 22920 | Gm25146 | 0.0000 | No |
| 22921 | Gm25147 | 0.0000 | No |
| 22922 | Gm25148 | 0.0000 | No |
| 22923 | Gm25150 | 0.0000 | No |
| 22924 | Gm25151 | 0.0000 | No |
| 22925 | Gm25152 | 0.0000 | No |
| 22926 | Gm25153 | 0.0000 | No |
| 22927 | Gm25155 | 0.0000 | No |
| 22928 | Gm25156 | 0.0000 | No |
| 22929 | Gm25157 | 0.0000 | No |
| 22930 | Gm25158 | 0.0000 | No |
| 22931 | Gm2516  | 0.0000 | No |
| 22932 | Gm25160 | 0.0000 | No |
| 22933 | Gm25161 | 0.0000 | No |
| 22934 | Gm25166 | 0.0000 | No |
| 22935 | Gm25167 | 0.0000 | No |
| 22936 | Gm25168 | 0.0000 | No |
| 22937 | Gm25169 | 0.0000 | No |
| 22938 | Gm25170 | 0.0000 | No |
| 22939 | Gm25171 | 0.0000 | No |
| 22940 | Gm25173 | 0.0000 | No |
| 22941 | Gm25175 | 0.0000 | No |
| 22942 | Gm25176 | 0.0000 | No |
| 22943 | Gm25177 | 0.0000 | No |
| 22944 | Gm25178 | 0.0000 | No |
| 22945 | Gm25179 | 0.0000 | No |
| 22946 | Gm25184 | 0.0000 | No |
| 22947 | Gm25185 | 0.0000 | No |
| 22948 | Gm25186 | 0.0000 | No |
| 22949 | Gm25187 | 0.0000 | No |
| 22950 | Gm25188 | 0.0000 | No |
| 22951 | Gm25189 | 0.0000 | No |

|       |         |        |    |
|-------|---------|--------|----|
| 22952 | Gm25190 | 0.0000 | No |
| 22953 | Gm25193 | 0.0000 | No |
| 22954 | Gm25194 | 0.0000 | No |
| 22955 | Gm25195 | 0.0000 | No |
| 22956 | Gm25197 | 0.0000 | No |
| 22957 | Gm25198 | 0.0000 | No |
| 22958 | Gm25199 | 0.0000 | No |
| 22959 | Gm25200 | 0.0000 | No |
| 22960 | Gm25201 | 0.0000 | No |
| 22961 | Gm25202 | 0.0000 | No |
| 22962 | Gm25203 | 0.0000 | No |
| 22963 | Gm25204 | 0.0000 | No |
| 22964 | Gm25205 | 0.0000 | No |
| 22965 | Gm25208 | 0.0000 | No |
| 22966 | Gm25209 | 0.0000 | No |
| 22967 | Gm25210 | 0.0000 | No |
| 22968 | Gm25211 | 0.0000 | No |
| 22969 | Gm25213 | 0.0000 | No |
| 22970 | Gm25214 | 0.0000 | No |
| 22971 | Gm25215 | 0.0000 | No |
| 22972 | Gm25216 | 0.0000 | No |
| 22973 | Gm25217 | 0.0000 | No |
| 22974 | Gm25219 | 0.0000 | No |
| 22975 | Gm2522  | 0.0000 | No |
| 22976 | Gm25220 | 0.0000 | No |
| 22977 | Gm25221 | 0.0000 | No |
| 22978 | Gm25222 | 0.0000 | No |
| 22979 | Gm25223 | 0.0000 | No |
| 22980 | Gm25224 | 0.0000 | No |
| 22981 | Gm25225 | 0.0000 | No |
| 22982 | Gm25226 | 0.0000 | No |
| 22983 | Gm25228 | 0.0000 | No |
| 22984 | Gm25229 | 0.0000 | No |
| 22985 | Gm25230 | 0.0000 | No |
| 22986 | Gm25232 | 0.0000 | No |
| 22987 | Gm25235 | 0.0000 | No |
| 22988 | Gm25238 | 0.0000 | No |
| 22989 | Gm25239 | 0.0000 | No |
| 22990 | Gm25240 | 0.0000 | No |
| 22991 | Gm25241 | 0.0000 | No |
| 22992 | Gm25243 | 0.0000 | No |
| 22993 | Gm25244 | 0.0000 | No |
| 22994 | Gm25245 | 0.0000 | No |
| 22995 | Gm25246 | 0.0000 | No |
| 22996 | Gm25247 | 0.0000 | No |
| 22997 | Gm25248 | 0.0000 | No |

|       |         |        |    |
|-------|---------|--------|----|
| 22998 | Gm25249 | 0.0000 | No |
| 22999 | Gm25250 | 0.0000 | No |
| 23000 | Gm25252 | 0.0000 | No |
| 23001 | Gm25253 | 0.0000 | No |
| 23002 | Gm25254 | 0.0000 | No |
| 23003 | Gm25255 | 0.0000 | No |
| 23004 | Gm25256 | 0.0000 | No |
| 23005 | Gm25257 | 0.0000 | No |
| 23006 | Gm25258 | 0.0000 | No |
| 23007 | Gm25259 | 0.0000 | No |
| 23008 | Gm25260 | 0.0000 | No |
| 23009 | Gm25261 | 0.0000 | No |
| 23010 | Gm25262 | 0.0000 | No |
| 23011 | Gm25263 | 0.0000 | No |
| 23012 | Gm25264 | 0.0000 | No |
| 23013 | Gm25265 | 0.0000 | No |
| 23014 | Gm25266 | 0.0000 | No |
| 23015 | Gm25268 | 0.0000 | No |
| 23016 | Gm25269 | 0.0000 | No |
| 23017 | Gm25270 | 0.0000 | No |
| 23018 | Gm25272 | 0.0000 | No |
| 23019 | Gm25273 | 0.0000 | No |
| 23020 | Gm25274 | 0.0000 | No |
| 23021 | Gm25275 | 0.0000 | No |
| 23022 | Gm25276 | 0.0000 | No |
| 23023 | Gm25277 | 0.0000 | No |
| 23024 | Gm25278 | 0.0000 | No |
| 23025 | Gm25279 | 0.0000 | No |
| 23026 | Gm25280 | 0.0000 | No |
| 23027 | Gm25281 | 0.0000 | No |
| 23028 | Gm25282 | 0.0000 | No |
| 23029 | Gm25283 | 0.0000 | No |
| 23030 | Gm25284 | 0.0000 | No |
| 23031 | Gm25285 | 0.0000 | No |
| 23032 | Gm25286 | 0.0000 | No |
| 23033 | Gm25287 | 0.0000 | No |
| 23034 | Gm25288 | 0.0000 | No |
| 23035 | Gm25289 | 0.0000 | No |
| 23036 | Gm25290 | 0.0000 | No |
| 23037 | Gm25291 | 0.0000 | No |
| 23038 | Gm25292 | 0.0000 | No |
| 23039 | Gm25293 | 0.0000 | No |
| 23040 | Gm25294 | 0.0000 | No |
| 23041 | Gm25295 | 0.0000 | No |
| 23042 | Gm25296 | 0.0000 | No |
| 23043 | Gm25297 | 0.0000 | No |

|       |         |        |    |
|-------|---------|--------|----|
| 23044 | Gm25299 | 0.0000 | No |
| 23045 | Gm25300 | 0.0000 | No |
| 23046 | Gm25301 | 0.0000 | No |
| 23047 | Gm25306 | 0.0000 | No |
| 23048 | Gm25307 | 0.0000 | No |
| 23049 | Gm25308 | 0.0000 | No |
| 23050 | Gm25309 | 0.0000 | No |
| 23051 | Gm2531  | 0.0000 | No |
| 23052 | Gm25311 | 0.0000 | No |
| 23053 | Gm25312 | 0.0000 | No |
| 23054 | Gm25313 | 0.0000 | No |
| 23055 | Gm25314 | 0.0000 | No |
| 23056 | Gm25315 | 0.0000 | No |
| 23057 | Gm25316 | 0.0000 | No |
| 23058 | Gm25317 | 0.0000 | No |
| 23059 | Gm25318 | 0.0000 | No |
| 23060 | Gm25319 | 0.0000 | No |
| 23061 | Gm25320 | 0.0000 | No |
| 23062 | Gm25321 | 0.0000 | No |
| 23063 | Gm25322 | 0.0000 | No |
| 23064 | Gm25323 | 0.0000 | No |
| 23065 | Gm25325 | 0.0000 | No |
| 23066 | Gm25326 | 0.0000 | No |
| 23067 | Gm25327 | 0.0000 | No |
| 23068 | Gm25328 | 0.0000 | No |
| 23069 | Gm25332 | 0.0000 | No |
| 23070 | Gm25333 | 0.0000 | No |
| 23071 | Gm25334 | 0.0000 | No |
| 23072 | Gm25336 | 0.0000 | No |
| 23073 | Gm25337 | 0.0000 | No |
| 23074 | Gm25338 | 0.0000 | No |
| 23075 | Gm25341 | 0.0000 | No |
| 23076 | Gm25342 | 0.0000 | No |
| 23077 | Gm25343 | 0.0000 | No |
| 23078 | Gm25344 | 0.0000 | No |
| 23079 | Gm25346 | 0.0000 | No |
| 23080 | Gm25347 | 0.0000 | No |
| 23081 | Gm25349 | 0.0000 | No |
| 23082 | Gm25350 | 0.0000 | No |
| 23083 | Gm25352 | 0.0000 | No |
| 23084 | Gm25353 | 0.0000 | No |
| 23085 | Gm25354 | 0.0000 | No |
| 23086 | Gm25357 | 0.0000 | No |
| 23087 | Gm25360 | 0.0000 | No |
| 23088 | Gm25361 | 0.0000 | No |
| 23089 | Gm25362 | 0.0000 | No |

|       |         |        |    |
|-------|---------|--------|----|
| 23090 | Gm25363 | 0.0000 | No |
| 23091 | Gm25364 | 0.0000 | No |
| 23092 | Gm25366 | 0.0000 | No |
| 23093 | Gm25367 | 0.0000 | No |
| 23094 | Gm25370 | 0.0000 | No |
| 23095 | Gm25371 | 0.0000 | No |
| 23096 | Gm25372 | 0.0000 | No |
| 23097 | Gm25373 | 0.0000 | No |
| 23098 | Gm25374 | 0.0000 | No |
| 23099 | Gm25375 | 0.0000 | No |
| 23100 | Gm25376 | 0.0000 | No |
| 23101 | Gm25377 | 0.0000 | No |
| 23102 | Gm25378 | 0.0000 | No |
| 23103 | Gm25379 | 0.0000 | No |
| 23104 | Gm25380 | 0.0000 | No |
| 23105 | Gm25382 | 0.0000 | No |
| 23106 | Gm25383 | 0.0000 | No |
| 23107 | Gm25386 | 0.0000 | No |
| 23108 | Gm25387 | 0.0000 | No |
| 23109 | Gm25388 | 0.0000 | No |
| 23110 | Gm25389 | 0.0000 | No |
| 23111 | Gm25390 | 0.0000 | No |
| 23112 | Gm25391 | 0.0000 | No |
| 23113 | Gm25392 | 0.0000 | No |
| 23114 | Gm25393 | 0.0000 | No |
| 23115 | Gm25395 | 0.0000 | No |
| 23116 | Gm25396 | 0.0000 | No |
| 23117 | Gm25397 | 0.0000 | No |
| 23118 | Gm25399 | 0.0000 | No |
| 23119 | Gm25401 | 0.0000 | No |
| 23120 | Gm25402 | 0.0000 | No |
| 23121 | Gm25403 | 0.0000 | No |
| 23122 | Gm25404 | 0.0000 | No |
| 23123 | Gm25405 | 0.0000 | No |
| 23124 | Gm25406 | 0.0000 | No |
| 23125 | Gm25407 | 0.0000 | No |
| 23126 | Gm25408 | 0.0000 | No |
| 23127 | Gm25409 | 0.0000 | No |
| 23128 | Gm2541  | 0.0000 | No |
| 23129 | Gm25411 | 0.0000 | No |
| 23130 | Gm25412 | 0.0000 | No |
| 23131 | Gm25413 | 0.0000 | No |
| 23132 | Gm25414 | 0.0000 | No |
| 23133 | Gm25415 | 0.0000 | No |
| 23134 | Gm25416 | 0.0000 | No |
| 23135 | Gm25417 | 0.0000 | No |

|       |         |        |    |
|-------|---------|--------|----|
| 23136 | Gm25418 | 0.0000 | No |
| 23137 | Gm25419 | 0.0000 | No |
| 23138 | Gm25421 | 0.0000 | No |
| 23139 | Gm25423 | 0.0000 | No |
| 23140 | Gm25424 | 0.0000 | No |
| 23141 | Gm25425 | 0.0000 | No |
| 23142 | Gm25426 | 0.0000 | No |
| 23143 | Gm25427 | 0.0000 | No |
| 23144 | Gm25428 | 0.0000 | No |
| 23145 | Gm25429 | 0.0000 | No |
| 23146 | Gm25430 | 0.0000 | No |
| 23147 | Gm25431 | 0.0000 | No |
| 23148 | Gm25432 | 0.0000 | No |
| 23149 | Gm25433 | 0.0000 | No |
| 23150 | Gm25434 | 0.0000 | No |
| 23151 | Gm25435 | 0.0000 | No |
| 23152 | Gm25436 | 0.0000 | No |
| 23153 | Gm25437 | 0.0000 | No |
| 23154 | Gm25438 | 0.0000 | No |
| 23155 | Gm25439 | 0.0000 | No |
| 23156 | Gm25442 | 0.0000 | No |
| 23157 | Gm25443 | 0.0000 | No |
| 23158 | Gm25444 | 0.0000 | No |
| 23159 | Gm25445 | 0.0000 | No |
| 23160 | Gm25449 | 0.0000 | No |
| 23161 | Gm25450 | 0.0000 | No |
| 23162 | Gm25451 | 0.0000 | No |
| 23163 | Gm25452 | 0.0000 | No |
| 23164 | Gm25453 | 0.0000 | No |
| 23165 | Gm25454 | 0.0000 | No |
| 23166 | Gm25455 | 0.0000 | No |
| 23167 | Gm25456 | 0.0000 | No |
| 23168 | Gm25457 | 0.0000 | No |
| 23169 | Gm25458 | 0.0000 | No |
| 23170 | Gm2546  | 0.0000 | No |
| 23171 | Gm25460 | 0.0000 | No |
| 23172 | Gm25461 | 0.0000 | No |
| 23173 | Gm25462 | 0.0000 | No |
| 23174 | Gm25463 | 0.0000 | No |
| 23175 | Gm25464 | 0.0000 | No |
| 23176 | Gm25465 | 0.0000 | No |
| 23177 | Gm25466 | 0.0000 | No |
| 23178 | Gm25470 | 0.0000 | No |
| 23179 | Gm25471 | 0.0000 | No |
| 23180 | Gm25472 | 0.0000 | No |
| 23181 | Gm25473 | 0.0000 | No |



|       |         |        |    |
|-------|---------|--------|----|
| 23182 | Gm25474 | 0.0000 | No |
| 23183 | Gm25475 | 0.0000 | No |
| 23184 | Gm25476 | 0.0000 | No |
| 23185 | Gm25480 | 0.0000 | No |
| 23186 | Gm25481 | 0.0000 | No |
| 23187 | Gm25482 | 0.0000 | No |
| 23188 | Gm25483 | 0.0000 | No |
| 23189 | Gm25484 | 0.0000 | No |
| 23190 | Gm25485 | 0.0000 | No |
| 23191 | Gm25486 | 0.0000 | No |
| 23192 | Gm25487 | 0.0000 | No |
| 23193 | Gm25489 | 0.0000 | No |
| 23194 | Gm25490 | 0.0000 | No |
| 23195 | Gm25491 | 0.0000 | No |
| 23196 | Gm25492 | 0.0000 | No |
| 23197 | Gm25493 | 0.0000 | No |
| 23198 | Gm25494 | 0.0000 | No |
| 23199 | Gm25495 | 0.0000 | No |
| 23200 | Gm25496 | 0.0000 | No |
| 23201 | Gm25497 | 0.0000 | No |
| 23202 | Gm25498 | 0.0000 | No |
| 23203 | Gm25499 | 0.0000 | No |
| 23204 | Gm25500 | 0.0000 | No |
| 23205 | Gm25501 | 0.0000 | No |
| 23206 | Gm25502 | 0.0000 | No |
| 23207 | Gm25505 | 0.0000 | No |
| 23208 | Gm25506 | 0.0000 | No |
| 23209 | Gm25507 | 0.0000 | No |
| 23210 | Gm25509 | 0.0000 | No |
| 23211 | Gm25510 | 0.0000 | No |
| 23212 | Gm25512 | 0.0000 | No |
| 23213 | Gm25513 | 0.0000 | No |
| 23214 | Gm25514 | 0.0000 | No |
| 23215 | Gm25515 | 0.0000 | No |
| 23216 | Gm25516 | 0.0000 | No |
| 23217 | Gm25517 | 0.0000 | No |
| 23218 | Gm25518 | 0.0000 | No |
| 23219 | Gm25519 | 0.0000 | No |
| 23220 | Gm25520 | 0.0000 | No |
| 23221 | Gm25521 | 0.0000 | No |
| 23222 | Gm25522 | 0.0000 | No |
| 23223 | Gm25523 | 0.0000 | No |
| 23224 | Gm25524 | 0.0000 | No |
| 23225 | Gm25525 | 0.0000 | No |
| 23226 | Gm25528 | 0.0000 | No |
| 23227 | Gm25529 | 0.0000 | No |

|       |         |        |    |
|-------|---------|--------|----|
| 23228 | Gm25534 | 0.0000 | No |
| 23229 | Gm25535 | 0.0000 | No |
| 23230 | Gm25537 | 0.0000 | No |
| 23231 | Gm25538 | 0.0000 | No |
| 23232 | Gm25539 | 0.0000 | No |
| 23233 | Gm25540 | 0.0000 | No |
| 23234 | Gm25542 | 0.0000 | No |
| 23235 | Gm25543 | 0.0000 | No |
| 23236 | Gm25544 | 0.0000 | No |
| 23237 | Gm25545 | 0.0000 | No |
| 23238 | Gm25546 | 0.0000 | No |
| 23239 | Gm25547 | 0.0000 | No |
| 23240 | Gm25548 | 0.0000 | No |
| 23241 | Gm25549 | 0.0000 | No |
| 23242 | Gm25552 | 0.0000 | No |
| 23243 | Gm25556 | 0.0000 | No |
| 23244 | Gm25557 | 0.0000 | No |
| 23245 | Gm25558 | 0.0000 | No |
| 23246 | Gm25559 | 0.0000 | No |
| 23247 | Gm25560 | 0.0000 | No |
| 23248 | Gm25561 | 0.0000 | No |
| 23249 | Gm25562 | 0.0000 | No |
| 23250 | Gm25563 | 0.0000 | No |
| 23251 | Gm25564 | 0.0000 | No |
| 23252 | Gm25565 | 0.0000 | No |
| 23253 | Gm25569 | 0.0000 | No |
| 23254 | Gm25570 | 0.0000 | No |
| 23255 | Gm25571 | 0.0000 | No |
| 23256 | Gm25572 | 0.0000 | No |
| 23257 | Gm25577 | 0.0000 | No |
| 23258 | Gm25578 | 0.0000 | No |
| 23259 | Gm25580 | 0.0000 | No |
| 23260 | Gm25581 | 0.0000 | No |
| 23261 | Gm25582 | 0.0000 | No |
| 23262 | Gm25585 | 0.0000 | No |
| 23263 | Gm25586 | 0.0000 | No |
| 23264 | Gm25587 | 0.0000 | No |
| 23265 | Gm25588 | 0.0000 | No |
| 23266 | Gm25589 | 0.0000 | No |
| 23267 | Gm2559  | 0.0000 | No |
| 23268 | Gm25592 | 0.0000 | No |
| 23269 | Gm25593 | 0.0000 | No |
| 23270 | Gm25594 | 0.0000 | No |
| 23271 | Gm25595 | 0.0000 | No |
| 23272 | Gm25596 | 0.0000 | No |
| 23273 | Gm25597 | 0.0000 | No |

|       |         |        |    |
|-------|---------|--------|----|
| 23274 | Gm25598 | 0.0000 | No |
| 23275 | Gm25599 | 0.0000 | No |
| 23276 | Gm25600 | 0.0000 | No |
| 23277 | Gm25601 | 0.0000 | No |
| 23278 | Gm25602 | 0.0000 | No |
| 23279 | Gm25603 | 0.0000 | No |
| 23280 | Gm25604 | 0.0000 | No |
| 23281 | Gm25607 | 0.0000 | No |
| 23282 | Gm25608 | 0.0000 | No |
| 23283 | Gm25609 | 0.0000 | No |
| 23284 | Gm25610 | 0.0000 | No |
| 23285 | Gm25612 | 0.0000 | No |
| 23286 | Gm25613 | 0.0000 | No |
| 23287 | Gm25614 | 0.0000 | No |
| 23288 | Gm25615 | 0.0000 | No |
| 23289 | Gm25617 | 0.0000 | No |
| 23290 | Gm25618 | 0.0000 | No |
| 23291 | Gm25619 | 0.0000 | No |
| 23292 | Gm25623 | 0.0000 | No |
| 23293 | Gm25624 | 0.0000 | No |
| 23294 | Gm25626 | 0.0000 | No |
| 23295 | Gm25627 | 0.0000 | No |
| 23296 | Gm25628 | 0.0000 | No |
| 23297 | Gm25629 | 0.0000 | No |
| 23298 | Gm25630 | 0.0000 | No |
| 23299 | Gm25631 | 0.0000 | No |
| 23300 | Gm25632 | 0.0000 | No |
| 23301 | Gm25634 | 0.0000 | No |
| 23302 | Gm25635 | 0.0000 | No |
| 23303 | Gm25636 | 0.0000 | No |
| 23304 | Gm25637 | 0.0000 | No |
| 23305 | Gm2564  | 0.0000 | No |
| 23306 | Gm25640 | 0.0000 | No |
| 23307 | Gm25641 | 0.0000 | No |
| 23308 | Gm25642 | 0.0000 | No |
| 23309 | Gm25643 | 0.0000 | No |
| 23310 | Gm25644 | 0.0000 | No |
| 23311 | Gm25646 | 0.0000 | No |
| 23312 | Gm25647 | 0.0000 | No |
| 23313 | Gm25648 | 0.0000 | No |
| 23314 | Gm25649 | 0.0000 | No |
| 23315 | Gm25650 | 0.0000 | No |
| 23316 | Gm25651 | 0.0000 | No |
| 23317 | Gm25652 | 0.0000 | No |
| 23318 | Gm25653 | 0.0000 | No |
| 23319 | Gm25654 | 0.0000 | No |

|       |         |        |    |
|-------|---------|--------|----|
| 23320 | Gm25655 | 0.0000 | No |
| 23321 | Gm25656 | 0.0000 | No |
| 23322 | Gm25657 | 0.0000 | No |
| 23323 | Gm25658 | 0.0000 | No |
| 23324 | Gm2566  | 0.0000 | No |
| 23325 | Gm25661 | 0.0000 | No |
| 23326 | Gm25663 | 0.0000 | No |
| 23327 | Gm25664 | 0.0000 | No |
| 23328 | Gm25665 | 0.0000 | No |
| 23329 | Gm25666 | 0.0000 | No |
| 23330 | Gm25667 | 0.0000 | No |
| 23331 | Gm25668 | 0.0000 | No |
| 23332 | Gm25670 | 0.0000 | No |
| 23333 | Gm25671 | 0.0000 | No |
| 23334 | Gm25672 | 0.0000 | No |
| 23335 | Gm25673 | 0.0000 | No |
| 23336 | Gm25677 | 0.0000 | No |
| 23337 | Gm25678 | 0.0000 | No |
| 23338 | Gm25679 | 0.0000 | No |
| 23339 | Gm2568  | 0.0000 | No |
| 23340 | Gm25680 | 0.0000 | No |
| 23341 | Gm25681 | 0.0000 | No |
| 23342 | Gm25683 | 0.0000 | No |
| 23343 | Gm25687 | 0.0000 | No |
| 23344 | Gm25690 | 0.0000 | No |
| 23345 | Gm25692 | 0.0000 | No |
| 23346 | Gm25693 | 0.0000 | No |
| 23347 | Gm25694 | 0.0000 | No |
| 23348 | Gm25696 | 0.0000 | No |
| 23349 | Gm25697 | 0.0000 | No |
| 23350 | Gm25698 | 0.0000 | No |
| 23351 | Gm25699 | 0.0000 | No |
| 23352 | Gm25700 | 0.0000 | No |
| 23353 | Gm25701 | 0.0000 | No |
| 23354 | Gm25702 | 0.0000 | No |
| 23355 | Gm25703 | 0.0000 | No |
| 23356 | Gm25704 | 0.0000 | No |
| 23357 | Gm25705 | 0.0000 | No |
| 23358 | Gm25708 | 0.0000 | No |
| 23359 | Gm25709 | 0.0000 | No |
| 23360 | Gm25710 | 0.0000 | No |
| 23361 | Gm25711 | 0.0000 | No |
| 23362 | Gm25713 | 0.0000 | No |
| 23363 | Gm25714 | 0.0000 | No |
| 23364 | Gm25715 | 0.0000 | No |
| 23365 | Gm25716 | 0.0000 | No |

|       |         |        |    |
|-------|---------|--------|----|
| 23366 | Gm25717 | 0.0000 | No |
| 23367 | Gm25718 | 0.0000 | No |
| 23368 | Gm25720 | 0.0000 | No |
| 23369 | Gm25721 | 0.0000 | No |
| 23370 | Gm25722 | 0.0000 | No |
| 23371 | Gm25723 | 0.0000 | No |
| 23372 | Gm25724 | 0.0000 | No |
| 23373 | Gm25725 | 0.0000 | No |
| 23374 | Gm25726 | 0.0000 | No |
| 23375 | Gm25728 | 0.0000 | No |
| 23376 | Gm25730 | 0.0000 | No |
| 23377 | Gm25731 | 0.0000 | No |
| 23378 | Gm25732 | 0.0000 | No |
| 23379 | Gm25735 | 0.0000 | No |
| 23380 | Gm25736 | 0.0000 | No |
| 23381 | Gm25737 | 0.0000 | No |
| 23382 | Gm25739 | 0.0000 | No |
| 23383 | Gm2574  | 0.0000 | No |
| 23384 | Gm25740 | 0.0000 | No |
| 23385 | Gm25741 | 0.0000 | No |
| 23386 | Gm25742 | 0.0000 | No |
| 23387 | Gm25744 | 0.0000 | No |
| 23388 | Gm25745 | 0.0000 | No |
| 23389 | Gm25748 | 0.0000 | No |
| 23390 | Gm25749 | 0.0000 | No |
| 23391 | Gm25750 | 0.0000 | No |
| 23392 | Gm25753 | 0.0000 | No |
| 23393 | Gm25754 | 0.0000 | No |
| 23394 | Gm25755 | 0.0000 | No |
| 23395 | Gm25756 | 0.0000 | No |
| 23396 | Gm25757 | 0.0000 | No |
| 23397 | Gm25758 | 0.0000 | No |
| 23398 | Gm25759 | 0.0000 | No |
| 23399 | Gm25760 | 0.0000 | No |
| 23400 | Gm25761 | 0.0000 | No |
| 23401 | Gm25762 | 0.0000 | No |
| 23402 | Gm25763 | 0.0000 | No |
| 23403 | Gm25764 | 0.0000 | No |
| 23404 | Gm25765 | 0.0000 | No |
| 23405 | Gm25766 | 0.0000 | No |
| 23406 | Gm25767 | 0.0000 | No |
| 23407 | Gm25768 | 0.0000 | No |
| 23408 | Gm25769 | 0.0000 | No |
| 23409 | Gm25770 | 0.0000 | No |
| 23410 | Gm25771 | 0.0000 | No |
| 23411 | Gm25772 | 0.0000 | No |

|       |         |        |    |
|-------|---------|--------|----|
| 23412 | Gm25773 | 0.0000 | No |
| 23413 | Gm25774 | 0.0000 | No |
| 23414 | Gm25775 | 0.0000 | No |
| 23415 | Gm25777 | 0.0000 | No |
| 23416 | Gm25778 | 0.0000 | No |
| 23417 | Gm25779 | 0.0000 | No |
| 23418 | Gm25780 | 0.0000 | No |
| 23419 | Gm25781 | 0.0000 | No |
| 23420 | Gm25782 | 0.0000 | No |
| 23421 | Gm25783 | 0.0000 | No |
| 23422 | Gm25784 | 0.0000 | No |
| 23423 | Gm25785 | 0.0000 | No |
| 23424 | Gm25787 | 0.0000 | No |
| 23425 | Gm25789 | 0.0000 | No |
| 23426 | Gm25790 | 0.0000 | No |
| 23427 | Gm25791 | 0.0000 | No |
| 23428 | Gm25792 | 0.0000 | No |
| 23429 | Gm25793 | 0.0000 | No |
| 23430 | Gm25794 | 0.0000 | No |
| 23431 | Gm25796 | 0.0000 | No |
| 23432 | Gm25797 | 0.0000 | No |
| 23433 | Gm25798 | 0.0000 | No |
| 23434 | Gm25799 | 0.0000 | No |
| 23435 | Gm25800 | 0.0000 | No |
| 23436 | Gm25801 | 0.0000 | No |
| 23437 | Gm25802 | 0.0000 | No |
| 23438 | Gm25803 | 0.0000 | No |
| 23439 | Gm25804 | 0.0000 | No |
| 23440 | Gm25805 | 0.0000 | No |
| 23441 | Gm25806 | 0.0000 | No |
| 23442 | Gm25807 | 0.0000 | No |
| 23443 | Gm25808 | 0.0000 | No |
| 23444 | Gm25809 | 0.0000 | No |
| 23445 | Gm25810 | 0.0000 | No |
| 23446 | Gm25811 | 0.0000 | No |
| 23447 | Gm25812 | 0.0000 | No |
| 23448 | Gm25814 | 0.0000 | No |
| 23449 | Gm25815 | 0.0000 | No |
| 23450 | Gm25816 | 0.0000 | No |
| 23451 | Gm25817 | 0.0000 | No |
| 23452 | Gm25818 | 0.0000 | No |
| 23453 | Gm25819 | 0.0000 | No |
| 23454 | Gm25820 | 0.0000 | No |
| 23455 | Gm25821 | 0.0000 | No |
| 23456 | Gm25823 | 0.0000 | No |
| 23457 | Gm25824 | 0.0000 | No |

|       |         |        |    |
|-------|---------|--------|----|
| 23458 | Gm25825 | 0.0000 | No |
| 23459 | Gm25826 | 0.0000 | No |
| 23460 | Gm25827 | 0.0000 | No |
| 23461 | Gm25828 | 0.0000 | No |
| 23462 | Gm25829 | 0.0000 | No |
| 23463 | Gm25830 | 0.0000 | No |
| 23464 | Gm25831 | 0.0000 | No |
| 23465 | Gm25832 | 0.0000 | No |
| 23466 | Gm25833 | 0.0000 | No |
| 23467 | Gm25834 | 0.0000 | No |
| 23468 | Gm25835 | 0.0000 | No |
| 23469 | Gm25836 | 0.0000 | No |
| 23470 | Gm25837 | 0.0000 | No |
| 23471 | Gm25838 | 0.0000 | No |
| 23472 | Gm25839 | 0.0000 | No |
| 23473 | Gm25840 | 0.0000 | No |
| 23474 | Gm25845 | 0.0000 | No |
| 23475 | Gm25847 | 0.0000 | No |
| 23476 | Gm25848 | 0.0000 | No |
| 23477 | Gm25851 | 0.0000 | No |
| 23478 | Gm25852 | 0.0000 | No |
| 23479 | Gm25853 | 0.0000 | No |
| 23480 | Gm25854 | 0.0000 | No |
| 23481 | Gm25855 | 0.0000 | No |
| 23482 | Gm25856 | 0.0000 | No |
| 23483 | Gm25857 | 0.0000 | No |
| 23484 | Gm25859 | 0.0000 | No |
| 23485 | Gm25860 | 0.0000 | No |
| 23486 | Gm25862 | 0.0000 | No |
| 23487 | Gm25863 | 0.0000 | No |
| 23488 | Gm25864 | 0.0000 | No |
| 23489 | Gm25865 | 0.0000 | No |
| 23490 | Gm25868 | 0.0000 | No |
| 23491 | Gm25869 | 0.0000 | No |
| 23492 | Gm25870 | 0.0000 | No |
| 23493 | Gm25871 | 0.0000 | No |
| 23494 | Gm25872 | 0.0000 | No |
| 23495 | Gm25873 | 0.0000 | No |
| 23496 | Gm25874 | 0.0000 | No |
| 23497 | Gm25875 | 0.0000 | No |
| 23498 | Gm25876 | 0.0000 | No |
| 23499 | Gm25877 | 0.0000 | No |
| 23500 | Gm25878 | 0.0000 | No |
| 23501 | Gm25879 | 0.0000 | No |
| 23502 | Gm25880 | 0.0000 | No |
| 23503 | Gm25881 | 0.0000 | No |

|       |         |        |    |
|-------|---------|--------|----|
| 23504 | Gm25882 | 0.0000 | No |
| 23505 | Gm25883 | 0.0000 | No |
| 23506 | Gm25884 | 0.0000 | No |
| 23507 | Gm25888 | 0.0000 | No |
| 23508 | Gm25889 | 0.0000 | No |
| 23509 | Gm25890 | 0.0000 | No |
| 23510 | Gm25891 | 0.0000 | No |
| 23511 | Gm25892 | 0.0000 | No |
| 23512 | Gm25894 | 0.0000 | No |
| 23513 | Gm25895 | 0.0000 | No |
| 23514 | Gm25897 | 0.0000 | No |
| 23515 | Gm25898 | 0.0000 | No |
| 23516 | Gm25899 | 0.0000 | No |
| 23517 | Gm25902 | 0.0000 | No |
| 23518 | Gm25903 | 0.0000 | No |
| 23519 | Gm25904 | 0.0000 | No |
| 23520 | Gm25905 | 0.0000 | No |
| 23521 | Gm25906 | 0.0000 | No |
| 23522 | Gm25907 | 0.0000 | No |
| 23523 | Gm25909 | 0.0000 | No |
| 23524 | Gm25911 | 0.0000 | No |
| 23525 | Gm25913 | 0.0000 | No |
| 23526 | Gm25914 | 0.0000 | No |
| 23527 | Gm25916 | 0.0000 | No |
| 23528 | Gm25917 | 0.0000 | No |
| 23529 | Gm25918 | 0.0000 | No |
| 23530 | Gm25919 | 0.0000 | No |
| 23531 | Gm25920 | 0.0000 | No |
| 23532 | Gm25921 | 0.0000 | No |
| 23533 | Gm25924 | 0.0000 | No |
| 23534 | Gm25925 | 0.0000 | No |
| 23535 | Gm25926 | 0.0000 | No |
| 23536 | Gm25927 | 0.0000 | No |
| 23537 | Gm25929 | 0.0000 | No |
| 23538 | Gm25930 | 0.0000 | No |
| 23539 | Gm25931 | 0.0000 | No |
| 23540 | Gm25934 | 0.0000 | No |
| 23541 | Gm25935 | 0.0000 | No |
| 23542 | Gm25936 | 0.0000 | No |
| 23543 | Gm25937 | 0.0000 | No |
| 23544 | Gm25938 | 0.0000 | No |
| 23545 | Gm25939 | 0.0000 | No |
| 23546 | Gm25942 | 0.0000 | No |
| 23547 | Gm25943 | 0.0000 | No |
| 23548 | Gm25944 | 0.0000 | No |
| 23549 | Gm25945 | 0.0000 | No |



|       |         |        |    |
|-------|---------|--------|----|
| 23550 | Gm25947 | 0.0000 | No |
| 23551 | Gm25948 | 0.0000 | No |
| 23552 | Gm25949 | 0.0000 | No |
| 23553 | Gm25950 | 0.0000 | No |
| 23554 | Gm25951 | 0.0000 | No |
| 23555 | Gm25952 | 0.0000 | No |
| 23556 | Gm25953 | 0.0000 | No |
| 23557 | Gm25956 | 0.0000 | No |
| 23558 | Gm25958 | 0.0000 | No |
| 23559 | Gm25959 | 0.0000 | No |
| 23560 | Gm25960 | 0.0000 | No |
| 23561 | Gm25962 | 0.0000 | No |
| 23562 | Gm25964 | 0.0000 | No |
| 23563 | Gm25967 | 0.0000 | No |
| 23564 | Gm25968 | 0.0000 | No |
| 23565 | Gm25969 | 0.0000 | No |
| 23566 | Gm25970 | 0.0000 | No |
| 23567 | Gm25971 | 0.0000 | No |
| 23568 | Gm25972 | 0.0000 | No |
| 23569 | Gm25973 | 0.0000 | No |
| 23570 | Gm25975 | 0.0000 | No |
| 23571 | Gm25976 | 0.0000 | No |
| 23572 | Gm25977 | 0.0000 | No |
| 23573 | Gm25978 | 0.0000 | No |
| 23574 | Gm25980 | 0.0000 | No |
| 23575 | Gm25981 | 0.0000 | No |
| 23576 | Gm25984 | 0.0000 | No |
| 23577 | Gm25986 | 0.0000 | No |
| 23578 | Gm25987 | 0.0000 | No |
| 23579 | Gm25988 | 0.0000 | No |
| 23580 | Gm25990 | 0.0000 | No |
| 23581 | Gm25991 | 0.0000 | No |
| 23582 | Gm25992 | 0.0000 | No |
| 23583 | Gm25993 | 0.0000 | No |
| 23584 | Gm25994 | 0.0000 | No |
| 23585 | Gm25996 | 0.0000 | No |
| 23586 | Gm25998 | 0.0000 | No |
| 23587 | Gm25999 | 0.0000 | No |
| 23588 | Gm26000 | 0.0000 | No |
| 23589 | Gm26001 | 0.0000 | No |
| 23590 | Gm26002 | 0.0000 | No |
| 23591 | Gm26003 | 0.0000 | No |
| 23592 | Gm26005 | 0.0000 | No |
| 23593 | Gm26006 | 0.0000 | No |
| 23594 | Gm26007 | 0.0000 | No |
| 23595 | Gm26008 | 0.0000 | No |

|       |         |        |    |
|-------|---------|--------|----|
| 23596 | Gm26011 | 0.0000 | No |
| 23597 | Gm26012 | 0.0000 | No |
| 23598 | Gm26013 | 0.0000 | No |
| 23599 | Gm26014 | 0.0000 | No |
| 23600 | Gm26015 | 0.0000 | No |
| 23601 | Gm26016 | 0.0000 | No |
| 23602 | Gm26017 | 0.0000 | No |
| 23603 | Gm26018 | 0.0000 | No |
| 23604 | Gm26019 | 0.0000 | No |
| 23605 | Gm2602  | 0.0000 | No |
| 23606 | Gm26020 | 0.0000 | No |
| 23607 | Gm26021 | 0.0000 | No |
| 23608 | Gm26022 | 0.0000 | No |
| 23609 | Gm26023 | 0.0000 | No |
| 23610 | Gm26024 | 0.0000 | No |
| 23611 | Gm26025 | 0.0000 | No |
| 23612 | Gm26026 | 0.0000 | No |
| 23613 | Gm26027 | 0.0000 | No |
| 23614 | Gm26028 | 0.0000 | No |
| 23615 | Gm26029 | 0.0000 | No |
| 23616 | Gm26032 | 0.0000 | No |
| 23617 | Gm26034 | 0.0000 | No |
| 23618 | Gm26035 | 0.0000 | No |
| 23619 | Gm26036 | 0.0000 | No |
| 23620 | Gm26038 | 0.0000 | No |
| 23621 | Gm26039 | 0.0000 | No |
| 23622 | Gm26040 | 0.0000 | No |
| 23623 | Gm26042 | 0.0000 | No |
| 23624 | Gm26043 | 0.0000 | No |
| 23625 | Gm26044 | 0.0000 | No |
| 23626 | Gm26045 | 0.0000 | No |
| 23627 | Gm26046 | 0.0000 | No |
| 23628 | Gm26047 | 0.0000 | No |
| 23629 | Gm26048 | 0.0000 | No |
| 23630 | Gm26049 | 0.0000 | No |
| 23631 | Gm26050 | 0.0000 | No |
| 23632 | Gm26051 | 0.0000 | No |
| 23633 | Gm26052 | 0.0000 | No |
| 23634 | Gm26054 | 0.0000 | No |
| 23635 | Gm26055 | 0.0000 | No |
| 23636 | Gm26056 | 0.0000 | No |
| 23637 | Gm26057 | 0.0000 | No |
| 23638 | Gm26058 | 0.0000 | No |
| 23639 | Gm26059 | 0.0000 | No |
| 23640 | Gm2606  | 0.0000 | No |
| 23641 | Gm26060 | 0.0000 | No |

|       |         |        |    |
|-------|---------|--------|----|
| 23642 | Gm26061 | 0.0000 | No |
| 23643 | Gm26062 | 0.0000 | No |
| 23644 | Gm26063 | 0.0000 | No |
| 23645 | Gm26064 | 0.0000 | No |
| 23646 | Gm26065 | 0.0000 | No |
| 23647 | Gm26066 | 0.0000 | No |
| 23648 | Gm26067 | 0.0000 | No |
| 23649 | Gm26069 | 0.0000 | No |
| 23650 | Gm26070 | 0.0000 | No |
| 23651 | Gm26071 | 0.0000 | No |
| 23652 | Gm26072 | 0.0000 | No |
| 23653 | Gm26073 | 0.0000 | No |
| 23654 | Gm26074 | 0.0000 | No |
| 23655 | Gm26075 | 0.0000 | No |
| 23656 | Gm26076 | 0.0000 | No |
| 23657 | Gm26077 | 0.0000 | No |
| 23658 | Gm26078 | 0.0000 | No |
| 23659 | Gm26079 | 0.0000 | No |
| 23660 | Gm26080 | 0.0000 | No |
| 23661 | Gm26081 | 0.0000 | No |
| 23662 | Gm26082 | 0.0000 | No |
| 23663 | Gm26083 | 0.0000 | No |
| 23664 | Gm26084 | 0.0000 | No |
| 23665 | Gm26085 | 0.0000 | No |
| 23666 | Gm26086 | 0.0000 | No |
| 23667 | Gm26087 | 0.0000 | No |
| 23668 | Gm26088 | 0.0000 | No |
| 23669 | Gm26090 | 0.0000 | No |
| 23670 | Gm26091 | 0.0000 | No |
| 23671 | Gm26092 | 0.0000 | No |
| 23672 | Gm26095 | 0.0000 | No |
| 23673 | Gm26096 | 0.0000 | No |
| 23674 | Gm26097 | 0.0000 | No |
| 23675 | Gm26099 | 0.0000 | No |
| 23676 | Gm26100 | 0.0000 | No |
| 23677 | Gm26101 | 0.0000 | No |
| 23678 | Gm26102 | 0.0000 | No |
| 23679 | Gm26103 | 0.0000 | No |
| 23680 | Gm26104 | 0.0000 | No |
| 23681 | Gm26105 | 0.0000 | No |
| 23682 | Gm26106 | 0.0000 | No |
| 23683 | Gm26107 | 0.0000 | No |
| 23684 | Gm26108 | 0.0000 | No |
| 23685 | Gm26109 | 0.0000 | No |
| 23686 | Gm26110 | 0.0000 | No |
| 23687 | Gm26111 | 0.0000 | No |

|       |         |        |    |
|-------|---------|--------|----|
| 23688 | Gm26113 | 0.0000 | No |
| 23689 | Gm26115 | 0.0000 | No |
| 23690 | Gm26116 | 0.0000 | No |
| 23691 | Gm26117 | 0.0000 | No |
| 23692 | Gm26119 | 0.0000 | No |
| 23693 | Gm26121 | 0.0000 | No |
| 23694 | Gm26122 | 0.0000 | No |
| 23695 | Gm26123 | 0.0000 | No |
| 23696 | Gm26124 | 0.0000 | No |
| 23697 | Gm26125 | 0.0000 | No |
| 23698 | Gm26126 | 0.0000 | No |
| 23699 | Gm26127 | 0.0000 | No |
| 23700 | Gm26128 | 0.0000 | No |
| 23701 | Gm26129 | 0.0000 | No |
| 23702 | Gm26130 | 0.0000 | No |
| 23703 | Gm26132 | 0.0000 | No |
| 23704 | Gm26133 | 0.0000 | No |
| 23705 | Gm26134 | 0.0000 | No |
| 23706 | Gm26135 | 0.0000 | No |
| 23707 | Gm26137 | 0.0000 | No |
| 23708 | Gm26138 | 0.0000 | No |
| 23709 | Gm26139 | 0.0000 | No |
| 23710 | Gm26140 | 0.0000 | No |
| 23711 | Gm26141 | 0.0000 | No |
| 23712 | Gm26143 | 0.0000 | No |
| 23713 | Gm26144 | 0.0000 | No |
| 23714 | Gm26145 | 0.0000 | No |
| 23715 | Gm26146 | 0.0000 | No |
| 23716 | Gm26148 | 0.0000 | No |
| 23717 | Gm26149 | 0.0000 | No |
| 23718 | Gm26150 | 0.0000 | No |
| 23719 | Gm26151 | 0.0000 | No |
| 23720 | Gm26153 | 0.0000 | No |
| 23721 | Gm26154 | 0.0000 | No |
| 23722 | Gm26156 | 0.0000 | No |
| 23723 | Gm26158 | 0.0000 | No |
| 23724 | Gm26159 | 0.0000 | No |
| 23725 | Gm26160 | 0.0000 | No |
| 23726 | Gm26162 | 0.0000 | No |
| 23727 | Gm26163 | 0.0000 | No |
| 23728 | Gm26164 | 0.0000 | No |
| 23729 | Gm26165 | 0.0000 | No |
| 23730 | Gm26166 | 0.0000 | No |
| 23731 | Gm26167 | 0.0000 | No |
| 23732 | Gm26168 | 0.0000 | No |
| 23733 | Gm26169 | 0.0000 | No |

|       |         |        |    |
|-------|---------|--------|----|
| 23734 | Gm26170 | 0.0000 | No |
| 23735 | Gm26172 | 0.0000 | No |
| 23736 | Gm26174 | 0.0000 | No |
| 23737 | Gm26175 | 0.0000 | No |
| 23738 | Gm26176 | 0.0000 | No |
| 23739 | Gm26177 | 0.0000 | No |
| 23740 | Gm26178 | 0.0000 | No |
| 23741 | Gm26179 | 0.0000 | No |
| 23742 | Gm26180 | 0.0000 | No |
| 23743 | Gm26181 | 0.0000 | No |
| 23744 | Gm26182 | 0.0000 | No |
| 23745 | Gm26183 | 0.0000 | No |
| 23746 | Gm26184 | 0.0000 | No |
| 23747 | Gm26185 | 0.0000 | No |
| 23748 | Gm26186 | 0.0000 | No |
| 23749 | Gm26187 | 0.0000 | No |
| 23750 | Gm26188 | 0.0000 | No |
| 23751 | Gm26189 | 0.0000 | No |
| 23752 | Gm2619  | 0.0000 | No |
| 23753 | Gm26190 | 0.0000 | No |
| 23754 | Gm26194 | 0.0000 | No |
| 23755 | Gm26195 | 0.0000 | No |
| 23756 | Gm26200 | 0.0000 | No |
| 23757 | Gm26201 | 0.0000 | No |
| 23758 | Gm26202 | 0.0000 | No |
| 23759 | Gm26203 | 0.0000 | No |
| 23760 | Gm26204 | 0.0000 | No |
| 23761 | Gm26205 | 0.0000 | No |
| 23762 | Gm26206 | 0.0000 | No |
| 23763 | Gm26207 | 0.0000 | No |
| 23764 | Gm26208 | 0.0000 | No |
| 23765 | Gm26209 | 0.0000 | No |
| 23766 | Gm26210 | 0.0000 | No |
| 23767 | Gm26211 | 0.0000 | No |
| 23768 | Gm26214 | 0.0000 | No |
| 23769 | Gm26215 | 0.0000 | No |
| 23770 | Gm26217 | 0.0000 | No |
| 23771 | Gm26219 | 0.0000 | No |
| 23772 | Gm2622  | 0.0000 | No |
| 23773 | Gm26220 | 0.0000 | No |
| 23774 | Gm26224 | 0.0000 | No |
| 23775 | Gm26225 | 0.0000 | No |
| 23776 | Gm26226 | 0.0000 | No |
| 23777 | Gm26227 | 0.0000 | No |
| 23778 | Gm26228 | 0.0000 | No |
| 23779 | Gm26229 | 0.0000 | No |

|       |         |        |    |
|-------|---------|--------|----|
| 23780 | Gm2623  | 0.0000 | No |
| 23781 | Gm26230 | 0.0000 | No |
| 23782 | Gm26231 | 0.0000 | No |
| 23783 | Gm26232 | 0.0000 | No |
| 23784 | Gm26233 | 0.0000 | No |
| 23785 | Gm26235 | 0.0000 | No |
| 23786 | Gm26237 | 0.0000 | No |
| 23787 | Gm26238 | 0.0000 | No |
| 23788 | Gm26239 | 0.0000 | No |
| 23789 | Gm26240 | 0.0000 | No |
| 23790 | Gm26241 | 0.0000 | No |
| 23791 | Gm26243 | 0.0000 | No |
| 23792 | Gm26244 | 0.0000 | No |
| 23793 | Gm26245 | 0.0000 | No |
| 23794 | Gm26246 | 0.0000 | No |
| 23795 | Gm26247 | 0.0000 | No |
| 23796 | Gm26248 | 0.0000 | No |
| 23797 | Gm26249 | 0.0000 | No |
| 23798 | Gm26250 | 0.0000 | No |
| 23799 | Gm26252 | 0.0000 | No |
| 23800 | Gm26254 | 0.0000 | No |
| 23801 | Gm26255 | 0.0000 | No |
| 23802 | Gm26256 | 0.0000 | No |
| 23803 | Gm26257 | 0.0000 | No |
| 23804 | Gm26263 | 0.0000 | No |
| 23805 | Gm26264 | 0.0000 | No |
| 23806 | Gm26265 | 0.0000 | No |
| 23807 | Gm26268 | 0.0000 | No |
| 23808 | Gm26269 | 0.0000 | No |
| 23809 | Gm26270 | 0.0000 | No |
| 23810 | Gm26271 | 0.0000 | No |
| 23811 | Gm26272 | 0.0000 | No |
| 23812 | Gm26273 | 0.0000 | No |
| 23813 | Gm26274 | 0.0000 | No |
| 23814 | Gm26275 | 0.0000 | No |
| 23815 | Gm26276 | 0.0000 | No |
| 23816 | Gm26277 | 0.0000 | No |
| 23817 | Gm26278 | 0.0000 | No |
| 23818 | Gm26283 | 0.0000 | No |
| 23819 | Gm26284 | 0.0000 | No |
| 23820 | Gm26285 | 0.0000 | No |
| 23821 | Gm26286 | 0.0000 | No |
| 23822 | Gm26287 | 0.0000 | No |
| 23823 | Gm26288 | 0.0000 | No |
| 23824 | Gm26289 | 0.0000 | No |
| 23825 | Gm26290 | 0.0000 | No |

|       |         |        |    |
|-------|---------|--------|----|
| 23826 | Gm26291 | 0.0000 | No |
| 23827 | Gm26293 | 0.0000 | No |
| 23828 | Gm26295 | 0.0000 | No |
| 23829 | Gm26296 | 0.0000 | No |
| 23830 | Gm26297 | 0.0000 | No |
| 23831 | Gm26298 | 0.0000 | No |
| 23832 | Gm26300 | 0.0000 | No |
| 23833 | Gm26302 | 0.0000 | No |
| 23834 | Gm26303 | 0.0000 | No |
| 23835 | Gm26307 | 0.0000 | No |
| 23836 | Gm26308 | 0.0000 | No |
| 23837 | Gm26310 | 0.0000 | No |
| 23838 | Gm26311 | 0.0000 | No |
| 23839 | Gm26312 | 0.0000 | No |
| 23840 | Gm26313 | 0.0000 | No |
| 23841 | Gm26314 | 0.0000 | No |
| 23842 | Gm26315 | 0.0000 | No |
| 23843 | Gm26317 | 0.0000 | No |
| 23844 | Gm26320 | 0.0000 | No |
| 23845 | Gm26321 | 0.0000 | No |
| 23846 | Gm26323 | 0.0000 | No |
| 23847 | Gm26324 | 0.0000 | No |
| 23848 | Gm26325 | 0.0000 | No |
| 23849 | Gm26326 | 0.0000 | No |
| 23850 | Gm26327 | 0.0000 | No |
| 23851 | Gm26328 | 0.0000 | No |
| 23852 | Gm26329 | 0.0000 | No |
| 23853 | Gm26330 | 0.0000 | No |
| 23854 | Gm26331 | 0.0000 | No |
| 23855 | Gm26332 | 0.0000 | No |
| 23856 | Gm26334 | 0.0000 | No |
| 23857 | Gm26335 | 0.0000 | No |
| 23858 | Gm26336 | 0.0000 | No |
| 23859 | Gm26337 | 0.0000 | No |
| 23860 | Gm26338 | 0.0000 | No |
| 23861 | Gm26339 | 0.0000 | No |
| 23862 | Gm26340 | 0.0000 | No |
| 23863 | Gm26341 | 0.0000 | No |
| 23864 | Gm26342 | 0.0000 | No |
| 23865 | Gm26344 | 0.0000 | No |
| 23866 | Gm26345 | 0.0000 | No |
| 23867 | Gm26347 | 0.0000 | No |
| 23868 | Gm26348 | 0.0000 | No |
| 23869 | Gm26349 | 0.0000 | No |
| 23870 | Gm26350 | 0.0000 | No |
| 23871 | Gm26351 | 0.0000 | No |

|       |         |        |    |
|-------|---------|--------|----|
| 23872 | Gm26352 | 0.0000 | No |
| 23873 | Gm26353 | 0.0000 | No |
| 23874 | Gm26354 | 0.0000 | No |
| 23875 | Gm26355 | 0.0000 | No |
| 23876 | Gm26356 | 0.0000 | No |
| 23877 | Gm26357 | 0.0000 | No |
| 23878 | Gm26359 | 0.0000 | No |
| 23879 | Gm26360 | 0.0000 | No |
| 23880 | Gm26361 | 0.0000 | No |
| 23881 | Gm26362 | 0.0000 | No |
| 23882 | Gm26365 | 0.0000 | No |
| 23883 | Gm26366 | 0.0000 | No |
| 23884 | Gm26367 | 0.0000 | No |
| 23885 | Gm26368 | 0.0000 | No |
| 23886 | Gm26369 | 0.0000 | No |
| 23887 | Gm26371 | 0.0000 | No |
| 23888 | Gm26372 | 0.0000 | No |
| 23889 | Gm26373 | 0.0000 | No |
| 23890 | Gm26374 | 0.0000 | No |
| 23891 | Gm26375 | 0.0000 | No |
| 23892 | Gm26376 | 0.0000 | No |
| 23893 | Gm26377 | 0.0000 | No |
| 23894 | Gm26378 | 0.0000 | No |
| 23895 | Gm26379 | 0.0000 | No |
| 23896 | Gm26384 | 0.0000 | No |
| 23897 | Gm26386 | 0.0000 | No |
| 23898 | Gm26387 | 0.0000 | No |
| 23899 | Gm26389 | 0.0000 | No |
| 23900 | Gm2639  | 0.0000 | No |
| 23901 | Gm26390 | 0.0000 | No |
| 23902 | Gm26392 | 0.0000 | No |
| 23903 | Gm26393 | 0.0000 | No |
| 23904 | Gm26394 | 0.0000 | No |
| 23905 | Gm26395 | 0.0000 | No |
| 23906 | Gm26397 | 0.0000 | No |
| 23907 | Gm26398 | 0.0000 | No |
| 23908 | Gm26399 | 0.0000 | No |
| 23909 | Gm26401 | 0.0000 | No |
| 23910 | Gm26402 | 0.0000 | No |
| 23911 | Gm26403 | 0.0000 | No |
| 23912 | Gm26404 | 0.0000 | No |
| 23913 | Gm26406 | 0.0000 | No |
| 23914 | Gm26407 | 0.0000 | No |
| 23915 | Gm26408 | 0.0000 | No |
| 23916 | Gm26409 | 0.0000 | No |
| 23917 | Gm26410 | 0.0000 | No |



|       |         |        |    |
|-------|---------|--------|----|
| 23918 | Gm26414 | 0.0000 | No |
| 23919 | Gm26415 | 0.0000 | No |
| 23920 | Gm26416 | 0.0000 | No |
| 23921 | Gm26417 | 0.0000 | No |
| 23922 | Gm26418 | 0.0000 | No |
| 23923 | Gm26419 | 0.0000 | No |
| 23924 | Gm26420 | 0.0000 | No |
| 23925 | Gm26421 | 0.0000 | No |
| 23926 | Gm26423 | 0.0000 | No |
| 23927 | Gm26424 | 0.0000 | No |
| 23928 | Gm26425 | 0.0000 | No |
| 23929 | Gm26426 | 0.0000 | No |
| 23930 | Gm26429 | 0.0000 | No |
| 23931 | Gm26430 | 0.0000 | No |
| 23932 | Gm26431 | 0.0000 | No |
| 23933 | Gm26432 | 0.0000 | No |
| 23934 | Gm26433 | 0.0000 | No |
| 23935 | Gm26434 | 0.0000 | No |
| 23936 | Gm26435 | 0.0000 | No |
| 23937 | Gm26436 | 0.0000 | No |
| 23938 | Gm26437 | 0.0000 | No |
| 23939 | Gm26438 | 0.0000 | No |
| 23940 | Gm26439 | 0.0000 | No |
| 23941 | Gm26440 | 0.0000 | No |
| 23942 | Gm26442 | 0.0000 | No |
| 23943 | Gm26443 | 0.0000 | No |
| 23944 | Gm26444 | 0.0000 | No |
| 23945 | Gm26445 | 0.0000 | No |
| 23946 | Gm26446 | 0.0000 | No |
| 23947 | Gm26447 | 0.0000 | No |
| 23948 | Gm26448 | 0.0000 | No |
| 23949 | Gm26449 | 0.0000 | No |
| 23950 | Gm26454 | 0.0000 | No |
| 23951 | Gm26455 | 0.0000 | No |
| 23952 | Gm26456 | 0.0000 | No |
| 23953 | Gm26457 | 0.0000 | No |
| 23954 | Gm26460 | 0.0000 | No |
| 23955 | Gm26461 | 0.0000 | No |
| 23956 | Gm26463 | 0.0000 | No |
| 23957 | Gm26464 | 0.0000 | No |
| 23958 | Gm26465 | 0.0000 | No |
| 23959 | Gm26466 | 0.0000 | No |
| 23960 | Gm26467 | 0.0000 | No |
| 23961 | Gm26468 | 0.0000 | No |
| 23962 | Gm26469 | 0.0000 | No |
| 23963 | Gm26472 | 0.0000 | No |

|       |         |        |    |
|-------|---------|--------|----|
| 23964 | Gm26473 | 0.0000 | No |
| 23965 | Gm26474 | 0.0000 | No |
| 23966 | Gm26475 | 0.0000 | No |
| 23967 | Gm26476 | 0.0000 | No |
| 23968 | Gm26477 | 0.0000 | No |
| 23969 | Gm26478 | 0.0000 | No |
| 23970 | Gm26482 | 0.0000 | No |
| 23971 | Gm26483 | 0.0000 | No |
| 23972 | Gm26484 | 0.0000 | No |
| 23973 | Gm26485 | 0.0000 | No |
| 23974 | Gm26487 | 0.0000 | No |
| 23975 | Gm26488 | 0.0000 | No |
| 23976 | Gm26489 | 0.0000 | No |
| 23977 | Gm26490 | 0.0000 | No |
| 23978 | Gm26491 | 0.0000 | No |
| 23979 | Gm26493 | 0.0000 | No |
| 23980 | Gm26494 | 0.0000 | No |
| 23981 | Gm26495 | 0.0000 | No |
| 23982 | Gm26496 | 0.0000 | No |
| 23983 | Gm26497 | 0.0000 | No |
| 23984 | Gm26498 | 0.0000 | No |
| 23985 | Gm26499 | 0.0000 | No |
| 23986 | Gm26500 | 0.0000 | No |
| 23987 | Gm26501 | 0.0000 | No |
| 23988 | Gm26502 | 0.0000 | No |
| 23989 | Gm26504 | 0.0000 | No |
| 23990 | Gm26505 | 0.0000 | No |
| 23991 | Gm26506 | 0.0000 | No |
| 23992 | Gm26507 | 0.0000 | No |
| 23993 | Gm26508 | 0.0000 | No |
| 23994 | Gm26509 | 0.0000 | No |
| 23995 | Gm2651  | 0.0000 | No |
| 23996 | Gm26510 | 0.0000 | No |
| 23997 | Gm26511 | 0.0000 | No |
| 23998 | Gm26512 | 0.0000 | No |
| 23999 | Gm26513 | 0.0000 | No |
| 24000 | Gm26514 | 0.0000 | No |
| 24001 | Gm26515 | 0.0000 | No |
| 24002 | Gm26516 | 0.0000 | No |
| 24003 | Gm26517 | 0.0000 | No |
| 24004 | Gm26518 | 0.0000 | No |
| 24005 | Gm26519 | 0.0000 | No |
| 24006 | Gm26520 | 0.0000 | No |
| 24007 | Gm26521 | 0.0000 | No |
| 24008 | Gm26522 | 0.0000 | No |
| 24009 | Gm26523 | 0.0000 | No |

|       |         |        |    |
|-------|---------|--------|----|
| 24010 | Gm26524 | 0.0000 | No |
| 24011 | Gm26525 | 0.0000 | No |
| 24012 | Gm26526 | 0.0000 | No |
| 24013 | Gm26527 | 0.0000 | No |
| 24014 | Gm26528 | 0.0000 | No |
| 24015 | Gm26530 | 0.0000 | No |
| 24016 | Gm26531 | 0.0000 | No |
| 24017 | Gm26533 | 0.0000 | No |
| 24018 | Gm26534 | 0.0000 | No |
| 24019 | Gm26535 | 0.0000 | No |
| 24020 | Gm26536 | 0.0000 | No |
| 24021 | Gm26537 | 0.0000 | No |
| 24022 | Gm26538 | 0.0000 | No |
| 24023 | Gm26540 | 0.0000 | No |
| 24024 | Gm26542 | 0.0000 | No |
| 24025 | Gm26544 | 0.0000 | No |
| 24026 | Gm26545 | 0.0000 | No |
| 24027 | Gm26546 | 0.0000 | No |
| 24028 | Gm26547 | 0.0000 | No |
| 24029 | Gm26549 | 0.0000 | No |
| 24030 | Gm26552 | 0.0000 | No |
| 24031 | Gm26553 | 0.0000 | No |
| 24032 | Gm26554 | 0.0000 | No |
| 24033 | Gm26556 | 0.0000 | No |
| 24034 | Gm26557 | 0.0000 | No |
| 24035 | Gm26558 | 0.0000 | No |
| 24036 | Gm26560 | 0.0000 | No |
| 24037 | Gm26561 | 0.0000 | No |
| 24038 | Gm26562 | 0.0000 | No |
| 24039 | Gm26563 | 0.0000 | No |
| 24040 | Gm26564 | 0.0000 | No |
| 24041 | Gm26565 | 0.0000 | No |
| 24042 | Gm26566 | 0.0000 | No |
| 24043 | Gm26568 | 0.0000 | No |
| 24044 | Gm26569 | 0.0000 | No |
| 24045 | Gm26570 | 0.0000 | No |
| 24046 | Gm26571 | 0.0000 | No |
| 24047 | Gm26573 | 0.0000 | No |
| 24048 | Gm26574 | 0.0000 | No |
| 24049 | Gm26575 | 0.0000 | No |
| 24050 | Gm26576 | 0.0000 | No |
| 24051 | Gm26578 | 0.0000 | No |
| 24052 | Gm26579 | 0.0000 | No |
| 24053 | Gm26580 | 0.0000 | No |
| 24054 | Gm26581 | 0.0000 | No |
| 24055 | Gm26582 | 0.0000 | No |

|       |         |        |    |
|-------|---------|--------|----|
| 24056 | Gm26584 | 0.0000 | No |
| 24057 | Gm26585 | 0.0000 | No |
| 24058 | Gm26586 | 0.0000 | No |
| 24059 | Gm26587 | 0.0000 | No |
| 24060 | Gm26588 | 0.0000 | No |
| 24061 | Gm26590 | 0.0000 | No |
| 24062 | Gm26592 | 0.0000 | No |
| 24063 | Gm26593 | 0.0000 | No |
| 24064 | Gm26594 | 0.0000 | No |
| 24065 | Gm26595 | 0.0000 | No |
| 24066 | Gm26596 | 0.0000 | No |
| 24067 | Gm26597 | 0.0000 | No |
| 24068 | Gm26599 | 0.0000 | No |
| 24069 | Gm266   | 0.0000 | No |
| 24070 | Gm26601 | 0.0000 | No |
| 24071 | Gm26602 | 0.0000 | No |
| 24072 | Gm26603 | 0.0000 | No |
| 24073 | Gm26604 | 0.0000 | No |
| 24074 | Gm26606 | 0.0000 | No |
| 24075 | Gm26607 | 0.0000 | No |
| 24076 | Gm26608 | 0.0000 | No |
| 24077 | Gm26609 | 0.0000 | No |
| 24078 | Gm26610 | 0.0000 | No |
| 24079 | Gm26611 | 0.0000 | No |
| 24080 | Gm26612 | 0.0000 | No |
| 24081 | Gm26613 | 0.0000 | No |
| 24082 | Gm26615 | 0.0000 | No |
| 24083 | Gm26616 | 0.0000 | No |
| 24084 | Gm26617 | 0.0000 | No |
| 24085 | Gm26619 | 0.0000 | No |
| 24086 | Gm26620 | 0.0000 | No |
| 24087 | Gm26621 | 0.0000 | No |
| 24088 | Gm26622 | 0.0000 | No |
| 24089 | Gm26623 | 0.0000 | No |
| 24090 | Gm26624 | 0.0000 | No |
| 24091 | Gm26625 | 0.0000 | No |
| 24092 | Gm26626 | 0.0000 | No |
| 24093 | Gm26627 | 0.0000 | No |
| 24094 | Gm26628 | 0.0000 | No |
| 24095 | Gm26629 | 0.0000 | No |
| 24096 | Gm2663  | 0.0000 | No |
| 24097 | Gm26630 | 0.0000 | No |
| 24098 | Gm26631 | 0.0000 | No |
| 24099 | Gm26633 | 0.0000 | No |
| 24100 | Gm26635 | 0.0000 | No |
| 24101 | Gm26636 | 0.0000 | No |

|       |         |        |    |
|-------|---------|--------|----|
| 24102 | Gm26637 | 0.0000 | No |
| 24103 | Gm26638 | 0.0000 | No |
| 24104 | Gm26639 | 0.0000 | No |
| 24105 | Gm26640 | 0.0000 | No |
| 24106 | Gm26641 | 0.0000 | No |
| 24107 | Gm26642 | 0.0000 | No |
| 24108 | Gm26643 | 0.0000 | No |
| 24109 | Gm26644 | 0.0000 | No |
| 24110 | Gm26645 | 0.0000 | No |
| 24111 | Gm26646 | 0.0000 | No |
| 24112 | Gm26647 | 0.0000 | No |
| 24113 | Gm26648 | 0.0000 | No |
| 24114 | Gm26649 | 0.0000 | No |
| 24115 | Gm26650 | 0.0000 | No |
| 24116 | Gm26651 | 0.0000 | No |
| 24117 | Gm26652 | 0.0000 | No |
| 24118 | Gm26653 | 0.0000 | No |
| 24119 | Gm26654 | 0.0000 | No |
| 24120 | Gm26656 | 0.0000 | No |
| 24121 | Gm26657 | 0.0000 | No |
| 24122 | Gm26658 | 0.0000 | No |
| 24123 | Gm26659 | 0.0000 | No |
| 24124 | Gm26666 | 0.0000 | No |
| 24125 | Gm26660 | 0.0000 | No |
| 24126 | Gm26661 | 0.0000 | No |
| 24127 | Gm26662 | 0.0000 | No |
| 24128 | Gm26663 | 0.0000 | No |
| 24129 | Gm26664 | 0.0000 | No |
| 24130 | Gm26665 | 0.0000 | No |
| 24131 | Gm26666 | 0.0000 | No |
| 24132 | Gm26668 | 0.0000 | No |
| 24133 | Gm26669 | 0.0000 | No |
| 24134 | Gm26670 | 0.0000 | No |
| 24135 | Gm26671 | 0.0000 | No |
| 24136 | Gm26672 | 0.0000 | No |
| 24137 | Gm26673 | 0.0000 | No |
| 24138 | Gm26674 | 0.0000 | No |
| 24139 | Gm26675 | 0.0000 | No |
| 24140 | Gm26676 | 0.0000 | No |
| 24141 | Gm26677 | 0.0000 | No |
| 24142 | Gm26678 | 0.0000 | No |
| 24143 | Gm26679 | 0.0000 | No |
| 24144 | Gm26680 | 0.0000 | No |
| 24145 | Gm26681 | 0.0000 | No |
| 24146 | Gm26683 | 0.0000 | No |
| 24147 | Gm26684 | 0.0000 | No |

|       |         |        |    |
|-------|---------|--------|----|
| 24148 | Gm26685 | 0.0000 | No |
| 24149 | Gm26686 | 0.0000 | No |
| 24150 | Gm26688 | 0.0000 | No |
| 24151 | Gm26689 | 0.0000 | No |
| 24152 | Gm26690 | 0.0000 | No |
| 24153 | Gm26692 | 0.0000 | No |
| 24154 | Gm26693 | 0.0000 | No |
| 24155 | Gm26694 | 0.0000 | No |
| 24156 | Gm26695 | 0.0000 | No |
| 24157 | Gm26696 | 0.0000 | No |
| 24158 | Gm26697 | 0.0000 | No |
| 24159 | Gm26698 | 0.0000 | No |
| 24160 | Gm26699 | 0.0000 | No |
| 24161 | Gm2670  | 0.0000 | No |
| 24162 | Gm26700 | 0.0000 | No |
| 24163 | Gm26701 | 0.0000 | No |
| 24164 | Gm26702 | 0.0000 | No |
| 24165 | Gm26703 | 0.0000 | No |
| 24166 | Gm26704 | 0.0000 | No |
| 24167 | Gm26706 | 0.0000 | No |
| 24168 | Gm26707 | 0.0000 | No |
| 24169 | Gm26708 | 0.0000 | No |
| 24170 | Gm26709 | 0.0000 | No |
| 24171 | Gm26710 | 0.0000 | No |
| 24172 | Gm26711 | 0.0000 | No |
| 24173 | Gm26712 | 0.0000 | No |
| 24174 | Gm26713 | 0.0000 | No |
| 24175 | Gm26714 | 0.0000 | No |
| 24176 | Gm26715 | 0.0000 | No |
| 24177 | Gm26716 | 0.0000 | No |
| 24178 | Gm26717 | 0.0000 | No |
| 24179 | Gm26718 | 0.0000 | No |
| 24180 | Gm26719 | 0.0000 | No |
| 24181 | Gm26720 | 0.0000 | No |
| 24182 | Gm26721 | 0.0000 | No |
| 24183 | Gm26722 | 0.0000 | No |
| 24184 | Gm26723 | 0.0000 | No |
| 24185 | Gm26724 | 0.0000 | No |
| 24186 | Gm26725 | 0.0000 | No |
| 24187 | Gm26726 | 0.0000 | No |
| 24188 | Gm26727 | 0.0000 | No |
| 24189 | Gm26728 | 0.0000 | No |
| 24190 | Gm26729 | 0.0000 | No |
| 24191 | Gm2673  | 0.0000 | No |
| 24192 | Gm26730 | 0.0000 | No |
| 24193 | Gm26731 | 0.0000 | No |

|       |         |        |    |
|-------|---------|--------|----|
| 24194 | Gm26732 | 0.0000 | No |
| 24195 | Gm26733 | 0.0000 | No |
| 24196 | Gm26734 | 0.0000 | No |
| 24197 | Gm26735 | 0.0000 | No |
| 24198 | Gm26736 | 0.0000 | No |
| 24199 | Gm26737 | 0.0000 | No |
| 24200 | Gm26738 | 0.0000 | No |
| 24201 | Gm26740 | 0.0000 | No |
| 24202 | Gm26741 | 0.0000 | No |
| 24203 | Gm26742 | 0.0000 | No |
| 24204 | Gm26744 | 0.0000 | No |
| 24205 | Gm26745 | 0.0000 | No |
| 24206 | Gm26746 | 0.0000 | No |
| 24207 | Gm26748 | 0.0000 | No |
| 24208 | Gm26749 | 0.0000 | No |
| 24209 | Gm26750 | 0.0000 | No |
| 24210 | Gm26751 | 0.0000 | No |
| 24211 | Gm26752 | 0.0000 | No |
| 24212 | Gm26753 | 0.0000 | No |
| 24213 | Gm26754 | 0.0000 | No |
| 24214 | Gm26756 | 0.0000 | No |
| 24215 | Gm2676  | 0.0000 | No |
| 24216 | Gm26760 | 0.0000 | No |
| 24217 | Gm26761 | 0.0000 | No |
| 24218 | Gm26762 | 0.0000 | No |
| 24219 | Gm26763 | 0.0000 | No |
| 24220 | Gm26764 | 0.0000 | No |
| 24221 | Gm26765 | 0.0000 | No |
| 24222 | Gm26766 | 0.0000 | No |
| 24223 | Gm26767 | 0.0000 | No |
| 24224 | Gm26768 | 0.0000 | No |
| 24225 | Gm26769 | 0.0000 | No |
| 24226 | Gm26770 | 0.0000 | No |
| 24227 | Gm26771 | 0.0000 | No |
| 24228 | Gm26772 | 0.0000 | No |
| 24229 | Gm26773 | 0.0000 | No |
| 24230 | Gm26774 | 0.0000 | No |
| 24231 | Gm26775 | 0.0000 | No |
| 24232 | Gm26776 | 0.0000 | No |
| 24233 | Gm26777 | 0.0000 | No |
| 24234 | Gm26778 | 0.0000 | No |
| 24235 | Gm26779 | 0.0000 | No |
| 24236 | Gm26780 | 0.0000 | No |
| 24237 | Gm26781 | 0.0000 | No |
| 24238 | Gm26782 | 0.0000 | No |
| 24239 | Gm26783 | 0.0000 | No |

|       |         |        |    |
|-------|---------|--------|----|
| 24240 | Gm26786 | 0.0000 | No |
| 24241 | Gm26787 | 0.0000 | No |
| 24242 | Gm26788 | 0.0000 | No |
| 24243 | Gm26789 | 0.0000 | No |
| 24244 | Gm26790 | 0.0000 | No |
| 24245 | Gm26791 | 0.0000 | No |
| 24246 | Gm26792 | 0.0000 | No |
| 24247 | Gm26794 | 0.0000 | No |
| 24248 | Gm26796 | 0.0000 | No |
| 24249 | Gm26797 | 0.0000 | No |
| 24250 | Gm26798 | 0.0000 | No |
| 24251 | Gm26799 | 0.0000 | No |
| 24252 | Gm26800 | 0.0000 | No |
| 24253 | Gm26801 | 0.0000 | No |
| 24254 | Gm26803 | 0.0000 | No |
| 24255 | Gm26804 | 0.0000 | No |
| 24256 | Gm26805 | 0.0000 | No |
| 24257 | Gm26806 | 0.0000 | No |
| 24258 | Gm26807 | 0.0000 | No |
| 24259 | Gm26808 | 0.0000 | No |
| 24260 | Gm26809 | 0.0000 | No |
| 24261 | Gm26810 | 0.0000 | No |
| 24262 | Gm26811 | 0.0000 | No |
| 24263 | Gm26813 | 0.0000 | No |
| 24264 | Gm26814 | 0.0000 | No |
| 24265 | Gm26815 | 0.0000 | No |
| 24266 | Gm26816 | 0.0000 | No |
| 24267 | Gm26817 | 0.0000 | No |
| 24268 | Gm26818 | 0.0000 | No |
| 24269 | Gm26819 | 0.0000 | No |
| 24270 | Gm26820 | 0.0000 | No |
| 24271 | Gm26821 | 0.0000 | No |
| 24272 | Gm26822 | 0.0000 | No |
| 24273 | Gm26823 | 0.0000 | No |
| 24274 | Gm26824 | 0.0000 | No |
| 24275 | Gm26825 | 0.0000 | No |
| 24276 | Gm26826 | 0.0000 | No |
| 24277 | Gm26827 | 0.0000 | No |
| 24278 | Gm26828 | 0.0000 | No |
| 24279 | Gm26829 | 0.0000 | No |
| 24280 | Gm26830 | 0.0000 | No |
| 24281 | Gm26831 | 0.0000 | No |
| 24282 | Gm26832 | 0.0000 | No |
| 24283 | Gm26833 | 0.0000 | No |
| 24284 | Gm26835 | 0.0000 | No |
| 24285 | Gm26836 | 0.0000 | No |



|       |         |        |    |
|-------|---------|--------|----|
| 24286 | Gm26837 | 0.0000 | No |
| 24287 | Gm26838 | 0.0000 | No |
| 24288 | Gm26839 | 0.0000 | No |
| 24289 | Gm26840 | 0.0000 | No |
| 24290 | Gm26841 | 0.0000 | No |
| 24291 | Gm26843 | 0.0000 | No |
| 24292 | Gm26846 | 0.0000 | No |
| 24293 | Gm26847 | 0.0000 | No |
| 24294 | Gm26848 | 0.0000 | No |
| 24295 | Gm26849 | 0.0000 | No |
| 24296 | Gm26850 | 0.0000 | No |
| 24297 | Gm26851 | 0.0000 | No |
| 24298 | Gm26852 | 0.0000 | No |
| 24299 | Gm26853 | 0.0000 | No |
| 24300 | Gm26854 | 0.0000 | No |
| 24301 | Gm26856 | 0.0000 | No |
| 24302 | Gm26858 | 0.0000 | No |
| 24303 | Gm26859 | 0.0000 | No |
| 24304 | Gm26860 | 0.0000 | No |
| 24305 | Gm26861 | 0.0000 | No |
| 24306 | Gm26862 | 0.0000 | No |
| 24307 | Gm26863 | 0.0000 | No |
| 24308 | Gm26864 | 0.0000 | No |
| 24309 | Gm26865 | 0.0000 | No |
| 24310 | Gm26866 | 0.0000 | No |
| 24311 | Gm26867 | 0.0000 | No |
| 24312 | Gm26868 | 0.0000 | No |
| 24313 | Gm26869 | 0.0000 | No |
| 24314 | Gm26870 | 0.0000 | No |
| 24315 | Gm26871 | 0.0000 | No |
| 24316 | Gm26872 | 0.0000 | No |
| 24317 | Gm26873 | 0.0000 | No |
| 24318 | Gm26874 | 0.0000 | No |
| 24319 | Gm26875 | 0.0000 | No |
| 24320 | Gm26877 | 0.0000 | No |
| 24321 | Gm26878 | 0.0000 | No |
| 24322 | Gm26879 | 0.0000 | No |
| 24323 | Gm26880 | 0.0000 | No |
| 24324 | Gm26881 | 0.0000 | No |
| 24325 | Gm26882 | 0.0000 | No |
| 24326 | Gm26883 | 0.0000 | No |
| 24327 | Gm26884 | 0.0000 | No |
| 24328 | Gm26885 | 0.0000 | No |
| 24329 | Gm26886 | 0.0000 | No |
| 24330 | Gm26887 | 0.0000 | No |
| 24331 | Gm26888 | 0.0000 | No |

|       |         |        |    |
|-------|---------|--------|----|
| 24332 | Gm26889 | 0.0000 | No |
| 24333 | Gm26890 | 0.0000 | No |
| 24334 | Gm26891 | 0.0000 | No |
| 24335 | Gm26892 | 0.0000 | No |
| 24336 | Gm26893 | 0.0000 | No |
| 24337 | Gm26894 | 0.0000 | No |
| 24338 | Gm26895 | 0.0000 | No |
| 24339 | Gm26896 | 0.0000 | No |
| 24340 | Gm26897 | 0.0000 | No |
| 24341 | Gm26898 | 0.0000 | No |
| 24342 | Gm26899 | 0.0000 | No |
| 24343 | Gm26901 | 0.0000 | No |
| 24344 | Gm26902 | 0.0000 | No |
| 24345 | Gm26903 | 0.0000 | No |
| 24346 | Gm26904 | 0.0000 | No |
| 24347 | Gm26905 | 0.0000 | No |
| 24348 | Gm26906 | 0.0000 | No |
| 24349 | Gm26908 | 0.0000 | No |
| 24350 | Gm26909 | 0.0000 | No |
| 24351 | Gm2691  | 0.0000 | No |
| 24352 | Gm26910 | 0.0000 | No |
| 24353 | Gm26912 | 0.0000 | No |
| 24354 | Gm26913 | 0.0000 | No |
| 24355 | Gm26914 | 0.0000 | No |
| 24356 | Gm26915 | 0.0000 | No |
| 24357 | Gm26916 | 0.0000 | No |
| 24358 | Gm26917 | 0.0000 | No |
| 24359 | Gm26918 | 0.0000 | No |
| 24360 | Gm26922 | 0.0000 | No |
| 24361 | Gm26923 | 0.0000 | No |
| 24362 | Gm26925 | 0.0000 | No |
| 24363 | Gm26927 | 0.0000 | No |
| 24364 | Gm26928 | 0.0000 | No |
| 24365 | Gm26929 | 0.0000 | No |
| 24366 | Gm2693  | 0.0000 | No |
| 24367 | Gm26930 | 0.0000 | No |
| 24368 | Gm26931 | 0.0000 | No |
| 24369 | Gm26933 | 0.0000 | No |
| 24370 | Gm26935 | 0.0000 | No |
| 24371 | Gm26936 | 0.0000 | No |
| 24372 | Gm26937 | 0.0000 | No |
| 24373 | Gm26938 | 0.0000 | No |
| 24374 | Gm26939 | 0.0000 | No |
| 24375 | Gm2694  | 0.0000 | No |
| 24376 | Gm26940 | 0.0000 | No |
| 24377 | Gm26942 | 0.0000 | No |

|       |         |        |    |
|-------|---------|--------|----|
| 24378 | Gm26943 | 0.0000 | No |
| 24379 | Gm26944 | 0.0000 | No |
| 24380 | Gm26945 | 0.0000 | No |
| 24381 | Gm26950 | 0.0000 | No |
| 24382 | Gm26952 | 0.0000 | No |
| 24383 | Gm26956 | 0.0000 | No |
| 24384 | Gm26957 | 0.0000 | No |
| 24385 | Gm26959 | 0.0000 | No |
| 24386 | Gm2696  | 0.0000 | No |
| 24387 | Gm26960 | 0.0000 | No |
| 24388 | Gm26962 | 0.0000 | No |
| 24389 | Gm26963 | 0.0000 | No |
| 24390 | Gm26964 | 0.0000 | No |
| 24391 | Gm26965 | 0.0000 | No |
| 24392 | Gm26967 | 0.0000 | No |
| 24393 | Gm26968 | 0.0000 | No |
| 24394 | Gm26969 | 0.0000 | No |
| 24395 | Gm26970 | 0.0000 | No |
| 24396 | Gm26971 | 0.0000 | No |
| 24397 | Gm26972 | 0.0000 | No |
| 24398 | Gm26973 | 0.0000 | No |
| 24399 | Gm26974 | 0.0000 | No |
| 24400 | Gm26976 | 0.0000 | No |
| 24401 | Gm26977 | 0.0000 | No |
| 24402 | Gm26979 | 0.0000 | No |
| 24403 | Gm26980 | 0.0000 | No |
| 24404 | Gm26981 | 0.0000 | No |
| 24405 | Gm26982 | 0.0000 | No |
| 24406 | Gm26983 | 0.0000 | No |
| 24407 | Gm26984 | 0.0000 | No |
| 24408 | Gm26988 | 0.0000 | No |
| 24409 | Gm26989 | 0.0000 | No |
| 24410 | Gm26991 | 0.0000 | No |
| 24411 | Gm26992 | 0.0000 | No |
| 24412 | Gm26993 | 0.0000 | No |
| 24413 | Gm26994 | 0.0000 | No |
| 24414 | Gm26995 | 0.0000 | No |
| 24415 | Gm26996 | 0.0000 | No |
| 24416 | Gm27000 | 0.0000 | No |
| 24417 | Gm27001 | 0.0000 | No |
| 24418 | Gm27002 | 0.0000 | No |
| 24419 | Gm27003 | 0.0000 | No |
| 24420 | Gm27004 | 0.0000 | No |
| 24421 | Gm27005 | 0.0000 | No |
| 24422 | Gm27006 | 0.0000 | No |
| 24423 | Gm27007 | 0.0000 | No |

|       |         |        |    |
|-------|---------|--------|----|
| 24424 | Gm27008 | 0.0000 | No |
| 24425 | Gm27010 | 0.0000 | No |
| 24426 | Gm27011 | 0.0000 | No |
| 24427 | Gm27013 | 0.0000 | No |
| 24428 | Gm27016 | 0.0000 | No |
| 24429 | Gm27017 | 0.0000 | No |
| 24430 | Gm27018 | 0.0000 | No |
| 24431 | Gm27019 | 0.0000 | No |
| 24432 | Gm27021 | 0.0000 | No |
| 24433 | Gm27022 | 0.0000 | No |
| 24434 | Gm27023 | 0.0000 | No |
| 24435 | Gm27024 | 0.0000 | No |
| 24436 | Gm27025 | 0.0000 | No |
| 24437 | Gm27026 | 0.0000 | No |
| 24438 | Gm27027 | 0.0000 | No |
| 24439 | Gm27028 | 0.0000 | No |
| 24440 | Gm27029 | 0.0000 | No |
| 24441 | Gm27032 | 0.0000 | No |
| 24442 | Gm27033 | 0.0000 | No |
| 24443 | Gm27034 | 0.0000 | No |
| 24444 | Gm27036 | 0.0000 | No |
| 24445 | Gm27037 | 0.0000 | No |
| 24446 | Gm27038 | 0.0000 | No |
| 24447 | Gm27039 | 0.0000 | No |
| 24448 | Gm27042 | 0.0000 | No |
| 24449 | Gm27044 | 0.0000 | No |
| 24450 | Gm27045 | 0.0000 | No |
| 24451 | Gm27046 | 0.0000 | No |
| 24452 | Gm27047 | 0.0000 | No |
| 24453 | Gm27048 | 0.0000 | No |
| 24454 | Gm2709  | 0.0000 | No |
| 24455 | Gm2710  | 0.0000 | No |
| 24456 | Gm27148 | 0.0000 | No |
| 24457 | Gm27149 | 0.0000 | No |
| 24458 | Gm27150 | 0.0000 | No |
| 24459 | Gm27151 | 0.0000 | No |
| 24460 | Gm27152 | 0.0000 | No |
| 24461 | Gm27155 | 0.0000 | No |
| 24462 | Gm27158 | 0.0000 | No |
| 24463 | Gm27159 | 0.0000 | No |
| 24464 | Gm27160 | 0.0000 | No |
| 24465 | Gm27161 | 0.0000 | No |
| 24466 | Gm27164 | 0.0000 | No |
| 24467 | Gm27165 | 0.0000 | No |
| 24468 | Gm27166 | 0.0000 | No |
| 24469 | Gm27167 | 0.0000 | No |

|       |         |        |    |
|-------|---------|--------|----|
| 24470 | Gm27168 | 0.0000 | No |
| 24471 | Gm27169 | 0.0000 | No |
| 24472 | Gm27174 | 0.0000 | No |
| 24473 | Gm27175 | 0.0000 | No |
| 24474 | Gm27176 | 0.0000 | No |
| 24475 | Gm27178 | 0.0000 | No |
| 24476 | Gm27179 | 0.0000 | No |
| 24477 | Gm27184 | 0.0000 | No |
| 24478 | Gm27185 | 0.0000 | No |
| 24479 | Gm27186 | 0.0000 | No |
| 24480 | Gm27189 | 0.0000 | No |
| 24481 | Gm2719  | 0.0000 | No |
| 24482 | Gm27190 | 0.0000 | No |
| 24483 | Gm27191 | 0.0000 | No |
| 24484 | Gm27192 | 0.0000 | No |
| 24485 | Gm27193 | 0.0000 | No |
| 24486 | Gm27194 | 0.0000 | No |
| 24487 | Gm27195 | 0.0000 | No |
| 24488 | Gm27196 | 0.0000 | No |
| 24489 | Gm27197 | 0.0000 | No |
| 24490 | Gm27198 | 0.0000 | No |
| 24491 | Gm27199 | 0.0000 | No |
| 24492 | Gm27200 | 0.0000 | No |
| 24493 | Gm27202 | 0.0000 | No |
| 24494 | Gm27203 | 0.0000 | No |
| 24495 | Gm27204 | 0.0000 | No |
| 24496 | Gm27207 | 0.0000 | No |
| 24497 | Gm27209 | 0.0000 | No |
| 24498 | Gm27210 | 0.0000 | No |
| 24499 | Gm27216 | 0.0000 | No |
| 24500 | Gm27217 | 0.0000 | No |
| 24501 | Gm27218 | 0.0000 | No |
| 24502 | Gm27220 | 0.0000 | No |
| 24503 | Gm27221 | 0.0000 | No |
| 24504 | Gm27222 | 0.0000 | No |
| 24505 | Gm27223 | 0.0000 | No |
| 24506 | Gm27224 | 0.0000 | No |
| 24507 | Gm27225 | 0.0000 | No |
| 24508 | Gm27226 | 0.0000 | No |
| 24509 | Gm27228 | 0.0000 | No |
| 24510 | Gm27230 | 0.0000 | No |
| 24511 | Gm27231 | 0.0000 | No |
| 24512 | Gm27232 | 0.0000 | No |
| 24513 | Gm27233 | 0.0000 | No |
| 24514 | Gm27235 | 0.0000 | No |
| 24515 | Gm27236 | 0.0000 | No |

|       |         |        |    |
|-------|---------|--------|----|
| 24516 | Gm27238 | 0.0000 | No |
| 24517 | Gm27239 | 0.0000 | No |
| 24518 | Gm27240 | 0.0000 | No |
| 24519 | Gm27241 | 0.0000 | No |
| 24520 | Gm27243 | 0.0000 | No |
| 24521 | Gm27244 | 0.0000 | No |
| 24522 | Gm27246 | 0.0000 | No |
| 24523 | Gm27247 | 0.0000 | No |
| 24524 | Gm27248 | 0.0000 | No |
| 24525 | Gm27249 | 0.0000 | No |
| 24526 | Gm27252 | 0.0000 | No |
| 24527 | Gm27253 | 0.0000 | No |
| 24528 | Gm27254 | 0.0000 | No |
| 24529 | Gm27255 | 0.0000 | No |
| 24530 | Gm27263 | 0.0000 | No |
| 24531 | Gm27265 | 0.0000 | No |
| 24532 | Gm27271 | 0.0000 | No |
| 24533 | Gm27275 | 0.0000 | No |
| 24534 | Gm27280 | 0.0000 | No |
| 24535 | Gm27283 | 0.0000 | No |
| 24536 | Gm27284 | 0.0000 | No |
| 24537 | Gm27285 | 0.0000 | No |
| 24538 | Gm27286 | 0.0000 | No |
| 24539 | Gm27288 | 0.0000 | No |
| 24540 | Gm27297 | 0.0000 | No |
| 24541 | Gm27299 | 0.0000 | No |
| 24542 | Gm27300 | 0.0000 | No |
| 24543 | Gm27301 | 0.0000 | No |
| 24544 | Gm27306 | 0.0000 | No |
| 24545 | Gm27308 | 0.0000 | No |
| 24546 | Gm27315 | 0.0000 | No |
| 24547 | Gm27316 | 0.0000 | No |
| 24548 | Gm27317 | 0.0000 | No |
| 24549 | Gm27320 | 0.0000 | No |
| 24550 | Gm27321 | 0.0000 | No |
| 24551 | Gm27322 | 0.0000 | No |
| 24552 | Gm27325 | 0.0000 | No |
| 24553 | Gm27326 | 0.0000 | No |
| 24554 | Gm27330 | 0.0000 | No |
| 24555 | Gm27331 | 0.0000 | No |
| 24556 | Gm27332 | 0.0000 | No |
| 24557 | Gm27335 | 0.0000 | No |
| 24558 | Gm27336 | 0.0000 | No |
| 24559 | Gm27337 | 0.0000 | No |
| 24560 | Gm2734  | 0.0000 | No |
| 24561 | Gm27341 | 0.0000 | No |

|       |         |        |    |
|-------|---------|--------|----|
| 24562 | Gm27343 | 0.0000 | No |
| 24563 | Gm27348 | 0.0000 | No |
| 24564 | Gm2735  | 0.0000 | No |
| 24565 | Gm27350 | 0.0000 | No |
| 24566 | Gm27353 | 0.0000 | No |
| 24567 | Gm27357 | 0.0000 | No |
| 24568 | Gm27359 | 0.0000 | No |
| 24569 | Gm27360 | 0.0000 | No |
| 24570 | Gm27361 | 0.0000 | No |
| 24571 | Gm27365 | 0.0000 | No |
| 24572 | Gm27366 | 0.0000 | No |
| 24573 | Gm27373 | 0.0000 | No |
| 24574 | Gm27374 | 0.0000 | No |
| 24575 | Gm27375 | 0.0000 | No |
| 24576 | Gm27379 | 0.0000 | No |
| 24577 | Gm27383 | 0.0000 | No |
| 24578 | Gm27385 | 0.0000 | No |
| 24579 | Gm27387 | 0.0000 | No |
| 24580 | Gm27389 | 0.0000 | No |
| 24581 | Gm27390 | 0.0000 | No |
| 24582 | Gm27392 | 0.0000 | No |
| 24583 | Gm27393 | 0.0000 | No |
| 24584 | Gm27395 | 0.0000 | No |
| 24585 | Gm27396 | 0.0000 | No |
| 24586 | Gm27397 | 0.0000 | No |
| 24587 | Gm27399 | 0.0000 | No |
| 24588 | Gm27401 | 0.0000 | No |
| 24589 | Gm27402 | 0.0000 | No |
| 24590 | Gm27403 | 0.0000 | No |
| 24591 | Gm27404 | 0.0000 | No |
| 24592 | Gm27405 | 0.0000 | No |
| 24593 | Gm27406 | 0.0000 | No |
| 24594 | Gm27409 | 0.0000 | No |
| 24595 | Gm27410 | 0.0000 | No |
| 24596 | Gm27414 | 0.0000 | No |
| 24597 | Gm27415 | 0.0000 | No |
| 24598 | Gm27419 | 0.0000 | No |
| 24599 | Gm27420 | 0.0000 | No |
| 24600 | Gm27421 | 0.0000 | No |
| 24601 | Gm27427 | 0.0000 | No |
| 24602 | Gm27428 | 0.0000 | No |
| 24603 | Gm27430 | 0.0000 | No |
| 24604 | Gm27435 | 0.0000 | No |
| 24605 | Gm27437 | 0.0000 | No |
| 24606 | Gm27438 | 0.0000 | No |
| 24607 | Gm27440 | 0.0000 | No |

|       |         |        |    |
|-------|---------|--------|----|
| 24608 | Gm27441 | 0.0000 | No |
| 24609 | Gm27443 | 0.0000 | No |
| 24610 | Gm27444 | 0.0000 | No |
| 24611 | Gm27445 | 0.0000 | No |
| 24612 | Gm27446 | 0.0000 | No |
| 24613 | Gm27449 | 0.0000 | No |
| 24614 | Gm27450 | 0.0000 | No |
| 24615 | Gm27452 | 0.0000 | No |
| 24616 | Gm27454 | 0.0000 | No |
| 24617 | Gm27459 | 0.0000 | No |
| 24618 | Gm27460 | 0.0000 | No |
| 24619 | Gm27463 | 0.0000 | No |
| 24620 | Gm27465 | 0.0000 | No |
| 24621 | Gm27466 | 0.0000 | No |
| 24622 | Gm27468 | 0.0000 | No |
| 24623 | Gm27471 | 0.0000 | No |
| 24624 | Gm27475 | 0.0000 | No |
| 24625 | Gm27476 | 0.0000 | No |
| 24626 | Gm27477 | 0.0000 | No |
| 24627 | Gm27483 | 0.0000 | No |
| 24628 | Gm27486 | 0.0000 | No |
| 24629 | Gm27492 | 0.0000 | No |
| 24630 | Gm27493 | 0.0000 | No |
| 24631 | Gm27494 | 0.0000 | No |
| 24632 | Gm27500 | 0.0000 | No |
| 24633 | Gm27501 | 0.0000 | No |
| 24634 | Gm27502 | 0.0000 | No |
| 24635 | Gm27505 | 0.0000 | No |
| 24636 | Gm27506 | 0.0000 | No |
| 24637 | Gm27507 | 0.0000 | No |
| 24638 | Gm27509 | 0.0000 | No |
| 24639 | Gm27510 | 0.0000 | No |
| 24640 | Gm27512 | 0.0000 | No |
| 24641 | Gm27514 | 0.0000 | No |
| 24642 | Gm27516 | 0.0000 | No |
| 24643 | Gm27517 | 0.0000 | No |
| 24644 | Gm27520 | 0.0000 | No |
| 24645 | Gm27521 | 0.0000 | No |
| 24646 | Gm27522 | 0.0000 | No |
| 24647 | Gm27525 | 0.0000 | No |
| 24648 | Gm27527 | 0.0000 | No |
| 24649 | Gm27528 | 0.0000 | No |
| 24650 | Gm27529 | 0.0000 | No |
| 24651 | Gm27530 | 0.0000 | No |
| 24652 | Gm27532 | 0.0000 | No |
| 24653 | Gm27533 | 0.0000 | No |



|       |         |        |    |
|-------|---------|--------|----|
| 24654 | Gm27535 | 0.0000 | No |
| 24655 | Gm27538 | 0.0000 | No |
| 24656 | Gm27539 | 0.0000 | No |
| 24657 | Gm27540 | 0.0000 | No |
| 24658 | Gm27541 | 0.0000 | No |
| 24659 | Gm27542 | 0.0000 | No |
| 24660 | Gm27543 | 0.0000 | No |
| 24661 | Gm27544 | 0.0000 | No |
| 24662 | Gm27545 | 0.0000 | No |
| 24663 | Gm27549 | 0.0000 | No |
| 24664 | Gm27551 | 0.0000 | No |
| 24665 | Gm27552 | 0.0000 | No |
| 24666 | Gm27553 | 0.0000 | No |
| 24667 | Gm27554 | 0.0000 | No |
| 24668 | Gm2756  | 0.0000 | No |
| 24669 | Gm27564 | 0.0000 | No |
| 24670 | Gm27568 | 0.0000 | No |
| 24671 | Gm27572 | 0.0000 | No |
| 24672 | Gm27579 | 0.0000 | No |
| 24673 | Gm27582 | 0.0000 | No |
| 24674 | Gm27585 | 0.0000 | No |
| 24675 | Gm27587 | 0.0000 | No |
| 24676 | Gm27588 | 0.0000 | No |
| 24677 | Gm2759  | 0.0000 | No |
| 24678 | Gm27591 | 0.0000 | No |
| 24679 | Gm27592 | 0.0000 | No |
| 24680 | Gm27596 | 0.0000 | No |
| 24681 | Gm27597 | 0.0000 | No |
| 24682 | Gm27598 | 0.0000 | No |
| 24683 | Gm27599 | 0.0000 | No |
| 24684 | Gm27601 | 0.0000 | No |
| 24685 | Gm27602 | 0.0000 | No |
| 24686 | Gm27604 | 0.0000 | No |
| 24687 | Gm27605 | 0.0000 | No |
| 24688 | Gm27607 | 0.0000 | No |
| 24689 | Gm27608 | 0.0000 | No |
| 24690 | Gm27610 | 0.0000 | No |
| 24691 | Gm27611 | 0.0000 | No |
| 24692 | Gm27616 | 0.0000 | No |
| 24693 | Gm27617 | 0.0000 | No |
| 24694 | Gm27618 | 0.0000 | No |
| 24695 | Gm27619 | 0.0000 | No |
| 24696 | Gm2762  | 0.0000 | No |
| 24697 | Gm27622 | 0.0000 | No |
| 24698 | Gm27624 | 0.0000 | No |
| 24699 | Gm27626 | 0.0000 | No |

|       |         |        |    |
|-------|---------|--------|----|
| 24700 | Gm27627 | 0.0000 | No |
| 24701 | Gm27628 | 0.0000 | No |
| 24702 | Gm27631 | 0.0000 | No |
| 24703 | Gm27634 | 0.0000 | No |
| 24704 | Gm27635 | 0.0000 | No |
| 24705 | Gm27636 | 0.0000 | No |
| 24706 | Gm27640 | 0.0000 | No |
| 24707 | Gm27645 | 0.0000 | No |
| 24708 | Gm27646 | 0.0000 | No |
| 24709 | Gm27647 | 0.0000 | No |
| 24710 | Gm27649 | 0.0000 | No |
| 24711 | Gm27651 | 0.0000 | No |
| 24712 | Gm27653 | 0.0000 | No |
| 24713 | Gm27656 | 0.0000 | No |
| 24714 | Gm27659 | 0.0000 | No |
| 24715 | Gm27660 | 0.0000 | No |
| 24716 | Gm27663 | 0.0000 | No |
| 24717 | Gm27668 | 0.0000 | No |
| 24718 | Gm27671 | 0.0000 | No |
| 24719 | Gm27675 | 0.0000 | No |
| 24720 | Gm27676 | 0.0000 | No |
| 24721 | Gm27679 | 0.0000 | No |
| 24722 | Gm2768  | 0.0000 | No |
| 24723 | Gm27680 | 0.0000 | No |
| 24724 | Gm27682 | 0.0000 | No |
| 24725 | Gm27684 | 0.0000 | No |
| 24726 | Gm27686 | 0.0000 | No |
| 24727 | Gm27688 | 0.0000 | No |
| 24728 | Gm27690 | 0.0000 | No |
| 24729 | Gm27694 | 0.0000 | No |
| 24730 | Gm27695 | 0.0000 | No |
| 24731 | Gm27698 | 0.0000 | No |
| 24732 | Gm27699 | 0.0000 | No |
| 24733 | Gm27700 | 0.0000 | No |
| 24734 | Gm27701 | 0.0000 | No |
| 24735 | Gm27702 | 0.0000 | No |
| 24736 | Gm27703 | 0.0000 | No |
| 24737 | Gm27704 | 0.0000 | No |
| 24738 | Gm27711 | 0.0000 | No |
| 24739 | Gm27715 | 0.0000 | No |
| 24740 | Gm27718 | 0.0000 | No |
| 24741 | Gm27722 | 0.0000 | No |
| 24742 | Gm27723 | 0.0000 | No |
| 24743 | Gm27731 | 0.0000 | No |
| 24744 | Gm27733 | 0.0000 | No |
| 24745 | Gm27734 | 0.0000 | No |

|       |         |        |    |
|-------|---------|--------|----|
| 24746 | Gm27735 | 0.0000 | No |
| 24747 | Gm27740 | 0.0000 | No |
| 24748 | Gm27741 | 0.0000 | No |
| 24749 | Gm27742 | 0.0000 | No |
| 24750 | Gm27743 | 0.0000 | No |
| 24751 | Gm27747 | 0.0000 | No |
| 24752 | Gm27749 | 0.0000 | No |
| 24753 | Gm27754 | 0.0000 | No |
| 24754 | Gm27755 | 0.0000 | No |
| 24755 | Gm27760 | 0.0000 | No |
| 24756 | Gm27761 | 0.0000 | No |
| 24757 | Gm27762 | 0.0000 | No |
| 24758 | Gm2777  | 0.0000 | No |
| 24759 | Gm27772 | 0.0000 | No |
| 24760 | Gm27773 | 0.0000 | No |
| 24761 | Gm27782 | 0.0000 | No |
| 24762 | Gm27784 | 0.0000 | No |
| 24763 | Gm27785 | 0.0000 | No |
| 24764 | Gm27786 | 0.0000 | No |
| 24765 | Gm27793 | 0.0000 | No |
| 24766 | Gm27796 | 0.0000 | No |
| 24767 | Gm27798 | 0.0000 | No |
| 24768 | Gm27801 | 0.0000 | No |
| 24769 | Gm27803 | 0.0000 | No |
| 24770 | Gm27804 | 0.0000 | No |
| 24771 | Gm27805 | 0.0000 | No |
| 24772 | Gm27811 | 0.0000 | No |
| 24773 | Gm27813 | 0.0000 | No |
| 24774 | Gm27817 | 0.0000 | No |
| 24775 | Gm27820 | 0.0000 | No |
| 24776 | Gm27825 | 0.0000 | No |
| 24777 | Gm27826 | 0.0000 | No |
| 24778 | Gm27828 | 0.0000 | No |
| 24779 | Gm27833 | 0.0000 | No |
| 24780 | Gm27834 | 0.0000 | No |
| 24781 | Gm27838 | 0.0000 | No |
| 24782 | Gm27839 | 0.0000 | No |
| 24783 | Gm2784  | 0.0000 | No |
| 24784 | Gm27843 | 0.0000 | No |
| 24785 | Gm27844 | 0.0000 | No |
| 24786 | Gm27845 | 0.0000 | No |
| 24787 | Gm27847 | 0.0000 | No |
| 24788 | Gm27849 | 0.0000 | No |
| 24789 | Gm27851 | 0.0000 | No |
| 24790 | Gm27852 | 0.0000 | No |
| 24791 | Gm27853 | 0.0000 | No |

|       |         |        |    |
|-------|---------|--------|----|
| 24792 | Gm27854 | 0.0000 | No |
| 24793 | Gm27855 | 0.0000 | No |
| 24794 | Gm27857 | 0.0000 | No |
| 24795 | Gm27861 | 0.0000 | No |
| 24796 | Gm27864 | 0.0000 | No |
| 24797 | Gm27866 | 0.0000 | No |
| 24798 | Gm27867 | 0.0000 | No |
| 24799 | Gm27868 | 0.0000 | No |
| 24800 | Gm27869 | 0.0000 | No |
| 24801 | Gm27875 | 0.0000 | No |
| 24802 | Gm27878 | 0.0000 | No |
| 24803 | Gm2788  | 0.0000 | No |
| 24804 | Gm27881 | 0.0000 | No |
| 24805 | Gm27882 | 0.0000 | No |
| 24806 | Gm27883 | 0.0000 | No |
| 24807 | Gm27884 | 0.0000 | No |
| 24808 | Gm27887 | 0.0000 | No |
| 24809 | Gm27892 | 0.0000 | No |
| 24810 | Gm27893 | 0.0000 | No |
| 24811 | Gm27894 | 0.0000 | No |
| 24812 | Gm27896 | 0.0000 | No |
| 24813 | Gm27898 | 0.0000 | No |
| 24814 | Gm27899 | 0.0000 | No |
| 24815 | Gm27901 | 0.0000 | No |
| 24816 | Gm27903 | 0.0000 | No |
| 24817 | Gm27905 | 0.0000 | No |
| 24818 | Gm27907 | 0.0000 | No |
| 24819 | Gm27910 | 0.0000 | No |
| 24820 | Gm27913 | 0.0000 | No |
| 24821 | Gm27919 | 0.0000 | No |
| 24822 | Gm27920 | 0.0000 | No |
| 24823 | Gm27921 | 0.0000 | No |
| 24824 | Gm27924 | 0.0000 | No |
| 24825 | Gm27926 | 0.0000 | No |
| 24826 | Gm27927 | 0.0000 | No |
| 24827 | Gm27928 | 0.0000 | No |
| 24828 | Gm27931 | 0.0000 | No |
| 24829 | Gm27934 | 0.0000 | No |
| 24830 | Gm27935 | 0.0000 | No |
| 24831 | Gm27937 | 0.0000 | No |
| 24832 | Gm27940 | 0.0000 | No |
| 24833 | Gm27941 | 0.0000 | No |
| 24834 | Gm27942 | 0.0000 | No |
| 24835 | Gm27943 | 0.0000 | No |
| 24836 | Gm27944 | 0.0000 | No |
| 24837 | Gm27953 | 0.0000 | No |

|       |         |        |    |
|-------|---------|--------|----|
| 24838 | Gm27956 | 0.0000 | No |
| 24839 | Gm27957 | 0.0000 | No |
| 24840 | Gm27960 | 0.0000 | No |
| 24841 | Gm27964 | 0.0000 | No |
| 24842 | Gm27972 | 0.0000 | No |
| 24843 | Gm27974 | 0.0000 | No |
| 24844 | Gm27975 | 0.0000 | No |
| 24845 | Gm27976 | 0.0000 | No |
| 24846 | Gm27979 | 0.0000 | No |
| 24847 | Gm27980 | 0.0000 | No |
| 24848 | Gm27985 | 0.0000 | No |
| 24849 | Gm27989 | 0.0000 | No |
| 24850 | Gm2799  | 0.0000 | No |
| 24851 | Gm27991 | 0.0000 | No |
| 24852 | Gm27993 | 0.0000 | No |
| 24853 | Gm27995 | 0.0000 | No |
| 24854 | Gm27997 | 0.0000 | No |
| 24855 | Gm27998 | 0.0000 | No |
| 24856 | Gm27999 | 0.0000 | No |
| 24857 | Gm28000 | 0.0000 | No |
| 24858 | Gm28002 | 0.0000 | No |
| 24859 | Gm28003 | 0.0000 | No |
| 24860 | Gm28006 | 0.0000 | No |
| 24861 | Gm28008 | 0.0000 | No |
| 24862 | Gm28010 | 0.0000 | No |
| 24863 | Gm28011 | 0.0000 | No |
| 24864 | Gm28016 | 0.0000 | No |
| 24865 | Gm28017 | 0.0000 | No |
| 24866 | Gm28018 | 0.0000 | No |
| 24867 | Gm28020 | 0.0000 | No |
| 24868 | Gm28022 | 0.0000 | No |
| 24869 | Gm28023 | 0.0000 | No |
| 24870 | Gm28030 | 0.0000 | No |
| 24871 | Gm28032 | 0.0000 | No |
| 24872 | Gm28033 | 0.0000 | No |
| 24873 | Gm28035 | 0.0000 | No |
| 24874 | Gm28036 | 0.0000 | No |
| 24875 | Gm28037 | 0.0000 | No |
| 24876 | Gm28038 | 0.0000 | No |
| 24877 | Gm28039 | 0.0000 | No |
| 24878 | Gm28040 | 0.0000 | No |
| 24879 | Gm28041 | 0.0000 | No |
| 24880 | Gm28042 | 0.0000 | No |
| 24881 | Gm28043 | 0.0000 | No |
| 24882 | Gm28044 | 0.0000 | No |
| 24883 | Gm28046 | 0.0000 | No |

|       |         |        |    |
|-------|---------|--------|----|
| 24884 | Gm28047 | 0.0000 | No |
| 24885 | Gm28048 | 0.0000 | No |
| 24886 | Gm28051 | 0.0000 | No |
| 24887 | Gm28052 | 0.0000 | No |
| 24888 | Gm28053 | 0.0000 | No |
| 24889 | Gm28054 | 0.0000 | No |
| 24890 | Gm28055 | 0.0000 | No |
| 24891 | Gm28056 | 0.0000 | No |
| 24892 | Gm28057 | 0.0000 | No |
| 24893 | Gm28058 | 0.0000 | No |
| 24894 | Gm28059 | 0.0000 | No |
| 24895 | Gm28060 | 0.0000 | No |
| 24896 | Gm28061 | 0.0000 | No |
| 24897 | Gm28063 | 0.0000 | No |
| 24898 | Gm28064 | 0.0000 | No |
| 24899 | Gm28065 | 0.0000 | No |
| 24900 | Gm28066 | 0.0000 | No |
| 24901 | Gm28068 | 0.0000 | No |
| 24902 | Gm28069 | 0.0000 | No |
| 24903 | Gm28070 | 0.0000 | No |
| 24904 | Gm28071 | 0.0000 | No |
| 24905 | Gm28072 | 0.0000 | No |
| 24906 | Gm28073 | 0.0000 | No |
| 24907 | Gm28074 | 0.0000 | No |
| 24908 | Gm28075 | 0.0000 | No |
| 24909 | Gm28076 | 0.0000 | No |
| 24910 | Gm28079 | 0.0000 | No |
| 24911 | Gm28080 | 0.0000 | No |
| 24912 | Gm28081 | 0.0000 | No |
| 24913 | Gm28082 | 0.0000 | No |
| 24914 | Gm28085 | 0.0000 | No |
| 24915 | Gm28086 | 0.0000 | No |
| 24916 | Gm28087 | 0.0000 | No |
| 24917 | Gm28088 | 0.0000 | No |
| 24918 | Gm28089 | 0.0000 | No |
| 24919 | Gm28090 | 0.0000 | No |
| 24920 | Gm28091 | 0.0000 | No |
| 24921 | Gm28092 | 0.0000 | No |
| 24922 | Gm28093 | 0.0000 | No |
| 24923 | Gm28094 | 0.0000 | No |
| 24924 | Gm28096 | 0.0000 | No |
| 24925 | Gm28097 | 0.0000 | No |
| 24926 | Gm28098 | 0.0000 | No |
| 24927 | Gm28099 | 0.0000 | No |
| 24928 | Gm281   | 0.0000 | No |
| 24929 | Gm2810  | 0.0000 | No |

|       |         |        |    |
|-------|---------|--------|----|
| 24930 | Gm28100 | 0.0000 | No |
| 24931 | Gm28101 | 0.0000 | No |
| 24932 | Gm28102 | 0.0000 | No |
| 24933 | Gm28103 | 0.0000 | No |
| 24934 | Gm28104 | 0.0000 | No |
| 24935 | Gm28105 | 0.0000 | No |
| 24936 | Gm28107 | 0.0000 | No |
| 24937 | Gm28108 | 0.0000 | No |
| 24938 | Gm28109 | 0.0000 | No |
| 24939 | Gm28110 | 0.0000 | No |
| 24940 | Gm28111 | 0.0000 | No |
| 24941 | Gm28113 | 0.0000 | No |
| 24942 | Gm28114 | 0.0000 | No |
| 24943 | Gm28115 | 0.0000 | No |
| 24944 | Gm28116 | 0.0000 | No |
| 24945 | Gm28117 | 0.0000 | No |
| 24946 | Gm28118 | 0.0000 | No |
| 24947 | Gm28119 | 0.0000 | No |
| 24948 | Gm28120 | 0.0000 | No |
| 24949 | Gm28121 | 0.0000 | No |
| 24950 | Gm28122 | 0.0000 | No |
| 24951 | Gm28123 | 0.0000 | No |
| 24952 | Gm28124 | 0.0000 | No |
| 24953 | Gm28125 | 0.0000 | No |
| 24954 | Gm28126 | 0.0000 | No |
| 24955 | Gm28127 | 0.0000 | No |
| 24956 | Gm28128 | 0.0000 | No |
| 24957 | Gm28129 | 0.0000 | No |
| 24958 | Gm28130 | 0.0000 | No |
| 24959 | Gm28131 | 0.0000 | No |
| 24960 | Gm28132 | 0.0000 | No |
| 24961 | Gm28133 | 0.0000 | No |
| 24962 | Gm28134 | 0.0000 | No |
| 24963 | Gm28135 | 0.0000 | No |
| 24964 | Gm28136 | 0.0000 | No |
| 24965 | Gm28137 | 0.0000 | No |
| 24966 | Gm28138 | 0.0000 | No |
| 24967 | Gm28140 | 0.0000 | No |
| 24968 | Gm28141 | 0.0000 | No |
| 24969 | Gm28142 | 0.0000 | No |
| 24970 | Gm28143 | 0.0000 | No |
| 24971 | Gm28144 | 0.0000 | No |
| 24972 | Gm28145 | 0.0000 | No |
| 24973 | Gm28146 | 0.0000 | No |
| 24974 | Gm28147 | 0.0000 | No |
| 24975 | Gm28149 | 0.0000 | No |

|       |         |        |    |
|-------|---------|--------|----|
| 24976 | Gm28150 | 0.0000 | No |
| 24977 | Gm28151 | 0.0000 | No |
| 24978 | Gm28152 | 0.0000 | No |
| 24979 | Gm28153 | 0.0000 | No |
| 24980 | Gm28154 | 0.0000 | No |
| 24981 | Gm28155 | 0.0000 | No |
| 24982 | Gm28156 | 0.0000 | No |
| 24983 | Gm28157 | 0.0000 | No |
| 24984 | Gm28158 | 0.0000 | No |
| 24985 | Gm28159 | 0.0000 | No |
| 24986 | Gm28160 | 0.0000 | No |
| 24987 | Gm28161 | 0.0000 | No |
| 24988 | Gm28162 | 0.0000 | No |
| 24989 | Gm28163 | 0.0000 | No |
| 24990 | Gm28164 | 0.0000 | No |
| 24991 | Gm28165 | 0.0000 | No |
| 24992 | Gm28166 | 0.0000 | No |
| 24993 | Gm28167 | 0.0000 | No |
| 24994 | Gm28168 | 0.0000 | No |
| 24995 | Gm28170 | 0.0000 | No |
| 24996 | Gm28171 | 0.0000 | No |
| 24997 | Gm28172 | 0.0000 | No |
| 24998 | Gm28173 | 0.0000 | No |
| 24999 | Gm28174 | 0.0000 | No |
| 25000 | Gm28175 | 0.0000 | No |
| 25001 | Gm28176 | 0.0000 | No |
| 25002 | Gm28177 | 0.0000 | No |
| 25003 | Gm28178 | 0.0000 | No |
| 25004 | Gm28179 | 0.0000 | No |
| 25005 | Gm28180 | 0.0000 | No |
| 25006 | Gm28181 | 0.0000 | No |
| 25007 | Gm28182 | 0.0000 | No |
| 25008 | Gm28183 | 0.0000 | No |
| 25009 | Gm28184 | 0.0000 | No |
| 25010 | Gm28185 | 0.0000 | No |
| 25011 | Gm28186 | 0.0000 | No |
| 25012 | Gm28187 | 0.0000 | No |
| 25013 | Gm28188 | 0.0000 | No |
| 25014 | Gm28189 | 0.0000 | No |
| 25015 | Gm28190 | 0.0000 | No |
| 25016 | Gm28191 | 0.0000 | No |
| 25017 | Gm28192 | 0.0000 | No |
| 25018 | Gm28193 | 0.0000 | No |
| 25019 | Gm28194 | 0.0000 | No |
| 25020 | Gm28195 | 0.0000 | No |
| 25021 | Gm28197 | 0.0000 | No |



|       |         |        |    |
|-------|---------|--------|----|
| 25022 | Gm28198 | 0.0000 | No |
| 25023 | Gm28200 | 0.0000 | No |
| 25024 | Gm28201 | 0.0000 | No |
| 25025 | Gm28202 | 0.0000 | No |
| 25026 | Gm28203 | 0.0000 | No |
| 25027 | Gm28204 | 0.0000 | No |
| 25028 | Gm28205 | 0.0000 | No |
| 25029 | Gm28206 | 0.0000 | No |
| 25030 | Gm28207 | 0.0000 | No |
| 25031 | Gm28208 | 0.0000 | No |
| 25032 | Gm28209 | 0.0000 | No |
| 25033 | Gm28210 | 0.0000 | No |
| 25034 | Gm28211 | 0.0000 | No |
| 25035 | Gm28212 | 0.0000 | No |
| 25036 | Gm28213 | 0.0000 | No |
| 25037 | Gm28215 | 0.0000 | No |
| 25038 | Gm28216 | 0.0000 | No |
| 25039 | Gm28217 | 0.0000 | No |
| 25040 | Gm28218 | 0.0000 | No |
| 25041 | Gm2822  | 0.0000 | No |
| 25042 | Gm28220 | 0.0000 | No |
| 25043 | Gm28221 | 0.0000 | No |
| 25044 | Gm28222 | 0.0000 | No |
| 25045 | Gm28223 | 0.0000 | No |
| 25046 | Gm28224 | 0.0000 | No |
| 25047 | Gm28225 | 0.0000 | No |
| 25048 | Gm28226 | 0.0000 | No |
| 25049 | Gm28227 | 0.0000 | No |
| 25050 | Gm28228 | 0.0000 | No |
| 25051 | Gm28229 | 0.0000 | No |
| 25052 | Gm28230 | 0.0000 | No |
| 25053 | Gm28231 | 0.0000 | No |
| 25054 | Gm28232 | 0.0000 | No |
| 25055 | Gm28233 | 0.0000 | No |
| 25056 | Gm28234 | 0.0000 | No |
| 25057 | Gm28235 | 0.0000 | No |
| 25058 | Gm28236 | 0.0000 | No |
| 25059 | Gm28237 | 0.0000 | No |
| 25060 | Gm28238 | 0.0000 | No |
| 25061 | Gm28239 | 0.0000 | No |
| 25062 | Gm2824  | 0.0000 | No |
| 25063 | Gm28240 | 0.0000 | No |
| 25064 | Gm28241 | 0.0000 | No |
| 25065 | Gm28242 | 0.0000 | No |
| 25066 | Gm28243 | 0.0000 | No |
| 25067 | Gm28244 | 0.0000 | No |

|       |         |        |    |
|-------|---------|--------|----|
| 25068 | Gm28245 | 0.0000 | No |
| 25069 | Gm28246 | 0.0000 | No |
| 25070 | Gm28247 | 0.0000 | No |
| 25071 | Gm28248 | 0.0000 | No |
| 25072 | Gm28249 | 0.0000 | No |
| 25073 | Gm2825  | 0.0000 | No |
| 25074 | Gm28250 | 0.0000 | No |
| 25075 | Gm28251 | 0.0000 | No |
| 25076 | Gm28252 | 0.0000 | No |
| 25077 | Gm28253 | 0.0000 | No |
| 25078 | Gm28254 | 0.0000 | No |
| 25079 | Gm28255 | 0.0000 | No |
| 25080 | Gm28256 | 0.0000 | No |
| 25081 | Gm28257 | 0.0000 | No |
| 25082 | Gm28258 | 0.0000 | No |
| 25083 | Gm28259 | 0.0000 | No |
| 25084 | Gm28260 | 0.0000 | No |
| 25085 | Gm28261 | 0.0000 | No |
| 25086 | Gm28262 | 0.0000 | No |
| 25087 | Gm28263 | 0.0000 | No |
| 25088 | Gm28264 | 0.0000 | No |
| 25089 | Gm28265 | 0.0000 | No |
| 25090 | Gm28266 | 0.0000 | No |
| 25091 | Gm28267 | 0.0000 | No |
| 25092 | Gm28270 | 0.0000 | No |
| 25093 | Gm28272 | 0.0000 | No |
| 25094 | Gm28273 | 0.0000 | No |
| 25095 | Gm28274 | 0.0000 | No |
| 25096 | Gm28275 | 0.0000 | No |
| 25097 | Gm28276 | 0.0000 | No |
| 25098 | Gm28277 | 0.0000 | No |
| 25099 | Gm28278 | 0.0000 | No |
| 25100 | Gm28279 | 0.0000 | No |
| 25101 | Gm28280 | 0.0000 | No |
| 25102 | Gm28281 | 0.0000 | No |
| 25103 | Gm28283 | 0.0000 | No |
| 25104 | Gm28284 | 0.0000 | No |
| 25105 | Gm28285 | 0.0000 | No |
| 25106 | Gm28287 | 0.0000 | No |
| 25107 | Gm28289 | 0.0000 | No |
| 25108 | Gm28290 | 0.0000 | No |
| 25109 | Gm28291 | 0.0000 | No |
| 25110 | Gm28292 | 0.0000 | No |
| 25111 | Gm28293 | 0.0000 | No |
| 25112 | Gm28294 | 0.0000 | No |
| 25113 | Gm28295 | 0.0000 | No |

|       |         |        |    |
|-------|---------|--------|----|
| 25114 | Gm28296 | 0.0000 | No |
| 25115 | Gm28297 | 0.0000 | No |
| 25116 | Gm28298 | 0.0000 | No |
| 25117 | Gm28299 | 0.0000 | No |
| 25118 | Gm2830  | 0.0000 | No |
| 25119 | Gm28300 | 0.0000 | No |
| 25120 | Gm28301 | 0.0000 | No |
| 25121 | Gm28302 | 0.0000 | No |
| 25122 | Gm28303 | 0.0000 | No |
| 25123 | Gm28304 | 0.0000 | No |
| 25124 | Gm28305 | 0.0000 | No |
| 25125 | Gm28306 | 0.0000 | No |
| 25126 | Gm28308 | 0.0000 | No |
| 25127 | Gm28309 | 0.0000 | No |
| 25128 | Gm28310 | 0.0000 | No |
| 25129 | Gm28311 | 0.0000 | No |
| 25130 | Gm28312 | 0.0000 | No |
| 25131 | Gm28313 | 0.0000 | No |
| 25132 | Gm28314 | 0.0000 | No |
| 25133 | Gm28315 | 0.0000 | No |
| 25134 | Gm28316 | 0.0000 | No |
| 25135 | Gm28317 | 0.0000 | No |
| 25136 | Gm28318 | 0.0000 | No |
| 25137 | Gm28319 | 0.0000 | No |
| 25138 | Gm2832  | 0.0000 | No |
| 25139 | Gm28320 | 0.0000 | No |
| 25140 | Gm28321 | 0.0000 | No |
| 25141 | Gm28322 | 0.0000 | No |
| 25142 | Gm28323 | 0.0000 | No |
| 25143 | Gm28324 | 0.0000 | No |
| 25144 | Gm28325 | 0.0000 | No |
| 25145 | Gm28326 | 0.0000 | No |
| 25146 | Gm28327 | 0.0000 | No |
| 25147 | Gm28328 | 0.0000 | No |
| 25148 | Gm28329 | 0.0000 | No |
| 25149 | Gm28330 | 0.0000 | No |
| 25150 | Gm28331 | 0.0000 | No |
| 25151 | Gm28332 | 0.0000 | No |
| 25152 | Gm28333 | 0.0000 | No |
| 25153 | Gm28334 | 0.0000 | No |
| 25154 | Gm28335 | 0.0000 | No |
| 25155 | Gm28336 | 0.0000 | No |
| 25156 | Gm28337 | 0.0000 | No |
| 25157 | Gm28338 | 0.0000 | No |
| 25158 | Gm28339 | 0.0000 | No |
| 25159 | Gm28340 | 0.0000 | No |

|       |         |        |    |
|-------|---------|--------|----|
| 25160 | Gm28341 | 0.0000 | No |
| 25161 | Gm28342 | 0.0000 | No |
| 25162 | Gm28343 | 0.0000 | No |
| 25163 | Gm28344 | 0.0000 | No |
| 25164 | Gm28345 | 0.0000 | No |
| 25165 | Gm28346 | 0.0000 | No |
| 25166 | Gm28347 | 0.0000 | No |
| 25167 | Gm28348 | 0.0000 | No |
| 25168 | Gm28349 | 0.0000 | No |
| 25169 | Gm28350 | 0.0000 | No |
| 25170 | Gm28351 | 0.0000 | No |
| 25171 | Gm28352 | 0.0000 | No |
| 25172 | Gm28353 | 0.0000 | No |
| 25173 | Gm28354 | 0.0000 | No |
| 25174 | Gm28355 | 0.0000 | No |
| 25175 | Gm28356 | 0.0000 | No |
| 25176 | Gm28357 | 0.0000 | No |
| 25177 | Gm28358 | 0.0000 | No |
| 25178 | Gm28359 | 0.0000 | No |
| 25179 | Gm28361 | 0.0000 | No |
| 25180 | Gm28362 | 0.0000 | No |
| 25181 | Gm28364 | 0.0000 | No |
| 25182 | Gm28365 | 0.0000 | No |
| 25183 | Gm28366 | 0.0000 | No |
| 25184 | Gm28367 | 0.0000 | No |
| 25185 | Gm28368 | 0.0000 | No |
| 25186 | Gm28369 | 0.0000 | No |
| 25187 | Gm28370 | 0.0000 | No |
| 25188 | Gm28371 | 0.0000 | No |
| 25189 | Gm28372 | 0.0000 | No |
| 25190 | Gm28373 | 0.0000 | No |
| 25191 | Gm28375 | 0.0000 | No |
| 25192 | Gm28376 | 0.0000 | No |
| 25193 | Gm28377 | 0.0000 | No |
| 25194 | Gm28379 | 0.0000 | No |
| 25195 | Gm28380 | 0.0000 | No |
| 25196 | Gm28381 | 0.0000 | No |
| 25197 | Gm28383 | 0.0000 | No |
| 25198 | Gm28384 | 0.0000 | No |
| 25199 | Gm28385 | 0.0000 | No |
| 25200 | Gm28386 | 0.0000 | No |
| 25201 | Gm28387 | 0.0000 | No |
| 25202 | Gm28389 | 0.0000 | No |
| 25203 | Gm28390 | 0.0000 | No |
| 25204 | Gm28391 | 0.0000 | No |
| 25205 | Gm28392 | 0.0000 | No |

|       |         |        |    |
|-------|---------|--------|----|
| 25206 | Gm28393 | 0.0000 | No |
| 25207 | Gm28394 | 0.0000 | No |
| 25208 | Gm28395 | 0.0000 | No |
| 25209 | Gm28396 | 0.0000 | No |
| 25210 | Gm28397 | 0.0000 | No |
| 25211 | Gm28398 | 0.0000 | No |
| 25212 | Gm28399 | 0.0000 | No |
| 25213 | Gm2840  | 0.0000 | No |
| 25214 | Gm28400 | 0.0000 | No |
| 25215 | Gm28401 | 0.0000 | No |
| 25216 | Gm28402 | 0.0000 | No |
| 25217 | Gm28403 | 0.0000 | No |
| 25218 | Gm28404 | 0.0000 | No |
| 25219 | Gm28405 | 0.0000 | No |
| 25220 | Gm28407 | 0.0000 | No |
| 25221 | Gm28408 | 0.0000 | No |
| 25222 | Gm28409 | 0.0000 | No |
| 25223 | Gm28411 | 0.0000 | No |
| 25224 | Gm28412 | 0.0000 | No |
| 25225 | Gm28413 | 0.0000 | No |
| 25226 | Gm28414 | 0.0000 | No |
| 25227 | Gm28415 | 0.0000 | No |
| 25228 | Gm28416 | 0.0000 | No |
| 25229 | Gm28417 | 0.0000 | No |
| 25230 | Gm28418 | 0.0000 | No |
| 25231 | Gm28419 | 0.0000 | No |
| 25232 | Gm28420 | 0.0000 | No |
| 25233 | Gm28421 | 0.0000 | No |
| 25234 | Gm28422 | 0.0000 | No |
| 25235 | Gm28423 | 0.0000 | No |
| 25236 | Gm28424 | 0.0000 | No |
| 25237 | Gm28425 | 0.0000 | No |
| 25238 | Gm28426 | 0.0000 | No |
| 25239 | Gm28427 | 0.0000 | No |
| 25240 | Gm28428 | 0.0000 | No |
| 25241 | Gm28429 | 0.0000 | No |
| 25242 | Gm28430 | 0.0000 | No |
| 25243 | Gm28431 | 0.0000 | No |
| 25244 | Gm28432 | 0.0000 | No |
| 25245 | Gm28433 | 0.0000 | No |
| 25246 | Gm28434 | 0.0000 | No |
| 25247 | Gm28435 | 0.0000 | No |
| 25248 | Gm28436 | 0.0000 | No |
| 25249 | Gm28437 | 0.0000 | No |
| 25250 | Gm28438 | 0.0000 | No |
| 25251 | Gm28439 | 0.0000 | No |

|       |         |        |    |
|-------|---------|--------|----|
| 25252 | Gm28440 | 0.0000 | No |
| 25253 | Gm28441 | 0.0000 | No |
| 25254 | Gm28442 | 0.0000 | No |
| 25255 | Gm28443 | 0.0000 | No |
| 25256 | Gm28444 | 0.0000 | No |
| 25257 | Gm28446 | 0.0000 | No |
| 25258 | Gm28447 | 0.0000 | No |
| 25259 | Gm28448 | 0.0000 | No |
| 25260 | Gm28449 | 0.0000 | No |
| 25261 | Gm28450 | 0.0000 | No |
| 25262 | Gm28451 | 0.0000 | No |
| 25263 | Gm28452 | 0.0000 | No |
| 25264 | Gm28453 | 0.0000 | No |
| 25265 | Gm28454 | 0.0000 | No |
| 25266 | Gm28455 | 0.0000 | No |
| 25267 | Gm28456 | 0.0000 | No |
| 25268 | Gm28457 | 0.0000 | No |
| 25269 | Gm28458 | 0.0000 | No |
| 25270 | Gm28459 | 0.0000 | No |
| 25271 | Gm28460 | 0.0000 | No |
| 25272 | Gm28461 | 0.0000 | No |
| 25273 | Gm28462 | 0.0000 | No |
| 25274 | Gm28463 | 0.0000 | No |
| 25275 | Gm28464 | 0.0000 | No |
| 25276 | Gm28465 | 0.0000 | No |
| 25277 | Gm28466 | 0.0000 | No |
| 25278 | Gm28467 | 0.0000 | No |
| 25279 | Gm28468 | 0.0000 | No |
| 25280 | Gm28470 | 0.0000 | No |
| 25281 | Gm28471 | 0.0000 | No |
| 25282 | Gm28472 | 0.0000 | No |
| 25283 | Gm28473 | 0.0000 | No |
| 25284 | Gm28474 | 0.0000 | No |
| 25285 | Gm28475 | 0.0000 | No |
| 25286 | Gm28476 | 0.0000 | No |
| 25287 | Gm28477 | 0.0000 | No |
| 25288 | Gm28478 | 0.0000 | No |
| 25289 | Gm28480 | 0.0000 | No |
| 25290 | Gm28481 | 0.0000 | No |
| 25291 | Gm28482 | 0.0000 | No |
| 25292 | Gm28483 | 0.0000 | No |
| 25293 | Gm28484 | 0.0000 | No |
| 25294 | Gm28485 | 0.0000 | No |
| 25295 | Gm28486 | 0.0000 | No |
| 25296 | Gm28487 | 0.0000 | No |
| 25297 | Gm28488 | 0.0000 | No |

|       |         |        |    |
|-------|---------|--------|----|
| 25298 | Gm28489 | 0.0000 | No |
| 25299 | Gm28490 | 0.0000 | No |
| 25300 | Gm28491 | 0.0000 | No |
| 25301 | Gm28492 | 0.0000 | No |
| 25302 | Gm28493 | 0.0000 | No |
| 25303 | Gm28494 | 0.0000 | No |
| 25304 | Gm28495 | 0.0000 | No |
| 25305 | Gm28496 | 0.0000 | No |
| 25306 | Gm28498 | 0.0000 | No |
| 25307 | Gm28499 | 0.0000 | No |
| 25308 | Gm28500 | 0.0000 | No |
| 25309 | Gm28501 | 0.0000 | No |
| 25310 | Gm28502 | 0.0000 | No |
| 25311 | Gm28503 | 0.0000 | No |
| 25312 | Gm28504 | 0.0000 | No |
| 25313 | Gm28505 | 0.0000 | No |
| 25314 | Gm28506 | 0.0000 | No |
| 25315 | Gm28507 | 0.0000 | No |
| 25316 | Gm28508 | 0.0000 | No |
| 25317 | Gm28509 | 0.0000 | No |
| 25318 | Gm28510 | 0.0000 | No |
| 25319 | Gm28511 | 0.0000 | No |
| 25320 | Gm28512 | 0.0000 | No |
| 25321 | Gm28513 | 0.0000 | No |
| 25322 | Gm28514 | 0.0000 | No |
| 25323 | Gm28515 | 0.0000 | No |
| 25324 | Gm28516 | 0.0000 | No |
| 25325 | Gm28517 | 0.0000 | No |
| 25326 | Gm28518 | 0.0000 | No |
| 25327 | Gm28519 | 0.0000 | No |
| 25328 | Gm28520 | 0.0000 | No |
| 25329 | Gm28521 | 0.0000 | No |
| 25330 | Gm28522 | 0.0000 | No |
| 25331 | Gm28523 | 0.0000 | No |
| 25332 | Gm28527 | 0.0000 | No |
| 25333 | Gm28528 | 0.0000 | No |
| 25334 | Gm28529 | 0.0000 | No |
| 25335 | Gm28530 | 0.0000 | No |
| 25336 | Gm28531 | 0.0000 | No |
| 25337 | Gm28532 | 0.0000 | No |
| 25338 | Gm28533 | 0.0000 | No |
| 25339 | Gm28534 | 0.0000 | No |
| 25340 | Gm28535 | 0.0000 | No |
| 25341 | Gm28536 | 0.0000 | No |
| 25342 | Gm28537 | 0.0000 | No |
| 25343 | Gm28538 | 0.0000 | No |

|       |         |        |    |
|-------|---------|--------|----|
| 25344 | Gm28539 | 0.0000 | No |
| 25345 | Gm2854  | 0.0000 | No |
| 25346 | Gm28540 | 0.0000 | No |
| 25347 | Gm28541 | 0.0000 | No |
| 25348 | Gm28542 | 0.0000 | No |
| 25349 | Gm28543 | 0.0000 | No |
| 25350 | Gm28545 | 0.0000 | No |
| 25351 | Gm28546 | 0.0000 | No |
| 25352 | Gm28547 | 0.0000 | No |
| 25353 | Gm28548 | 0.0000 | No |
| 25354 | Gm28549 | 0.0000 | No |
| 25355 | Gm2855  | 0.0000 | No |
| 25356 | Gm28550 | 0.0000 | No |
| 25357 | Gm28551 | 0.0000 | No |
| 25358 | Gm28552 | 0.0000 | No |
| 25359 | Gm28553 | 0.0000 | No |
| 25360 | Gm28554 | 0.0000 | No |
| 25361 | Gm28555 | 0.0000 | No |
| 25362 | Gm28556 | 0.0000 | No |
| 25363 | Gm28557 | 0.0000 | No |
| 25364 | Gm28558 | 0.0000 | No |
| 25365 | Gm28559 | 0.0000 | No |
| 25366 | Gm28560 | 0.0000 | No |
| 25367 | Gm28561 | 0.0000 | No |
| 25368 | Gm28563 | 0.0000 | No |
| 25369 | Gm28564 | 0.0000 | No |
| 25370 | Gm28565 | 0.0000 | No |
| 25371 | Gm28566 | 0.0000 | No |
| 25372 | Gm28567 | 0.0000 | No |
| 25373 | Gm28568 | 0.0000 | No |
| 25374 | Gm28569 | 0.0000 | No |
| 25375 | Gm28570 | 0.0000 | No |
| 25376 | Gm28571 | 0.0000 | No |
| 25377 | Gm28572 | 0.0000 | No |
| 25378 | Gm28573 | 0.0000 | No |
| 25379 | Gm28574 | 0.0000 | No |
| 25380 | Gm28575 | 0.0000 | No |
| 25381 | Gm28576 | 0.0000 | No |
| 25382 | Gm28577 | 0.0000 | No |
| 25383 | Gm28578 | 0.0000 | No |
| 25384 | Gm28579 | 0.0000 | No |
| 25385 | Gm28580 | 0.0000 | No |
| 25386 | Gm28581 | 0.0000 | No |
| 25387 | Gm28583 | 0.0000 | No |
| 25388 | Gm28584 | 0.0000 | No |
| 25389 | Gm28585 | 0.0000 | No |



|       |         |        |    |
|-------|---------|--------|----|
| 25390 | Gm28586 | 0.0000 | No |
| 25391 | Gm28587 | 0.0000 | No |
| 25392 | Gm28588 | 0.0000 | No |
| 25393 | Gm28589 | 0.0000 | No |
| 25394 | Gm28591 | 0.0000 | No |
| 25395 | Gm28592 | 0.0000 | No |
| 25396 | Gm28593 | 0.0000 | No |
| 25397 | Gm28594 | 0.0000 | No |
| 25398 | Gm28595 | 0.0000 | No |
| 25399 | Gm28596 | 0.0000 | No |
| 25400 | Gm28597 | 0.0000 | No |
| 25401 | Gm28598 | 0.0000 | No |
| 25402 | Gm28599 | 0.0000 | No |
| 25403 | Gm2860  | 0.0000 | No |
| 25404 | Gm28600 | 0.0000 | No |
| 25405 | Gm28603 | 0.0000 | No |
| 25406 | Gm28604 | 0.0000 | No |
| 25407 | Gm28606 | 0.0000 | No |
| 25408 | Gm28607 | 0.0000 | No |
| 25409 | Gm28608 | 0.0000 | No |
| 25410 | Gm28609 | 0.0000 | No |
| 25411 | Gm2861  | 0.0000 | No |
| 25412 | Gm28610 | 0.0000 | No |
| 25413 | Gm28611 | 0.0000 | No |
| 25414 | Gm28612 | 0.0000 | No |
| 25415 | Gm28613 | 0.0000 | No |
| 25416 | Gm28614 | 0.0000 | No |
| 25417 | Gm28615 | 0.0000 | No |
| 25418 | Gm28616 | 0.0000 | No |
| 25419 | Gm28617 | 0.0000 | No |
| 25420 | Gm28618 | 0.0000 | No |
| 25421 | Gm28619 | 0.0000 | No |
| 25422 | Gm2862  | 0.0000 | No |
| 25423 | Gm28620 | 0.0000 | No |
| 25424 | Gm28623 | 0.0000 | No |
| 25425 | Gm28624 | 0.0000 | No |
| 25426 | Gm28625 | 0.0000 | No |
| 25427 | Gm28626 | 0.0000 | No |
| 25428 | Gm28627 | 0.0000 | No |
| 25429 | Gm28628 | 0.0000 | No |
| 25430 | Gm28629 | 0.0000 | No |
| 25431 | Gm2863  | 0.0000 | No |
| 25432 | Gm28631 | 0.0000 | No |
| 25433 | Gm28632 | 0.0000 | No |
| 25434 | Gm28633 | 0.0000 | No |
| 25435 | Gm28635 | 0.0000 | No |

|       |         |        |    |
|-------|---------|--------|----|
| 25436 | Gm28636 | 0.0000 | No |
| 25437 | Gm28637 | 0.0000 | No |
| 25438 | Gm28638 | 0.0000 | No |
| 25439 | Gm28639 | 0.0000 | No |
| 25440 | Gm28640 | 0.0000 | No |
| 25441 | Gm28641 | 0.0000 | No |
| 25442 | Gm28643 | 0.0000 | No |
| 25443 | Gm28644 | 0.0000 | No |
| 25444 | Gm28646 | 0.0000 | No |
| 25445 | Gm28647 | 0.0000 | No |
| 25446 | Gm28648 | 0.0000 | No |
| 25447 | Gm28650 | 0.0000 | No |
| 25448 | Gm28651 | 0.0000 | No |
| 25449 | Gm28652 | 0.0000 | No |
| 25450 | Gm28653 | 0.0000 | No |
| 25451 | Gm28654 | 0.0000 | No |
| 25452 | Gm28655 | 0.0000 | No |
| 25453 | Gm28656 | 0.0000 | No |
| 25454 | Gm28657 | 0.0000 | No |
| 25455 | Gm28658 | 0.0000 | No |
| 25456 | Gm28659 | 0.0000 | No |
| 25457 | Gm2866  | 0.0000 | No |
| 25458 | Gm28660 | 0.0000 | No |
| 25459 | Gm28661 | 0.0000 | No |
| 25460 | Gm28662 | 0.0000 | No |
| 25461 | Gm28663 | 0.0000 | No |
| 25462 | Gm28664 | 0.0000 | No |
| 25463 | Gm28665 | 0.0000 | No |
| 25464 | Gm28666 | 0.0000 | No |
| 25465 | Gm28668 | 0.0000 | No |
| 25466 | Gm28669 | 0.0000 | No |
| 25467 | Gm28670 | 0.0000 | No |
| 25468 | Gm28671 | 0.0000 | No |
| 25469 | Gm28672 | 0.0000 | No |
| 25470 | Gm28673 | 0.0000 | No |
| 25471 | Gm28674 | 0.0000 | No |
| 25472 | Gm28676 | 0.0000 | No |
| 25473 | Gm28677 | 0.0000 | No |
| 25474 | Gm28678 | 0.0000 | No |
| 25475 | Gm28679 | 0.0000 | No |
| 25476 | Gm28680 | 0.0000 | No |
| 25477 | Gm28681 | 0.0000 | No |
| 25478 | Gm28682 | 0.0000 | No |
| 25479 | Gm28683 | 0.0000 | No |
| 25480 | Gm28684 | 0.0000 | No |
| 25481 | Gm28685 | 0.0000 | No |

|       |         |        |    |
|-------|---------|--------|----|
| 25482 | Gm28687 | 0.0000 | No |
| 25483 | Gm28688 | 0.0000 | No |
| 25484 | Gm28689 | 0.0000 | No |
| 25485 | Gm2869  | 0.0000 | No |
| 25486 | Gm28690 | 0.0000 | No |
| 25487 | Gm28691 | 0.0000 | No |
| 25488 | Gm28692 | 0.0000 | No |
| 25489 | Gm28693 | 0.0000 | No |
| 25490 | Gm28694 | 0.0000 | No |
| 25491 | Gm28695 | 0.0000 | No |
| 25492 | Gm28696 | 0.0000 | No |
| 25493 | Gm28697 | 0.0000 | No |
| 25494 | Gm28698 | 0.0000 | No |
| 25495 | Gm28699 | 0.0000 | No |
| 25496 | Gm28700 | 0.0000 | No |
| 25497 | Gm28701 | 0.0000 | No |
| 25498 | Gm28702 | 0.0000 | No |
| 25499 | Gm28704 | 0.0000 | No |
| 25500 | Gm28705 | 0.0000 | No |
| 25501 | Gm28706 | 0.0000 | No |
| 25502 | Gm28707 | 0.0000 | No |
| 25503 | Gm28709 | 0.0000 | No |
| 25504 | Gm2871  | 0.0000 | No |
| 25505 | Gm28710 | 0.0000 | No |
| 25506 | Gm28716 | 0.0000 | No |
| 25507 | Gm28717 | 0.0000 | No |
| 25508 | Gm28718 | 0.0000 | No |
| 25509 | Gm28719 | 0.0000 | No |
| 25510 | Gm28720 | 0.0000 | No |
| 25511 | Gm28721 | 0.0000 | No |
| 25512 | Gm28722 | 0.0000 | No |
| 25513 | Gm28723 | 0.0000 | No |
| 25514 | Gm28725 | 0.0000 | No |
| 25515 | Gm28726 | 0.0000 | No |
| 25516 | Gm28727 | 0.0000 | No |
| 25517 | Gm28728 | 0.0000 | No |
| 25518 | Gm28729 | 0.0000 | No |
| 25519 | Gm28731 | 0.0000 | No |
| 25520 | Gm28732 | 0.0000 | No |
| 25521 | Gm28733 | 0.0000 | No |
| 25522 | Gm28734 | 0.0000 | No |
| 25523 | Gm28735 | 0.0000 | No |
| 25524 | Gm28736 | 0.0000 | No |
| 25525 | Gm28737 | 0.0000 | No |
| 25526 | Gm28738 | 0.0000 | No |
| 25527 | Gm28739 | 0.0000 | No |

|       |         |        |    |
|-------|---------|--------|----|
| 25528 | Gm28740 | 0.0000 | No |
| 25529 | Gm28741 | 0.0000 | No |
| 25530 | Gm28742 | 0.0000 | No |
| 25531 | Gm28744 | 0.0000 | No |
| 25532 | Gm28745 | 0.0000 | No |
| 25533 | Gm28747 | 0.0000 | No |
| 25534 | Gm28749 | 0.0000 | No |
| 25535 | Gm2875  | 0.0000 | No |
| 25536 | Gm28750 | 0.0000 | No |
| 25537 | Gm28751 | 0.0000 | No |
| 25538 | Gm28752 | 0.0000 | No |
| 25539 | Gm28753 | 0.0000 | No |
| 25540 | Gm28754 | 0.0000 | No |
| 25541 | Gm28755 | 0.0000 | No |
| 25542 | Gm28756 | 0.0000 | No |
| 25543 | Gm28757 | 0.0000 | No |
| 25544 | Gm28758 | 0.0000 | No |
| 25545 | Gm28759 | 0.0000 | No |
| 25546 | Gm28760 | 0.0000 | No |
| 25547 | Gm28761 | 0.0000 | No |
| 25548 | Gm28762 | 0.0000 | No |
| 25549 | Gm28763 | 0.0000 | No |
| 25550 | Gm28764 | 0.0000 | No |
| 25551 | Gm28765 | 0.0000 | No |
| 25552 | Gm28766 | 0.0000 | No |
| 25553 | Gm28767 | 0.0000 | No |
| 25554 | Gm28768 | 0.0000 | No |
| 25555 | Gm2877  | 0.0000 | No |
| 25556 | Gm28770 | 0.0000 | No |
| 25557 | Gm28771 | 0.0000 | No |
| 25558 | Gm28772 | 0.0000 | No |
| 25559 | Gm28774 | 0.0000 | No |
| 25560 | Gm28775 | 0.0000 | No |
| 25561 | Gm28776 | 0.0000 | No |
| 25562 | Gm28778 | 0.0000 | No |
| 25563 | Gm28779 | 0.0000 | No |
| 25564 | Gm28780 | 0.0000 | No |
| 25565 | Gm28781 | 0.0000 | No |
| 25566 | Gm28782 | 0.0000 | No |
| 25567 | Gm28783 | 0.0000 | No |
| 25568 | Gm28784 | 0.0000 | No |
| 25569 | Gm28785 | 0.0000 | No |
| 25570 | Gm28786 | 0.0000 | No |
| 25571 | Gm28787 | 0.0000 | No |
| 25572 | Gm28788 | 0.0000 | No |
| 25573 | Gm28789 | 0.0000 | No |

|       |         |        |    |
|-------|---------|--------|----|
| 25574 | Gm28790 | 0.0000 | No |
| 25575 | Gm28791 | 0.0000 | No |
| 25576 | Gm28792 | 0.0000 | No |
| 25577 | Gm28793 | 0.0000 | No |
| 25578 | Gm28794 | 0.0000 | No |
| 25579 | Gm28795 | 0.0000 | No |
| 25580 | Gm28796 | 0.0000 | No |
| 25581 | Gm28797 | 0.0000 | No |
| 25582 | Gm28798 | 0.0000 | No |
| 25583 | Gm28799 | 0.0000 | No |
| 25584 | Gm28800 | 0.0000 | No |
| 25585 | Gm28801 | 0.0000 | No |
| 25586 | Gm28802 | 0.0000 | No |
| 25587 | Gm28803 | 0.0000 | No |
| 25588 | Gm28806 | 0.0000 | No |
| 25589 | Gm28808 | 0.0000 | No |
| 25590 | Gm28809 | 0.0000 | No |
| 25591 | Gm28810 | 0.0000 | No |
| 25592 | Gm28811 | 0.0000 | No |
| 25593 | Gm28812 | 0.0000 | No |
| 25594 | Gm28813 | 0.0000 | No |
| 25595 | Gm28814 | 0.0000 | No |
| 25596 | Gm28815 | 0.0000 | No |
| 25597 | Gm28816 | 0.0000 | No |
| 25598 | Gm28817 | 0.0000 | No |
| 25599 | Gm28819 | 0.0000 | No |
| 25600 | Gm28820 | 0.0000 | No |
| 25601 | Gm28822 | 0.0000 | No |
| 25602 | Gm28823 | 0.0000 | No |
| 25603 | Gm28824 | 0.0000 | No |
| 25604 | Gm28825 | 0.0000 | No |
| 25605 | Gm28827 | 0.0000 | No |
| 25606 | Gm28828 | 0.0000 | No |
| 25607 | Gm28829 | 0.0000 | No |
| 25608 | Gm28830 | 0.0000 | No |
| 25609 | Gm28831 | 0.0000 | No |
| 25610 | Gm28832 | 0.0000 | No |
| 25611 | Gm28833 | 0.0000 | No |
| 25612 | Gm28834 | 0.0000 | No |
| 25613 | Gm28835 | 0.0000 | No |
| 25614 | Gm28837 | 0.0000 | No |
| 25615 | Gm28838 | 0.0000 | No |
| 25616 | Gm28839 | 0.0000 | No |
| 25617 | Gm28840 | 0.0000 | No |
| 25618 | Gm28841 | 0.0000 | No |
| 25619 | Gm28842 | 0.0000 | No |

|       |         |        |    |
|-------|---------|--------|----|
| 25620 | Gm28843 | 0.0000 | No |
| 25621 | Gm28844 | 0.0000 | No |
| 25622 | Gm28845 | 0.0000 | No |
| 25623 | Gm28846 | 0.0000 | No |
| 25624 | Gm28848 | 0.0000 | No |
| 25625 | Gm28849 | 0.0000 | No |
| 25626 | Gm2885  | 0.0000 | No |
| 25627 | Gm28850 | 0.0000 | No |
| 25628 | Gm28851 | 0.0000 | No |
| 25629 | Gm28852 | 0.0000 | No |
| 25630 | Gm28853 | 0.0000 | No |
| 25631 | Gm28854 | 0.0000 | No |
| 25632 | Gm28855 | 0.0000 | No |
| 25633 | Gm28857 | 0.0000 | No |
| 25634 | Gm28858 | 0.0000 | No |
| 25635 | Gm28859 | 0.0000 | No |
| 25636 | Gm28860 | 0.0000 | No |
| 25637 | Gm28861 | 0.0000 | No |
| 25638 | Gm28862 | 0.0000 | No |
| 25639 | Gm28863 | 0.0000 | No |
| 25640 | Gm28864 | 0.0000 | No |
| 25641 | Gm28867 | 0.0000 | No |
| 25642 | Gm28869 | 0.0000 | No |
| 25643 | Gm28870 | 0.0000 | No |
| 25644 | Gm28871 | 0.0000 | No |
| 25645 | Gm28872 | 0.0000 | No |
| 25646 | Gm28873 | 0.0000 | No |
| 25647 | Gm28874 | 0.0000 | No |
| 25648 | Gm28875 | 0.0000 | No |
| 25649 | Gm28876 | 0.0000 | No |
| 25650 | Gm28877 | 0.0000 | No |
| 25651 | Gm28878 | 0.0000 | No |
| 25652 | Gm28879 | 0.0000 | No |
| 25653 | Gm2888  | 0.0000 | No |
| 25654 | Gm28880 | 0.0000 | No |
| 25655 | Gm28881 | 0.0000 | No |
| 25656 | Gm28882 | 0.0000 | No |
| 25657 | Gm28884 | 0.0000 | No |
| 25658 | Gm28885 | 0.0000 | No |
| 25659 | Gm28886 | 0.0000 | No |
| 25660 | Gm28887 | 0.0000 | No |
| 25661 | Gm28888 | 0.0000 | No |
| 25662 | Gm28889 | 0.0000 | No |
| 25663 | Gm28890 | 0.0000 | No |
| 25664 | Gm28891 | 0.0000 | No |
| 25665 | Gm28892 | 0.0000 | No |

|       |         |        |    |
|-------|---------|--------|----|
| 25666 | Gm28893 | 0.0000 | No |
| 25667 | Gm28894 | 0.0000 | No |
| 25668 | Gm28895 | 0.0000 | No |
| 25669 | Gm28896 | 0.0000 | No |
| 25670 | Gm28897 | 0.0000 | No |
| 25671 | Gm28898 | 0.0000 | No |
| 25672 | Gm28899 | 0.0000 | No |
| 25673 | Gm28900 | 0.0000 | No |
| 25674 | Gm28901 | 0.0000 | No |
| 25675 | Gm28902 | 0.0000 | No |
| 25676 | Gm28904 | 0.0000 | No |
| 25677 | Gm28905 | 0.0000 | No |
| 25678 | Gm28906 | 0.0000 | No |
| 25679 | Gm28907 | 0.0000 | No |
| 25680 | Gm28908 | 0.0000 | No |
| 25681 | Gm28909 | 0.0000 | No |
| 25682 | Gm28910 | 0.0000 | No |
| 25683 | Gm28911 | 0.0000 | No |
| 25684 | Gm28912 | 0.0000 | No |
| 25685 | Gm28913 | 0.0000 | No |
| 25686 | Gm28914 | 0.0000 | No |
| 25687 | Gm28916 | 0.0000 | No |
| 25688 | Gm28917 | 0.0000 | No |
| 25689 | Gm28918 | 0.0000 | No |
| 25690 | Gm2892  | 0.0000 | No |
| 25691 | Gm28921 | 0.0000 | No |
| 25692 | Gm28922 | 0.0000 | No |
| 25693 | Gm28923 | 0.0000 | No |
| 25694 | Gm28924 | 0.0000 | No |
| 25695 | Gm28925 | 0.0000 | No |
| 25696 | Gm28926 | 0.0000 | No |
| 25697 | Gm28927 | 0.0000 | No |
| 25698 | Gm28928 | 0.0000 | No |
| 25699 | Gm28929 | 0.0000 | No |
| 25700 | Gm28930 | 0.0000 | No |
| 25701 | Gm28932 | 0.0000 | No |
| 25702 | Gm28933 | 0.0000 | No |
| 25703 | Gm28934 | 0.0000 | No |
| 25704 | Gm28935 | 0.0000 | No |
| 25705 | Gm28936 | 0.0000 | No |
| 25706 | Gm28937 | 0.0000 | No |
| 25707 | Gm28938 | 0.0000 | No |
| 25708 | Gm28939 | 0.0000 | No |
| 25709 | Gm28940 | 0.0000 | No |
| 25710 | Gm28941 | 0.0000 | No |
| 25711 | Gm28943 | 0.0000 | No |

|       |         |        |    |
|-------|---------|--------|----|
| 25712 | Gm28944 | 0.0000 | No |
| 25713 | Gm28945 | 0.0000 | No |
| 25714 | Gm28946 | 0.0000 | No |
| 25715 | Gm28947 | 0.0000 | No |
| 25716 | Gm28948 | 0.0000 | No |
| 25717 | Gm28949 | 0.0000 | No |
| 25718 | Gm2895  | 0.0000 | No |
| 25719 | Gm28950 | 0.0000 | No |
| 25720 | Gm28951 | 0.0000 | No |
| 25721 | Gm28952 | 0.0000 | No |
| 25722 | Gm28953 | 0.0000 | No |
| 25723 | Gm28954 | 0.0000 | No |
| 25724 | Gm28955 | 0.0000 | No |
| 25725 | Gm28956 | 0.0000 | No |
| 25726 | Gm28957 | 0.0000 | No |
| 25727 | Gm28958 | 0.0000 | No |
| 25728 | Gm28959 | 0.0000 | No |
| 25729 | Gm28960 | 0.0000 | No |
| 25730 | Gm28961 | 0.0000 | No |
| 25731 | Gm28962 | 0.0000 | No |
| 25732 | Gm28963 | 0.0000 | No |
| 25733 | Gm28964 | 0.0000 | No |
| 25734 | Gm28965 | 0.0000 | No |
| 25735 | Gm28966 | 0.0000 | No |
| 25736 | Gm28967 | 0.0000 | No |
| 25737 | Gm28968 | 0.0000 | No |
| 25738 | Gm28969 | 0.0000 | No |
| 25739 | Gm28970 | 0.0000 | No |
| 25740 | Gm28971 | 0.0000 | No |
| 25741 | Gm28972 | 0.0000 | No |
| 25742 | Gm28973 | 0.0000 | No |
| 25743 | Gm28974 | 0.0000 | No |
| 25744 | Gm28975 | 0.0000 | No |
| 25745 | Gm28976 | 0.0000 | No |
| 25746 | Gm28977 | 0.0000 | No |
| 25747 | Gm28978 | 0.0000 | No |
| 25748 | Gm28979 | 0.0000 | No |
| 25749 | Gm28980 | 0.0000 | No |
| 25750 | Gm28982 | 0.0000 | No |
| 25751 | Gm28983 | 0.0000 | No |
| 25752 | Gm28984 | 0.0000 | No |
| 25753 | Gm28986 | 0.0000 | No |
| 25754 | Gm28987 | 0.0000 | No |
| 25755 | Gm28988 | 0.0000 | No |
| 25756 | Gm28989 | 0.0000 | No |
| 25757 | Gm28990 | 0.0000 | No |



|       |         |        |    |
|-------|---------|--------|----|
| 25758 | Gm28992 | 0.0000 | No |
| 25759 | Gm28993 | 0.0000 | No |
| 25760 | Gm28994 | 0.0000 | No |
| 25761 | Gm28995 | 0.0000 | No |
| 25762 | Gm28996 | 0.0000 | No |
| 25763 | Gm28997 | 0.0000 | No |
| 25764 | Gm28998 | 0.0000 | No |
| 25765 | Gm28999 | 0.0000 | No |
| 25766 | Gm29000 | 0.0000 | No |
| 25767 | Gm29001 | 0.0000 | No |
| 25768 | Gm29002 | 0.0000 | No |
| 25769 | Gm29003 | 0.0000 | No |
| 25770 | Gm29006 | 0.0000 | No |
| 25771 | Gm29007 | 0.0000 | No |
| 25772 | Gm29008 | 0.0000 | No |
| 25773 | Gm29010 | 0.0000 | No |
| 25774 | Gm29012 | 0.0000 | No |
| 25775 | Gm29013 | 0.0000 | No |
| 25776 | Gm29014 | 0.0000 | No |
| 25777 | Gm29016 | 0.0000 | No |
| 25778 | Gm29017 | 0.0000 | No |
| 25779 | Gm29018 | 0.0000 | No |
| 25780 | Gm29020 | 0.0000 | No |
| 25781 | Gm29021 | 0.0000 | No |
| 25782 | Gm29023 | 0.0000 | No |
| 25783 | Gm29024 | 0.0000 | No |
| 25784 | Gm29025 | 0.0000 | No |
| 25785 | Gm29026 | 0.0000 | No |
| 25786 | Gm29027 | 0.0000 | No |
| 25787 | Gm29028 | 0.0000 | No |
| 25788 | Gm29029 | 0.0000 | No |
| 25789 | Gm29030 | 0.0000 | No |
| 25790 | Gm29031 | 0.0000 | No |
| 25791 | Gm29032 | 0.0000 | No |
| 25792 | Gm29033 | 0.0000 | No |
| 25793 | Gm29034 | 0.0000 | No |
| 25794 | Gm29036 | 0.0000 | No |
| 25795 | Gm29037 | 0.0000 | No |
| 25796 | Gm29038 | 0.0000 | No |
| 25797 | Gm2904  | 0.0000 | No |
| 25798 | Gm29040 | 0.0000 | No |
| 25799 | Gm29041 | 0.0000 | No |
| 25800 | Gm29042 | 0.0000 | No |
| 25801 | Gm29043 | 0.0000 | No |
| 25802 | Gm29044 | 0.0000 | No |
| 25803 | Gm29045 | 0.0000 | No |

|       |         |        |    |
|-------|---------|--------|----|
| 25804 | Gm29046 | 0.0000 | No |
| 25805 | Gm29047 | 0.0000 | No |
| 25806 | Gm29048 | 0.0000 | No |
| 25807 | Gm29049 | 0.0000 | No |
| 25808 | Gm29050 | 0.0000 | No |
| 25809 | Gm29051 | 0.0000 | No |
| 25810 | Gm29053 | 0.0000 | No |
| 25811 | Gm29056 | 0.0000 | No |
| 25812 | Gm29057 | 0.0000 | No |
| 25813 | Gm29058 | 0.0000 | No |
| 25814 | Gm29059 | 0.0000 | No |
| 25815 | Gm29060 | 0.0000 | No |
| 25816 | Gm29061 | 0.0000 | No |
| 25817 | Gm29062 | 0.0000 | No |
| 25818 | Gm29063 | 0.0000 | No |
| 25819 | Gm29064 | 0.0000 | No |
| 25820 | Gm29065 | 0.0000 | No |
| 25821 | Gm29066 | 0.0000 | No |
| 25822 | Gm29068 | 0.0000 | No |
| 25823 | Gm29069 | 0.0000 | No |
| 25824 | Gm2907  | 0.0000 | No |
| 25825 | Gm29070 | 0.0000 | No |
| 25826 | Gm29071 | 0.0000 | No |
| 25827 | Gm29072 | 0.0000 | No |
| 25828 | Gm29073 | 0.0000 | No |
| 25829 | Gm29074 | 0.0000 | No |
| 25830 | Gm29075 | 0.0000 | No |
| 25831 | Gm29076 | 0.0000 | No |
| 25832 | Gm29077 | 0.0000 | No |
| 25833 | Gm29078 | 0.0000 | No |
| 25834 | Gm29079 | 0.0000 | No |
| 25835 | Gm29080 | 0.0000 | No |
| 25836 | Gm29081 | 0.0000 | No |
| 25837 | Gm29082 | 0.0000 | No |
| 25838 | Gm29083 | 0.0000 | No |
| 25839 | Gm29084 | 0.0000 | No |
| 25840 | Gm29085 | 0.0000 | No |
| 25841 | Gm29086 | 0.0000 | No |
| 25842 | Gm29087 | 0.0000 | No |
| 25843 | Gm29088 | 0.0000 | No |
| 25844 | Gm29089 | 0.0000 | No |
| 25845 | Gm29090 | 0.0000 | No |
| 25846 | Gm29092 | 0.0000 | No |
| 25847 | Gm29093 | 0.0000 | No |
| 25848 | Gm29097 | 0.0000 | No |
| 25849 | Gm29098 | 0.0000 | No |

|       |         |        |    |
|-------|---------|--------|----|
| 25850 | Gm29099 | 0.0000 | No |
| 25851 | Gm29100 | 0.0000 | No |
| 25852 | Gm29101 | 0.0000 | No |
| 25853 | Gm29103 | 0.0000 | No |
| 25854 | Gm29104 | 0.0000 | No |
| 25855 | Gm29105 | 0.0000 | No |
| 25856 | Gm29106 | 0.0000 | No |
| 25857 | Gm29107 | 0.0000 | No |
| 25858 | Gm29108 | 0.0000 | No |
| 25859 | Gm29109 | 0.0000 | No |
| 25860 | Gm29110 | 0.0000 | No |
| 25861 | Gm29111 | 0.0000 | No |
| 25862 | Gm29112 | 0.0000 | No |
| 25863 | Gm29113 | 0.0000 | No |
| 25864 | Gm29114 | 0.0000 | No |
| 25865 | Gm29115 | 0.0000 | No |
| 25866 | Gm29116 | 0.0000 | No |
| 25867 | Gm29117 | 0.0000 | No |
| 25868 | Gm29118 | 0.0000 | No |
| 25869 | Gm29119 | 0.0000 | No |
| 25870 | Gm29120 | 0.0000 | No |
| 25871 | Gm29121 | 0.0000 | No |
| 25872 | Gm29122 | 0.0000 | No |
| 25873 | Gm29123 | 0.0000 | No |
| 25874 | Gm29124 | 0.0000 | No |
| 25875 | Gm29125 | 0.0000 | No |
| 25876 | Gm29126 | 0.0000 | No |
| 25877 | Gm29128 | 0.0000 | No |
| 25878 | Gm29129 | 0.0000 | No |
| 25879 | Gm2913  | 0.0000 | No |
| 25880 | Gm29130 | 0.0000 | No |
| 25881 | Gm29131 | 0.0000 | No |
| 25882 | Gm29132 | 0.0000 | No |
| 25883 | Gm29133 | 0.0000 | No |
| 25884 | Gm29134 | 0.0000 | No |
| 25885 | Gm29135 | 0.0000 | No |
| 25886 | Gm29137 | 0.0000 | No |
| 25887 | Gm29138 | 0.0000 | No |
| 25888 | Gm29139 | 0.0000 | No |
| 25889 | Gm2914  | 0.0000 | No |
| 25890 | Gm29140 | 0.0000 | No |
| 25891 | Gm29142 | 0.0000 | No |
| 25892 | Gm29143 | 0.0000 | No |
| 25893 | Gm29144 | 0.0000 | No |
| 25894 | Gm29145 | 0.0000 | No |
| 25895 | Gm29146 | 0.0000 | No |

|       |         |        |    |
|-------|---------|--------|----|
| 25896 | Gm29147 | 0.0000 | No |
| 25897 | Gm29148 | 0.0000 | No |
| 25898 | Gm29149 | 0.0000 | No |
| 25899 | Gm29151 | 0.0000 | No |
| 25900 | Gm29152 | 0.0000 | No |
| 25901 | Gm29154 | 0.0000 | No |
| 25902 | Gm29155 | 0.0000 | No |
| 25903 | Gm29157 | 0.0000 | No |
| 25904 | Gm29158 | 0.0000 | No |
| 25905 | Gm29159 | 0.0000 | No |
| 25906 | Gm2916  | 0.0000 | No |
| 25907 | Gm29160 | 0.0000 | No |
| 25908 | Gm29161 | 0.0000 | No |
| 25909 | Gm29162 | 0.0000 | No |
| 25910 | Gm29163 | 0.0000 | No |
| 25911 | Gm29164 | 0.0000 | No |
| 25912 | Gm29165 | 0.0000 | No |
| 25913 | Gm29166 | 0.0000 | No |
| 25914 | Gm29167 | 0.0000 | No |
| 25915 | Gm29168 | 0.0000 | No |
| 25916 | Gm29169 | 0.0000 | No |
| 25917 | Gm29170 | 0.0000 | No |
| 25918 | Gm29171 | 0.0000 | No |
| 25919 | Gm29175 | 0.0000 | No |
| 25920 | Gm29178 | 0.0000 | No |
| 25921 | Gm29179 | 0.0000 | No |
| 25922 | Gm29180 | 0.0000 | No |
| 25923 | Gm29181 | 0.0000 | No |
| 25924 | Gm29182 | 0.0000 | No |
| 25925 | Gm29184 | 0.0000 | No |
| 25926 | Gm29185 | 0.0000 | No |
| 25927 | Gm29186 | 0.0000 | No |
| 25928 | Gm29187 | 0.0000 | No |
| 25929 | Gm29188 | 0.0000 | No |
| 25930 | Gm29189 | 0.0000 | No |
| 25931 | Gm29190 | 0.0000 | No |
| 25932 | Gm29191 | 0.0000 | No |
| 25933 | Gm29192 | 0.0000 | No |
| 25934 | Gm29193 | 0.0000 | No |
| 25935 | Gm29194 | 0.0000 | No |
| 25936 | Gm29195 | 0.0000 | No |
| 25937 | Gm29196 | 0.0000 | No |
| 25938 | Gm29197 | 0.0000 | No |
| 25939 | Gm29198 | 0.0000 | No |
| 25940 | Gm29199 | 0.0000 | No |
| 25941 | Gm29200 | 0.0000 | No |

|       |         |        |    |
|-------|---------|--------|----|
| 25942 | Gm29201 | 0.0000 | No |
| 25943 | Gm29202 | 0.0000 | No |
| 25944 | Gm29203 | 0.0000 | No |
| 25945 | Gm29204 | 0.0000 | No |
| 25946 | Gm29205 | 0.0000 | No |
| 25947 | Gm29206 | 0.0000 | No |
| 25948 | Gm29207 | 0.0000 | No |
| 25949 | Gm29208 | 0.0000 | No |
| 25950 | Gm29209 | 0.0000 | No |
| 25951 | Gm29210 | 0.0000 | No |
| 25952 | Gm29211 | 0.0000 | No |
| 25953 | Gm29212 | 0.0000 | No |
| 25954 | Gm29213 | 0.0000 | No |
| 25955 | Gm29214 | 0.0000 | No |
| 25956 | Gm29215 | 0.0000 | No |
| 25957 | Gm29216 | 0.0000 | No |
| 25958 | Gm29217 | 0.0000 | No |
| 25959 | Gm29218 | 0.0000 | No |
| 25960 | Gm29219 | 0.0000 | No |
| 25961 | Gm29220 | 0.0000 | No |
| 25962 | Gm29221 | 0.0000 | No |
| 25963 | Gm29222 | 0.0000 | No |
| 25964 | Gm29223 | 0.0000 | No |
| 25965 | Gm29224 | 0.0000 | No |
| 25966 | Gm29225 | 0.0000 | No |
| 25967 | Gm29226 | 0.0000 | No |
| 25968 | Gm29227 | 0.0000 | No |
| 25969 | Gm29228 | 0.0000 | No |
| 25970 | Gm29229 | 0.0000 | No |
| 25971 | Gm29231 | 0.0000 | No |
| 25972 | Gm29232 | 0.0000 | No |
| 25973 | Gm29233 | 0.0000 | No |
| 25974 | Gm29234 | 0.0000 | No |
| 25975 | Gm29235 | 0.0000 | No |
| 25976 | Gm29236 | 0.0000 | No |
| 25977 | Gm29238 | 0.0000 | No |
| 25978 | Gm29239 | 0.0000 | No |
| 25979 | Gm29240 | 0.0000 | No |
| 25980 | Gm29242 | 0.0000 | No |
| 25981 | Gm29244 | 0.0000 | No |
| 25982 | Gm29246 | 0.0000 | No |
| 25983 | Gm29247 | 0.0000 | No |
| 25984 | Gm29248 | 0.0000 | No |
| 25985 | Gm29249 | 0.0000 | No |
| 25986 | Gm29250 | 0.0000 | No |
| 25987 | Gm29251 | 0.0000 | No |

|       |         |        |    |
|-------|---------|--------|----|
| 25988 | Gm29252 | 0.0000 | No |
| 25989 | Gm29253 | 0.0000 | No |
| 25990 | Gm29255 | 0.0000 | No |
| 25991 | Gm29256 | 0.0000 | No |
| 25992 | Gm29257 | 0.0000 | No |
| 25993 | Gm29258 | 0.0000 | No |
| 25994 | Gm29259 | 0.0000 | No |
| 25995 | Gm2926  | 0.0000 | No |
| 25996 | Gm29260 | 0.0000 | No |
| 25997 | Gm29261 | 0.0000 | No |
| 25998 | Gm29262 | 0.0000 | No |
| 25999 | Gm29263 | 0.0000 | No |
| 26000 | Gm29264 | 0.0000 | No |
| 26001 | Gm29265 | 0.0000 | No |
| 26002 | Gm29266 | 0.0000 | No |
| 26003 | Gm29267 | 0.0000 | No |
| 26004 | Gm29268 | 0.0000 | No |
| 26005 | Gm29269 | 0.0000 | No |
| 26006 | Gm2927  | 0.0000 | No |
| 26007 | Gm29270 | 0.0000 | No |
| 26008 | Gm29271 | 0.0000 | No |
| 26009 | Gm29272 | 0.0000 | No |
| 26010 | Gm29274 | 0.0000 | No |
| 26011 | Gm29275 | 0.0000 | No |
| 26012 | Gm29276 | 0.0000 | No |
| 26013 | Gm29277 | 0.0000 | No |
| 26014 | Gm29278 | 0.0000 | No |
| 26015 | Gm29279 | 0.0000 | No |
| 26016 | Gm29280 | 0.0000 | No |
| 26017 | Gm29281 | 0.0000 | No |
| 26018 | Gm29282 | 0.0000 | No |
| 26019 | Gm29283 | 0.0000 | No |
| 26020 | Gm29284 | 0.0000 | No |
| 26021 | Gm29285 | 0.0000 | No |
| 26022 | Gm29286 | 0.0000 | No |
| 26023 | Gm29288 | 0.0000 | No |
| 26024 | Gm29289 | 0.0000 | No |
| 26025 | Gm29290 | 0.0000 | No |
| 26026 | Gm29291 | 0.0000 | No |
| 26027 | Gm29295 | 0.0000 | No |
| 26028 | Gm29296 | 0.0000 | No |
| 26029 | Gm29297 | 0.0000 | No |
| 26030 | Gm29298 | 0.0000 | No |
| 26031 | Gm29299 | 0.0000 | No |
| 26032 | Gm2930  | 0.0000 | No |
| 26033 | Gm29300 | 0.0000 | No |

|       |         |        |    |
|-------|---------|--------|----|
| 26034 | Gm29301 | 0.0000 | No |
| 26035 | Gm29303 | 0.0000 | No |
| 26036 | Gm29304 | 0.0000 | No |
| 26037 | Gm29305 | 0.0000 | No |
| 26038 | Gm29306 | 0.0000 | No |
| 26039 | Gm29307 | 0.0000 | No |
| 26040 | Gm29308 | 0.0000 | No |
| 26041 | Gm29309 | 0.0000 | No |
| 26042 | Gm29310 | 0.0000 | No |
| 26043 | Gm29311 | 0.0000 | No |
| 26044 | Gm29312 | 0.0000 | No |
| 26045 | Gm29313 | 0.0000 | No |
| 26046 | Gm29314 | 0.0000 | No |
| 26047 | Gm29315 | 0.0000 | No |
| 26048 | Gm29316 | 0.0000 | No |
| 26049 | Gm29317 | 0.0000 | No |
| 26050 | Gm29319 | 0.0000 | No |
| 26051 | Gm29320 | 0.0000 | No |
| 26052 | Gm29321 | 0.0000 | No |
| 26053 | Gm29322 | 0.0000 | No |
| 26054 | Gm29323 | 0.0000 | No |
| 26055 | Gm29324 | 0.0000 | No |
| 26056 | Gm29325 | 0.0000 | No |
| 26057 | Gm29326 | 0.0000 | No |
| 26058 | Gm29327 | 0.0000 | No |
| 26059 | Gm29328 | 0.0000 | No |
| 26060 | Gm29329 | 0.0000 | No |
| 26061 | Gm2933  | 0.0000 | No |
| 26062 | Gm29330 | 0.0000 | No |
| 26063 | Gm29331 | 0.0000 | No |
| 26064 | Gm29332 | 0.0000 | No |
| 26065 | Gm29333 | 0.0000 | No |
| 26066 | Gm29335 | 0.0000 | No |
| 26067 | Gm29336 | 0.0000 | No |
| 26068 | Gm29337 | 0.0000 | No |
| 26069 | Gm29338 | 0.0000 | No |
| 26070 | Gm29339 | 0.0000 | No |
| 26071 | Gm29340 | 0.0000 | No |
| 26072 | Gm29341 | 0.0000 | No |
| 26073 | Gm29342 | 0.0000 | No |
| 26074 | Gm29343 | 0.0000 | No |
| 26075 | Gm29344 | 0.0000 | No |
| 26076 | Gm29345 | 0.0000 | No |
| 26077 | Gm29346 | 0.0000 | No |
| 26078 | Gm29347 | 0.0000 | No |
| 26079 | Gm29348 | 0.0000 | No |

|       |         |        |    |
|-------|---------|--------|----|
| 26080 | Gm29349 | 0.0000 | No |
| 26081 | Gm29350 | 0.0000 | No |
| 26082 | Gm29351 | 0.0000 | No |
| 26083 | Gm29352 | 0.0000 | No |
| 26084 | Gm29353 | 0.0000 | No |
| 26085 | Gm29354 | 0.0000 | No |
| 26086 | Gm29355 | 0.0000 | No |
| 26087 | Gm29356 | 0.0000 | No |
| 26088 | Gm29357 | 0.0000 | No |
| 26089 | Gm29358 | 0.0000 | No |
| 26090 | Gm29359 | 0.0000 | No |
| 26091 | Gm29360 | 0.0000 | No |
| 26092 | Gm29361 | 0.0000 | No |
| 26093 | Gm29362 | 0.0000 | No |
| 26094 | Gm29363 | 0.0000 | No |
| 26095 | Gm29364 | 0.0000 | No |
| 26096 | Gm29365 | 0.0000 | No |
| 26097 | Gm29366 | 0.0000 | No |
| 26098 | Gm29367 | 0.0000 | No |
| 26099 | Gm29368 | 0.0000 | No |
| 26100 | Gm29369 | 0.0000 | No |
| 26101 | Gm29370 | 0.0000 | No |
| 26102 | Gm29371 | 0.0000 | No |
| 26103 | Gm29372 | 0.0000 | No |
| 26104 | Gm29373 | 0.0000 | No |
| 26105 | Gm29374 | 0.0000 | No |
| 26106 | Gm29376 | 0.0000 | No |
| 26107 | Gm29377 | 0.0000 | No |
| 26108 | Gm29378 | 0.0000 | No |
| 26109 | Gm29379 | 0.0000 | No |
| 26110 | Gm29380 | 0.0000 | No |
| 26111 | Gm29381 | 0.0000 | No |
| 26112 | Gm29382 | 0.0000 | No |
| 26113 | Gm29383 | 0.0000 | No |
| 26114 | Gm29384 | 0.0000 | No |
| 26115 | Gm29385 | 0.0000 | No |
| 26116 | Gm29386 | 0.0000 | No |
| 26117 | Gm29389 | 0.0000 | No |
| 26118 | Gm2939  | 0.0000 | No |
| 26119 | Gm29390 | 0.0000 | No |
| 26120 | Gm29391 | 0.0000 | No |
| 26121 | Gm29392 | 0.0000 | No |
| 26122 | Gm29393 | 0.0000 | No |
| 26123 | Gm29394 | 0.0000 | No |
| 26124 | Gm29395 | 0.0000 | No |
| 26125 | Gm29396 | 0.0000 | No |



|       |         |        |    |
|-------|---------|--------|----|
| 26126 | Gm29397 | 0.0000 | No |
| 26127 | Gm29399 | 0.0000 | No |
| 26128 | Gm29400 | 0.0000 | No |
| 26129 | Gm29401 | 0.0000 | No |
| 26130 | Gm29402 | 0.0000 | No |
| 26131 | Gm29403 | 0.0000 | No |
| 26132 | Gm29404 | 0.0000 | No |
| 26133 | Gm29405 | 0.0000 | No |
| 26134 | Gm29406 | 0.0000 | No |
| 26135 | Gm29407 | 0.0000 | No |
| 26136 | Gm29408 | 0.0000 | No |
| 26137 | Gm29409 | 0.0000 | No |
| 26138 | Gm29410 | 0.0000 | No |
| 26139 | Gm29411 | 0.0000 | No |
| 26140 | Gm29412 | 0.0000 | No |
| 26141 | Gm29413 | 0.0000 | No |
| 26142 | Gm29414 | 0.0000 | No |
| 26143 | Gm29416 | 0.0000 | No |
| 26144 | Gm29418 | 0.0000 | No |
| 26145 | Gm29420 | 0.0000 | No |
| 26146 | Gm29421 | 0.0000 | No |
| 26147 | Gm29422 | 0.0000 | No |
| 26148 | Gm29423 | 0.0000 | No |
| 26149 | Gm29424 | 0.0000 | No |
| 26150 | Gm29425 | 0.0000 | No |
| 26151 | Gm29426 | 0.0000 | No |
| 26152 | Gm29427 | 0.0000 | No |
| 26153 | Gm29428 | 0.0000 | No |
| 26154 | Gm29429 | 0.0000 | No |
| 26155 | Gm29430 | 0.0000 | No |
| 26156 | Gm29431 | 0.0000 | No |
| 26157 | Gm29432 | 0.0000 | No |
| 26158 | Gm29433 | 0.0000 | No |
| 26159 | Gm29434 | 0.0000 | No |
| 26160 | Gm29435 | 0.0000 | No |
| 26161 | Gm29436 | 0.0000 | No |
| 26162 | Gm29437 | 0.0000 | No |
| 26163 | Gm29439 | 0.0000 | No |
| 26164 | Gm29440 | 0.0000 | No |
| 26165 | Gm29441 | 0.0000 | No |
| 26166 | Gm29442 | 0.0000 | No |
| 26167 | Gm29443 | 0.0000 | No |
| 26168 | Gm29444 | 0.0000 | No |
| 26169 | Gm29445 | 0.0000 | No |
| 26170 | Gm29446 | 0.0000 | No |
| 26171 | Gm29447 | 0.0000 | No |

|       |         |        |    |
|-------|---------|--------|----|
| 26172 | Gm29448 | 0.0000 | No |
| 26173 | Gm29449 | 0.0000 | No |
| 26174 | Gm29450 | 0.0000 | No |
| 26175 | Gm29451 | 0.0000 | No |
| 26176 | Gm29452 | 0.0000 | No |
| 26177 | Gm29453 | 0.0000 | No |
| 26178 | Gm29454 | 0.0000 | No |
| 26179 | Gm29455 | 0.0000 | No |
| 26180 | Gm29456 | 0.0000 | No |
| 26181 | Gm29457 | 0.0000 | No |
| 26182 | Gm29458 | 0.0000 | No |
| 26183 | Gm29459 | 0.0000 | No |
| 26184 | Gm29460 | 0.0000 | No |
| 26185 | Gm29461 | 0.0000 | No |
| 26186 | Gm29464 | 0.0000 | No |
| 26187 | Gm29466 | 0.0000 | No |
| 26188 | Gm29467 | 0.0000 | No |
| 26189 | Gm29468 | 0.0000 | No |
| 26190 | Gm29469 | 0.0000 | No |
| 26191 | Gm29470 | 0.0000 | No |
| 26192 | Gm29471 | 0.0000 | No |
| 26193 | Gm29472 | 0.0000 | No |
| 26194 | Gm29473 | 0.0000 | No |
| 26195 | Gm29474 | 0.0000 | No |
| 26196 | Gm29475 | 0.0000 | No |
| 26197 | Gm29476 | 0.0000 | No |
| 26198 | Gm29477 | 0.0000 | No |
| 26199 | Gm29479 | 0.0000 | No |
| 26200 | Gm29481 | 0.0000 | No |
| 26201 | Gm29482 | 0.0000 | No |
| 26202 | Gm29483 | 0.0000 | No |
| 26203 | Gm29484 | 0.0000 | No |
| 26204 | Gm29485 | 0.0000 | No |
| 26205 | Gm29486 | 0.0000 | No |
| 26206 | Gm29487 | 0.0000 | No |
| 26207 | Gm29488 | 0.0000 | No |
| 26208 | Gm29490 | 0.0000 | No |
| 26209 | Gm29491 | 0.0000 | No |
| 26210 | Gm29492 | 0.0000 | No |
| 26211 | Gm29495 | 0.0000 | No |
| 26212 | Gm29496 | 0.0000 | No |
| 26213 | Gm29497 | 0.0000 | No |
| 26214 | Gm29498 | 0.0000 | No |
| 26215 | Gm29499 | 0.0000 | No |
| 26216 | Gm29500 | 0.0000 | No |
| 26217 | Gm29501 | 0.0000 | No |

|       |         |        |    |
|-------|---------|--------|----|
| 26218 | Gm29502 | 0.0000 | No |
| 26219 | Gm29503 | 0.0000 | No |
| 26220 | Gm29504 | 0.0000 | No |
| 26221 | Gm29505 | 0.0000 | No |
| 26222 | Gm29506 | 0.0000 | No |
| 26223 | Gm29507 | 0.0000 | No |
| 26224 | Gm29508 | 0.0000 | No |
| 26225 | Gm29509 | 0.0000 | No |
| 26226 | Gm2951  | 0.0000 | No |
| 26227 | Gm29511 | 0.0000 | No |
| 26228 | Gm29512 | 0.0000 | No |
| 26229 | Gm29513 | 0.0000 | No |
| 26230 | Gm29514 | 0.0000 | No |
| 26231 | Gm29515 | 0.0000 | No |
| 26232 | Gm29516 | 0.0000 | No |
| 26233 | Gm29517 | 0.0000 | No |
| 26234 | Gm29518 | 0.0000 | No |
| 26235 | Gm29519 | 0.0000 | No |
| 26236 | Gm29520 | 0.0000 | No |
| 26237 | Gm29521 | 0.0000 | No |
| 26238 | Gm29522 | 0.0000 | No |
| 26239 | Gm29523 | 0.0000 | No |
| 26240 | Gm29526 | 0.0000 | No |
| 26241 | Gm29527 | 0.0000 | No |
| 26242 | Gm29528 | 0.0000 | No |
| 26243 | Gm29529 | 0.0000 | No |
| 26244 | Gm29530 | 0.0000 | No |
| 26245 | Gm29531 | 0.0000 | No |
| 26246 | Gm29532 | 0.0000 | No |
| 26247 | Gm29533 | 0.0000 | No |
| 26248 | Gm29534 | 0.0000 | No |
| 26249 | Gm29535 | 0.0000 | No |
| 26250 | Gm29536 | 0.0000 | No |
| 26251 | Gm29537 | 0.0000 | No |
| 26252 | Gm29538 | 0.0000 | No |
| 26253 | Gm29539 | 0.0000 | No |
| 26254 | Gm29540 | 0.0000 | No |
| 26255 | Gm29541 | 0.0000 | No |
| 26256 | Gm29542 | 0.0000 | No |
| 26257 | Gm29544 | 0.0000 | No |
| 26258 | Gm29545 | 0.0000 | No |
| 26259 | Gm29546 | 0.0000 | No |
| 26260 | Gm29547 | 0.0000 | No |
| 26261 | Gm29548 | 0.0000 | No |
| 26262 | Gm29549 | 0.0000 | No |
| 26263 | Gm29551 | 0.0000 | No |

|       |         |        |    |
|-------|---------|--------|----|
| 26264 | Gm29552 | 0.0000 | No |
| 26265 | Gm29553 | 0.0000 | No |
| 26266 | Gm29554 | 0.0000 | No |
| 26267 | Gm29555 | 0.0000 | No |
| 26268 | Gm29556 | 0.0000 | No |
| 26269 | Gm29557 | 0.0000 | No |
| 26270 | Gm29558 | 0.0000 | No |
| 26271 | Gm29559 | 0.0000 | No |
| 26272 | Gm2956  | 0.0000 | No |
| 26273 | Gm29560 | 0.0000 | No |
| 26274 | Gm29561 | 0.0000 | No |
| 26275 | Gm29562 | 0.0000 | No |
| 26276 | Gm29564 | 0.0000 | No |
| 26277 | Gm29565 | 0.0000 | No |
| 26278 | Gm29566 | 0.0000 | No |
| 26279 | Gm29567 | 0.0000 | No |
| 26280 | Gm29568 | 0.0000 | No |
| 26281 | Gm29569 | 0.0000 | No |
| 26282 | Gm29571 | 0.0000 | No |
| 26283 | Gm29572 | 0.0000 | No |
| 26284 | Gm29573 | 0.0000 | No |
| 26285 | Gm29574 | 0.0000 | No |
| 26286 | Gm29575 | 0.0000 | No |
| 26287 | Gm29576 | 0.0000 | No |
| 26288 | Gm29577 | 0.0000 | No |
| 26289 | Gm29578 | 0.0000 | No |
| 26290 | Gm29579 | 0.0000 | No |
| 26291 | Gm29580 | 0.0000 | No |
| 26292 | Gm29581 | 0.0000 | No |
| 26293 | Gm29582 | 0.0000 | No |
| 26294 | Gm29584 | 0.0000 | No |
| 26295 | Gm29585 | 0.0000 | No |
| 26296 | Gm29586 | 0.0000 | No |
| 26297 | Gm29587 | 0.0000 | No |
| 26298 | Gm29588 | 0.0000 | No |
| 26299 | Gm2959  | 0.0000 | No |
| 26300 | Gm29591 | 0.0000 | No |
| 26301 | Gm29593 | 0.0000 | No |
| 26302 | Gm29594 | 0.0000 | No |
| 26303 | Gm29595 | 0.0000 | No |
| 26304 | Gm29596 | 0.0000 | No |
| 26305 | Gm29597 | 0.0000 | No |
| 26306 | Gm29598 | 0.0000 | No |
| 26307 | Gm29599 | 0.0000 | No |
| 26308 | Gm29600 | 0.0000 | No |
| 26309 | Gm29602 | 0.0000 | No |

|       |         |        |    |
|-------|---------|--------|----|
| 26310 | Gm29603 | 0.0000 | No |
| 26311 | Gm29604 | 0.0000 | No |
| 26312 | Gm29605 | 0.0000 | No |
| 26313 | Gm29606 | 0.0000 | No |
| 26314 | Gm29607 | 0.0000 | No |
| 26315 | Gm29608 | 0.0000 | No |
| 26316 | Gm29609 | 0.0000 | No |
| 26317 | Gm2961  | 0.0000 | No |
| 26318 | Gm29612 | 0.0000 | No |
| 26319 | Gm29613 | 0.0000 | No |
| 26320 | Gm29614 | 0.0000 | No |
| 26321 | Gm29615 | 0.0000 | No |
| 26322 | Gm29616 | 0.0000 | No |
| 26323 | Gm29617 | 0.0000 | No |
| 26324 | Gm29618 | 0.0000 | No |
| 26325 | Gm2962  | 0.0000 | No |
| 26326 | Gm29622 | 0.0000 | No |
| 26327 | Gm29623 | 0.0000 | No |
| 26328 | Gm29624 | 0.0000 | No |
| 26329 | Gm29625 | 0.0000 | No |
| 26330 | Gm29626 | 0.0000 | No |
| 26331 | Gm29627 | 0.0000 | No |
| 26332 | Gm29628 | 0.0000 | No |
| 26333 | Gm29630 | 0.0000 | No |
| 26334 | Gm29631 | 0.0000 | No |
| 26335 | Gm29632 | 0.0000 | No |
| 26336 | Gm29633 | 0.0000 | No |
| 26337 | Gm29634 | 0.0000 | No |
| 26338 | Gm29635 | 0.0000 | No |
| 26339 | Gm29636 | 0.0000 | No |
| 26340 | Gm29637 | 0.0000 | No |
| 26341 | Gm29638 | 0.0000 | No |
| 26342 | Gm29639 | 0.0000 | No |
| 26343 | Gm2964  | 0.0000 | No |
| 26344 | Gm29640 | 0.0000 | No |
| 26345 | Gm29641 | 0.0000 | No |
| 26346 | Gm29642 | 0.0000 | No |
| 26347 | Gm29644 | 0.0000 | No |
| 26348 | Gm29645 | 0.0000 | No |
| 26349 | Gm29646 | 0.0000 | No |
| 26350 | Gm29647 | 0.0000 | No |
| 26351 | Gm29648 | 0.0000 | No |
| 26352 | Gm29650 | 0.0000 | No |
| 26353 | Gm29651 | 0.0000 | No |
| 26354 | Gm29652 | 0.0000 | No |
| 26355 | Gm29653 | 0.0000 | No |

|       |         |        |    |
|-------|---------|--------|----|
| 26356 | Gm29654 | 0.0000 | No |
| 26357 | Gm29655 | 0.0000 | No |
| 26358 | Gm29656 | 0.0000 | No |
| 26359 | Gm29657 | 0.0000 | No |
| 26360 | Gm29658 | 0.0000 | No |
| 26361 | Gm29659 | 0.0000 | No |
| 26362 | Gm2966  | 0.0000 | No |
| 26363 | Gm29660 | 0.0000 | No |
| 26364 | Gm29661 | 0.0000 | No |
| 26365 | Gm29662 | 0.0000 | No |
| 26366 | Gm29663 | 0.0000 | No |
| 26367 | Gm29665 | 0.0000 | No |
| 26368 | Gm29666 | 0.0000 | No |
| 26369 | Gm29668 | 0.0000 | No |
| 26370 | Gm29669 | 0.0000 | No |
| 26371 | Gm29670 | 0.0000 | No |
| 26372 | Gm29671 | 0.0000 | No |
| 26373 | Gm29672 | 0.0000 | No |
| 26374 | Gm29678 | 0.0000 | No |
| 26375 | Gm29704 | 0.0000 | No |
| 26376 | Gm29707 | 0.0000 | No |
| 26377 | Gm29725 | 0.0000 | No |
| 26378 | Gm29730 | 0.0000 | No |
| 26379 | Gm29735 | 0.0000 | No |
| 26380 | Gm29736 | 0.0000 | No |
| 26381 | Gm29739 | 0.0000 | No |
| 26382 | Gm2974  | 0.0000 | No |
| 26383 | Gm29740 | 0.0000 | No |
| 26384 | Gm29745 | 0.0000 | No |
| 26385 | Gm29747 | 0.0000 | No |
| 26386 | Gm2975  | 0.0000 | No |
| 26387 | Gm29754 | 0.0000 | No |
| 26388 | Gm29755 | 0.0000 | No |
| 26389 | Gm29759 | 0.0000 | No |
| 26390 | Gm2976  | 0.0000 | No |
| 26391 | Gm29763 | 0.0000 | No |
| 26392 | Gm29771 | 0.0000 | No |
| 26393 | Gm29781 | 0.0000 | No |
| 26394 | Gm29784 | 0.0000 | No |
| 26395 | Gm2979  | 0.0000 | No |
| 26396 | Gm29793 | 0.0000 | No |
| 26397 | Gm29797 | 0.0000 | No |
| 26398 | Gm29799 | 0.0000 | No |
| 26399 | Gm29803 | 0.0000 | No |
| 26400 | Gm29808 | 0.0000 | No |
| 26401 | Gm29811 | 0.0000 | No |

|       |         |        |    |
|-------|---------|--------|----|
| 26402 | Gm29813 | 0.0000 | No |
| 26403 | Gm29815 | 0.0000 | No |
| 26404 | Gm29817 | 0.0000 | No |
| 26405 | Gm29839 | 0.0000 | No |
| 26406 | Gm29848 | 0.0000 | No |
| 26407 | Gm29856 | 0.0000 | No |
| 26408 | Gm2986  | 0.0000 | No |
| 26409 | Gm29865 | 0.0000 | No |
| 26410 | Gm29866 | 0.0000 | No |
| 26411 | Gm2987  | 0.0000 | No |
| 26412 | Gm2990  | 0.0000 | No |
| 26413 | Gm2991  | 0.0000 | No |
| 26414 | Gm29920 | 0.0000 | No |
| 26415 | Gm29926 | 0.0000 | No |
| 26416 | Gm29950 | 0.0000 | No |
| 26417 | Gm2996  | 0.0000 | No |
| 26418 | Gm29977 | 0.0000 | No |
| 26419 | Gm29994 | 0.0000 | No |
| 26420 | Gm29999 | 0.0000 | No |
| 26421 | Gm2a    | 0.0000 | No |
| 26422 | Gm3002  | 0.0000 | No |
| 26423 | Gm30023 | 0.0000 | No |
| 26424 | Gm30045 | 0.0000 | No |
| 26425 | Gm3005  | 0.0000 | No |
| 26426 | Gm30074 | 0.0000 | No |
| 26427 | Gm3008  | 0.0000 | No |
| 26428 | Gm30097 | 0.0000 | No |
| 26429 | Gm3010  | 0.0000 | No |
| 26430 | Gm3012  | 0.0000 | No |
| 26431 | Gm30146 | 0.0000 | No |
| 26432 | Gm3015  | 0.0000 | No |
| 26433 | Gm3017  | 0.0000 | No |
| 26434 | Gm30173 | 0.0000 | No |
| 26435 | Gm30174 | 0.0000 | No |
| 26436 | Gm30175 | 0.0000 | No |
| 26437 | Gm30191 | 0.0000 | No |
| 26438 | Gm30196 | 0.0000 | No |
| 26439 | Gm3020  | 0.0000 | No |
| 26440 | Gm30238 | 0.0000 | No |
| 26441 | Gm3025  | 0.0000 | No |
| 26442 | Gm3027  | 0.0000 | No |
| 26443 | Gm30280 | 0.0000 | No |
| 26444 | Gm3029  | 0.0000 | No |
| 26445 | Gm30292 | 0.0000 | No |
| 26446 | Gm3030  | 0.0000 | No |
| 26447 | Gm30312 | 0.0000 | No |

|       |         |        |    |
|-------|---------|--------|----|
| 26448 | Gm30329 | 0.0000 | No |
| 26449 | Gm3033  | 0.0000 | No |
| 26450 | Gm30332 | 0.0000 | No |
| 26451 | Gm30340 | 0.0000 | No |
| 26452 | Gm30353 | 0.0000 | No |
| 26453 | Gm30382 | 0.0000 | No |
| 26454 | Gm30414 | 0.0000 | No |
| 26455 | Gm3043  | 0.0000 | No |
| 26456 | Gm30459 | 0.0000 | No |
| 26457 | Gm30484 | 0.0000 | No |
| 26458 | Gm3052  | 0.0000 | No |
| 26459 | Gm3053  | 0.0000 | No |
| 26460 | Gm3055  | 0.0000 | No |
| 26461 | Gm30557 | 0.0000 | No |
| 26462 | Gm30598 | 0.0000 | No |
| 26463 | Gm30613 | 0.0000 | No |
| 26464 | Gm30638 | 0.0000 | No |
| 26465 | Gm30652 | 0.0000 | No |
| 26466 | Gm30667 | 0.0000 | No |
| 26467 | Gm30686 | 0.0000 | No |
| 26468 | Gm30705 | 0.0000 | No |
| 26469 | Gm30708 | 0.0000 | No |
| 26470 | Gm3072  | 0.0000 | No |
| 26471 | Gm30725 | 0.0000 | No |
| 26472 | Gm30731 | 0.0000 | No |
| 26473 | Gm30737 | 0.0000 | No |
| 26474 | Gm3076  | 0.0000 | No |
| 26475 | Gm30808 | 0.0000 | No |
| 26476 | Gm3081  | 0.0000 | No |
| 26477 | Gm3084  | 0.0000 | No |
| 26478 | Gm30852 | 0.0000 | No |
| 26479 | Gm30858 | 0.0000 | No |
| 26480 | Gm3086  | 0.0000 | No |
| 26481 | Gm3089  | 0.0000 | No |
| 26482 | Gm3091  | 0.0000 | No |
| 26483 | Gm30932 | 0.0000 | No |
| 26484 | Gm30946 | 0.0000 | No |
| 26485 | Gm30948 | 0.0000 | No |
| 26486 | Gm3095  | 0.0000 | No |
| 26487 | Gm3096  | 0.0000 | No |
| 26488 | Gm30978 | 0.0000 | No |
| 26489 | Gm3102  | 0.0000 | No |
| 26490 | Gm31026 | 0.0000 | No |
| 26491 | Gm3104  | 0.0000 | No |
| 26492 | Gm31045 | 0.0000 | No |
| 26493 | Gm3106  | 0.0000 | No |



|       |         |        |    |
|-------|---------|--------|----|
| 26494 | Gm31108 | 0.0000 | No |
| 26495 | Gm3111  | 0.0000 | No |
| 26496 | Gm31121 | 0.0000 | No |
| 26497 | Gm31123 | 0.0000 | No |
| 26498 | Gm3115  | 0.0000 | No |
| 26499 | Gm31166 | 0.0000 | No |
| 26500 | Gm31186 | 0.0000 | No |
| 26501 | Gm3121  | 0.0000 | No |
| 26502 | Gm31211 | 0.0000 | No |
| 26503 | Gm3123  | 0.0000 | No |
| 26504 | Gm31230 | 0.0000 | No |
| 26505 | Gm31256 | 0.0000 | No |
| 26506 | Gm31258 | 0.0000 | No |
| 26507 | Gm31260 | 0.0000 | No |
| 26508 | Gm31266 | 0.0000 | No |
| 26509 | Gm3127  | 0.0000 | No |
| 26510 | Gm31274 | 0.0000 | No |
| 26511 | Gm31306 | 0.0000 | No |
| 26512 | Gm31314 | 0.0000 | No |
| 26513 | Gm31335 | 0.0000 | No |
| 26514 | Gm31343 | 0.0000 | No |
| 26515 | Gm31363 | 0.0000 | No |
| 26516 | Gm3138  | 0.0000 | No |
| 26517 | Gm3139  | 0.0000 | No |
| 26518 | Gm3140  | 0.0000 | No |
| 26519 | Gm31406 | 0.0000 | No |
| 26520 | Gm3141  | 0.0000 | No |
| 26521 | Gm31415 | 0.0000 | No |
| 26522 | Gm3142  | 0.0000 | No |
| 26523 | Gm31422 | 0.0000 | No |
| 26524 | Gm3143  | 0.0000 | No |
| 26525 | Gm3145  | 0.0000 | No |
| 26526 | Gm31466 | 0.0000 | No |
| 26527 | Gm3147  | 0.0000 | No |
| 26528 | Gm3148  | 0.0000 | No |
| 26529 | Gm3149  | 0.0000 | No |
| 26530 | Gm3150  | 0.0000 | No |
| 26531 | Gm31511 | 0.0000 | No |
| 26532 | Gm31520 | 0.0000 | No |
| 26533 | Gm31532 | 0.0000 | No |
| 26534 | Gm31571 | 0.0000 | No |
| 26535 | Gm31572 | 0.0000 | No |
| 26536 | Gm3159  | 0.0000 | No |
| 26537 | Gm3160  | 0.0000 | No |
| 26538 | Gm3164  | 0.0000 | No |
| 26539 | Gm31663 | 0.0000 | No |

|       |         |        |    |
|-------|---------|--------|----|
| 26540 | Gm31678 | 0.0000 | No |
| 26541 | Gm3170  | 0.0000 | No |
| 26542 | Gm31728 | 0.0000 | No |
| 26543 | Gm3173  | 0.0000 | No |
| 26544 | Gm31747 | 0.0000 | No |
| 26545 | Gm31748 | 0.0000 | No |
| 26546 | Gm31749 | 0.0000 | No |
| 26547 | Gm3176  | 0.0000 | No |
| 26548 | Gm3182  | 0.0000 | No |
| 26549 | Gm3183  | 0.0000 | No |
| 26550 | Gm31861 | 0.0000 | No |
| 26551 | Gm3189  | 0.0000 | No |
| 26552 | Gm31898 | 0.0000 | No |
| 26553 | Gm3191  | 0.0000 | No |
| 26554 | Gm31925 | 0.0000 | No |
| 26555 | Gm3194  | 0.0000 | No |
| 26556 | Gm31941 | 0.0000 | No |
| 26557 | Gm31942 | 0.0000 | No |
| 26558 | Gm3198  | 0.0000 | No |
| 26559 | Gm3200  | 0.0000 | No |
| 26560 | Gm3203  | 0.0000 | No |
| 26561 | Gm32033 | 0.0000 | No |
| 26562 | Gm32072 | 0.0000 | No |
| 26563 | Gm3208  | 0.0000 | No |
| 26564 | Gm32102 | 0.0000 | No |
| 26565 | Gm3211  | 0.0000 | No |
| 26566 | Gm32114 | 0.0000 | No |
| 26567 | Gm32158 | 0.0000 | No |
| 26568 | Gm3216  | 0.0000 | No |
| 26569 | Gm32180 | 0.0000 | No |
| 26570 | Gm32181 | 0.0000 | No |
| 26571 | Gm32200 | 0.0000 | No |
| 26572 | Gm3221  | 0.0000 | No |
| 26573 | Gm3222  | 0.0000 | No |
| 26574 | Gm32250 | 0.0000 | No |
| 26575 | Gm32295 | 0.0000 | No |
| 26576 | Gm32308 | 0.0000 | No |
| 26577 | Gm3233  | 0.0000 | No |
| 26578 | Gm32340 | 0.0000 | No |
| 26579 | Gm32347 | 0.0000 | No |
| 26580 | Gm3235  | 0.0000 | No |
| 26581 | Gm3238  | 0.0000 | No |
| 26582 | Gm3239  | 0.0000 | No |
| 26583 | Gm32391 | 0.0000 | No |
| 26584 | Gm3242  | 0.0000 | No |
| 26585 | Gm3244  | 0.0000 | No |

|       |         |        |    |
|-------|---------|--------|----|
| 26586 | Gm32444 | 0.0000 | No |
| 26587 | Gm32447 | 0.0000 | No |
| 26588 | Gm32453 | 0.0000 | No |
| 26589 | Gm32460 | 0.0000 | No |
| 26590 | Gm3248  | 0.0000 | No |
| 26591 | Gm32496 | 0.0000 | No |
| 26592 | Gm3250  | 0.0000 | No |
| 26593 | Gm3252  | 0.0000 | No |
| 26594 | Gm32536 | 0.0000 | No |
| 26595 | Gm32540 | 0.0000 | No |
| 26596 | Gm32569 | 0.0000 | No |
| 26597 | Gm3257  | 0.0000 | No |
| 26598 | Gm3259  | 0.0000 | No |
| 26599 | Gm32592 | 0.0000 | No |
| 26600 | Gm3261  | 0.0000 | No |
| 26601 | Gm3264  | 0.0000 | No |
| 26602 | Gm3267  | 0.0000 | No |
| 26603 | Gm3269  | 0.0000 | No |
| 26604 | Gm32710 | 0.0000 | No |
| 26605 | Gm3272  | 0.0000 | No |
| 26606 | Gm32742 | 0.0000 | No |
| 26607 | Gm3275  | 0.0000 | No |
| 26608 | Gm32754 | 0.0000 | No |
| 26609 | Gm3278  | 0.0000 | No |
| 26610 | Gm32780 | 0.0000 | No |
| 26611 | Gm3286  | 0.0000 | No |
| 26612 | Gm3287  | 0.0000 | No |
| 26613 | Gm3289  | 0.0000 | No |
| 26614 | Gm32916 | 0.0000 | No |
| 26615 | Gm32921 | 0.0000 | No |
| 26616 | Gm3294  | 0.0000 | No |
| 26617 | Gm32950 | 0.0000 | No |
| 26618 | Gm32975 | 0.0000 | No |
| 26619 | Gm3298  | 0.0000 | No |
| 26620 | Gm32983 | 0.0000 | No |
| 26621 | Gm32996 | 0.0000 | No |
| 26622 | Gm32999 | 0.0000 | No |
| 26623 | Gm3302  | 0.0000 | No |
| 26624 | Gm33045 | 0.0000 | No |
| 26625 | Gm33051 | 0.0000 | No |
| 26626 | Gm3307  | 0.0000 | No |
| 26627 | Gm33080 | 0.0000 | No |
| 26628 | Gm33096 | 0.0000 | No |
| 26629 | Gm33112 | 0.0000 | No |
| 26630 | Gm33163 | 0.0000 | No |
| 26631 | Gm3317  | 0.0000 | No |

|       |         |        |    |
|-------|---------|--------|----|
| 26632 | Gm33191 | 0.0000 | No |
| 26633 | Gm33206 | 0.0000 | No |
| 26634 | Gm3321  | 0.0000 | No |
| 26635 | Gm33222 | 0.0000 | No |
| 26636 | Gm33248 | 0.0000 | No |
| 26637 | Gm3326  | 0.0000 | No |
| 26638 | Gm3327  | 0.0000 | No |
| 26639 | Gm33280 | 0.0000 | No |
| 26640 | Gm3331  | 0.0000 | No |
| 26641 | Gm3332  | 0.0000 | No |
| 26642 | Gm33320 | 0.0000 | No |
| 26643 | Gm33354 | 0.0000 | No |
| 26644 | Gm3336  | 0.0000 | No |
| 26645 | Gm33366 | 0.0000 | No |
| 26646 | Gm33370 | 0.0000 | No |
| 26647 | Gm3339  | 0.0000 | No |
| 26648 | Gm3344  | 0.0000 | No |
| 26649 | Gm33466 | 0.0000 | No |
| 26650 | Gm3348  | 0.0000 | No |
| 26651 | Gm33533 | 0.0000 | No |
| 26652 | Gm3355  | 0.0000 | No |
| 26653 | Gm33571 | 0.0000 | No |
| 26654 | Gm336   | 0.0000 | No |
| 26655 | Gm33601 | 0.0000 | No |
| 26656 | Gm3362  | 0.0000 | No |
| 26657 | Gm33651 | 0.0000 | No |
| 26658 | Gm3370  | 0.0000 | No |
| 26659 | Gm33707 | 0.0000 | No |
| 26660 | Gm3371  | 0.0000 | No |
| 26661 | Gm3372  | 0.0000 | No |
| 26662 | Gm3373  | 0.0000 | No |
| 26663 | Gm3375  | 0.0000 | No |
| 26664 | Gm3376  | 0.0000 | No |
| 26665 | Gm33815 | 0.0000 | No |
| 26666 | Gm33819 | 0.0000 | No |
| 26667 | Gm3383  | 0.0000 | No |
| 26668 | Gm33866 | 0.0000 | No |
| 26669 | Gm33882 | 0.0000 | No |
| 26670 | Gm33952 | 0.0000 | No |
| 26671 | Gm33954 | 0.0000 | No |
| 26672 | Gm33962 | 0.0000 | No |
| 26673 | Gm33969 | 0.0000 | No |
| 26674 | Gm33973 | 0.0000 | No |
| 26675 | Gm340   | 0.0000 | No |
| 26676 | Gm34015 | 0.0000 | No |
| 26677 | Gm3402  | 0.0000 | No |

|       |         |        |    |
|-------|---------|--------|----|
| 26678 | Gm34023 | 0.0000 | No |
| 26679 | Gm3404  | 0.0000 | No |
| 26680 | Gm34066 | 0.0000 | No |
| 26681 | Gm34068 | 0.0000 | No |
| 26682 | Gm34073 | 0.0000 | No |
| 26683 | Gm34082 | 0.0000 | No |
| 26684 | Gm3409  | 0.0000 | No |
| 26685 | Gm34096 | 0.0000 | No |
| 26686 | Gm34106 | 0.0000 | No |
| 26687 | Gm3411  | 0.0000 | No |
| 26688 | Gm34121 | 0.0000 | No |
| 26689 | Gm34139 | 0.0000 | No |
| 26690 | Gm34144 | 0.0000 | No |
| 26691 | Gm34149 | 0.0000 | No |
| 26692 | Gm3415  | 0.0000 | No |
| 26693 | Gm34176 | 0.0000 | No |
| 26694 | Gm34217 | 0.0000 | No |
| 26695 | Gm34224 | 0.0000 | No |
| 26696 | Gm3424  | 0.0000 | No |
| 26697 | Gm34240 | 0.0000 | No |
| 26698 | Gm34248 | 0.0000 | No |
| 26699 | Gm34267 | 0.0000 | No |
| 26700 | Gm34272 | 0.0000 | No |
| 26701 | Gm34274 | 0.0000 | No |
| 26702 | Gm3428  | 0.0000 | No |
| 26703 | Gm34280 | 0.0000 | No |
| 26704 | Gm34294 | 0.0000 | No |
| 26705 | Gm34302 | 0.0000 | No |
| 26706 | Gm34314 | 0.0000 | No |
| 26707 | Gm34333 | 0.0000 | No |
| 26708 | Gm34342 | 0.0000 | No |
| 26709 | Gm3436  | 0.0000 | No |
| 26710 | Gm34379 | 0.0000 | No |
| 26711 | Gm3443  | 0.0000 | No |
| 26712 | Gm3448  | 0.0000 | No |
| 26713 | Gm3453  | 0.0000 | No |
| 26714 | Gm3454  | 0.0000 | No |
| 26715 | Gm3455  | 0.0000 | No |
| 26716 | Gm34550 | 0.0000 | No |
| 26717 | Gm3460  | 0.0000 | No |
| 26718 | Gm34653 | 0.0000 | No |
| 26719 | Gm3466  | 0.0000 | No |
| 26720 | Gm3470  | 0.0000 | No |
| 26721 | Gm34716 | 0.0000 | No |
| 26722 | Gm34727 | 0.0000 | No |
| 26723 | Gm34732 | 0.0000 | No |

|       |         |        |    |
|-------|---------|--------|----|
| 26724 | Gm3476  | 0.0000 | No |
| 26725 | Gm34768 | 0.0000 | No |
| 26726 | Gm34779 | 0.0000 | No |
| 26727 | Gm34780 | 0.0000 | No |
| 26728 | Gm34783 | 0.0000 | No |
| 26729 | Gm34821 | 0.0000 | No |
| 26730 | Gm3486  | 0.0000 | No |
| 26731 | Gm34866 | 0.0000 | No |
| 26732 | Gm3488  | 0.0000 | No |
| 26733 | Gm34882 | 0.0000 | No |
| 26734 | Gm3489  | 0.0000 | No |
| 26735 | Gm3496  | 0.0000 | No |
| 26736 | Gm34964 | 0.0000 | No |
| 26737 | Gm3500  | 0.0000 | No |
| 26738 | Gm35000 | 0.0000 | No |
| 26739 | Gm35013 | 0.0000 | No |
| 26740 | Gm35025 | 0.0000 | No |
| 26741 | Gm35040 | 0.0000 | No |
| 26742 | Gm35060 | 0.0000 | No |
| 26743 | Gm35067 | 0.0000 | No |
| 26744 | Gm35070 | 0.0000 | No |
| 26745 | Gm3508  | 0.0000 | No |
| 26746 | Gm3510  | 0.0000 | No |
| 26747 | Gm35106 | 0.0000 | No |
| 26748 | Gm35108 | 0.0000 | No |
| 26749 | Gm3511  | 0.0000 | No |
| 26750 | Gm3512  | 0.0000 | No |
| 26751 | Gm3513  | 0.0000 | No |
| 26752 | Gm35134 | 0.0000 | No |
| 26753 | Gm35147 | 0.0000 | No |
| 26754 | Gm35191 | 0.0000 | No |
| 26755 | Gm35212 | 0.0000 | No |
| 26756 | Gm35216 | 0.0000 | No |
| 26757 | Gm3526  | 0.0000 | No |
| 26758 | Gm35299 | 0.0000 | No |
| 26759 | Gm3531  | 0.0000 | No |
| 26760 | Gm35315 | 0.0000 | No |
| 26761 | Gm3532  | 0.0000 | No |
| 26762 | Gm35323 | 0.0000 | No |
| 26763 | Gm35339 | 0.0000 | No |
| 26764 | Gm3534  | 0.0000 | No |
| 26765 | Gm35368 | 0.0000 | No |
| 26766 | Gm35386 | 0.0000 | No |
| 26767 | Gm3542  | 0.0000 | No |
| 26768 | Gm3543  | 0.0000 | No |
| 26769 | Gm3544  | 0.0000 | No |

|       |         |        |    |
|-------|---------|--------|----|
| 26770 | Gm3549  | 0.0000 | No |
| 26771 | Gm3550  | 0.0000 | No |
| 26772 | Gm35507 | 0.0000 | No |
| 26773 | Gm3551  | 0.0000 | No |
| 26774 | Gm35549 | 0.0000 | No |
| 26775 | Gm3555  | 0.0000 | No |
| 26776 | Gm35570 | 0.0000 | No |
| 26777 | Gm3558  | 0.0000 | No |
| 26778 | Gm35584 | 0.0000 | No |
| 26779 | Gm35625 | 0.0000 | No |
| 26780 | Gm3563  | 0.0000 | No |
| 26781 | Gm35648 | 0.0000 | No |
| 26782 | Gm35670 | 0.0000 | No |
| 26783 | Gm35702 | 0.0000 | No |
| 26784 | Gm3571  | 0.0000 | No |
| 26785 | Gm35713 | 0.0000 | No |
| 26786 | Gm3573  | 0.0000 | No |
| 26787 | Gm35736 | 0.0000 | No |
| 26788 | Gm35801 | 0.0000 | No |
| 26789 | Gm3584  | 0.0000 | No |
| 26790 | Gm35842 | 0.0000 | No |
| 26791 | Gm35843 | 0.0000 | No |
| 26792 | Gm3585  | 0.0000 | No |
| 26793 | Gm35876 | 0.0000 | No |
| 26794 | Gm3591  | 0.0000 | No |
| 26795 | Gm35911 | 0.0000 | No |
| 26796 | Gm35931 | 0.0000 | No |
| 26797 | Gm3594  | 0.0000 | No |
| 26798 | Gm35955 | 0.0000 | No |
| 26799 | Gm35960 | 0.0000 | No |
| 26800 | Gm35986 | 0.0000 | No |
| 26801 | Gm36011 | 0.0000 | No |
| 26802 | Gm3604  | 0.0000 | No |
| 26803 | Gm36047 | 0.0000 | No |
| 26804 | Gm3605  | 0.0000 | No |
| 26805 | Gm3608  | 0.0000 | No |
| 26806 | Gm3611  | 0.0000 | No |
| 26807 | Gm3616  | 0.0000 | No |
| 26808 | Gm3617  | 0.0000 | No |
| 26809 | Gm3618  | 0.0000 | No |
| 26810 | Gm36186 | 0.0000 | No |
| 26811 | Gm36189 | 0.0000 | No |
| 26812 | Gm362   | 0.0000 | No |
| 26813 | Gm36210 | 0.0000 | No |
| 26814 | Gm36211 | 0.0000 | No |
| 26815 | Gm3623  | 0.0000 | No |

|       |         |        |    |
|-------|---------|--------|----|
| 26816 | Gm3625  | 0.0000 | No |
| 26817 | Gm36259 | 0.0000 | No |
| 26818 | Gm36261 | 0.0000 | No |
| 26819 | Gm36266 | 0.0000 | No |
| 26820 | Gm3629  | 0.0000 | No |
| 26821 | Gm36307 | 0.0000 | No |
| 26822 | Gm3633  | 0.0000 | No |
| 26823 | Gm36345 | 0.0000 | No |
| 26824 | Gm3636  | 0.0000 | No |
| 26825 | Gm36378 | 0.0000 | No |
| 26826 | Gm36382 | 0.0000 | No |
| 26827 | Gm36388 | 0.0000 | No |
| 26828 | Gm36398 | 0.0000 | No |
| 26829 | Gm364   | 0.0000 | No |
| 26830 | Gm36401 | 0.0000 | No |
| 26831 | Gm36445 | 0.0000 | No |
| 26832 | Gm36448 | 0.0000 | No |
| 26833 | Gm3646  | 0.0000 | No |
| 26834 | Gm36467 | 0.0000 | No |
| 26835 | Gm36468 | 0.0000 | No |
| 26836 | Gm3650  | 0.0000 | No |
| 26837 | Gm36520 | 0.0000 | No |
| 26838 | Gm36527 | 0.0000 | No |
| 26839 | Gm36536 | 0.0000 | No |
| 26840 | Gm36551 | 0.0000 | No |
| 26841 | Gm36569 | 0.0000 | No |
| 26842 | Gm3657  | 0.0000 | No |
| 26843 | Gm36633 | 0.0000 | No |
| 26844 | Gm36638 | 0.0000 | No |
| 26845 | Gm3665  | 0.0000 | No |
| 26846 | Gm36669 | 0.0000 | No |
| 26847 | Gm3669  | 0.0000 | No |
| 26848 | Gm36694 | 0.0000 | No |
| 26849 | Gm3671  | 0.0000 | No |
| 26850 | Gm36728 | 0.0000 | No |
| 26851 | Gm36737 | 0.0000 | No |
| 26852 | Gm3675  | 0.0000 | No |
| 26853 | Gm3676  | 0.0000 | No |
| 26854 | Gm36776 | 0.0000 | No |
| 26855 | Gm36782 | 0.0000 | No |
| 26856 | Gm36793 | 0.0000 | No |
| 26857 | Gm3681  | 0.0000 | No |
| 26858 | Gm36814 | 0.0000 | No |
| 26859 | Gm3683  | 0.0000 | No |
| 26860 | Gm36831 | 0.0000 | No |
| 26861 | Gm36840 | 0.0000 | No |



|       |         |        |    |
|-------|---------|--------|----|
| 26862 | Gm3685  | 0.0000 | No |
| 26863 | Gm36858 | 0.0000 | No |
| 26864 | Gm36864 | 0.0000 | No |
| 26865 | Gm36866 | 0.0000 | No |
| 26866 | Gm36888 | 0.0000 | No |
| 26867 | Gm36891 | 0.0000 | No |
| 26868 | Gm3690  | 0.0000 | No |
| 26869 | Gm36928 | 0.0000 | No |
| 26870 | Gm3693  | 0.0000 | No |
| 26871 | Gm36930 | 0.0000 | No |
| 26872 | Gm36931 | 0.0000 | No |
| 26873 | Gm36933 | 0.0000 | No |
| 26874 | Gm36934 | 0.0000 | No |
| 26875 | Gm36935 | 0.0000 | No |
| 26876 | Gm36936 | 0.0000 | No |
| 26877 | Gm36937 | 0.0000 | No |
| 26878 | Gm36938 | 0.0000 | No |
| 26879 | Gm36940 | 0.0000 | No |
| 26880 | Gm36941 | 0.0000 | No |
| 26881 | Gm36943 | 0.0000 | No |
| 26882 | Gm36944 | 0.0000 | No |
| 26883 | Gm36945 | 0.0000 | No |
| 26884 | Gm36946 | 0.0000 | No |
| 26885 | Gm36947 | 0.0000 | No |
| 26886 | Gm36948 | 0.0000 | No |
| 26887 | Gm36949 | 0.0000 | No |
| 26888 | Gm3695  | 0.0000 | No |
| 26889 | Gm36950 | 0.0000 | No |
| 26890 | Gm36951 | 0.0000 | No |
| 26891 | Gm36952 | 0.0000 | No |
| 26892 | Gm36953 | 0.0000 | No |
| 26893 | Gm36954 | 0.0000 | No |
| 26894 | Gm36955 | 0.0000 | No |
| 26895 | Gm36956 | 0.0000 | No |
| 26896 | Gm36957 | 0.0000 | No |
| 26897 | Gm36958 | 0.0000 | No |
| 26898 | Gm36960 | 0.0000 | No |
| 26899 | Gm36962 | 0.0000 | No |
| 26900 | Gm36963 | 0.0000 | No |
| 26901 | Gm36964 | 0.0000 | No |
| 26902 | Gm36965 | 0.0000 | No |
| 26903 | Gm36966 | 0.0000 | No |
| 26904 | Gm36967 | 0.0000 | No |
| 26905 | Gm36968 | 0.0000 | No |
| 26906 | Gm36970 | 0.0000 | No |
| 26907 | Gm36971 | 0.0000 | No |

|       |         |        |    |
|-------|---------|--------|----|
| 26908 | Gm36972 | 0.0000 | No |
| 26909 | Gm36974 | 0.0000 | No |
| 26910 | Gm36975 | 0.0000 | No |
| 26911 | Gm36976 | 0.0000 | No |
| 26912 | Gm36978 | 0.0000 | No |
| 26913 | Gm36979 | 0.0000 | No |
| 26914 | Gm36980 | 0.0000 | No |
| 26915 | Gm36981 | 0.0000 | No |
| 26916 | Gm36982 | 0.0000 | No |
| 26917 | Gm36983 | 0.0000 | No |
| 26918 | Gm36984 | 0.0000 | No |
| 26919 | Gm36985 | 0.0000 | No |
| 26920 | Gm36986 | 0.0000 | No |
| 26921 | Gm36987 | 0.0000 | No |
| 26922 | Gm36989 | 0.0000 | No |
| 26923 | Gm3699  | 0.0000 | No |
| 26924 | Gm36990 | 0.0000 | No |
| 26925 | Gm36991 | 0.0000 | No |
| 26926 | Gm36993 | 0.0000 | No |
| 26927 | Gm36994 | 0.0000 | No |
| 26928 | Gm36995 | 0.0000 | No |
| 26929 | Gm36996 | 0.0000 | No |
| 26930 | Gm36997 | 0.0000 | No |
| 26931 | Gm36998 | 0.0000 | No |
| 26932 | Gm37000 | 0.0000 | No |
| 26933 | Gm37001 | 0.0000 | No |
| 26934 | Gm37002 | 0.0000 | No |
| 26935 | Gm37003 | 0.0000 | No |
| 26936 | Gm37004 | 0.0000 | No |
| 26937 | Gm37005 | 0.0000 | No |
| 26938 | Gm37006 | 0.0000 | No |
| 26939 | Gm37007 | 0.0000 | No |
| 26940 | Gm37008 | 0.0000 | No |
| 26941 | Gm37009 | 0.0000 | No |
| 26942 | Gm3701  | 0.0000 | No |
| 26943 | Gm37010 | 0.0000 | No |
| 26944 | Gm37011 | 0.0000 | No |
| 26945 | Gm37012 | 0.0000 | No |
| 26946 | Gm37013 | 0.0000 | No |
| 26947 | Gm37014 | 0.0000 | No |
| 26948 | Gm37015 | 0.0000 | No |
| 26949 | Gm37016 | 0.0000 | No |
| 26950 | Gm37017 | 0.0000 | No |
| 26951 | Gm37018 | 0.0000 | No |
| 26952 | Gm37019 | 0.0000 | No |
| 26953 | Gm3702  | 0.0000 | No |

|       |         |        |    |
|-------|---------|--------|----|
| 26954 | Gm37020 | 0.0000 | No |
| 26955 | Gm37021 | 0.0000 | No |
| 26956 | Gm37023 | 0.0000 | No |
| 26957 | Gm37025 | 0.0000 | No |
| 26958 | Gm37026 | 0.0000 | No |
| 26959 | Gm37027 | 0.0000 | No |
| 26960 | Gm37028 | 0.0000 | No |
| 26961 | Gm37029 | 0.0000 | No |
| 26962 | Gm37030 | 0.0000 | No |
| 26963 | Gm37031 | 0.0000 | No |
| 26964 | Gm37032 | 0.0000 | No |
| 26965 | Gm37033 | 0.0000 | No |
| 26966 | Gm37034 | 0.0000 | No |
| 26967 | Gm37036 | 0.0000 | No |
| 26968 | Gm37037 | 0.0000 | No |
| 26969 | Gm37039 | 0.0000 | No |
| 26970 | Gm37040 | 0.0000 | No |
| 26971 | Gm37041 | 0.0000 | No |
| 26972 | Gm37042 | 0.0000 | No |
| 26973 | Gm37043 | 0.0000 | No |
| 26974 | Gm37044 | 0.0000 | No |
| 26975 | Gm37045 | 0.0000 | No |
| 26976 | Gm37049 | 0.0000 | No |
| 26977 | Gm37050 | 0.0000 | No |
| 26978 | Gm37052 | 0.0000 | No |
| 26979 | Gm37053 | 0.0000 | No |
| 26980 | Gm37054 | 0.0000 | No |
| 26981 | Gm37055 | 0.0000 | No |
| 26982 | Gm37056 | 0.0000 | No |
| 26983 | Gm37057 | 0.0000 | No |
| 26984 | Gm37058 | 0.0000 | No |
| 26985 | Gm37059 | 0.0000 | No |
| 26986 | Gm3706  | 0.0000 | No |
| 26987 | Gm37060 | 0.0000 | No |
| 26988 | Gm37061 | 0.0000 | No |
| 26989 | Gm37062 | 0.0000 | No |
| 26990 | Gm37063 | 0.0000 | No |
| 26991 | Gm37064 | 0.0000 | No |
| 26992 | Gm37067 | 0.0000 | No |
| 26993 | Gm37069 | 0.0000 | No |
| 26994 | Gm37070 | 0.0000 | No |
| 26995 | Gm37071 | 0.0000 | No |
| 26996 | Gm37072 | 0.0000 | No |
| 26997 | Gm37073 | 0.0000 | No |
| 26998 | Gm37074 | 0.0000 | No |
| 26999 | Gm37075 | 0.0000 | No |

|       |         |        |    |
|-------|---------|--------|----|
| 27000 | Gm37076 | 0.0000 | No |
| 27001 | Gm37078 | 0.0000 | No |
| 27002 | Gm37079 | 0.0000 | No |
| 27003 | Gm37080 | 0.0000 | No |
| 27004 | Gm37081 | 0.0000 | No |
| 27005 | Gm37083 | 0.0000 | No |
| 27006 | Gm37084 | 0.0000 | No |
| 27007 | Gm37085 | 0.0000 | No |
| 27008 | Gm37087 | 0.0000 | No |
| 27009 | Gm37088 | 0.0000 | No |
| 27010 | Gm37089 | 0.0000 | No |
| 27011 | Gm37090 | 0.0000 | No |
| 27012 | Gm37091 | 0.0000 | No |
| 27013 | Gm37092 | 0.0000 | No |
| 27014 | Gm37093 | 0.0000 | No |
| 27015 | Gm37094 | 0.0000 | No |
| 27016 | Gm37095 | 0.0000 | No |
| 27017 | Gm37096 | 0.0000 | No |
| 27018 | Gm37097 | 0.0000 | No |
| 27019 | Gm37098 | 0.0000 | No |
| 27020 | Gm371   | 0.0000 | No |
| 27021 | Gm37100 | 0.0000 | No |
| 27022 | Gm37101 | 0.0000 | No |
| 27023 | Gm37102 | 0.0000 | No |
| 27024 | Gm37103 | 0.0000 | No |
| 27025 | Gm37104 | 0.0000 | No |
| 27026 | Gm37105 | 0.0000 | No |
| 27027 | Gm37106 | 0.0000 | No |
| 27028 | Gm37107 | 0.0000 | No |
| 27029 | Gm37108 | 0.0000 | No |
| 27030 | Gm37109 | 0.0000 | No |
| 27031 | Gm37110 | 0.0000 | No |
| 27032 | Gm37111 | 0.0000 | No |
| 27033 | Gm37112 | 0.0000 | No |
| 27034 | Gm37114 | 0.0000 | No |
| 27035 | Gm37115 | 0.0000 | No |
| 27036 | Gm37116 | 0.0000 | No |
| 27037 | Gm37117 | 0.0000 | No |
| 27038 | Gm37118 | 0.0000 | No |
| 27039 | Gm37119 | 0.0000 | No |
| 27040 | Gm3712  | 0.0000 | No |
| 27041 | Gm37120 | 0.0000 | No |
| 27042 | Gm37122 | 0.0000 | No |
| 27043 | Gm37123 | 0.0000 | No |
| 27044 | Gm37124 | 0.0000 | No |
| 27045 | Gm37126 | 0.0000 | No |

|       |         |        |    |
|-------|---------|--------|----|
| 27046 | Gm37127 | 0.0000 | No |
| 27047 | Gm37128 | 0.0000 | No |
| 27048 | Gm37129 | 0.0000 | No |
| 27049 | Gm37130 | 0.0000 | No |
| 27050 | Gm37132 | 0.0000 | No |
| 27051 | Gm37133 | 0.0000 | No |
| 27052 | Gm37135 | 0.0000 | No |
| 27053 | Gm37136 | 0.0000 | No |
| 27054 | Gm37138 | 0.0000 | No |
| 27055 | Gm37139 | 0.0000 | No |
| 27056 | Gm37140 | 0.0000 | No |
| 27057 | Gm37141 | 0.0000 | No |
| 27058 | Gm37142 | 0.0000 | No |
| 27059 | Gm37143 | 0.0000 | No |
| 27060 | Gm37144 | 0.0000 | No |
| 27061 | Gm37145 | 0.0000 | No |
| 27062 | Gm37146 | 0.0000 | No |
| 27063 | Gm37147 | 0.0000 | No |
| 27064 | Gm37149 | 0.0000 | No |
| 27065 | Gm3715  | 0.0000 | No |
| 27066 | Gm37152 | 0.0000 | No |
| 27067 | Gm37153 | 0.0000 | No |
| 27068 | Gm37154 | 0.0000 | No |
| 27069 | Gm37155 | 0.0000 | No |
| 27070 | Gm37157 | 0.0000 | No |
| 27071 | Gm37158 | 0.0000 | No |
| 27072 | Gm37159 | 0.0000 | No |
| 27073 | Gm3716  | 0.0000 | No |
| 27074 | Gm37160 | 0.0000 | No |
| 27075 | Gm37161 | 0.0000 | No |
| 27076 | Gm37162 | 0.0000 | No |
| 27077 | Gm37163 | 0.0000 | No |
| 27078 | Gm37164 | 0.0000 | No |
| 27079 | Gm37165 | 0.0000 | No |
| 27080 | Gm37166 | 0.0000 | No |
| 27081 | Gm37167 | 0.0000 | No |
| 27082 | Gm37168 | 0.0000 | No |
| 27083 | Gm37171 | 0.0000 | No |
| 27084 | Gm37172 | 0.0000 | No |
| 27085 | Gm37173 | 0.0000 | No |
| 27086 | Gm37174 | 0.0000 | No |
| 27087 | Gm37176 | 0.0000 | No |
| 27088 | Gm37177 | 0.0000 | No |
| 27089 | Gm37178 | 0.0000 | No |
| 27090 | Gm37179 | 0.0000 | No |
| 27091 | Gm37181 | 0.0000 | No |

|       |         |        |    |
|-------|---------|--------|----|
| 27092 | Gm37183 | 0.0000 | No |
| 27093 | Gm37184 | 0.0000 | No |
| 27094 | Gm37185 | 0.0000 | No |
| 27095 | Gm37186 | 0.0000 | No |
| 27096 | Gm37187 | 0.0000 | No |
| 27097 | Gm37189 | 0.0000 | No |
| 27098 | Gm3719  | 0.0000 | No |
| 27099 | Gm37190 | 0.0000 | No |
| 27100 | Gm37191 | 0.0000 | No |
| 27101 | Gm37193 | 0.0000 | No |
| 27102 | Gm37194 | 0.0000 | No |
| 27103 | Gm37195 | 0.0000 | No |
| 27104 | Gm37196 | 0.0000 | No |
| 27105 | Gm37197 | 0.0000 | No |
| 27106 | Gm37199 | 0.0000 | No |
| 27107 | Gm37200 | 0.0000 | No |
| 27108 | Gm37201 | 0.0000 | No |
| 27109 | Gm37203 | 0.0000 | No |
| 27110 | Gm37204 | 0.0000 | No |
| 27111 | Gm37205 | 0.0000 | No |
| 27112 | Gm37206 | 0.0000 | No |
| 27113 | Gm37207 | 0.0000 | No |
| 27114 | Gm37209 | 0.0000 | No |
| 27115 | Gm37210 | 0.0000 | No |
| 27116 | Gm37211 | 0.0000 | No |
| 27117 | Gm37212 | 0.0000 | No |
| 27118 | Gm37213 | 0.0000 | No |
| 27119 | Gm37214 | 0.0000 | No |
| 27120 | Gm37215 | 0.0000 | No |
| 27121 | Gm37216 | 0.0000 | No |
| 27122 | Gm37217 | 0.0000 | No |
| 27123 | Gm37218 | 0.0000 | No |
| 27124 | Gm37219 | 0.0000 | No |
| 27125 | Gm37220 | 0.0000 | No |
| 27126 | Gm37221 | 0.0000 | No |
| 27127 | Gm37222 | 0.0000 | No |
| 27128 | Gm37223 | 0.0000 | No |
| 27129 | Gm37224 | 0.0000 | No |
| 27130 | Gm37225 | 0.0000 | No |
| 27131 | Gm37227 | 0.0000 | No |
| 27132 | Gm37229 | 0.0000 | No |
| 27133 | Gm37230 | 0.0000 | No |
| 27134 | Gm37231 | 0.0000 | No |
| 27135 | Gm37232 | 0.0000 | No |
| 27136 | Gm37233 | 0.0000 | No |
| 27137 | Gm37234 | 0.0000 | No |

|       |         |        |    |
|-------|---------|--------|----|
| 27138 | Gm37235 | 0.0000 | No |
| 27139 | Gm37236 | 0.0000 | No |
| 27140 | Gm37237 | 0.0000 | No |
| 27141 | Gm37238 | 0.0000 | No |
| 27142 | Gm37239 | 0.0000 | No |
| 27143 | Gm3724  | 0.0000 | No |
| 27144 | Gm37240 | 0.0000 | No |
| 27145 | Gm37241 | 0.0000 | No |
| 27146 | Gm37242 | 0.0000 | No |
| 27147 | Gm37244 | 0.0000 | No |
| 27148 | Gm37246 | 0.0000 | No |
| 27149 | Gm37247 | 0.0000 | No |
| 27150 | Gm37248 | 0.0000 | No |
| 27151 | Gm37249 | 0.0000 | No |
| 27152 | Gm37250 | 0.0000 | No |
| 27153 | Gm37252 | 0.0000 | No |
| 27154 | Gm37253 | 0.0000 | No |
| 27155 | Gm37254 | 0.0000 | No |
| 27156 | Gm37255 | 0.0000 | No |
| 27157 | Gm37256 | 0.0000 | No |
| 27158 | Gm37258 | 0.0000 | No |
| 27159 | Gm37259 | 0.0000 | No |
| 27160 | Gm3726  | 0.0000 | No |
| 27161 | Gm37261 | 0.0000 | No |
| 27162 | Gm37262 | 0.0000 | No |
| 27163 | Gm37263 | 0.0000 | No |
| 27164 | Gm37265 | 0.0000 | No |
| 27165 | Gm37266 | 0.0000 | No |
| 27166 | Gm37268 | 0.0000 | No |
| 27167 | Gm37269 | 0.0000 | No |
| 27168 | Gm37270 | 0.0000 | No |
| 27169 | Gm37271 | 0.0000 | No |
| 27170 | Gm37273 | 0.0000 | No |
| 27171 | Gm37274 | 0.0000 | No |
| 27172 | Gm37275 | 0.0000 | No |
| 27173 | Gm37276 | 0.0000 | No |
| 27174 | Gm37277 | 0.0000 | No |
| 27175 | Gm37278 | 0.0000 | No |
| 27176 | Gm37279 | 0.0000 | No |
| 27177 | Gm37280 | 0.0000 | No |
| 27178 | Gm37281 | 0.0000 | No |
| 27179 | Gm37282 | 0.0000 | No |
| 27180 | Gm37283 | 0.0000 | No |
| 27181 | Gm37284 | 0.0000 | No |
| 27182 | Gm37285 | 0.0000 | No |
| 27183 | Gm37286 | 0.0000 | No |

|       |         |        |    |
|-------|---------|--------|----|
| 27184 | Gm37287 | 0.0000 | No |
| 27185 | Gm37288 | 0.0000 | No |
| 27186 | Gm37289 | 0.0000 | No |
| 27187 | Gm37290 | 0.0000 | No |
| 27188 | Gm37291 | 0.0000 | No |
| 27189 | Gm37292 | 0.0000 | No |
| 27190 | Gm37293 | 0.0000 | No |
| 27191 | Gm37294 | 0.0000 | No |
| 27192 | Gm37295 | 0.0000 | No |
| 27193 | Gm37296 | 0.0000 | No |
| 27194 | Gm37297 | 0.0000 | No |
| 27195 | Gm37298 | 0.0000 | No |
| 27196 | Gm37299 | 0.0000 | No |
| 27197 | Gm37300 | 0.0000 | No |
| 27198 | Gm37302 | 0.0000 | No |
| 27199 | Gm37303 | 0.0000 | No |
| 27200 | Gm37304 | 0.0000 | No |
| 27201 | Gm37305 | 0.0000 | No |
| 27202 | Gm37308 | 0.0000 | No |
| 27203 | Gm37309 | 0.0000 | No |
| 27204 | Gm37311 | 0.0000 | No |
| 27205 | Gm37312 | 0.0000 | No |
| 27206 | Gm37313 | 0.0000 | No |
| 27207 | Gm37314 | 0.0000 | No |
| 27208 | Gm37315 | 0.0000 | No |
| 27209 | Gm37317 | 0.0000 | No |
| 27210 | Gm37318 | 0.0000 | No |
| 27211 | Gm37319 | 0.0000 | No |
| 27212 | Gm37320 | 0.0000 | No |
| 27213 | Gm37321 | 0.0000 | No |
| 27214 | Gm37325 | 0.0000 | No |
| 27215 | Gm37326 | 0.0000 | No |
| 27216 | Gm37327 | 0.0000 | No |
| 27217 | Gm37328 | 0.0000 | No |
| 27218 | Gm37330 | 0.0000 | No |
| 27219 | Gm37331 | 0.0000 | No |
| 27220 | Gm37334 | 0.0000 | No |
| 27221 | Gm37335 | 0.0000 | No |
| 27222 | Gm37336 | 0.0000 | No |
| 27223 | Gm37337 | 0.0000 | No |
| 27224 | Gm37338 | 0.0000 | No |
| 27225 | Gm37339 | 0.0000 | No |
| 27226 | Gm37340 | 0.0000 | No |
| 27227 | Gm37341 | 0.0000 | No |
| 27228 | Gm37342 | 0.0000 | No |
| 27229 | Gm37343 | 0.0000 | No |



|       |         |        |    |
|-------|---------|--------|----|
| 27230 | Gm37344 | 0.0000 | No |
| 27231 | Gm37345 | 0.0000 | No |
| 27232 | Gm37346 | 0.0000 | No |
| 27233 | Gm37347 | 0.0000 | No |
| 27234 | Gm37348 | 0.0000 | No |
| 27235 | Gm37349 | 0.0000 | No |
| 27236 | Gm37350 | 0.0000 | No |
| 27237 | Gm37353 | 0.0000 | No |
| 27238 | Gm37356 | 0.0000 | No |
| 27239 | Gm37357 | 0.0000 | No |
| 27240 | Gm37358 | 0.0000 | No |
| 27241 | Gm37359 | 0.0000 | No |
| 27242 | Gm37361 | 0.0000 | No |
| 27243 | Gm37362 | 0.0000 | No |
| 27244 | Gm37363 | 0.0000 | No |
| 27245 | Gm37365 | 0.0000 | No |
| 27246 | Gm37366 | 0.0000 | No |
| 27247 | Gm37367 | 0.0000 | No |
| 27248 | Gm37368 | 0.0000 | No |
| 27249 | Gm37369 | 0.0000 | No |
| 27250 | Gm37370 | 0.0000 | No |
| 27251 | Gm37371 | 0.0000 | No |
| 27252 | Gm37372 | 0.0000 | No |
| 27253 | Gm37373 | 0.0000 | No |
| 27254 | Gm37374 | 0.0000 | No |
| 27255 | Gm37375 | 0.0000 | No |
| 27256 | Gm37376 | 0.0000 | No |
| 27257 | Gm37377 | 0.0000 | No |
| 27258 | Gm37378 | 0.0000 | No |
| 27259 | Gm37380 | 0.0000 | No |
| 27260 | Gm37381 | 0.0000 | No |
| 27261 | Gm37382 | 0.0000 | No |
| 27262 | Gm37383 | 0.0000 | No |
| 27263 | Gm37385 | 0.0000 | No |
| 27264 | Gm37386 | 0.0000 | No |
| 27265 | Gm37387 | 0.0000 | No |
| 27266 | Gm37388 | 0.0000 | No |
| 27267 | Gm37389 | 0.0000 | No |
| 27268 | Gm3739  | 0.0000 | No |
| 27269 | Gm37390 | 0.0000 | No |
| 27270 | Gm37391 | 0.0000 | No |
| 27271 | Gm37392 | 0.0000 | No |
| 27272 | Gm37393 | 0.0000 | No |
| 27273 | Gm37395 | 0.0000 | No |
| 27274 | Gm37396 | 0.0000 | No |
| 27275 | Gm37397 | 0.0000 | No |

|       |         |        |    |
|-------|---------|--------|----|
| 27276 | Gm37398 | 0.0000 | No |
| 27277 | Gm37399 | 0.0000 | No |
| 27278 | Gm37400 | 0.0000 | No |
| 27279 | Gm37401 | 0.0000 | No |
| 27280 | Gm37402 | 0.0000 | No |
| 27281 | Gm37403 | 0.0000 | No |
| 27282 | Gm37404 | 0.0000 | No |
| 27283 | Gm37406 | 0.0000 | No |
| 27284 | Gm37407 | 0.0000 | No |
| 27285 | Gm37409 | 0.0000 | No |
| 27286 | Gm37410 | 0.0000 | No |
| 27287 | Gm37411 | 0.0000 | No |
| 27288 | Gm37412 | 0.0000 | No |
| 27289 | Gm37414 | 0.0000 | No |
| 27290 | Gm37415 | 0.0000 | No |
| 27291 | Gm37416 | 0.0000 | No |
| 27292 | Gm37417 | 0.0000 | No |
| 27293 | Gm37418 | 0.0000 | No |
| 27294 | Gm37419 | 0.0000 | No |
| 27295 | Gm37420 | 0.0000 | No |
| 27296 | Gm37421 | 0.0000 | No |
| 27297 | Gm37422 | 0.0000 | No |
| 27298 | Gm37424 | 0.0000 | No |
| 27299 | Gm37425 | 0.0000 | No |
| 27300 | Gm37426 | 0.0000 | No |
| 27301 | Gm37429 | 0.0000 | No |
| 27302 | Gm37430 | 0.0000 | No |
| 27303 | Gm37431 | 0.0000 | No |
| 27304 | Gm37432 | 0.0000 | No |
| 27305 | Gm37433 | 0.0000 | No |
| 27306 | Gm37434 | 0.0000 | No |
| 27307 | Gm37435 | 0.0000 | No |
| 27308 | Gm37436 | 0.0000 | No |
| 27309 | Gm37437 | 0.0000 | No |
| 27310 | Gm37439 | 0.0000 | No |
| 27311 | Gm37440 | 0.0000 | No |
| 27312 | Gm37441 | 0.0000 | No |
| 27313 | Gm37442 | 0.0000 | No |
| 27314 | Gm37443 | 0.0000 | No |
| 27315 | Gm37444 | 0.0000 | No |
| 27316 | Gm37445 | 0.0000 | No |
| 27317 | Gm37446 | 0.0000 | No |
| 27318 | Gm37447 | 0.0000 | No |
| 27319 | Gm37448 | 0.0000 | No |
| 27320 | Gm37449 | 0.0000 | No |
| 27321 | Gm3745  | 0.0000 | No |

|       |         |        |    |
|-------|---------|--------|----|
| 27322 | Gm37450 | 0.0000 | No |
| 27323 | Gm37451 | 0.0000 | No |
| 27324 | Gm37454 | 0.0000 | No |
| 27325 | Gm37455 | 0.0000 | No |
| 27326 | Gm37456 | 0.0000 | No |
| 27327 | Gm37457 | 0.0000 | No |
| 27328 | Gm37458 | 0.0000 | No |
| 27329 | Gm37459 | 0.0000 | No |
| 27330 | Gm37460 | 0.0000 | No |
| 27331 | Gm37461 | 0.0000 | No |
| 27332 | Gm37462 | 0.0000 | No |
| 27333 | Gm37463 | 0.0000 | No |
| 27334 | Gm37464 | 0.0000 | No |
| 27335 | Gm37465 | 0.0000 | No |
| 27336 | Gm37466 | 0.0000 | No |
| 27337 | Gm37467 | 0.0000 | No |
| 27338 | Gm37469 | 0.0000 | No |
| 27339 | Gm37470 | 0.0000 | No |
| 27340 | Gm37472 | 0.0000 | No |
| 27341 | Gm37473 | 0.0000 | No |
| 27342 | Gm37474 | 0.0000 | No |
| 27343 | Gm37475 | 0.0000 | No |
| 27344 | Gm37476 | 0.0000 | No |
| 27345 | Gm37477 | 0.0000 | No |
| 27346 | Gm37478 | 0.0000 | No |
| 27347 | Gm37480 | 0.0000 | No |
| 27348 | Gm37482 | 0.0000 | No |
| 27349 | Gm37483 | 0.0000 | No |
| 27350 | Gm37484 | 0.0000 | No |
| 27351 | Gm37485 | 0.0000 | No |
| 27352 | Gm37486 | 0.0000 | No |
| 27353 | Gm37488 | 0.0000 | No |
| 27354 | Gm37490 | 0.0000 | No |
| 27355 | Gm37493 | 0.0000 | No |
| 27356 | Gm37494 | 0.0000 | No |
| 27357 | Gm37495 | 0.0000 | No |
| 27358 | Gm37496 | 0.0000 | No |
| 27359 | Gm37497 | 0.0000 | No |
| 27360 | Gm37498 | 0.0000 | No |
| 27361 | Gm37499 | 0.0000 | No |
| 27362 | Gm3750  | 0.0000 | No |
| 27363 | Gm37500 | 0.0000 | No |
| 27364 | Gm37501 | 0.0000 | No |
| 27365 | Gm37502 | 0.0000 | No |
| 27366 | Gm37503 | 0.0000 | No |
| 27367 | Gm37505 | 0.0000 | No |

|       |         |        |    |
|-------|---------|--------|----|
| 27368 | Gm37506 | 0.0000 | No |
| 27369 | Gm37508 | 0.0000 | No |
| 27370 | Gm37509 | 0.0000 | No |
| 27371 | Gm37510 | 0.0000 | No |
| 27372 | Gm37513 | 0.0000 | No |
| 27373 | Gm37514 | 0.0000 | No |
| 27374 | Gm37515 | 0.0000 | No |
| 27375 | Gm37516 | 0.0000 | No |
| 27376 | Gm37517 | 0.0000 | No |
| 27377 | Gm37518 | 0.0000 | No |
| 27378 | Gm37519 | 0.0000 | No |
| 27379 | Gm3752  | 0.0000 | No |
| 27380 | Gm37520 | 0.0000 | No |
| 27381 | Gm37521 | 0.0000 | No |
| 27382 | Gm37522 | 0.0000 | No |
| 27383 | Gm37523 | 0.0000 | No |
| 27384 | Gm37527 | 0.0000 | No |
| 27385 | Gm37529 | 0.0000 | No |
| 27386 | Gm37530 | 0.0000 | No |
| 27387 | Gm37531 | 0.0000 | No |
| 27388 | Gm37534 | 0.0000 | No |
| 27389 | Gm37535 | 0.0000 | No |
| 27390 | Gm37536 | 0.0000 | No |
| 27391 | Gm37538 | 0.0000 | No |
| 27392 | Gm37539 | 0.0000 | No |
| 27393 | Gm37541 | 0.0000 | No |
| 27394 | Gm37542 | 0.0000 | No |
| 27395 | Gm37544 | 0.0000 | No |
| 27396 | Gm37545 | 0.0000 | No |
| 27397 | Gm37547 | 0.0000 | No |
| 27398 | Gm37548 | 0.0000 | No |
| 27399 | Gm37549 | 0.0000 | No |
| 27400 | Gm3755  | 0.0000 | No |
| 27401 | Gm37550 | 0.0000 | No |
| 27402 | Gm37551 | 0.0000 | No |
| 27403 | Gm37552 | 0.0000 | No |
| 27404 | Gm37553 | 0.0000 | No |
| 27405 | Gm37555 | 0.0000 | No |
| 27406 | Gm37556 | 0.0000 | No |
| 27407 | Gm37557 | 0.0000 | No |
| 27408 | Gm37558 | 0.0000 | No |
| 27409 | Gm37559 | 0.0000 | No |
| 27410 | Gm3756  | 0.0000 | No |
| 27411 | Gm37560 | 0.0000 | No |
| 27412 | Gm37561 | 0.0000 | No |
| 27413 | Gm37562 | 0.0000 | No |

|       |         |        |    |
|-------|---------|--------|----|
| 27414 | Gm37563 | 0.0000 | No |
| 27415 | Gm37564 | 0.0000 | No |
| 27416 | Gm37565 | 0.0000 | No |
| 27417 | Gm37566 | 0.0000 | No |
| 27418 | Gm37567 | 0.0000 | No |
| 27419 | Gm37568 | 0.0000 | No |
| 27420 | Gm37569 | 0.0000 | No |
| 27421 | Gm3757  | 0.0000 | No |
| 27422 | Gm37570 | 0.0000 | No |
| 27423 | Gm37571 | 0.0000 | No |
| 27424 | Gm37572 | 0.0000 | No |
| 27425 | Gm37573 | 0.0000 | No |
| 27426 | Gm37574 | 0.0000 | No |
| 27427 | Gm37576 | 0.0000 | No |
| 27428 | Gm37577 | 0.0000 | No |
| 27429 | Gm37578 | 0.0000 | No |
| 27430 | Gm37579 | 0.0000 | No |
| 27431 | Gm37580 | 0.0000 | No |
| 27432 | Gm37581 | 0.0000 | No |
| 27433 | Gm37582 | 0.0000 | No |
| 27434 | Gm37583 | 0.0000 | No |
| 27435 | Gm37584 | 0.0000 | No |
| 27436 | Gm37585 | 0.0000 | No |
| 27437 | Gm37586 | 0.0000 | No |
| 27438 | Gm37587 | 0.0000 | No |
| 27439 | Gm37588 | 0.0000 | No |
| 27440 | Gm37589 | 0.0000 | No |
| 27441 | Gm37592 | 0.0000 | No |
| 27442 | Gm37593 | 0.0000 | No |
| 27443 | Gm37595 | 0.0000 | No |
| 27444 | Gm37596 | 0.0000 | No |
| 27445 | Gm37597 | 0.0000 | No |
| 27446 | Gm37598 | 0.0000 | No |
| 27447 | Gm37599 | 0.0000 | No |
| 27448 | Gm3760  | 0.0000 | No |
| 27449 | Gm37600 | 0.0000 | No |
| 27450 | Gm37601 | 0.0000 | No |
| 27451 | Gm37602 | 0.0000 | No |
| 27452 | Gm37603 | 0.0000 | No |
| 27453 | Gm37604 | 0.0000 | No |
| 27454 | Gm37606 | 0.0000 | No |
| 27455 | Gm37607 | 0.0000 | No |
| 27456 | Gm37608 | 0.0000 | No |
| 27457 | Gm37609 | 0.0000 | No |
| 27458 | Gm37610 | 0.0000 | No |
| 27459 | Gm37612 | 0.0000 | No |

|       |         |        |    |
|-------|---------|--------|----|
| 27460 | Gm37613 | 0.0000 | No |
| 27461 | Gm37614 | 0.0000 | No |
| 27462 | Gm37616 | 0.0000 | No |
| 27463 | Gm37617 | 0.0000 | No |
| 27464 | Gm37618 | 0.0000 | No |
| 27465 | Gm37619 | 0.0000 | No |
| 27466 | Gm37620 | 0.0000 | No |
| 27467 | Gm37621 | 0.0000 | No |
| 27468 | Gm37622 | 0.0000 | No |
| 27469 | Gm37623 | 0.0000 | No |
| 27470 | Gm37624 | 0.0000 | No |
| 27471 | Gm37625 | 0.0000 | No |
| 27472 | Gm37626 | 0.0000 | No |
| 27473 | Gm37627 | 0.0000 | No |
| 27474 | Gm37628 | 0.0000 | No |
| 27475 | Gm37629 | 0.0000 | No |
| 27476 | Gm3763  | 0.0000 | No |
| 27477 | Gm37630 | 0.0000 | No |
| 27478 | Gm37631 | 0.0000 | No |
| 27479 | Gm37632 | 0.0000 | No |
| 27480 | Gm37633 | 0.0000 | No |
| 27481 | Gm37634 | 0.0000 | No |
| 27482 | Gm37635 | 0.0000 | No |
| 27483 | Gm37637 | 0.0000 | No |
| 27484 | Gm37638 | 0.0000 | No |
| 27485 | Gm37639 | 0.0000 | No |
| 27486 | Gm3764  | 0.0000 | No |
| 27487 | Gm37640 | 0.0000 | No |
| 27488 | Gm37641 | 0.0000 | No |
| 27489 | Gm37642 | 0.0000 | No |
| 27490 | Gm37643 | 0.0000 | No |
| 27491 | Gm37644 | 0.0000 | No |
| 27492 | Gm37645 | 0.0000 | No |
| 27493 | Gm37646 | 0.0000 | No |
| 27494 | Gm37647 | 0.0000 | No |
| 27495 | Gm37648 | 0.0000 | No |
| 27496 | Gm3765  | 0.0000 | No |
| 27497 | Gm37650 | 0.0000 | No |
| 27498 | Gm37651 | 0.0000 | No |
| 27499 | Gm37652 | 0.0000 | No |
| 27500 | Gm37653 | 0.0000 | No |
| 27501 | Gm37654 | 0.0000 | No |
| 27502 | Gm37655 | 0.0000 | No |
| 27503 | Gm37656 | 0.0000 | No |
| 27504 | Gm37657 | 0.0000 | No |
| 27505 | Gm37658 | 0.0000 | No |

|       |         |        |    |
|-------|---------|--------|----|
| 27506 | Gm37659 | 0.0000 | No |
| 27507 | Gm37660 | 0.0000 | No |
| 27508 | Gm37661 | 0.0000 | No |
| 27509 | Gm37662 | 0.0000 | No |
| 27510 | Gm37664 | 0.0000 | No |
| 27511 | Gm37665 | 0.0000 | No |
| 27512 | Gm37666 | 0.0000 | No |
| 27513 | Gm37667 | 0.0000 | No |
| 27514 | Gm37668 | 0.0000 | No |
| 27515 | Gm37671 | 0.0000 | No |
| 27516 | Gm37672 | 0.0000 | No |
| 27517 | Gm37673 | 0.0000 | No |
| 27518 | Gm37674 | 0.0000 | No |
| 27519 | Gm37675 | 0.0000 | No |
| 27520 | Gm37676 | 0.0000 | No |
| 27521 | Gm37677 | 0.0000 | No |
| 27522 | Gm37678 | 0.0000 | No |
| 27523 | Gm37681 | 0.0000 | No |
| 27524 | Gm37682 | 0.0000 | No |
| 27525 | Gm37683 | 0.0000 | No |
| 27526 | Gm37684 | 0.0000 | No |
| 27527 | Gm37685 | 0.0000 | No |
| 27528 | Gm37686 | 0.0000 | No |
| 27529 | Gm37687 | 0.0000 | No |
| 27530 | Gm37688 | 0.0000 | No |
| 27531 | Gm37689 | 0.0000 | No |
| 27532 | Gm37690 | 0.0000 | No |
| 27533 | Gm37691 | 0.0000 | No |
| 27534 | Gm37692 | 0.0000 | No |
| 27535 | Gm37693 | 0.0000 | No |
| 27536 | Gm37694 | 0.0000 | No |
| 27537 | Gm37695 | 0.0000 | No |
| 27538 | Gm37696 | 0.0000 | No |
| 27539 | Gm37697 | 0.0000 | No |
| 27540 | Gm37698 | 0.0000 | No |
| 27541 | Gm37699 | 0.0000 | No |
| 27542 | Gm37701 | 0.0000 | No |
| 27543 | Gm37702 | 0.0000 | No |
| 27544 | Gm37703 | 0.0000 | No |
| 27545 | Gm37705 | 0.0000 | No |
| 27546 | Gm37706 | 0.0000 | No |
| 27547 | Gm37707 | 0.0000 | No |
| 27548 | Gm37708 | 0.0000 | No |
| 27549 | Gm37709 | 0.0000 | No |
| 27550 | Gm37710 | 0.0000 | No |
| 27551 | Gm37711 | 0.0000 | No |

|       |         |        |    |
|-------|---------|--------|----|
| 27552 | Gm37713 | 0.0000 | No |
| 27553 | Gm37714 | 0.0000 | No |
| 27554 | Gm37715 | 0.0000 | No |
| 27555 | Gm37716 | 0.0000 | No |
| 27556 | Gm37717 | 0.0000 | No |
| 27557 | Gm37718 | 0.0000 | No |
| 27558 | Gm37719 | 0.0000 | No |
| 27559 | Gm37721 | 0.0000 | No |
| 27560 | Gm37723 | 0.0000 | No |
| 27561 | Gm37724 | 0.0000 | No |
| 27562 | Gm37726 | 0.0000 | No |
| 27563 | Gm37728 | 0.0000 | No |
| 27564 | Gm37729 | 0.0000 | No |
| 27565 | Gm37730 | 0.0000 | No |
| 27566 | Gm37731 | 0.0000 | No |
| 27567 | Gm37732 | 0.0000 | No |
| 27568 | Gm37733 | 0.0000 | No |
| 27569 | Gm37734 | 0.0000 | No |
| 27570 | Gm37735 | 0.0000 | No |
| 27571 | Gm37738 | 0.0000 | No |
| 27572 | Gm37739 | 0.0000 | No |
| 27573 | Gm3774  | 0.0000 | No |
| 27574 | Gm37740 | 0.0000 | No |
| 27575 | Gm37741 | 0.0000 | No |
| 27576 | Gm37742 | 0.0000 | No |
| 27577 | Gm37743 | 0.0000 | No |
| 27578 | Gm37745 | 0.0000 | No |
| 27579 | Gm37746 | 0.0000 | No |
| 27580 | Gm37747 | 0.0000 | No |
| 27581 | Gm37748 | 0.0000 | No |
| 27582 | Gm37749 | 0.0000 | No |
| 27583 | Gm37751 | 0.0000 | No |
| 27584 | Gm37753 | 0.0000 | No |
| 27585 | Gm37754 | 0.0000 | No |
| 27586 | Gm37755 | 0.0000 | No |
| 27587 | Gm37756 | 0.0000 | No |
| 27588 | Gm37757 | 0.0000 | No |
| 27589 | Gm37758 | 0.0000 | No |
| 27590 | Gm37759 | 0.0000 | No |
| 27591 | Gm3776  | 0.0000 | No |
| 27592 | Gm37760 | 0.0000 | No |
| 27593 | Gm37761 | 0.0000 | No |
| 27594 | Gm37762 | 0.0000 | No |
| 27595 | Gm37763 | 0.0000 | No |
| 27596 | Gm37764 | 0.0000 | No |
| 27597 | Gm37765 | 0.0000 | No |



|       |         |        |    |
|-------|---------|--------|----|
| 27598 | Gm37766 | 0.0000 | No |
| 27599 | Gm37768 | 0.0000 | No |
| 27600 | Gm37769 | 0.0000 | No |
| 27601 | Gm37770 | 0.0000 | No |
| 27602 | Gm37771 | 0.0000 | No |
| 27603 | Gm37772 | 0.0000 | No |
| 27604 | Gm37773 | 0.0000 | No |
| 27605 | Gm37774 | 0.0000 | No |
| 27606 | Gm37775 | 0.0000 | No |
| 27607 | Gm37776 | 0.0000 | No |
| 27608 | Gm37777 | 0.0000 | No |
| 27609 | Gm37778 | 0.0000 | No |
| 27610 | Gm37779 | 0.0000 | No |
| 27611 | Gm37780 | 0.0000 | No |
| 27612 | Gm37781 | 0.0000 | No |
| 27613 | Gm37782 | 0.0000 | No |
| 27614 | Gm37783 | 0.0000 | No |
| 27615 | Gm37784 | 0.0000 | No |
| 27616 | Gm37785 | 0.0000 | No |
| 27617 | Gm37786 | 0.0000 | No |
| 27618 | Gm37787 | 0.0000 | No |
| 27619 | Gm37788 | 0.0000 | No |
| 27620 | Gm37789 | 0.0000 | No |
| 27621 | Gm37790 | 0.0000 | No |
| 27622 | Gm37792 | 0.0000 | No |
| 27623 | Gm37793 | 0.0000 | No |
| 27624 | Gm37795 | 0.0000 | No |
| 27625 | Gm37796 | 0.0000 | No |
| 27626 | Gm37798 | 0.0000 | No |
| 27627 | Gm37799 | 0.0000 | No |
| 27628 | Gm378   | 0.0000 | No |
| 27629 | Gm37800 | 0.0000 | No |
| 27630 | Gm37801 | 0.0000 | No |
| 27631 | Gm37802 | 0.0000 | No |
| 27632 | Gm37804 | 0.0000 | No |
| 27633 | Gm37805 | 0.0000 | No |
| 27634 | Gm37806 | 0.0000 | No |
| 27635 | Gm37807 | 0.0000 | No |
| 27636 | Gm37808 | 0.0000 | No |
| 27637 | Gm37809 | 0.0000 | No |
| 27638 | Gm37812 | 0.0000 | No |
| 27639 | Gm37813 | 0.0000 | No |
| 27640 | Gm37814 | 0.0000 | No |
| 27641 | Gm37815 | 0.0000 | No |
| 27642 | Gm37819 | 0.0000 | No |
| 27643 | Gm37820 | 0.0000 | No |

|       |         |        |    |
|-------|---------|--------|----|
| 27644 | Gm37821 | 0.0000 | No |
| 27645 | Gm37822 | 0.0000 | No |
| 27646 | Gm37823 | 0.0000 | No |
| 27647 | Gm37824 | 0.0000 | No |
| 27648 | Gm37826 | 0.0000 | No |
| 27649 | Gm37828 | 0.0000 | No |
| 27650 | Gm37829 | 0.0000 | No |
| 27651 | Gm37830 | 0.0000 | No |
| 27652 | Gm37831 | 0.0000 | No |
| 27653 | Gm37832 | 0.0000 | No |
| 27654 | Gm37833 | 0.0000 | No |
| 27655 | Gm37834 | 0.0000 | No |
| 27656 | Gm37835 | 0.0000 | No |
| 27657 | Gm37836 | 0.0000 | No |
| 27658 | Gm37838 | 0.0000 | No |
| 27659 | Gm37839 | 0.0000 | No |
| 27660 | Gm37840 | 0.0000 | No |
| 27661 | Gm37841 | 0.0000 | No |
| 27662 | Gm37842 | 0.0000 | No |
| 27663 | Gm37843 | 0.0000 | No |
| 27664 | Gm37844 | 0.0000 | No |
| 27665 | Gm37845 | 0.0000 | No |
| 27666 | Gm37846 | 0.0000 | No |
| 27667 | Gm37847 | 0.0000 | No |
| 27668 | Gm37848 | 0.0000 | No |
| 27669 | Gm37849 | 0.0000 | No |
| 27670 | Gm37850 | 0.0000 | No |
| 27671 | Gm37851 | 0.0000 | No |
| 27672 | Gm37852 | 0.0000 | No |
| 27673 | Gm37854 | 0.0000 | No |
| 27674 | Gm37855 | 0.0000 | No |
| 27675 | Gm37856 | 0.0000 | No |
| 27676 | Gm37858 | 0.0000 | No |
| 27677 | Gm37859 | 0.0000 | No |
| 27678 | Gm3786  | 0.0000 | No |
| 27679 | Gm37860 | 0.0000 | No |
| 27680 | Gm37863 | 0.0000 | No |
| 27681 | Gm37864 | 0.0000 | No |
| 27682 | Gm37865 | 0.0000 | No |
| 27683 | Gm37866 | 0.0000 | No |
| 27684 | Gm37868 | 0.0000 | No |
| 27685 | Gm37869 | 0.0000 | No |
| 27686 | Gm37870 | 0.0000 | No |
| 27687 | Gm37871 | 0.0000 | No |
| 27688 | Gm37872 | 0.0000 | No |
| 27689 | Gm37873 | 0.0000 | No |

|       |         |        |    |
|-------|---------|--------|----|
| 27690 | Gm37874 | 0.0000 | No |
| 27691 | Gm37875 | 0.0000 | No |
| 27692 | Gm37876 | 0.0000 | No |
| 27693 | Gm37877 | 0.0000 | No |
| 27694 | Gm37878 | 0.0000 | No |
| 27695 | Gm37879 | 0.0000 | No |
| 27696 | Gm3788  | 0.0000 | No |
| 27697 | Gm37880 | 0.0000 | No |
| 27698 | Gm37881 | 0.0000 | No |
| 27699 | Gm37882 | 0.0000 | No |
| 27700 | Gm37883 | 0.0000 | No |
| 27701 | Gm37884 | 0.0000 | No |
| 27702 | Gm37885 | 0.0000 | No |
| 27703 | Gm37886 | 0.0000 | No |
| 27704 | Gm37889 | 0.0000 | No |
| 27705 | Gm37892 | 0.0000 | No |
| 27706 | Gm37893 | 0.0000 | No |
| 27707 | Gm37895 | 0.0000 | No |
| 27708 | Gm37896 | 0.0000 | No |
| 27709 | Gm37897 | 0.0000 | No |
| 27710 | Gm37898 | 0.0000 | No |
| 27711 | Gm37899 | 0.0000 | No |
| 27712 | Gm379   | 0.0000 | No |
| 27713 | Gm37900 | 0.0000 | No |
| 27714 | Gm37901 | 0.0000 | No |
| 27715 | Gm37902 | 0.0000 | No |
| 27716 | Gm37903 | 0.0000 | No |
| 27717 | Gm37904 | 0.0000 | No |
| 27718 | Gm37905 | 0.0000 | No |
| 27719 | Gm37906 | 0.0000 | No |
| 27720 | Gm37908 | 0.0000 | No |
| 27721 | Gm37909 | 0.0000 | No |
| 27722 | Gm37910 | 0.0000 | No |
| 27723 | Gm37913 | 0.0000 | No |
| 27724 | Gm37914 | 0.0000 | No |
| 27725 | Gm37915 | 0.0000 | No |
| 27726 | Gm37916 | 0.0000 | No |
| 27727 | Gm37917 | 0.0000 | No |
| 27728 | Gm37918 | 0.0000 | No |
| 27729 | Gm37920 | 0.0000 | No |
| 27730 | Gm37921 | 0.0000 | No |
| 27731 | Gm37922 | 0.0000 | No |
| 27732 | Gm37923 | 0.0000 | No |
| 27733 | Gm37924 | 0.0000 | No |
| 27734 | Gm37925 | 0.0000 | No |
| 27735 | Gm37926 | 0.0000 | No |

|       |         |        |    |
|-------|---------|--------|----|
| 27736 | Gm37927 | 0.0000 | No |
| 27737 | Gm37928 | 0.0000 | No |
| 27738 | Gm37929 | 0.0000 | No |
| 27739 | Gm3793  | 0.0000 | No |
| 27740 | Gm37930 | 0.0000 | No |
| 27741 | Gm37931 | 0.0000 | No |
| 27742 | Gm37932 | 0.0000 | No |
| 27743 | Gm37933 | 0.0000 | No |
| 27744 | Gm37934 | 0.0000 | No |
| 27745 | Gm37935 | 0.0000 | No |
| 27746 | Gm37937 | 0.0000 | No |
| 27747 | Gm37939 | 0.0000 | No |
| 27748 | Gm37940 | 0.0000 | No |
| 27749 | Gm37942 | 0.0000 | No |
| 27750 | Gm37943 | 0.0000 | No |
| 27751 | Gm37944 | 0.0000 | No |
| 27752 | Gm37946 | 0.0000 | No |
| 27753 | Gm37947 | 0.0000 | No |
| 27754 | Gm37948 | 0.0000 | No |
| 27755 | Gm37949 | 0.0000 | No |
| 27756 | Gm37950 | 0.0000 | No |
| 27757 | Gm37951 | 0.0000 | No |
| 27758 | Gm37952 | 0.0000 | No |
| 27759 | Gm37953 | 0.0000 | No |
| 27760 | Gm37954 | 0.0000 | No |
| 27761 | Gm37955 | 0.0000 | No |
| 27762 | Gm37957 | 0.0000 | No |
| 27763 | Gm37958 | 0.0000 | No |
| 27764 | Gm37959 | 0.0000 | No |
| 27765 | Gm37960 | 0.0000 | No |
| 27766 | Gm37961 | 0.0000 | No |
| 27767 | Gm37962 | 0.0000 | No |
| 27768 | Gm37963 | 0.0000 | No |
| 27769 | Gm37964 | 0.0000 | No |
| 27770 | Gm37965 | 0.0000 | No |
| 27771 | Gm37966 | 0.0000 | No |
| 27772 | Gm37967 | 0.0000 | No |
| 27773 | Gm37968 | 0.0000 | No |
| 27774 | Gm37969 | 0.0000 | No |
| 27775 | Gm37970 | 0.0000 | No |
| 27776 | Gm37971 | 0.0000 | No |
| 27777 | Gm37973 | 0.0000 | No |
| 27778 | Gm37974 | 0.0000 | No |
| 27779 | Gm37975 | 0.0000 | No |
| 27780 | Gm37976 | 0.0000 | No |
| 27781 | Gm37977 | 0.0000 | No |

|       |         |        |    |
|-------|---------|--------|----|
| 27782 | Gm37978 | 0.0000 | No |
| 27783 | Gm37979 | 0.0000 | No |
| 27784 | Gm37980 | 0.0000 | No |
| 27785 | Gm37981 | 0.0000 | No |
| 27786 | Gm37982 | 0.0000 | No |
| 27787 | Gm37983 | 0.0000 | No |
| 27788 | Gm37984 | 0.0000 | No |
| 27789 | Gm37985 | 0.0000 | No |
| 27790 | Gm37986 | 0.0000 | No |
| 27791 | Gm37987 | 0.0000 | No |
| 27792 | Gm37988 | 0.0000 | No |
| 27793 | Gm37989 | 0.0000 | No |
| 27794 | Gm37990 | 0.0000 | No |
| 27795 | Gm37991 | 0.0000 | No |
| 27796 | Gm37993 | 0.0000 | No |
| 27797 | Gm37994 | 0.0000 | No |
| 27798 | Gm37995 | 0.0000 | No |
| 27799 | Gm37997 | 0.0000 | No |
| 27800 | Gm37998 | 0.0000 | No |
| 27801 | Gm37999 | 0.0000 | No |
| 27802 | Gm38000 | 0.0000 | No |
| 27803 | Gm38001 | 0.0000 | No |
| 27804 | Gm38002 | 0.0000 | No |
| 27805 | Gm38003 | 0.0000 | No |
| 27806 | Gm38004 | 0.0000 | No |
| 27807 | Gm38005 | 0.0000 | No |
| 27808 | Gm38006 | 0.0000 | No |
| 27809 | Gm38008 | 0.0000 | No |
| 27810 | Gm38009 | 0.0000 | No |
| 27811 | Gm38011 | 0.0000 | No |
| 27812 | Gm38013 | 0.0000 | No |
| 27813 | Gm38014 | 0.0000 | No |
| 27814 | Gm38015 | 0.0000 | No |
| 27815 | Gm38016 | 0.0000 | No |
| 27816 | Gm38017 | 0.0000 | No |
| 27817 | Gm38018 | 0.0000 | No |
| 27818 | Gm38019 | 0.0000 | No |
| 27819 | Gm38020 | 0.0000 | No |
| 27820 | Gm38021 | 0.0000 | No |
| 27821 | Gm38022 | 0.0000 | No |
| 27822 | Gm38025 | 0.0000 | No |
| 27823 | Gm38026 | 0.0000 | No |
| 27824 | Gm38027 | 0.0000 | No |
| 27825 | Gm38028 | 0.0000 | No |
| 27826 | Gm38029 | 0.0000 | No |
| 27827 | Gm38030 | 0.0000 | No |

|       |         |        |    |
|-------|---------|--------|----|
| 27828 | Gm38031 | 0.0000 | No |
| 27829 | Gm38032 | 0.0000 | No |
| 27830 | Gm38033 | 0.0000 | No |
| 27831 | Gm38034 | 0.0000 | No |
| 27832 | Gm38035 | 0.0000 | No |
| 27833 | Gm38036 | 0.0000 | No |
| 27834 | Gm38037 | 0.0000 | No |
| 27835 | Gm38038 | 0.0000 | No |
| 27836 | Gm38039 | 0.0000 | No |
| 27837 | Gm38040 | 0.0000 | No |
| 27838 | Gm38042 | 0.0000 | No |
| 27839 | Gm38044 | 0.0000 | No |
| 27840 | Gm38045 | 0.0000 | No |
| 27841 | Gm38046 | 0.0000 | No |
| 27842 | Gm38047 | 0.0000 | No |
| 27843 | Gm38048 | 0.0000 | No |
| 27844 | Gm38049 | 0.0000 | No |
| 27845 | Gm38050 | 0.0000 | No |
| 27846 | Gm38051 | 0.0000 | No |
| 27847 | Gm38052 | 0.0000 | No |
| 27848 | Gm38053 | 0.0000 | No |
| 27849 | Gm38054 | 0.0000 | No |
| 27850 | Gm38055 | 0.0000 | No |
| 27851 | Gm38056 | 0.0000 | No |
| 27852 | Gm38057 | 0.0000 | No |
| 27853 | Gm38058 | 0.0000 | No |
| 27854 | Gm38059 | 0.0000 | No |
| 27855 | Gm38060 | 0.0000 | No |
| 27856 | Gm38061 | 0.0000 | No |
| 27857 | Gm38062 | 0.0000 | No |
| 27858 | Gm38063 | 0.0000 | No |
| 27859 | Gm38064 | 0.0000 | No |
| 27860 | Gm38067 | 0.0000 | No |
| 27861 | Gm38068 | 0.0000 | No |
| 27862 | Gm38069 | 0.0000 | No |
| 27863 | Gm3807  | 0.0000 | No |
| 27864 | Gm38070 | 0.0000 | No |
| 27865 | Gm38071 | 0.0000 | No |
| 27866 | Gm38072 | 0.0000 | No |
| 27867 | Gm38073 | 0.0000 | No |
| 27868 | Gm38074 | 0.0000 | No |
| 27869 | Gm38075 | 0.0000 | No |
| 27870 | Gm38076 | 0.0000 | No |
| 27871 | Gm38077 | 0.0000 | No |
| 27872 | Gm38078 | 0.0000 | No |
| 27873 | Gm38079 | 0.0000 | No |

|       |         |        |    |
|-------|---------|--------|----|
| 27874 | Gm38080 | 0.0000 | No |
| 27875 | Gm38081 | 0.0000 | No |
| 27876 | Gm38082 | 0.0000 | No |
| 27877 | Gm38084 | 0.0000 | No |
| 27878 | Gm38085 | 0.0000 | No |
| 27879 | Gm38086 | 0.0000 | No |
| 27880 | Gm38087 | 0.0000 | No |
| 27881 | Gm38088 | 0.0000 | No |
| 27882 | Gm38089 | 0.0000 | No |
| 27883 | Gm3809  | 0.0000 | No |
| 27884 | Gm38090 | 0.0000 | No |
| 27885 | Gm38091 | 0.0000 | No |
| 27886 | Gm38092 | 0.0000 | No |
| 27887 | Gm38094 | 0.0000 | No |
| 27888 | Gm38095 | 0.0000 | No |
| 27889 | Gm38096 | 0.0000 | No |
| 27890 | Gm38097 | 0.0000 | No |
| 27891 | Gm38098 | 0.0000 | No |
| 27892 | Gm38099 | 0.0000 | No |
| 27893 | Gm3810  | 0.0000 | No |
| 27894 | Gm38100 | 0.0000 | No |
| 27895 | Gm38101 | 0.0000 | No |
| 27896 | Gm38102 | 0.0000 | No |
| 27897 | Gm38103 | 0.0000 | No |
| 27898 | Gm38104 | 0.0000 | No |
| 27899 | Gm38105 | 0.0000 | No |
| 27900 | Gm38106 | 0.0000 | No |
| 27901 | Gm38107 | 0.0000 | No |
| 27902 | Gm38108 | 0.0000 | No |
| 27903 | Gm38110 | 0.0000 | No |
| 27904 | Gm38115 | 0.0000 | No |
| 27905 | Gm38116 | 0.0000 | No |
| 27906 | Gm38117 | 0.0000 | No |
| 27907 | Gm38118 | 0.0000 | No |
| 27908 | Gm38119 | 0.0000 | No |
| 27909 | Gm38120 | 0.0000 | No |
| 27910 | Gm38121 | 0.0000 | No |
| 27911 | Gm38122 | 0.0000 | No |
| 27912 | Gm38123 | 0.0000 | No |
| 27913 | Gm38124 | 0.0000 | No |
| 27914 | Gm38127 | 0.0000 | No |
| 27915 | Gm38129 | 0.0000 | No |
| 27916 | Gm38130 | 0.0000 | No |
| 27917 | Gm38132 | 0.0000 | No |
| 27918 | Gm38133 | 0.0000 | No |
| 27919 | Gm38134 | 0.0000 | No |

|       |         |        |    |
|-------|---------|--------|----|
| 27920 | Gm38135 | 0.0000 | No |
| 27921 | Gm38136 | 0.0000 | No |
| 27922 | Gm38138 | 0.0000 | No |
| 27923 | Gm38139 | 0.0000 | No |
| 27924 | Gm38140 | 0.0000 | No |
| 27925 | Gm38141 | 0.0000 | No |
| 27926 | Gm38142 | 0.0000 | No |
| 27927 | Gm38144 | 0.0000 | No |
| 27928 | Gm38145 | 0.0000 | No |
| 27929 | Gm38146 | 0.0000 | No |
| 27930 | Gm38147 | 0.0000 | No |
| 27931 | Gm38148 | 0.0000 | No |
| 27932 | Gm38149 | 0.0000 | No |
| 27933 | Gm38150 | 0.0000 | No |
| 27934 | Gm38151 | 0.0000 | No |
| 27935 | Gm38152 | 0.0000 | No |
| 27936 | Gm38153 | 0.0000 | No |
| 27937 | Gm38154 | 0.0000 | No |
| 27938 | Gm38155 | 0.0000 | No |
| 27939 | Gm38156 | 0.0000 | No |
| 27940 | Gm38157 | 0.0000 | No |
| 27941 | Gm38159 | 0.0000 | No |
| 27942 | Gm3816  | 0.0000 | No |
| 27943 | Gm38160 | 0.0000 | No |
| 27944 | Gm38161 | 0.0000 | No |
| 27945 | Gm38162 | 0.0000 | No |
| 27946 | Gm38163 | 0.0000 | No |
| 27947 | Gm38164 | 0.0000 | No |
| 27948 | Gm38165 | 0.0000 | No |
| 27949 | Gm38168 | 0.0000 | No |
| 27950 | Gm38169 | 0.0000 | No |
| 27951 | Gm38170 | 0.0000 | No |
| 27952 | Gm38171 | 0.0000 | No |
| 27953 | Gm38172 | 0.0000 | No |
| 27954 | Gm38173 | 0.0000 | No |
| 27955 | Gm38174 | 0.0000 | No |
| 27956 | Gm38178 | 0.0000 | No |
| 27957 | Gm38180 | 0.0000 | No |
| 27958 | Gm38181 | 0.0000 | No |
| 27959 | Gm38182 | 0.0000 | No |
| 27960 | Gm38183 | 0.0000 | No |
| 27961 | Gm38185 | 0.0000 | No |
| 27962 | Gm38186 | 0.0000 | No |
| 27963 | Gm38187 | 0.0000 | No |
| 27964 | Gm38188 | 0.0000 | No |
| 27965 | Gm38189 | 0.0000 | No |



|       |         |        |    |
|-------|---------|--------|----|
| 27966 | Gm38190 | 0.0000 | No |
| 27967 | Gm38191 | 0.0000 | No |
| 27968 | Gm38192 | 0.0000 | No |
| 27969 | Gm38193 | 0.0000 | No |
| 27970 | Gm38194 | 0.0000 | No |
| 27971 | Gm38195 | 0.0000 | No |
| 27972 | Gm38197 | 0.0000 | No |
| 27973 | Gm38198 | 0.0000 | No |
| 27974 | Gm38199 | 0.0000 | No |
| 27975 | Gm382   | 0.0000 | No |
| 27976 | Gm38200 | 0.0000 | No |
| 27977 | Gm38201 | 0.0000 | No |
| 27978 | Gm38203 | 0.0000 | No |
| 27979 | Gm38204 | 0.0000 | No |
| 27980 | Gm38205 | 0.0000 | No |
| 27981 | Gm38206 | 0.0000 | No |
| 27982 | Gm38207 | 0.0000 | No |
| 27983 | Gm38208 | 0.0000 | No |
| 27984 | Gm38209 | 0.0000 | No |
| 27985 | Gm38210 | 0.0000 | No |
| 27986 | Gm38211 | 0.0000 | No |
| 27987 | Gm38212 | 0.0000 | No |
| 27988 | Gm38213 | 0.0000 | No |
| 27989 | Gm38214 | 0.0000 | No |
| 27990 | Gm38216 | 0.0000 | No |
| 27991 | Gm38217 | 0.0000 | No |
| 27992 | Gm38218 | 0.0000 | No |
| 27993 | Gm3822  | 0.0000 | No |
| 27994 | Gm38220 | 0.0000 | No |
| 27995 | Gm38221 | 0.0000 | No |
| 27996 | Gm38223 | 0.0000 | No |
| 27997 | Gm38224 | 0.0000 | No |
| 27998 | Gm38225 | 0.0000 | No |
| 27999 | Gm38226 | 0.0000 | No |
| 28000 | Gm38227 | 0.0000 | No |
| 28001 | Gm38228 | 0.0000 | No |
| 28002 | Gm38229 | 0.0000 | No |
| 28003 | Gm38230 | 0.0000 | No |
| 28004 | Gm38231 | 0.0000 | No |
| 28005 | Gm38232 | 0.0000 | No |
| 28006 | Gm38233 | 0.0000 | No |
| 28007 | Gm38234 | 0.0000 | No |
| 28008 | Gm38235 | 0.0000 | No |
| 28009 | Gm38236 | 0.0000 | No |
| 28010 | Gm38237 | 0.0000 | No |
| 28011 | Gm38240 | 0.0000 | No |

|       |         |        |    |
|-------|---------|--------|----|
| 28012 | Gm38241 | 0.0000 | No |
| 28013 | Gm38242 | 0.0000 | No |
| 28014 | Gm38243 | 0.0000 | No |
| 28015 | Gm38244 | 0.0000 | No |
| 28016 | Gm38246 | 0.0000 | No |
| 28017 | Gm38247 | 0.0000 | No |
| 28018 | Gm38248 | 0.0000 | No |
| 28019 | Gm38249 | 0.0000 | No |
| 28020 | Gm38250 | 0.0000 | No |
| 28021 | Gm38251 | 0.0000 | No |
| 28022 | Gm38252 | 0.0000 | No |
| 28023 | Gm38253 | 0.0000 | No |
| 28024 | Gm38254 | 0.0000 | No |
| 28025 | Gm38256 | 0.0000 | No |
| 28026 | Gm38257 | 0.0000 | No |
| 28027 | Gm38258 | 0.0000 | No |
| 28028 | Gm38259 | 0.0000 | No |
| 28029 | Gm38260 | 0.0000 | No |
| 28030 | Gm38261 | 0.0000 | No |
| 28031 | Gm38262 | 0.0000 | No |
| 28032 | Gm38263 | 0.0000 | No |
| 28033 | Gm38264 | 0.0000 | No |
| 28034 | Gm38265 | 0.0000 | No |
| 28035 | Gm38266 | 0.0000 | No |
| 28036 | Gm38268 | 0.0000 | No |
| 28037 | Gm38269 | 0.0000 | No |
| 28038 | Gm38270 | 0.0000 | No |
| 28039 | Gm38271 | 0.0000 | No |
| 28040 | Gm38272 | 0.0000 | No |
| 28041 | Gm38273 | 0.0000 | No |
| 28042 | Gm38274 | 0.0000 | No |
| 28043 | Gm38276 | 0.0000 | No |
| 28044 | Gm38278 | 0.0000 | No |
| 28045 | Gm38279 | 0.0000 | No |
| 28046 | Gm38280 | 0.0000 | No |
| 28047 | Gm38281 | 0.0000 | No |
| 28048 | Gm38282 | 0.0000 | No |
| 28049 | Gm38284 | 0.0000 | No |
| 28050 | Gm38286 | 0.0000 | No |
| 28051 | Gm38287 | 0.0000 | No |
| 28052 | Gm38288 | 0.0000 | No |
| 28053 | Gm38289 | 0.0000 | No |
| 28054 | Gm38290 | 0.0000 | No |
| 28055 | Gm38291 | 0.0000 | No |
| 28056 | Gm38293 | 0.0000 | No |
| 28057 | Gm38294 | 0.0000 | No |

|       |         |        |    |
|-------|---------|--------|----|
| 28058 | Gm38295 | 0.0000 | No |
| 28059 | Gm38296 | 0.0000 | No |
| 28060 | Gm38297 | 0.0000 | No |
| 28061 | Gm38298 | 0.0000 | No |
| 28062 | Gm38299 | 0.0000 | No |
| 28063 | Gm3830  | 0.0000 | No |
| 28064 | Gm38300 | 0.0000 | No |
| 28065 | Gm38302 | 0.0000 | No |
| 28066 | Gm38303 | 0.0000 | No |
| 28067 | Gm38304 | 0.0000 | No |
| 28068 | Gm38305 | 0.0000 | No |
| 28069 | Gm38307 | 0.0000 | No |
| 28070 | Gm38308 | 0.0000 | No |
| 28071 | Gm38309 | 0.0000 | No |
| 28072 | Gm38311 | 0.0000 | No |
| 28073 | Gm38312 | 0.0000 | No |
| 28074 | Gm38313 | 0.0000 | No |
| 28075 | Gm38314 | 0.0000 | No |
| 28076 | Gm38315 | 0.0000 | No |
| 28077 | Gm38316 | 0.0000 | No |
| 28078 | Gm38317 | 0.0000 | No |
| 28079 | Gm38318 | 0.0000 | No |
| 28080 | Gm38319 | 0.0000 | No |
| 28081 | Gm38320 | 0.0000 | No |
| 28082 | Gm38322 | 0.0000 | No |
| 28083 | Gm38323 | 0.0000 | No |
| 28084 | Gm38324 | 0.0000 | No |
| 28085 | Gm38325 | 0.0000 | No |
| 28086 | Gm38326 | 0.0000 | No |
| 28087 | Gm38327 | 0.0000 | No |
| 28088 | Gm38329 | 0.0000 | No |
| 28089 | Gm38332 | 0.0000 | No |
| 28090 | Gm38333 | 0.0000 | No |
| 28091 | Gm38334 | 0.0000 | No |
| 28092 | Gm38335 | 0.0000 | No |
| 28093 | Gm38336 | 0.0000 | No |
| 28094 | Gm38339 | 0.0000 | No |
| 28095 | Gm38341 | 0.0000 | No |
| 28096 | Gm38342 | 0.0000 | No |
| 28097 | Gm38343 | 0.0000 | No |
| 28098 | Gm38344 | 0.0000 | No |
| 28099 | Gm38345 | 0.0000 | No |
| 28100 | Gm38346 | 0.0000 | No |
| 28101 | Gm38348 | 0.0000 | No |
| 28102 | Gm38349 | 0.0000 | No |
| 28103 | Gm3835  | 0.0000 | No |

|       |         |        |    |
|-------|---------|--------|----|
| 28104 | Gm38350 | 0.0000 | No |
| 28105 | Gm38351 | 0.0000 | No |
| 28106 | Gm38352 | 0.0000 | No |
| 28107 | Gm38353 | 0.0000 | No |
| 28108 | Gm38355 | 0.0000 | No |
| 28109 | Gm38356 | 0.0000 | No |
| 28110 | Gm38357 | 0.0000 | No |
| 28111 | Gm38358 | 0.0000 | No |
| 28112 | Gm38359 | 0.0000 | No |
| 28113 | Gm3836  | 0.0000 | No |
| 28114 | Gm38360 | 0.0000 | No |
| 28115 | Gm38361 | 0.0000 | No |
| 28116 | Gm38362 | 0.0000 | No |
| 28117 | Gm38363 | 0.0000 | No |
| 28118 | Gm38364 | 0.0000 | No |
| 28119 | Gm38365 | 0.0000 | No |
| 28120 | Gm38366 | 0.0000 | No |
| 28121 | Gm38368 | 0.0000 | No |
| 28122 | Gm38369 | 0.0000 | No |
| 28123 | Gm38370 | 0.0000 | No |
| 28124 | Gm38371 | 0.0000 | No |
| 28125 | Gm38372 | 0.0000 | No |
| 28126 | Gm38373 | 0.0000 | No |
| 28127 | Gm38374 | 0.0000 | No |
| 28128 | Gm38375 | 0.0000 | No |
| 28129 | Gm38376 | 0.0000 | No |
| 28130 | Gm38377 | 0.0000 | No |
| 28131 | Gm38378 | 0.0000 | No |
| 28132 | Gm38380 | 0.0000 | No |
| 28133 | Gm38381 | 0.0000 | No |
| 28134 | Gm38382 | 0.0000 | No |
| 28135 | Gm38383 | 0.0000 | No |
| 28136 | Gm38384 | 0.0000 | No |
| 28137 | Gm38385 | 0.0000 | No |
| 28138 | Gm38386 | 0.0000 | No |
| 28139 | Gm38387 | 0.0000 | No |
| 28140 | Gm38388 | 0.0000 | No |
| 28141 | Gm38389 | 0.0000 | No |
| 28142 | Gm3839  | 0.0000 | No |
| 28143 | Gm38390 | 0.0000 | No |
| 28144 | Gm38391 | 0.0000 | No |
| 28145 | Gm38392 | 0.0000 | No |
| 28146 | Gm38393 | 0.0000 | No |
| 28147 | Gm38394 | 0.0000 | No |
| 28148 | Gm38395 | 0.0000 | No |
| 28149 | Gm38399 | 0.0000 | No |

|       |         |        |    |
|-------|---------|--------|----|
| 28150 | Gm38404 | 0.0000 | No |
| 28151 | Gm38433 | 0.0000 | No |
| 28152 | Gm38451 | 0.0000 | No |
| 28153 | Gm3851  | 0.0000 | No |
| 28154 | Gm3852  | 0.0000 | No |
| 28155 | Gm3854  | 0.0000 | No |
| 28156 | Gm3867  | 0.0000 | No |
| 28157 | Gm38670 | 0.0000 | No |
| 28158 | Gm38671 | 0.0000 | No |
| 28159 | Gm38697 | 0.0000 | No |
| 28160 | Gm38706 | 0.0000 | No |
| 28161 | Gm3880  | 0.0000 | No |
| 28162 | Gm3883  | 0.0000 | No |
| 28163 | Gm3890  | 0.0000 | No |
| 28164 | Gm3892  | 0.0000 | No |
| 28165 | Gm3893  | 0.0000 | No |
| 28166 | Gm38941 | 0.0000 | No |
| 28167 | Gm38947 | 0.0000 | No |
| 28168 | Gm3896  | 0.0000 | No |
| 28169 | Gm3898  | 0.0000 | No |
| 28170 | Gm38999 | 0.0000 | No |
| 28171 | Gm39115 | 0.0000 | No |
| 28172 | Gm3912  | 0.0000 | No |
| 28173 | Gm3922  | 0.0000 | No |
| 28174 | Gm3928  | 0.0000 | No |
| 28175 | Gm39288 | 0.0000 | No |
| 28176 | Gm3931  | 0.0000 | No |
| 28177 | Gm3940  | 0.0000 | No |
| 28178 | Gm3944  | 0.0000 | No |
| 28179 | Gm3945  | 0.0000 | No |
| 28180 | Gm3952  | 0.0000 | No |
| 28181 | Gm3956  | 0.0000 | No |
| 28182 | Gm39566 | 0.0000 | No |
| 28183 | Gm3961  | 0.0000 | No |
| 28184 | Gm3962  | 0.0000 | No |
| 28185 | Gm3970  | 0.0000 | No |
| 28186 | Gm3972  | 0.0000 | No |
| 28187 | Gm3978  | 0.0000 | No |
| 28188 | Gm3985  | 0.0000 | No |
| 28189 | Gm3993  | 0.0000 | No |
| 28190 | Gm40    | 0.0000 | No |
| 28191 | Gm4011  | 0.0000 | No |
| 28192 | Gm4017  | 0.0000 | No |
| 28193 | Gm40190 | 0.0000 | No |
| 28194 | Gm4027  | 0.0000 | No |
| 28195 | Gm40319 | 0.0000 | No |

|       |         |        |    |
|-------|---------|--------|----|
| 28196 | Gm4034  | 0.0000 | No |
| 28197 | Gm4035  | 0.0000 | No |
| 28198 | Gm40414 | 0.0000 | No |
| 28199 | Gm4045  | 0.0000 | No |
| 28200 | Gm4064  | 0.0000 | No |
| 28201 | Gm4070  | 0.0000 | No |
| 28202 | Gm4073  | 0.0000 | No |
| 28203 | Gm4076  | 0.0000 | No |
| 28204 | Gm4081  | 0.0000 | No |
| 28205 | Gm4083  | 0.0000 | No |
| 28206 | Gm41    | 0.0000 | No |
| 28207 | Gm4117  | 0.0000 | No |
| 28208 | Gm412   | 0.0000 | No |
| 28209 | Gm4128  | 0.0000 | No |
| 28210 | Gm4131  | 0.0000 | No |
| 28211 | Gm4133  | 0.0000 | No |
| 28212 | Gm4134  | 0.0000 | No |
| 28213 | Gm4141  | 0.0000 | No |
| 28214 | Gm4149  | 0.0000 | No |
| 28215 | Gm4152  | 0.0000 | No |
| 28216 | Gm4157  | 0.0000 | No |
| 28217 | Gm4175  | 0.0000 | No |
| 28218 | Gm4177  | 0.0000 | No |
| 28219 | Gm4181  | 0.0000 | No |
| 28220 | Gm4187  | 0.0000 | No |
| 28221 | Gm4189  | 0.0000 | No |
| 28222 | Gm4201  | 0.0000 | No |
| 28223 | Gm4202  | 0.0000 | No |
| 28224 | Gm42031 | 0.0000 | No |
| 28225 | Gm4204  | 0.0000 | No |
| 28226 | Gm4207  | 0.0000 | No |
| 28227 | Gm4208  | 0.0000 | No |
| 28228 | Gm4214  | 0.0000 | No |
| 28229 | Gm4216  | 0.0000 | No |
| 28230 | Gm42164 | 0.0000 | No |
| 28231 | Gm4219  | 0.0000 | No |
| 28232 | Gm4221  | 0.0000 | No |
| 28233 | Gm4222  | 0.0000 | No |
| 28234 | Gm4224  | 0.0000 | No |
| 28235 | Gm42372 | 0.0000 | No |
| 28236 | Gm42402 | 0.0000 | No |
| 28237 | Gm42413 | 0.0000 | No |
| 28238 | Gm42416 | 0.0000 | No |
| 28239 | Gm42417 | 0.0000 | No |
| 28240 | Gm42418 | 0.0000 | No |
| 28241 | Gm42419 | 0.0000 | No |

|       |         |        |    |
|-------|---------|--------|----|
| 28242 | Gm42420 | 0.0000 | No |
| 28243 | Gm42421 | 0.0000 | No |
| 28244 | Gm42423 | 0.0000 | No |
| 28245 | Gm42424 | 0.0000 | No |
| 28246 | Gm42425 | 0.0000 | No |
| 28247 | Gm42426 | 0.0000 | No |
| 28248 | Gm42427 | 0.0000 | No |
| 28249 | Gm42429 | 0.0000 | No |
| 28250 | Gm42430 | 0.0000 | No |
| 28251 | Gm42432 | 0.0000 | No |
| 28252 | Gm42433 | 0.0000 | No |
| 28253 | Gm42434 | 0.0000 | No |
| 28254 | Gm42435 | 0.0000 | No |
| 28255 | Gm42436 | 0.0000 | No |
| 28256 | Gm42437 | 0.0000 | No |
| 28257 | Gm42438 | 0.0000 | No |
| 28258 | Gm42439 | 0.0000 | No |
| 28259 | Gm42440 | 0.0000 | No |
| 28260 | Gm42441 | 0.0000 | No |
| 28261 | Gm42442 | 0.0000 | No |
| 28262 | Gm42443 | 0.0000 | No |
| 28263 | Gm42444 | 0.0000 | No |
| 28264 | Gm42446 | 0.0000 | No |
| 28265 | Gm42447 | 0.0000 | No |
| 28266 | Gm42448 | 0.0000 | No |
| 28267 | Gm42449 | 0.0000 | No |
| 28268 | Gm42450 | 0.0000 | No |
| 28269 | Gm42451 | 0.0000 | No |
| 28270 | Gm42452 | 0.0000 | No |
| 28271 | Gm42453 | 0.0000 | No |
| 28272 | Gm42455 | 0.0000 | No |
| 28273 | Gm42456 | 0.0000 | No |
| 28274 | Gm42457 | 0.0000 | No |
| 28275 | Gm42459 | 0.0000 | No |
| 28276 | Gm4246  | 0.0000 | No |
| 28277 | Gm42460 | 0.0000 | No |
| 28278 | Gm42461 | 0.0000 | No |
| 28279 | Gm42462 | 0.0000 | No |
| 28280 | Gm42465 | 0.0000 | No |
| 28281 | Gm42466 | 0.0000 | No |
| 28282 | Gm42467 | 0.0000 | No |
| 28283 | Gm42469 | 0.0000 | No |
| 28284 | Gm42470 | 0.0000 | No |
| 28285 | Gm42472 | 0.0000 | No |
| 28286 | Gm42473 | 0.0000 | No |
| 28287 | Gm42474 | 0.0000 | No |

|       |         |        |    |
|-------|---------|--------|----|
| 28288 | Gm42475 | 0.0000 | No |
| 28289 | Gm42476 | 0.0000 | No |
| 28290 | Gm42477 | 0.0000 | No |
| 28291 | Gm42478 | 0.0000 | No |
| 28292 | Gm42479 | 0.0000 | No |
| 28293 | Gm42480 | 0.0000 | No |
| 28294 | Gm42481 | 0.0000 | No |
| 28295 | Gm42482 | 0.0000 | No |
| 28296 | Gm42483 | 0.0000 | No |
| 28297 | Gm42484 | 0.0000 | No |
| 28298 | Gm42485 | 0.0000 | No |
| 28299 | Gm42486 | 0.0000 | No |
| 28300 | Gm42487 | 0.0000 | No |
| 28301 | Gm42488 | 0.0000 | No |
| 28302 | Gm42489 | 0.0000 | No |
| 28303 | Gm42490 | 0.0000 | No |
| 28304 | Gm42491 | 0.0000 | No |
| 28305 | Gm42492 | 0.0000 | No |
| 28306 | Gm42493 | 0.0000 | No |
| 28307 | Gm42494 | 0.0000 | No |
| 28308 | Gm42496 | 0.0000 | No |
| 28309 | Gm42497 | 0.0000 | No |
| 28310 | Gm42498 | 0.0000 | No |
| 28311 | Gm42499 | 0.0000 | No |
| 28312 | Gm42501 | 0.0000 | No |
| 28313 | Gm42502 | 0.0000 | No |
| 28314 | Gm42503 | 0.0000 | No |
| 28315 | Gm42504 | 0.0000 | No |
| 28316 | Gm42505 | 0.0000 | No |
| 28317 | Gm42506 | 0.0000 | No |
| 28318 | Gm42507 | 0.0000 | No |
| 28319 | Gm42508 | 0.0000 | No |
| 28320 | Gm42509 | 0.0000 | No |
| 28321 | Gm42510 | 0.0000 | No |
| 28322 | Gm42511 | 0.0000 | No |
| 28323 | Gm42512 | 0.0000 | No |
| 28324 | Gm42515 | 0.0000 | No |
| 28325 | Gm42516 | 0.0000 | No |
| 28326 | Gm42517 | 0.0000 | No |
| 28327 | Gm42518 | 0.0000 | No |
| 28328 | Gm4252  | 0.0000 | No |
| 28329 | Gm42520 | 0.0000 | No |
| 28330 | Gm42521 | 0.0000 | No |
| 28331 | Gm42522 | 0.0000 | No |
| 28332 | Gm42523 | 0.0000 | No |
| 28333 | Gm42524 | 0.0000 | No |



|       |         |        |    |
|-------|---------|--------|----|
| 28334 | Gm42525 | 0.0000 | No |
| 28335 | Gm42527 | 0.0000 | No |
| 28336 | Gm42528 | 0.0000 | No |
| 28337 | Gm42529 | 0.0000 | No |
| 28338 | Gm42531 | 0.0000 | No |
| 28339 | Gm42532 | 0.0000 | No |
| 28340 | Gm42533 | 0.0000 | No |
| 28341 | Gm42535 | 0.0000 | No |
| 28342 | Gm42537 | 0.0000 | No |
| 28343 | Gm42538 | 0.0000 | No |
| 28344 | Gm42539 | 0.0000 | No |
| 28345 | Gm42540 | 0.0000 | No |
| 28346 | Gm42541 | 0.0000 | No |
| 28347 | Gm42543 | 0.0000 | No |
| 28348 | Gm42544 | 0.0000 | No |
| 28349 | Gm42546 | 0.0000 | No |
| 28350 | Gm42547 | 0.0000 | No |
| 28351 | Gm42548 | 0.0000 | No |
| 28352 | Gm42549 | 0.0000 | No |
| 28353 | Gm42551 | 0.0000 | No |
| 28354 | Gm42552 | 0.0000 | No |
| 28355 | Gm42553 | 0.0000 | No |
| 28356 | Gm42555 | 0.0000 | No |
| 28357 | Gm42556 | 0.0000 | No |
| 28358 | Gm42557 | 0.0000 | No |
| 28359 | Gm42558 | 0.0000 | No |
| 28360 | Gm42559 | 0.0000 | No |
| 28361 | Gm42560 | 0.0000 | No |
| 28362 | Gm42562 | 0.0000 | No |
| 28363 | Gm42563 | 0.0000 | No |
| 28364 | Gm42564 | 0.0000 | No |
| 28365 | Gm42566 | 0.0000 | No |
| 28366 | Gm42567 | 0.0000 | No |
| 28367 | Gm42568 | 0.0000 | No |
| 28368 | Gm42570 | 0.0000 | No |
| 28369 | Gm42571 | 0.0000 | No |
| 28370 | Gm42572 | 0.0000 | No |
| 28371 | Gm42573 | 0.0000 | No |
| 28372 | Gm42574 | 0.0000 | No |
| 28373 | Gm42575 | 0.0000 | No |
| 28374 | Gm42576 | 0.0000 | No |
| 28375 | Gm42577 | 0.0000 | No |
| 28376 | Gm42578 | 0.0000 | No |
| 28377 | Gm42579 | 0.0000 | No |
| 28378 | Gm4258  | 0.0000 | No |
| 28379 | Gm42580 | 0.0000 | No |

|       |         |        |    |
|-------|---------|--------|----|
| 28380 | Gm42581 | 0.0000 | No |
| 28381 | Gm42583 | 0.0000 | No |
| 28382 | Gm42584 | 0.0000 | No |
| 28383 | Gm42585 | 0.0000 | No |
| 28384 | Gm42586 | 0.0000 | No |
| 28385 | Gm42587 | 0.0000 | No |
| 28386 | Gm42588 | 0.0000 | No |
| 28387 | Gm42589 | 0.0000 | No |
| 28388 | Gm4259  | 0.0000 | No |
| 28389 | Gm42590 | 0.0000 | No |
| 28390 | Gm42591 | 0.0000 | No |
| 28391 | Gm42593 | 0.0000 | No |
| 28392 | Gm42594 | 0.0000 | No |
| 28393 | Gm42595 | 0.0000 | No |
| 28394 | Gm42598 | 0.0000 | No |
| 28395 | Gm42599 | 0.0000 | No |
| 28396 | Gm42600 | 0.0000 | No |
| 28397 | Gm42601 | 0.0000 | No |
| 28398 | Gm42602 | 0.0000 | No |
| 28399 | Gm42603 | 0.0000 | No |
| 28400 | Gm42604 | 0.0000 | No |
| 28401 | Gm42605 | 0.0000 | No |
| 28402 | Gm42606 | 0.0000 | No |
| 28403 | Gm42607 | 0.0000 | No |
| 28404 | Gm42608 | 0.0000 | No |
| 28405 | Gm42610 | 0.0000 | No |
| 28406 | Gm42611 | 0.0000 | No |
| 28407 | Gm42613 | 0.0000 | No |
| 28408 | Gm42616 | 0.0000 | No |
| 28409 | Gm42617 | 0.0000 | No |
| 28410 | Gm42619 | 0.0000 | No |
| 28411 | Gm42620 | 0.0000 | No |
| 28412 | Gm42621 | 0.0000 | No |
| 28413 | Gm42622 | 0.0000 | No |
| 28414 | Gm42623 | 0.0000 | No |
| 28415 | Gm42624 | 0.0000 | No |
| 28416 | Gm42626 | 0.0000 | No |
| 28417 | Gm42627 | 0.0000 | No |
| 28418 | Gm42628 | 0.0000 | No |
| 28419 | Gm42629 | 0.0000 | No |
| 28420 | Gm42631 | 0.0000 | No |
| 28421 | Gm42632 | 0.0000 | No |
| 28422 | Gm42634 | 0.0000 | No |
| 28423 | Gm42635 | 0.0000 | No |
| 28424 | Gm42636 | 0.0000 | No |
| 28425 | Gm42637 | 0.0000 | No |

|       |         |        |    |
|-------|---------|--------|----|
| 28426 | Gm42638 | 0.0000 | No |
| 28427 | Gm42640 | 0.0000 | No |
| 28428 | Gm42641 | 0.0000 | No |
| 28429 | Gm42643 | 0.0000 | No |
| 28430 | Gm42644 | 0.0000 | No |
| 28431 | Gm42645 | 0.0000 | No |
| 28432 | Gm42646 | 0.0000 | No |
| 28433 | Gm42648 | 0.0000 | No |
| 28434 | Gm42649 | 0.0000 | No |
| 28435 | Gm4265  | 0.0000 | No |
| 28436 | Gm42650 | 0.0000 | No |
| 28437 | Gm42651 | 0.0000 | No |
| 28438 | Gm42652 | 0.0000 | No |
| 28439 | Gm42654 | 0.0000 | No |
| 28440 | Gm42655 | 0.0000 | No |
| 28441 | Gm42656 | 0.0000 | No |
| 28442 | Gm42657 | 0.0000 | No |
| 28443 | Gm42658 | 0.0000 | No |
| 28444 | Gm42659 | 0.0000 | No |
| 28445 | Gm42660 | 0.0000 | No |
| 28446 | Gm42661 | 0.0000 | No |
| 28447 | Gm42662 | 0.0000 | No |
| 28448 | Gm42663 | 0.0000 | No |
| 28449 | Gm42664 | 0.0000 | No |
| 28450 | Gm42666 | 0.0000 | No |
| 28451 | Gm42667 | 0.0000 | No |
| 28452 | Gm42668 | 0.0000 | No |
| 28453 | Gm42669 | 0.0000 | No |
| 28454 | Gm42670 | 0.0000 | No |
| 28455 | Gm42671 | 0.0000 | No |
| 28456 | Gm42672 | 0.0000 | No |
| 28457 | Gm42673 | 0.0000 | No |
| 28458 | Gm42674 | 0.0000 | No |
| 28459 | Gm42675 | 0.0000 | No |
| 28460 | Gm42676 | 0.0000 | No |
| 28461 | Gm42677 | 0.0000 | No |
| 28462 | Gm42679 | 0.0000 | No |
| 28463 | Gm42680 | 0.0000 | No |
| 28464 | Gm42681 | 0.0000 | No |
| 28465 | Gm42682 | 0.0000 | No |
| 28466 | Gm42683 | 0.0000 | No |
| 28467 | Gm42684 | 0.0000 | No |
| 28468 | Gm42685 | 0.0000 | No |
| 28469 | Gm42686 | 0.0000 | No |
| 28470 | Gm42687 | 0.0000 | No |
| 28471 | Gm42688 | 0.0000 | No |

|       |         |        |    |
|-------|---------|--------|----|
| 28472 | Gm42689 | 0.0000 | No |
| 28473 | Gm42690 | 0.0000 | No |
| 28474 | Gm42692 | 0.0000 | No |
| 28475 | Gm42693 | 0.0000 | No |
| 28476 | Gm42694 | 0.0000 | No |
| 28477 | Gm42696 | 0.0000 | No |
| 28478 | Gm42697 | 0.0000 | No |
| 28479 | Gm42698 | 0.0000 | No |
| 28480 | Gm42699 | 0.0000 | No |
| 28481 | Gm4270  | 0.0000 | No |
| 28482 | Gm42700 | 0.0000 | No |
| 28483 | Gm42701 | 0.0000 | No |
| 28484 | Gm42702 | 0.0000 | No |
| 28485 | Gm42703 | 0.0000 | No |
| 28486 | Gm42705 | 0.0000 | No |
| 28487 | Gm42707 | 0.0000 | No |
| 28488 | Gm42708 | 0.0000 | No |
| 28489 | Gm42709 | 0.0000 | No |
| 28490 | Gm4271  | 0.0000 | No |
| 28491 | Gm42711 | 0.0000 | No |
| 28492 | Gm42712 | 0.0000 | No |
| 28493 | Gm42713 | 0.0000 | No |
| 28494 | Gm42715 | 0.0000 | No |
| 28495 | Gm42716 | 0.0000 | No |
| 28496 | Gm42717 | 0.0000 | No |
| 28497 | Gm42718 | 0.0000 | No |
| 28498 | Gm42719 | 0.0000 | No |
| 28499 | Gm42720 | 0.0000 | No |
| 28500 | Gm42721 | 0.0000 | No |
| 28501 | Gm42722 | 0.0000 | No |
| 28502 | Gm42723 | 0.0000 | No |
| 28503 | Gm42724 | 0.0000 | No |
| 28504 | Gm42725 | 0.0000 | No |
| 28505 | Gm42726 | 0.0000 | No |
| 28506 | Gm42727 | 0.0000 | No |
| 28507 | Gm42728 | 0.0000 | No |
| 28508 | Gm42729 | 0.0000 | No |
| 28509 | Gm42730 | 0.0000 | No |
| 28510 | Gm42731 | 0.0000 | No |
| 28511 | Gm42732 | 0.0000 | No |
| 28512 | Gm42733 | 0.0000 | No |
| 28513 | Gm42734 | 0.0000 | No |
| 28514 | Gm42735 | 0.0000 | No |
| 28515 | Gm42736 | 0.0000 | No |
| 28516 | Gm42737 | 0.0000 | No |
| 28517 | Gm42738 | 0.0000 | No |

|       |         |        |    |
|-------|---------|--------|----|
| 28518 | Gm42739 | 0.0000 | No |
| 28519 | Gm42740 | 0.0000 | No |
| 28520 | Gm42741 | 0.0000 | No |
| 28521 | Gm42742 | 0.0000 | No |
| 28522 | Gm42743 | 0.0000 | No |
| 28523 | Gm42744 | 0.0000 | No |
| 28524 | Gm42745 | 0.0000 | No |
| 28525 | Gm42748 | 0.0000 | No |
| 28526 | Gm42749 | 0.0000 | No |
| 28527 | Gm4275  | 0.0000 | No |
| 28528 | Gm42750 | 0.0000 | No |
| 28529 | Gm42751 | 0.0000 | No |
| 28530 | Gm42752 | 0.0000 | No |
| 28531 | Gm42755 | 0.0000 | No |
| 28532 | Gm42756 | 0.0000 | No |
| 28533 | Gm42757 | 0.0000 | No |
| 28534 | Gm42758 | 0.0000 | No |
| 28535 | Gm42759 | 0.0000 | No |
| 28536 | Gm42760 | 0.0000 | No |
| 28537 | Gm42762 | 0.0000 | No |
| 28538 | Gm42763 | 0.0000 | No |
| 28539 | Gm42764 | 0.0000 | No |
| 28540 | Gm42765 | 0.0000 | No |
| 28541 | Gm42766 | 0.0000 | No |
| 28542 | Gm42767 | 0.0000 | No |
| 28543 | Gm42769 | 0.0000 | No |
| 28544 | Gm42770 | 0.0000 | No |
| 28545 | Gm42771 | 0.0000 | No |
| 28546 | Gm42772 | 0.0000 | No |
| 28547 | Gm42773 | 0.0000 | No |
| 28548 | Gm42774 | 0.0000 | No |
| 28549 | Gm42775 | 0.0000 | No |
| 28550 | Gm42776 | 0.0000 | No |
| 28551 | Gm42777 | 0.0000 | No |
| 28552 | Gm42778 | 0.0000 | No |
| 28553 | Gm42780 | 0.0000 | No |
| 28554 | Gm42781 | 0.0000 | No |
| 28555 | Gm42782 | 0.0000 | No |
| 28556 | Gm42783 | 0.0000 | No |
| 28557 | Gm42784 | 0.0000 | No |
| 28558 | Gm42785 | 0.0000 | No |
| 28559 | Gm42786 | 0.0000 | No |
| 28560 | Gm42787 | 0.0000 | No |
| 28561 | Gm42788 | 0.0000 | No |
| 28562 | Gm4279  | 0.0000 | No |
| 28563 | Gm42790 | 0.0000 | No |

|       |         |        |    |
|-------|---------|--------|----|
| 28564 | Gm42792 | 0.0000 | No |
| 28565 | Gm42793 | 0.0000 | No |
| 28566 | Gm42795 | 0.0000 | No |
| 28567 | Gm42796 | 0.0000 | No |
| 28568 | Gm42797 | 0.0000 | No |
| 28569 | Gm42798 | 0.0000 | No |
| 28570 | Gm42799 | 0.0000 | No |
| 28571 | Gm428   | 0.0000 | No |
| 28572 | Gm42801 | 0.0000 | No |
| 28573 | Gm42802 | 0.0000 | No |
| 28574 | Gm42803 | 0.0000 | No |
| 28575 | Gm42805 | 0.0000 | No |
| 28576 | Gm42806 | 0.0000 | No |
| 28577 | Gm42807 | 0.0000 | No |
| 28578 | Gm42808 | 0.0000 | No |
| 28579 | Gm42809 | 0.0000 | No |
| 28580 | Gm42810 | 0.0000 | No |
| 28581 | Gm42811 | 0.0000 | No |
| 28582 | Gm42813 | 0.0000 | No |
| 28583 | Gm42814 | 0.0000 | No |
| 28584 | Gm42819 | 0.0000 | No |
| 28585 | Gm42820 | 0.0000 | No |
| 28586 | Gm42821 | 0.0000 | No |
| 28587 | Gm42822 | 0.0000 | No |
| 28588 | Gm42823 | 0.0000 | No |
| 28589 | Gm42824 | 0.0000 | No |
| 28590 | Gm42825 | 0.0000 | No |
| 28591 | Gm42826 | 0.0000 | No |
| 28592 | Gm42827 | 0.0000 | No |
| 28593 | Gm42828 | 0.0000 | No |
| 28594 | Gm42829 | 0.0000 | No |
| 28595 | Gm42830 | 0.0000 | No |
| 28596 | Gm42832 | 0.0000 | No |
| 28597 | Gm42834 | 0.0000 | No |
| 28598 | Gm42836 | 0.0000 | No |
| 28599 | Gm42838 | 0.0000 | No |
| 28600 | Gm42839 | 0.0000 | No |
| 28601 | Gm42840 | 0.0000 | No |
| 28602 | Gm42841 | 0.0000 | No |
| 28603 | Gm42842 | 0.0000 | No |
| 28604 | Gm42843 | 0.0000 | No |
| 28605 | Gm42845 | 0.0000 | No |
| 28606 | Gm42846 | 0.0000 | No |
| 28607 | Gm42847 | 0.0000 | No |
| 28608 | Gm42848 | 0.0000 | No |
| 28609 | Gm42849 | 0.0000 | No |

|       |         |        |    |
|-------|---------|--------|----|
| 28610 | Gm4285  | 0.0000 | No |
| 28611 | Gm42850 | 0.0000 | No |
| 28612 | Gm42851 | 0.0000 | No |
| 28613 | Gm42852 | 0.0000 | No |
| 28614 | Gm42853 | 0.0000 | No |
| 28615 | Gm42854 | 0.0000 | No |
| 28616 | Gm42855 | 0.0000 | No |
| 28617 | Gm42856 | 0.0000 | No |
| 28618 | Gm42857 | 0.0000 | No |
| 28619 | Gm42858 | 0.0000 | No |
| 28620 | Gm42859 | 0.0000 | No |
| 28621 | Gm42860 | 0.0000 | No |
| 28622 | Gm42861 | 0.0000 | No |
| 28623 | Gm42862 | 0.0000 | No |
| 28624 | Gm42863 | 0.0000 | No |
| 28625 | Gm42866 | 0.0000 | No |
| 28626 | Gm42867 | 0.0000 | No |
| 28627 | Gm42869 | 0.0000 | No |
| 28628 | Gm4287  | 0.0000 | No |
| 28629 | Gm42870 | 0.0000 | No |
| 28630 | Gm42871 | 0.0000 | No |
| 28631 | Gm42872 | 0.0000 | No |
| 28632 | Gm42873 | 0.0000 | No |
| 28633 | Gm42874 | 0.0000 | No |
| 28634 | Gm42876 | 0.0000 | No |
| 28635 | Gm42878 | 0.0000 | No |
| 28636 | Gm42879 | 0.0000 | No |
| 28637 | Gm42880 | 0.0000 | No |
| 28638 | Gm42881 | 0.0000 | No |
| 28639 | Gm42882 | 0.0000 | No |
| 28640 | Gm42883 | 0.0000 | No |
| 28641 | Gm42884 | 0.0000 | No |
| 28642 | Gm42885 | 0.0000 | No |
| 28643 | Gm42886 | 0.0000 | No |
| 28644 | Gm42887 | 0.0000 | No |
| 28645 | Gm42888 | 0.0000 | No |
| 28646 | Gm42889 | 0.0000 | No |
| 28647 | Gm42890 | 0.0000 | No |
| 28648 | Gm42892 | 0.0000 | No |
| 28649 | Gm42893 | 0.0000 | No |
| 28650 | Gm42894 | 0.0000 | No |
| 28651 | Gm42895 | 0.0000 | No |
| 28652 | Gm42896 | 0.0000 | No |
| 28653 | Gm42897 | 0.0000 | No |
| 28654 | Gm42898 | 0.0000 | No |
| 28655 | Gm42899 | 0.0000 | No |

|       |         |        |    |
|-------|---------|--------|----|
| 28656 | Gm4290  | 0.0000 | No |
| 28657 | Gm42900 | 0.0000 | No |
| 28658 | Gm42901 | 0.0000 | No |
| 28659 | Gm42903 | 0.0000 | No |
| 28660 | Gm42905 | 0.0000 | No |
| 28661 | Gm42906 | 0.0000 | No |
| 28662 | Gm42907 | 0.0000 | No |
| 28663 | Gm42908 | 0.0000 | No |
| 28664 | Gm42909 | 0.0000 | No |
| 28665 | Gm42910 | 0.0000 | No |
| 28666 | Gm42911 | 0.0000 | No |
| 28667 | Gm42912 | 0.0000 | No |
| 28668 | Gm42913 | 0.0000 | No |
| 28669 | Gm42914 | 0.0000 | No |
| 28670 | Gm42915 | 0.0000 | No |
| 28671 | Gm42916 | 0.0000 | No |
| 28672 | Gm42917 | 0.0000 | No |
| 28673 | Gm42918 | 0.0000 | No |
| 28674 | Gm42919 | 0.0000 | No |
| 28675 | Gm42920 | 0.0000 | No |
| 28676 | Gm42921 | 0.0000 | No |
| 28677 | Gm42922 | 0.0000 | No |
| 28678 | Gm42923 | 0.0000 | No |
| 28679 | Gm42924 | 0.0000 | No |
| 28680 | Gm42926 | 0.0000 | No |
| 28681 | Gm42927 | 0.0000 | No |
| 28682 | Gm42929 | 0.0000 | No |
| 28683 | Gm42930 | 0.0000 | No |
| 28684 | Gm42932 | 0.0000 | No |
| 28685 | Gm42935 | 0.0000 | No |
| 28686 | Gm42936 | 0.0000 | No |
| 28687 | Gm42937 | 0.0000 | No |
| 28688 | Gm42938 | 0.0000 | No |
| 28689 | Gm42939 | 0.0000 | No |
| 28690 | Gm4294  | 0.0000 | No |
| 28691 | Gm42940 | 0.0000 | No |
| 28692 | Gm42941 | 0.0000 | No |
| 28693 | Gm42943 | 0.0000 | No |
| 28694 | Gm42945 | 0.0000 | No |
| 28695 | Gm42946 | 0.0000 | No |
| 28696 | Gm42948 | 0.0000 | No |
| 28697 | Gm42950 | 0.0000 | No |
| 28698 | Gm42952 | 0.0000 | No |
| 28699 | Gm42953 | 0.0000 | No |
| 28700 | Gm42954 | 0.0000 | No |
| 28701 | Gm42955 | 0.0000 | No |



|       |         |        |    |
|-------|---------|--------|----|
| 28702 | Gm42956 | 0.0000 | No |
| 28703 | Gm42957 | 0.0000 | No |
| 28704 | Gm42958 | 0.0000 | No |
| 28705 | Gm42959 | 0.0000 | No |
| 28706 | Gm42960 | 0.0000 | No |
| 28707 | Gm42961 | 0.0000 | No |
| 28708 | Gm42963 | 0.0000 | No |
| 28709 | Gm42964 | 0.0000 | No |
| 28710 | Gm42965 | 0.0000 | No |
| 28711 | Gm42966 | 0.0000 | No |
| 28712 | Gm42967 | 0.0000 | No |
| 28713 | Gm42968 | 0.0000 | No |
| 28714 | Gm42969 | 0.0000 | No |
| 28715 | Gm4297  | 0.0000 | No |
| 28716 | Gm42970 | 0.0000 | No |
| 28717 | Gm42971 | 0.0000 | No |
| 28718 | Gm42972 | 0.0000 | No |
| 28719 | Gm42973 | 0.0000 | No |
| 28720 | Gm42974 | 0.0000 | No |
| 28721 | Gm42976 | 0.0000 | No |
| 28722 | Gm42977 | 0.0000 | No |
| 28723 | Gm42978 | 0.0000 | No |
| 28724 | Gm42979 | 0.0000 | No |
| 28725 | Gm42980 | 0.0000 | No |
| 28726 | Gm42981 | 0.0000 | No |
| 28727 | Gm42982 | 0.0000 | No |
| 28728 | Gm42983 | 0.0000 | No |
| 28729 | Gm42984 | 0.0000 | No |
| 28730 | Gm42985 | 0.0000 | No |
| 28731 | Gm42986 | 0.0000 | No |
| 28732 | Gm42987 | 0.0000 | No |
| 28733 | Gm42988 | 0.0000 | No |
| 28734 | Gm42989 | 0.0000 | No |
| 28735 | Gm42990 | 0.0000 | No |
| 28736 | Gm42991 | 0.0000 | No |
| 28737 | Gm42992 | 0.0000 | No |
| 28738 | Gm42993 | 0.0000 | No |
| 28739 | Gm42994 | 0.0000 | No |
| 28740 | Gm42995 | 0.0000 | No |
| 28741 | Gm42996 | 0.0000 | No |
| 28742 | Gm42997 | 0.0000 | No |
| 28743 | Gm42998 | 0.0000 | No |
| 28744 | Gm43000 | 0.0000 | No |
| 28745 | Gm43002 | 0.0000 | No |
| 28746 | Gm43003 | 0.0000 | No |
| 28747 | Gm43005 | 0.0000 | No |

|       |         |        |    |
|-------|---------|--------|----|
| 28748 | Gm43006 | 0.0000 | No |
| 28749 | Gm43007 | 0.0000 | No |
| 28750 | Gm43008 | 0.0000 | No |
| 28751 | Gm4301  | 0.0000 | No |
| 28752 | Gm43012 | 0.0000 | No |
| 28753 | Gm43013 | 0.0000 | No |
| 28754 | Gm43014 | 0.0000 | No |
| 28755 | Gm43015 | 0.0000 | No |
| 28756 | Gm43016 | 0.0000 | No |
| 28757 | Gm43017 | 0.0000 | No |
| 28758 | Gm43018 | 0.0000 | No |
| 28759 | Gm43019 | 0.0000 | No |
| 28760 | Gm4302  | 0.0000 | No |
| 28761 | Gm43020 | 0.0000 | No |
| 28762 | Gm43023 | 0.0000 | No |
| 28763 | Gm43024 | 0.0000 | No |
| 28764 | Gm43025 | 0.0000 | No |
| 28765 | Gm43026 | 0.0000 | No |
| 28766 | Gm43027 | 0.0000 | No |
| 28767 | Gm43028 | 0.0000 | No |
| 28768 | Gm43029 | 0.0000 | No |
| 28769 | Gm4303  | 0.0000 | No |
| 28770 | Gm43030 | 0.0000 | No |
| 28771 | Gm43031 | 0.0000 | No |
| 28772 | Gm43032 | 0.0000 | No |
| 28773 | Gm43033 | 0.0000 | No |
| 28774 | Gm43034 | 0.0000 | No |
| 28775 | Gm43036 | 0.0000 | No |
| 28776 | Gm43037 | 0.0000 | No |
| 28777 | Gm43038 | 0.0000 | No |
| 28778 | Gm43039 | 0.0000 | No |
| 28779 | Gm43040 | 0.0000 | No |
| 28780 | Gm43041 | 0.0000 | No |
| 28781 | Gm43042 | 0.0000 | No |
| 28782 | Gm43043 | 0.0000 | No |
| 28783 | Gm43044 | 0.0000 | No |
| 28784 | Gm43045 | 0.0000 | No |
| 28785 | Gm43046 | 0.0000 | No |
| 28786 | Gm43047 | 0.0000 | No |
| 28787 | Gm43048 | 0.0000 | No |
| 28788 | Gm43049 | 0.0000 | No |
| 28789 | Gm4305  | 0.0000 | No |
| 28790 | Gm43050 | 0.0000 | No |
| 28791 | Gm43051 | 0.0000 | No |
| 28792 | Gm43052 | 0.0000 | No |
| 28793 | Gm43054 | 0.0000 | No |

|       |         |        |    |
|-------|---------|--------|----|
| 28794 | Gm43055 | 0.0000 | No |
| 28795 | Gm43056 | 0.0000 | No |
| 28796 | Gm43057 | 0.0000 | No |
| 28797 | Gm43059 | 0.0000 | No |
| 28798 | Gm43060 | 0.0000 | No |
| 28799 | Gm43061 | 0.0000 | No |
| 28800 | Gm43062 | 0.0000 | No |
| 28801 | Gm43063 | 0.0000 | No |
| 28802 | Gm43064 | 0.0000 | No |
| 28803 | Gm43065 | 0.0000 | No |
| 28804 | Gm43066 | 0.0000 | No |
| 28805 | Gm43067 | 0.0000 | No |
| 28806 | Gm43068 | 0.0000 | No |
| 28807 | Gm43069 | 0.0000 | No |
| 28808 | Gm4307  | 0.0000 | No |
| 28809 | Gm43071 | 0.0000 | No |
| 28810 | Gm43072 | 0.0000 | No |
| 28811 | Gm43073 | 0.0000 | No |
| 28812 | Gm43075 | 0.0000 | No |
| 28813 | Gm43076 | 0.0000 | No |
| 28814 | Gm43077 | 0.0000 | No |
| 28815 | Gm43078 | 0.0000 | No |
| 28816 | Gm43079 | 0.0000 | No |
| 28817 | Gm4308  | 0.0000 | No |
| 28818 | Gm43080 | 0.0000 | No |
| 28819 | Gm43081 | 0.0000 | No |
| 28820 | Gm43082 | 0.0000 | No |
| 28821 | Gm43084 | 0.0000 | No |
| 28822 | Gm43085 | 0.0000 | No |
| 28823 | Gm43086 | 0.0000 | No |
| 28824 | Gm43087 | 0.0000 | No |
| 28825 | Gm43088 | 0.0000 | No |
| 28826 | Gm43089 | 0.0000 | No |
| 28827 | Gm43090 | 0.0000 | No |
| 28828 | Gm43091 | 0.0000 | No |
| 28829 | Gm43092 | 0.0000 | No |
| 28830 | Gm43093 | 0.0000 | No |
| 28831 | Gm43095 | 0.0000 | No |
| 28832 | Gm43096 | 0.0000 | No |
| 28833 | Gm43097 | 0.0000 | No |
| 28834 | Gm43099 | 0.0000 | No |
| 28835 | Gm43101 | 0.0000 | No |
| 28836 | Gm43102 | 0.0000 | No |
| 28837 | Gm43103 | 0.0000 | No |
| 28838 | Gm43104 | 0.0000 | No |
| 28839 | Gm43105 | 0.0000 | No |

|       |         |        |    |
|-------|---------|--------|----|
| 28840 | Gm43106 | 0.0000 | No |
| 28841 | Gm43107 | 0.0000 | No |
| 28842 | Gm43108 | 0.0000 | No |
| 28843 | Gm43110 | 0.0000 | No |
| 28844 | Gm43114 | 0.0000 | No |
| 28845 | Gm43116 | 0.0000 | No |
| 28846 | Gm43117 | 0.0000 | No |
| 28847 | Gm43118 | 0.0000 | No |
| 28848 | Gm43119 | 0.0000 | No |
| 28849 | Gm4312  | 0.0000 | No |
| 28850 | Gm43120 | 0.0000 | No |
| 28851 | Gm43121 | 0.0000 | No |
| 28852 | Gm43122 | 0.0000 | No |
| 28853 | Gm43123 | 0.0000 | No |
| 28854 | Gm43125 | 0.0000 | No |
| 28855 | Gm43127 | 0.0000 | No |
| 28856 | Gm43128 | 0.0000 | No |
| 28857 | Gm43129 | 0.0000 | No |
| 28858 | Gm43130 | 0.0000 | No |
| 28859 | Gm43131 | 0.0000 | No |
| 28860 | Gm43132 | 0.0000 | No |
| 28861 | Gm43133 | 0.0000 | No |
| 28862 | Gm43134 | 0.0000 | No |
| 28863 | Gm43135 | 0.0000 | No |
| 28864 | Gm43136 | 0.0000 | No |
| 28865 | Gm43137 | 0.0000 | No |
| 28866 | Gm43138 | 0.0000 | No |
| 28867 | Gm43140 | 0.0000 | No |
| 28868 | Gm43141 | 0.0000 | No |
| 28869 | Gm43142 | 0.0000 | No |
| 28870 | Gm43143 | 0.0000 | No |
| 28871 | Gm43144 | 0.0000 | No |
| 28872 | Gm43145 | 0.0000 | No |
| 28873 | Gm43146 | 0.0000 | No |
| 28874 | Gm43148 | 0.0000 | No |
| 28875 | Gm43149 | 0.0000 | No |
| 28876 | Gm43150 | 0.0000 | No |
| 28877 | Gm43151 | 0.0000 | No |
| 28878 | Gm43152 | 0.0000 | No |
| 28879 | Gm43153 | 0.0000 | No |
| 28880 | Gm43154 | 0.0000 | No |
| 28881 | Gm43155 | 0.0000 | No |
| 28882 | Gm43156 | 0.0000 | No |
| 28883 | Gm43157 | 0.0000 | No |
| 28884 | Gm43158 | 0.0000 | No |
| 28885 | Gm43159 | 0.0000 | No |

|       |         |        |    |
|-------|---------|--------|----|
| 28886 | Gm43160 | 0.0000 | No |
| 28887 | Gm43162 | 0.0000 | No |
| 28888 | Gm43163 | 0.0000 | No |
| 28889 | Gm43164 | 0.0000 | No |
| 28890 | Gm43165 | 0.0000 | No |
| 28891 | Gm43166 | 0.0000 | No |
| 28892 | Gm43167 | 0.0000 | No |
| 28893 | Gm43168 | 0.0000 | No |
| 28894 | Gm43170 | 0.0000 | No |
| 28895 | Gm43171 | 0.0000 | No |
| 28896 | Gm43172 | 0.0000 | No |
| 28897 | Gm43173 | 0.0000 | No |
| 28898 | Gm43174 | 0.0000 | No |
| 28899 | Gm43175 | 0.0000 | No |
| 28900 | Gm43176 | 0.0000 | No |
| 28901 | Gm43177 | 0.0000 | No |
| 28902 | Gm43178 | 0.0000 | No |
| 28903 | Gm43179 | 0.0000 | No |
| 28904 | Gm43180 | 0.0000 | No |
| 28905 | Gm43181 | 0.0000 | No |
| 28906 | Gm43182 | 0.0000 | No |
| 28907 | Gm43183 | 0.0000 | No |
| 28908 | Gm43184 | 0.0000 | No |
| 28909 | Gm43185 | 0.0000 | No |
| 28910 | Gm43186 | 0.0000 | No |
| 28911 | Gm43187 | 0.0000 | No |
| 28912 | Gm43188 | 0.0000 | No |
| 28913 | Gm4319  | 0.0000 | No |
| 28914 | Gm43190 | 0.0000 | No |
| 28915 | Gm43191 | 0.0000 | No |
| 28916 | Gm43192 | 0.0000 | No |
| 28917 | Gm43193 | 0.0000 | No |
| 28918 | Gm43194 | 0.0000 | No |
| 28919 | Gm43195 | 0.0000 | No |
| 28920 | Gm43196 | 0.0000 | No |
| 28921 | Gm43197 | 0.0000 | No |
| 28922 | Gm43198 | 0.0000 | No |
| 28923 | Gm43199 | 0.0000 | No |
| 28924 | Gm43200 | 0.0000 | No |
| 28925 | Gm43201 | 0.0000 | No |
| 28926 | Gm43202 | 0.0000 | No |
| 28927 | Gm43203 | 0.0000 | No |
| 28928 | Gm43204 | 0.0000 | No |
| 28929 | Gm43205 | 0.0000 | No |
| 28930 | Gm43207 | 0.0000 | No |
| 28931 | Gm4321  | 0.0000 | No |

|       |         |        |    |
|-------|---------|--------|----|
| 28932 | Gm43211 | 0.0000 | No |
| 28933 | Gm43212 | 0.0000 | No |
| 28934 | Gm43213 | 0.0000 | No |
| 28935 | Gm43214 | 0.0000 | No |
| 28936 | Gm43215 | 0.0000 | No |
| 28937 | Gm43216 | 0.0000 | No |
| 28938 | Gm43217 | 0.0000 | No |
| 28939 | Gm43218 | 0.0000 | No |
| 28940 | Gm43219 | 0.0000 | No |
| 28941 | Gm4322  | 0.0000 | No |
| 28942 | Gm43220 | 0.0000 | No |
| 28943 | Gm43221 | 0.0000 | No |
| 28944 | Gm43222 | 0.0000 | No |
| 28945 | Gm43224 | 0.0000 | No |
| 28946 | Gm43225 | 0.0000 | No |
| 28947 | Gm43226 | 0.0000 | No |
| 28948 | Gm43227 | 0.0000 | No |
| 28949 | Gm43228 | 0.0000 | No |
| 28950 | Gm43229 | 0.0000 | No |
| 28951 | Gm43230 | 0.0000 | No |
| 28952 | Gm43232 | 0.0000 | No |
| 28953 | Gm43234 | 0.0000 | No |
| 28954 | Gm43235 | 0.0000 | No |
| 28955 | Gm43236 | 0.0000 | No |
| 28956 | Gm43237 | 0.0000 | No |
| 28957 | Gm43238 | 0.0000 | No |
| 28958 | Gm43240 | 0.0000 | No |
| 28959 | Gm43242 | 0.0000 | No |
| 28960 | Gm43243 | 0.0000 | No |
| 28961 | Gm43244 | 0.0000 | No |
| 28962 | Gm43245 | 0.0000 | No |
| 28963 | Gm43247 | 0.0000 | No |
| 28964 | Gm43249 | 0.0000 | No |
| 28965 | Gm43250 | 0.0000 | No |
| 28966 | Gm43251 | 0.0000 | No |
| 28967 | Gm43252 | 0.0000 | No |
| 28968 | Gm43255 | 0.0000 | No |
| 28969 | Gm43256 | 0.0000 | No |
| 28970 | Gm43257 | 0.0000 | No |
| 28971 | Gm43258 | 0.0000 | No |
| 28972 | Gm43259 | 0.0000 | No |
| 28973 | Gm43260 | 0.0000 | No |
| 28974 | Gm43262 | 0.0000 | No |
| 28975 | Gm43263 | 0.0000 | No |
| 28976 | Gm43265 | 0.0000 | No |
| 28977 | Gm43266 | 0.0000 | No |

|       |         |        |    |
|-------|---------|--------|----|
| 28978 | Gm43267 | 0.0000 | No |
| 28979 | Gm43268 | 0.0000 | No |
| 28980 | Gm43269 | 0.0000 | No |
| 28981 | Gm43270 | 0.0000 | No |
| 28982 | Gm43271 | 0.0000 | No |
| 28983 | Gm43272 | 0.0000 | No |
| 28984 | Gm43273 | 0.0000 | No |
| 28985 | Gm43274 | 0.0000 | No |
| 28986 | Gm43275 | 0.0000 | No |
| 28987 | Gm43276 | 0.0000 | No |
| 28988 | Gm43278 | 0.0000 | No |
| 28989 | Gm43279 | 0.0000 | No |
| 28990 | Gm43280 | 0.0000 | No |
| 28991 | Gm43282 | 0.0000 | No |
| 28992 | Gm43284 | 0.0000 | No |
| 28993 | Gm43286 | 0.0000 | No |
| 28994 | Gm43287 | 0.0000 | No |
| 28995 | Gm43288 | 0.0000 | No |
| 28996 | Gm43289 | 0.0000 | No |
| 28997 | Gm43290 | 0.0000 | No |
| 28998 | Gm43292 | 0.0000 | No |
| 28999 | Gm43293 | 0.0000 | No |
| 29000 | Gm43294 | 0.0000 | No |
| 29001 | Gm43295 | 0.0000 | No |
| 29002 | Gm43298 | 0.0000 | No |
| 29003 | Gm43300 | 0.0000 | No |
| 29004 | Gm43301 | 0.0000 | No |
| 29005 | Gm43305 | 0.0000 | No |
| 29006 | Gm43306 | 0.0000 | No |
| 29007 | Gm43307 | 0.0000 | No |
| 29008 | Gm43308 | 0.0000 | No |
| 29009 | Gm43309 | 0.0000 | No |
| 29010 | Gm43311 | 0.0000 | No |
| 29011 | Gm43312 | 0.0000 | No |
| 29012 | Gm43313 | 0.0000 | No |
| 29013 | Gm43314 | 0.0000 | No |
| 29014 | Gm43315 | 0.0000 | No |
| 29015 | Gm43316 | 0.0000 | No |
| 29016 | Gm43317 | 0.0000 | No |
| 29017 | Gm43318 | 0.0000 | No |
| 29018 | Gm43319 | 0.0000 | No |
| 29019 | Gm4332  | 0.0000 | No |
| 29020 | Gm43320 | 0.0000 | No |
| 29021 | Gm43321 | 0.0000 | No |
| 29022 | Gm43322 | 0.0000 | No |
| 29023 | Gm43323 | 0.0000 | No |

|       |         |        |    |
|-------|---------|--------|----|
| 29024 | Gm43324 | 0.0000 | No |
| 29025 | Gm43325 | 0.0000 | No |
| 29026 | Gm43327 | 0.0000 | No |
| 29027 | Gm43328 | 0.0000 | No |
| 29028 | Gm43330 | 0.0000 | No |
| 29029 | Gm43331 | 0.0000 | No |
| 29030 | Gm43332 | 0.0000 | No |
| 29031 | Gm43333 | 0.0000 | No |
| 29032 | Gm43335 | 0.0000 | No |
| 29033 | Gm43336 | 0.0000 | No |
| 29034 | Gm43337 | 0.0000 | No |
| 29035 | Gm43338 | 0.0000 | No |
| 29036 | Gm43339 | 0.0000 | No |
| 29037 | Gm43340 | 0.0000 | No |
| 29038 | Gm43341 | 0.0000 | No |
| 29039 | Gm43342 | 0.0000 | No |
| 29040 | Gm43343 | 0.0000 | No |
| 29041 | Gm43344 | 0.0000 | No |
| 29042 | Gm43346 | 0.0000 | No |
| 29043 | Gm43347 | 0.0000 | No |
| 29044 | Gm43348 | 0.0000 | No |
| 29045 | Gm43349 | 0.0000 | No |
| 29046 | Gm4335  | 0.0000 | No |
| 29047 | Gm43350 | 0.0000 | No |
| 29048 | Gm43352 | 0.0000 | No |
| 29049 | Gm43353 | 0.0000 | No |
| 29050 | Gm43354 | 0.0000 | No |
| 29051 | Gm43355 | 0.0000 | No |
| 29052 | Gm43356 | 0.0000 | No |
| 29053 | Gm43357 | 0.0000 | No |
| 29054 | Gm43358 | 0.0000 | No |
| 29055 | Gm43359 | 0.0000 | No |
| 29056 | Gm43360 | 0.0000 | No |
| 29057 | Gm43361 | 0.0000 | No |
| 29058 | Gm43362 | 0.0000 | No |
| 29059 | Gm43363 | 0.0000 | No |
| 29060 | Gm43365 | 0.0000 | No |
| 29061 | Gm43366 | 0.0000 | No |
| 29062 | Gm43367 | 0.0000 | No |
| 29063 | Gm43370 | 0.0000 | No |
| 29064 | Gm43372 | 0.0000 | No |
| 29065 | Gm43373 | 0.0000 | No |
| 29066 | Gm43375 | 0.0000 | No |
| 29067 | Gm43376 | 0.0000 | No |
| 29068 | Gm43377 | 0.0000 | No |
| 29069 | Gm43378 | 0.0000 | No |



|       |         |        |    |
|-------|---------|--------|----|
| 29070 | Gm43379 | 0.0000 | No |
| 29071 | Gm43380 | 0.0000 | No |
| 29072 | Gm43381 | 0.0000 | No |
| 29073 | Gm43382 | 0.0000 | No |
| 29074 | Gm43383 | 0.0000 | No |
| 29075 | Gm43387 | 0.0000 | No |
| 29076 | Gm43388 | 0.0000 | No |
| 29077 | Gm43389 | 0.0000 | No |
| 29078 | Gm43391 | 0.0000 | No |
| 29079 | Gm43392 | 0.0000 | No |
| 29080 | Gm43393 | 0.0000 | No |
| 29081 | Gm43395 | 0.0000 | No |
| 29082 | Gm43396 | 0.0000 | No |
| 29083 | Gm43397 | 0.0000 | No |
| 29084 | Gm4340  | 0.0000 | No |
| 29085 | Gm43400 | 0.0000 | No |
| 29086 | Gm43402 | 0.0000 | No |
| 29087 | Gm43403 | 0.0000 | No |
| 29088 | Gm43404 | 0.0000 | No |
| 29089 | Gm43405 | 0.0000 | No |
| 29090 | Gm43406 | 0.0000 | No |
| 29091 | Gm43407 | 0.0000 | No |
| 29092 | Gm43408 | 0.0000 | No |
| 29093 | Gm43409 | 0.0000 | No |
| 29094 | Gm43410 | 0.0000 | No |
| 29095 | Gm43411 | 0.0000 | No |
| 29096 | Gm43412 | 0.0000 | No |
| 29097 | Gm43413 | 0.0000 | No |
| 29098 | Gm43415 | 0.0000 | No |
| 29099 | Gm43416 | 0.0000 | No |
| 29100 | Gm43417 | 0.0000 | No |
| 29101 | Gm43418 | 0.0000 | No |
| 29102 | Gm43419 | 0.0000 | No |
| 29103 | Gm4342  | 0.0000 | No |
| 29104 | Gm43420 | 0.0000 | No |
| 29105 | Gm43421 | 0.0000 | No |
| 29106 | Gm43422 | 0.0000 | No |
| 29107 | Gm43424 | 0.0000 | No |
| 29108 | Gm43425 | 0.0000 | No |
| 29109 | Gm43426 | 0.0000 | No |
| 29110 | Gm43427 | 0.0000 | No |
| 29111 | Gm43428 | 0.0000 | No |
| 29112 | Gm43429 | 0.0000 | No |
| 29113 | Gm43430 | 0.0000 | No |
| 29114 | Gm43432 | 0.0000 | No |
| 29115 | Gm43433 | 0.0000 | No |

|       |         |        |    |
|-------|---------|--------|----|
| 29116 | Gm43435 | 0.0000 | No |
| 29117 | Gm43436 | 0.0000 | No |
| 29118 | Gm43437 | 0.0000 | No |
| 29119 | Gm43438 | 0.0000 | No |
| 29120 | Gm43439 | 0.0000 | No |
| 29121 | Gm43440 | 0.0000 | No |
| 29122 | Gm43441 | 0.0000 | No |
| 29123 | Gm43442 | 0.0000 | No |
| 29124 | Gm43445 | 0.0000 | No |
| 29125 | Gm43446 | 0.0000 | No |
| 29126 | Gm43447 | 0.0000 | No |
| 29127 | Gm43449 | 0.0000 | No |
| 29128 | Gm43450 | 0.0000 | No |
| 29129 | Gm43453 | 0.0000 | No |
| 29130 | Gm43454 | 0.0000 | No |
| 29131 | Gm43455 | 0.0000 | No |
| 29132 | Gm43456 | 0.0000 | No |
| 29133 | Gm43457 | 0.0000 | No |
| 29134 | Gm43459 | 0.0000 | No |
| 29135 | Gm43460 | 0.0000 | No |
| 29136 | Gm43461 | 0.0000 | No |
| 29137 | Gm43462 | 0.0000 | No |
| 29138 | Gm43463 | 0.0000 | No |
| 29139 | Gm43464 | 0.0000 | No |
| 29140 | Gm43466 | 0.0000 | No |
| 29141 | Gm43467 | 0.0000 | No |
| 29142 | Gm43468 | 0.0000 | No |
| 29143 | Gm43469 | 0.0000 | No |
| 29144 | Gm43470 | 0.0000 | No |
| 29145 | Gm43471 | 0.0000 | No |
| 29146 | Gm43472 | 0.0000 | No |
| 29147 | Gm43473 | 0.0000 | No |
| 29148 | Gm43474 | 0.0000 | No |
| 29149 | Gm43475 | 0.0000 | No |
| 29150 | Gm43476 | 0.0000 | No |
| 29151 | Gm43477 | 0.0000 | No |
| 29152 | Gm43479 | 0.0000 | No |
| 29153 | Gm43480 | 0.0000 | No |
| 29154 | Gm43481 | 0.0000 | No |
| 29155 | Gm43482 | 0.0000 | No |
| 29156 | Gm43483 | 0.0000 | No |
| 29157 | Gm43484 | 0.0000 | No |
| 29158 | Gm43486 | 0.0000 | No |
| 29159 | Gm43487 | 0.0000 | No |
| 29160 | Gm43488 | 0.0000 | No |
| 29161 | Gm43489 | 0.0000 | No |

|       |         |        |    |
|-------|---------|--------|----|
| 29162 | Gm4349  | 0.0000 | No |
| 29163 | Gm43490 | 0.0000 | No |
| 29164 | Gm43492 | 0.0000 | No |
| 29165 | Gm43493 | 0.0000 | No |
| 29166 | Gm43495 | 0.0000 | No |
| 29167 | Gm43496 | 0.0000 | No |
| 29168 | Gm43497 | 0.0000 | No |
| 29169 | Gm43498 | 0.0000 | No |
| 29170 | Gm43499 | 0.0000 | No |
| 29171 | Gm43500 | 0.0000 | No |
| 29172 | Gm43501 | 0.0000 | No |
| 29173 | Gm43502 | 0.0000 | No |
| 29174 | Gm43505 | 0.0000 | No |
| 29175 | Gm43509 | 0.0000 | No |
| 29176 | Gm43510 | 0.0000 | No |
| 29177 | Gm43511 | 0.0000 | No |
| 29178 | Gm43512 | 0.0000 | No |
| 29179 | Gm43513 | 0.0000 | No |
| 29180 | Gm43514 | 0.0000 | No |
| 29181 | Gm43516 | 0.0000 | No |
| 29182 | Gm43518 | 0.0000 | No |
| 29183 | Gm43519 | 0.0000 | No |
| 29184 | Gm43520 | 0.0000 | No |
| 29185 | Gm43521 | 0.0000 | No |
| 29186 | Gm43522 | 0.0000 | No |
| 29187 | Gm43523 | 0.0000 | No |
| 29188 | Gm43524 | 0.0000 | No |
| 29189 | Gm43525 | 0.0000 | No |
| 29190 | Gm43526 | 0.0000 | No |
| 29191 | Gm43527 | 0.0000 | No |
| 29192 | Gm43528 | 0.0000 | No |
| 29193 | Gm43529 | 0.0000 | No |
| 29194 | Gm4353  | 0.0000 | No |
| 29195 | Gm43530 | 0.0000 | No |
| 29196 | Gm43531 | 0.0000 | No |
| 29197 | Gm43532 | 0.0000 | No |
| 29198 | Gm43533 | 0.0000 | No |
| 29199 | Gm43534 | 0.0000 | No |
| 29200 | Gm43535 | 0.0000 | No |
| 29201 | Gm43536 | 0.0000 | No |
| 29202 | Gm43537 | 0.0000 | No |
| 29203 | Gm43538 | 0.0000 | No |
| 29204 | Gm43539 | 0.0000 | No |
| 29205 | Gm43540 | 0.0000 | No |
| 29206 | Gm43542 | 0.0000 | No |
| 29207 | Gm43544 | 0.0000 | No |

|       |         |        |    |
|-------|---------|--------|----|
| 29208 | Gm43545 | 0.0000 | No |
| 29209 | Gm43546 | 0.0000 | No |
| 29210 | Gm43547 | 0.0000 | No |
| 29211 | Gm43548 | 0.0000 | No |
| 29212 | Gm43549 | 0.0000 | No |
| 29213 | Gm43551 | 0.0000 | No |
| 29214 | Gm43552 | 0.0000 | No |
| 29215 | Gm43553 | 0.0000 | No |
| 29216 | Gm43555 | 0.0000 | No |
| 29217 | Gm43556 | 0.0000 | No |
| 29218 | Gm43557 | 0.0000 | No |
| 29219 | Gm43558 | 0.0000 | No |
| 29220 | Gm43559 | 0.0000 | No |
| 29221 | Gm43560 | 0.0000 | No |
| 29222 | Gm43561 | 0.0000 | No |
| 29223 | Gm43562 | 0.0000 | No |
| 29224 | Gm43563 | 0.0000 | No |
| 29225 | Gm43564 | 0.0000 | No |
| 29226 | Gm43565 | 0.0000 | No |
| 29227 | Gm43566 | 0.0000 | No |
| 29228 | Gm43567 | 0.0000 | No |
| 29229 | Gm43568 | 0.0000 | No |
| 29230 | Gm43570 | 0.0000 | No |
| 29231 | Gm43571 | 0.0000 | No |
| 29232 | Gm43573 | 0.0000 | No |
| 29233 | Gm43574 | 0.0000 | No |
| 29234 | Gm43575 | 0.0000 | No |
| 29235 | Gm43576 | 0.0000 | No |
| 29236 | Gm43577 | 0.0000 | No |
| 29237 | Gm43578 | 0.0000 | No |
| 29238 | Gm43579 | 0.0000 | No |
| 29239 | Gm43580 | 0.0000 | No |
| 29240 | Gm43581 | 0.0000 | No |
| 29241 | Gm43582 | 0.0000 | No |
| 29242 | Gm43583 | 0.0000 | No |
| 29243 | Gm43584 | 0.0000 | No |
| 29244 | Gm43585 | 0.0000 | No |
| 29245 | Gm43586 | 0.0000 | No |
| 29246 | Gm43587 | 0.0000 | No |
| 29247 | Gm43588 | 0.0000 | No |
| 29248 | Gm43589 | 0.0000 | No |
| 29249 | Gm43591 | 0.0000 | No |
| 29250 | Gm43592 | 0.0000 | No |
| 29251 | Gm43593 | 0.0000 | No |
| 29252 | Gm43594 | 0.0000 | No |
| 29253 | Gm43596 | 0.0000 | No |

|       |         |        |    |
|-------|---------|--------|----|
| 29254 | Gm43597 | 0.0000 | No |
| 29255 | Gm43598 | 0.0000 | No |
| 29256 | Gm43599 | 0.0000 | No |
| 29257 | Gm436   | 0.0000 | No |
| 29258 | Gm43600 | 0.0000 | No |
| 29259 | Gm43601 | 0.0000 | No |
| 29260 | Gm43602 | 0.0000 | No |
| 29261 | Gm43603 | 0.0000 | No |
| 29262 | Gm43604 | 0.0000 | No |
| 29263 | Gm43605 | 0.0000 | No |
| 29264 | Gm43606 | 0.0000 | No |
| 29265 | Gm43607 | 0.0000 | No |
| 29266 | Gm43609 | 0.0000 | No |
| 29267 | Gm43610 | 0.0000 | No |
| 29268 | Gm43611 | 0.0000 | No |
| 29269 | Gm43613 | 0.0000 | No |
| 29270 | Gm43614 | 0.0000 | No |
| 29271 | Gm43615 | 0.0000 | No |
| 29272 | Gm43617 | 0.0000 | No |
| 29273 | Gm43619 | 0.0000 | No |
| 29274 | Gm43621 | 0.0000 | No |
| 29275 | Gm43623 | 0.0000 | No |
| 29276 | Gm43625 | 0.0000 | No |
| 29277 | Gm43626 | 0.0000 | No |
| 29278 | Gm43627 | 0.0000 | No |
| 29279 | Gm43628 | 0.0000 | No |
| 29280 | Gm43629 | 0.0000 | No |
| 29281 | Gm43631 | 0.0000 | No |
| 29282 | Gm43632 | 0.0000 | No |
| 29283 | Gm43633 | 0.0000 | No |
| 29284 | Gm43634 | 0.0000 | No |
| 29285 | Gm43636 | 0.0000 | No |
| 29286 | Gm43637 | 0.0000 | No |
| 29287 | Gm43638 | 0.0000 | No |
| 29288 | Gm43639 | 0.0000 | No |
| 29289 | Gm43640 | 0.0000 | No |
| 29290 | Gm43641 | 0.0000 | No |
| 29291 | Gm43642 | 0.0000 | No |
| 29292 | Gm43644 | 0.0000 | No |
| 29293 | Gm43645 | 0.0000 | No |
| 29294 | Gm43646 | 0.0000 | No |
| 29295 | Gm43647 | 0.0000 | No |
| 29296 | Gm43649 | 0.0000 | No |
| 29297 | Gm43650 | 0.0000 | No |
| 29298 | Gm43651 | 0.0000 | No |
| 29299 | Gm43653 | 0.0000 | No |

|       |         |        |    |
|-------|---------|--------|----|
| 29300 | Gm43654 | 0.0000 | No |
| 29301 | Gm43655 | 0.0000 | No |
| 29302 | Gm43656 | 0.0000 | No |
| 29303 | Gm43657 | 0.0000 | No |
| 29304 | Gm43659 | 0.0000 | No |
| 29305 | Gm4366  | 0.0000 | No |
| 29306 | Gm43660 | 0.0000 | No |
| 29307 | Gm43661 | 0.0000 | No |
| 29308 | Gm43662 | 0.0000 | No |
| 29309 | Gm43664 | 0.0000 | No |
| 29310 | Gm43665 | 0.0000 | No |
| 29311 | Gm43666 | 0.0000 | No |
| 29312 | Gm43667 | 0.0000 | No |
| 29313 | Gm43668 | 0.0000 | No |
| 29314 | Gm43669 | 0.0000 | No |
| 29315 | Gm43670 | 0.0000 | No |
| 29316 | Gm43671 | 0.0000 | No |
| 29317 | Gm43672 | 0.0000 | No |
| 29318 | Gm43673 | 0.0000 | No |
| 29319 | Gm43674 | 0.0000 | No |
| 29320 | Gm43675 | 0.0000 | No |
| 29321 | Gm43676 | 0.0000 | No |
| 29322 | Gm43677 | 0.0000 | No |
| 29323 | Gm43679 | 0.0000 | No |
| 29324 | Gm43680 | 0.0000 | No |
| 29325 | Gm43681 | 0.0000 | No |
| 29326 | Gm43682 | 0.0000 | No |
| 29327 | Gm43683 | 0.0000 | No |
| 29328 | Gm43685 | 0.0000 | No |
| 29329 | Gm43686 | 0.0000 | No |
| 29330 | Gm43688 | 0.0000 | No |
| 29331 | Gm43689 | 0.0000 | No |
| 29332 | Gm43690 | 0.0000 | No |
| 29333 | Gm43691 | 0.0000 | No |
| 29334 | Gm43692 | 0.0000 | No |
| 29335 | Gm43693 | 0.0000 | No |
| 29336 | Gm43694 | 0.0000 | No |
| 29337 | Gm43695 | 0.0000 | No |
| 29338 | Gm43696 | 0.0000 | No |
| 29339 | Gm43698 | 0.0000 | No |
| 29340 | Gm43699 | 0.0000 | No |
| 29341 | Gm43701 | 0.0000 | No |
| 29342 | Gm43702 | 0.0000 | No |
| 29343 | Gm43703 | 0.0000 | No |
| 29344 | Gm43704 | 0.0000 | No |
| 29345 | Gm43705 | 0.0000 | No |

|       |         |        |    |
|-------|---------|--------|----|
| 29346 | Gm43706 | 0.0000 | No |
| 29347 | Gm43707 | 0.0000 | No |
| 29348 | Gm43708 | 0.0000 | No |
| 29349 | Gm43710 | 0.0000 | No |
| 29350 | Gm43712 | 0.0000 | No |
| 29351 | Gm43713 | 0.0000 | No |
| 29352 | Gm43714 | 0.0000 | No |
| 29353 | Gm43715 | 0.0000 | No |
| 29354 | Gm43716 | 0.0000 | No |
| 29355 | Gm43717 | 0.0000 | No |
| 29356 | Gm43718 | 0.0000 | No |
| 29357 | Gm43719 | 0.0000 | No |
| 29358 | Gm43720 | 0.0000 | No |
| 29359 | Gm43721 | 0.0000 | No |
| 29360 | Gm43722 | 0.0000 | No |
| 29361 | Gm43723 | 0.0000 | No |
| 29362 | Gm43724 | 0.0000 | No |
| 29363 | Gm43725 | 0.0000 | No |
| 29364 | Gm43726 | 0.0000 | No |
| 29365 | Gm43729 | 0.0000 | No |
| 29366 | Gm4373  | 0.0000 | No |
| 29367 | Gm43730 | 0.0000 | No |
| 29368 | Gm43731 | 0.0000 | No |
| 29369 | Gm43733 | 0.0000 | No |
| 29370 | Gm43736 | 0.0000 | No |
| 29371 | Gm43737 | 0.0000 | No |
| 29372 | Gm43739 | 0.0000 | No |
| 29373 | Gm4374  | 0.0000 | No |
| 29374 | Gm43740 | 0.0000 | No |
| 29375 | Gm43741 | 0.0000 | No |
| 29376 | Gm43743 | 0.0000 | No |
| 29377 | Gm43744 | 0.0000 | No |
| 29378 | Gm43745 | 0.0000 | No |
| 29379 | Gm43746 | 0.0000 | No |
| 29380 | Gm43747 | 0.0000 | No |
| 29381 | Gm43748 | 0.0000 | No |
| 29382 | Gm43749 | 0.0000 | No |
| 29383 | Gm43750 | 0.0000 | No |
| 29384 | Gm43752 | 0.0000 | No |
| 29385 | Gm43753 | 0.0000 | No |
| 29386 | Gm43754 | 0.0000 | No |
| 29387 | Gm43755 | 0.0000 | No |
| 29388 | Gm43757 | 0.0000 | No |
| 29389 | Gm43758 | 0.0000 | No |
| 29390 | Gm43759 | 0.0000 | No |
| 29391 | Gm43761 | 0.0000 | No |

|       |         |        |    |
|-------|---------|--------|----|
| 29392 | Gm43763 | 0.0000 | No |
| 29393 | Gm43764 | 0.0000 | No |
| 29394 | Gm43765 | 0.0000 | No |
| 29395 | Gm43766 | 0.0000 | No |
| 29396 | Gm43767 | 0.0000 | No |
| 29397 | Gm43768 | 0.0000 | No |
| 29398 | Gm43769 | 0.0000 | No |
| 29399 | Gm43770 | 0.0000 | No |
| 29400 | Gm43771 | 0.0000 | No |
| 29401 | Gm43772 | 0.0000 | No |
| 29402 | Gm43773 | 0.0000 | No |
| 29403 | Gm43774 | 0.0000 | No |
| 29404 | Gm43775 | 0.0000 | No |
| 29405 | Gm43776 | 0.0000 | No |
| 29406 | Gm43777 | 0.0000 | No |
| 29407 | Gm43778 | 0.0000 | No |
| 29408 | Gm43779 | 0.0000 | No |
| 29409 | Gm43781 | 0.0000 | No |
| 29410 | Gm43782 | 0.0000 | No |
| 29411 | Gm43785 | 0.0000 | No |
| 29412 | Gm43786 | 0.0000 | No |
| 29413 | Gm43787 | 0.0000 | No |
| 29414 | Gm43788 | 0.0000 | No |
| 29415 | Gm43789 | 0.0000 | No |
| 29416 | Gm43790 | 0.0000 | No |
| 29417 | Gm43791 | 0.0000 | No |
| 29418 | Gm43792 | 0.0000 | No |
| 29419 | Gm43793 | 0.0000 | No |
| 29420 | Gm43795 | 0.0000 | No |
| 29421 | Gm43796 | 0.0000 | No |
| 29422 | Gm43798 | 0.0000 | No |
| 29423 | Gm43800 | 0.0000 | No |
| 29424 | Gm43802 | 0.0000 | No |
| 29425 | Gm43803 | 0.0000 | No |
| 29426 | Gm43804 | 0.0000 | No |
| 29427 | Gm43805 | 0.0000 | No |
| 29428 | Gm43806 | 0.0000 | No |
| 29429 | Gm43807 | 0.0000 | No |
| 29430 | Gm43808 | 0.0000 | No |
| 29431 | Gm43809 | 0.0000 | No |
| 29432 | Gm43810 | 0.0000 | No |
| 29433 | Gm43811 | 0.0000 | No |
| 29434 | Gm43813 | 0.0000 | No |
| 29435 | Gm43815 | 0.0000 | No |
| 29436 | Gm43817 | 0.0000 | No |
| 29437 | Gm43818 | 0.0000 | No |



|       |         |        |    |
|-------|---------|--------|----|
| 29438 | Gm43819 | 0.0000 | No |
| 29439 | Gm43821 | 0.0000 | No |
| 29440 | Gm43822 | 0.0000 | No |
| 29441 | Gm43823 | 0.0000 | No |
| 29442 | Gm43824 | 0.0000 | No |
| 29443 | Gm43825 | 0.0000 | No |
| 29444 | Gm43827 | 0.0000 | No |
| 29445 | Gm43828 | 0.0000 | No |
| 29446 | Gm43829 | 0.0000 | No |
| 29447 | Gm43830 | 0.0000 | No |
| 29448 | Gm43831 | 0.0000 | No |
| 29449 | Gm43832 | 0.0000 | No |
| 29450 | Gm43833 | 0.0000 | No |
| 29451 | Gm43834 | 0.0000 | No |
| 29452 | Gm43835 | 0.0000 | No |
| 29453 | Gm43836 | 0.0000 | No |
| 29454 | Gm43837 | 0.0000 | No |
| 29455 | Gm43838 | 0.0000 | No |
| 29456 | Gm43839 | 0.0000 | No |
| 29457 | Gm43841 | 0.0000 | No |
| 29458 | Gm43842 | 0.0000 | No |
| 29459 | Gm43843 | 0.0000 | No |
| 29460 | Gm43844 | 0.0000 | No |
| 29461 | Gm43846 | 0.0000 | No |
| 29462 | Gm43847 | 0.0000 | No |
| 29463 | Gm43848 | 0.0000 | No |
| 29464 | Gm43849 | 0.0000 | No |
| 29465 | Gm43851 | 0.0000 | No |
| 29466 | Gm43852 | 0.0000 | No |
| 29467 | Gm43853 | 0.0000 | No |
| 29468 | Gm43854 | 0.0000 | No |
| 29469 | Gm43855 | 0.0000 | No |
| 29470 | Gm43856 | 0.0000 | No |
| 29471 | Gm43857 | 0.0000 | No |
| 29472 | Gm43858 | 0.0000 | No |
| 29473 | Gm43859 | 0.0000 | No |
| 29474 | Gm43860 | 0.0000 | No |
| 29475 | Gm43861 | 0.0000 | No |
| 29476 | Gm43863 | 0.0000 | No |
| 29477 | Gm43864 | 0.0000 | No |
| 29478 | Gm43865 | 0.0000 | No |
| 29479 | Gm43866 | 0.0000 | No |
| 29480 | Gm43867 | 0.0000 | No |
| 29481 | Gm43868 | 0.0000 | No |
| 29482 | Gm43869 | 0.0000 | No |
| 29483 | Gm43871 | 0.0000 | No |

|       |         |        |    |
|-------|---------|--------|----|
| 29484 | Gm43872 | 0.0000 | No |
| 29485 | Gm43873 | 0.0000 | No |
| 29486 | Gm43876 | 0.0000 | No |
| 29487 | Gm43877 | 0.0000 | No |
| 29488 | Gm43878 | 0.0000 | No |
| 29489 | Gm43879 | 0.0000 | No |
| 29490 | Gm43880 | 0.0000 | No |
| 29491 | Gm43881 | 0.0000 | No |
| 29492 | Gm43882 | 0.0000 | No |
| 29493 | Gm43883 | 0.0000 | No |
| 29494 | Gm43884 | 0.0000 | No |
| 29495 | Gm43885 | 0.0000 | No |
| 29496 | Gm43886 | 0.0000 | No |
| 29497 | Gm43887 | 0.0000 | No |
| 29498 | Gm43889 | 0.0000 | No |
| 29499 | Gm43890 | 0.0000 | No |
| 29500 | Gm43891 | 0.0000 | No |
| 29501 | Gm43893 | 0.0000 | No |
| 29502 | Gm43894 | 0.0000 | No |
| 29503 | Gm43895 | 0.0000 | No |
| 29504 | Gm43897 | 0.0000 | No |
| 29505 | Gm43899 | 0.0000 | No |
| 29506 | Gm43900 | 0.0000 | No |
| 29507 | Gm43901 | 0.0000 | No |
| 29508 | Gm43902 | 0.0000 | No |
| 29509 | Gm43904 | 0.0000 | No |
| 29510 | Gm43905 | 0.0000 | No |
| 29511 | Gm43906 | 0.0000 | No |
| 29512 | Gm43907 | 0.0000 | No |
| 29513 | Gm43908 | 0.0000 | No |
| 29514 | Gm43909 | 0.0000 | No |
| 29515 | Gm43910 | 0.0000 | No |
| 29516 | Gm43912 | 0.0000 | No |
| 29517 | Gm43913 | 0.0000 | No |
| 29518 | Gm43914 | 0.0000 | No |
| 29519 | Gm43915 | 0.0000 | No |
| 29520 | Gm43916 | 0.0000 | No |
| 29521 | Gm43917 | 0.0000 | No |
| 29522 | Gm43918 | 0.0000 | No |
| 29523 | Gm43920 | 0.0000 | No |
| 29524 | Gm43922 | 0.0000 | No |
| 29525 | Gm43924 | 0.0000 | No |
| 29526 | Gm43925 | 0.0000 | No |
| 29527 | Gm43926 | 0.0000 | No |
| 29528 | Gm43927 | 0.0000 | No |
| 29529 | Gm43928 | 0.0000 | No |

|       |         |        |    |
|-------|---------|--------|----|
| 29530 | Gm43929 | 0.0000 | No |
| 29531 | Gm43930 | 0.0000 | No |
| 29532 | Gm43931 | 0.0000 | No |
| 29533 | Gm43932 | 0.0000 | No |
| 29534 | Gm43933 | 0.0000 | No |
| 29535 | Gm43934 | 0.0000 | No |
| 29536 | Gm43935 | 0.0000 | No |
| 29537 | Gm43937 | 0.0000 | No |
| 29538 | Gm43938 | 0.0000 | No |
| 29539 | Gm43940 | 0.0000 | No |
| 29540 | Gm43941 | 0.0000 | No |
| 29541 | Gm43942 | 0.0000 | No |
| 29542 | Gm43943 | 0.0000 | No |
| 29543 | Gm43944 | 0.0000 | No |
| 29544 | Gm43945 | 0.0000 | No |
| 29545 | Gm43946 | 0.0000 | No |
| 29546 | Gm43948 | 0.0000 | No |
| 29547 | Gm43949 | 0.0000 | No |
| 29548 | Gm43950 | 0.0000 | No |
| 29549 | Gm43951 | 0.0000 | No |
| 29550 | Gm43954 | 0.0000 | No |
| 29551 | Gm43956 | 0.0000 | No |
| 29552 | Gm43957 | 0.0000 | No |
| 29553 | Gm43958 | 0.0000 | No |
| 29554 | Gm43959 | 0.0000 | No |
| 29555 | Gm43960 | 0.0000 | No |
| 29556 | Gm43961 | 0.0000 | No |
| 29557 | Gm43963 | 0.0000 | No |
| 29558 | Gm43964 | 0.0000 | No |
| 29559 | Gm43965 | 0.0000 | No |
| 29560 | Gm43966 | 0.0000 | No |
| 29561 | Gm43967 | 0.0000 | No |
| 29562 | Gm43968 | 0.0000 | No |
| 29563 | Gm43969 | 0.0000 | No |
| 29564 | Gm43970 | 0.0000 | No |
| 29565 | Gm43971 | 0.0000 | No |
| 29566 | Gm43972 | 0.0000 | No |
| 29567 | Gm43974 | 0.0000 | No |
| 29568 | Gm43977 | 0.0000 | No |
| 29569 | Gm43978 | 0.0000 | No |
| 29570 | Gm43979 | 0.0000 | No |
| 29571 | Gm4398  | 0.0000 | No |
| 29572 | Gm43980 | 0.0000 | No |
| 29573 | Gm43981 | 0.0000 | No |
| 29574 | Gm43982 | 0.0000 | No |
| 29575 | Gm43983 | 0.0000 | No |

|       |         |        |    |
|-------|---------|--------|----|
| 29576 | Gm43984 | 0.0000 | No |
| 29577 | Gm43985 | 0.0000 | No |
| 29578 | Gm43986 | 0.0000 | No |
| 29579 | Gm43989 | 0.0000 | No |
| 29580 | Gm43990 | 0.0000 | No |
| 29581 | Gm43991 | 0.0000 | No |
| 29582 | Gm43992 | 0.0000 | No |
| 29583 | Gm43993 | 0.0000 | No |
| 29584 | Gm43994 | 0.0000 | No |
| 29585 | Gm43995 | 0.0000 | No |
| 29586 | Gm43996 | 0.0000 | No |
| 29587 | Gm43997 | 0.0000 | No |
| 29588 | Gm43998 | 0.0000 | No |
| 29589 | Gm44    | 0.0000 | No |
| 29590 | Gm44001 | 0.0000 | No |
| 29591 | Gm44002 | 0.0000 | No |
| 29592 | Gm44003 | 0.0000 | No |
| 29593 | Gm44004 | 0.0000 | No |
| 29594 | Gm44005 | 0.0000 | No |
| 29595 | Gm44006 | 0.0000 | No |
| 29596 | Gm44007 | 0.0000 | No |
| 29597 | Gm44009 | 0.0000 | No |
| 29598 | Gm44010 | 0.0000 | No |
| 29599 | Gm44011 | 0.0000 | No |
| 29600 | Gm44012 | 0.0000 | No |
| 29601 | Gm44013 | 0.0000 | No |
| 29602 | Gm44014 | 0.0000 | No |
| 29603 | Gm44015 | 0.0000 | No |
| 29604 | Gm44016 | 0.0000 | No |
| 29605 | Gm44017 | 0.0000 | No |
| 29606 | Gm44019 | 0.0000 | No |
| 29607 | Gm44020 | 0.0000 | No |
| 29608 | Gm44021 | 0.0000 | No |
| 29609 | Gm44022 | 0.0000 | No |
| 29610 | Gm44023 | 0.0000 | No |
| 29611 | Gm44024 | 0.0000 | No |
| 29612 | Gm44025 | 0.0000 | No |
| 29613 | Gm44026 | 0.0000 | No |
| 29614 | Gm44027 | 0.0000 | No |
| 29615 | Gm44028 | 0.0000 | No |
| 29616 | Gm44029 | 0.0000 | No |
| 29617 | Gm44030 | 0.0000 | No |
| 29618 | Gm44031 | 0.0000 | No |
| 29619 | Gm44032 | 0.0000 | No |
| 29620 | Gm44033 | 0.0000 | No |
| 29621 | Gm44034 | 0.0000 | No |

|       |         |        |    |
|-------|---------|--------|----|
| 29622 | Gm44036 | 0.0000 | No |
| 29623 | Gm44037 | 0.0000 | No |
| 29624 | Gm44040 | 0.0000 | No |
| 29625 | Gm44041 | 0.0000 | No |
| 29626 | Gm44042 | 0.0000 | No |
| 29627 | Gm44043 | 0.0000 | No |
| 29628 | Gm44044 | 0.0000 | No |
| 29629 | Gm44045 | 0.0000 | No |
| 29630 | Gm44046 | 0.0000 | No |
| 29631 | Gm44048 | 0.0000 | No |
| 29632 | Gm4405  | 0.0000 | No |
| 29633 | Gm44050 | 0.0000 | No |
| 29634 | Gm44051 | 0.0000 | No |
| 29635 | Gm44052 | 0.0000 | No |
| 29636 | Gm44053 | 0.0000 | No |
| 29637 | Gm44054 | 0.0000 | No |
| 29638 | Gm44055 | 0.0000 | No |
| 29639 | Gm44056 | 0.0000 | No |
| 29640 | Gm44057 | 0.0000 | No |
| 29641 | Gm44058 | 0.0000 | No |
| 29642 | Gm44061 | 0.0000 | No |
| 29643 | Gm44062 | 0.0000 | No |
| 29644 | Gm44063 | 0.0000 | No |
| 29645 | Gm44065 | 0.0000 | No |
| 29646 | Gm44066 | 0.0000 | No |
| 29647 | Gm44067 | 0.0000 | No |
| 29648 | Gm44069 | 0.0000 | No |
| 29649 | Gm44071 | 0.0000 | No |
| 29650 | Gm44072 | 0.0000 | No |
| 29651 | Gm44073 | 0.0000 | No |
| 29652 | Gm44074 | 0.0000 | No |
| 29653 | Gm44075 | 0.0000 | No |
| 29654 | Gm44077 | 0.0000 | No |
| 29655 | Gm44082 | 0.0000 | No |
| 29656 | Gm44083 | 0.0000 | No |
| 29657 | Gm44084 | 0.0000 | No |
| 29658 | Gm44085 | 0.0000 | No |
| 29659 | Gm44086 | 0.0000 | No |
| 29660 | Gm44087 | 0.0000 | No |
| 29661 | Gm44088 | 0.0000 | No |
| 29662 | Gm44089 | 0.0000 | No |
| 29663 | Gm44090 | 0.0000 | No |
| 29664 | Gm44091 | 0.0000 | No |
| 29665 | Gm44092 | 0.0000 | No |
| 29666 | Gm44093 | 0.0000 | No |
| 29667 | Gm44094 | 0.0000 | No |

|       |         |        |    |
|-------|---------|--------|----|
| 29668 | Gm44095 | 0.0000 | No |
| 29669 | Gm44096 | 0.0000 | No |
| 29670 | Gm44097 | 0.0000 | No |
| 29671 | Gm44098 | 0.0000 | No |
| 29672 | Gm44100 | 0.0000 | No |
| 29673 | Gm44101 | 0.0000 | No |
| 29674 | Gm44102 | 0.0000 | No |
| 29675 | Gm44103 | 0.0000 | No |
| 29676 | Gm44104 | 0.0000 | No |
| 29677 | Gm44105 | 0.0000 | No |
| 29678 | Gm44106 | 0.0000 | No |
| 29679 | Gm44107 | 0.0000 | No |
| 29680 | Gm44109 | 0.0000 | No |
| 29681 | Gm44111 | 0.0000 | No |
| 29682 | Gm44112 | 0.0000 | No |
| 29683 | Gm44113 | 0.0000 | No |
| 29684 | Gm44114 | 0.0000 | No |
| 29685 | Gm44115 | 0.0000 | No |
| 29686 | Gm44116 | 0.0000 | No |
| 29687 | Gm44117 | 0.0000 | No |
| 29688 | Gm44118 | 0.0000 | No |
| 29689 | Gm44119 | 0.0000 | No |
| 29690 | Gm4412  | 0.0000 | No |
| 29691 | Gm44120 | 0.0000 | No |
| 29692 | Gm44121 | 0.0000 | No |
| 29693 | Gm44122 | 0.0000 | No |
| 29694 | Gm44123 | 0.0000 | No |
| 29695 | Gm44124 | 0.0000 | No |
| 29696 | Gm44125 | 0.0000 | No |
| 29697 | Gm44126 | 0.0000 | No |
| 29698 | Gm44127 | 0.0000 | No |
| 29699 | Gm44128 | 0.0000 | No |
| 29700 | Gm44129 | 0.0000 | No |
| 29701 | Gm44130 | 0.0000 | No |
| 29702 | Gm44131 | 0.0000 | No |
| 29703 | Gm44132 | 0.0000 | No |
| 29704 | Gm44133 | 0.0000 | No |
| 29705 | Gm44134 | 0.0000 | No |
| 29706 | Gm44136 | 0.0000 | No |
| 29707 | Gm44137 | 0.0000 | No |
| 29708 | Gm44138 | 0.0000 | No |
| 29709 | Gm44139 | 0.0000 | No |
| 29710 | Gm44140 | 0.0000 | No |
| 29711 | Gm44141 | 0.0000 | No |
| 29712 | Gm44142 | 0.0000 | No |
| 29713 | Gm44143 | 0.0000 | No |

|       |         |        |    |
|-------|---------|--------|----|
| 29714 | Gm44144 | 0.0000 | No |
| 29715 | Gm44145 | 0.0000 | No |
| 29716 | Gm44146 | 0.0000 | No |
| 29717 | Gm44147 | 0.0000 | No |
| 29718 | Gm44148 | 0.0000 | No |
| 29719 | Gm44149 | 0.0000 | No |
| 29720 | Gm44150 | 0.0000 | No |
| 29721 | Gm44151 | 0.0000 | No |
| 29722 | Gm44152 | 0.0000 | No |
| 29723 | Gm44153 | 0.0000 | No |
| 29724 | Gm44154 | 0.0000 | No |
| 29725 | Gm44155 | 0.0000 | No |
| 29726 | Gm44156 | 0.0000 | No |
| 29727 | Gm44157 | 0.0000 | No |
| 29728 | Gm44158 | 0.0000 | No |
| 29729 | Gm44159 | 0.0000 | No |
| 29730 | Gm44160 | 0.0000 | No |
| 29731 | Gm44161 | 0.0000 | No |
| 29732 | Gm44162 | 0.0000 | No |
| 29733 | Gm44163 | 0.0000 | No |
| 29734 | Gm44164 | 0.0000 | No |
| 29735 | Gm44165 | 0.0000 | No |
| 29736 | Gm44166 | 0.0000 | No |
| 29737 | Gm44167 | 0.0000 | No |
| 29738 | Gm44169 | 0.0000 | No |
| 29739 | Gm44170 | 0.0000 | No |
| 29740 | Gm44171 | 0.0000 | No |
| 29741 | Gm44173 | 0.0000 | No |
| 29742 | Gm44175 | 0.0000 | No |
| 29743 | Gm44176 | 0.0000 | No |
| 29744 | Gm44178 | 0.0000 | No |
| 29745 | Gm44179 | 0.0000 | No |
| 29746 | Gm44180 | 0.0000 | No |
| 29747 | Gm44181 | 0.0000 | No |
| 29748 | Gm44182 | 0.0000 | No |
| 29749 | Gm44184 | 0.0000 | No |
| 29750 | Gm44185 | 0.0000 | No |
| 29751 | Gm44186 | 0.0000 | No |
| 29752 | Gm44187 | 0.0000 | No |
| 29753 | Gm44188 | 0.0000 | No |
| 29754 | Gm44189 | 0.0000 | No |
| 29755 | Gm4419  | 0.0000 | No |
| 29756 | Gm44190 | 0.0000 | No |
| 29757 | Gm44192 | 0.0000 | No |
| 29758 | Gm44193 | 0.0000 | No |
| 29759 | Gm44196 | 0.0000 | No |

|       |         |        |    |
|-------|---------|--------|----|
| 29760 | Gm44198 | 0.0000 | No |
| 29761 | Gm44199 | 0.0000 | No |
| 29762 | Gm44200 | 0.0000 | No |
| 29763 | Gm44201 | 0.0000 | No |
| 29764 | Gm44202 | 0.0000 | No |
| 29765 | Gm44203 | 0.0000 | No |
| 29766 | Gm44204 | 0.0000 | No |
| 29767 | Gm44205 | 0.0000 | No |
| 29768 | Gm44207 | 0.0000 | No |
| 29769 | Gm44209 | 0.0000 | No |
| 29770 | Gm44210 | 0.0000 | No |
| 29771 | Gm44211 | 0.0000 | No |
| 29772 | Gm44212 | 0.0000 | No |
| 29773 | Gm44214 | 0.0000 | No |
| 29774 | Gm44215 | 0.0000 | No |
| 29775 | Gm44216 | 0.0000 | No |
| 29776 | Gm44217 | 0.0000 | No |
| 29777 | Gm44218 | 0.0000 | No |
| 29778 | Gm44219 | 0.0000 | No |
| 29779 | Gm44220 | 0.0000 | No |
| 29780 | Gm44221 | 0.0000 | No |
| 29781 | Gm44223 | 0.0000 | No |
| 29782 | Gm44224 | 0.0000 | No |
| 29783 | Gm44225 | 0.0000 | No |
| 29784 | Gm44226 | 0.0000 | No |
| 29785 | Gm44227 | 0.0000 | No |
| 29786 | Gm44229 | 0.0000 | No |
| 29787 | Gm44230 | 0.0000 | No |
| 29788 | Gm44231 | 0.0000 | No |
| 29789 | Gm44232 | 0.0000 | No |
| 29790 | Gm44233 | 0.0000 | No |
| 29791 | Gm44234 | 0.0000 | No |
| 29792 | Gm44235 | 0.0000 | No |
| 29793 | Gm44236 | 0.0000 | No |
| 29794 | Gm44237 | 0.0000 | No |
| 29795 | Gm44238 | 0.0000 | No |
| 29796 | Gm44239 | 0.0000 | No |
| 29797 | Gm44240 | 0.0000 | No |
| 29798 | Gm44242 | 0.0000 | No |
| 29799 | Gm44243 | 0.0000 | No |
| 29800 | Gm44245 | 0.0000 | No |
| 29801 | Gm44246 | 0.0000 | No |
| 29802 | Gm44247 | 0.0000 | No |
| 29803 | Gm44248 | 0.0000 | No |
| 29804 | Gm44249 | 0.0000 | No |
| 29805 | Gm4425  | 0.0000 | No |



|       |         |        |    |
|-------|---------|--------|----|
| 29806 | Gm44250 | 0.0000 | No |
| 29807 | Gm44252 | 0.0000 | No |
| 29808 | Gm44253 | 0.0000 | No |
| 29809 | Gm44255 | 0.0000 | No |
| 29810 | Gm44256 | 0.0000 | No |
| 29811 | Gm44257 | 0.0000 | No |
| 29812 | Gm44258 | 0.0000 | No |
| 29813 | Gm44259 | 0.0000 | No |
| 29814 | Gm44260 | 0.0000 | No |
| 29815 | Gm44261 | 0.0000 | No |
| 29816 | Gm44262 | 0.0000 | No |
| 29817 | Gm44264 | 0.0000 | No |
| 29818 | Gm44265 | 0.0000 | No |
| 29819 | Gm44267 | 0.0000 | No |
| 29820 | Gm44268 | 0.0000 | No |
| 29821 | Gm44269 | 0.0000 | No |
| 29822 | Gm44270 | 0.0000 | No |
| 29823 | Gm44271 | 0.0000 | No |
| 29824 | Gm44272 | 0.0000 | No |
| 29825 | Gm44274 | 0.0000 | No |
| 29826 | Gm44275 | 0.0000 | No |
| 29827 | Gm44276 | 0.0000 | No |
| 29828 | Gm44277 | 0.0000 | No |
| 29829 | Gm44278 | 0.0000 | No |
| 29830 | Gm44279 | 0.0000 | No |
| 29831 | Gm44280 | 0.0000 | No |
| 29832 | Gm44281 | 0.0000 | No |
| 29833 | Gm44282 | 0.0000 | No |
| 29834 | Gm44283 | 0.0000 | No |
| 29835 | Gm44284 | 0.0000 | No |
| 29836 | Gm44285 | 0.0000 | No |
| 29837 | Gm44286 | 0.0000 | No |
| 29838 | Gm44287 | 0.0000 | No |
| 29839 | Gm44289 | 0.0000 | No |
| 29840 | Gm44290 | 0.0000 | No |
| 29841 | Gm44291 | 0.0000 | No |
| 29842 | Gm44292 | 0.0000 | No |
| 29843 | Gm44294 | 0.0000 | No |
| 29844 | Gm44295 | 0.0000 | No |
| 29845 | Gm44296 | 0.0000 | No |
| 29846 | Gm44297 | 0.0000 | No |
| 29847 | Gm44298 | 0.0000 | No |
| 29848 | Gm44299 | 0.0000 | No |
| 29849 | Gm4430  | 0.0000 | No |
| 29850 | Gm44300 | 0.0000 | No |
| 29851 | Gm44301 | 0.0000 | No |

|       |         |        |    |
|-------|---------|--------|----|
| 29852 | Gm44302 | 0.0000 | No |
| 29853 | Gm44303 | 0.0000 | No |
| 29854 | Gm44304 | 0.0000 | No |
| 29855 | Gm44305 | 0.0000 | No |
| 29856 | Gm44306 | 0.0000 | No |
| 29857 | Gm44307 | 0.0000 | No |
| 29858 | Gm44308 | 0.0000 | No |
| 29859 | Gm44310 | 0.0000 | No |
| 29860 | Gm44311 | 0.0000 | No |
| 29861 | Gm44312 | 0.0000 | No |
| 29862 | Gm44313 | 0.0000 | No |
| 29863 | Gm44314 | 0.0000 | No |
| 29864 | Gm44315 | 0.0000 | No |
| 29865 | Gm44317 | 0.0000 | No |
| 29866 | Gm44318 | 0.0000 | No |
| 29867 | Gm44319 | 0.0000 | No |
| 29868 | Gm44320 | 0.0000 | No |
| 29869 | Gm44321 | 0.0000 | No |
| 29870 | Gm44323 | 0.0000 | No |
| 29871 | Gm44325 | 0.0000 | No |
| 29872 | Gm44326 | 0.0000 | No |
| 29873 | Gm44327 | 0.0000 | No |
| 29874 | Gm44328 | 0.0000 | No |
| 29875 | Gm44329 | 0.0000 | No |
| 29876 | Gm44330 | 0.0000 | No |
| 29877 | Gm44331 | 0.0000 | No |
| 29878 | Gm44332 | 0.0000 | No |
| 29879 | Gm44333 | 0.0000 | No |
| 29880 | Gm44334 | 0.0000 | No |
| 29881 | Gm44335 | 0.0000 | No |
| 29882 | Gm44336 | 0.0000 | No |
| 29883 | Gm44337 | 0.0000 | No |
| 29884 | Gm44338 | 0.0000 | No |
| 29885 | Gm44339 | 0.0000 | No |
| 29886 | Gm44340 | 0.0000 | No |
| 29887 | Gm44341 | 0.0000 | No |
| 29888 | Gm44342 | 0.0000 | No |
| 29889 | Gm44343 | 0.0000 | No |
| 29890 | Gm44344 | 0.0000 | No |
| 29891 | Gm44345 | 0.0000 | No |
| 29892 | Gm44346 | 0.0000 | No |
| 29893 | Gm44347 | 0.0000 | No |
| 29894 | Gm44348 | 0.0000 | No |
| 29895 | Gm44349 | 0.0000 | No |
| 29896 | Gm44350 | 0.0000 | No |
| 29897 | Gm44352 | 0.0000 | No |

|       |         |        |    |
|-------|---------|--------|----|
| 29898 | Gm44353 | 0.0000 | No |
| 29899 | Gm44354 | 0.0000 | No |
| 29900 | Gm44355 | 0.0000 | No |
| 29901 | Gm44356 | 0.0000 | No |
| 29902 | Gm44357 | 0.0000 | No |
| 29903 | Gm44358 | 0.0000 | No |
| 29904 | Gm44359 | 0.0000 | No |
| 29905 | Gm44361 | 0.0000 | No |
| 29906 | Gm44362 | 0.0000 | No |
| 29907 | Gm44363 | 0.0000 | No |
| 29908 | Gm44364 | 0.0000 | No |
| 29909 | Gm44367 | 0.0000 | No |
| 29910 | Gm44369 | 0.0000 | No |
| 29911 | Gm44370 | 0.0000 | No |
| 29912 | Gm44371 | 0.0000 | No |
| 29913 | Gm44372 | 0.0000 | No |
| 29914 | Gm44373 | 0.0000 | No |
| 29915 | Gm44374 | 0.0000 | No |
| 29916 | Gm44375 | 0.0000 | No |
| 29917 | Gm44376 | 0.0000 | No |
| 29918 | Gm44377 | 0.0000 | No |
| 29919 | Gm44378 | 0.0000 | No |
| 29920 | Gm44379 | 0.0000 | No |
| 29921 | Gm44380 | 0.0000 | No |
| 29922 | Gm44381 | 0.0000 | No |
| 29923 | Gm44382 | 0.0000 | No |
| 29924 | Gm44383 | 0.0000 | No |
| 29925 | Gm44384 | 0.0000 | No |
| 29926 | Gm44385 | 0.0000 | No |
| 29927 | Gm44387 | 0.0000 | No |
| 29928 | Gm44388 | 0.0000 | No |
| 29929 | Gm44389 | 0.0000 | No |
| 29930 | Gm44390 | 0.0000 | No |
| 29931 | Gm44391 | 0.0000 | No |
| 29932 | Gm44392 | 0.0000 | No |
| 29933 | Gm44393 | 0.0000 | No |
| 29934 | Gm44394 | 0.0000 | No |
| 29935 | Gm44395 | 0.0000 | No |
| 29936 | Gm44396 | 0.0000 | No |
| 29937 | Gm44397 | 0.0000 | No |
| 29938 | Gm44400 | 0.0000 | No |
| 29939 | Gm44401 | 0.0000 | No |
| 29940 | Gm44402 | 0.0000 | No |
| 29941 | Gm44403 | 0.0000 | No |
| 29942 | Gm44404 | 0.0000 | No |
| 29943 | Gm44405 | 0.0000 | No |

|       |         |        |    |
|-------|---------|--------|----|
| 29944 | Gm44406 | 0.0000 | No |
| 29945 | Gm44407 | 0.0000 | No |
| 29946 | Gm44408 | 0.0000 | No |
| 29947 | Gm44409 | 0.0000 | No |
| 29948 | Gm44410 | 0.0000 | No |
| 29949 | Gm44411 | 0.0000 | No |
| 29950 | Gm44412 | 0.0000 | No |
| 29951 | Gm44413 | 0.0000 | No |
| 29952 | Gm44414 | 0.0000 | No |
| 29953 | Gm44416 | 0.0000 | No |
| 29954 | Gm44417 | 0.0000 | No |
| 29955 | Gm44418 | 0.0000 | No |
| 29956 | Gm44419 | 0.0000 | No |
| 29957 | Gm44420 | 0.0000 | No |
| 29958 | Gm44421 | 0.0000 | No |
| 29959 | Gm44422 | 0.0000 | No |
| 29960 | Gm44423 | 0.0000 | No |
| 29961 | Gm44424 | 0.0000 | No |
| 29962 | Gm44425 | 0.0000 | No |
| 29963 | Gm44426 | 0.0000 | No |
| 29964 | Gm44427 | 0.0000 | No |
| 29965 | Gm44428 | 0.0000 | No |
| 29966 | Gm44430 | 0.0000 | No |
| 29967 | Gm44431 | 0.0000 | No |
| 29968 | Gm44433 | 0.0000 | No |
| 29969 | Gm44434 | 0.0000 | No |
| 29970 | Gm44436 | 0.0000 | No |
| 29971 | Gm44438 | 0.0000 | No |
| 29972 | Gm44439 | 0.0000 | No |
| 29973 | Gm44440 | 0.0000 | No |
| 29974 | Gm44441 | 0.0000 | No |
| 29975 | Gm44443 | 0.0000 | No |
| 29976 | Gm44445 | 0.0000 | No |
| 29977 | Gm44446 | 0.0000 | No |
| 29978 | Gm44447 | 0.0000 | No |
| 29979 | Gm44448 | 0.0000 | No |
| 29980 | Gm44449 | 0.0000 | No |
| 29981 | Gm44450 | 0.0000 | No |
| 29982 | Gm44451 | 0.0000 | No |
| 29983 | Gm44452 | 0.0000 | No |
| 29984 | Gm44453 | 0.0000 | No |
| 29985 | Gm44454 | 0.0000 | No |
| 29986 | Gm44456 | 0.0000 | No |
| 29987 | Gm44457 | 0.0000 | No |
| 29988 | Gm44458 | 0.0000 | No |
| 29989 | Gm44459 | 0.0000 | No |

|       |         |        |    |
|-------|---------|--------|----|
| 29990 | Gm44460 | 0.0000 | No |
| 29991 | Gm44461 | 0.0000 | No |
| 29992 | Gm44462 | 0.0000 | No |
| 29993 | Gm44464 | 0.0000 | No |
| 29994 | Gm44465 | 0.0000 | No |
| 29995 | Gm44466 | 0.0000 | No |
| 29996 | Gm44467 | 0.0000 | No |
| 29997 | Gm44468 | 0.0000 | No |
| 29998 | Gm44469 | 0.0000 | No |
| 29999 | Gm44470 | 0.0000 | No |
| 30000 | Gm44471 | 0.0000 | No |
| 30001 | Gm44473 | 0.0000 | No |
| 30002 | Gm44474 | 0.0000 | No |
| 30003 | Gm44475 | 0.0000 | No |
| 30004 | Gm44476 | 0.0000 | No |
| 30005 | Gm44477 | 0.0000 | No |
| 30006 | Gm44478 | 0.0000 | No |
| 30007 | Gm44479 | 0.0000 | No |
| 30008 | Gm44480 | 0.0000 | No |
| 30009 | Gm44481 | 0.0000 | No |
| 30010 | Gm44482 | 0.0000 | No |
| 30011 | Gm44483 | 0.0000 | No |
| 30012 | Gm44484 | 0.0000 | No |
| 30013 | Gm44486 | 0.0000 | No |
| 30014 | Gm44487 | 0.0000 | No |
| 30015 | Gm44488 | 0.0000 | No |
| 30016 | Gm44489 | 0.0000 | No |
| 30017 | Gm44490 | 0.0000 | No |
| 30018 | Gm44491 | 0.0000 | No |
| 30019 | Gm44492 | 0.0000 | No |
| 30020 | Gm44493 | 0.0000 | No |
| 30021 | Gm44494 | 0.0000 | No |
| 30022 | Gm44495 | 0.0000 | No |
| 30023 | Gm44496 | 0.0000 | No |
| 30024 | Gm44497 | 0.0000 | No |
| 30025 | Gm44498 | 0.0000 | No |
| 30026 | Gm44499 | 0.0000 | No |
| 30027 | Gm44500 | 0.0000 | No |
| 30028 | Gm44501 | 0.0000 | No |
| 30029 | Gm44503 | 0.0000 | No |
| 30030 | Gm44506 | 0.0000 | No |
| 30031 | Gm44507 | 0.0000 | No |
| 30032 | Gm44508 | 0.0000 | No |
| 30033 | Gm44509 | 0.0000 | No |
| 30034 | Gm4451  | 0.0000 | No |
| 30035 | Gm44510 | 0.0000 | No |

|       |         |        |    |
|-------|---------|--------|----|
| 30036 | Gm44512 | 0.0000 | No |
| 30037 | Gm44513 | 0.0000 | No |
| 30038 | Gm44514 | 0.0000 | No |
| 30039 | Gm44515 | 0.0000 | No |
| 30040 | Gm44517 | 0.0000 | No |
| 30041 | Gm44518 | 0.0000 | No |
| 30042 | Gm44519 | 0.0000 | No |
| 30043 | Gm44520 | 0.0000 | No |
| 30044 | Gm44521 | 0.0000 | No |
| 30045 | Gm44522 | 0.0000 | No |
| 30046 | Gm44523 | 0.0000 | No |
| 30047 | Gm44524 | 0.0000 | No |
| 30048 | Gm44525 | 0.0000 | No |
| 30049 | Gm44526 | 0.0000 | No |
| 30050 | Gm44527 | 0.0000 | No |
| 30051 | Gm44528 | 0.0000 | No |
| 30052 | Gm44529 | 0.0000 | No |
| 30053 | Gm44530 | 0.0000 | No |
| 30054 | Gm44531 | 0.0000 | No |
| 30055 | Gm44532 | 0.0000 | No |
| 30056 | Gm44533 | 0.0000 | No |
| 30057 | Gm44534 | 0.0000 | No |
| 30058 | Gm44535 | 0.0000 | No |
| 30059 | Gm44536 | 0.0000 | No |
| 30060 | Gm44537 | 0.0000 | No |
| 30061 | Gm44539 | 0.0000 | No |
| 30062 | Gm4454  | 0.0000 | No |
| 30063 | Gm44541 | 0.0000 | No |
| 30064 | Gm44542 | 0.0000 | No |
| 30065 | Gm44543 | 0.0000 | No |
| 30066 | Gm44545 | 0.0000 | No |
| 30067 | Gm44546 | 0.0000 | No |
| 30068 | Gm44547 | 0.0000 | No |
| 30069 | Gm44548 | 0.0000 | No |
| 30070 | Gm44549 | 0.0000 | No |
| 30071 | Gm44550 | 0.0000 | No |
| 30072 | Gm44551 | 0.0000 | No |
| 30073 | Gm44552 | 0.0000 | No |
| 30074 | Gm44553 | 0.0000 | No |
| 30075 | Gm44554 | 0.0000 | No |
| 30076 | Gm44555 | 0.0000 | No |
| 30077 | Gm44557 | 0.0000 | No |
| 30078 | Gm44558 | 0.0000 | No |
| 30079 | Gm44559 | 0.0000 | No |
| 30080 | Gm44560 | 0.0000 | No |
| 30081 | Gm44561 | 0.0000 | No |

|       |         |        |    |
|-------|---------|--------|----|
| 30082 | Gm44562 | 0.0000 | No |
| 30083 | Gm44563 | 0.0000 | No |
| 30084 | Gm44564 | 0.0000 | No |
| 30085 | Gm44565 | 0.0000 | No |
| 30086 | Gm44566 | 0.0000 | No |
| 30087 | Gm44567 | 0.0000 | No |
| 30088 | Gm44568 | 0.0000 | No |
| 30089 | Gm44569 | 0.0000 | No |
| 30090 | Gm44571 | 0.0000 | No |
| 30091 | Gm44572 | 0.0000 | No |
| 30092 | Gm44573 | 0.0000 | No |
| 30093 | Gm44574 | 0.0000 | No |
| 30094 | Gm44575 | 0.0000 | No |
| 30095 | Gm44576 | 0.0000 | No |
| 30096 | Gm44577 | 0.0000 | No |
| 30097 | Gm44578 | 0.0000 | No |
| 30098 | Gm44579 | 0.0000 | No |
| 30099 | Gm44580 | 0.0000 | No |
| 30100 | Gm44581 | 0.0000 | No |
| 30101 | Gm44582 | 0.0000 | No |
| 30102 | Gm44583 | 0.0000 | No |
| 30103 | Gm44584 | 0.0000 | No |
| 30104 | Gm44585 | 0.0000 | No |
| 30105 | Gm44588 | 0.0000 | No |
| 30106 | Gm44589 | 0.0000 | No |
| 30107 | Gm4459  | 0.0000 | No |
| 30108 | Gm44590 | 0.0000 | No |
| 30109 | Gm44592 | 0.0000 | No |
| 30110 | Gm44593 | 0.0000 | No |
| 30111 | Gm44594 | 0.0000 | No |
| 30112 | Gm44596 | 0.0000 | No |
| 30113 | Gm44598 | 0.0000 | No |
| 30114 | Gm44599 | 0.0000 | No |
| 30115 | Gm44600 | 0.0000 | No |
| 30116 | Gm44601 | 0.0000 | No |
| 30117 | Gm44602 | 0.0000 | No |
| 30118 | Gm44603 | 0.0000 | No |
| 30119 | Gm44604 | 0.0000 | No |
| 30120 | Gm44605 | 0.0000 | No |
| 30121 | Gm44606 | 0.0000 | No |
| 30122 | Gm44608 | 0.0000 | No |
| 30123 | Gm44609 | 0.0000 | No |
| 30124 | Gm4461  | 0.0000 | No |
| 30125 | Gm44610 | 0.0000 | No |
| 30126 | Gm44611 | 0.0000 | No |
| 30127 | Gm44612 | 0.0000 | No |

|       |         |        |    |
|-------|---------|--------|----|
| 30128 | Gm44613 | 0.0000 | No |
| 30129 | Gm44614 | 0.0000 | No |
| 30130 | Gm44616 | 0.0000 | No |
| 30131 | Gm44617 | 0.0000 | No |
| 30132 | Gm44618 | 0.0000 | No |
| 30133 | Gm44619 | 0.0000 | No |
| 30134 | Gm4462  | 0.0000 | No |
| 30135 | Gm44620 | 0.0000 | No |
| 30136 | Gm44621 | 0.0000 | No |
| 30137 | Gm44623 | 0.0000 | No |
| 30138 | Gm44624 | 0.0000 | No |
| 30139 | Gm44625 | 0.0000 | No |
| 30140 | Gm44627 | 0.0000 | No |
| 30141 | Gm44628 | 0.0000 | No |
| 30142 | Gm44629 | 0.0000 | No |
| 30143 | Gm44630 | 0.0000 | No |
| 30144 | Gm44632 | 0.0000 | No |
| 30145 | Gm44634 | 0.0000 | No |
| 30146 | Gm44635 | 0.0000 | No |
| 30147 | Gm44636 | 0.0000 | No |
| 30148 | Gm44637 | 0.0000 | No |
| 30149 | Gm44638 | 0.0000 | No |
| 30150 | Gm44639 | 0.0000 | No |
| 30151 | Gm44640 | 0.0000 | No |
| 30152 | Gm44642 | 0.0000 | No |
| 30153 | Gm44643 | 0.0000 | No |
| 30154 | Gm44644 | 0.0000 | No |
| 30155 | Gm44645 | 0.0000 | No |
| 30156 | Gm44646 | 0.0000 | No |
| 30157 | Gm44647 | 0.0000 | No |
| 30158 | Gm44648 | 0.0000 | No |
| 30159 | Gm44649 | 0.0000 | No |
| 30160 | Gm44650 | 0.0000 | No |
| 30161 | Gm44651 | 0.0000 | No |
| 30162 | Gm44652 | 0.0000 | No |
| 30163 | Gm44653 | 0.0000 | No |
| 30164 | Gm44654 | 0.0000 | No |
| 30165 | Gm44656 | 0.0000 | No |
| 30166 | Gm44658 | 0.0000 | No |
| 30167 | Gm44661 | 0.0000 | No |
| 30168 | Gm44663 | 0.0000 | No |
| 30169 | Gm44664 | 0.0000 | No |
| 30170 | Gm44666 | 0.0000 | No |
| 30171 | Gm44668 | 0.0000 | No |
| 30172 | Gm44669 | 0.0000 | No |
| 30173 | Gm44670 | 0.0000 | No |



|       |         |        |    |
|-------|---------|--------|----|
| 30174 | Gm44672 | 0.0000 | No |
| 30175 | Gm44673 | 0.0000 | No |
| 30176 | Gm44676 | 0.0000 | No |
| 30177 | Gm44677 | 0.0000 | No |
| 30178 | Gm44678 | 0.0000 | No |
| 30179 | Gm4468  | 0.0000 | No |
| 30180 | Gm44681 | 0.0000 | No |
| 30181 | Gm44682 | 0.0000 | No |
| 30182 | Gm44683 | 0.0000 | No |
| 30183 | Gm44684 | 0.0000 | No |
| 30184 | Gm44685 | 0.0000 | No |
| 30185 | Gm44686 | 0.0000 | No |
| 30186 | Gm44687 | 0.0000 | No |
| 30187 | Gm44688 | 0.0000 | No |
| 30188 | Gm44689 | 0.0000 | No |
| 30189 | Gm44690 | 0.0000 | No |
| 30190 | Gm44691 | 0.0000 | No |
| 30191 | Gm44692 | 0.0000 | No |
| 30192 | Gm44693 | 0.0000 | No |
| 30193 | Gm44694 | 0.0000 | No |
| 30194 | Gm44695 | 0.0000 | No |
| 30195 | Gm44696 | 0.0000 | No |
| 30196 | Gm44697 | 0.0000 | No |
| 30197 | Gm44698 | 0.0000 | No |
| 30198 | Gm44699 | 0.0000 | No |
| 30199 | Gm44700 | 0.0000 | No |
| 30200 | Gm44701 | 0.0000 | No |
| 30201 | Gm44702 | 0.0000 | No |
| 30202 | Gm44703 | 0.0000 | No |
| 30203 | Gm44704 | 0.0000 | No |
| 30204 | Gm44705 | 0.0000 | No |
| 30205 | Gm44707 | 0.0000 | No |
| 30206 | Gm44709 | 0.0000 | No |
| 30207 | Gm44710 | 0.0000 | No |
| 30208 | Gm44711 | 0.0000 | No |
| 30209 | Gm44712 | 0.0000 | No |
| 30210 | Gm44713 | 0.0000 | No |
| 30211 | Gm44714 | 0.0000 | No |
| 30212 | Gm44715 | 0.0000 | No |
| 30213 | Gm44716 | 0.0000 | No |
| 30214 | Gm44718 | 0.0000 | No |
| 30215 | Gm44719 | 0.0000 | No |
| 30216 | Gm44720 | 0.0000 | No |
| 30217 | Gm44723 | 0.0000 | No |
| 30218 | Gm44724 | 0.0000 | No |
| 30219 | Gm44726 | 0.0000 | No |

|       |         |        |    |
|-------|---------|--------|----|
| 30220 | Gm44727 | 0.0000 | No |
| 30221 | Gm44728 | 0.0000 | No |
| 30222 | Gm44729 | 0.0000 | No |
| 30223 | Gm4473  | 0.0000 | No |
| 30224 | Gm44730 | 0.0000 | No |
| 30225 | Gm44731 | 0.0000 | No |
| 30226 | Gm44732 | 0.0000 | No |
| 30227 | Gm44733 | 0.0000 | No |
| 30228 | Gm44734 | 0.0000 | No |
| 30229 | Gm44735 | 0.0000 | No |
| 30230 | Gm44736 | 0.0000 | No |
| 30231 | Gm44737 | 0.0000 | No |
| 30232 | Gm44738 | 0.0000 | No |
| 30233 | Gm44739 | 0.0000 | No |
| 30234 | Gm44740 | 0.0000 | No |
| 30235 | Gm44741 | 0.0000 | No |
| 30236 | Gm44742 | 0.0000 | No |
| 30237 | Gm44743 | 0.0000 | No |
| 30238 | Gm44745 | 0.0000 | No |
| 30239 | Gm44746 | 0.0000 | No |
| 30240 | Gm44747 | 0.0000 | No |
| 30241 | Gm44748 | 0.0000 | No |
| 30242 | Gm44749 | 0.0000 | No |
| 30243 | Gm44750 | 0.0000 | No |
| 30244 | Gm44751 | 0.0000 | No |
| 30245 | Gm44752 | 0.0000 | No |
| 30246 | Gm44753 | 0.0000 | No |
| 30247 | Gm44754 | 0.0000 | No |
| 30248 | Gm44755 | 0.0000 | No |
| 30249 | Gm44756 | 0.0000 | No |
| 30250 | Gm44757 | 0.0000 | No |
| 30251 | Gm44758 | 0.0000 | No |
| 30252 | Gm44759 | 0.0000 | No |
| 30253 | Gm44760 | 0.0000 | No |
| 30254 | Gm44761 | 0.0000 | No |
| 30255 | Gm44762 | 0.0000 | No |
| 30256 | Gm44763 | 0.0000 | No |
| 30257 | Gm44765 | 0.0000 | No |
| 30258 | Gm44766 | 0.0000 | No |
| 30259 | Gm44768 | 0.0000 | No |
| 30260 | Gm44769 | 0.0000 | No |
| 30261 | Gm44771 | 0.0000 | No |
| 30262 | Gm44772 | 0.0000 | No |
| 30263 | Gm44773 | 0.0000 | No |
| 30264 | Gm44774 | 0.0000 | No |
| 30265 | Gm44775 | 0.0000 | No |

|       |         |        |    |
|-------|---------|--------|----|
| 30266 | Gm44776 | 0.0000 | No |
| 30267 | Gm44777 | 0.0000 | No |
| 30268 | Gm44778 | 0.0000 | No |
| 30269 | Gm44779 | 0.0000 | No |
| 30270 | Gm44780 | 0.0000 | No |
| 30271 | Gm44781 | 0.0000 | No |
| 30272 | Gm44782 | 0.0000 | No |
| 30273 | Gm44783 | 0.0000 | No |
| 30274 | Gm44785 | 0.0000 | No |
| 30275 | Gm44786 | 0.0000 | No |
| 30276 | Gm44787 | 0.0000 | No |
| 30277 | Gm44788 | 0.0000 | No |
| 30278 | Gm44789 | 0.0000 | No |
| 30279 | Gm4479  | 0.0000 | No |
| 30280 | Gm44790 | 0.0000 | No |
| 30281 | Gm44791 | 0.0000 | No |
| 30282 | Gm44792 | 0.0000 | No |
| 30283 | Gm44793 | 0.0000 | No |
| 30284 | Gm44794 | 0.0000 | No |
| 30285 | Gm44796 | 0.0000 | No |
| 30286 | Gm44797 | 0.0000 | No |
| 30287 | Gm44798 | 0.0000 | No |
| 30288 | Gm44799 | 0.0000 | No |
| 30289 | Gm44800 | 0.0000 | No |
| 30290 | Gm44801 | 0.0000 | No |
| 30291 | Gm44802 | 0.0000 | No |
| 30292 | Gm44803 | 0.0000 | No |
| 30293 | Gm44804 | 0.0000 | No |
| 30294 | Gm44805 | 0.0000 | No |
| 30295 | Gm44806 | 0.0000 | No |
| 30296 | Gm44807 | 0.0000 | No |
| 30297 | Gm44808 | 0.0000 | No |
| 30298 | Gm44810 | 0.0000 | No |
| 30299 | Gm44812 | 0.0000 | No |
| 30300 | Gm44813 | 0.0000 | No |
| 30301 | Gm44814 | 0.0000 | No |
| 30302 | Gm44816 | 0.0000 | No |
| 30303 | Gm44817 | 0.0000 | No |
| 30304 | Gm44818 | 0.0000 | No |
| 30305 | Gm44819 | 0.0000 | No |
| 30306 | Gm4482  | 0.0000 | No |
| 30307 | Gm44820 | 0.0000 | No |
| 30308 | Gm44821 | 0.0000 | No |
| 30309 | Gm44822 | 0.0000 | No |
| 30310 | Gm44823 | 0.0000 | No |
| 30311 | Gm44824 | 0.0000 | No |

|       |         |        |    |
|-------|---------|--------|----|
| 30312 | Gm44825 | 0.0000 | No |
| 30313 | Gm44826 | 0.0000 | No |
| 30314 | Gm44827 | 0.0000 | No |
| 30315 | Gm44828 | 0.0000 | No |
| 30316 | Gm44829 | 0.0000 | No |
| 30317 | Gm44830 | 0.0000 | No |
| 30318 | Gm44831 | 0.0000 | No |
| 30319 | Gm44832 | 0.0000 | No |
| 30320 | Gm44833 | 0.0000 | No |
| 30321 | Gm44835 | 0.0000 | No |
| 30322 | Gm44836 | 0.0000 | No |
| 30323 | Gm44837 | 0.0000 | No |
| 30324 | Gm44838 | 0.0000 | No |
| 30325 | Gm44839 | 0.0000 | No |
| 30326 | Gm44840 | 0.0000 | No |
| 30327 | Gm44841 | 0.0000 | No |
| 30328 | Gm44842 | 0.0000 | No |
| 30329 | Gm44843 | 0.0000 | No |
| 30330 | Gm44844 | 0.0000 | No |
| 30331 | Gm44845 | 0.0000 | No |
| 30332 | Gm44846 | 0.0000 | No |
| 30333 | Gm44848 | 0.0000 | No |
| 30334 | Gm44849 | 0.0000 | No |
| 30335 | Gm44851 | 0.0000 | No |
| 30336 | Gm44852 | 0.0000 | No |
| 30337 | Gm44853 | 0.0000 | No |
| 30338 | Gm44855 | 0.0000 | No |
| 30339 | Gm44856 | 0.0000 | No |
| 30340 | Gm44857 | 0.0000 | No |
| 30341 | Gm44858 | 0.0000 | No |
| 30342 | Gm44859 | 0.0000 | No |
| 30343 | Gm44860 | 0.0000 | No |
| 30344 | Gm44861 | 0.0000 | No |
| 30345 | Gm44863 | 0.0000 | No |
| 30346 | Gm44864 | 0.0000 | No |
| 30347 | Gm44866 | 0.0000 | No |
| 30348 | Gm44867 | 0.0000 | No |
| 30349 | Gm44870 | 0.0000 | No |
| 30350 | Gm44871 | 0.0000 | No |
| 30351 | Gm44872 | 0.0000 | No |
| 30352 | Gm44873 | 0.0000 | No |
| 30353 | Gm44874 | 0.0000 | No |
| 30354 | Gm44875 | 0.0000 | No |
| 30355 | Gm44876 | 0.0000 | No |
| 30356 | Gm44877 | 0.0000 | No |
| 30357 | Gm44878 | 0.0000 | No |

|       |         |        |    |
|-------|---------|--------|----|
| 30358 | Gm44881 | 0.0000 | No |
| 30359 | Gm44882 | 0.0000 | No |
| 30360 | Gm44883 | 0.0000 | No |
| 30361 | Gm44884 | 0.0000 | No |
| 30362 | Gm44885 | 0.0000 | No |
| 30363 | Gm44886 | 0.0000 | No |
| 30364 | Gm44887 | 0.0000 | No |
| 30365 | Gm44889 | 0.0000 | No |
| 30366 | Gm44890 | 0.0000 | No |
| 30367 | Gm44891 | 0.0000 | No |
| 30368 | Gm44893 | 0.0000 | No |
| 30369 | Gm44894 | 0.0000 | No |
| 30370 | Gm44895 | 0.0000 | No |
| 30371 | Gm44896 | 0.0000 | No |
| 30372 | Gm44897 | 0.0000 | No |
| 30373 | Gm44898 | 0.0000 | No |
| 30374 | Gm44899 | 0.0000 | No |
| 30375 | Gm44900 | 0.0000 | No |
| 30376 | Gm44901 | 0.0000 | No |
| 30377 | Gm44902 | 0.0000 | No |
| 30378 | Gm44903 | 0.0000 | No |
| 30379 | Gm44904 | 0.0000 | No |
| 30380 | Gm44905 | 0.0000 | No |
| 30381 | Gm44906 | 0.0000 | No |
| 30382 | Gm44907 | 0.0000 | No |
| 30383 | Gm44908 | 0.0000 | No |
| 30384 | Gm44909 | 0.0000 | No |
| 30385 | Gm4491  | 0.0000 | No |
| 30386 | Gm44910 | 0.0000 | No |
| 30387 | Gm44911 | 0.0000 | No |
| 30388 | Gm44912 | 0.0000 | No |
| 30389 | Gm44914 | 0.0000 | No |
| 30390 | Gm44915 | 0.0000 | No |
| 30391 | Gm44916 | 0.0000 | No |
| 30392 | Gm44917 | 0.0000 | No |
| 30393 | Gm44918 | 0.0000 | No |
| 30394 | Gm44919 | 0.0000 | No |
| 30395 | Gm44921 | 0.0000 | No |
| 30396 | Gm44922 | 0.0000 | No |
| 30397 | Gm44923 | 0.0000 | No |
| 30398 | Gm44924 | 0.0000 | No |
| 30399 | Gm44927 | 0.0000 | No |
| 30400 | Gm44928 | 0.0000 | No |
| 30401 | Gm44929 | 0.0000 | No |
| 30402 | Gm44930 | 0.0000 | No |
| 30403 | Gm44931 | 0.0000 | No |

|       |         |        |    |
|-------|---------|--------|----|
| 30404 | Gm44932 | 0.0000 | No |
| 30405 | Gm44934 | 0.0000 | No |
| 30406 | Gm44935 | 0.0000 | No |
| 30407 | Gm44936 | 0.0000 | No |
| 30408 | Gm44937 | 0.0000 | No |
| 30409 | Gm44938 | 0.0000 | No |
| 30410 | Gm44939 | 0.0000 | No |
| 30411 | Gm44940 | 0.0000 | No |
| 30412 | Gm44941 | 0.0000 | No |
| 30413 | Gm44942 | 0.0000 | No |
| 30414 | Gm44943 | 0.0000 | No |
| 30415 | Gm44944 | 0.0000 | No |
| 30416 | Gm44945 | 0.0000 | No |
| 30417 | Gm44946 | 0.0000 | No |
| 30418 | Gm44947 | 0.0000 | No |
| 30419 | Gm44948 | 0.0000 | No |
| 30420 | Gm44950 | 0.0000 | No |
| 30421 | Gm44951 | 0.0000 | No |
| 30422 | Gm44952 | 0.0000 | No |
| 30423 | Gm44953 | 0.0000 | No |
| 30424 | Gm44955 | 0.0000 | No |
| 30425 | Gm44956 | 0.0000 | No |
| 30426 | Gm44957 | 0.0000 | No |
| 30427 | Gm44960 | 0.0000 | No |
| 30428 | Gm44961 | 0.0000 | No |
| 30429 | Gm44962 | 0.0000 | No |
| 30430 | Gm44963 | 0.0000 | No |
| 30431 | Gm44964 | 0.0000 | No |
| 30432 | Gm44965 | 0.0000 | No |
| 30433 | Gm44966 | 0.0000 | No |
| 30434 | Gm44967 | 0.0000 | No |
| 30435 | Gm44968 | 0.0000 | No |
| 30436 | Gm44969 | 0.0000 | No |
| 30437 | Gm44970 | 0.0000 | No |
| 30438 | Gm44971 | 0.0000 | No |
| 30439 | Gm44972 | 0.0000 | No |
| 30440 | Gm44974 | 0.0000 | No |
| 30441 | Gm44975 | 0.0000 | No |
| 30442 | Gm44976 | 0.0000 | No |
| 30443 | Gm44977 | 0.0000 | No |
| 30444 | Gm44978 | 0.0000 | No |
| 30445 | Gm4498  | 0.0000 | No |
| 30446 | Gm44980 | 0.0000 | No |
| 30447 | Gm44981 | 0.0000 | No |
| 30448 | Gm44982 | 0.0000 | No |
| 30449 | Gm44983 | 0.0000 | No |

|       |         |        |    |
|-------|---------|--------|----|
| 30450 | Gm44984 | 0.0000 | No |
| 30451 | Gm44986 | 0.0000 | No |
| 30452 | Gm44988 | 0.0000 | No |
| 30453 | Gm44989 | 0.0000 | No |
| 30454 | Gm44990 | 0.0000 | No |
| 30455 | Gm44991 | 0.0000 | No |
| 30456 | Gm44992 | 0.0000 | No |
| 30457 | Gm44993 | 0.0000 | No |
| 30458 | Gm44995 | 0.0000 | No |
| 30459 | Gm44996 | 0.0000 | No |
| 30460 | Gm44997 | 0.0000 | No |
| 30461 | Gm44998 | 0.0000 | No |
| 30462 | Gm44999 | 0.0000 | No |
| 30463 | Gm45000 | 0.0000 | No |
| 30464 | Gm45001 | 0.0000 | No |
| 30465 | Gm45002 | 0.0000 | No |
| 30466 | Gm45003 | 0.0000 | No |
| 30467 | Gm45004 | 0.0000 | No |
| 30468 | Gm45006 | 0.0000 | No |
| 30469 | Gm45007 | 0.0000 | No |
| 30470 | Gm45008 | 0.0000 | No |
| 30471 | Gm45009 | 0.0000 | No |
| 30472 | Gm4501  | 0.0000 | No |
| 30473 | Gm45010 | 0.0000 | No |
| 30474 | Gm45012 | 0.0000 | No |
| 30475 | Gm45013 | 0.0000 | No |
| 30476 | Gm45014 | 0.0000 | No |
| 30477 | Gm45015 | 0.0000 | No |
| 30478 | Gm45016 | 0.0000 | No |
| 30479 | Gm45017 | 0.0000 | No |
| 30480 | Gm45018 | 0.0000 | No |
| 30481 | Gm45019 | 0.0000 | No |
| 30482 | Gm45020 | 0.0000 | No |
| 30483 | Gm45021 | 0.0000 | No |
| 30484 | Gm45022 | 0.0000 | No |
| 30485 | Gm45023 | 0.0000 | No |
| 30486 | Gm45024 | 0.0000 | No |
| 30487 | Gm45026 | 0.0000 | No |
| 30488 | Gm45027 | 0.0000 | No |
| 30489 | Gm45028 | 0.0000 | No |
| 30490 | Gm45029 | 0.0000 | No |
| 30491 | Gm45030 | 0.0000 | No |
| 30492 | Gm45031 | 0.0000 | No |
| 30493 | Gm45033 | 0.0000 | No |
| 30494 | Gm45034 | 0.0000 | No |
| 30495 | Gm45035 | 0.0000 | No |

|       |         |        |    |
|-------|---------|--------|----|
| 30496 | Gm45036 | 0.0000 | No |
| 30497 | Gm45038 | 0.0000 | No |
| 30498 | Gm45039 | 0.0000 | No |
| 30499 | Gm45040 | 0.0000 | No |
| 30500 | Gm45041 | 0.0000 | No |
| 30501 | Gm45043 | 0.0000 | No |
| 30502 | Gm45044 | 0.0000 | No |
| 30503 | Gm45045 | 0.0000 | No |
| 30504 | Gm45046 | 0.0000 | No |
| 30505 | Gm45047 | 0.0000 | No |
| 30506 | Gm45049 | 0.0000 | No |
| 30507 | Gm45050 | 0.0000 | No |
| 30508 | Gm45051 | 0.0000 | No |
| 30509 | Gm45052 | 0.0000 | No |
| 30510 | Gm45053 | 0.0000 | No |
| 30511 | Gm45055 | 0.0000 | No |
| 30512 | Gm45057 | 0.0000 | No |
| 30513 | Gm45058 | 0.0000 | No |
| 30514 | Gm45059 | 0.0000 | No |
| 30515 | Gm45060 | 0.0000 | No |
| 30516 | Gm45061 | 0.0000 | No |
| 30517 | Gm45062 | 0.0000 | No |
| 30518 | Gm45063 | 0.0000 | No |
| 30519 | Gm45064 | 0.0000 | No |
| 30520 | Gm45065 | 0.0000 | No |
| 30521 | Gm45066 | 0.0000 | No |
| 30522 | Gm45068 | 0.0000 | No |
| 30523 | Gm45069 | 0.0000 | No |
| 30524 | Gm45070 | 0.0000 | No |
| 30525 | Gm45071 | 0.0000 | No |
| 30526 | Gm45072 | 0.0000 | No |
| 30527 | Gm45073 | 0.0000 | No |
| 30528 | Gm45074 | 0.0000 | No |
| 30529 | Gm45075 | 0.0000 | No |
| 30530 | Gm45076 | 0.0000 | No |
| 30531 | Gm45077 | 0.0000 | No |
| 30532 | Gm45079 | 0.0000 | No |
| 30533 | Gm45080 | 0.0000 | No |
| 30534 | Gm45081 | 0.0000 | No |
| 30535 | Gm45083 | 0.0000 | No |
| 30536 | Gm45084 | 0.0000 | No |
| 30537 | Gm45085 | 0.0000 | No |
| 30538 | Gm45086 | 0.0000 | No |
| 30539 | Gm45087 | 0.0000 | No |
| 30540 | Gm45088 | 0.0000 | No |
| 30541 | Gm45089 | 0.0000 | No |



|       |         |        |    |
|-------|---------|--------|----|
| 30542 | Gm45090 | 0.0000 | No |
| 30543 | Gm45092 | 0.0000 | No |
| 30544 | Gm45093 | 0.0000 | No |
| 30545 | Gm45094 | 0.0000 | No |
| 30546 | Gm45095 | 0.0000 | No |
| 30547 | Gm45097 | 0.0000 | No |
| 30548 | Gm45099 | 0.0000 | No |
| 30549 | Gm45100 | 0.0000 | No |
| 30550 | Gm45101 | 0.0000 | No |
| 30551 | Gm45102 | 0.0000 | No |
| 30552 | Gm45105 | 0.0000 | No |
| 30553 | Gm45106 | 0.0000 | No |
| 30554 | Gm45107 | 0.0000 | No |
| 30555 | Gm45108 | 0.0000 | No |
| 30556 | Gm45109 | 0.0000 | No |
| 30557 | Gm45110 | 0.0000 | No |
| 30558 | Gm45111 | 0.0000 | No |
| 30559 | Gm45112 | 0.0000 | No |
| 30560 | Gm45113 | 0.0000 | No |
| 30561 | Gm45114 | 0.0000 | No |
| 30562 | Gm45115 | 0.0000 | No |
| 30563 | Gm45116 | 0.0000 | No |
| 30564 | Gm45117 | 0.0000 | No |
| 30565 | Gm45118 | 0.0000 | No |
| 30566 | Gm45119 | 0.0000 | No |
| 30567 | Gm45120 | 0.0000 | No |
| 30568 | Gm45121 | 0.0000 | No |
| 30569 | Gm45122 | 0.0000 | No |
| 30570 | Gm45123 | 0.0000 | No |
| 30571 | Gm45125 | 0.0000 | No |
| 30572 | Gm45126 | 0.0000 | No |
| 30573 | Gm45129 | 0.0000 | No |
| 30574 | Gm4513  | 0.0000 | No |
| 30575 | Gm45130 | 0.0000 | No |
| 30576 | Gm45133 | 0.0000 | No |
| 30577 | Gm45134 | 0.0000 | No |
| 30578 | Gm45135 | 0.0000 | No |
| 30579 | Gm45137 | 0.0000 | No |
| 30580 | Gm45139 | 0.0000 | No |
| 30581 | Gm45140 | 0.0000 | No |
| 30582 | Gm45142 | 0.0000 | No |
| 30583 | Gm45143 | 0.0000 | No |
| 30584 | Gm45144 | 0.0000 | No |
| 30585 | Gm45145 | 0.0000 | No |
| 30586 | Gm45146 | 0.0000 | No |
| 30587 | Gm45147 | 0.0000 | No |

|       |         |        |    |
|-------|---------|--------|----|
| 30588 | Gm45148 | 0.0000 | No |
| 30589 | Gm45149 | 0.0000 | No |
| 30590 | Gm45150 | 0.0000 | No |
| 30591 | Gm45151 | 0.0000 | No |
| 30592 | Gm45153 | 0.0000 | No |
| 30593 | Gm45154 | 0.0000 | No |
| 30594 | Gm45156 | 0.0000 | No |
| 30595 | Gm45157 | 0.0000 | No |
| 30596 | Gm45158 | 0.0000 | No |
| 30597 | Gm45159 | 0.0000 | No |
| 30598 | Gm45160 | 0.0000 | No |
| 30599 | Gm45161 | 0.0000 | No |
| 30600 | Gm45162 | 0.0000 | No |
| 30601 | Gm45163 | 0.0000 | No |
| 30602 | Gm45164 | 0.0000 | No |
| 30603 | Gm45167 | 0.0000 | No |
| 30604 | Gm45168 | 0.0000 | No |
| 30605 | Gm45169 | 0.0000 | No |
| 30606 | Gm45170 | 0.0000 | No |
| 30607 | Gm45172 | 0.0000 | No |
| 30608 | Gm45173 | 0.0000 | No |
| 30609 | Gm45174 | 0.0000 | No |
| 30610 | Gm45175 | 0.0000 | No |
| 30611 | Gm45176 | 0.0000 | No |
| 30612 | Gm45177 | 0.0000 | No |
| 30613 | Gm45178 | 0.0000 | No |
| 30614 | Gm45179 | 0.0000 | No |
| 30615 | Gm4518  | 0.0000 | No |
| 30616 | Gm45180 | 0.0000 | No |
| 30617 | Gm45181 | 0.0000 | No |
| 30618 | Gm45182 | 0.0000 | No |
| 30619 | Gm45184 | 0.0000 | No |
| 30620 | Gm45185 | 0.0000 | No |
| 30621 | Gm45186 | 0.0000 | No |
| 30622 | Gm45187 | 0.0000 | No |
| 30623 | Gm45188 | 0.0000 | No |
| 30624 | Gm45189 | 0.0000 | No |
| 30625 | Gm45190 | 0.0000 | No |
| 30626 | Gm45191 | 0.0000 | No |
| 30627 | Gm45192 | 0.0000 | No |
| 30628 | Gm45193 | 0.0000 | No |
| 30629 | Gm45195 | 0.0000 | No |
| 30630 | Gm45196 | 0.0000 | No |
| 30631 | Gm45197 | 0.0000 | No |
| 30632 | Gm45198 | 0.0000 | No |
| 30633 | Gm45199 | 0.0000 | No |

|       |         |        |    |
|-------|---------|--------|----|
| 30634 | Gm45200 | 0.0000 | No |
| 30635 | Gm45201 | 0.0000 | No |
| 30636 | Gm45203 | 0.0000 | No |
| 30637 | Gm45204 | 0.0000 | No |
| 30638 | Gm45205 | 0.0000 | No |
| 30639 | Gm45206 | 0.0000 | No |
| 30640 | Gm45207 | 0.0000 | No |
| 30641 | Gm45209 | 0.0000 | No |
| 30642 | Gm45210 | 0.0000 | No |
| 30643 | Gm45211 | 0.0000 | No |
| 30644 | Gm45212 | 0.0000 | No |
| 30645 | Gm45213 | 0.0000 | No |
| 30646 | Gm45214 | 0.0000 | No |
| 30647 | Gm45215 | 0.0000 | No |
| 30648 | Gm45216 | 0.0000 | No |
| 30649 | Gm45217 | 0.0000 | No |
| 30650 | Gm45218 | 0.0000 | No |
| 30651 | Gm45219 | 0.0000 | No |
| 30652 | Gm45220 | 0.0000 | No |
| 30653 | Gm45221 | 0.0000 | No |
| 30654 | Gm45222 | 0.0000 | No |
| 30655 | Gm45223 | 0.0000 | No |
| 30656 | Gm45224 | 0.0000 | No |
| 30657 | Gm45225 | 0.0000 | No |
| 30658 | Gm45226 | 0.0000 | No |
| 30659 | Gm45227 | 0.0000 | No |
| 30660 | Gm45228 | 0.0000 | No |
| 30661 | Gm45229 | 0.0000 | No |
| 30662 | Gm45231 | 0.0000 | No |
| 30663 | Gm45232 | 0.0000 | No |
| 30664 | Gm45233 | 0.0000 | No |
| 30665 | Gm45234 | 0.0000 | No |
| 30666 | Gm45235 | 0.0000 | No |
| 30667 | Gm45236 | 0.0000 | No |
| 30668 | Gm45239 | 0.0000 | No |
| 30669 | Gm45240 | 0.0000 | No |
| 30670 | Gm45241 | 0.0000 | No |
| 30671 | Gm45242 | 0.0000 | No |
| 30672 | Gm45243 | 0.0000 | No |
| 30673 | Gm45245 | 0.0000 | No |
| 30674 | Gm45246 | 0.0000 | No |
| 30675 | Gm45248 | 0.0000 | No |
| 30676 | Gm45249 | 0.0000 | No |
| 30677 | Gm4525  | 0.0000 | No |
| 30678 | Gm45250 | 0.0000 | No |
| 30679 | Gm45251 | 0.0000 | No |

|       |         |        |    |
|-------|---------|--------|----|
| 30680 | Gm45252 | 0.0000 | No |
| 30681 | Gm45253 | 0.0000 | No |
| 30682 | Gm45254 | 0.0000 | No |
| 30683 | Gm45255 | 0.0000 | No |
| 30684 | Gm45256 | 0.0000 | No |
| 30685 | Gm45257 | 0.0000 | No |
| 30686 | Gm45258 | 0.0000 | No |
| 30687 | Gm45259 | 0.0000 | No |
| 30688 | Gm4526  | 0.0000 | No |
| 30689 | Gm45261 | 0.0000 | No |
| 30690 | Gm45262 | 0.0000 | No |
| 30691 | Gm45263 | 0.0000 | No |
| 30692 | Gm45264 | 0.0000 | No |
| 30693 | Gm45265 | 0.0000 | No |
| 30694 | Gm45266 | 0.0000 | No |
| 30695 | Gm45267 | 0.0000 | No |
| 30696 | Gm45268 | 0.0000 | No |
| 30697 | Gm45269 | 0.0000 | No |
| 30698 | Gm45270 | 0.0000 | No |
| 30699 | Gm45273 | 0.0000 | No |
| 30700 | Gm45274 | 0.0000 | No |
| 30701 | Gm45275 | 0.0000 | No |
| 30702 | Gm45276 | 0.0000 | No |
| 30703 | Gm45278 | 0.0000 | No |
| 30704 | Gm45279 | 0.0000 | No |
| 30705 | Gm4528  | 0.0000 | No |
| 30706 | Gm45280 | 0.0000 | No |
| 30707 | Gm45281 | 0.0000 | No |
| 30708 | Gm45282 | 0.0000 | No |
| 30709 | Gm45283 | 0.0000 | No |
| 30710 | Gm45285 | 0.0000 | No |
| 30711 | Gm45286 | 0.0000 | No |
| 30712 | Gm45288 | 0.0000 | No |
| 30713 | Gm45289 | 0.0000 | No |
| 30714 | Gm45290 | 0.0000 | No |
| 30715 | Gm45291 | 0.0000 | No |
| 30716 | Gm45292 | 0.0000 | No |
| 30717 | Gm45293 | 0.0000 | No |
| 30718 | Gm45295 | 0.0000 | No |
| 30719 | Gm45296 | 0.0000 | No |
| 30720 | Gm45298 | 0.0000 | No |
| 30721 | Gm45299 | 0.0000 | No |
| 30722 | Gm45300 | 0.0000 | No |
| 30723 | Gm45301 | 0.0000 | No |
| 30724 | Gm45303 | 0.0000 | No |
| 30725 | Gm45304 | 0.0000 | No |

|       |         |        |    |
|-------|---------|--------|----|
| 30726 | Gm45305 | 0.0000 | No |
| 30727 | Gm45306 | 0.0000 | No |
| 30728 | Gm45307 | 0.0000 | No |
| 30729 | Gm45308 | 0.0000 | No |
| 30730 | Gm45309 | 0.0000 | No |
| 30731 | Gm45310 | 0.0000 | No |
| 30732 | Gm45311 | 0.0000 | No |
| 30733 | Gm45312 | 0.0000 | No |
| 30734 | Gm45313 | 0.0000 | No |
| 30735 | Gm45314 | 0.0000 | No |
| 30736 | Gm45315 | 0.0000 | No |
| 30737 | Gm45316 | 0.0000 | No |
| 30738 | Gm45317 | 0.0000 | No |
| 30739 | Gm45319 | 0.0000 | No |
| 30740 | Gm45320 | 0.0000 | No |
| 30741 | Gm45322 | 0.0000 | No |
| 30742 | Gm45324 | 0.0000 | No |
| 30743 | Gm45326 | 0.0000 | No |
| 30744 | Gm45327 | 0.0000 | No |
| 30745 | Gm45328 | 0.0000 | No |
| 30746 | Gm45329 | 0.0000 | No |
| 30747 | Gm45330 | 0.0000 | No |
| 30748 | Gm45331 | 0.0000 | No |
| 30749 | Gm45333 | 0.0000 | No |
| 30750 | Gm45334 | 0.0000 | No |
| 30751 | Gm45335 | 0.0000 | No |
| 30752 | Gm45336 | 0.0000 | No |
| 30753 | Gm45337 | 0.0000 | No |
| 30754 | Gm45338 | 0.0000 | No |
| 30755 | Gm45341 | 0.0000 | No |
| 30756 | Gm45342 | 0.0000 | No |
| 30757 | Gm45343 | 0.0000 | No |
| 30758 | Gm45344 | 0.0000 | No |
| 30759 | Gm45345 | 0.0000 | No |
| 30760 | Gm45346 | 0.0000 | No |
| 30761 | Gm45347 | 0.0000 | No |
| 30762 | Gm45348 | 0.0000 | No |
| 30763 | Gm4535  | 0.0000 | No |
| 30764 | Gm45350 | 0.0000 | No |
| 30765 | Gm45351 | 0.0000 | No |
| 30766 | Gm45353 | 0.0000 | No |
| 30767 | Gm45354 | 0.0000 | No |
| 30768 | Gm45355 | 0.0000 | No |
| 30769 | Gm45356 | 0.0000 | No |
| 30770 | Gm45357 | 0.0000 | No |
| 30771 | Gm45358 | 0.0000 | No |

|       |         |        |    |
|-------|---------|--------|----|
| 30772 | Gm45359 | 0.0000 | No |
| 30773 | Gm4536  | 0.0000 | No |
| 30774 | Gm45360 | 0.0000 | No |
| 30775 | Gm45361 | 0.0000 | No |
| 30776 | Gm45362 | 0.0000 | No |
| 30777 | Gm45363 | 0.0000 | No |
| 30778 | Gm45364 | 0.0000 | No |
| 30779 | Gm45365 | 0.0000 | No |
| 30780 | Gm45366 | 0.0000 | No |
| 30781 | Gm45367 | 0.0000 | No |
| 30782 | Gm45371 | 0.0000 | No |
| 30783 | Gm45372 | 0.0000 | No |
| 30784 | Gm45374 | 0.0000 | No |
| 30785 | Gm45375 | 0.0000 | No |
| 30786 | Gm45378 | 0.0000 | No |
| 30787 | Gm45379 | 0.0000 | No |
| 30788 | Gm45380 | 0.0000 | No |
| 30789 | Gm45381 | 0.0000 | No |
| 30790 | Gm45382 | 0.0000 | No |
| 30791 | Gm45383 | 0.0000 | No |
| 30792 | Gm45384 | 0.0000 | No |
| 30793 | Gm45385 | 0.0000 | No |
| 30794 | Gm45386 | 0.0000 | No |
| 30795 | Gm45387 | 0.0000 | No |
| 30796 | Gm45389 | 0.0000 | No |
| 30797 | Gm45390 | 0.0000 | No |
| 30798 | Gm45391 | 0.0000 | No |
| 30799 | Gm45392 | 0.0000 | No |
| 30800 | Gm45393 | 0.0000 | No |
| 30801 | Gm45394 | 0.0000 | No |
| 30802 | Gm45396 | 0.0000 | No |
| 30803 | Gm45397 | 0.0000 | No |
| 30804 | Gm45398 | 0.0000 | No |
| 30805 | Gm45399 | 0.0000 | No |
| 30806 | Gm4540  | 0.0000 | No |
| 30807 | Gm45400 | 0.0000 | No |
| 30808 | Gm45401 | 0.0000 | No |
| 30809 | Gm45402 | 0.0000 | No |
| 30810 | Gm45403 | 0.0000 | No |
| 30811 | Gm45404 | 0.0000 | No |
| 30812 | Gm45405 | 0.0000 | No |
| 30813 | Gm45406 | 0.0000 | No |
| 30814 | Gm45407 | 0.0000 | No |
| 30815 | Gm45408 | 0.0000 | No |
| 30816 | Gm45409 | 0.0000 | No |
| 30817 | Gm4541  | 0.0000 | No |

|       |         |        |    |
|-------|---------|--------|----|
| 30818 | Gm45410 | 0.0000 | No |
| 30819 | Gm45411 | 0.0000 | No |
| 30820 | Gm45412 | 0.0000 | No |
| 30821 | Gm45414 | 0.0000 | No |
| 30822 | Gm45415 | 0.0000 | No |
| 30823 | Gm45417 | 0.0000 | No |
| 30824 | Gm45418 | 0.0000 | No |
| 30825 | Gm45420 | 0.0000 | No |
| 30826 | Gm45421 | 0.0000 | No |
| 30827 | Gm45422 | 0.0000 | No |
| 30828 | Gm45423 | 0.0000 | No |
| 30829 | Gm45425 | 0.0000 | No |
| 30830 | Gm45426 | 0.0000 | No |
| 30831 | Gm45427 | 0.0000 | No |
| 30832 | Gm45428 | 0.0000 | No |
| 30833 | Gm45429 | 0.0000 | No |
| 30834 | Gm45431 | 0.0000 | No |
| 30835 | Gm45432 | 0.0000 | No |
| 30836 | Gm45433 | 0.0000 | No |
| 30837 | Gm45434 | 0.0000 | No |
| 30838 | Gm45435 | 0.0000 | No |
| 30839 | Gm45436 | 0.0000 | No |
| 30840 | Gm45437 | 0.0000 | No |
| 30841 | Gm45438 | 0.0000 | No |
| 30842 | Gm45439 | 0.0000 | No |
| 30843 | Gm45441 | 0.0000 | No |
| 30844 | Gm45442 | 0.0000 | No |
| 30845 | Gm45444 | 0.0000 | No |
| 30846 | Gm45445 | 0.0000 | No |
| 30847 | Gm45446 | 0.0000 | No |
| 30848 | Gm45447 | 0.0000 | No |
| 30849 | Gm4545  | 0.0000 | No |
| 30850 | Gm45450 | 0.0000 | No |
| 30851 | Gm45452 | 0.0000 | No |
| 30852 | Gm45453 | 0.0000 | No |
| 30853 | Gm45454 | 0.0000 | No |
| 30854 | Gm45455 | 0.0000 | No |
| 30855 | Gm45457 | 0.0000 | No |
| 30856 | Gm45460 | 0.0000 | No |
| 30857 | Gm45461 | 0.0000 | No |
| 30858 | Gm45462 | 0.0000 | No |
| 30859 | Gm45463 | 0.0000 | No |
| 30860 | Gm45464 | 0.0000 | No |
| 30861 | Gm45465 | 0.0000 | No |
| 30862 | Gm45466 | 0.0000 | No |
| 30863 | Gm45467 | 0.0000 | No |

|       |         |        |    |
|-------|---------|--------|----|
| 30864 | Gm45468 | 0.0000 | No |
| 30865 | Gm45469 | 0.0000 | No |
| 30866 | Gm45470 | 0.0000 | No |
| 30867 | Gm45471 | 0.0000 | No |
| 30868 | Gm45472 | 0.0000 | No |
| 30869 | Gm45473 | 0.0000 | No |
| 30870 | Gm45474 | 0.0000 | No |
| 30871 | Gm45475 | 0.0000 | No |
| 30872 | Gm45476 | 0.0000 | No |
| 30873 | Gm45478 | 0.0000 | No |
| 30874 | Gm45479 | 0.0000 | No |
| 30875 | Gm4548  | 0.0000 | No |
| 30876 | Gm45480 | 0.0000 | No |
| 30877 | Gm45481 | 0.0000 | No |
| 30878 | Gm45482 | 0.0000 | No |
| 30879 | Gm45483 | 0.0000 | No |
| 30880 | Gm45484 | 0.0000 | No |
| 30881 | Gm45486 | 0.0000 | No |
| 30882 | Gm45487 | 0.0000 | No |
| 30883 | Gm45490 | 0.0000 | No |
| 30884 | Gm45491 | 0.0000 | No |
| 30885 | Gm45492 | 0.0000 | No |
| 30886 | Gm45493 | 0.0000 | No |
| 30887 | Gm45495 | 0.0000 | No |
| 30888 | Gm45497 | 0.0000 | No |
| 30889 | Gm45498 | 0.0000 | No |
| 30890 | Gm45499 | 0.0000 | No |
| 30891 | Gm45500 | 0.0000 | No |
| 30892 | Gm45501 | 0.0000 | No |
| 30893 | Gm45502 | 0.0000 | No |
| 30894 | Gm45503 | 0.0000 | No |
| 30895 | Gm45504 | 0.0000 | No |
| 30896 | Gm45505 | 0.0000 | No |
| 30897 | Gm45507 | 0.0000 | No |
| 30898 | Gm45508 | 0.0000 | No |
| 30899 | Gm45509 | 0.0000 | No |
| 30900 | Gm45510 | 0.0000 | No |
| 30901 | Gm45511 | 0.0000 | No |
| 30902 | Gm45512 | 0.0000 | No |
| 30903 | Gm45513 | 0.0000 | No |
| 30904 | Gm45514 | 0.0000 | No |
| 30905 | Gm45515 | 0.0000 | No |
| 30906 | Gm45516 | 0.0000 | No |
| 30907 | Gm45517 | 0.0000 | No |
| 30908 | Gm45518 | 0.0000 | No |
| 30909 | Gm45520 | 0.0000 | No |



|       |         |        |    |
|-------|---------|--------|----|
| 30910 | Gm45521 | 0.0000 | No |
| 30911 | Gm45522 | 0.0000 | No |
| 30912 | Gm45523 | 0.0000 | No |
| 30913 | Gm45525 | 0.0000 | No |
| 30914 | Gm45526 | 0.0000 | No |
| 30915 | Gm45527 | 0.0000 | No |
| 30916 | Gm45529 | 0.0000 | No |
| 30917 | Gm4553  | 0.0000 | No |
| 30918 | Gm45530 | 0.0000 | No |
| 30919 | Gm45532 | 0.0000 | No |
| 30920 | Gm45533 | 0.0000 | No |
| 30921 | Gm45534 | 0.0000 | No |
| 30922 | Gm45535 | 0.0000 | No |
| 30923 | Gm45536 | 0.0000 | No |
| 30924 | Gm45537 | 0.0000 | No |
| 30925 | Gm45538 | 0.0000 | No |
| 30926 | Gm45539 | 0.0000 | No |
| 30927 | Gm45540 | 0.0000 | No |
| 30928 | Gm45541 | 0.0000 | No |
| 30929 | Gm45542 | 0.0000 | No |
| 30930 | Gm45543 | 0.0000 | No |
| 30931 | Gm45544 | 0.0000 | No |
| 30932 | Gm45545 | 0.0000 | No |
| 30933 | Gm45546 | 0.0000 | No |
| 30934 | Gm45547 | 0.0000 | No |
| 30935 | Gm45548 | 0.0000 | No |
| 30936 | Gm45550 | 0.0000 | No |
| 30937 | Gm45551 | 0.0000 | No |
| 30938 | Gm45552 | 0.0000 | No |
| 30939 | Gm45553 | 0.0000 | No |
| 30940 | Gm45554 | 0.0000 | No |
| 30941 | Gm45555 | 0.0000 | No |
| 30942 | Gm45556 | 0.0000 | No |
| 30943 | Gm45557 | 0.0000 | No |
| 30944 | Gm45560 | 0.0000 | No |
| 30945 | Gm45561 | 0.0000 | No |
| 30946 | Gm45562 | 0.0000 | No |
| 30947 | Gm45564 | 0.0000 | No |
| 30948 | Gm45565 | 0.0000 | No |
| 30949 | Gm45567 | 0.0000 | No |
| 30950 | Gm45568 | 0.0000 | No |
| 30951 | Gm4557  | 0.0000 | No |
| 30952 | Gm45570 | 0.0000 | No |
| 30953 | Gm45571 | 0.0000 | No |
| 30954 | Gm45572 | 0.0000 | No |
| 30955 | Gm45573 | 0.0000 | No |

|       |         |        |    |
|-------|---------|--------|----|
| 30956 | Gm45574 | 0.0000 | No |
| 30957 | Gm45575 | 0.0000 | No |
| 30958 | Gm45576 | 0.0000 | No |
| 30959 | Gm45577 | 0.0000 | No |
| 30960 | Gm45579 | 0.0000 | No |
| 30961 | Gm4558  | 0.0000 | No |
| 30962 | Gm45580 | 0.0000 | No |
| 30963 | Gm45581 | 0.0000 | No |
| 30964 | Gm45582 | 0.0000 | No |
| 30965 | Gm45585 | 0.0000 | No |
| 30966 | Gm45586 | 0.0000 | No |
| 30967 | Gm45587 | 0.0000 | No |
| 30968 | Gm45588 | 0.0000 | No |
| 30969 | Gm45589 | 0.0000 | No |
| 30970 | Gm4559  | 0.0000 | No |
| 30971 | Gm45592 | 0.0000 | No |
| 30972 | Gm45593 | 0.0000 | No |
| 30973 | Gm45594 | 0.0000 | No |
| 30974 | Gm45595 | 0.0000 | No |
| 30975 | Gm45597 | 0.0000 | No |
| 30976 | Gm45598 | 0.0000 | No |
| 30977 | Gm45599 | 0.0000 | No |
| 30978 | Gm45600 | 0.0000 | No |
| 30979 | Gm45601 | 0.0000 | No |
| 30980 | Gm45603 | 0.0000 | No |
| 30981 | Gm45604 | 0.0000 | No |
| 30982 | Gm45605 | 0.0000 | No |
| 30983 | Gm45606 | 0.0000 | No |
| 30984 | Gm45607 | 0.0000 | No |
| 30985 | Gm45610 | 0.0000 | No |
| 30986 | Gm45611 | 0.0000 | No |
| 30987 | Gm45612 | 0.0000 | No |
| 30988 | Gm45613 | 0.0000 | No |
| 30989 | Gm45614 | 0.0000 | No |
| 30990 | Gm45615 | 0.0000 | No |
| 30991 | Gm45616 | 0.0000 | No |
| 30992 | Gm45617 | 0.0000 | No |
| 30993 | Gm45618 | 0.0000 | No |
| 30994 | Gm45619 | 0.0000 | No |
| 30995 | Gm45620 | 0.0000 | No |
| 30996 | Gm45621 | 0.0000 | No |
| 30997 | Gm45622 | 0.0000 | No |
| 30998 | Gm45623 | 0.0000 | No |
| 30999 | Gm45625 | 0.0000 | No |
| 31000 | Gm45628 | 0.0000 | No |
| 31001 | Gm45629 | 0.0000 | No |

|       |         |        |    |
|-------|---------|--------|----|
| 31002 | Gm45630 | 0.0000 | No |
| 31003 | Gm45631 | 0.0000 | No |
| 31004 | Gm45632 | 0.0000 | No |
| 31005 | Gm45633 | 0.0000 | No |
| 31006 | Gm45634 | 0.0000 | No |
| 31007 | Gm45635 | 0.0000 | No |
| 31008 | Gm45636 | 0.0000 | No |
| 31009 | Gm45637 | 0.0000 | No |
| 31010 | Gm45638 | 0.0000 | No |
| 31011 | Gm45640 | 0.0000 | No |
| 31012 | Gm45641 | 0.0000 | No |
| 31013 | Gm45642 | 0.0000 | No |
| 31014 | Gm45643 | 0.0000 | No |
| 31015 | Gm45644 | 0.0000 | No |
| 31016 | Gm45645 | 0.0000 | No |
| 31017 | Gm45646 | 0.0000 | No |
| 31018 | Gm45647 | 0.0000 | No |
| 31019 | Gm45648 | 0.0000 | No |
| 31020 | Gm45649 | 0.0000 | No |
| 31021 | Gm4565  | 0.0000 | No |
| 31022 | Gm45650 | 0.0000 | No |
| 31023 | Gm45651 | 0.0000 | No |
| 31024 | Gm45652 | 0.0000 | No |
| 31025 | Gm45655 | 0.0000 | No |
| 31026 | Gm45656 | 0.0000 | No |
| 31027 | Gm45658 | 0.0000 | No |
| 31028 | Gm45659 | 0.0000 | No |
| 31029 | Gm45660 | 0.0000 | No |
| 31030 | Gm45661 | 0.0000 | No |
| 31031 | Gm45662 | 0.0000 | No |
| 31032 | Gm45663 | 0.0000 | No |
| 31033 | Gm45664 | 0.0000 | No |
| 31034 | Gm45665 | 0.0000 | No |
| 31035 | Gm45666 | 0.0000 | No |
| 31036 | Gm45667 | 0.0000 | No |
| 31037 | Gm45668 | 0.0000 | No |
| 31038 | Gm45669 | 0.0000 | No |
| 31039 | Gm4567  | 0.0000 | No |
| 31040 | Gm45670 | 0.0000 | No |
| 31041 | Gm45671 | 0.0000 | No |
| 31042 | Gm45672 | 0.0000 | No |
| 31043 | Gm45673 | 0.0000 | No |
| 31044 | Gm45674 | 0.0000 | No |
| 31045 | Gm45675 | 0.0000 | No |
| 31046 | Gm45676 | 0.0000 | No |
| 31047 | Gm45678 | 0.0000 | No |

|       |         |        |    |
|-------|---------|--------|----|
| 31048 | Gm45679 | 0.0000 | No |
| 31049 | Gm45680 | 0.0000 | No |
| 31050 | Gm45681 | 0.0000 | No |
| 31051 | Gm45682 | 0.0000 | No |
| 31052 | Gm45683 | 0.0000 | No |
| 31053 | Gm45685 | 0.0000 | No |
| 31054 | Gm45686 | 0.0000 | No |
| 31055 | Gm45687 | 0.0000 | No |
| 31056 | Gm45688 | 0.0000 | No |
| 31057 | Gm45689 | 0.0000 | No |
| 31058 | Gm45690 | 0.0000 | No |
| 31059 | Gm4574  | 0.0000 | No |
| 31060 | Gm4575  | 0.0000 | No |
| 31061 | Gm4577  | 0.0000 | No |
| 31062 | Gm4585  | 0.0000 | No |
| 31063 | Gm4587  | 0.0000 | No |
| 31064 | Gm4596  | 0.0000 | No |
| 31065 | Gm4598  | 0.0000 | No |
| 31066 | Gm4602  | 0.0000 | No |
| 31067 | Gm4604  | 0.0000 | No |
| 31068 | Gm4607  | 0.0000 | No |
| 31069 | Gm4609  | 0.0000 | No |
| 31070 | Gm4613  | 0.0000 | No |
| 31071 | Gm4617  | 0.0000 | No |
| 31072 | Gm4631  | 0.0000 | No |
| 31073 | Gm4640  | 0.0000 | No |
| 31074 | Gm4651  | 0.0000 | No |
| 31075 | Gm4654  | 0.0000 | No |
| 31076 | Gm4660  | 0.0000 | No |
| 31077 | Gm4673  | 0.0000 | No |
| 31078 | Gm4675  | 0.0000 | No |
| 31079 | Gm4705  | 0.0000 | No |
| 31080 | Gm4707  | 0.0000 | No |
| 31081 | Gm4714  | 0.0000 | No |
| 31082 | Gm4724  | 0.0000 | No |
| 31083 | Gm4725  | 0.0000 | No |
| 31084 | Gm4726  | 0.0000 | No |
| 31085 | Gm4732  | 0.0000 | No |
| 31086 | Gm4734  | 0.0000 | No |
| 31087 | Gm4735  | 0.0000 | No |
| 31088 | Gm4736  | 0.0000 | No |
| 31089 | Gm4737  | 0.0000 | No |
| 31090 | Gm4742  | 0.0000 | No |
| 31091 | Gm4744  | 0.0000 | No |
| 31092 | Gm4750  | 0.0000 | No |
| 31093 | Gm4751  | 0.0000 | No |

|       |        |        |    |
|-------|--------|--------|----|
| 31094 | Gm4754 | 0.0000 | No |
| 31095 | Gm4756 | 0.0000 | No |
| 31096 | Gm4758 | 0.0000 | No |
| 31097 | Gm4759 | 0.0000 | No |
| 31098 | Gm4761 | 0.0000 | No |
| 31099 | Gm4763 | 0.0000 | No |
| 31100 | Gm4768 | 0.0000 | No |
| 31101 | Gm4773 | 0.0000 | No |
| 31102 | Gm4775 | 0.0000 | No |
| 31103 | Gm4778 | 0.0000 | No |
| 31104 | Gm4779 | 0.0000 | No |
| 31105 | Gm4781 | 0.0000 | No |
| 31106 | Gm4782 | 0.0000 | No |
| 31107 | Gm4784 | 0.0000 | No |
| 31108 | Gm4785 | 0.0000 | No |
| 31109 | Gm4787 | 0.0000 | No |
| 31110 | Gm4788 | 0.0000 | No |
| 31111 | Gm4789 | 0.0000 | No |
| 31112 | Gm4791 | 0.0000 | No |
| 31113 | Gm4793 | 0.0000 | No |
| 31114 | Gm4799 | 0.0000 | No |
| 31115 | Gm4804 | 0.0000 | No |
| 31116 | Gm4810 | 0.0000 | No |
| 31117 | Gm4812 | 0.0000 | No |
| 31118 | Gm4819 | 0.0000 | No |
| 31119 | Gm4822 | 0.0000 | No |
| 31120 | Gm4823 | 0.0000 | No |
| 31121 | Gm4825 | 0.0000 | No |
| 31122 | Gm4831 | 0.0000 | No |
| 31123 | Gm4832 | 0.0000 | No |
| 31124 | Gm4835 | 0.0000 | No |
| 31125 | Gm4836 | 0.0000 | No |
| 31126 | Gm4842 | 0.0000 | No |
| 31127 | Gm4849 | 0.0000 | No |
| 31128 | Gm4850 | 0.0000 | No |
| 31129 | Gm4853 | 0.0000 | No |
| 31130 | Gm4854 | 0.0000 | No |
| 31131 | Gm4855 | 0.0000 | No |
| 31132 | Gm4856 | 0.0000 | No |
| 31133 | Gm4857 | 0.0000 | No |
| 31134 | Gm4858 | 0.0000 | No |
| 31135 | Gm4859 | 0.0000 | No |
| 31136 | Gm4860 | 0.0000 | No |
| 31137 | Gm4861 | 0.0000 | No |
| 31138 | Gm4863 | 0.0000 | No |
| 31139 | Gm4865 | 0.0000 | No |

|       |        |        |    |
|-------|--------|--------|----|
| 31140 | Gm4866 | 0.0000 | No |
| 31141 | Gm4868 | 0.0000 | No |
| 31142 | Gm4869 | 0.0000 | No |
| 31143 | Gm4870 | 0.0000 | No |
| 31144 | Gm4871 | 0.0000 | No |
| 31145 | Gm4873 | 0.0000 | No |
| 31146 | Gm4874 | 0.0000 | No |
| 31147 | Gm4875 | 0.0000 | No |
| 31148 | Gm4876 | 0.0000 | No |
| 31149 | Gm4877 | 0.0000 | No |
| 31150 | Gm4879 | 0.0000 | No |
| 31151 | Gm4880 | 0.0000 | No |
| 31152 | Gm4881 | 0.0000 | No |
| 31153 | Gm4883 | 0.0000 | No |
| 31154 | Gm4884 | 0.0000 | No |
| 31155 | Gm4886 | 0.0000 | No |
| 31156 | Gm4887 | 0.0000 | No |
| 31157 | Gm4889 | 0.0000 | No |
| 31158 | Gm4890 | 0.0000 | No |
| 31159 | Gm4891 | 0.0000 | No |
| 31160 | Gm4894 | 0.0000 | No |
| 31161 | Gm4895 | 0.0000 | No |
| 31162 | Gm4899 | 0.0000 | No |
| 31163 | Gm4903 | 0.0000 | No |
| 31164 | Gm4904 | 0.0000 | No |
| 31165 | Gm4907 | 0.0000 | No |
| 31166 | Gm4908 | 0.0000 | No |
| 31167 | Gm4909 | 0.0000 | No |
| 31168 | Gm4910 | 0.0000 | No |
| 31169 | Gm4911 | 0.0000 | No |
| 31170 | Gm4912 | 0.0000 | No |
| 31171 | Gm4913 | 0.0000 | No |
| 31172 | Gm4914 | 0.0000 | No |
| 31173 | Gm4915 | 0.0000 | No |
| 31174 | Gm4916 | 0.0000 | No |
| 31175 | Gm4917 | 0.0000 | No |
| 31176 | Gm4918 | 0.0000 | No |
| 31177 | Gm4919 | 0.0000 | No |
| 31178 | Gm4922 | 0.0000 | No |
| 31179 | Gm4924 | 0.0000 | No |
| 31180 | Gm4925 | 0.0000 | No |
| 31181 | Gm4929 | 0.0000 | No |
| 31182 | Gm4938 | 0.0000 | No |
| 31183 | Gm4943 | 0.0000 | No |
| 31184 | Gm4945 | 0.0000 | No |
| 31185 | Gm4950 | 0.0000 | No |

|       |        |        |    |
|-------|--------|--------|----|
| 31186 | Gm4951 | 0.0000 | No |
| 31187 | Gm4952 | 0.0000 | No |
| 31188 | Gm4953 | 0.0000 | No |
| 31189 | Gm4959 | 0.0000 | No |
| 31190 | Gm4960 | 0.0000 | No |
| 31191 | Gm4961 | 0.0000 | No |
| 31192 | Gm4962 | 0.0000 | No |
| 31193 | Gm4963 | 0.0000 | No |
| 31194 | Gm4968 | 0.0000 | No |
| 31195 | Gm4969 | 0.0000 | No |
| 31196 | Gm4971 | 0.0000 | No |
| 31197 | Gm4972 | 0.0000 | No |
| 31198 | Gm4973 | 0.0000 | No |
| 31199 | Gm4974 | 0.0000 | No |
| 31200 | Gm4978 | 0.0000 | No |
| 31201 | Gm498  | 0.0000 | No |
| 31202 | Gm4981 | 0.0000 | No |
| 31203 | Gm4982 | 0.0000 | No |
| 31204 | Gm4984 | 0.0000 | No |
| 31205 | Gm4985 | 0.0000 | No |
| 31206 | Gm4986 | 0.0000 | No |
| 31207 | Gm4987 | 0.0000 | No |
| 31208 | Gm4991 | 0.0000 | No |
| 31209 | Gm4992 | 0.0000 | No |
| 31210 | Gm4993 | 0.0000 | No |
| 31211 | Gm4994 | 0.0000 | No |
| 31212 | Gm4995 | 0.0000 | No |
| 31213 | Gm4996 | 0.0000 | No |
| 31214 | Gm4997 | 0.0000 | No |
| 31215 | Gm5    | 0.0000 | No |
| 31216 | Gm5034 | 0.0000 | No |
| 31217 | Gm5037 | 0.0000 | No |
| 31218 | Gm5043 | 0.0000 | No |
| 31219 | Gm5046 | 0.0000 | No |
| 31220 | Gm5050 | 0.0000 | No |
| 31221 | Gm5051 | 0.0000 | No |
| 31222 | Gm5053 | 0.0000 | No |
| 31223 | Gm5054 | 0.0000 | No |
| 31224 | Gm5058 | 0.0000 | No |
| 31225 | Gm5060 | 0.0000 | No |
| 31226 | Gm5065 | 0.0000 | No |
| 31227 | Gm5066 | 0.0000 | No |
| 31228 | Gm5067 | 0.0000 | No |
| 31229 | Gm5069 | 0.0000 | No |
| 31230 | Gm5070 | 0.0000 | No |
| 31231 | Gm5071 | 0.0000 | No |

|       |        |        |    |
|-------|--------|--------|----|
| 31232 | Gm5072 | 0.0000 | No |
| 31233 | Gm5073 | 0.0000 | No |
| 31234 | Gm5075 | 0.0000 | No |
| 31235 | Gm5082 | 0.0000 | No |
| 31236 | Gm5083 | 0.0000 | No |
| 31237 | Gm5084 | 0.0000 | No |
| 31238 | Gm5086 | 0.0000 | No |
| 31239 | Gm5087 | 0.0000 | No |
| 31240 | Gm5091 | 0.0000 | No |
| 31241 | Gm5092 | 0.0000 | No |
| 31242 | Gm5093 | 0.0000 | No |
| 31243 | Gm5096 | 0.0000 | No |
| 31244 | Gm5099 | 0.0000 | No |
| 31245 | Gm5100 | 0.0000 | No |
| 31246 | Gm5103 | 0.0000 | No |
| 31247 | Gm5105 | 0.0000 | No |
| 31248 | Gm5106 | 0.0000 | No |
| 31249 | Gm5108 | 0.0000 | No |
| 31250 | Gm5112 | 0.0000 | No |
| 31251 | Gm5113 | 0.0000 | No |
| 31252 | Gm5116 | 0.0000 | No |
| 31253 | Gm5117 | 0.0000 | No |
| 31254 | Gm5118 | 0.0000 | No |
| 31255 | Gm5121 | 0.0000 | No |
| 31256 | Gm5123 | 0.0000 | No |
| 31257 | Gm5124 | 0.0000 | No |
| 31258 | Gm5125 | 0.0000 | No |
| 31259 | Gm5128 | 0.0000 | No |
| 31260 | Gm5129 | 0.0000 | No |
| 31261 | Gm5130 | 0.0000 | No |
| 31262 | Gm5133 | 0.0000 | No |
| 31263 | Gm5134 | 0.0000 | No |
| 31264 | Gm5135 | 0.0000 | No |
| 31265 | Gm5138 | 0.0000 | No |
| 31266 | Gm5139 | 0.0000 | No |
| 31267 | Gm5141 | 0.0000 | No |
| 31268 | Gm5142 | 0.0000 | No |
| 31269 | Gm5145 | 0.0000 | No |
| 31270 | Gm5147 | 0.0000 | No |
| 31271 | Gm5148 | 0.0000 | No |
| 31272 | Gm5152 | 0.0000 | No |
| 31273 | Gm5154 | 0.0000 | No |
| 31274 | Gm5155 | 0.0000 | No |
| 31275 | Gm5157 | 0.0000 | No |
| 31276 | Gm5160 | 0.0000 | No |
| 31277 | Gm5161 | 0.0000 | No |



|       |        |        |    |
|-------|--------|--------|----|
| 31278 | Gm5166 | 0.0000 | No |
| 31279 | Gm5168 | 0.0000 | No |
| 31280 | Gm5169 | 0.0000 | No |
| 31281 | Gm5174 | 0.0000 | No |
| 31282 | Gm5177 | 0.0000 | No |
| 31283 | Gm5187 | 0.0000 | No |
| 31284 | Gm5190 | 0.0000 | No |
| 31285 | Gm5205 | 0.0000 | No |
| 31286 | Gm5210 | 0.0000 | No |
| 31287 | Gm5215 | 0.0000 | No |
| 31288 | Gm5218 | 0.0000 | No |
| 31289 | Gm5224 | 0.0000 | No |
| 31290 | Gm5225 | 0.0000 | No |
| 31291 | Gm5228 | 0.0000 | No |
| 31292 | Gm5229 | 0.0000 | No |
| 31293 | Gm5239 | 0.0000 | No |
| 31294 | Gm5244 | 0.0000 | No |
| 31295 | Gm5248 | 0.0000 | No |
| 31296 | Gm525  | 0.0000 | No |
| 31297 | Gm5250 | 0.0000 | No |
| 31298 | Gm5253 | 0.0000 | No |
| 31299 | Gm5254 | 0.0000 | No |
| 31300 | Gm5255 | 0.0000 | No |
| 31301 | Gm5256 | 0.0000 | No |
| 31302 | Gm5257 | 0.0000 | No |
| 31303 | Gm5258 | 0.0000 | No |
| 31304 | Gm5259 | 0.0000 | No |
| 31305 | Gm5260 | 0.0000 | No |
| 31306 | Gm5261 | 0.0000 | No |
| 31307 | Gm5262 | 0.0000 | No |
| 31308 | Gm5263 | 0.0000 | No |
| 31309 | Gm5264 | 0.0000 | No |
| 31310 | Gm5265 | 0.0000 | No |
| 31311 | Gm5266 | 0.0000 | No |
| 31312 | Gm5267 | 0.0000 | No |
| 31313 | Gm5269 | 0.0000 | No |
| 31314 | Gm527  | 0.0000 | No |
| 31315 | Gm5270 | 0.0000 | No |
| 31316 | Gm5272 | 0.0000 | No |
| 31317 | Gm5274 | 0.0000 | No |
| 31318 | Gm5276 | 0.0000 | No |
| 31319 | Gm5277 | 0.0000 | No |
| 31320 | Gm5278 | 0.0000 | No |
| 31321 | Gm5279 | 0.0000 | No |
| 31322 | Gm5281 | 0.0000 | No |
| 31323 | Gm5283 | 0.0000 | No |

|       |        |        |    |
|-------|--------|--------|----|
| 31324 | Gm5284 | 0.0000 | No |
| 31325 | Gm5285 | 0.0000 | No |
| 31326 | Gm5286 | 0.0000 | No |
| 31327 | Gm5287 | 0.0000 | No |
| 31328 | Gm5288 | 0.0000 | No |
| 31329 | Gm5291 | 0.0000 | No |
| 31330 | Gm5292 | 0.0000 | No |
| 31331 | Gm5294 | 0.0000 | No |
| 31332 | Gm5297 | 0.0000 | No |
| 31333 | Gm5298 | 0.0000 | No |
| 31334 | Gm53   | 0.0000 | No |
| 31335 | Gm5300 | 0.0000 | No |
| 31336 | Gm5302 | 0.0000 | No |
| 31337 | Gm5303 | 0.0000 | No |
| 31338 | Gm5306 | 0.0000 | No |
| 31339 | Gm5308 | 0.0000 | No |
| 31340 | Gm5309 | 0.0000 | No |
| 31341 | Gm5310 | 0.0000 | No |
| 31342 | Gm5311 | 0.0000 | No |
| 31343 | Gm5312 | 0.0000 | No |
| 31344 | Gm5313 | 0.0000 | No |
| 31345 | Gm5314 | 0.0000 | No |
| 31346 | Gm5315 | 0.0000 | No |
| 31347 | Gm5316 | 0.0000 | No |
| 31348 | Gm5317 | 0.0000 | No |
| 31349 | Gm5318 | 0.0000 | No |
| 31350 | Gm5319 | 0.0000 | No |
| 31351 | Gm5321 | 0.0000 | No |
| 31352 | Gm5322 | 0.0000 | No |
| 31353 | Gm5324 | 0.0000 | No |
| 31354 | Gm5327 | 0.0000 | No |
| 31355 | Gm5329 | 0.0000 | No |
| 31356 | Gm5335 | 0.0000 | No |
| 31357 | Gm5338 | 0.0000 | No |
| 31358 | Gm5340 | 0.0000 | No |
| 31359 | Gm5341 | 0.0000 | No |
| 31360 | Gm5342 | 0.0000 | No |
| 31361 | Gm5345 | 0.0000 | No |
| 31362 | Gm5353 | 0.0000 | No |
| 31363 | Gm5354 | 0.0000 | No |
| 31364 | Gm5356 | 0.0000 | No |
| 31365 | Gm5361 | 0.0000 | No |
| 31366 | Gm5368 | 0.0000 | No |
| 31367 | Gm5370 | 0.0000 | No |
| 31368 | Gm5371 | 0.0000 | No |
| 31369 | Gm5372 | 0.0000 | No |

|       |        |        |    |
|-------|--------|--------|----|
| 31370 | Gm5379 | 0.0000 | No |
| 31371 | Gm5380 | 0.0000 | No |
| 31372 | Gm5383 | 0.0000 | No |
| 31373 | Gm5384 | 0.0000 | No |
| 31374 | Gm5385 | 0.0000 | No |
| 31375 | Gm5386 | 0.0000 | No |
| 31376 | Gm5387 | 0.0000 | No |
| 31377 | Gm5388 | 0.0000 | No |
| 31378 | Gm5389 | 0.0000 | No |
| 31379 | Gm5391 | 0.0000 | No |
| 31380 | Gm5392 | 0.0000 | No |
| 31381 | Gm5393 | 0.0000 | No |
| 31382 | Gm5394 | 0.0000 | No |
| 31383 | Gm5395 | 0.0000 | No |
| 31384 | Gm5396 | 0.0000 | No |
| 31385 | Gm5397 | 0.0000 | No |
| 31386 | Gm5398 | 0.0000 | No |
| 31387 | Gm5401 | 0.0000 | No |
| 31388 | Gm5402 | 0.0000 | No |
| 31389 | Gm5403 | 0.0000 | No |
| 31390 | Gm5405 | 0.0000 | No |
| 31391 | Gm5406 | 0.0000 | No |
| 31392 | Gm5408 | 0.0000 | No |
| 31393 | Gm5414 | 0.0000 | No |
| 31394 | Gm5416 | 0.0000 | No |
| 31395 | Gm5417 | 0.0000 | No |
| 31396 | Gm5418 | 0.0000 | No |
| 31397 | Gm5419 | 0.0000 | No |
| 31398 | Gm5421 | 0.0000 | No |
| 31399 | Gm5422 | 0.0000 | No |
| 31400 | Gm5426 | 0.0000 | No |
| 31401 | Gm5430 | 0.0000 | No |
| 31402 | Gm5431 | 0.0000 | No |
| 31403 | Gm5432 | 0.0000 | No |
| 31404 | Gm5434 | 0.0000 | No |
| 31405 | Gm5435 | 0.0000 | No |
| 31406 | Gm5436 | 0.0000 | No |
| 31407 | Gm5441 | 0.0000 | No |
| 31408 | Gm5442 | 0.0000 | No |
| 31409 | Gm5445 | 0.0000 | No |
| 31410 | Gm5446 | 0.0000 | No |
| 31411 | Gm5449 | 0.0000 | No |
| 31412 | Gm5451 | 0.0000 | No |
| 31413 | Gm5453 | 0.0000 | No |
| 31414 | Gm5454 | 0.0000 | No |
| 31415 | Gm5456 | 0.0000 | No |

|       |        |        |    |
|-------|--------|--------|----|
| 31416 | Gm5457 | 0.0000 | No |
| 31417 | Gm5458 | 0.0000 | No |
| 31418 | Gm5459 | 0.0000 | No |
| 31419 | Gm5460 | 0.0000 | No |
| 31420 | Gm5464 | 0.0000 | No |
| 31421 | Gm5466 | 0.0000 | No |
| 31422 | Gm5471 | 0.0000 | No |
| 31423 | Gm5472 | 0.0000 | No |
| 31424 | Gm5473 | 0.0000 | No |
| 31425 | Gm5475 | 0.0000 | No |
| 31426 | Gm5478 | 0.0000 | No |
| 31427 | Gm5479 | 0.0000 | No |
| 31428 | Gm5483 | 0.0000 | No |
| 31429 | Gm5493 | 0.0000 | No |
| 31430 | Gm5499 | 0.0000 | No |
| 31431 | Gm5501 | 0.0000 | No |
| 31432 | Gm5507 | 0.0000 | No |
| 31433 | Gm5510 | 0.0000 | No |
| 31434 | Gm5511 | 0.0000 | No |
| 31435 | Gm5513 | 0.0000 | No |
| 31436 | Gm5514 | 0.0000 | No |
| 31437 | Gm5518 | 0.0000 | No |
| 31438 | Gm5519 | 0.0000 | No |
| 31439 | Gm5522 | 0.0000 | No |
| 31440 | Gm5523 | 0.0000 | No |
| 31441 | Gm5524 | 0.0000 | No |
| 31442 | Gm5525 | 0.0000 | No |
| 31443 | Gm5526 | 0.0000 | No |
| 31444 | Gm5527 | 0.0000 | No |
| 31445 | Gm5528 | 0.0000 | No |
| 31446 | Gm5529 | 0.0000 | No |
| 31447 | Gm553  | 0.0000 | No |
| 31448 | Gm5530 | 0.0000 | No |
| 31449 | Gm5532 | 0.0000 | No |
| 31450 | Gm5533 | 0.0000 | No |
| 31451 | Gm5535 | 0.0000 | No |
| 31452 | Gm5537 | 0.0000 | No |
| 31453 | Gm5538 | 0.0000 | No |
| 31454 | Gm5539 | 0.0000 | No |
| 31455 | Gm5540 | 0.0000 | No |
| 31456 | Gm5541 | 0.0000 | No |
| 31457 | Gm5542 | 0.0000 | No |
| 31458 | Gm5543 | 0.0000 | No |
| 31459 | Gm5544 | 0.0000 | No |
| 31460 | Gm5546 | 0.0000 | No |
| 31461 | Gm5547 | 0.0000 | No |

|       |        |        |    |
|-------|--------|--------|----|
| 31462 | Gm5550 | 0.0000 | No |
| 31463 | Gm5551 | 0.0000 | No |
| 31464 | Gm5552 | 0.0000 | No |
| 31465 | Gm5554 | 0.0000 | No |
| 31466 | Gm5555 | 0.0000 | No |
| 31467 | Gm5558 | 0.0000 | No |
| 31468 | Gm5559 | 0.0000 | No |
| 31469 | Gm5560 | 0.0000 | No |
| 31470 | Gm5561 | 0.0000 | No |
| 31471 | Gm5564 | 0.0000 | No |
| 31472 | Gm5565 | 0.0000 | No |
| 31473 | Gm5566 | 0.0000 | No |
| 31474 | Gm5570 | 0.0000 | No |
| 31475 | Gm5575 | 0.0000 | No |
| 31476 | Gm5576 | 0.0000 | No |
| 31477 | Gm5577 | 0.0000 | No |
| 31478 | Gm5578 | 0.0000 | No |
| 31479 | Gm5580 | 0.0000 | No |
| 31480 | Gm5581 | 0.0000 | No |
| 31481 | Gm5582 | 0.0000 | No |
| 31482 | Gm5583 | 0.0000 | No |
| 31483 | Gm5586 | 0.0000 | No |
| 31484 | Gm5590 | 0.0000 | No |
| 31485 | Gm5591 | 0.0000 | No |
| 31486 | Gm5593 | 0.0000 | No |
| 31487 | Gm5594 | 0.0000 | No |
| 31488 | Gm5596 | 0.0000 | No |
| 31489 | Gm5599 | 0.0000 | No |
| 31490 | Gm5601 | 0.0000 | No |
| 31491 | Gm5602 | 0.0000 | No |
| 31492 | Gm5605 | 0.0000 | No |
| 31493 | Gm5607 | 0.0000 | No |
| 31494 | Gm5608 | 0.0000 | No |
| 31495 | Gm5609 | 0.0000 | No |
| 31496 | Gm561  | 0.0000 | No |
| 31497 | Gm5611 | 0.0000 | No |
| 31498 | Gm5612 | 0.0000 | No |
| 31499 | Gm5614 | 0.0000 | No |
| 31500 | Gm5617 | 0.0000 | No |
| 31501 | Gm5620 | 0.0000 | No |
| 31502 | Gm5621 | 0.0000 | No |
| 31503 | Gm5622 | 0.0000 | No |
| 31504 | Gm5624 | 0.0000 | No |
| 31505 | Gm5627 | 0.0000 | No |
| 31506 | Gm5637 | 0.0000 | No |
| 31507 | Gm5638 | 0.0000 | No |

|       |        |        |    |
|-------|--------|--------|----|
| 31508 | Gm5639 | 0.0000 | No |
| 31509 | Gm5640 | 0.0000 | No |
| 31510 | Gm5641 | 0.0000 | No |
| 31511 | Gm5643 | 0.0000 | No |
| 31512 | Gm5644 | 0.0000 | No |
| 31513 | Gm5645 | 0.0000 | No |
| 31514 | Gm5648 | 0.0000 | No |
| 31515 | Gm5652 | 0.0000 | No |
| 31516 | Gm5656 | 0.0000 | No |
| 31517 | Gm5660 | 0.0000 | No |
| 31518 | Gm5662 | 0.0000 | No |
| 31519 | Gm5670 | 0.0000 | No |
| 31520 | Gm5678 | 0.0000 | No |
| 31521 | Gm568  | 0.0000 | No |
| 31522 | Gm5684 | 0.0000 | No |
| 31523 | Gm5687 | 0.0000 | No |
| 31524 | Gm5689 | 0.0000 | No |
| 31525 | Gm5694 | 0.0000 | No |
| 31526 | Gm5696 | 0.0000 | No |
| 31527 | Gm5697 | 0.0000 | No |
| 31528 | Gm5698 | 0.0000 | No |
| 31529 | Gm5699 | 0.0000 | No |
| 31530 | Gm5700 | 0.0000 | No |
| 31531 | Gm5702 | 0.0000 | No |
| 31532 | Gm5703 | 0.0000 | No |
| 31533 | Gm5705 | 0.0000 | No |
| 31534 | Gm5706 | 0.0000 | No |
| 31535 | Gm5708 | 0.0000 | No |
| 31536 | Gm5709 | 0.0000 | No |
| 31537 | Gm5710 | 0.0000 | No |
| 31538 | Gm5711 | 0.0000 | No |
| 31539 | Gm5712 | 0.0000 | No |
| 31540 | Gm5714 | 0.0000 | No |
| 31541 | Gm5715 | 0.0000 | No |
| 31542 | Gm572  | 0.0000 | No |
| 31543 | Gm5721 | 0.0000 | No |
| 31544 | Gm5723 | 0.0000 | No |
| 31545 | Gm5724 | 0.0000 | No |
| 31546 | Gm5725 | 0.0000 | No |
| 31547 | Gm5726 | 0.0000 | No |
| 31548 | Gm5728 | 0.0000 | No |
| 31549 | Gm5731 | 0.0000 | No |
| 31550 | Gm5732 | 0.0000 | No |
| 31551 | Gm5734 | 0.0000 | No |
| 31552 | Gm5735 | 0.0000 | No |
| 31553 | Gm5737 | 0.0000 | No |

|       |        |        |    |
|-------|--------|--------|----|
| 31554 | Gm5738 | 0.0000 | No |
| 31555 | Gm5740 | 0.0000 | No |
| 31556 | Gm5741 | 0.0000 | No |
| 31557 | Gm5745 | 0.0000 | No |
| 31558 | Gm5746 | 0.0000 | No |
| 31559 | Gm5751 | 0.0000 | No |
| 31560 | Gm5752 | 0.0000 | No |
| 31561 | Gm5754 | 0.0000 | No |
| 31562 | Gm5755 | 0.0000 | No |
| 31563 | Gm5757 | 0.0000 | No |
| 31564 | Gm5759 | 0.0000 | No |
| 31565 | Gm5760 | 0.0000 | No |
| 31566 | Gm5761 | 0.0000 | No |
| 31567 | Gm5762 | 0.0000 | No |
| 31568 | Gm5763 | 0.0000 | No |
| 31569 | Gm5764 | 0.0000 | No |
| 31570 | Gm5766 | 0.0000 | No |
| 31571 | Gm5773 | 0.0000 | No |
| 31572 | Gm5776 | 0.0000 | No |
| 31573 | Gm5777 | 0.0000 | No |
| 31574 | Gm5778 | 0.0000 | No |
| 31575 | Gm5784 | 0.0000 | No |
| 31576 | Gm5786 | 0.0000 | No |
| 31577 | Gm5787 | 0.0000 | No |
| 31578 | Gm5796 | 0.0000 | No |
| 31579 | Gm5797 | 0.0000 | No |
| 31580 | Gm5798 | 0.0000 | No |
| 31581 | Gm5800 | 0.0000 | No |
| 31582 | Gm5801 | 0.0000 | No |
| 31583 | Gm5803 | 0.0000 | No |
| 31584 | Gm5805 | 0.0000 | No |
| 31585 | Gm5808 | 0.0000 | No |
| 31586 | Gm5812 | 0.0000 | No |
| 31587 | Gm5814 | 0.0000 | No |
| 31588 | Gm5815 | 0.0000 | No |
| 31589 | Gm5819 | 0.0000 | No |
| 31590 | Gm5822 | 0.0000 | No |
| 31591 | Gm5828 | 0.0000 | No |
| 31592 | Gm5829 | 0.0000 | No |
| 31593 | Gm5830 | 0.0000 | No |
| 31594 | Gm5832 | 0.0000 | No |
| 31595 | Gm5833 | 0.0000 | No |
| 31596 | Gm5834 | 0.0000 | No |
| 31597 | Gm5835 | 0.0000 | No |
| 31598 | Gm5837 | 0.0000 | No |
| 31599 | Gm5839 | 0.0000 | No |

|       |        |        |    |
|-------|--------|--------|----|
| 31600 | Gm5841 | 0.0000 | No |
| 31601 | Gm5842 | 0.0000 | No |
| 31602 | Gm5843 | 0.0000 | No |
| 31603 | Gm5844 | 0.0000 | No |
| 31604 | Gm5845 | 0.0000 | No |
| 31605 | Gm5846 | 0.0000 | No |
| 31606 | Gm5849 | 0.0000 | No |
| 31607 | Gm5850 | 0.0000 | No |
| 31608 | Gm5851 | 0.0000 | No |
| 31609 | Gm5852 | 0.0000 | No |
| 31610 | Gm5853 | 0.0000 | No |
| 31611 | Gm5855 | 0.0000 | No |
| 31612 | Gm5857 | 0.0000 | No |
| 31613 | Gm5859 | 0.0000 | No |
| 31614 | Gm5860 | 0.0000 | No |
| 31615 | Gm5861 | 0.0000 | No |
| 31616 | Gm5862 | 0.0000 | No |
| 31617 | Gm5863 | 0.0000 | No |
| 31618 | Gm5864 | 0.0000 | No |
| 31619 | Gm5865 | 0.0000 | No |
| 31620 | Gm5866 | 0.0000 | No |
| 31621 | Gm5867 | 0.0000 | No |
| 31622 | Gm5868 | 0.0000 | No |
| 31623 | Gm5869 | 0.0000 | No |
| 31624 | Gm5870 | 0.0000 | No |
| 31625 | Gm5871 | 0.0000 | No |
| 31626 | Gm5873 | 0.0000 | No |
| 31627 | Gm5874 | 0.0000 | No |
| 31628 | Gm5876 | 0.0000 | No |
| 31629 | Gm5878 | 0.0000 | No |
| 31630 | Gm5879 | 0.0000 | No |
| 31631 | Gm5881 | 0.0000 | No |
| 31632 | Gm5883 | 0.0000 | No |
| 31633 | Gm5884 | 0.0000 | No |
| 31634 | Gm5885 | 0.0000 | No |
| 31635 | Gm5890 | 0.0000 | No |
| 31636 | Gm5891 | 0.0000 | No |
| 31637 | Gm5893 | 0.0000 | No |
| 31638 | Gm5896 | 0.0000 | No |
| 31639 | Gm5898 | 0.0000 | No |
| 31640 | Gm5899 | 0.0000 | No |
| 31641 | Gm5900 | 0.0000 | No |
| 31642 | Gm5901 | 0.0000 | No |
| 31643 | Gm5903 | 0.0000 | No |
| 31644 | Gm5904 | 0.0000 | No |
| 31645 | Gm5905 | 0.0000 | No |



|       |        |        |    |
|-------|--------|--------|----|
| 31646 | Gm5909 | 0.0000 | No |
| 31647 | Gm5912 | 0.0000 | No |
| 31648 | Gm5913 | 0.0000 | No |
| 31649 | Gm5914 | 0.0000 | No |
| 31650 | Gm5915 | 0.0000 | No |
| 31651 | Gm5920 | 0.0000 | No |
| 31652 | Gm5921 | 0.0000 | No |
| 31653 | Gm5924 | 0.0000 | No |
| 31654 | Gm5925 | 0.0000 | No |
| 31655 | Gm5926 | 0.0000 | No |
| 31656 | Gm5929 | 0.0000 | No |
| 31657 | Gm5930 | 0.0000 | No |
| 31658 | Gm5931 | 0.0000 | No |
| 31659 | Gm5934 | 0.0000 | No |
| 31660 | Gm5935 | 0.0000 | No |
| 31661 | Gm5936 | 0.0000 | No |
| 31662 | Gm5937 | 0.0000 | No |
| 31663 | Gm5938 | 0.0000 | No |
| 31664 | Gm5939 | 0.0000 | No |
| 31665 | Gm5940 | 0.0000 | No |
| 31666 | Gm5941 | 0.0000 | No |
| 31667 | Gm5942 | 0.0000 | No |
| 31668 | Gm5943 | 0.0000 | No |
| 31669 | Gm5944 | 0.0000 | No |
| 31670 | Gm5946 | 0.0000 | No |
| 31671 | Gm5947 | 0.0000 | No |
| 31672 | Gm595  | 0.0000 | No |
| 31673 | Gm5958 | 0.0000 | No |
| 31674 | Gm5963 | 0.0000 | No |
| 31675 | Gm5965 | 0.0000 | No |
| 31676 | Gm5967 | 0.0000 | No |
| 31677 | Gm597  | 0.0000 | No |
| 31678 | Gm5970 | 0.0000 | No |
| 31679 | Gm5973 | 0.0000 | No |
| 31680 | Gm5974 | 0.0000 | No |
| 31681 | Gm5975 | 0.0000 | No |
| 31682 | Gm5976 | 0.0000 | No |
| 31683 | Gm5977 | 0.0000 | No |
| 31684 | Gm5979 | 0.0000 | No |
| 31685 | Gm5981 | 0.0000 | No |
| 31686 | Gm5982 | 0.0000 | No |
| 31687 | Gm5983 | 0.0000 | No |
| 31688 | Gm5987 | 0.0000 | No |
| 31689 | Gm5989 | 0.0000 | No |
| 31690 | Gm5990 | 0.0000 | No |
| 31691 | Gm5995 | 0.0000 | No |

|       |        |        |    |
|-------|--------|--------|----|
| 31692 | Gm5996 | 0.0000 | No |
| 31693 | Gm5997 | 0.0000 | No |
| 31694 | Gm6003 | 0.0000 | No |
| 31695 | Gm6004 | 0.0000 | No |
| 31696 | Gm6008 | 0.0000 | No |
| 31697 | Gm6009 | 0.0000 | No |
| 31698 | Gm6011 | 0.0000 | No |
| 31699 | Gm6012 | 0.0000 | No |
| 31700 | Gm6019 | 0.0000 | No |
| 31701 | Gm6020 | 0.0000 | No |
| 31702 | Gm6023 | 0.0000 | No |
| 31703 | Gm6025 | 0.0000 | No |
| 31704 | Gm6027 | 0.0000 | No |
| 31705 | Gm6028 | 0.0000 | No |
| 31706 | Gm6030 | 0.0000 | No |
| 31707 | Gm6031 | 0.0000 | No |
| 31708 | Gm6034 | 0.0000 | No |
| 31709 | Gm6038 | 0.0000 | No |
| 31710 | Gm6039 | 0.0000 | No |
| 31711 | Gm6040 | 0.0000 | No |
| 31712 | Gm6043 | 0.0000 | No |
| 31713 | Gm6044 | 0.0000 | No |
| 31714 | Gm6051 | 0.0000 | No |
| 31715 | Gm6054 | 0.0000 | No |
| 31716 | Gm6055 | 0.0000 | No |
| 31717 | Gm6057 | 0.0000 | No |
| 31718 | Gm6058 | 0.0000 | No |
| 31719 | Gm6059 | 0.0000 | No |
| 31720 | Gm6060 | 0.0000 | No |
| 31721 | Gm6061 | 0.0000 | No |
| 31722 | Gm6062 | 0.0000 | No |
| 31723 | Gm6063 | 0.0000 | No |
| 31724 | Gm6064 | 0.0000 | No |
| 31725 | Gm6065 | 0.0000 | No |
| 31726 | Gm6067 | 0.0000 | No |
| 31727 | Gm6069 | 0.0000 | No |
| 31728 | Gm6070 | 0.0000 | No |
| 31729 | Gm6071 | 0.0000 | No |
| 31730 | Gm6072 | 0.0000 | No |
| 31731 | Gm6073 | 0.0000 | No |
| 31732 | Gm6074 | 0.0000 | No |
| 31733 | Gm6075 | 0.0000 | No |
| 31734 | Gm6079 | 0.0000 | No |
| 31735 | Gm6083 | 0.0000 | No |
| 31736 | Gm6085 | 0.0000 | No |
| 31737 | Gm6086 | 0.0000 | No |

|       |        |        |    |
|-------|--------|--------|----|
| 31738 | Gm6088 | 0.0000 | No |
| 31739 | Gm6089 | 0.0000 | No |
| 31740 | Gm609  | 0.0000 | No |
| 31741 | Gm6092 | 0.0000 | No |
| 31742 | Gm6098 | 0.0000 | No |
| 31743 | Gm6100 | 0.0000 | No |
| 31744 | Gm6101 | 0.0000 | No |
| 31745 | Gm6104 | 0.0000 | No |
| 31746 | Gm6105 | 0.0000 | No |
| 31747 | Gm6108 | 0.0000 | No |
| 31748 | Gm6113 | 0.0000 | No |
| 31749 | Gm6114 | 0.0000 | No |
| 31750 | Gm6116 | 0.0000 | No |
| 31751 | Gm6117 | 0.0000 | No |
| 31752 | Gm6119 | 0.0000 | No |
| 31753 | Gm6121 | 0.0000 | No |
| 31754 | Gm6123 | 0.0000 | No |
| 31755 | Gm6133 | 0.0000 | No |
| 31756 | Gm6135 | 0.0000 | No |
| 31757 | Gm6136 | 0.0000 | No |
| 31758 | Gm6137 | 0.0000 | No |
| 31759 | Gm6139 | 0.0000 | No |
| 31760 | Gm614  | 0.0000 | No |
| 31761 | Gm6140 | 0.0000 | No |
| 31762 | Gm6142 | 0.0000 | No |
| 31763 | Gm6152 | 0.0000 | No |
| 31764 | Gm6153 | 0.0000 | No |
| 31765 | Gm6155 | 0.0000 | No |
| 31766 | Gm6157 | 0.0000 | No |
| 31767 | Gm6158 | 0.0000 | No |
| 31768 | Gm6159 | 0.0000 | No |
| 31769 | Gm6162 | 0.0000 | No |
| 31770 | Gm6164 | 0.0000 | No |
| 31771 | Gm6166 | 0.0000 | No |
| 31772 | Gm6169 | 0.0000 | No |
| 31773 | Gm6170 | 0.0000 | No |
| 31774 | Gm6175 | 0.0000 | No |
| 31775 | Gm6176 | 0.0000 | No |
| 31776 | Gm6177 | 0.0000 | No |
| 31777 | Gm6180 | 0.0000 | No |
| 31778 | Gm6182 | 0.0000 | No |
| 31779 | Gm6184 | 0.0000 | No |
| 31780 | Gm6185 | 0.0000 | No |
| 31781 | Gm6187 | 0.0000 | No |
| 31782 | Gm6189 | 0.0000 | No |
| 31783 | Gm6195 | 0.0000 | No |

|       |        |        |    |
|-------|--------|--------|----|
| 31784 | Gm6197 | 0.0000 | No |
| 31785 | Gm6198 | 0.0000 | No |
| 31786 | Gm6203 | 0.0000 | No |
| 31787 | Gm6204 | 0.0000 | No |
| 31788 | Gm6205 | 0.0000 | No |
| 31789 | Gm6206 | 0.0000 | No |
| 31790 | Gm6207 | 0.0000 | No |
| 31791 | Gm6209 | 0.0000 | No |
| 31792 | Gm6210 | 0.0000 | No |
| 31793 | Gm6211 | 0.0000 | No |
| 31794 | Gm6213 | 0.0000 | No |
| 31795 | Gm6214 | 0.0000 | No |
| 31796 | Gm6215 | 0.0000 | No |
| 31797 | Gm6216 | 0.0000 | No |
| 31798 | Gm6221 | 0.0000 | No |
| 31799 | Gm6222 | 0.0000 | No |
| 31800 | Gm6225 | 0.0000 | No |
| 31801 | Gm6226 | 0.0000 | No |
| 31802 | Gm6228 | 0.0000 | No |
| 31803 | Gm6230 | 0.0000 | No |
| 31804 | Gm6236 | 0.0000 | No |
| 31805 | Gm6238 | 0.0000 | No |
| 31806 | Gm6240 | 0.0000 | No |
| 31807 | Gm6244 | 0.0000 | No |
| 31808 | Gm6245 | 0.0000 | No |
| 31809 | Gm6249 | 0.0000 | No |
| 31810 | Gm6253 | 0.0000 | No |
| 31811 | Gm6254 | 0.0000 | No |
| 31812 | Gm6260 | 0.0000 | No |
| 31813 | Gm6261 | 0.0000 | No |
| 31814 | Gm6263 | 0.0000 | No |
| 31815 | Gm6265 | 0.0000 | No |
| 31816 | Gm6266 | 0.0000 | No |
| 31817 | Gm6268 | 0.0000 | No |
| 31818 | Gm6272 | 0.0000 | No |
| 31819 | Gm6274 | 0.0000 | No |
| 31820 | Gm6276 | 0.0000 | No |
| 31821 | Gm6277 | 0.0000 | No |
| 31822 | Gm6283 | 0.0000 | No |
| 31823 | Gm6284 | 0.0000 | No |
| 31824 | Gm6285 | 0.0000 | No |
| 31825 | Gm6286 | 0.0000 | No |
| 31826 | Gm6288 | 0.0000 | No |
| 31827 | Gm6290 | 0.0000 | No |
| 31828 | Gm6291 | 0.0000 | No |
| 31829 | Gm6292 | 0.0000 | No |

|       |        |        |    |
|-------|--------|--------|----|
| 31830 | Gm6293 | 0.0000 | No |
| 31831 | Gm6297 | 0.0000 | No |
| 31832 | Gm6298 | 0.0000 | No |
| 31833 | Gm6300 | 0.0000 | No |
| 31834 | Gm6303 | 0.0000 | No |
| 31835 | Gm6304 | 0.0000 | No |
| 31836 | Gm6305 | 0.0000 | No |
| 31837 | Gm6308 | 0.0000 | No |
| 31838 | Gm6311 | 0.0000 | No |
| 31839 | Gm6312 | 0.0000 | No |
| 31840 | Gm6313 | 0.0000 | No |
| 31841 | Gm6316 | 0.0000 | No |
| 31842 | Gm6317 | 0.0000 | No |
| 31843 | Gm6321 | 0.0000 | No |
| 31844 | Gm6322 | 0.0000 | No |
| 31845 | Gm6325 | 0.0000 | No |
| 31846 | Gm6329 | 0.0000 | No |
| 31847 | Gm6335 | 0.0000 | No |
| 31848 | Gm6337 | 0.0000 | No |
| 31849 | Gm6341 | 0.0000 | No |
| 31850 | Gm6342 | 0.0000 | No |
| 31851 | Gm6344 | 0.0000 | No |
| 31852 | Gm6345 | 0.0000 | No |
| 31853 | Gm6346 | 0.0000 | No |
| 31854 | Gm6348 | 0.0000 | No |
| 31855 | Gm6350 | 0.0000 | No |
| 31856 | Gm6351 | 0.0000 | No |
| 31857 | Gm6352 | 0.0000 | No |
| 31858 | Gm6358 | 0.0000 | No |
| 31859 | Gm6361 | 0.0000 | No |
| 31860 | Gm6365 | 0.0000 | No |
| 31861 | Gm6367 | 0.0000 | No |
| 31862 | Gm6368 | 0.0000 | No |
| 31863 | Gm6369 | 0.0000 | No |
| 31864 | Gm6370 | 0.0000 | No |
| 31865 | Gm6373 | 0.0000 | No |
| 31866 | Gm6374 | 0.0000 | No |
| 31867 | Gm6375 | 0.0000 | No |
| 31868 | Gm6376 | 0.0000 | No |
| 31869 | Gm6378 | 0.0000 | No |
| 31870 | Gm6382 | 0.0000 | No |
| 31871 | Gm6394 | 0.0000 | No |
| 31872 | Gm6395 | 0.0000 | No |
| 31873 | Gm6397 | 0.0000 | No |
| 31874 | Gm6401 | 0.0000 | No |
| 31875 | Gm6407 | 0.0000 | No |

|       |        |        |    |
|-------|--------|--------|----|
| 31876 | Gm6408 | 0.0000 | No |
| 31877 | Gm6410 | 0.0000 | No |
| 31878 | Gm6418 | 0.0000 | No |
| 31879 | Gm6419 | 0.0000 | No |
| 31880 | Gm6420 | 0.0000 | No |
| 31881 | Gm6421 | 0.0000 | No |
| 31882 | Gm6425 | 0.0000 | No |
| 31883 | Gm6426 | 0.0000 | No |
| 31884 | Gm6427 | 0.0000 | No |
| 31885 | Gm6428 | 0.0000 | No |
| 31886 | Gm6429 | 0.0000 | No |
| 31887 | Gm6430 | 0.0000 | No |
| 31888 | Gm6433 | 0.0000 | No |
| 31889 | Gm6434 | 0.0000 | No |
| 31890 | Gm6439 | 0.0000 | No |
| 31891 | Gm6443 | 0.0000 | No |
| 31892 | Gm6444 | 0.0000 | No |
| 31893 | Gm6445 | 0.0000 | No |
| 31894 | Gm6446 | 0.0000 | No |
| 31895 | Gm6447 | 0.0000 | No |
| 31896 | Gm6450 | 0.0000 | No |
| 31897 | Gm6451 | 0.0000 | No |
| 31898 | Gm6457 | 0.0000 | No |
| 31899 | Gm6460 | 0.0000 | No |
| 31900 | Gm6461 | 0.0000 | No |
| 31901 | Gm6462 | 0.0000 | No |
| 31902 | Gm6463 | 0.0000 | No |
| 31903 | Gm6465 | 0.0000 | No |
| 31904 | Gm6467 | 0.0000 | No |
| 31905 | Gm6468 | 0.0000 | No |
| 31906 | Gm6472 | 0.0000 | No |
| 31907 | Gm6473 | 0.0000 | No |
| 31908 | Gm6478 | 0.0000 | No |
| 31909 | Gm648  | 0.0000 | No |
| 31910 | Gm6480 | 0.0000 | No |
| 31911 | Gm6482 | 0.0000 | No |
| 31912 | Gm6483 | 0.0000 | No |
| 31913 | Gm6485 | 0.0000 | No |
| 31914 | Gm6486 | 0.0000 | No |
| 31915 | Gm6489 | 0.0000 | No |
| 31916 | Gm649  | 0.0000 | No |
| 31917 | Gm6490 | 0.0000 | No |
| 31918 | Gm6491 | 0.0000 | No |
| 31919 | Gm6493 | 0.0000 | No |
| 31920 | Gm6498 | 0.0000 | No |
| 31921 | Gm650  | 0.0000 | No |

|       |        |        |    |
|-------|--------|--------|----|
| 31922 | Gm6500 | 0.0000 | No |
| 31923 | Gm6501 | 0.0000 | No |
| 31924 | Gm6502 | 0.0000 | No |
| 31925 | Gm6503 | 0.0000 | No |
| 31926 | Gm6505 | 0.0000 | No |
| 31927 | Gm6506 | 0.0000 | No |
| 31928 | Gm6507 | 0.0000 | No |
| 31929 | Gm6509 | 0.0000 | No |
| 31930 | Gm6510 | 0.0000 | No |
| 31931 | Gm6517 | 0.0000 | No |
| 31932 | Gm6518 | 0.0000 | No |
| 31933 | Gm6520 | 0.0000 | No |
| 31934 | Gm6522 | 0.0000 | No |
| 31935 | Gm6524 | 0.0000 | No |
| 31936 | Gm6525 | 0.0000 | No |
| 31937 | Gm6526 | 0.0000 | No |
| 31938 | Gm6536 | 0.0000 | No |
| 31939 | Gm6539 | 0.0000 | No |
| 31940 | Gm6542 | 0.0000 | No |
| 31941 | Gm6543 | 0.0000 | No |
| 31942 | Gm6546 | 0.0000 | No |
| 31943 | Gm6548 | 0.0000 | No |
| 31944 | Gm6550 | 0.0000 | No |
| 31945 | Gm6555 | 0.0000 | No |
| 31946 | Gm6556 | 0.0000 | No |
| 31947 | Gm6558 | 0.0000 | No |
| 31948 | Gm6559 | 0.0000 | No |
| 31949 | Gm6560 | 0.0000 | No |
| 31950 | Gm6563 | 0.0000 | No |
| 31951 | Gm6564 | 0.0000 | No |
| 31952 | Gm6565 | 0.0000 | No |
| 31953 | Gm6567 | 0.0000 | No |
| 31954 | Gm6568 | 0.0000 | No |
| 31955 | Gm6569 | 0.0000 | No |
| 31956 | Gm6574 | 0.0000 | No |
| 31957 | Gm6576 | 0.0000 | No |
| 31958 | Gm6578 | 0.0000 | No |
| 31959 | Gm6580 | 0.0000 | No |
| 31960 | Gm6583 | 0.0000 | No |
| 31961 | Gm6584 | 0.0000 | No |
| 31962 | Gm6586 | 0.0000 | No |
| 31963 | Gm6587 | 0.0000 | No |
| 31964 | Gm6588 | 0.0000 | No |
| 31965 | Gm6591 | 0.0000 | No |
| 31966 | Gm6592 | 0.0000 | No |
| 31967 | Gm6593 | 0.0000 | No |

|       |        |        |    |
|-------|--------|--------|----|
| 31968 | Gm6594 | 0.0000 | No |
| 31969 | Gm6602 | 0.0000 | No |
| 31970 | Gm6605 | 0.0000 | No |
| 31971 | Gm6610 | 0.0000 | No |
| 31972 | Gm6611 | 0.0000 | No |
| 31973 | Gm6612 | 0.0000 | No |
| 31974 | Gm6614 | 0.0000 | No |
| 31975 | Gm6615 | 0.0000 | No |
| 31976 | Gm6621 | 0.0000 | No |
| 31977 | Gm6623 | 0.0000 | No |
| 31978 | Gm6625 | 0.0000 | No |
| 31979 | Gm6631 | 0.0000 | No |
| 31980 | Gm6632 | 0.0000 | No |
| 31981 | Gm6633 | 0.0000 | No |
| 31982 | Gm6634 | 0.0000 | No |
| 31983 | Gm6639 | 0.0000 | No |
| 31984 | Gm6641 | 0.0000 | No |
| 31985 | Gm6644 | 0.0000 | No |
| 31986 | Gm6645 | 0.0000 | No |
| 31987 | Gm6649 | 0.0000 | No |
| 31988 | Gm6651 | 0.0000 | No |
| 31989 | Gm6652 | 0.0000 | No |
| 31990 | Gm6654 | 0.0000 | No |
| 31991 | Gm6655 | 0.0000 | No |
| 31992 | Gm6657 | 0.0000 | No |
| 31993 | Gm6658 | 0.0000 | No |
| 31994 | Gm6659 | 0.0000 | No |
| 31995 | Gm6660 | 0.0000 | No |
| 31996 | Gm6664 | 0.0000 | No |
| 31997 | Gm6665 | 0.0000 | No |
| 31998 | Gm6669 | 0.0000 | No |
| 31999 | Gm6673 | 0.0000 | No |
| 32000 | Gm6676 | 0.0000 | No |
| 32001 | Gm6677 | 0.0000 | No |
| 32002 | Gm6679 | 0.0000 | No |
| 32003 | Gm6680 | 0.0000 | No |
| 32004 | Gm6681 | 0.0000 | No |
| 32005 | Gm6682 | 0.0000 | No |
| 32006 | Gm6684 | 0.0000 | No |
| 32007 | Gm6685 | 0.0000 | No |
| 32008 | Gm6686 | 0.0000 | No |
| 32009 | Gm6689 | 0.0000 | No |
| 32010 | Gm6693 | 0.0000 | No |
| 32011 | Gm6695 | 0.0000 | No |
| 32012 | Gm6702 | 0.0000 | No |
| 32013 | Gm6706 | 0.0000 | No |



|       |        |        |    |
|-------|--------|--------|----|
| 32014 | Gm6710 | 0.0000 | No |
| 32015 | Gm6712 | 0.0000 | No |
| 32016 | Gm6717 | 0.0000 | No |
| 32017 | Gm6719 | 0.0000 | No |
| 32018 | Gm6723 | 0.0000 | No |
| 32019 | Gm6727 | 0.0000 | No |
| 32020 | Gm6728 | 0.0000 | No |
| 32021 | Gm6729 | 0.0000 | No |
| 32022 | Gm6733 | 0.0000 | No |
| 32023 | Gm6736 | 0.0000 | No |
| 32024 | Gm6740 | 0.0000 | No |
| 32025 | Gm6743 | 0.0000 | No |
| 32026 | Gm6744 | 0.0000 | No |
| 32027 | Gm6745 | 0.0000 | No |
| 32028 | Gm6746 | 0.0000 | No |
| 32029 | Gm6750 | 0.0000 | No |
| 32030 | Gm6754 | 0.0000 | No |
| 32031 | Gm6755 | 0.0000 | No |
| 32032 | Gm6756 | 0.0000 | No |
| 32033 | Gm6757 | 0.0000 | No |
| 32034 | Gm6758 | 0.0000 | No |
| 32035 | Gm6760 | 0.0000 | No |
| 32036 | Gm6762 | 0.0000 | No |
| 32037 | Gm6763 | 0.0000 | No |
| 32038 | Gm6767 | 0.0000 | No |
| 32039 | Gm6768 | 0.0000 | No |
| 32040 | Gm6771 | 0.0000 | No |
| 32041 | Gm6773 | 0.0000 | No |
| 32042 | Gm6776 | 0.0000 | No |
| 32043 | Gm6781 | 0.0000 | No |
| 32044 | Gm6783 | 0.0000 | No |
| 32045 | Gm6786 | 0.0000 | No |
| 32046 | Gm6787 | 0.0000 | No |
| 32047 | Gm6788 | 0.0000 | No |
| 32048 | Gm6792 | 0.0000 | No |
| 32049 | Gm6793 | 0.0000 | No |
| 32050 | Gm6798 | 0.0000 | No |
| 32051 | Gm6799 | 0.0000 | No |
| 32052 | Gm6801 | 0.0000 | No |
| 32053 | Gm6802 | 0.0000 | No |
| 32054 | Gm6803 | 0.0000 | No |
| 32055 | Gm6807 | 0.0000 | No |
| 32056 | Gm6808 | 0.0000 | No |
| 32057 | Gm6811 | 0.0000 | No |
| 32058 | Gm6812 | 0.0000 | No |
| 32059 | Gm6818 | 0.0000 | No |

|       |        |        |    |
|-------|--------|--------|----|
| 32060 | Gm6819 | 0.0000 | No |
| 32061 | Gm6820 | 0.0000 | No |
| 32062 | Gm6821 | 0.0000 | No |
| 32063 | Gm6822 | 0.0000 | No |
| 32064 | Gm6823 | 0.0000 | No |
| 32065 | Gm6828 | 0.0000 | No |
| 32066 | Gm6829 | 0.0000 | No |
| 32067 | Gm6838 | 0.0000 | No |
| 32068 | Gm6842 | 0.0000 | No |
| 32069 | Gm6850 | 0.0000 | No |
| 32070 | Gm6853 | 0.0000 | No |
| 32071 | Gm6858 | 0.0000 | No |
| 32072 | Gm6863 | 0.0000 | No |
| 32073 | Gm6866 | 0.0000 | No |
| 32074 | Gm6871 | 0.0000 | No |
| 32075 | Gm6872 | 0.0000 | No |
| 32076 | Gm6877 | 0.0000 | No |
| 32077 | Gm6878 | 0.0000 | No |
| 32078 | Gm6880 | 0.0000 | No |
| 32079 | Gm6881 | 0.0000 | No |
| 32080 | Gm6887 | 0.0000 | No |
| 32081 | Gm6890 | 0.0000 | No |
| 32082 | Gm6897 | 0.0000 | No |
| 32083 | Gm6899 | 0.0000 | No |
| 32084 | Gm6900 | 0.0000 | No |
| 32085 | Gm6902 | 0.0000 | No |
| 32086 | Gm6904 | 0.0000 | No |
| 32087 | Gm6905 | 0.0000 | No |
| 32088 | Gm6912 | 0.0000 | No |
| 32089 | Gm6913 | 0.0000 | No |
| 32090 | Gm6918 | 0.0000 | No |
| 32091 | Gm6919 | 0.0000 | No |
| 32092 | Gm6921 | 0.0000 | No |
| 32093 | Gm6923 | 0.0000 | No |
| 32094 | Gm6929 | 0.0000 | No |
| 32095 | Gm6931 | 0.0000 | No |
| 32096 | Gm6934 | 0.0000 | No |
| 32097 | Gm6938 | 0.0000 | No |
| 32098 | Gm6939 | 0.0000 | No |
| 32099 | Gm6944 | 0.0000 | No |
| 32100 | Gm6946 | 0.0000 | No |
| 32101 | Gm6947 | 0.0000 | No |
| 32102 | Gm6952 | 0.0000 | No |
| 32103 | Gm6954 | 0.0000 | No |
| 32104 | Gm6956 | 0.0000 | No |
| 32105 | Gm6960 | 0.0000 | No |

|       |        |        |    |
|-------|--------|--------|----|
| 32106 | Gm6963 | 0.0000 | No |
| 32107 | Gm6964 | 0.0000 | No |
| 32108 | Gm6967 | 0.0000 | No |
| 32109 | Gm6969 | 0.0000 | No |
| 32110 | Gm6977 | 0.0000 | No |
| 32111 | Gm6981 | 0.0000 | No |
| 32112 | Gm6982 | 0.0000 | No |
| 32113 | Gm6985 | 0.0000 | No |
| 32114 | Gm6990 | 0.0000 | No |
| 32115 | Gm6994 | 0.0000 | No |
| 32116 | Gm6999 | 0.0000 | No |
| 32117 | Gm7003 | 0.0000 | No |
| 32118 | Gm7008 | 0.0000 | No |
| 32119 | Gm7019 | 0.0000 | No |
| 32120 | Gm7023 | 0.0000 | No |
| 32121 | Gm7027 | 0.0000 | No |
| 32122 | Gm7029 | 0.0000 | No |
| 32123 | Gm7030 | 0.0000 | No |
| 32124 | Gm7031 | 0.0000 | No |
| 32125 | Gm7039 | 0.0000 | No |
| 32126 | Gm7041 | 0.0000 | No |
| 32127 | Gm7047 | 0.0000 | No |
| 32128 | Gm7052 | 0.0000 | No |
| 32129 | Gm7058 | 0.0000 | No |
| 32130 | Gm7061 | 0.0000 | No |
| 32131 | Gm7063 | 0.0000 | No |
| 32132 | Gm7067 | 0.0000 | No |
| 32133 | Gm7068 | 0.0000 | No |
| 32134 | Gm7069 | 0.0000 | No |
| 32135 | Gm7071 | 0.0000 | No |
| 32136 | Gm7073 | 0.0000 | No |
| 32137 | Gm7076 | 0.0000 | No |
| 32138 | Gm7079 | 0.0000 | No |
| 32139 | Gm7082 | 0.0000 | No |
| 32140 | Gm7083 | 0.0000 | No |
| 32141 | Gm7091 | 0.0000 | No |
| 32142 | Gm7094 | 0.0000 | No |
| 32143 | Gm7097 | 0.0000 | No |
| 32144 | Gm7099 | 0.0000 | No |
| 32145 | Gm7102 | 0.0000 | No |
| 32146 | Gm7103 | 0.0000 | No |
| 32147 | Gm7108 | 0.0000 | No |
| 32148 | Gm7113 | 0.0000 | No |
| 32149 | Gm7114 | 0.0000 | No |
| 32150 | Gm7115 | 0.0000 | No |
| 32151 | Gm7117 | 0.0000 | No |

|       |        |        |    |
|-------|--------|--------|----|
| 32152 | Gm7118 | 0.0000 | No |
| 32153 | Gm7123 | 0.0000 | No |
| 32154 | Gm7128 | 0.0000 | No |
| 32155 | Gm7129 | 0.0000 | No |
| 32156 | Gm7132 | 0.0000 | No |
| 32157 | Gm7133 | 0.0000 | No |
| 32158 | Gm7134 | 0.0000 | No |
| 32159 | Gm7135 | 0.0000 | No |
| 32160 | Gm7137 | 0.0000 | No |
| 32161 | Gm7138 | 0.0000 | No |
| 32162 | Gm7146 | 0.0000 | No |
| 32163 | Gm715  | 0.0000 | No |
| 32164 | Gm7150 | 0.0000 | No |
| 32165 | Gm7151 | 0.0000 | No |
| 32166 | Gm7152 | 0.0000 | No |
| 32167 | Gm7153 | 0.0000 | No |
| 32168 | Gm7155 | 0.0000 | No |
| 32169 | Gm7158 | 0.0000 | No |
| 32170 | Gm7160 | 0.0000 | No |
| 32171 | Gm7162 | 0.0000 | No |
| 32172 | Gm7164 | 0.0000 | No |
| 32173 | Gm7166 | 0.0000 | No |
| 32174 | Gm7168 | 0.0000 | No |
| 32175 | Gm7171 | 0.0000 | No |
| 32176 | Gm7173 | 0.0000 | No |
| 32177 | Gm7180 | 0.0000 | No |
| 32178 | Gm7181 | 0.0000 | No |
| 32179 | Gm7182 | 0.0000 | No |
| 32180 | Gm7189 | 0.0000 | No |
| 32181 | Gm7191 | 0.0000 | No |
| 32182 | Gm7192 | 0.0000 | No |
| 32183 | Gm7199 | 0.0000 | No |
| 32184 | Gm7200 | 0.0000 | No |
| 32185 | Gm7203 | 0.0000 | No |
| 32186 | Gm7204 | 0.0000 | No |
| 32187 | Gm7205 | 0.0000 | No |
| 32188 | Gm7206 | 0.0000 | No |
| 32189 | Gm7207 | 0.0000 | No |
| 32190 | Gm7209 | 0.0000 | No |
| 32191 | Gm7210 | 0.0000 | No |
| 32192 | Gm7211 | 0.0000 | No |
| 32193 | Gm7222 | 0.0000 | No |
| 32194 | Gm7224 | 0.0000 | No |
| 32195 | Gm7230 | 0.0000 | No |
| 32196 | Gm7233 | 0.0000 | No |
| 32197 | Gm7236 | 0.0000 | No |

|       |        |        |    |
|-------|--------|--------|----|
| 32198 | Gm7238 | 0.0000 | No |
| 32199 | Gm7241 | 0.0000 | No |
| 32200 | Gm7244 | 0.0000 | No |
| 32201 | Gm7247 | 0.0000 | No |
| 32202 | Gm7251 | 0.0000 | No |
| 32203 | Gm7255 | 0.0000 | No |
| 32204 | Gm7257 | 0.0000 | No |
| 32205 | Gm7265 | 0.0000 | No |
| 32206 | Gm7266 | 0.0000 | No |
| 32207 | Gm7269 | 0.0000 | No |
| 32208 | Gm7270 | 0.0000 | No |
| 32209 | Gm7271 | 0.0000 | No |
| 32210 | Gm7276 | 0.0000 | No |
| 32211 | Gm7278 | 0.0000 | No |
| 32212 | Gm7281 | 0.0000 | No |
| 32213 | Gm7285 | 0.0000 | No |
| 32214 | Gm7286 | 0.0000 | No |
| 32215 | Gm7287 | 0.0000 | No |
| 32216 | Gm7289 | 0.0000 | No |
| 32217 | Gm7290 | 0.0000 | No |
| 32218 | Gm7291 | 0.0000 | No |
| 32219 | Gm7292 | 0.0000 | No |
| 32220 | Gm7293 | 0.0000 | No |
| 32221 | Gm7298 | 0.0000 | No |
| 32222 | Gm7299 | 0.0000 | No |
| 32223 | Gm7308 | 0.0000 | No |
| 32224 | Gm7309 | 0.0000 | No |
| 32225 | Gm7312 | 0.0000 | No |
| 32226 | Gm7316 | 0.0000 | No |
| 32227 | Gm7319 | 0.0000 | No |
| 32228 | Gm732  | 0.0000 | No |
| 32229 | Gm7324 | 0.0000 | No |
| 32230 | Gm7325 | 0.0000 | No |
| 32231 | Gm7327 | 0.0000 | No |
| 32232 | Gm7328 | 0.0000 | No |
| 32233 | Gm7331 | 0.0000 | No |
| 32234 | Gm7332 | 0.0000 | No |
| 32235 | Gm7334 | 0.0000 | No |
| 32236 | Gm7335 | 0.0000 | No |
| 32237 | Gm7336 | 0.0000 | No |
| 32238 | Gm7337 | 0.0000 | No |
| 32239 | Gm7340 | 0.0000 | No |
| 32240 | Gm7343 | 0.0000 | No |
| 32241 | Gm7346 | 0.0000 | No |
| 32242 | Gm7347 | 0.0000 | No |
| 32243 | Gm7350 | 0.0000 | No |

|       |        |        |    |
|-------|--------|--------|----|
| 32244 | Gm7351 | 0.0000 | No |
| 32245 | Gm7352 | 0.0000 | No |
| 32246 | Gm7353 | 0.0000 | No |
| 32247 | Gm7356 | 0.0000 | No |
| 32248 | Gm7357 | 0.0000 | No |
| 32249 | Gm7358 | 0.0000 | No |
| 32250 | Gm7363 | 0.0000 | No |
| 32251 | Gm7364 | 0.0000 | No |
| 32252 | Gm7365 | 0.0000 | No |
| 32253 | Gm7367 | 0.0000 | No |
| 32254 | Gm7369 | 0.0000 | No |
| 32255 | Gm7375 | 0.0000 | No |
| 32256 | Gm7380 | 0.0000 | No |
| 32257 | Gm7384 | 0.0000 | No |
| 32258 | Gm7386 | 0.0000 | No |
| 32259 | Gm7389 | 0.0000 | No |
| 32260 | Gm7391 | 0.0000 | No |
| 32261 | Gm7393 | 0.0000 | No |
| 32262 | Gm7394 | 0.0000 | No |
| 32263 | Gm7397 | 0.0000 | No |
| 32264 | Gm7398 | 0.0000 | No |
| 32265 | Gm7399 | 0.0000 | No |
| 32266 | Gm7405 | 0.0000 | No |
| 32267 | Gm7407 | 0.0000 | No |
| 32268 | Gm7408 | 0.0000 | No |
| 32269 | Gm7412 | 0.0000 | No |
| 32270 | Gm7415 | 0.0000 | No |
| 32271 | Gm7417 | 0.0000 | No |
| 32272 | Gm7418 | 0.0000 | No |
| 32273 | Gm7420 | 0.0000 | No |
| 32274 | Gm7421 | 0.0000 | No |
| 32275 | Gm7424 | 0.0000 | No |
| 32276 | Gm7426 | 0.0000 | No |
| 32277 | Gm7429 | 0.0000 | No |
| 32278 | Gm7430 | 0.0000 | No |
| 32279 | Gm7432 | 0.0000 | No |
| 32280 | Gm7434 | 0.0000 | No |
| 32281 | Gm7436 | 0.0000 | No |
| 32282 | Gm7437 | 0.0000 | No |
| 32283 | Gm7438 | 0.0000 | No |
| 32284 | Gm7445 | 0.0000 | No |
| 32285 | Gm7449 | 0.0000 | No |
| 32286 | Gm7456 | 0.0000 | No |
| 32287 | Gm7461 | 0.0000 | No |
| 32288 | Gm7467 | 0.0000 | No |
| 32289 | Gm7468 | 0.0000 | No |

|       |        |        |    |
|-------|--------|--------|----|
| 32290 | Gm7470 | 0.0000 | No |
| 32291 | Gm7478 | 0.0000 | No |
| 32292 | Gm7481 | 0.0000 | No |
| 32293 | Gm7482 | 0.0000 | No |
| 32294 | Gm7485 | 0.0000 | No |
| 32295 | Gm7488 | 0.0000 | No |
| 32296 | Gm7492 | 0.0000 | No |
| 32297 | Gm7493 | 0.0000 | No |
| 32298 | Gm7494 | 0.0000 | No |
| 32299 | Gm7496 | 0.0000 | No |
| 32300 | Gm7497 | 0.0000 | No |
| 32301 | Gm7502 | 0.0000 | No |
| 32302 | Gm7504 | 0.0000 | No |
| 32303 | Gm7506 | 0.0000 | No |
| 32304 | Gm7507 | 0.0000 | No |
| 32305 | Gm7512 | 0.0000 | No |
| 32306 | Gm7514 | 0.0000 | No |
| 32307 | Gm7516 | 0.0000 | No |
| 32308 | Gm7534 | 0.0000 | No |
| 32309 | Gm7535 | 0.0000 | No |
| 32310 | Gm7536 | 0.0000 | No |
| 32311 | Gm7538 | 0.0000 | No |
| 32312 | Gm7541 | 0.0000 | No |
| 32313 | Gm7542 | 0.0000 | No |
| 32314 | Gm7545 | 0.0000 | No |
| 32315 | Gm7546 | 0.0000 | No |
| 32316 | Gm7551 | 0.0000 | No |
| 32317 | Gm7553 | 0.0000 | No |
| 32318 | Gm7554 | 0.0000 | No |
| 32319 | Gm7556 | 0.0000 | No |
| 32320 | Gm7558 | 0.0000 | No |
| 32321 | Gm7560 | 0.0000 | No |
| 32322 | Gm7565 | 0.0000 | No |
| 32323 | Gm7568 | 0.0000 | No |
| 32324 | Gm7571 | 0.0000 | No |
| 32325 | Gm7572 | 0.0000 | No |
| 32326 | Gm7577 | 0.0000 | No |
| 32327 | Gm7579 | 0.0000 | No |
| 32328 | Gm7580 | 0.0000 | No |
| 32329 | Gm7582 | 0.0000 | No |
| 32330 | Gm7583 | 0.0000 | No |
| 32331 | Gm7584 | 0.0000 | No |
| 32332 | Gm7587 | 0.0000 | No |
| 32333 | Gm7589 | 0.0000 | No |
| 32334 | Gm7593 | 0.0000 | No |
| 32335 | Gm7596 | 0.0000 | No |

|       |        |        |    |
|-------|--------|--------|----|
| 32336 | Gm7598 | 0.0000 | No |
| 32337 | Gm7599 | 0.0000 | No |
| 32338 | Gm7600 | 0.0000 | No |
| 32339 | Gm7609 | 0.0000 | No |
| 32340 | Gm7611 | 0.0000 | No |
| 32341 | Gm7613 | 0.0000 | No |
| 32342 | Gm7616 | 0.0000 | No |
| 32343 | Gm7618 | 0.0000 | No |
| 32344 | Gm7619 | 0.0000 | No |
| 32345 | Gm7624 | 0.0000 | No |
| 32346 | Gm7626 | 0.0000 | No |
| 32347 | Gm7627 | 0.0000 | No |
| 32348 | Gm7628 | 0.0000 | No |
| 32349 | Gm7631 | 0.0000 | No |
| 32350 | Gm7634 | 0.0000 | No |
| 32351 | Gm7638 | 0.0000 | No |
| 32352 | Gm7645 | 0.0000 | No |
| 32353 | Gm7647 | 0.0000 | No |
| 32354 | Gm7648 | 0.0000 | No |
| 32355 | Gm765  | 0.0000 | No |
| 32356 | Gm7651 | 0.0000 | No |
| 32357 | Gm7652 | 0.0000 | No |
| 32358 | Gm7654 | 0.0000 | No |
| 32359 | Gm7657 | 0.0000 | No |
| 32360 | Gm7658 | 0.0000 | No |
| 32361 | Gm7663 | 0.0000 | No |
| 32362 | Gm7664 | 0.0000 | No |
| 32363 | Gm7666 | 0.0000 | No |
| 32364 | Gm7669 | 0.0000 | No |
| 32365 | Gm7670 | 0.0000 | No |
| 32366 | Gm7672 | 0.0000 | No |
| 32367 | Gm7675 | 0.0000 | No |
| 32368 | Gm7676 | 0.0000 | No |
| 32369 | Gm7678 | 0.0000 | No |
| 32370 | Gm7682 | 0.0000 | No |
| 32371 | Gm7690 | 0.0000 | No |
| 32372 | Gm7693 | 0.0000 | No |
| 32373 | Gm7696 | 0.0000 | No |
| 32374 | Gm7697 | 0.0000 | No |
| 32375 | Gm7701 | 0.0000 | No |
| 32376 | Gm7707 | 0.0000 | No |
| 32377 | Gm7709 | 0.0000 | No |
| 32378 | Gm7714 | 0.0000 | No |
| 32379 | Gm7719 | 0.0000 | No |
| 32380 | Gm7721 | 0.0000 | No |
| 32381 | Gm7722 | 0.0000 | No |



|       |        |        |    |
|-------|--------|--------|----|
| 32382 | Gm7729 | 0.0000 | No |
| 32383 | Gm773  | 0.0000 | No |
| 32384 | Gm7731 | 0.0000 | No |
| 32385 | Gm7732 | 0.0000 | No |
| 32386 | Gm7734 | 0.0000 | No |
| 32387 | Gm7735 | 0.0000 | No |
| 32388 | Gm7736 | 0.0000 | No |
| 32389 | Gm7740 | 0.0000 | No |
| 32390 | Gm7741 | 0.0000 | No |
| 32391 | Gm7742 | 0.0000 | No |
| 32392 | Gm7745 | 0.0000 | No |
| 32393 | Gm7761 | 0.0000 | No |
| 32394 | Gm7763 | 0.0000 | No |
| 32395 | Gm7765 | 0.0000 | No |
| 32396 | Gm7774 | 0.0000 | No |
| 32397 | Gm7776 | 0.0000 | No |
| 32398 | Gm7781 | 0.0000 | No |
| 32399 | Gm7783 | 0.0000 | No |
| 32400 | Gm7784 | 0.0000 | No |
| 32401 | Gm7785 | 0.0000 | No |
| 32402 | Gm7786 | 0.0000 | No |
| 32403 | Gm7789 | 0.0000 | No |
| 32404 | Gm7792 | 0.0000 | No |
| 32405 | Gm7799 | 0.0000 | No |
| 32406 | Gm7803 | 0.0000 | No |
| 32407 | Gm7804 | 0.0000 | No |
| 32408 | Gm7805 | 0.0000 | No |
| 32409 | Gm7809 | 0.0000 | No |
| 32410 | Gm7812 | 0.0000 | No |
| 32411 | Gm7815 | 0.0000 | No |
| 32412 | Gm7816 | 0.0000 | No |
| 32413 | Gm7820 | 0.0000 | No |
| 32414 | Gm7821 | 0.0000 | No |
| 32415 | Gm7823 | 0.0000 | No |
| 32416 | Gm7824 | 0.0000 | No |
| 32417 | Gm7825 | 0.0000 | No |
| 32418 | Gm7831 | 0.0000 | No |
| 32419 | Gm7832 | 0.0000 | No |
| 32420 | Gm7833 | 0.0000 | No |
| 32421 | Gm7834 | 0.0000 | No |
| 32422 | Gm7836 | 0.0000 | No |
| 32423 | Gm7837 | 0.0000 | No |
| 32424 | Gm7838 | 0.0000 | No |
| 32425 | Gm7839 | 0.0000 | No |
| 32426 | Gm7840 | 0.0000 | No |
| 32427 | Gm7841 | 0.0000 | No |

|       |        |        |    |
|-------|--------|--------|----|
| 32428 | Gm7846 | 0.0000 | No |
| 32429 | Gm7847 | 0.0000 | No |
| 32430 | Gm7848 | 0.0000 | No |
| 32431 | Gm7849 | 0.0000 | No |
| 32432 | Gm7851 | 0.0000 | No |
| 32433 | Gm7853 | 0.0000 | No |
| 32434 | Gm7855 | 0.0000 | No |
| 32435 | Gm7856 | 0.0000 | No |
| 32436 | Gm7857 | 0.0000 | No |
| 32437 | Gm7858 | 0.0000 | No |
| 32438 | Gm7860 | 0.0000 | No |
| 32439 | Gm7861 | 0.0000 | No |
| 32440 | Gm7862 | 0.0000 | No |
| 32441 | Gm7863 | 0.0000 | No |
| 32442 | Gm7866 | 0.0000 | No |
| 32443 | Gm7867 | 0.0000 | No |
| 32444 | Gm7869 | 0.0000 | No |
| 32445 | Gm7870 | 0.0000 | No |
| 32446 | Gm7871 | 0.0000 | No |
| 32447 | Gm7876 | 0.0000 | No |
| 32448 | Gm7879 | 0.0000 | No |
| 32449 | Gm7880 | 0.0000 | No |
| 32450 | Gm7882 | 0.0000 | No |
| 32451 | Gm7887 | 0.0000 | No |
| 32452 | Gm7889 | 0.0000 | No |
| 32453 | Gm7890 | 0.0000 | No |
| 32454 | Gm7891 | 0.0000 | No |
| 32455 | Gm7895 | 0.0000 | No |
| 32456 | Gm7899 | 0.0000 | No |
| 32457 | Gm7901 | 0.0000 | No |
| 32458 | Gm7902 | 0.0000 | No |
| 32459 | Gm7903 | 0.0000 | No |
| 32460 | Gm7905 | 0.0000 | No |
| 32461 | Gm7909 | 0.0000 | No |
| 32462 | Gm7910 | 0.0000 | No |
| 32463 | Gm7916 | 0.0000 | No |
| 32464 | Gm7924 | 0.0000 | No |
| 32465 | Gm7925 | 0.0000 | No |
| 32466 | Gm7927 | 0.0000 | No |
| 32467 | Gm7928 | 0.0000 | No |
| 32468 | Gm7929 | 0.0000 | No |
| 32469 | Gm7931 | 0.0000 | No |
| 32470 | Gm7932 | 0.0000 | No |
| 32471 | Gm7933 | 0.0000 | No |
| 32472 | Gm7935 | 0.0000 | No |
| 32473 | Gm7936 | 0.0000 | No |

|       |        |        |    |
|-------|--------|--------|----|
| 32474 | Gm7939 | 0.0000 | No |
| 32475 | Gm7942 | 0.0000 | No |
| 32476 | Gm7945 | 0.0000 | No |
| 32477 | Gm7946 | 0.0000 | No |
| 32478 | Gm7950 | 0.0000 | No |
| 32479 | Gm7951 | 0.0000 | No |
| 32480 | Gm7952 | 0.0000 | No |
| 32481 | Gm7953 | 0.0000 | No |
| 32482 | Gm7954 | 0.0000 | No |
| 32483 | Gm7957 | 0.0000 | No |
| 32484 | Gm7958 | 0.0000 | No |
| 32485 | Gm7961 | 0.0000 | No |
| 32486 | Gm7964 | 0.0000 | No |
| 32487 | Gm7965 | 0.0000 | No |
| 32488 | Gm7967 | 0.0000 | No |
| 32489 | Gm7970 | 0.0000 | No |
| 32490 | Gm7971 | 0.0000 | No |
| 32491 | Gm7972 | 0.0000 | No |
| 32492 | Gm7973 | 0.0000 | No |
| 32493 | Gm7974 | 0.0000 | No |
| 32494 | Gm7976 | 0.0000 | No |
| 32495 | Gm7977 | 0.0000 | No |
| 32496 | Gm7978 | 0.0000 | No |
| 32497 | Gm7980 | 0.0000 | No |
| 32498 | Gm7982 | 0.0000 | No |
| 32499 | Gm7984 | 0.0000 | No |
| 32500 | Gm7985 | 0.0000 | No |
| 32501 | Gm7988 | 0.0000 | No |
| 32502 | Gm7991 | 0.0000 | No |
| 32503 | Gm7993 | 0.0000 | No |
| 32504 | Gm7995 | 0.0000 | No |
| 32505 | Gm7997 | 0.0000 | No |
| 32506 | Gm8000 | 0.0000 | No |
| 32507 | Gm8004 | 0.0000 | No |
| 32508 | Gm8005 | 0.0000 | No |
| 32509 | Gm8009 | 0.0000 | No |
| 32510 | Gm8010 | 0.0000 | No |
| 32511 | Gm8011 | 0.0000 | No |
| 32512 | Gm8013 | 0.0000 | No |
| 32513 | Gm8019 | 0.0000 | No |
| 32514 | Gm8022 | 0.0000 | No |
| 32515 | Gm8023 | 0.0000 | No |
| 32516 | Gm8024 | 0.0000 | No |
| 32517 | Gm8032 | 0.0000 | No |
| 32518 | Gm8034 | 0.0000 | No |
| 32519 | Gm8035 | 0.0000 | No |

|       |        |        |    |
|-------|--------|--------|----|
| 32520 | Gm8036 | 0.0000 | No |
| 32521 | Gm8038 | 0.0000 | No |
| 32522 | Gm8039 | 0.0000 | No |
| 32523 | Gm8041 | 0.0000 | No |
| 32524 | Gm8046 | 0.0000 | No |
| 32525 | Gm8048 | 0.0000 | No |
| 32526 | Gm805  | 0.0000 | No |
| 32527 | Gm8050 | 0.0000 | No |
| 32528 | Gm8051 | 0.0000 | No |
| 32529 | Gm8054 | 0.0000 | No |
| 32530 | Gm8055 | 0.0000 | No |
| 32531 | Gm8061 | 0.0000 | No |
| 32532 | Gm8062 | 0.0000 | No |
| 32533 | Gm8065 | 0.0000 | No |
| 32534 | Gm8066 | 0.0000 | No |
| 32535 | Gm8074 | 0.0000 | No |
| 32536 | Gm8077 | 0.0000 | No |
| 32537 | Gm8079 | 0.0000 | No |
| 32538 | Gm8080 | 0.0000 | No |
| 32539 | Gm8082 | 0.0000 | No |
| 32540 | Gm8083 | 0.0000 | No |
| 32541 | Gm8084 | 0.0000 | No |
| 32542 | Gm8087 | 0.0000 | No |
| 32543 | Gm8093 | 0.0000 | No |
| 32544 | Gm8094 | 0.0000 | No |
| 32545 | Gm8097 | 0.0000 | No |
| 32546 | Gm8098 | 0.0000 | No |
| 32547 | Gm8099 | 0.0000 | No |
| 32548 | Gm8100 | 0.0000 | No |
| 32549 | Gm8101 | 0.0000 | No |
| 32550 | Gm8107 | 0.0000 | No |
| 32551 | Gm8108 | 0.0000 | No |
| 32552 | Gm8110 | 0.0000 | No |
| 32553 | Gm8111 | 0.0000 | No |
| 32554 | Gm8112 | 0.0000 | No |
| 32555 | Gm8113 | 0.0000 | No |
| 32556 | Gm8114 | 0.0000 | No |
| 32557 | Gm8115 | 0.0000 | No |
| 32558 | Gm8116 | 0.0000 | No |
| 32559 | Gm8121 | 0.0000 | No |
| 32560 | Gm8122 | 0.0000 | No |
| 32561 | Gm8126 | 0.0000 | No |
| 32562 | Gm8129 | 0.0000 | No |
| 32563 | Gm8132 | 0.0000 | No |
| 32564 | Gm8138 | 0.0000 | No |
| 32565 | Gm8141 | 0.0000 | No |

|       |        |        |    |
|-------|--------|--------|----|
| 32566 | Gm8145 | 0.0000 | No |
| 32567 | Gm8146 | 0.0000 | No |
| 32568 | Gm8151 | 0.0000 | No |
| 32569 | Gm8152 | 0.0000 | No |
| 32570 | Gm8159 | 0.0000 | No |
| 32571 | Gm816  | 0.0000 | No |
| 32572 | Gm8161 | 0.0000 | No |
| 32573 | Gm8163 | 0.0000 | No |
| 32574 | Gm8164 | 0.0000 | No |
| 32575 | Gm8165 | 0.0000 | No |
| 32576 | Gm8167 | 0.0000 | No |
| 32577 | Gm8172 | 0.0000 | No |
| 32578 | Gm8173 | 0.0000 | No |
| 32579 | Gm8174 | 0.0000 | No |
| 32580 | Gm8176 | 0.0000 | No |
| 32581 | Gm8177 | 0.0000 | No |
| 32582 | Gm8178 | 0.0000 | No |
| 32583 | Gm8180 | 0.0000 | No |
| 32584 | Gm8185 | 0.0000 | No |
| 32585 | Gm8186 | 0.0000 | No |
| 32586 | Gm8189 | 0.0000 | No |
| 32587 | Gm8190 | 0.0000 | No |
| 32588 | Gm8192 | 0.0000 | No |
| 32589 | Gm8194 | 0.0000 | No |
| 32590 | Gm8197 | 0.0000 | No |
| 32591 | Gm8199 | 0.0000 | No |
| 32592 | Gm8200 | 0.0000 | No |
| 32593 | Gm8202 | 0.0000 | No |
| 32594 | Gm8203 | 0.0000 | No |
| 32595 | Gm8204 | 0.0000 | No |
| 32596 | Gm8206 | 0.0000 | No |
| 32597 | Gm8207 | 0.0000 | No |
| 32598 | Gm8210 | 0.0000 | No |
| 32599 | Gm8212 | 0.0000 | No |
| 32600 | Gm8213 | 0.0000 | No |
| 32601 | Gm8214 | 0.0000 | No |
| 32602 | Gm8215 | 0.0000 | No |
| 32603 | Gm8216 | 0.0000 | No |
| 32604 | Gm8217 | 0.0000 | No |
| 32605 | Gm8220 | 0.0000 | No |
| 32606 | Gm8224 | 0.0000 | No |
| 32607 | Gm8225 | 0.0000 | No |
| 32608 | Gm8226 | 0.0000 | No |
| 32609 | Gm8228 | 0.0000 | No |
| 32610 | Gm8229 | 0.0000 | No |
| 32611 | Gm8232 | 0.0000 | No |

|       |        |        |    |
|-------|--------|--------|----|
| 32612 | Gm8234 | 0.0000 | No |
| 32613 | Gm8239 | 0.0000 | No |
| 32614 | Gm8241 | 0.0000 | No |
| 32615 | Gm8244 | 0.0000 | No |
| 32616 | Gm8245 | 0.0000 | No |
| 32617 | Gm8246 | 0.0000 | No |
| 32618 | Gm8250 | 0.0000 | No |
| 32619 | Gm8251 | 0.0000 | No |
| 32620 | Gm8254 | 0.0000 | No |
| 32621 | Gm8256 | 0.0000 | No |
| 32622 | Gm8257 | 0.0000 | No |
| 32623 | Gm8258 | 0.0000 | No |
| 32624 | Gm826  | 0.0000 | No |
| 32625 | Gm8261 | 0.0000 | No |
| 32626 | Gm8265 | 0.0000 | No |
| 32627 | Gm8266 | 0.0000 | No |
| 32628 | Gm8267 | 0.0000 | No |
| 32629 | Gm8268 | 0.0000 | No |
| 32630 | Gm8271 | 0.0000 | No |
| 32631 | Gm8276 | 0.0000 | No |
| 32632 | Gm8279 | 0.0000 | No |
| 32633 | Gm8282 | 0.0000 | No |
| 32634 | Gm8285 | 0.0000 | No |
| 32635 | Gm8289 | 0.0000 | No |
| 32636 | Gm8291 | 0.0000 | No |
| 32637 | Gm8292 | 0.0000 | No |
| 32638 | Gm8296 | 0.0000 | No |
| 32639 | Gm8298 | 0.0000 | No |
| 32640 | Gm830  | 0.0000 | No |
| 32641 | Gm8300 | 0.0000 | No |
| 32642 | Gm8302 | 0.0000 | No |
| 32643 | Gm8303 | 0.0000 | No |
| 32644 | Gm8304 | 0.0000 | No |
| 32645 | Gm8305 | 0.0000 | No |
| 32646 | Gm8307 | 0.0000 | No |
| 32647 | Gm8309 | 0.0000 | No |
| 32648 | Gm831  | 0.0000 | No |
| 32649 | Gm8310 | 0.0000 | No |
| 32650 | Gm8312 | 0.0000 | No |
| 32651 | Gm8314 | 0.0000 | No |
| 32652 | Gm8317 | 0.0000 | No |
| 32653 | Gm8318 | 0.0000 | No |
| 32654 | Gm8319 | 0.0000 | No |
| 32655 | Gm8320 | 0.0000 | No |
| 32656 | Gm8323 | 0.0000 | No |
| 32657 | Gm8324 | 0.0000 | No |

|       |        |        |    |
|-------|--------|--------|----|
| 32658 | Gm8325 | 0.0000 | No |
| 32659 | Gm8326 | 0.0000 | No |
| 32660 | Gm833  | 0.0000 | No |
| 32661 | Gm8330 | 0.0000 | No |
| 32662 | Gm8331 | 0.0000 | No |
| 32663 | Gm8332 | 0.0000 | No |
| 32664 | Gm8334 | 0.0000 | No |
| 32665 | Gm8337 | 0.0000 | No |
| 32666 | Gm8338 | 0.0000 | No |
| 32667 | Gm8340 | 0.0000 | No |
| 32668 | Gm8342 | 0.0000 | No |
| 32669 | Gm8343 | 0.0000 | No |
| 32670 | Gm8344 | 0.0000 | No |
| 32671 | Gm8346 | 0.0000 | No |
| 32672 | Gm8349 | 0.0000 | No |
| 32673 | Gm8354 | 0.0000 | No |
| 32674 | Gm8355 | 0.0000 | No |
| 32675 | Gm8356 | 0.0000 | No |
| 32676 | Gm8357 | 0.0000 | No |
| 32677 | Gm8358 | 0.0000 | No |
| 32678 | Gm8362 | 0.0000 | No |
| 32679 | Gm8365 | 0.0000 | No |
| 32680 | Gm8366 | 0.0000 | No |
| 32681 | Gm8367 | 0.0000 | No |
| 32682 | Gm8369 | 0.0000 | No |
| 32683 | Gm8374 | 0.0000 | No |
| 32684 | Gm8378 | 0.0000 | No |
| 32685 | Gm8379 | 0.0000 | No |
| 32686 | Gm8383 | 0.0000 | No |
| 32687 | Gm8384 | 0.0000 | No |
| 32688 | Gm8385 | 0.0000 | No |
| 32689 | Gm8388 | 0.0000 | No |
| 32690 | Gm839  | 0.0000 | No |
| 32691 | Gm8392 | 0.0000 | No |
| 32692 | Gm8394 | 0.0000 | No |
| 32693 | Gm8396 | 0.0000 | No |
| 32694 | Gm8398 | 0.0000 | No |
| 32695 | Gm8399 | 0.0000 | No |
| 32696 | Gm8401 | 0.0000 | No |
| 32697 | Gm8402 | 0.0000 | No |
| 32698 | Gm8403 | 0.0000 | No |
| 32699 | Gm8407 | 0.0000 | No |
| 32700 | Gm8410 | 0.0000 | No |
| 32701 | Gm8412 | 0.0000 | No |
| 32702 | Gm8419 | 0.0000 | No |
| 32703 | Gm8420 | 0.0000 | No |

|       |        |        |    |
|-------|--------|--------|----|
| 32704 | Gm8421 | 0.0000 | No |
| 32705 | Gm8423 | 0.0000 | No |
| 32706 | Gm8424 | 0.0000 | No |
| 32707 | Gm8425 | 0.0000 | No |
| 32708 | Gm8428 | 0.0000 | No |
| 32709 | Gm8430 | 0.0000 | No |
| 32710 | Gm8436 | 0.0000 | No |
| 32711 | Gm8439 | 0.0000 | No |
| 32712 | Gm8444 | 0.0000 | No |
| 32713 | Gm8446 | 0.0000 | No |
| 32714 | Gm8449 | 0.0000 | No |
| 32715 | Gm8451 | 0.0000 | No |
| 32716 | Gm8453 | 0.0000 | No |
| 32717 | Gm8454 | 0.0000 | No |
| 32718 | Gm8458 | 0.0000 | No |
| 32719 | Gm8463 | 0.0000 | No |
| 32720 | Gm8464 | 0.0000 | No |
| 32721 | Gm8473 | 0.0000 | No |
| 32722 | Gm8475 | 0.0000 | No |
| 32723 | Gm8479 | 0.0000 | No |
| 32724 | Gm8480 | 0.0000 | No |
| 32725 | Gm8482 | 0.0000 | No |
| 32726 | Gm8486 | 0.0000 | No |
| 32727 | Gm8488 | 0.0000 | No |
| 32728 | Gm8489 | 0.0000 | No |
| 32729 | Gm8492 | 0.0000 | No |
| 32730 | Gm8493 | 0.0000 | No |
| 32731 | Gm8494 | 0.0000 | No |
| 32732 | Gm8495 | 0.0000 | No |
| 32733 | Gm8498 | 0.0000 | No |
| 32734 | Gm8501 | 0.0000 | No |
| 32735 | Gm8502 | 0.0000 | No |
| 32736 | Gm8503 | 0.0000 | No |
| 32737 | Gm8506 | 0.0000 | No |
| 32738 | Gm8508 | 0.0000 | No |
| 32739 | Gm8510 | 0.0000 | No |
| 32740 | Gm8513 | 0.0000 | No |
| 32741 | Gm8515 | 0.0000 | No |
| 32742 | Gm8520 | 0.0000 | No |
| 32743 | Gm8521 | 0.0000 | No |
| 32744 | Gm8522 | 0.0000 | No |
| 32745 | Gm8523 | 0.0000 | No |
| 32746 | Gm8524 | 0.0000 | No |
| 32747 | Gm8525 | 0.0000 | No |
| 32748 | Gm8526 | 0.0000 | No |
| 32749 | Gm8529 | 0.0000 | No |



|       |        |        |    |
|-------|--------|--------|----|
| 32750 | Gm853  | 0.0000 | No |
| 32751 | Gm8531 | 0.0000 | No |
| 32752 | Gm8532 | 0.0000 | No |
| 32753 | Gm8534 | 0.0000 | No |
| 32754 | Gm8539 | 0.0000 | No |
| 32755 | Gm8545 | 0.0000 | No |
| 32756 | Gm8546 | 0.0000 | No |
| 32757 | Gm8556 | 0.0000 | No |
| 32758 | Gm8565 | 0.0000 | No |
| 32759 | Gm8566 | 0.0000 | No |
| 32760 | Gm8569 | 0.0000 | No |
| 32761 | Gm8574 | 0.0000 | No |
| 32762 | Gm8575 | 0.0000 | No |
| 32763 | Gm8577 | 0.0000 | No |
| 32764 | Gm8579 | 0.0000 | No |
| 32765 | Gm8581 | 0.0000 | No |
| 32766 | Gm8584 | 0.0000 | No |
| 32767 | Gm8595 | 0.0000 | No |
| 32768 | Gm8599 | 0.0000 | No |
| 32769 | Gm8600 | 0.0000 | No |
| 32770 | Gm8601 | 0.0000 | No |
| 32771 | Gm8602 | 0.0000 | No |
| 32772 | Gm8603 | 0.0000 | No |
| 32773 | Gm8604 | 0.0000 | No |
| 32774 | Gm8606 | 0.0000 | No |
| 32775 | Gm8609 | 0.0000 | No |
| 32776 | Gm8614 | 0.0000 | No |
| 32777 | Gm8615 | 0.0000 | No |
| 32778 | Gm8617 | 0.0000 | No |
| 32779 | Gm8618 | 0.0000 | No |
| 32780 | Gm8623 | 0.0000 | No |
| 32781 | Gm8624 | 0.0000 | No |
| 32782 | Gm8625 | 0.0000 | No |
| 32783 | Gm8641 | 0.0000 | No |
| 32784 | Gm8643 | 0.0000 | No |
| 32785 | Gm8644 | 0.0000 | No |
| 32786 | Gm8648 | 0.0000 | No |
| 32787 | Gm8649 | 0.0000 | No |
| 32788 | Gm8652 | 0.0000 | No |
| 32789 | Gm8653 | 0.0000 | No |
| 32790 | Gm8659 | 0.0000 | No |
| 32791 | Gm8660 | 0.0000 | No |
| 32792 | Gm8661 | 0.0000 | No |
| 32793 | Gm8662 | 0.0000 | No |
| 32794 | Gm8666 | 0.0000 | No |
| 32795 | Gm8667 | 0.0000 | No |

|       |        |        |    |
|-------|--------|--------|----|
| 32796 | Gm8668 | 0.0000 | No |
| 32797 | Gm8669 | 0.0000 | No |
| 32798 | Gm8674 | 0.0000 | No |
| 32799 | Gm8677 | 0.0000 | No |
| 32800 | Gm8679 | 0.0000 | No |
| 32801 | Gm8682 | 0.0000 | No |
| 32802 | Gm8685 | 0.0000 | No |
| 32803 | Gm8686 | 0.0000 | No |
| 32804 | Gm8688 | 0.0000 | No |
| 32805 | Gm8692 | 0.0000 | No |
| 32806 | Gm8693 | 0.0000 | No |
| 32807 | Gm8696 | 0.0000 | No |
| 32808 | Gm8701 | 0.0000 | No |
| 32809 | Gm8703 | 0.0000 | No |
| 32810 | Gm8704 | 0.0000 | No |
| 32811 | Gm8706 | 0.0000 | No |
| 32812 | Gm8707 | 0.0000 | No |
| 32813 | Gm8708 | 0.0000 | No |
| 32814 | Gm8709 | 0.0000 | No |
| 32815 | Gm8711 | 0.0000 | No |
| 32816 | Gm8719 | 0.0000 | No |
| 32817 | Gm8720 | 0.0000 | No |
| 32818 | Gm8722 | 0.0000 | No |
| 32819 | Gm8723 | 0.0000 | No |
| 32820 | Gm8724 | 0.0000 | No |
| 32821 | Gm8728 | 0.0000 | No |
| 32822 | Gm8730 | 0.0000 | No |
| 32823 | Gm8731 | 0.0000 | No |
| 32824 | Gm8734 | 0.0000 | No |
| 32825 | Gm8737 | 0.0000 | No |
| 32826 | Gm8738 | 0.0000 | No |
| 32827 | Gm8739 | 0.0000 | No |
| 32828 | Gm8741 | 0.0000 | No |
| 32829 | Gm8747 | 0.0000 | No |
| 32830 | Gm8749 | 0.0000 | No |
| 32831 | Gm8754 | 0.0000 | No |
| 32832 | Gm8756 | 0.0000 | No |
| 32833 | Gm8757 | 0.0000 | No |
| 32834 | Gm8761 | 0.0000 | No |
| 32835 | Gm8762 | 0.0000 | No |
| 32836 | Gm8764 | 0.0000 | No |
| 32837 | Gm8765 | 0.0000 | No |
| 32838 | Gm8770 | 0.0000 | No |
| 32839 | Gm8773 | 0.0000 | No |
| 32840 | Gm8778 | 0.0000 | No |
| 32841 | Gm8783 | 0.0000 | No |

|       |        |        |    |
|-------|--------|--------|----|
| 32842 | Gm8790 | 0.0000 | No |
| 32843 | Gm8793 | 0.0000 | No |
| 32844 | Gm8797 | 0.0000 | No |
| 32845 | Gm8801 | 0.0000 | No |
| 32846 | Gm8802 | 0.0000 | No |
| 32847 | Gm8805 | 0.0000 | No |
| 32848 | Gm8806 | 0.0000 | No |
| 32849 | Gm8807 | 0.0000 | No |
| 32850 | Gm8809 | 0.0000 | No |
| 32851 | Gm8810 | 0.0000 | No |
| 32852 | Gm8813 | 0.0000 | No |
| 32853 | Gm8814 | 0.0000 | No |
| 32854 | Gm8815 | 0.0000 | No |
| 32855 | Gm8816 | 0.0000 | No |
| 32856 | Gm8817 | 0.0000 | No |
| 32857 | Gm8818 | 0.0000 | No |
| 32858 | Gm8820 | 0.0000 | No |
| 32859 | Gm8822 | 0.0000 | No |
| 32860 | Gm8824 | 0.0000 | No |
| 32861 | Gm8825 | 0.0000 | No |
| 32862 | Gm8828 | 0.0000 | No |
| 32863 | Gm8832 | 0.0000 | No |
| 32864 | Gm8835 | 0.0000 | No |
| 32865 | Gm8836 | 0.0000 | No |
| 32866 | Gm8839 | 0.0000 | No |
| 32867 | Gm8840 | 0.0000 | No |
| 32868 | Gm8844 | 0.0000 | No |
| 32869 | Gm8849 | 0.0000 | No |
| 32870 | Gm8850 | 0.0000 | No |
| 32871 | Gm8855 | 0.0000 | No |
| 32872 | Gm8856 | 0.0000 | No |
| 32873 | Gm8857 | 0.0000 | No |
| 32874 | Gm8858 | 0.0000 | No |
| 32875 | Gm8860 | 0.0000 | No |
| 32876 | Gm8861 | 0.0000 | No |
| 32877 | Gm8862 | 0.0000 | No |
| 32878 | Gm8864 | 0.0000 | No |
| 32879 | Gm8868 | 0.0000 | No |
| 32880 | Gm8869 | 0.0000 | No |
| 32881 | Gm8870 | 0.0000 | No |
| 32882 | Gm8871 | 0.0000 | No |
| 32883 | Gm8872 | 0.0000 | No |
| 32884 | Gm8874 | 0.0000 | No |
| 32885 | Gm8876 | 0.0000 | No |
| 32886 | Gm8877 | 0.0000 | No |
| 32887 | Gm8878 | 0.0000 | No |

|       |        |        |    |
|-------|--------|--------|----|
| 32888 | Gm8879 | 0.0000 | No |
| 32889 | Gm8880 | 0.0000 | No |
| 32890 | Gm8882 | 0.0000 | No |
| 32891 | Gm8883 | 0.0000 | No |
| 32892 | Gm8885 | 0.0000 | No |
| 32893 | Gm8888 | 0.0000 | No |
| 32894 | Gm8893 | 0.0000 | No |
| 32895 | Gm8894 | 0.0000 | No |
| 32896 | Gm8895 | 0.0000 | No |
| 32897 | Gm8896 | 0.0000 | No |
| 32898 | Gm8897 | 0.0000 | No |
| 32899 | Gm8902 | 0.0000 | No |
| 32900 | Gm8906 | 0.0000 | No |
| 32901 | Gm8908 | 0.0000 | No |
| 32902 | Gm8909 | 0.0000 | No |
| 32903 | Gm8913 | 0.0000 | No |
| 32904 | Gm8914 | 0.0000 | No |
| 32905 | Gm8916 | 0.0000 | No |
| 32906 | Gm8918 | 0.0000 | No |
| 32907 | Gm8920 | 0.0000 | No |
| 32908 | Gm8921 | 0.0000 | No |
| 32909 | Gm8922 | 0.0000 | No |
| 32910 | Gm8924 | 0.0000 | No |
| 32911 | Gm8925 | 0.0000 | No |
| 32912 | Gm8926 | 0.0000 | No |
| 32913 | Gm8927 | 0.0000 | No |
| 32914 | Gm8929 | 0.0000 | No |
| 32915 | Gm8930 | 0.0000 | No |
| 32916 | Gm8935 | 0.0000 | No |
| 32917 | Gm8941 | 0.0000 | No |
| 32918 | Gm8952 | 0.0000 | No |
| 32919 | Gm8953 | 0.0000 | No |
| 32920 | Gm8955 | 0.0000 | No |
| 32921 | Gm8956 | 0.0000 | No |
| 32922 | Gm8957 | 0.0000 | No |
| 32923 | Gm8964 | 0.0000 | No |
| 32924 | Gm8968 | 0.0000 | No |
| 32925 | Gm8973 | 0.0000 | No |
| 32926 | Gm8974 | 0.0000 | No |
| 32927 | Gm8976 | 0.0000 | No |
| 32928 | Gm8978 | 0.0000 | No |
| 32929 | Gm8979 | 0.0000 | No |
| 32930 | Gm8980 | 0.0000 | No |
| 32931 | Gm8982 | 0.0000 | No |
| 32932 | Gm8984 | 0.0000 | No |
| 32933 | Gm8988 | 0.0000 | No |

|       |        |        |    |
|-------|--------|--------|----|
| 32934 | Gm8989 | 0.0000 | No |
| 32935 | Gm8993 | 0.0000 | No |
| 32936 | Gm8994 | 0.0000 | No |
| 32937 | Gm8995 | 0.0000 | No |
| 32938 | Gm9    | 0.0000 | No |
| 32939 | Gm9001 | 0.0000 | No |
| 32940 | Gm9002 | 0.0000 | No |
| 32941 | Gm9003 | 0.0000 | No |
| 32942 | Gm9006 | 0.0000 | No |
| 32943 | Gm9008 | 0.0000 | No |
| 32944 | Gm9013 | 0.0000 | No |
| 32945 | Gm9017 | 0.0000 | No |
| 32946 | Gm9022 | 0.0000 | No |
| 32947 | Gm9027 | 0.0000 | No |
| 32948 | Gm9034 | 0.0000 | No |
| 32949 | Gm9038 | 0.0000 | No |
| 32950 | Gm9040 | 0.0000 | No |
| 32951 | Gm9043 | 0.0000 | No |
| 32952 | Gm9044 | 0.0000 | No |
| 32953 | Gm9045 | 0.0000 | No |
| 32954 | Gm9046 | 0.0000 | No |
| 32955 | Gm9047 | 0.0000 | No |
| 32956 | Gm9048 | 0.0000 | No |
| 32957 | Gm9049 | 0.0000 | No |
| 32958 | Gm9050 | 0.0000 | No |
| 32959 | Gm9051 | 0.0000 | No |
| 32960 | Gm9057 | 0.0000 | No |
| 32961 | Gm9059 | 0.0000 | No |
| 32962 | Gm906  | 0.0000 | No |
| 32963 | Gm9060 | 0.0000 | No |
| 32964 | Gm9061 | 0.0000 | No |
| 32965 | Gm9062 | 0.0000 | No |
| 32966 | Gm9064 | 0.0000 | No |
| 32967 | Gm9071 | 0.0000 | No |
| 32968 | Gm9075 | 0.0000 | No |
| 32969 | Gm9077 | 0.0000 | No |
| 32970 | Gm9078 | 0.0000 | No |
| 32971 | Gm9081 | 0.0000 | No |
| 32972 | Gm9083 | 0.0000 | No |
| 32973 | Gm9085 | 0.0000 | No |
| 32974 | Gm9089 | 0.0000 | No |
| 32975 | Gm9095 | 0.0000 | No |
| 32976 | Gm9097 | 0.0000 | No |
| 32977 | Gm9103 | 0.0000 | No |
| 32978 | Gm9104 | 0.0000 | No |
| 32979 | Gm9105 | 0.0000 | No |

|       |        |        |    |
|-------|--------|--------|----|
| 32980 | Gm9112 | 0.0000 | No |
| 32981 | Gm9113 | 0.0000 | No |
| 32982 | Gm9114 | 0.0000 | No |
| 32983 | Gm9116 | 0.0000 | No |
| 32984 | Gm9117 | 0.0000 | No |
| 32985 | Gm9119 | 0.0000 | No |
| 32986 | Gm9120 | 0.0000 | No |
| 32987 | Gm9121 | 0.0000 | No |
| 32988 | Gm9124 | 0.0000 | No |
| 32989 | Gm9125 | 0.0000 | No |
| 32990 | Gm9126 | 0.0000 | No |
| 32991 | Gm9127 | 0.0000 | No |
| 32992 | Gm9131 | 0.0000 | No |
| 32993 | Gm9132 | 0.0000 | No |
| 32994 | Gm9133 | 0.0000 | No |
| 32995 | Gm9134 | 0.0000 | No |
| 32996 | Gm9135 | 0.0000 | No |
| 32997 | Gm9136 | 0.0000 | No |
| 32998 | Gm9141 | 0.0000 | No |
| 32999 | Gm9142 | 0.0000 | No |
| 33000 | Gm9143 | 0.0000 | No |
| 33001 | Gm9144 | 0.0000 | No |
| 33002 | Gm9149 | 0.0000 | No |
| 33003 | Gm9156 | 0.0000 | No |
| 33004 | Gm9157 | 0.0000 | No |
| 33005 | Gm9162 | 0.0000 | No |
| 33006 | Gm9164 | 0.0000 | No |
| 33007 | Gm9166 | 0.0000 | No |
| 33008 | Gm9169 | 0.0000 | No |
| 33009 | Gm9173 | 0.0000 | No |
| 33010 | Gm9174 | 0.0000 | No |
| 33011 | Gm9192 | 0.0000 | No |
| 33012 | Gm9195 | 0.0000 | No |
| 33013 | Gm9200 | 0.0000 | No |
| 33014 | Gm9207 | 0.0000 | No |
| 33015 | Gm9208 | 0.0000 | No |
| 33016 | Gm9211 | 0.0000 | No |
| 33017 | Gm9220 | 0.0000 | No |
| 33018 | Gm9225 | 0.0000 | No |
| 33019 | Gm9226 | 0.0000 | No |
| 33020 | Gm9227 | 0.0000 | No |
| 33021 | Gm9230 | 0.0000 | No |
| 33022 | Gm9234 | 0.0000 | No |
| 33023 | Gm9236 | 0.0000 | No |
| 33024 | Gm9239 | 0.0000 | No |
| 33025 | Gm9240 | 0.0000 | No |

|       |        |        |    |
|-------|--------|--------|----|
| 33026 | Gm9244 | 0.0000 | No |
| 33027 | Gm9245 | 0.0000 | No |
| 33028 | Gm9246 | 0.0000 | No |
| 33029 | Gm9251 | 0.0000 | No |
| 33030 | Gm9252 | 0.0000 | No |
| 33031 | Gm9256 | 0.0000 | No |
| 33032 | Gm9257 | 0.0000 | No |
| 33033 | Gm9260 | 0.0000 | No |
| 33034 | Gm9268 | 0.0000 | No |
| 33035 | Gm9271 | 0.0000 | No |
| 33036 | Gm9278 | 0.0000 | No |
| 33037 | Gm9285 | 0.0000 | No |
| 33038 | Gm9286 | 0.0000 | No |
| 33039 | Gm9294 | 0.0000 | No |
| 33040 | Gm9299 | 0.0000 | No |
| 33041 | Gm9308 | 0.0000 | No |
| 33042 | Gm9311 | 0.0000 | No |
| 33043 | Gm9312 | 0.0000 | No |
| 33044 | Gm9314 | 0.0000 | No |
| 33045 | Gm9320 | 0.0000 | No |
| 33046 | Gm9322 | 0.0000 | No |
| 33047 | Gm933  | 0.0000 | No |
| 33048 | Gm9333 | 0.0000 | No |
| 33049 | Gm9341 | 0.0000 | No |
| 33050 | Gm9343 | 0.0000 | No |
| 33051 | Gm9353 | 0.0000 | No |
| 33052 | Gm9354 | 0.0000 | No |
| 33053 | Gm9358 | 0.0000 | No |
| 33054 | Gm9359 | 0.0000 | No |
| 33055 | Gm9361 | 0.0000 | No |
| 33056 | Gm9364 | 0.0000 | No |
| 33057 | Gm9367 | 0.0000 | No |
| 33058 | Gm9369 | 0.0000 | No |
| 33059 | Gm9372 | 0.0000 | No |
| 33060 | Gm9373 | 0.0000 | No |
| 33061 | Gm9376 | 0.0000 | No |
| 33062 | Gm9377 | 0.0000 | No |
| 33063 | Gm9378 | 0.0000 | No |
| 33064 | Gm9379 | 0.0000 | No |
| 33065 | Gm9381 | 0.0000 | No |
| 33066 | Gm9385 | 0.0000 | No |
| 33067 | Gm9386 | 0.0000 | No |
| 33068 | Gm9387 | 0.0000 | No |
| 33069 | Gm9392 | 0.0000 | No |
| 33070 | Gm9396 | 0.0000 | No |
| 33071 | Gm9399 | 0.0000 | No |

|       |        |        |    |
|-------|--------|--------|----|
| 33072 | Gm9402 | 0.0000 | No |
| 33073 | Gm9403 | 0.0000 | No |
| 33074 | Gm9408 | 0.0000 | No |
| 33075 | Gm9415 | 0.0000 | No |
| 33076 | Gm9419 | 0.0000 | No |
| 33077 | Gm9423 | 0.0000 | No |
| 33078 | Gm9427 | 0.0000 | No |
| 33079 | Gm9428 | 0.0000 | No |
| 33080 | Gm9430 | 0.0000 | No |
| 33081 | Gm9431 | 0.0000 | No |
| 33082 | Gm9432 | 0.0000 | No |
| 33083 | Gm9435 | 0.0000 | No |
| 33084 | Gm9436 | 0.0000 | No |
| 33085 | Gm9439 | 0.0000 | No |
| 33086 | Gm9440 | 0.0000 | No |
| 33087 | Gm9442 | 0.0000 | No |
| 33088 | Gm9443 | 0.0000 | No |
| 33089 | Gm9449 | 0.0000 | No |
| 33090 | Gm9451 | 0.0000 | No |
| 33091 | Gm9457 | 0.0000 | No |
| 33092 | Gm9458 | 0.0000 | No |
| 33093 | Gm9463 | 0.0000 | No |
| 33094 | Gm9476 | 0.0000 | No |
| 33095 | Gm9480 | 0.0000 | No |
| 33096 | Gm9484 | 0.0000 | No |
| 33097 | Gm9493 | 0.0000 | No |
| 33098 | Gm9495 | 0.0000 | No |
| 33099 | Gm9496 | 0.0000 | No |
| 33100 | Gm9497 | 0.0000 | No |
| 33101 | Gm9498 | 0.0000 | No |
| 33102 | Gm9499 | 0.0000 | No |
| 33103 | Gm9504 | 0.0000 | No |
| 33104 | Gm9506 | 0.0000 | No |
| 33105 | Gm9507 | 0.0000 | No |
| 33106 | Gm9513 | 0.0000 | No |
| 33107 | Gm9515 | 0.0000 | No |
| 33108 | Gm9516 | 0.0000 | No |
| 33109 | Gm9517 | 0.0000 | No |
| 33110 | Gm9519 | 0.0000 | No |
| 33111 | Gm9520 | 0.0000 | No |
| 33112 | Gm9521 | 0.0000 | No |
| 33113 | Gm9522 | 0.0000 | No |
| 33114 | Gm9523 | 0.0000 | No |
| 33115 | Gm9529 | 0.0000 | No |
| 33116 | Gm9530 | 0.0000 | No |
| 33117 | Gm9531 | 0.0000 | No |



|       |        |        |    |
|-------|--------|--------|----|
| 33118 | Gm9540 | 0.0000 | No |
| 33119 | Gm9541 | 0.0000 | No |
| 33120 | Gm9550 | 0.0000 | No |
| 33121 | Gm9555 | 0.0000 | No |
| 33122 | Gm9556 | 0.0000 | No |
| 33123 | Gm9560 | 0.0000 | No |
| 33124 | Gm9568 | 0.0000 | No |
| 33125 | Gm9569 | 0.0000 | No |
| 33126 | Gm9574 | 0.0000 | No |
| 33127 | Gm9575 | 0.0000 | No |
| 33128 | Gm9578 | 0.0000 | No |
| 33129 | Gm9587 | 0.0000 | No |
| 33130 | Gm9593 | 0.0000 | No |
| 33131 | Gm9597 | 0.0000 | No |
| 33132 | Gm9599 | 0.0000 | No |
| 33133 | Gm960  | 0.0000 | No |
| 33134 | Gm9602 | 0.0000 | No |
| 33135 | Gm9603 | 0.0000 | No |
| 33136 | Gm9604 | 0.0000 | No |
| 33137 | Gm9611 | 0.0000 | No |
| 33138 | Gm9613 | 0.0000 | No |
| 33139 | Gm9619 | 0.0000 | No |
| 33140 | Gm9621 | 0.0000 | No |
| 33141 | Gm9625 | 0.0000 | No |
| 33142 | Gm9630 | 0.0000 | No |
| 33143 | Gm9632 | 0.0000 | No |
| 33144 | Gm9637 | 0.0000 | No |
| 33145 | Gm9645 | 0.0000 | No |
| 33146 | Gm9652 | 0.0000 | No |
| 33147 | Gm9655 | 0.0000 | No |
| 33148 | Gm9658 | 0.0000 | No |
| 33149 | Gm9670 | 0.0000 | No |
| 33150 | Gm9671 | 0.0000 | No |
| 33151 | Gm9672 | 0.0000 | No |
| 33152 | Gm9673 | 0.0000 | No |
| 33153 | Gm9678 | 0.0000 | No |
| 33154 | Gm9682 | 0.0000 | No |
| 33155 | Gm9685 | 0.0000 | No |
| 33156 | Gm9687 | 0.0000 | No |
| 33157 | Gm9689 | 0.0000 | No |
| 33158 | Gm9694 | 0.0000 | No |
| 33159 | Gm9696 | 0.0000 | No |
| 33160 | Gm9700 | 0.0000 | No |
| 33161 | Gm9701 | 0.0000 | No |
| 33162 | Gm9703 | 0.0000 | No |
| 33163 | Gm9710 | 0.0000 | No |

|       |        |        |    |
|-------|--------|--------|----|
| 33164 | Gm9711 | 0.0000 | No |
| 33165 | Gm9719 | 0.0000 | No |
| 33166 | Gm9722 | 0.0000 | No |
| 33167 | Gm9723 | 0.0000 | No |
| 33168 | Gm9725 | 0.0000 | No |
| 33169 | Gm9726 | 0.0000 | No |
| 33170 | Gm9727 | 0.0000 | No |
| 33171 | Gm9728 | 0.0000 | No |
| 33172 | Gm9729 | 0.0000 | No |
| 33173 | Gm973  | 0.0000 | No |
| 33174 | Gm9732 | 0.0000 | No |
| 33175 | Gm9733 | 0.0000 | No |
| 33176 | Gm9742 | 0.0000 | No |
| 33177 | Gm9745 | 0.0000 | No |
| 33178 | Gm9747 | 0.0000 | No |
| 33179 | Gm9748 | 0.0000 | No |
| 33180 | Gm9750 | 0.0000 | No |
| 33181 | Gm9752 | 0.0000 | No |
| 33182 | Gm9754 | 0.0000 | No |
| 33183 | Gm9755 | 0.0000 | No |
| 33184 | Gm9758 | 0.0000 | No |
| 33185 | Gm9761 | 0.0000 | No |
| 33186 | Gm9762 | 0.0000 | No |
| 33187 | Gm9765 | 0.0000 | No |
| 33188 | Gm9768 | 0.0000 | No |
| 33189 | Gm9769 | 0.0000 | No |
| 33190 | Gm9770 | 0.0000 | No |
| 33191 | Gm9774 | 0.0000 | No |
| 33192 | Gm9775 | 0.0000 | No |
| 33193 | Gm9776 | 0.0000 | No |
| 33194 | Gm9780 | 0.0000 | No |
| 33195 | Gm9785 | 0.0000 | No |
| 33196 | Gm9788 | 0.0000 | No |
| 33197 | Gm9789 | 0.0000 | No |
| 33198 | Gm9790 | 0.0000 | No |
| 33199 | Gm9794 | 0.0000 | No |
| 33200 | Gm9795 | 0.0000 | No |
| 33201 | Gm9796 | 0.0000 | No |
| 33202 | Gm9797 | 0.0000 | No |
| 33203 | Gm9800 | 0.0000 | No |
| 33204 | Gm9801 | 0.0000 | No |
| 33205 | Gm9803 | 0.0000 | No |
| 33206 | Gm9804 | 0.0000 | No |
| 33207 | Gm9805 | 0.0000 | No |
| 33208 | Gm9806 | 0.0000 | No |
| 33209 | Gm9812 | 0.0000 | No |

|       |        |        |    |
|-------|--------|--------|----|
| 33210 | Gm9816 | 0.0000 | No |
| 33211 | Gm9818 | 0.0000 | No |
| 33212 | Gm9821 | 0.0000 | No |
| 33213 | Gm9823 | 0.0000 | No |
| 33214 | Gm9824 | 0.0000 | No |
| 33215 | Gm9825 | 0.0000 | No |
| 33216 | Gm9826 | 0.0000 | No |
| 33217 | Gm9828 | 0.0000 | No |
| 33218 | Gm9830 | 0.0000 | No |
| 33219 | Gm9833 | 0.0000 | No |
| 33220 | Gm9835 | 0.0000 | No |
| 33221 | Gm9836 | 0.0000 | No |
| 33222 | Gm9837 | 0.0000 | No |
| 33223 | Gm9840 | 0.0000 | No |
| 33224 | Gm9843 | 0.0000 | No |
| 33225 | Gm9844 | 0.0000 | No |
| 33226 | Gm9845 | 0.0000 | No |
| 33227 | Gm9847 | 0.0000 | No |
| 33228 | Gm9848 | 0.0000 | No |
| 33229 | Gm9850 | 0.0000 | No |
| 33230 | Gm9857 | 0.0000 | No |
| 33231 | Gm9860 | 0.0000 | No |
| 33232 | Gm9864 | 0.0000 | No |
| 33233 | Gm9866 | 0.0000 | No |
| 33234 | Gm9867 | 0.0000 | No |
| 33235 | Gm9869 | 0.0000 | No |
| 33236 | Gm9871 | 0.0000 | No |
| 33237 | Gm9873 | 0.0000 | No |
| 33238 | Gm9874 | 0.0000 | No |
| 33239 | Gm9877 | 0.0000 | No |
| 33240 | Gm9881 | 0.0000 | No |
| 33241 | Gm9885 | 0.0000 | No |
| 33242 | Gm9887 | 0.0000 | No |
| 33243 | Gm9888 | 0.0000 | No |
| 33244 | Gm9890 | 0.0000 | No |
| 33245 | Gm9892 | 0.0000 | No |
| 33246 | Gm9894 | 0.0000 | No |
| 33247 | Gm9899 | 0.0000 | No |
| 33248 | Gm9903 | 0.0000 | No |
| 33249 | Gm9911 | 0.0000 | No |
| 33250 | Gm9913 | 0.0000 | No |
| 33251 | Gm9915 | 0.0000 | No |
| 33252 | Gm9916 | 0.0000 | No |
| 33253 | Gm9917 | 0.0000 | No |
| 33254 | Gm9918 | 0.0000 | No |
| 33255 | Gm9919 | 0.0000 | No |

|       |        |        |    |
|-------|--------|--------|----|
| 33256 | Gm9920 | 0.0000 | No |
| 33257 | Gm9921 | 0.0000 | No |
| 33258 | Gm9924 | 0.0000 | No |
| 33259 | Gm9925 | 0.0000 | No |
| 33260 | Gm9929 | 0.0000 | No |
| 33261 | Gm9930 | 0.0000 | No |
| 33262 | Gm9931 | 0.0000 | No |
| 33263 | Gm9932 | 0.0000 | No |
| 33264 | Gm9934 | 0.0000 | No |
| 33265 | Gm9936 | 0.0000 | No |
| 33266 | Gm9938 | 0.0000 | No |
| 33267 | Gm9939 | 0.0000 | No |
| 33268 | Gm9944 | 0.0000 | No |
| 33269 | Gm9945 | 0.0000 | No |
| 33270 | Gm9946 | 0.0000 | No |
| 33271 | Gm9947 | 0.0000 | No |
| 33272 | Gm9949 | 0.0000 | No |
| 33273 | Gm9954 | 0.0000 | No |
| 33274 | Gm9955 | 0.0000 | No |
| 33275 | Gm9956 | 0.0000 | No |
| 33276 | Gm9958 | 0.0000 | No |
| 33277 | Gm9959 | 0.0000 | No |
| 33278 | Gm9961 | 0.0000 | No |
| 33279 | Gm9962 | 0.0000 | No |
| 33280 | Gm9964 | 0.0000 | No |
| 33281 | Gm9967 | 0.0000 | No |
| 33282 | Gm9968 | 0.0000 | No |
| 33283 | Gm9970 | 0.0000 | No |
| 33284 | Gm9972 | 0.0000 | No |
| 33285 | Gm9974 | 0.0000 | No |
| 33286 | Gm9978 | 0.0000 | No |
| 33287 | Gm9979 | 0.0000 | No |
| 33288 | Gm9985 | 0.0000 | No |
| 33289 | Gm9987 | 0.0000 | No |
| 33290 | Gm9988 | 0.0000 | No |
| 33291 | Gm9989 | 0.0000 | No |
| 33292 | Gm9991 | 0.0000 | No |
| 33293 | Gm9992 | 0.0000 | No |
| 33294 | Gm9996 | 0.0000 | No |
| 33295 | Gm9999 | 0.0000 | No |
| 33296 | Gmcl1  | 0.0000 | No |
| 33297 | Gmcl11 | 0.0000 | No |
| 33298 | Gmcls  | 0.0000 | No |
| 33299 | Gmcb1  | 0.0000 | No |
| 33300 | Gmcb2  | 0.0000 | No |
| 33301 | Gmfb   | 0.0000 | No |

|       |       |        |    |
|-------|-------|--------|----|
| 33302 | Gmfg  | 0.0000 | No |
| 33303 | Gml   | 0.0000 | No |
| 33304 | Gmnc  | 0.0000 | No |
| 33305 | Gmnn  | 0.0000 | No |
| 33306 | Gmppa | 0.0000 | No |
| 33307 | Gmppb | 0.0000 | No |
| 33308 | Gmpr  | 0.0000 | No |
| 33309 | Gmpr2 | 0.0000 | No |
| 33310 | Gmps  | 0.0000 | No |
| 33311 | Gna11 | 0.0000 | No |
| 33312 | Gna12 | 0.0000 | No |
| 33313 | Gna13 | 0.0000 | No |
| 33314 | Gna14 | 0.0000 | No |
| 33315 | Gna15 | 0.0000 | No |
| 33316 | Gnai2 | 0.0000 | No |
| 33317 | Gnai3 | 0.0000 | No |
| 33318 | Gnal  | 0.0000 | No |
| 33319 | Gnaq  | 0.0000 | No |
| 33320 | Gnas  | 0.0000 | No |
| 33321 | Gnat1 | 0.0000 | No |
| 33322 | Gnat2 | 0.0000 | No |
| 33323 | Gnaz  | 0.0000 | No |
| 33324 | Gnb1  | 0.0000 | No |
| 33325 | Gnb11 | 0.0000 | No |
| 33326 | Gnb2  | 0.0000 | No |
| 33327 | Gnb3  | 0.0000 | No |
| 33328 | Gnb4  | 0.0000 | No |
| 33329 | Gne   | 0.0000 | No |
| 33330 | Gng10 | 0.0000 | No |
| 33331 | Gng11 | 0.0000 | No |
| 33332 | Gng12 | 0.0000 | No |
| 33333 | Gng13 | 0.0000 | No |
| 33334 | Gng2  | 0.0000 | No |
| 33335 | Gng3  | 0.0000 | No |
| 33336 | Gng4  | 0.0000 | No |
| 33337 | Gng5  | 0.0000 | No |
| 33338 | Gng7  | 0.0000 | No |
| 33339 | Gng8  | 0.0000 | No |
| 33340 | Gngt1 | 0.0000 | No |
| 33341 | Gngt2 | 0.0000 | No |
| 33342 | Gnl1  | 0.0000 | No |
| 33343 | Gnl2  | 0.0000 | No |
| 33344 | Gnl3  | 0.0000 | No |
| 33345 | Gnl31 | 0.0000 | No |
| 33346 | Gnmt  | 0.0000 | No |
| 33347 | Gnpat | 0.0000 | No |

|       |          |        |    |
|-------|----------|--------|----|
| 33348 | Gnpda1   | 0.0000 | No |
| 33349 | Gnpda2   | 0.0000 | No |
| 33350 | Gnpnat1  | 0.0000 | No |
| 33351 | Gnptab   | 0.0000 | No |
| 33352 | Gnptg    | 0.0000 | No |
| 33353 | Gnrh1    | 0.0000 | No |
| 33354 | Gnrhr    | 0.0000 | No |
| 33355 | Gns      | 0.0000 | No |
| 33356 | Golga1   | 0.0000 | No |
| 33357 | Golga2   | 0.0000 | No |
| 33358 | Golga3   | 0.0000 | No |
| 33359 | Golga4   | 0.0000 | No |
| 33360 | Golga5   | 0.0000 | No |
| 33361 | Golga7   | 0.0000 | No |
| 33362 | Golga7b  | 0.0000 | No |
| 33363 | Golgb1   | 0.0000 | No |
| 33364 | Golim4   | 0.0000 | No |
| 33365 | Golm1    | 0.0000 | No |
| 33366 | Golph3   | 0.0000 | No |
| 33367 | Golph3l  | 0.0000 | No |
| 33368 | Golt1a   | 0.0000 | No |
| 33369 | Golt1b   | 0.0000 | No |
| 33370 | Gopc     | 0.0000 | No |
| 33371 | Gorab    | 0.0000 | No |
| 33372 | Gorasp1  | 0.0000 | No |
| 33373 | Gorasp2  | 0.0000 | No |
| 33374 | Gosr1    | 0.0000 | No |
| 33375 | Gosr2    | 0.0000 | No |
| 33376 | Got1     | 0.0000 | No |
| 33377 | Got2     | 0.0000 | No |
| 33378 | Got2-ps1 | 0.0000 | No |
| 33379 | Gp1ba    | 0.0000 | No |
| 33380 | Gp2      | 0.0000 | No |
| 33381 | Gp5      | 0.0000 | No |
| 33382 | Gp6      | 0.0000 | No |
| 33383 | Gp9      | 0.0000 | No |
| 33384 | Gpaa1    | 0.0000 | No |
| 33385 | Gpalpp1  | 0.0000 | No |
| 33386 | Gpam     | 0.0000 | No |
| 33387 | Gpank1   | 0.0000 | No |
| 33388 | Gpat2    | 0.0000 | No |
| 33389 | Gpat4    | 0.0000 | No |
| 33390 | Gpatch1  | 0.0000 | No |
| 33391 | Gpatch11 | 0.0000 | No |
| 33392 | Gpatch2  | 0.0000 | No |
| 33393 | Gpatch2l | 0.0000 | No |

|       |            |        |    |
|-------|------------|--------|----|
| 33394 | Gpatch3    | 0.0000 | No |
| 33395 | Gpatch4    | 0.0000 | No |
| 33396 | Gpatch8    | 0.0000 | No |
| 33397 | Gpbar1     | 0.0000 | No |
| 33398 | Gpbp1      | 0.0000 | No |
| 33399 | Gpbp111    | 0.0000 | No |
| 33400 | Gpc1       | 0.0000 | No |
| 33401 | Gpc2       | 0.0000 | No |
| 33402 | Gpc4       | 0.0000 | No |
| 33403 | Gpc6       | 0.0000 | No |
| 33404 | Gpcpd1     | 0.0000 | No |
| 33405 | Gpd1       | 0.0000 | No |
| 33406 | Gpd11      | 0.0000 | No |
| 33407 | Gpd2       | 0.0000 | No |
| 33408 | Gper1      | 0.0000 | No |
| 33409 | Gpha2      | 0.0000 | No |
| 33410 | Gphb5      | 0.0000 | No |
| 33411 | Gphn       | 0.0000 | No |
| 33412 | Gpi1       | 0.0000 | No |
| 33413 | Gpihbp1    | 0.0000 | No |
| 33414 | Gpkow      | 0.0000 | No |
| 33415 | Gpld1      | 0.0000 | No |
| 33416 | Gpm6a      | 0.0000 | No |
| 33417 | Gpn1       | 0.0000 | No |
| 33418 | Gpn2       | 0.0000 | No |
| 33419 | Gpn3       | 0.0000 | No |
| 33420 | Gpnmb      | 0.0000 | No |
| 33421 | Gpr1       | 0.0000 | No |
| 33422 | Gpr101     | 0.0000 | No |
| 33423 | Gpr107     | 0.0000 | No |
| 33424 | Gpr108     | 0.0000 | No |
| 33425 | Gpr119     | 0.0000 | No |
| 33426 | Gpr12      | 0.0000 | No |
| 33427 | Gpr132     | 0.0000 | No |
| 33428 | Gpr137     | 0.0000 | No |
| 33429 | Gpr137b    | 0.0000 | No |
| 33430 | Gpr137b-ps | 0.0000 | No |
| 33431 | Gpr137c    | 0.0000 | No |
| 33432 | Gpr139     | 0.0000 | No |
| 33433 | Gpr141     | 0.0000 | No |
| 33434 | Gpr143     | 0.0000 | No |
| 33435 | Gpr146     | 0.0000 | No |
| 33436 | Gpr149     | 0.0000 | No |
| 33437 | Gpr150     | 0.0000 | No |
| 33438 | Gpr151     | 0.0000 | No |
| 33439 | Gpr152     | 0.0000 | No |

|       |         |        |    |
|-------|---------|--------|----|
| 33440 | Gpr153  | 0.0000 | No |
| 33441 | Gpr155  | 0.0000 | No |
| 33442 | Gpr156  | 0.0000 | No |
| 33443 | Gpr158  | 0.0000 | No |
| 33444 | Gpr160  | 0.0000 | No |
| 33445 | Gpr161  | 0.0000 | No |
| 33446 | Gpr162  | 0.0000 | No |
| 33447 | Gpr165  | 0.0000 | No |
| 33448 | Gpr17   | 0.0000 | No |
| 33449 | Gpr171  | 0.0000 | No |
| 33450 | Gpr173  | 0.0000 | No |
| 33451 | Gpr174  | 0.0000 | No |
| 33452 | Gpr176  | 0.0000 | No |
| 33453 | Gpr179  | 0.0000 | No |
| 33454 | Gpr18   | 0.0000 | No |
| 33455 | Gpr180  | 0.0000 | No |
| 33456 | Gpr182  | 0.0000 | No |
| 33457 | Gpr183  | 0.0000 | No |
| 33458 | Gpr19   | 0.0000 | No |
| 33459 | Gpr20   | 0.0000 | No |
| 33460 | Gpr21   | 0.0000 | No |
| 33461 | Gpr22   | 0.0000 | No |
| 33462 | Gpr25   | 0.0000 | No |
| 33463 | Gpr26   | 0.0000 | No |
| 33464 | Gpr27   | 0.0000 | No |
| 33465 | Gpr3    | 0.0000 | No |
| 33466 | Gpr31b  | 0.0000 | No |
| 33467 | Gpr33   | 0.0000 | No |
| 33468 | Gpr34   | 0.0000 | No |
| 33469 | Gpr35   | 0.0000 | No |
| 33470 | Gpr37   | 0.0000 | No |
| 33471 | Gpr3711 | 0.0000 | No |
| 33472 | Gpr39   | 0.0000 | No |
| 33473 | Gpr4    | 0.0000 | No |
| 33474 | Gpr45   | 0.0000 | No |
| 33475 | Gpr50   | 0.0000 | No |
| 33476 | Gpr55   | 0.0000 | No |
| 33477 | Gpr6    | 0.0000 | No |
| 33478 | Gpr61   | 0.0000 | No |
| 33479 | Gpr62   | 0.0000 | No |
| 33480 | Gpr63   | 0.0000 | No |
| 33481 | Gpr65   | 0.0000 | No |
| 33482 | Gpr75   | 0.0000 | No |
| 33483 | Gpr83   | 0.0000 | No |
| 33484 | Gpr84   | 0.0000 | No |
| 33485 | Gpr85   | 0.0000 | No |



|       |          |        |    |
|-------|----------|--------|----|
| 33486 | Gpr87    | 0.0000 | No |
| 33487 | Gpr88    | 0.0000 | No |
| 33488 | Gpr89    | 0.0000 | No |
| 33489 | Gprasp1  | 0.0000 | No |
| 33490 | Gprasp2  | 0.0000 | No |
| 33491 | Gprc5b   | 0.0000 | No |
| 33492 | Gprc5c   | 0.0000 | No |
| 33493 | Gprc5d   | 0.0000 | No |
| 33494 | Gprc6a   | 0.0000 | No |
| 33495 | Gprin2   | 0.0000 | No |
| 33496 | Gprin3   | 0.0000 | No |
| 33497 | Gps1     | 0.0000 | No |
| 33498 | Gps2     | 0.0000 | No |
| 33499 | Gpsm1    | 0.0000 | No |
| 33500 | Gpsm3    | 0.0000 | No |
| 33501 | Gpt      | 0.0000 | No |
| 33502 | Gpt2     | 0.0000 | No |
| 33503 | Gpx1     | 0.0000 | No |
| 33504 | Gpx2-ps1 | 0.0000 | No |
| 33505 | Gpx3     | 0.0000 | No |
| 33506 | Gpx4     | 0.0000 | No |
| 33507 | Gpx5     | 0.0000 | No |
| 33508 | Gpx7     | 0.0000 | No |
| 33509 | Gpx8     | 0.0000 | No |
| 33510 | Gramd1a  | 0.0000 | No |
| 33511 | Gramd1b  | 0.0000 | No |
| 33512 | Gramd1c  | 0.0000 | No |
| 33513 | Gramd2   | 0.0000 | No |
| 33514 | Gramd3   | 0.0000 | No |
| 33515 | Gramd4   | 0.0000 | No |
| 33516 | Grap     | 0.0000 | No |
| 33517 | Grap2    | 0.0000 | No |
| 33518 | Grasp    | 0.0000 | No |
| 33519 | Grb10    | 0.0000 | No |
| 33520 | Grb14    | 0.0000 | No |
| 33521 | Grb2     | 0.0000 | No |
| 33522 | Grb7     | 0.0000 | No |
| 33523 | Grc10    | 0.0000 | No |
| 33524 | Greb11   | 0.0000 | No |
| 33525 | Grem1    | 0.0000 | No |
| 33526 | Grhl1    | 0.0000 | No |
| 33527 | Grhl2    | 0.0000 | No |
| 33528 | Grhl3    | 0.0000 | No |
| 33529 | Grhpr    | 0.0000 | No |
| 33530 | Gria1    | 0.0000 | No |
| 33531 | Gria2    | 0.0000 | No |

|       |          |        |    |
|-------|----------|--------|----|
| 33532 | Gria3    | 0.0000 | No |
| 33533 | Gria4    | 0.0000 | No |
| 33534 | Grid1    | 0.0000 | No |
| 33535 | Grid2    | 0.0000 | No |
| 33536 | Grid2ip  | 0.0000 | No |
| 33537 | Grifin   | 0.0000 | No |
| 33538 | Grik1    | 0.0000 | No |
| 33539 | Grik2    | 0.0000 | No |
| 33540 | Grik3    | 0.0000 | No |
| 33541 | Grik4    | 0.0000 | No |
| 33542 | Grik5    | 0.0000 | No |
| 33543 | Grin1    | 0.0000 | No |
| 33544 | Grin1os  | 0.0000 | No |
| 33545 | Grin2a   | 0.0000 | No |
| 33546 | Grin2b   | 0.0000 | No |
| 33547 | Grin2c   | 0.0000 | No |
| 33548 | Grin3a   | 0.0000 | No |
| 33549 | Grin3b   | 0.0000 | No |
| 33550 | Grina    | 0.0000 | No |
| 33551 | Grip1    | 0.0000 | No |
| 33552 | Grip1os1 | 0.0000 | No |
| 33553 | Grip1os2 | 0.0000 | No |
| 33554 | Grip1os3 | 0.0000 | No |
| 33555 | Grip2    | 0.0000 | No |
| 33556 | Gripap1  | 0.0000 | No |
| 33557 | Grk1     | 0.0000 | No |
| 33558 | Grk3     | 0.0000 | No |
| 33559 | Grk4     | 0.0000 | No |
| 33560 | Grk6     | 0.0000 | No |
| 33561 | Grm1     | 0.0000 | No |
| 33562 | Grm2     | 0.0000 | No |
| 33563 | Grm3     | 0.0000 | No |
| 33564 | Grm5     | 0.0000 | No |
| 33565 | Grm6     | 0.0000 | No |
| 33566 | Grm7     | 0.0000 | No |
| 33567 | Grm8     | 0.0000 | No |
| 33568 | Grn      | 0.0000 | No |
| 33569 | Grp      | 0.0000 | No |
| 33570 | Grpel1   | 0.0000 | No |
| 33571 | Grpel2   | 0.0000 | No |
| 33572 | Grsf1    | 0.0000 | No |
| 33573 | Grtp1    | 0.0000 | No |
| 33574 | Grwd1    | 0.0000 | No |
| 33575 | Grxcr1   | 0.0000 | No |
| 33576 | Grxcr2   | 0.0000 | No |
| 33577 | Gsap     | 0.0000 | No |

|       |           |        |    |
|-------|-----------|--------|----|
| 33578 | Gsc       | 0.0000 | No |
| 33579 | Gsc2      | 0.0000 | No |
| 33580 | Gsdma     | 0.0000 | No |
| 33581 | Gsdma2    | 0.0000 | No |
| 33582 | Gsdmc     | 0.0000 | No |
| 33583 | Gsdmc2    | 0.0000 | No |
| 33584 | Gsdmc3    | 0.0000 | No |
| 33585 | Gsdmc4    | 0.0000 | No |
| 33586 | Gsdmc11   | 0.0000 | No |
| 33587 | Gsdmc1-ps | 0.0000 | No |
| 33588 | Gsdmd     | 0.0000 | No |
| 33589 | Gse1      | 0.0000 | No |
| 33590 | Gsg1      | 0.0000 | No |
| 33591 | Gsg11     | 0.0000 | No |
| 33592 | Gsg112    | 0.0000 | No |
| 33593 | Gsg2      | 0.0000 | No |
| 33594 | Gsk3a     | 0.0000 | No |
| 33595 | Gsk3b     | 0.0000 | No |
| 33596 | Gskip     | 0.0000 | No |
| 33597 | Gsn       | 0.0000 | No |
| 33598 | Gspt1     | 0.0000 | No |
| 33599 | Gsr       | 0.0000 | No |
| 33600 | Gss       | 0.0000 | No |
| 33601 | Gssos1    | 0.0000 | No |
| 33602 | Gsta1     | 0.0000 | No |
| 33603 | Gsta2     | 0.0000 | No |
| 33604 | Gsta4     | 0.0000 | No |
| 33605 | Gsted     | 0.0000 | No |
| 33606 | Gstk1     | 0.0000 | No |
| 33607 | Gstm1     | 0.0000 | No |
| 33608 | Gstm2     | 0.0000 | No |
| 33609 | Gstm2-ps1 | 0.0000 | No |
| 33610 | Gstm3     | 0.0000 | No |
| 33611 | Gstm4     | 0.0000 | No |
| 33612 | Gstm5     | 0.0000 | No |
| 33613 | Gstm6     | 0.0000 | No |
| 33614 | Gstm7     | 0.0000 | No |
| 33615 | Gsto1     | 0.0000 | No |
| 33616 | Gsto2     | 0.0000 | No |
| 33617 | Gstp1     | 0.0000 | No |
| 33618 | Gstp2     | 0.0000 | No |
| 33619 | Gstp3     | 0.0000 | No |
| 33620 | Gstp-ps   | 0.0000 | No |
| 33621 | Gstt1     | 0.0000 | No |
| 33622 | Gstt2     | 0.0000 | No |
| 33623 | Gstt3     | 0.0000 | No |

|       |               |        |    |
|-------|---------------|--------|----|
| 33624 | Gstt4         | 0.0000 | No |
| 33625 | Gstz1         | 0.0000 | No |
| 33626 | Gsx1          | 0.0000 | No |
| 33627 | Gsx2          | 0.0000 | No |
| 33628 | Gtdc1         | 0.0000 | No |
| 33629 | Gtf2a1        | 0.0000 | No |
| 33630 | Gtf2b         | 0.0000 | No |
| 33631 | Gtf2e1        | 0.0000 | No |
| 33632 | Gtf2e2        | 0.0000 | No |
| 33633 | Gtf2f1        | 0.0000 | No |
| 33634 | Gtf2f2        | 0.0000 | No |
| 33635 | Gtf2h1        | 0.0000 | No |
| 33636 | Gtf2h2        | 0.0000 | No |
| 33637 | Gtf2h3        | 0.0000 | No |
| 33638 | Gtf2h4        | 0.0000 | No |
| 33639 | Gtf2h5        | 0.0000 | No |
| 33640 | Gtf2i         | 0.0000 | No |
| 33641 | Gtf2ird2      | 0.0000 | No |
| 33642 | Gtf3a         | 0.0000 | No |
| 33643 | Gtf3c1        | 0.0000 | No |
| 33644 | Gtf3c2        | 0.0000 | No |
| 33645 | Gtf3c4        | 0.0000 | No |
| 33646 | Gtf3c5        | 0.0000 | No |
| 33647 | Gtf3c6        | 0.0000 | No |
| 33648 | Gtpbp1        | 0.0000 | No |
| 33649 | Gtpbp10       | 0.0000 | No |
| 33650 | Gtpbp2        | 0.0000 | No |
| 33651 | Gtpbp3        | 0.0000 | No |
| 33652 | Gtpbp4        | 0.0000 | No |
| 33653 | Gtpbp4-ps1    | 0.0000 | No |
| 33654 | Gtpbp4-ps2    | 0.0000 | No |
| 33655 | Gtpbp4-ps3    | 0.0000 | No |
| 33656 | Gtpbp4-ps4    | 0.0000 | No |
| 33657 | Gtpbp4-ps6    | 0.0000 | No |
| 33658 | Gtpbp4-ps7    | 0.0000 | No |
| 33659 | Gtpbp6        | 0.0000 | No |
| 33660 | Gtpbp8        | 0.0000 | No |
| 33661 | Gt(ROSA)26Sor | 0.0000 | No |
| 33662 | Gtse1         | 0.0000 | No |
| 33663 | Guca1a        | 0.0000 | No |
| 33664 | Guca2a        | 0.0000 | No |
| 33665 | Gucd1         | 0.0000 | No |
| 33666 | Gucy1a2       | 0.0000 | No |
| 33667 | Gucy1a3       | 0.0000 | No |
| 33668 | Gucy1b2       | 0.0000 | No |
| 33669 | Gucy1b3       | 0.0000 | No |

|       |         |        |    |
|-------|---------|--------|----|
| 33670 | Gucy2c  | 0.0000 | No |
| 33671 | Gucy2d  | 0.0000 | No |
| 33672 | Gucy2e  | 0.0000 | No |
| 33673 | Gucy2f  | 0.0000 | No |
| 33674 | Gucy2g  | 0.0000 | No |
| 33675 | Guf1    | 0.0000 | No |
| 33676 | Guk1    | 0.0000 | No |
| 33677 | Gulo    | 0.0000 | No |
| 33678 | Gusb    | 0.0000 | No |
| 33679 | Gvin1   | 0.0000 | No |
| 33680 | Gxylt1  | 0.0000 | No |
| 33681 | Gxylt2  | 0.0000 | No |
| 33682 | Gyg     | 0.0000 | No |
| 33683 | Gykl1   | 0.0000 | No |
| 33684 | Gypa    | 0.0000 | No |
| 33685 | Gypc    | 0.0000 | No |
| 33686 | Gys1    | 0.0000 | No |
| 33687 | Gys2    | 0.0000 | No |
| 33688 | Gzf1    | 0.0000 | No |
| 33689 | Gzma    | 0.0000 | No |
| 33690 | Gzmb    | 0.0000 | No |
| 33691 | Gzmd    | 0.0000 | No |
| 33692 | Gzme    | 0.0000 | No |
| 33693 | Gzmf    | 0.0000 | No |
| 33694 | Gzmg    | 0.0000 | No |
| 33695 | Gzmm    | 0.0000 | No |
| 33696 | H13     | 0.0000 | No |
| 33697 | H1f0    | 0.0000 | No |
| 33698 | H1fnt   | 0.0000 | No |
| 33699 | H1foo   | 0.0000 | No |
| 33700 | H2-Aa   | 0.0000 | No |
| 33701 | H2afb1  | 0.0000 | No |
| 33702 | H2afb2  | 0.0000 | No |
| 33703 | H2afb3  | 0.0000 | No |
| 33704 | H2afj   | 0.0000 | No |
| 33705 | H2af-ps | 0.0000 | No |
| 33706 | H2afv   | 0.0000 | No |
| 33707 | H2afx   | 0.0000 | No |
| 33708 | H2afy   | 0.0000 | No |
| 33709 | H2afy2  | 0.0000 | No |
| 33710 | H2afy3  | 0.0000 | No |
| 33711 | H2afz   | 0.0000 | No |
| 33712 | H2al1a  | 0.0000 | No |
| 33713 | H2al1b  | 0.0000 | No |
| 33714 | H2al1c  | 0.0000 | No |
| 33715 | H2al1d  | 0.0000 | No |

|       |          |        |    |
|-------|----------|--------|----|
| 33716 | H2alle   | 0.0000 | No |
| 33717 | H2al1f   | 0.0000 | No |
| 33718 | H2al1g   | 0.0000 | No |
| 33719 | H2al1h   | 0.0000 | No |
| 33720 | H2al1i   | 0.0000 | No |
| 33721 | H2al1j   | 0.0000 | No |
| 33722 | H2al1k   | 0.0000 | No |
| 33723 | H2al1m   | 0.0000 | No |
| 33724 | H2al1n   | 0.0000 | No |
| 33725 | H2al1o   | 0.0000 | No |
| 33726 | H2al2a   | 0.0000 | No |
| 33727 | H2al2b   | 0.0000 | No |
| 33728 | H2al2c   | 0.0000 | No |
| 33729 | H2al3    | 0.0000 | No |
| 33730 | H2bfm    | 0.0000 | No |
| 33731 | H2-B1    | 0.0000 | No |
| 33732 | H2-D1    | 0.0000 | No |
| 33733 | H2-Ea-ps | 0.0000 | No |
| 33734 | H2-Eb1   | 0.0000 | No |
| 33735 | H2-K1    | 0.0000 | No |
| 33736 | H2-K2    | 0.0000 | No |
| 33737 | H2-Ke6   | 0.0000 | No |
| 33738 | H2-M1    | 0.0000 | No |
| 33739 | H2-M10.1 | 0.0000 | No |
| 33740 | H2-M10.2 | 0.0000 | No |
| 33741 | H2-M10.3 | 0.0000 | No |
| 33742 | H2-M10.5 | 0.0000 | No |
| 33743 | H2-M10.6 | 0.0000 | No |
| 33744 | H2-M11   | 0.0000 | No |
| 33745 | H2-M2    | 0.0000 | No |
| 33746 | H2-M3    | 0.0000 | No |
| 33747 | H2-M6-ps | 0.0000 | No |
| 33748 | H2-Oa    | 0.0000 | No |
| 33749 | H2-Q1    | 0.0000 | No |
| 33750 | H2-Q10   | 0.0000 | No |
| 33751 | H2-Q2    | 0.0000 | No |
| 33752 | H2-Q4    | 0.0000 | No |
| 33753 | H2-Q5    | 0.0000 | No |
| 33754 | H2-Q6    | 0.0000 | No |
| 33755 | H2-Q7    | 0.0000 | No |
| 33756 | H2-T10   | 0.0000 | No |
| 33757 | H2-T22   | 0.0000 | No |
| 33758 | H2-T23   | 0.0000 | No |
| 33759 | H2-T24   | 0.0000 | No |
| 33760 | H2-T3    | 0.0000 | No |
| 33761 | H2-T-ps  | 0.0000 | No |

|       |           |        |    |
|-------|-----------|--------|----|
| 33762 | H3f3a     | 0.0000 | No |
| 33763 | H3f3aos   | 0.0000 | No |
| 33764 | H3f3a-ps1 | 0.0000 | No |
| 33765 | H3f3a-ps2 | 0.0000 | No |
| 33766 | H3f3b     | 0.0000 | No |
| 33767 | H3f3c     | 0.0000 | No |
| 33768 | H60b      | 0.0000 | No |
| 33769 | H6pd      | 0.0000 | No |
| 33770 | Haa0      | 0.0000 | No |
| 33771 | Habp2     | 0.0000 | No |
| 33772 | Habp4     | 0.0000 | No |
| 33773 | Hacd1     | 0.0000 | No |
| 33774 | Hacd2     | 0.0000 | No |
| 33775 | Hacd4     | 0.0000 | No |
| 33776 | Hace1     | 0.0000 | No |
| 33777 | Hacl1     | 0.0000 | No |
| 33778 | Hadh      | 0.0000 | No |
| 33779 | Hadha     | 0.0000 | No |
| 33780 | Hadhb     | 0.0000 | No |
| 33781 | Hagh      | 0.0000 | No |
| 33782 | Haghl     | 0.0000 | No |
| 33783 | Haglr     | 0.0000 | No |
| 33784 | Hal       | 0.0000 | No |
| 33785 | Halr1     | 0.0000 | No |
| 33786 | Hamp      | 0.0000 | No |
| 33787 | Hamp2     | 0.0000 | No |
| 33788 | Hand1     | 0.0000 | No |
| 33789 | Hand2     | 0.0000 | No |
| 33790 | Hao1      | 0.0000 | No |
| 33791 | Hao2      | 0.0000 | No |
| 33792 | Hap1      | 0.0000 | No |
| 33793 | Hapln1    | 0.0000 | No |
| 33794 | Hapln3    | 0.0000 | No |
| 33795 | Hapln4    | 0.0000 | No |
| 33796 | Harbi1    | 0.0000 | No |
| 33797 | Hars      | 0.0000 | No |
| 33798 | Hars2     | 0.0000 | No |
| 33799 | Has1      | 0.0000 | No |
| 33800 | Has2      | 0.0000 | No |
| 33801 | Has3      | 0.0000 | No |
| 33802 | Hat1      | 0.0000 | No |
| 33803 | Haus1     | 0.0000 | No |
| 33804 | Haus2     | 0.0000 | No |
| 33805 | Haus3     | 0.0000 | No |
| 33806 | Haus4     | 0.0000 | No |
| 33807 | Haus5     | 0.0000 | No |

|       |             |        |    |
|-------|-------------|--------|----|
| 33808 | Haus6       | 0.0000 | No |
| 33809 | Haus7       | 0.0000 | No |
| 33810 | Haus8       | 0.0000 | No |
| 33811 | Havcr1      | 0.0000 | No |
| 33812 | Havcr2      | 0.0000 | No |
| 33813 | Hax1        | 0.0000 | No |
| 33814 | Hba-ps4     | 0.0000 | No |
| 33815 | Hba-x       | 0.0000 | No |
| 33816 | Hbb-bh0     | 0.0000 | No |
| 33817 | Hbb-bh1     | 0.0000 | No |
| 33818 | Hbb-bh3     | 0.0000 | No |
| 33819 | Hbb-bs      | 0.0000 | No |
| 33820 | Hbb-bt      | 0.0000 | No |
| 33821 | Hbb-y       | 0.0000 | No |
| 33822 | Hbegf       | 0.0000 | No |
| 33823 | Hbp1        | 0.0000 | No |
| 33824 | Hbq1a       | 0.0000 | No |
| 33825 | Hbq1b       | 0.0000 | No |
| 33826 | Hbs11       | 0.0000 | No |
| 33827 | Hcar1       | 0.0000 | No |
| 33828 | Hcar2       | 0.0000 | No |
| 33829 | Hccs        | 0.0000 | No |
| 33830 | Hcfc1       | 0.0000 | No |
| 33831 | Hcfc1r1     | 0.0000 | No |
| 33832 | Hcfc1r1-ps1 | 0.0000 | No |
| 33833 | Hcfc1r1-ps2 | 0.0000 | No |
| 33834 | Hcfc2       | 0.0000 | No |
| 33835 | Hck         | 0.0000 | No |
| 33836 | Hcls1       | 0.0000 | No |
| 33837 | Hcn1        | 0.0000 | No |
| 33838 | Hcn2        | 0.0000 | No |
| 33839 | Hcn3        | 0.0000 | No |
| 33840 | Hcn4        | 0.0000 | No |
| 33841 | Hcrt        | 0.0000 | No |
| 33842 | Hcrtr2      | 0.0000 | No |
| 33843 | Hcst        | 0.0000 | No |
| 33844 | Hdac1       | 0.0000 | No |
| 33845 | Hdac10      | 0.0000 | No |
| 33846 | Hdac11      | 0.0000 | No |
| 33847 | Hdac2       | 0.0000 | No |
| 33848 | Hdac3       | 0.0000 | No |
| 33849 | Hdac5       | 0.0000 | No |
| 33850 | Hdac6       | 0.0000 | No |
| 33851 | Hdac8       | 0.0000 | No |
| 33852 | Hdc         | 0.0000 | No |
| 33853 | Hddc2       | 0.0000 | No |



|       |          |        |    |
|-------|----------|--------|----|
| 33854 | Hddc3    | 0.0000 | No |
| 33855 | Hdgf     | 0.0000 | No |
| 33856 | Hdgfrp2  | 0.0000 | No |
| 33857 | Hdgfrp3  | 0.0000 | No |
| 33858 | Hdhd1a   | 0.0000 | No |
| 33859 | Hdhd2    | 0.0000 | No |
| 33860 | Hdhd3    | 0.0000 | No |
| 33861 | Hdlbp    | 0.0000 | No |
| 33862 | Hdx      | 0.0000 | No |
| 33863 | Heatr1   | 0.0000 | No |
| 33864 | Heatr3   | 0.0000 | No |
| 33865 | Heatr4   | 0.0000 | No |
| 33866 | Heatr5a  | 0.0000 | No |
| 33867 | Heatr5b  | 0.0000 | No |
| 33868 | Heatr6   | 0.0000 | No |
| 33869 | Heatr9   | 0.0000 | No |
| 33870 | Hebp1    | 0.0000 | No |
| 33871 | Heca     | 0.0000 | No |
| 33872 | Hectd1   | 0.0000 | No |
| 33873 | Hectd3   | 0.0000 | No |
| 33874 | Hecw1    | 0.0000 | No |
| 33875 | Hecw2    | 0.0000 | No |
| 33876 | Heg1     | 0.0000 | No |
| 33877 | Helb     | 0.0000 | No |
| 33878 | Hells    | 0.0000 | No |
| 33879 | Helq     | 0.0000 | No |
| 33880 | Helz     | 0.0000 | No |
| 33881 | Helz2    | 0.0000 | No |
| 33882 | Hemgn    | 0.0000 | No |
| 33883 | Hemk1    | 0.0000 | No |
| 33884 | Henmt1   | 0.0000 | No |
| 33885 | Hepacam  | 0.0000 | No |
| 33886 | Hepacam2 | 0.0000 | No |
| 33887 | Heph     | 0.0000 | No |
| 33888 | Heph11   | 0.0000 | No |
| 33889 | Herc1    | 0.0000 | No |
| 33890 | Herc2    | 0.0000 | No |
| 33891 | Herc3    | 0.0000 | No |
| 33892 | Herc4    | 0.0000 | No |
| 33893 | Herc6    | 0.0000 | No |
| 33894 | Herpud2  | 0.0000 | No |
| 33895 | Hes1     | 0.0000 | No |
| 33896 | Hes2     | 0.0000 | No |
| 33897 | Hes3     | 0.0000 | No |
| 33898 | Hes6     | 0.0000 | No |
| 33899 | Hesx1    | 0.0000 | No |

|       |         |        |    |
|-------|---------|--------|----|
| 33900 | Hexa    | 0.0000 | No |
| 33901 | Hexb    | 0.0000 | No |
| 33902 | Hexdc   | 0.0000 | No |
| 33903 | Hexim1  | 0.0000 | No |
| 33904 | Hexim2  | 0.0000 | No |
| 33905 | Hey2    | 0.0000 | No |
| 33906 | Heyl    | 0.0000 | No |
| 33907 | Hfe     | 0.0000 | No |
| 33908 | Hfe2    | 0.0000 | No |
| 33909 | Hfm1    | 0.0000 | No |
| 33910 | Hgd     | 0.0000 | No |
| 33911 | Hgf     | 0.0000 | No |
| 33912 | Hgfac   | 0.0000 | No |
| 33913 | Hgh1    | 0.0000 | No |
| 33914 | Hgs     | 0.0000 | No |
| 33915 | Hgsnat  | 0.0000 | No |
| 33916 | Hhat    | 0.0000 | No |
| 33917 | Hhatl   | 0.0000 | No |
| 33918 | Hhip    | 0.0000 | No |
| 33919 | Hhipl1  | 0.0000 | No |
| 33920 | Hhipl2  | 0.0000 | No |
| 33921 | Hhla1   | 0.0000 | No |
| 33922 | Hibadh  | 0.0000 | No |
| 33923 | Hibch   | 0.0000 | No |
| 33924 | Hic1    | 0.0000 | No |
| 33925 | Hic2    | 0.0000 | No |
| 33926 | Hid1    | 0.0000 | No |
| 33927 | Hif1a   | 0.0000 | No |
| 33928 | Hif1an  | 0.0000 | No |
| 33929 | Hif3a   | 0.0000 | No |
| 33930 | Higd1a  | 0.0000 | No |
| 33931 | Higd1b  | 0.0000 | No |
| 33932 | Higd1c  | 0.0000 | No |
| 33933 | Higd2a  | 0.0000 | No |
| 33934 | Hikeshi | 0.0000 | No |
| 33935 | Hilpda  | 0.0000 | No |
| 33936 | Hils1   | 0.0000 | No |
| 33937 | Hinfp   | 0.0000 | No |
| 33938 | Hint1   | 0.0000 | No |
| 33939 | Hint2   | 0.0000 | No |
| 33940 | Hint3   | 0.0000 | No |
| 33941 | Hip1    | 0.0000 | No |
| 33942 | Hip1r   | 0.0000 | No |
| 33943 | Hipk1   | 0.0000 | No |
| 33944 | Hipk2   | 0.0000 | No |
| 33945 | Hipk3   | 0.0000 | No |

|       |           |        |    |
|-------|-----------|--------|----|
| 33946 | Hipk4     | 0.0000 | No |
| 33947 | Hira      | 0.0000 | No |
| 33948 | Hirip3    | 0.0000 | No |
| 33949 | Hist1h1a  | 0.0000 | No |
| 33950 | Hist1h1b  | 0.0000 | No |
| 33951 | Hist1h1c  | 0.0000 | No |
| 33952 | Hist1h1d  | 0.0000 | No |
| 33953 | Hist1h1e  | 0.0000 | No |
| 33954 | Hist1h1t  | 0.0000 | No |
| 33955 | Hist1h2aa | 0.0000 | No |
| 33956 | Hist1h2ab | 0.0000 | No |
| 33957 | Hist1h2ac | 0.0000 | No |
| 33958 | Hist1h2ae | 0.0000 | No |
| 33959 | Hist1h2ag | 0.0000 | No |
| 33960 | Hist1h2ai | 0.0000 | No |
| 33961 | Hist1h2ak | 0.0000 | No |
| 33962 | Hist1h2an | 0.0000 | No |
| 33963 | Hist1h2ao | 0.0000 | No |
| 33964 | Hist1h2ap | 0.0000 | No |
| 33965 | Hist1h2ba | 0.0000 | No |
| 33966 | Hist1h2bb | 0.0000 | No |
| 33967 | Hist1h2bc | 0.0000 | No |
| 33968 | Hist1h2be | 0.0000 | No |
| 33969 | Hist1h2bg | 0.0000 | No |
| 33970 | Hist1h2bh | 0.0000 | No |
| 33971 | Hist1h2bj | 0.0000 | No |
| 33972 | Hist1h2bk | 0.0000 | No |
| 33973 | Hist1h2bm | 0.0000 | No |
| 33974 | Hist1h2bn | 0.0000 | No |
| 33975 | Hist1h2bp | 0.0000 | No |
| 33976 | Hist1h2bq | 0.0000 | No |
| 33977 | Hist1h2br | 0.0000 | No |
| 33978 | Hist1h3a  | 0.0000 | No |
| 33979 | Hist1h3c  | 0.0000 | No |
| 33980 | Hist1h3d  | 0.0000 | No |
| 33981 | Hist1h3e  | 0.0000 | No |
| 33982 | Hist1h3f  | 0.0000 | No |
| 33983 | Hist1h3g  | 0.0000 | No |
| 33984 | Hist1h3h  | 0.0000 | No |
| 33985 | Hist1h3i  | 0.0000 | No |
| 33986 | Hist1h4a  | 0.0000 | No |
| 33987 | Hist1h4b  | 0.0000 | No |
| 33988 | Hist1h4c  | 0.0000 | No |
| 33989 | Hist1h4d  | 0.0000 | No |
| 33990 | Hist1h4h  | 0.0000 | No |
| 33991 | Hist1h4i  | 0.0000 | No |

|       |              |        |    |
|-------|--------------|--------|----|
| 33992 | Hist1h4j     | 0.0000 | No |
| 33993 | Hist1h4k     | 0.0000 | No |
| 33994 | Hist1h4m     | 0.0000 | No |
| 33995 | Hist1h4n     | 0.0000 | No |
| 33996 | Hist2h2aa1   | 0.0000 | No |
| 33997 | Hist2h2aa2   | 0.0000 | No |
| 33998 | Hist2h2ab    | 0.0000 | No |
| 33999 | Hist2h2ac    | 0.0000 | No |
| 34000 | Hist2h2bb    | 0.0000 | No |
| 34001 | Hist2h2be    | 0.0000 | No |
| 34002 | Hist2h3b     | 0.0000 | No |
| 34003 | Hist2h3c1    | 0.0000 | No |
| 34004 | Hist2h3c2    | 0.0000 | No |
| 34005 | Hist2h4      | 0.0000 | No |
| 34006 | Hist3h2a     | 0.0000 | No |
| 34007 | Hist3h2ba    | 0.0000 | No |
| 34008 | Hist3h2bb-ps | 0.0000 | No |
| 34009 | Hist4h4      | 0.0000 | No |
| 34010 | Hivep1       | 0.0000 | No |
| 34011 | Hivep2       | 0.0000 | No |
| 34012 | Hivep3       | 0.0000 | No |
| 34013 | Hjurp        | 0.0000 | No |
| 34014 | Hk1os        | 0.0000 | No |
| 34015 | Hk2          | 0.0000 | No |
| 34016 | Hk3          | 0.0000 | No |
| 34017 | Hkdc1        | 0.0000 | No |
| 34018 | Hlcs         | 0.0000 | No |
| 34019 | Hlf          | 0.0000 | No |
| 34020 | Hltf         | 0.0000 | No |
| 34021 | Hlx          | 0.0000 | No |
| 34022 | Hm629797     | 0.0000 | No |
| 34023 | Hmbox1       | 0.0000 | No |
| 34024 | Hmbs         | 0.0000 | No |
| 34025 | Hmces        | 0.0000 | No |
| 34026 | Hmcn1        | 0.0000 | No |
| 34027 | Hmcn2        | 0.0000 | No |
| 34028 | Hmg20a       | 0.0000 | No |
| 34029 | Hmg20b       | 0.0000 | No |
| 34030 | Hmga1        | 0.0000 | No |
| 34031 | Hmga1-rs1    | 0.0000 | No |
| 34032 | Hmga2        | 0.0000 | No |
| 34033 | Hmgb1        | 0.0000 | No |
| 34034 | Hmgb1l       | 0.0000 | No |
| 34035 | Hmgb1-ps1    | 0.0000 | No |
| 34036 | Hmgb1-ps2    | 0.0000 | No |
| 34037 | Hmgb1-ps3    | 0.0000 | No |

|       |              |        |    |
|-------|--------------|--------|----|
| 34038 | Hmgb1-ps4    | 0.0000 | No |
| 34039 | Hmgb1-ps5    | 0.0000 | No |
| 34040 | Hmgb1-ps6    | 0.0000 | No |
| 34041 | Hmgb1-ps7    | 0.0000 | No |
| 34042 | Hmgb1-ps8    | 0.0000 | No |
| 34043 | Hmgb1-ps9    | 0.0000 | No |
| 34044 | Hmgb1-rs16   | 0.0000 | No |
| 34045 | Hmgb1-rs17   | 0.0000 | No |
| 34046 | Hmgb1-rs18   | 0.0000 | No |
| 34047 | Hmgb2        | 0.0000 | No |
| 34048 | Hmgb3        | 0.0000 | No |
| 34049 | Hmgb4        | 0.0000 | No |
| 34050 | Hmgb4os      | 0.0000 | No |
| 34051 | Hmgcl        | 0.0000 | No |
| 34052 | Hmgcll1      | 0.0000 | No |
| 34053 | Hmgr         | 0.0000 | No |
| 34054 | Hmgcs1       | 0.0000 | No |
| 34055 | Hmgcs2       | 0.0000 | No |
| 34056 | Hmgn1        | 0.0000 | No |
| 34057 | Hmgn2        | 0.0000 | No |
| 34058 | Hmgn2l6      | 0.0000 | No |
| 34059 | Hmgn2-ps1    | 0.0000 | No |
| 34060 | Hmgn3        | 0.0000 | No |
| 34061 | Hmgn5        | 0.0000 | No |
| 34062 | Hmgxb3       | 0.0000 | No |
| 34063 | Hmgxb4       | 0.0000 | No |
| 34064 | Hmha1        | 0.0000 | No |
| 34065 | Hmmr         | 0.0000 | No |
| 34066 | Hmox1        | 0.0000 | No |
| 34067 | Hmox2        | 0.0000 | No |
| 34068 | Hmx1         | 0.0000 | No |
| 34069 | Hmx2         | 0.0000 | No |
| 34070 | Hmx3         | 0.0000 | No |
| 34071 | Hn1          | 0.0000 | No |
| 34072 | Hn1l         | 0.0000 | No |
| 34073 | Hnf1a        | 0.0000 | No |
| 34074 | Hnf1aos1     | 0.0000 | No |
| 34075 | Hnf1aos2     | 0.0000 | No |
| 34076 | Hnf1b        | 0.0000 | No |
| 34077 | Hnf4a        | 0.0000 | No |
| 34078 | Hnf4aos      | 0.0000 | No |
| 34079 | Hnf4g        | 0.0000 | No |
| 34080 | Hnmt         | 0.0000 | No |
| 34081 | Hnrnpa0      | 0.0000 | No |
| 34082 | Hnrnpa1      | 0.0000 | No |
| 34083 | Hnrnpa1l2-ps | 0.0000 | No |

|       |           |        |    |
|-------|-----------|--------|----|
| 34084 | Hnrnpa2b1 | 0.0000 | No |
| 34085 | Hnrnpa3   | 0.0000 | No |
| 34086 | Hnrnpab   | 0.0000 | No |
| 34087 | Hnrnpc    | 0.0000 | No |
| 34088 | Hnrnpd    | 0.0000 | No |
| 34089 | Hnrnpdl   | 0.0000 | No |
| 34090 | Hnrnpf    | 0.0000 | No |
| 34091 | Hnrnp1    | 0.0000 | No |
| 34092 | Hnrnp2    | 0.0000 | No |
| 34093 | Hnrnp3    | 0.0000 | No |
| 34094 | Hnrnpk    | 0.0000 | No |
| 34095 | Hnrnpl    | 0.0000 | No |
| 34096 | Hnrnpm    | 0.0000 | No |
| 34097 | Hnrnpr    | 0.0000 | No |
| 34098 | Hnrnpu    | 0.0000 | No |
| 34099 | Hnrnpul1  | 0.0000 | No |
| 34100 | Hnrnpul2  | 0.0000 | No |
| 34101 | Hoga1     | 0.0000 | No |
| 34102 | Homer1    | 0.0000 | No |
| 34103 | Homer2    | 0.0000 | No |
| 34104 | Homer3    | 0.0000 | No |
| 34105 | Homez     | 0.0000 | No |
| 34106 | Hook1     | 0.0000 | No |
| 34107 | Hook2     | 0.0000 | No |
| 34108 | Hopx      | 0.0000 | No |
| 34109 | Hopxos    | 0.0000 | No |
| 34110 | Hormad1   | 0.0000 | No |
| 34111 | Hormad2   | 0.0000 | No |
| 34112 | Hotairm1  | 0.0000 | No |
| 34113 | Hottip    | 0.0000 | No |
| 34114 | Hoxa1     | 0.0000 | No |
| 34115 | Hoxa10    | 0.0000 | No |
| 34116 | Hoxa11    | 0.0000 | No |
| 34117 | Hoxa11os  | 0.0000 | No |
| 34118 | Hoxa13    | 0.0000 | No |
| 34119 | Hoxa2     | 0.0000 | No |
| 34120 | Hoxa3     | 0.0000 | No |
| 34121 | Hoxa4     | 0.0000 | No |
| 34122 | Hoxa5     | 0.0000 | No |
| 34123 | Hoxa6     | 0.0000 | No |
| 34124 | Hoxa7     | 0.0000 | No |
| 34125 | Hoxa9     | 0.0000 | No |
| 34126 | Hoxaas2   | 0.0000 | No |
| 34127 | Hoxaas3   | 0.0000 | No |
| 34128 | Hoxb1     | 0.0000 | No |
| 34129 | Hoxb13    | 0.0000 | No |

|       |         |        |    |
|-------|---------|--------|----|
| 34130 | Hoxb2   | 0.0000 | No |
| 34131 | Hoxb3os | 0.0000 | No |
| 34132 | Hoxb4   | 0.0000 | No |
| 34133 | Hoxb5   | 0.0000 | No |
| 34134 | Hoxb5os | 0.0000 | No |
| 34135 | Hoxb6   | 0.0000 | No |
| 34136 | Hoxb7   | 0.0000 | No |
| 34137 | Hoxb8   | 0.0000 | No |
| 34138 | Hoxc10  | 0.0000 | No |
| 34139 | Hoxc11  | 0.0000 | No |
| 34140 | Hoxc12  | 0.0000 | No |
| 34141 | Hoxc13  | 0.0000 | No |
| 34142 | Hoxc4   | 0.0000 | No |
| 34143 | Hoxc5   | 0.0000 | No |
| 34144 | Hoxc6   | 0.0000 | No |
| 34145 | Hoxc9   | 0.0000 | No |
| 34146 | Hoxd1   | 0.0000 | No |
| 34147 | Hoxd10  | 0.0000 | No |
| 34148 | Hoxd13  | 0.0000 | No |
| 34149 | Hoxd3   | 0.0000 | No |
| 34150 | Hoxd8   | 0.0000 | No |
| 34151 | Hp      | 0.0000 | No |
| 34152 | Hp1bp3  | 0.0000 | No |
| 34153 | Hpca    | 0.0000 | No |
| 34154 | Hpcal4  | 0.0000 | No |
| 34155 | Hpd     | 0.0000 | No |
| 34156 | Hpdl    | 0.0000 | No |
| 34157 | Hpf1    | 0.0000 | No |
| 34158 | Hpgds   | 0.0000 | No |
| 34159 | Hpn     | 0.0000 | No |
| 34160 | Hprt    | 0.0000 | No |
| 34161 | Hps1    | 0.0000 | No |
| 34162 | Hps3    | 0.0000 | No |
| 34163 | Hps4    | 0.0000 | No |
| 34164 | Hps5    | 0.0000 | No |
| 34165 | Hps6    | 0.0000 | No |
| 34166 | Hpse2   | 0.0000 | No |
| 34167 | Hpx     | 0.0000 | No |
| 34168 | Hr      | 0.0000 | No |
| 34169 | Hras    | 0.0000 | No |
| 34170 | Hrasls  | 0.0000 | No |
| 34171 | Hrasls5 | 0.0000 | No |
| 34172 | Hrc     | 0.0000 | No |
| 34173 | Hrct1   | 0.0000 | No |
| 34174 | Hrg     | 0.0000 | No |
| 34175 | Hrh1    | 0.0000 | No |

|       |           |        |    |
|-------|-----------|--------|----|
| 34176 | Hrh2      | 0.0000 | No |
| 34177 | Hrh3      | 0.0000 | No |
| 34178 | Hrh4      | 0.0000 | No |
| 34179 | Hrk       | 0.0000 | No |
| 34180 | Hs1bp3    | 0.0000 | No |
| 34181 | Hs2st1    | 0.0000 | No |
| 34182 | Hs3st2    | 0.0000 | No |
| 34183 | Hs3st3b1  | 0.0000 | No |
| 34184 | Hs3st4    | 0.0000 | No |
| 34185 | Hs3st5    | 0.0000 | No |
| 34186 | Hs3st6    | 0.0000 | No |
| 34187 | Hs6st1    | 0.0000 | No |
| 34188 | Hs6st2    | 0.0000 | No |
| 34189 | Hs6st3    | 0.0000 | No |
| 34190 | Hsbp1     | 0.0000 | No |
| 34191 | Hsbp111   | 0.0000 | No |
| 34192 | Hscb      | 0.0000 | No |
| 34193 | Hsd11b1   | 0.0000 | No |
| 34194 | Hsd11b2   | 0.0000 | No |
| 34195 | Hsd17b1   | 0.0000 | No |
| 34196 | Hsd17b10  | 0.0000 | No |
| 34197 | Hsd17b11  | 0.0000 | No |
| 34198 | Hsd17b12  | 0.0000 | No |
| 34199 | Hsd17b13  | 0.0000 | No |
| 34200 | Hsd17b14  | 0.0000 | No |
| 34201 | Hsd17b2   | 0.0000 | No |
| 34202 | Hsd17b3   | 0.0000 | No |
| 34203 | Hsd17b4   | 0.0000 | No |
| 34204 | Hsd17b6   | 0.0000 | No |
| 34205 | Hsd17b7   | 0.0000 | No |
| 34206 | Hsd3b2    | 0.0000 | No |
| 34207 | Hsd3b3    | 0.0000 | No |
| 34208 | Hsd3b4    | 0.0000 | No |
| 34209 | Hsd3b5    | 0.0000 | No |
| 34210 | Hsd3b6    | 0.0000 | No |
| 34211 | Hsd11     | 0.0000 | No |
| 34212 | Hsd12     | 0.0000 | No |
| 34213 | Hsf1      | 0.0000 | No |
| 34214 | Hsf2      | 0.0000 | No |
| 34215 | Hsf2bp    | 0.0000 | No |
| 34216 | Hsf3      | 0.0000 | No |
| 34217 | Hsf4      | 0.0000 | No |
| 34218 | Hsf5      | 0.0000 | No |
| 34219 | Hsfy2     | 0.0000 | No |
| 34220 | Hsp25-ps1 | 0.0000 | No |
| 34221 | Hsp90aa1  | 0.0000 | No |



|       |           |        |    |
|-------|-----------|--------|----|
| 34222 | Hsp90ab1  | 0.0000 | No |
| 34223 | Hsp90b1   | 0.0000 | No |
| 34224 | Hspa12a   | 0.0000 | No |
| 34225 | Hspa12b   | 0.0000 | No |
| 34226 | Hspa13    | 0.0000 | No |
| 34227 | Hspa14    | 0.0000 | No |
| 34228 | Hspa1a    | 0.0000 | No |
| 34229 | Hspa1b    | 0.0000 | No |
| 34230 | Hspa11    | 0.0000 | No |
| 34231 | Hspa2     | 0.0000 | No |
| 34232 | Hspa4     | 0.0000 | No |
| 34233 | Hspa4l    | 0.0000 | No |
| 34234 | Hspa5     | 0.0000 | No |
| 34235 | Hspa8     | 0.0000 | No |
| 34236 | Hspa9     | 0.0000 | No |
| 34237 | Hspa9-ps1 | 0.0000 | No |
| 34238 | Hspb1     | 0.0000 | No |
| 34239 | Hspb11    | 0.0000 | No |
| 34240 | Hspb2     | 0.0000 | No |
| 34241 | Hspb3     | 0.0000 | No |
| 34242 | Hspb6     | 0.0000 | No |
| 34243 | Hspb7     | 0.0000 | No |
| 34244 | Hspb8     | 0.0000 | No |
| 34245 | Hspb9     | 0.0000 | No |
| 34246 | Hspbap1   | 0.0000 | No |
| 34247 | Hspbpl    | 0.0000 | No |
| 34248 | Hspd1     | 0.0000 | No |
| 34249 | Hspd1-ps2 | 0.0000 | No |
| 34250 | Hspd1-ps3 | 0.0000 | No |
| 34251 | Hspd1-ps4 | 0.0000 | No |
| 34252 | Hspe1     | 0.0000 | No |
| 34253 | Hspe1-ps2 | 0.0000 | No |
| 34254 | Hspe1-ps3 | 0.0000 | No |
| 34255 | Hspe1-ps4 | 0.0000 | No |
| 34256 | Hspe1-ps5 | 0.0000 | No |
| 34257 | Hspe1-ps6 | 0.0000 | No |
| 34258 | Hspg2     | 0.0000 | No |
| 34259 | Hsph1     | 0.0000 | No |
| 34260 | Htatip2   | 0.0000 | No |
| 34261 | Htatsf1   | 0.0000 | No |
| 34262 | Htr1a     | 0.0000 | No |
| 34263 | Htr1d     | 0.0000 | No |
| 34264 | Htr1f     | 0.0000 | No |
| 34265 | Htr2a     | 0.0000 | No |
| 34266 | Htr2b     | 0.0000 | No |
| 34267 | Htr2c     | 0.0000 | No |

|       |               |        |    |
|-------|---------------|--------|----|
| 34268 | Htr3a         | 0.0000 | No |
| 34269 | Htr4          | 0.0000 | No |
| 34270 | Htr5a         | 0.0000 | No |
| 34271 | Htr5b         | 0.0000 | No |
| 34272 | Htr7          | 0.0000 | No |
| 34273 | Htra2         | 0.0000 | No |
| 34274 | Htra4         | 0.0000 | No |
| 34275 | Htt           | 0.0000 | No |
| 34276 | Hunk          | 0.0000 | No |
| 34277 | Hus1          | 0.0000 | No |
| 34278 | Hus1b         | 0.0000 | No |
| 34279 | Huwe1         | 0.0000 | No |
| 34280 | Hvcn1         | 0.0000 | No |
| 34281 | Hyal1         | 0.0000 | No |
| 34282 | Hyal2         | 0.0000 | No |
| 34283 | Hyal3         | 0.0000 | No |
| 34284 | Hyal4         | 0.0000 | No |
| 34285 | Hyal6         | 0.0000 | No |
| 34286 | Hydin         | 0.0000 | No |
| 34287 | Hyi           | 0.0000 | No |
| 34288 | Hykk          | 0.0000 | No |
| 34289 | Hyls1         | 0.0000 | No |
| 34290 | Hypk          | 0.0000 | No |
| 34291 | Hypm          | 0.0000 | No |
| 34292 | I0C0044D17Rik | 0.0000 | No |
| 34293 | I830077J02Rik | 0.0000 | No |
| 34294 | I830134H01Rik | 0.0000 | No |
| 34295 | Iah1          | 0.0000 | No |
| 34296 | Iapp          | 0.0000 | No |
| 34297 | Iars          | 0.0000 | No |
| 34298 | Iars2         | 0.0000 | No |
| 34299 | Iba57         | 0.0000 | No |
| 34300 | Ibsp          | 0.0000 | No |
| 34301 | Ibtk          | 0.0000 | No |
| 34302 | Ica1          | 0.0000 | No |
| 34303 | Ica11         | 0.0000 | No |
| 34304 | Icam1         | 0.0000 | No |
| 34305 | Icam2         | 0.0000 | No |
| 34306 | Icam4         | 0.0000 | No |
| 34307 | Icam5         | 0.0000 | No |
| 34308 | Ice1          | 0.0000 | No |
| 34309 | Ice2          | 0.0000 | No |
| 34310 | Ick           | 0.0000 | No |
| 34311 | Icmt          | 0.0000 | No |
| 34312 | Icosl         | 0.0000 | No |
| 34313 | Ict1os        | 0.0000 | No |

|       |          |        |    |
|-------|----------|--------|----|
| 34314 | Id1      | 0.0000 | No |
| 34315 | Ide      | 0.0000 | No |
| 34316 | Idh1     | 0.0000 | No |
| 34317 | Idh2     | 0.0000 | No |
| 34318 | Idh3a    | 0.0000 | No |
| 34319 | Idh3b    | 0.0000 | No |
| 34320 | Idh3g    | 0.0000 | No |
| 34321 | Idi1     | 0.0000 | No |
| 34322 | Idi2     | 0.0000 | No |
| 34323 | Idnk     | 0.0000 | No |
| 34324 | Ido1     | 0.0000 | No |
| 34325 | Ido2     | 0.0000 | No |
| 34326 | Ids      | 0.0000 | No |
| 34327 | Idua     | 0.0000 | No |
| 34328 | Ier2     | 0.0000 | No |
| 34329 | Ier3     | 0.0000 | No |
| 34330 | Ier3ip1  | 0.0000 | No |
| 34331 | Ier5     | 0.0000 | No |
| 34332 | Ier5l    | 0.0000 | No |
| 34333 | Iffo1    | 0.0000 | No |
| 34334 | Iffo2    | 0.0000 | No |
| 34335 | Ifi202b  | 0.0000 | No |
| 34336 | Ifi203   | 0.0000 | No |
| 34337 | Ifi204   | 0.0000 | No |
| 34338 | Ifi205   | 0.0000 | No |
| 34339 | Ifi206   | 0.0000 | No |
| 34340 | Ifi207   | 0.0000 | No |
| 34341 | Ifi208   | 0.0000 | No |
| 34342 | Ifi209   | 0.0000 | No |
| 34343 | Ifi211   | 0.0000 | No |
| 34344 | Ifi213   | 0.0000 | No |
| 34345 | Ifi214   | 0.0000 | No |
| 34346 | Ifi27    | 0.0000 | No |
| 34347 | Ifi27l2b | 0.0000 | No |
| 34348 | Ifi35    | 0.0000 | No |
| 34349 | Ifi44    | 0.0000 | No |
| 34350 | Ifi44l   | 0.0000 | No |
| 34351 | Ifi47    | 0.0000 | No |
| 34352 | Ifih1    | 0.0000 | No |
| 34353 | Ifit1    | 0.0000 | No |
| 34354 | Ifit1b1l | 0.0000 | No |
| 34355 | Ifit1b12 | 0.0000 | No |
| 34356 | Ifit2    | 0.0000 | No |
| 34357 | Ifit3    | 0.0000 | No |
| 34358 | Ifit3b   | 0.0000 | No |
| 34359 | Ifitm1   | 0.0000 | No |

|       |          |        |    |
|-------|----------|--------|----|
| 34360 | Ifitm10  | 0.0000 | No |
| 34361 | Ifitm2   | 0.0000 | No |
| 34362 | Ifitm3   | 0.0000 | No |
| 34363 | Ifitm5   | 0.0000 | No |
| 34364 | Ifitm6   | 0.0000 | No |
| 34365 | Ifna1    | 0.0000 | No |
| 34366 | Ifna12   | 0.0000 | No |
| 34367 | Ifna13   | 0.0000 | No |
| 34368 | Ifna14   | 0.0000 | No |
| 34369 | Ifna16   | 0.0000 | No |
| 34370 | Ifna4    | 0.0000 | No |
| 34371 | Ifna5    | 0.0000 | No |
| 34372 | Ifna6    | 0.0000 | No |
| 34373 | Ifna7    | 0.0000 | No |
| 34374 | Ifna9    | 0.0000 | No |
| 34375 | Ifnab    | 0.0000 | No |
| 34376 | Ifna-ps1 | 0.0000 | No |
| 34377 | Ifnar1   | 0.0000 | No |
| 34378 | Ifnar2   | 0.0000 | No |
| 34379 | Ifnb1    | 0.0000 | No |
| 34380 | Ifne     | 0.0000 | No |
| 34381 | Ifng     | 0.0000 | No |
| 34382 | Ifngr1   | 0.0000 | No |
| 34383 | Ifngr2   | 0.0000 | No |
| 34384 | Ifnk     | 0.0000 | No |
| 34385 | Ifnl2    | 0.0000 | No |
| 34386 | Ifnl3    | 0.0000 | No |
| 34387 | Ifnlr1   | 0.0000 | No |
| 34388 | Ifnz     | 0.0000 | No |
| 34389 | Ifrd1    | 0.0000 | No |
| 34390 | Ifrd2    | 0.0000 | No |
| 34391 | Ift122   | 0.0000 | No |
| 34392 | Ift140   | 0.0000 | No |
| 34393 | Ift172   | 0.0000 | No |
| 34394 | Ift20    | 0.0000 | No |
| 34395 | Ift22    | 0.0000 | No |
| 34396 | Ift27    | 0.0000 | No |
| 34397 | Ift43    | 0.0000 | No |
| 34398 | Ift46    | 0.0000 | No |
| 34399 | Ift52    | 0.0000 | No |
| 34400 | Ift57    | 0.0000 | No |
| 34401 | Ift74    | 0.0000 | No |
| 34402 | Ift80    | 0.0000 | No |
| 34403 | Ift81    | 0.0000 | No |
| 34404 | Ift88    | 0.0000 | No |
| 34405 | Ift88os  | 0.0000 | No |

|       |          |        |    |
|-------|----------|--------|----|
| 34406 | Igbp1    | 0.0000 | No |
| 34407 | Igdcc3   | 0.0000 | No |
| 34408 | Igdcc4   | 0.0000 | No |
| 34409 | Igf1os   | 0.0000 | No |
| 34410 | Igf1r    | 0.0000 | No |
| 34411 | Igf2bp1  | 0.0000 | No |
| 34412 | Igf2bp2  | 0.0000 | No |
| 34413 | Igf2bp3  | 0.0000 | No |
| 34414 | Igf2r    | 0.0000 | No |
| 34415 | Igfals   | 0.0000 | No |
| 34416 | Igfbp1   | 0.0000 | No |
| 34417 | Igfbp2   | 0.0000 | No |
| 34418 | Igfbp4   | 0.0000 | No |
| 34419 | Igfbp5   | 0.0000 | No |
| 34420 | Igfbp7   | 0.0000 | No |
| 34421 | Igfbp11  | 0.0000 | No |
| 34422 | Igf13    | 0.0000 | No |
| 34423 | Igflr1   | 0.0000 | No |
| 34424 | Igfn1    | 0.0000 | No |
| 34425 | Igha     | 0.0000 | No |
| 34426 | Ighd2-3  | 0.0000 | No |
| 34427 | Ighd2-4  | 0.0000 | No |
| 34428 | Ighd2-6  | 0.0000 | No |
| 34429 | Ighd2-7  | 0.0000 | No |
| 34430 | Ighd2-8  | 0.0000 | No |
| 34431 | Ighd3-1  | 0.0000 | No |
| 34432 | Ighd3-2  | 0.0000 | No |
| 34433 | Ighd5-1  | 0.0000 | No |
| 34434 | Ighd5-2  | 0.0000 | No |
| 34435 | Ighd5-3  | 0.0000 | No |
| 34436 | Ighd5-4  | 0.0000 | No |
| 34437 | Ighd5-5  | 0.0000 | No |
| 34438 | Ighd5-6  | 0.0000 | No |
| 34439 | Ighd5-7  | 0.0000 | No |
| 34440 | Ighd5-8  | 0.0000 | No |
| 34441 | Ighd6-1  | 0.0000 | No |
| 34442 | Ighd6-2  | 0.0000 | No |
| 34443 | Ighe     | 0.0000 | No |
| 34444 | Ighg1    | 0.0000 | No |
| 34445 | Ighg2c   | 0.0000 | No |
| 34446 | Ighg3    | 0.0000 | No |
| 34447 | Ighmbp2  | 0.0000 | No |
| 34448 | Ighv10-2 | 0.0000 | No |
| 34449 | Ighv10-4 | 0.0000 | No |
| 34450 | Ighv1-1  | 0.0000 | No |
| 34451 | Ighv1-10 | 0.0000 | No |

|       |            |        |    |
|-------|------------|--------|----|
| 34452 | Ighv1-11   | 0.0000 | No |
| 34453 | Ighv11-1   | 0.0000 | No |
| 34454 | Ighv1-12   | 0.0000 | No |
| 34455 | Ighv11-2   | 0.0000 | No |
| 34456 | Ighv1-13   | 0.0000 | No |
| 34457 | Ighv1-14   | 0.0000 | No |
| 34458 | Ighv1-16   | 0.0000 | No |
| 34459 | Ighv1-17   | 0.0000 | No |
| 34460 | Ighv1-17-1 | 0.0000 | No |
| 34461 | Ighv1-2    | 0.0000 | No |
| 34462 | Ighv1-20   | 0.0000 | No |
| 34463 | Ighv1-21   | 0.0000 | No |
| 34464 | Ighv12-1   | 0.0000 | No |
| 34465 | Ighv1-21-1 | 0.0000 | No |
| 34466 | Ighv12-2   | 0.0000 | No |
| 34467 | Ighv1-23   | 0.0000 | No |
| 34468 | Ighv1-24   | 0.0000 | No |
| 34469 | Ighv1-25   | 0.0000 | No |
| 34470 | Ighv1-27   | 0.0000 | No |
| 34471 | Ighv1-28   | 0.0000 | No |
| 34472 | Ighv1-29   | 0.0000 | No |
| 34473 | Ighv1-3    | 0.0000 | No |
| 34474 | Ighv1-31   | 0.0000 | No |
| 34475 | Ighv13-1   | 0.0000 | No |
| 34476 | Ighv1-32   | 0.0000 | No |
| 34477 | Ighv13-2   | 0.0000 | No |
| 34478 | Ighv1-37   | 0.0000 | No |
| 34479 | Ighv1-4    | 0.0000 | No |
| 34480 | Ighv1-40   | 0.0000 | No |
| 34481 | Ighv1-44   | 0.0000 | No |
| 34482 | Ighv14-4   | 0.0000 | No |
| 34483 | Ighv1-45   | 0.0000 | No |
| 34484 | Ighv1-46   | 0.0000 | No |
| 34485 | Ighv1-49   | 0.0000 | No |
| 34486 | Ighv15-1   | 0.0000 | No |
| 34487 | Ighv15-2   | 0.0000 | No |
| 34488 | Ighv1-58   | 0.0000 | No |
| 34489 | Ighv1-6    | 0.0000 | No |
| 34490 | Ighv1-60   | 0.0000 | No |
| 34491 | Ighv1-62   | 0.0000 | No |
| 34492 | Ighv1-65   | 0.0000 | No |
| 34493 | Ighv1-77   | 0.0000 | No |
| 34494 | Ighv1-8    | 0.0000 | No |
| 34495 | Ighv1-83   | 0.0000 | No |
| 34496 | Ighv1-84   | 0.0000 | No |
| 34497 | Ighv1-86   | 0.0000 | No |

|       |            |        |    |
|-------|------------|--------|----|
| 34498 | Ighv2-1    | 0.0000 | No |
| 34499 | Ighv2-9    | 0.0000 | No |
| 34500 | Ighv3-2    | 0.0000 | No |
| 34501 | Ighv3-4    | 0.0000 | No |
| 34502 | Ighv3-5    | 0.0000 | No |
| 34503 | Ighv3-8    | 0.0000 | No |
| 34504 | Ighv4-1    | 0.0000 | No |
| 34505 | Ighv4-2    | 0.0000 | No |
| 34506 | Ighv5-1    | 0.0000 | No |
| 34507 | Ighv5-10   | 0.0000 | No |
| 34508 | Ighv5-11   | 0.0000 | No |
| 34509 | Ighv5-12-4 | 0.0000 | No |
| 34510 | Ighv5-13   | 0.0000 | No |
| 34511 | Ighv5-15   | 0.0000 | No |
| 34512 | Ighv5-18   | 0.0000 | No |
| 34513 | Ighv5-19   | 0.0000 | No |
| 34514 | Ighv5-5    | 0.0000 | No |
| 34515 | Ighv5-7    | 0.0000 | No |
| 34516 | Ighv5-8    | 0.0000 | No |
| 34517 | Ighv6-1    | 0.0000 | No |
| 34518 | Ighv6-2    | 0.0000 | No |
| 34519 | Ighv6-3    | 0.0000 | No |
| 34520 | Ighv6-4    | 0.0000 | No |
| 34521 | Ighv6-5    | 0.0000 | No |
| 34522 | Ighv6-6    | 0.0000 | No |
| 34523 | Ighv6-7    | 0.0000 | No |
| 34524 | Ighv8-1    | 0.0000 | No |
| 34525 | Ighv8-13   | 0.0000 | No |
| 34526 | Ighv8-16   | 0.0000 | No |
| 34527 | Ighv8-3    | 0.0000 | No |
| 34528 | Ighv8-4    | 0.0000 | No |
| 34529 | Ighv8-6    | 0.0000 | No |
| 34530 | Ighv9-4    | 0.0000 | No |
| 34531 | Igip       | 0.0000 | No |
| 34532 | Igkv10-95  | 0.0000 | No |
| 34533 | Igkv10-96  | 0.0000 | No |
| 34534 | Igkv1-108  | 0.0000 | No |
| 34535 | Igkv11-106 | 0.0000 | No |
| 34536 | Igkv1-115  | 0.0000 | No |
| 34537 | Igkv1-131  | 0.0000 | No |
| 34538 | Igkv1-132  | 0.0000 | No |
| 34539 | Igkv1-133  | 0.0000 | No |
| 34540 | Igkv1-135  | 0.0000 | No |
| 34541 | Igkv1-136  | 0.0000 | No |
| 34542 | Igkv12-40  | 0.0000 | No |
| 34543 | Igkv12-41  | 0.0000 | No |

|       |              |        |    |
|-------|--------------|--------|----|
| 34544 | Igkv12-42    | 0.0000 | No |
| 34545 | Igkv12-46    | 0.0000 | No |
| 34546 | Igkv12-47    | 0.0000 | No |
| 34547 | Igkv12-49    | 0.0000 | No |
| 34548 | Igkv12-66    | 0.0000 | No |
| 34549 | Igkv1-35     | 0.0000 | No |
| 34550 | Igkv13-54-1  | 0.0000 | No |
| 34551 | Igkv13-55-1  | 0.0000 | No |
| 34552 | Igkv13-56-1  | 0.0000 | No |
| 34553 | Igkv13-57-1  | 0.0000 | No |
| 34554 | Igkv13-71-1  | 0.0000 | No |
| 34555 | Igkv13-73-1  | 0.0000 | No |
| 34556 | Igkv13-76    | 0.0000 | No |
| 34557 | Igkv13-78-1  | 0.0000 | No |
| 34558 | Igkv13-80-1  | 0.0000 | No |
| 34559 | Igkv13-82    | 0.0000 | No |
| 34560 | Igkv13-84    | 0.0000 | No |
| 34561 | Igkv13-85    | 0.0000 | No |
| 34562 | Igkv13-87    | 0.0000 | No |
| 34563 | Igkv14-111   | 0.0000 | No |
| 34564 | Igkv14-118-1 | 0.0000 | No |
| 34565 | Igkv14-118-2 | 0.0000 | No |
| 34566 | Igkv14-126-1 | 0.0000 | No |
| 34567 | Igkv14-130   | 0.0000 | No |
| 34568 | Igkv14-134-1 | 0.0000 | No |
| 34569 | Igkv15-101-1 | 0.0000 | No |
| 34570 | Igkv15-97    | 0.0000 | No |
| 34571 | Igkv16-104   | 0.0000 | No |
| 34572 | Igkv17-127   | 0.0000 | No |
| 34573 | Igkv17-134   | 0.0000 | No |
| 34574 | Igkv1-99     | 0.0000 | No |
| 34575 | Igkv2-105    | 0.0000 | No |
| 34576 | Igkv2-107    | 0.0000 | No |
| 34577 | Igkv2-113    | 0.0000 | No |
| 34578 | Igkv2-116    | 0.0000 | No |
| 34579 | Igkv2-137    | 0.0000 | No |
| 34580 | Igkv2-93-1   | 0.0000 | No |
| 34581 | Igkv2-95-1   | 0.0000 | No |
| 34582 | Igkv3-1      | 0.0000 | No |
| 34583 | Igkv3-10     | 0.0000 | No |
| 34584 | Igkv3-11     | 0.0000 | No |
| 34585 | Igkv3-12-1   | 0.0000 | No |
| 34586 | Igkv3-3      | 0.0000 | No |
| 34587 | Igkv3-5      | 0.0000 | No |
| 34588 | Igkv3-6      | 0.0000 | No |
| 34589 | Igkv3-8      | 0.0000 | No |



|       |            |        |    |
|-------|------------|--------|----|
| 34590 | Igkv3-9    | 0.0000 | No |
| 34591 | Igkv4-51   | 0.0000 | No |
| 34592 | Igkv4-54   | 0.0000 | No |
| 34593 | Igkv4-55   | 0.0000 | No |
| 34594 | Igkv4-56   | 0.0000 | No |
| 34595 | Igkv4-59   | 0.0000 | No |
| 34596 | Igkv4-60   | 0.0000 | No |
| 34597 | Igkv4-61   | 0.0000 | No |
| 34598 | Igkv4-62   | 0.0000 | No |
| 34599 | Igkv4-65   | 0.0000 | No |
| 34600 | Igkv4-68   | 0.0000 | No |
| 34601 | Igkv4-70   | 0.0000 | No |
| 34602 | Igkv4-71   | 0.0000 | No |
| 34603 | Igkv4-72   | 0.0000 | No |
| 34604 | Igkv4-73   | 0.0000 | No |
| 34605 | Igkv4-75   | 0.0000 | No |
| 34606 | Igkv4-77   | 0.0000 | No |
| 34607 | Igkv4-79   | 0.0000 | No |
| 34608 | Igkv4-81   | 0.0000 | No |
| 34609 | Igkv4-86   | 0.0000 | No |
| 34610 | Igkv4-90   | 0.0000 | No |
| 34611 | Igkv4-91   | 0.0000 | No |
| 34612 | Igkv4-92   | 0.0000 | No |
| 34613 | Igkv5-37   | 0.0000 | No |
| 34614 | Igkv5-39   | 0.0000 | No |
| 34615 | Igkv5-40-1 | 0.0000 | No |
| 34616 | Igkv5-43   | 0.0000 | No |
| 34617 | Igkv5-45   | 0.0000 | No |
| 34618 | Igkv6-20   | 0.0000 | No |
| 34619 | Igkv6-29   | 0.0000 | No |
| 34620 | Igkv8-16   | 0.0000 | No |
| 34621 | Igkv8-21   | 0.0000 | No |
| 34622 | Igkv8-22   | 0.0000 | No |
| 34623 | Igkv8-27   | 0.0000 | No |
| 34624 | Igkv8-28   | 0.0000 | No |
| 34625 | Igkv8-31   | 0.0000 | No |
| 34626 | Igkv8-34   | 0.0000 | No |
| 34627 | Igkv9-119  | 0.0000 | No |
| 34628 | Igkv9-120  | 0.0000 | No |
| 34629 | Igkv9-128  | 0.0000 | No |
| 34630 | Iglc3      | 0.0000 | No |
| 34631 | Iglj2      | 0.0000 | No |
| 34632 | Iglj4      | 0.0000 | No |
| 34633 | Igl11      | 0.0000 | No |
| 34634 | Iglon5     | 0.0000 | No |
| 34635 | Igsf1      | 0.0000 | No |

|       |         |        |    |
|-------|---------|--------|----|
| 34636 | Igsf10  | 0.0000 | No |
| 34637 | Igsf11  | 0.0000 | No |
| 34638 | Igsf23  | 0.0000 | No |
| 34639 | Igsf3   | 0.0000 | No |
| 34640 | Igsf6   | 0.0000 | No |
| 34641 | Igsf8   | 0.0000 | No |
| 34642 | Igsf9   | 0.0000 | No |
| 34643 | Igsf9b  | 0.0000 | No |
| 34644 | Igtp    | 0.0000 | No |
| 34645 | Igp1    | 0.0000 | No |
| 34646 | Ik      | 0.0000 | No |
| 34647 | Ikbkap  | 0.0000 | No |
| 34648 | Ikbkb   | 0.0000 | No |
| 34649 | Ikbke   | 0.0000 | No |
| 34650 | Ikbkg   | 0.0000 | No |
| 34651 | Ikzf1   | 0.0000 | No |
| 34652 | Ikzf3   | 0.0000 | No |
| 34653 | Ikzf4   | 0.0000 | No |
| 34654 | Ikzf5   | 0.0000 | No |
| 34655 | Il10    | 0.0000 | No |
| 34656 | Il10ra  | 0.0000 | No |
| 34657 | Il10rb  | 0.0000 | No |
| 34658 | Il11    | 0.0000 | No |
| 34659 | Il11ra1 | 0.0000 | No |
| 34660 | Il11ra2 | 0.0000 | No |
| 34661 | Il12rb2 | 0.0000 | No |
| 34662 | Il13ra2 | 0.0000 | No |
| 34663 | Il15    | 0.0000 | No |
| 34664 | Il15ra  | 0.0000 | No |
| 34665 | Il16    | 0.0000 | No |
| 34666 | Il17a   | 0.0000 | No |
| 34667 | Il17b   | 0.0000 | No |
| 34668 | Il17c   | 0.0000 | No |
| 34669 | Il17d   | 0.0000 | No |
| 34670 | Il17f   | 0.0000 | No |
| 34671 | Il17ra  | 0.0000 | No |
| 34672 | Il17rb  | 0.0000 | No |
| 34673 | Il18    | 0.0000 | No |
| 34674 | Il18bp  | 0.0000 | No |
| 34675 | Il18rap | 0.0000 | No |
| 34676 | Il19    | 0.0000 | No |
| 34677 | Il1b    | 0.0000 | No |
| 34678 | Il1bos  | 0.0000 | No |
| 34679 | Il1f10  | 0.0000 | No |
| 34680 | Il1f5   | 0.0000 | No |
| 34681 | Il1f6   | 0.0000 | No |

|       |          |        |    |
|-------|----------|--------|----|
| 34682 | Il1f8    | 0.0000 | No |
| 34683 | Il1f9    | 0.0000 | No |
| 34684 | Il1r1    | 0.0000 | No |
| 34685 | Il1r2    | 0.0000 | No |
| 34686 | Il1rap   | 0.0000 | No |
| 34687 | Il1rap11 | 0.0000 | No |
| 34688 | Il1rap12 | 0.0000 | No |
| 34689 | Il1rl1   | 0.0000 | No |
| 34690 | Il1rl2   | 0.0000 | No |
| 34691 | Il1rn    | 0.0000 | No |
| 34692 | Il20     | 0.0000 | No |
| 34693 | Il20ra   | 0.0000 | No |
| 34694 | Il20rb   | 0.0000 | No |
| 34695 | Il21     | 0.0000 | No |
| 34696 | Il22     | 0.0000 | No |
| 34697 | Il22ra1  | 0.0000 | No |
| 34698 | Il23a    | 0.0000 | No |
| 34699 | Il23r    | 0.0000 | No |
| 34700 | Il25     | 0.0000 | No |
| 34701 | Il27ra   | 0.0000 | No |
| 34702 | Il2ra    | 0.0000 | No |
| 34703 | Il2rb    | 0.0000 | No |
| 34704 | Il2rg    | 0.0000 | No |
| 34705 | Il31ra   | 0.0000 | No |
| 34706 | Il33     | 0.0000 | No |
| 34707 | Il34     | 0.0000 | No |
| 34708 | Il3ra    | 0.0000 | No |
| 34709 | Il4      | 0.0000 | No |
| 34710 | Il4i1    | 0.0000 | No |
| 34711 | Il4ra    | 0.0000 | No |
| 34712 | Il5ra    | 0.0000 | No |
| 34713 | Il6      | 0.0000 | No |
| 34714 | Il6st    | 0.0000 | No |
| 34715 | Il7      | 0.0000 | No |
| 34716 | Il7r     | 0.0000 | No |
| 34717 | Il9      | 0.0000 | No |
| 34718 | Il9r     | 0.0000 | No |
| 34719 | Il1dr1   | 0.0000 | No |
| 34720 | Il1dr2   | 0.0000 | No |
| 34721 | Il1f2    | 0.0000 | No |
| 34722 | Il1f3    | 0.0000 | No |
| 34723 | Ilk      | 0.0000 | No |
| 34724 | Ilkap    | 0.0000 | No |
| 34725 | Il1tifb  | 0.0000 | No |
| 34726 | Ilvbl    | 0.0000 | No |
| 34727 | Imm11    | 0.0000 | No |

|       |          |        |    |
|-------|----------|--------|----|
| 34728 | Immp21   | 0.0000 | No |
| 34729 | Immt     | 0.0000 | No |
| 34730 | Imp3     | 0.0000 | No |
| 34731 | Imp4     | 0.0000 | No |
| 34732 | Impa1    | 0.0000 | No |
| 34733 | Impa2    | 0.0000 | No |
| 34734 | Impact   | 0.0000 | No |
| 34735 | Impad1   | 0.0000 | No |
| 34736 | Impdh1   | 0.0000 | No |
| 34737 | Impdh2   | 0.0000 | No |
| 34738 | Impg1    | 0.0000 | No |
| 34739 | Impg2    | 0.0000 | No |
| 34740 | Ina      | 0.0000 | No |
| 34741 | Inafm1   | 0.0000 | No |
| 34742 | Inafm2   | 0.0000 | No |
| 34743 | Inca1    | 0.0000 | No |
| 34744 | Incenp   | 0.0000 | No |
| 34745 | Inf2     | 0.0000 | No |
| 34746 | Ing1     | 0.0000 | No |
| 34747 | Ing2     | 0.0000 | No |
| 34748 | Ing3     | 0.0000 | No |
| 34749 | Ing4     | 0.0000 | No |
| 34750 | Ing5     | 0.0000 | No |
| 34751 | Inhba    | 0.0000 | No |
| 34752 | Inhbb    | 0.0000 | No |
| 34753 | Inhbc    | 0.0000 | No |
| 34754 | Inip     | 0.0000 | No |
| 34755 | Inmt     | 0.0000 | No |
| 34756 | Ino80    | 0.0000 | No |
| 34757 | Ino80b   | 0.0000 | No |
| 34758 | Ino80c   | 0.0000 | No |
| 34759 | Ino80d   | 0.0000 | No |
| 34760 | Ino80dos | 0.0000 | No |
| 34761 | Ino80e   | 0.0000 | No |
| 34762 | Inpp1    | 0.0000 | No |
| 34763 | Inpp4a   | 0.0000 | No |
| 34764 | Inpp4b   | 0.0000 | No |
| 34765 | Inpp5a   | 0.0000 | No |
| 34766 | Inpp5e   | 0.0000 | No |
| 34767 | Inpp5f   | 0.0000 | No |
| 34768 | Inpp5j   | 0.0000 | No |
| 34769 | Inpp5k   | 0.0000 | No |
| 34770 | Inpp11   | 0.0000 | No |
| 34771 | Ins1     | 0.0000 | No |
| 34772 | Ins2     | 0.0000 | No |
| 34773 | Insig1   | 0.0000 | No |

|       |        |        |    |
|-------|--------|--------|----|
| 34774 | Insig2 | 0.0000 | No |
| 34775 | Insl3  | 0.0000 | No |
| 34776 | Insl6  | 0.0000 | No |
| 34777 | Insm2  | 0.0000 | No |
| 34778 | Insr   | 0.0000 | No |
| 34779 | Insrr  | 0.0000 | No |
| 34780 | Ints1  | 0.0000 | No |
| 34781 | Ints10 | 0.0000 | No |
| 34782 | Ints12 | 0.0000 | No |
| 34783 | Ints2  | 0.0000 | No |
| 34784 | Ints3  | 0.0000 | No |
| 34785 | Ints4  | 0.0000 | No |
| 34786 | Ints5  | 0.0000 | No |
| 34787 | Ints6  | 0.0000 | No |
| 34788 | Ints6l | 0.0000 | No |
| 34789 | Ints7  | 0.0000 | No |
| 34790 | Ints9  | 0.0000 | No |
| 34791 | Intu   | 0.0000 | No |
| 34792 | Invs   | 0.0000 | No |
| 34793 | Ip6k1  | 0.0000 | No |
| 34794 | Ip6k2  | 0.0000 | No |
| 34795 | Ip6k3  | 0.0000 | No |
| 34796 | Ipmk   | 0.0000 | No |
| 34797 | Ipo11  | 0.0000 | No |
| 34798 | Ipo13  | 0.0000 | No |
| 34799 | Ipo4   | 0.0000 | No |
| 34800 | Ipo5   | 0.0000 | No |
| 34801 | Ipo7   | 0.0000 | No |
| 34802 | Ipo8   | 0.0000 | No |
| 34803 | Ipo9   | 0.0000 | No |
| 34804 | Ipp    | 0.0000 | No |
| 34805 | Ippk   | 0.0000 | No |
| 34806 | Iqca   | 0.0000 | No |
| 34807 | Iqcb1  | 0.0000 | No |
| 34808 | Iqcc   | 0.0000 | No |
| 34809 | Iqcd   | 0.0000 | No |
| 34810 | Iqce   | 0.0000 | No |
| 34811 | Iqcf1  | 0.0000 | No |
| 34812 | Iqcf4  | 0.0000 | No |
| 34813 | Iqcf5  | 0.0000 | No |
| 34814 | Iqcf6  | 0.0000 | No |
| 34815 | Iqcg   | 0.0000 | No |
| 34816 | Iqck   | 0.0000 | No |
| 34817 | Iqgap1 | 0.0000 | No |
| 34818 | Iqgap2 | 0.0000 | No |
| 34819 | Iqgap3 | 0.0000 | No |

|       |          |        |    |
|-------|----------|--------|----|
| 34820 | Iqsec1   | 0.0000 | No |
| 34821 | Iqsec2   | 0.0000 | No |
| 34822 | Iqsec3   | 0.0000 | No |
| 34823 | Iqub     | 0.0000 | No |
| 34824 | Irak1    | 0.0000 | No |
| 34825 | Irak1bp1 | 0.0000 | No |
| 34826 | Irak2    | 0.0000 | No |
| 34827 | Irak3    | 0.0000 | No |
| 34828 | Ireb2    | 0.0000 | No |
| 34829 | Irf1     | 0.0000 | No |
| 34830 | Irf2     | 0.0000 | No |
| 34831 | Irf2bp1  | 0.0000 | No |
| 34832 | Irf2bp2  | 0.0000 | No |
| 34833 | Irf3     | 0.0000 | No |
| 34834 | Irf4     | 0.0000 | No |
| 34835 | Irf5     | 0.0000 | No |
| 34836 | Irf6     | 0.0000 | No |
| 34837 | Irf7     | 0.0000 | No |
| 34838 | Irf9     | 0.0000 | No |
| 34839 | Irgm1    | 0.0000 | No |
| 34840 | Irgm2    | 0.0000 | No |
| 34841 | Irgq     | 0.0000 | No |
| 34842 | Irs2     | 0.0000 | No |
| 34843 | Irs4     | 0.0000 | No |
| 34844 | Irx3     | 0.0000 | No |
| 34845 | Irx3os   | 0.0000 | No |
| 34846 | Irx4     | 0.0000 | No |
| 34847 | Irx5     | 0.0000 | No |
| 34848 | Irx6     | 0.0000 | No |
| 34849 | Isca1    | 0.0000 | No |
| 34850 | Isca2    | 0.0000 | No |
| 34851 | Iscu     | 0.0000 | No |
| 34852 | Isg15    | 0.0000 | No |
| 34853 | Isg20    | 0.0000 | No |
| 34854 | Isg20l2  | 0.0000 | No |
| 34855 | Isl1     | 0.0000 | No |
| 34856 | Isl2     | 0.0000 | No |
| 34857 | Islr     | 0.0000 | No |
| 34858 | Ism1     | 0.0000 | No |
| 34859 | Ism2     | 0.0000 | No |
| 34860 | Isoc1    | 0.0000 | No |
| 34861 | Isoc2a   | 0.0000 | No |
| 34862 | Isoc2b   | 0.0000 | No |
| 34863 | Ispd     | 0.0000 | No |
| 34864 | Ist1     | 0.0000 | No |
| 34865 | Isy1     | 0.0000 | No |

|       |           |        |    |
|-------|-----------|--------|----|
| 34866 | Isyna1    | 0.0000 | No |
| 34867 | Itfg1     | 0.0000 | No |
| 34868 | Itfg2     | 0.0000 | No |
| 34869 | Itga1     | 0.0000 | No |
| 34870 | Itga10    | 0.0000 | No |
| 34871 | Itga11    | 0.0000 | No |
| 34872 | Itga2b    | 0.0000 | No |
| 34873 | Itga3     | 0.0000 | No |
| 34874 | Itga4     | 0.0000 | No |
| 34875 | Itga5     | 0.0000 | No |
| 34876 | Itga6     | 0.0000 | No |
| 34877 | Itga7     | 0.0000 | No |
| 34878 | Itga8     | 0.0000 | No |
| 34879 | Itga9     | 0.0000 | No |
| 34880 | Itgad     | 0.0000 | No |
| 34881 | Itgae     | 0.0000 | No |
| 34882 | Itgal     | 0.0000 | No |
| 34883 | Itgam     | 0.0000 | No |
| 34884 | Itgav     | 0.0000 | No |
| 34885 | Itgax     | 0.0000 | No |
| 34886 | Itgb1     | 0.0000 | No |
| 34887 | Itgb1bp1  | 0.0000 | No |
| 34888 | Itgb1bp2  | 0.0000 | No |
| 34889 | Itgb2     | 0.0000 | No |
| 34890 | Itgb3     | 0.0000 | No |
| 34891 | Itgb3bp   | 0.0000 | No |
| 34892 | Itgb4     | 0.0000 | No |
| 34893 | Itgb5     | 0.0000 | No |
| 34894 | Itgb6     | 0.0000 | No |
| 34895 | Itgb7     | 0.0000 | No |
| 34896 | Itgb8     | 0.0000 | No |
| 34897 | Itgb11    | 0.0000 | No |
| 34898 | Itih1     | 0.0000 | No |
| 34899 | Itih2     | 0.0000 | No |
| 34900 | Itih3     | 0.0000 | No |
| 34901 | Itih4     | 0.0000 | No |
| 34902 | Itih51-ps | 0.0000 | No |
| 34903 | Itm2a     | 0.0000 | No |
| 34904 | Itm2b     | 0.0000 | No |
| 34905 | Itm2c     | 0.0000 | No |
| 34906 | Itpa      | 0.0000 | No |
| 34907 | Itpa-ps1  | 0.0000 | No |
| 34908 | Itpa-ps3  | 0.0000 | No |
| 34909 | Itpk1     | 0.0000 | No |
| 34910 | Itpka     | 0.0000 | No |
| 34911 | Itpkb     | 0.0000 | No |

|       |          |        |    |
|-------|----------|--------|----|
| 34912 | Itpkc    | 0.0000 | No |
| 34913 | Itp1     | 0.0000 | No |
| 34914 | Itp2     | 0.0000 | No |
| 34915 | Itp3os   | 0.0000 | No |
| 34916 | Itp1p1   | 0.0000 | No |
| 34917 | Itp1p2   | 0.0000 | No |
| 34918 | Itsn1    | 0.0000 | No |
| 34919 | Itsn2    | 0.0000 | No |
| 34920 | Ivd      | 0.0000 | No |
| 34921 | Ivns1abp | 0.0000 | No |
| 34922 | Iws1     | 0.0000 | No |
| 34923 | Iyd      | 0.0000 | No |
| 34924 | Izumo1   | 0.0000 | No |
| 34925 | Izumo1r  | 0.0000 | No |
| 34926 | Izumo3   | 0.0000 | No |
| 34927 | Izumo4   | 0.0000 | No |
| 34928 | Jade1    | 0.0000 | No |
| 34929 | Jade2    | 0.0000 | No |
| 34930 | Jade3    | 0.0000 | No |
| 34931 | Jagn1    | 0.0000 | No |
| 34932 | Jak1     | 0.0000 | No |
| 34933 | Jak2     | 0.0000 | No |
| 34934 | Jak3     | 0.0000 | No |
| 34935 | Jakmip1  | 0.0000 | No |
| 34936 | Jakmip2  | 0.0000 | No |
| 34937 | Jakmip3  | 0.0000 | No |
| 34938 | Jam2     | 0.0000 | No |
| 34939 | Jam3     | 0.0000 | No |
| 34940 | Jarid2   | 0.0000 | No |
| 34941 | Jazf1    | 0.0000 | No |
| 34942 | Jchain   | 0.0000 | No |
| 34943 | Jdp2     | 0.0000 | No |
| 34944 | Jhy      | 0.0000 | No |
| 34945 | Jkamp    | 0.0000 | No |
| 34946 | Jmjd1c   | 0.0000 | No |
| 34947 | Jmjd4    | 0.0000 | No |
| 34948 | Jmjd6    | 0.0000 | No |
| 34949 | Jmjd7    | 0.0000 | No |
| 34950 | Jmjd8    | 0.0000 | No |
| 34951 | Jmy      | 0.0000 | No |
| 34952 | Josd1    | 0.0000 | No |
| 34953 | Jph1     | 0.0000 | No |
| 34954 | Jph2     | 0.0000 | No |
| 34955 | Jph3     | 0.0000 | No |
| 34956 | Jph4     | 0.0000 | No |
| 34957 | Jpx      | 0.0000 | No |



|       |               |        |    |
|-------|---------------|--------|----|
| 34958 | Jrk           | 0.0000 | No |
| 34959 | Jrkl          | 0.0000 | No |
| 34960 | Jsrp1         | 0.0000 | No |
| 34961 | Jtb           | 0.0000 | No |
| 34962 | Jun           | 0.0000 | No |
| 34963 | Junb          | 0.0000 | No |
| 34964 | Jund          | 0.0000 | No |
| 34965 | Junos         | 0.0000 | No |
| 34966 | Jup           | 0.0000 | No |
| 34967 | K230010J24Rik | 0.0000 | No |
| 34968 | Kalrn         | 0.0000 | No |
| 34969 | Kank1         | 0.0000 | No |
| 34970 | Kank2         | 0.0000 | No |
| 34971 | Kank3         | 0.0000 | No |
| 34972 | Kank4         | 0.0000 | No |
| 34973 | Kansl1        | 0.0000 | No |
| 34974 | Kansl11       | 0.0000 | No |
| 34975 | Kansl2        | 0.0000 | No |
| 34976 | Kansl2-ps     | 0.0000 | No |
| 34977 | Kansl3        | 0.0000 | No |
| 34978 | Kantr         | 0.0000 | No |
| 34979 | Kap           | 0.0000 | No |
| 34980 | Kars          | 0.0000 | No |
| 34981 | Kars-ps1      | 0.0000 | No |
| 34982 | Kat2a         | 0.0000 | No |
| 34983 | Kat2b         | 0.0000 | No |
| 34984 | Kat5          | 0.0000 | No |
| 34985 | Kat6b         | 0.0000 | No |
| 34986 | Kat6b-ps1     | 0.0000 | No |
| 34987 | Kat7          | 0.0000 | No |
| 34988 | Kat8          | 0.0000 | No |
| 34989 | Katna1        | 0.0000 | No |
| 34990 | Katna11       | 0.0000 | No |
| 34991 | Katna2        | 0.0000 | No |
| 34992 | Katnb1        | 0.0000 | No |
| 34993 | Katnb11       | 0.0000 | No |
| 34994 | Kazald1       | 0.0000 | No |
| 34995 | Kazn          | 0.0000 | No |
| 34996 | Kbtbd11       | 0.0000 | No |
| 34997 | Kbtbd12       | 0.0000 | No |
| 34998 | Kbtbd2        | 0.0000 | No |
| 34999 | Kbtbd3        | 0.0000 | No |
| 35000 | Kbtbd4        | 0.0000 | No |
| 35001 | Kbtbd6        | 0.0000 | No |
| 35002 | Kbtbd7        | 0.0000 | No |
| 35003 | Kbtbd8        | 0.0000 | No |

|       |          |        |    |
|-------|----------|--------|----|
| 35004 | Kbtbd8os | 0.0000 | No |
| 35005 | Kcmf1    | 0.0000 | No |
| 35006 | Kcna1    | 0.0000 | No |
| 35007 | Kcna2    | 0.0000 | No |
| 35008 | Kcna3    | 0.0000 | No |
| 35009 | Kcna4    | 0.0000 | No |
| 35010 | Kcna6    | 0.0000 | No |
| 35011 | Kcna7    | 0.0000 | No |
| 35012 | Kcnab1   | 0.0000 | No |
| 35013 | Kcnab3   | 0.0000 | No |
| 35014 | Kcnab3os | 0.0000 | No |
| 35015 | Kcnb1    | 0.0000 | No |
| 35016 | Kcnb2    | 0.0000 | No |
| 35017 | Kcnc1    | 0.0000 | No |
| 35018 | Kcnc2    | 0.0000 | No |
| 35019 | Kcnc3    | 0.0000 | No |
| 35020 | Kcnc4    | 0.0000 | No |
| 35021 | Kcnd1    | 0.0000 | No |
| 35022 | Kcnd2    | 0.0000 | No |
| 35023 | Kcnd3    | 0.0000 | No |
| 35024 | Kcne1    | 0.0000 | No |
| 35025 | Kcne11   | 0.0000 | No |
| 35026 | Kcne2    | 0.0000 | No |
| 35027 | Kcne3    | 0.0000 | No |
| 35028 | Kcne4    | 0.0000 | No |
| 35029 | Kcnf1    | 0.0000 | No |
| 35030 | Kcng1    | 0.0000 | No |
| 35031 | Kcng2    | 0.0000 | No |
| 35032 | Kcng3    | 0.0000 | No |
| 35033 | Kcng4    | 0.0000 | No |
| 35034 | Kcnh1    | 0.0000 | No |
| 35035 | Kcnh2    | 0.0000 | No |
| 35036 | Kcnh3    | 0.0000 | No |
| 35037 | Kcnh4    | 0.0000 | No |
| 35038 | Kcnh5    | 0.0000 | No |
| 35039 | Kcnh6    | 0.0000 | No |
| 35040 | Kcnh7    | 0.0000 | No |
| 35041 | Kcnh8    | 0.0000 | No |
| 35042 | Kcnip1   | 0.0000 | No |
| 35043 | Kcnip2   | 0.0000 | No |
| 35044 | Kcnip4   | 0.0000 | No |
| 35045 | Kcnj10   | 0.0000 | No |
| 35046 | Kcnj11   | 0.0000 | No |
| 35047 | Kcnj12   | 0.0000 | No |
| 35048 | Kcnj13   | 0.0000 | No |
| 35049 | Kcnj15   | 0.0000 | No |

|       |           |        |    |
|-------|-----------|--------|----|
| 35050 | Kcnj2     | 0.0000 | No |
| 35051 | Kcnj3     | 0.0000 | No |
| 35052 | Kcnj4     | 0.0000 | No |
| 35053 | Kcnj5     | 0.0000 | No |
| 35054 | Kcnj6     | 0.0000 | No |
| 35055 | Kcnj8     | 0.0000 | No |
| 35056 | Kcnj9     | 0.0000 | No |
| 35057 | Kcnk10    | 0.0000 | No |
| 35058 | Kcnk13    | 0.0000 | No |
| 35059 | Kcnk15    | 0.0000 | No |
| 35060 | Kcnk16    | 0.0000 | No |
| 35061 | Kcnk18    | 0.0000 | No |
| 35062 | Kcnk2     | 0.0000 | No |
| 35063 | Kcnk4     | 0.0000 | No |
| 35064 | Kcnk5     | 0.0000 | No |
| 35065 | Kcnk6     | 0.0000 | No |
| 35066 | Kcnk7     | 0.0000 | No |
| 35067 | Kcnk9     | 0.0000 | No |
| 35068 | Kcnmb1    | 0.0000 | No |
| 35069 | Kcnmb2    | 0.0000 | No |
| 35070 | Kcnmb3    | 0.0000 | No |
| 35071 | Kcnmb4    | 0.0000 | No |
| 35072 | Kcnmb4os1 | 0.0000 | No |
| 35073 | Kcnmb4os2 | 0.0000 | No |
| 35074 | Kcnn1     | 0.0000 | No |
| 35075 | Kcnn2     | 0.0000 | No |
| 35076 | Kcnn3     | 0.0000 | No |
| 35077 | Kcnq1     | 0.0000 | No |
| 35078 | Kcnq1ot1  | 0.0000 | No |
| 35079 | Kcnq2     | 0.0000 | No |
| 35080 | Kcnq4     | 0.0000 | No |
| 35081 | Kcnq5     | 0.0000 | No |
| 35082 | Kcnrg     | 0.0000 | No |
| 35083 | Kcns1     | 0.0000 | No |
| 35084 | Kcns2     | 0.0000 | No |
| 35085 | Kcnt1     | 0.0000 | No |
| 35086 | Kcnt2     | 0.0000 | No |
| 35087 | Kenu1     | 0.0000 | No |
| 35088 | Kenv2     | 0.0000 | No |
| 35089 | Kcp       | 0.0000 | No |
| 35090 | Kctd1     | 0.0000 | No |
| 35091 | Kctd10    | 0.0000 | No |
| 35092 | Kctd12    | 0.0000 | No |
| 35093 | Kctd12b   | 0.0000 | No |
| 35094 | Kctd13    | 0.0000 | No |
| 35095 | Kctd14    | 0.0000 | No |

|       |         |        |    |
|-------|---------|--------|----|
| 35096 | Kctd16  | 0.0000 | No |
| 35097 | Kctd17  | 0.0000 | No |
| 35098 | Kctd18  | 0.0000 | No |
| 35099 | Kctd19  | 0.0000 | No |
| 35100 | Kctd2   | 0.0000 | No |
| 35101 | Kctd20  | 0.0000 | No |
| 35102 | Kctd21  | 0.0000 | No |
| 35103 | Kctd3   | 0.0000 | No |
| 35104 | Kctd4   | 0.0000 | No |
| 35105 | Kctd5   | 0.0000 | No |
| 35106 | Kctd6   | 0.0000 | No |
| 35107 | Kctd8   | 0.0000 | No |
| 35108 | Kctd9   | 0.0000 | No |
| 35109 | Kdelc1  | 0.0000 | No |
| 35110 | Kdelc2  | 0.0000 | No |
| 35111 | Kdelr1  | 0.0000 | No |
| 35112 | Kdelr2  | 0.0000 | No |
| 35113 | Kdelr3  | 0.0000 | No |
| 35114 | Kdf1    | 0.0000 | No |
| 35115 | Kdm1a   | 0.0000 | No |
| 35116 | Kdm1b   | 0.0000 | No |
| 35117 | Kdm2b   | 0.0000 | No |
| 35118 | Kdm3a   | 0.0000 | No |
| 35119 | Kdm3b   | 0.0000 | No |
| 35120 | Kdm4a   | 0.0000 | No |
| 35121 | Kdm4b   | 0.0000 | No |
| 35122 | Kdm4c   | 0.0000 | No |
| 35123 | Kdm4d   | 0.0000 | No |
| 35124 | Kdm4dl  | 0.0000 | No |
| 35125 | Kdm5a   | 0.0000 | No |
| 35126 | Kdm5b   | 0.0000 | No |
| 35127 | Kdm5c   | 0.0000 | No |
| 35128 | Kdm5d   | 0.0000 | No |
| 35129 | Kdm6a   | 0.0000 | No |
| 35130 | Kdm6b   | 0.0000 | No |
| 35131 | Kdm6bos | 0.0000 | No |
| 35132 | Kdm7a   | 0.0000 | No |
| 35133 | Kdm8    | 0.0000 | No |
| 35134 | Kdr     | 0.0000 | No |
| 35135 | Kdsr    | 0.0000 | No |
| 35136 | Keap1   | 0.0000 | No |
| 35137 | Keg1    | 0.0000 | No |
| 35138 | Kel     | 0.0000 | No |
| 35139 | Kera    | 0.0000 | No |
| 35140 | Khdc1b  | 0.0000 | No |
| 35141 | Khdc3   | 0.0000 | No |

|       |           |        |    |
|-------|-----------|--------|----|
| 35142 | Khdrbs1   | 0.0000 | No |
| 35143 | Khdrbs2   | 0.0000 | No |
| 35144 | Khdrbs3   | 0.0000 | No |
| 35145 | Khk       | 0.0000 | No |
| 35146 | Khbyn     | 0.0000 | No |
| 35147 | Khsrp     | 0.0000 | No |
| 35148 | KIAA1683  | 0.0000 | No |
| 35149 | Kidins220 | 0.0000 | No |
| 35150 | Kif11     | 0.0000 | No |
| 35151 | Kif12     | 0.0000 | No |
| 35152 | Kif13a    | 0.0000 | No |
| 35153 | Kif13b    | 0.0000 | No |
| 35154 | Kif14     | 0.0000 | No |
| 35155 | Kif15     | 0.0000 | No |
| 35156 | Kif16b    | 0.0000 | No |
| 35157 | Kif16bos  | 0.0000 | No |
| 35158 | Kif17     | 0.0000 | No |
| 35159 | Kif18a    | 0.0000 | No |
| 35160 | Kif18b    | 0.0000 | No |
| 35161 | Kif1a     | 0.0000 | No |
| 35162 | Kif1b     | 0.0000 | No |
| 35163 | Kif1bp    | 0.0000 | No |
| 35164 | Kif1c     | 0.0000 | No |
| 35165 | Kif20a    | 0.0000 | No |
| 35166 | Kif20b    | 0.0000 | No |
| 35167 | Kif21a    | 0.0000 | No |
| 35168 | Kif21b    | 0.0000 | No |
| 35169 | Kif22     | 0.0000 | No |
| 35170 | Kif22-ps  | 0.0000 | No |
| 35171 | Kif23     | 0.0000 | No |
| 35172 | Kif24     | 0.0000 | No |
| 35173 | Kif26a    | 0.0000 | No |
| 35174 | Kif26b    | 0.0000 | No |
| 35175 | Kif27     | 0.0000 | No |
| 35176 | Kif2a     | 0.0000 | No |
| 35177 | Kif2c     | 0.0000 | No |
| 35178 | Kif3a     | 0.0000 | No |
| 35179 | Kif3b     | 0.0000 | No |
| 35180 | Kif3c     | 0.0000 | No |
| 35181 | Kif4      | 0.0000 | No |
| 35182 | Kif4-ps   | 0.0000 | No |
| 35183 | Kif5a     | 0.0000 | No |
| 35184 | Kif5b     | 0.0000 | No |
| 35185 | Kif5c     | 0.0000 | No |
| 35186 | Kif6      | 0.0000 | No |
| 35187 | Kif7      | 0.0000 | No |

|       |           |        |    |
|-------|-----------|--------|----|
| 35188 | Kif9      | 0.0000 | No |
| 35189 | Kifap3    | 0.0000 | No |
| 35190 | Kifc1     | 0.0000 | No |
| 35191 | Kifc2     | 0.0000 | No |
| 35192 | Kifc3     | 0.0000 | No |
| 35193 | Kifc5b    | 0.0000 | No |
| 35194 | Kin       | 0.0000 | No |
| 35195 | Kir3dl1   | 0.0000 | No |
| 35196 | Kir3dl2   | 0.0000 | No |
| 35197 | Kirrel    | 0.0000 | No |
| 35198 | Kirrel2   | 0.0000 | No |
| 35199 | Kirrel3   | 0.0000 | No |
| 35200 | Kirrel3os | 0.0000 | No |
| 35201 | Kis2      | 0.0000 | No |
| 35202 | Kiss1     | 0.0000 | No |
| 35203 | Kiss1r    | 0.0000 | No |
| 35204 | Kit       | 0.0000 | No |
| 35205 | Kiz       | 0.0000 | No |
| 35206 | Kl        | 0.0000 | No |
| 35207 | Klb       | 0.0000 | No |
| 35208 | Klc1      | 0.0000 | No |
| 35209 | Klc2      | 0.0000 | No |
| 35210 | Klc3      | 0.0000 | No |
| 35211 | Klc4      | 0.0000 | No |
| 35212 | Klf1      | 0.0000 | No |
| 35213 | Klf10     | 0.0000 | No |
| 35214 | Klf11     | 0.0000 | No |
| 35215 | Klf13     | 0.0000 | No |
| 35216 | Klf14     | 0.0000 | No |
| 35217 | Klf15     | 0.0000 | No |
| 35218 | Klf16     | 0.0000 | No |
| 35219 | Klf17     | 0.0000 | No |
| 35220 | Klf2      | 0.0000 | No |
| 35221 | Klf3      | 0.0000 | No |
| 35222 | Klf4      | 0.0000 | No |
| 35223 | Klf6      | 0.0000 | No |
| 35224 | Klf7      | 0.0000 | No |
| 35225 | Klf8      | 0.0000 | No |
| 35226 | Klf9      | 0.0000 | No |
| 35227 | Klhdc1    | 0.0000 | No |
| 35228 | Klhdc10   | 0.0000 | No |
| 35229 | Klhdc2    | 0.0000 | No |
| 35230 | Klhdc3    | 0.0000 | No |
| 35231 | Klhdc4    | 0.0000 | No |
| 35232 | Klhdc7a   | 0.0000 | No |
| 35233 | Klhdc7b   | 0.0000 | No |

|       |            |        |    |
|-------|------------|--------|----|
| 35234 | Klhdc8a    | 0.0000 | No |
| 35235 | Klhdc8b    | 0.0000 | No |
| 35236 | Klhdc9     | 0.0000 | No |
| 35237 | Klh11      | 0.0000 | No |
| 35238 | Klh110     | 0.0000 | No |
| 35239 | Klh111     | 0.0000 | No |
| 35240 | Klh112     | 0.0000 | No |
| 35241 | Klh115     | 0.0000 | No |
| 35242 | Klh117     | 0.0000 | No |
| 35243 | Klh118     | 0.0000 | No |
| 35244 | Klh12      | 0.0000 | No |
| 35245 | Klh120     | 0.0000 | No |
| 35246 | Klh121     | 0.0000 | No |
| 35247 | Klh122     | 0.0000 | No |
| 35248 | Klh123     | 0.0000 | No |
| 35249 | Klh124     | 0.0000 | No |
| 35250 | Klh126     | 0.0000 | No |
| 35251 | Klh128     | 0.0000 | No |
| 35252 | Klh129     | 0.0000 | No |
| 35253 | Klh130     | 0.0000 | No |
| 35254 | Klh131     | 0.0000 | No |
| 35255 | Klh132     | 0.0000 | No |
| 35256 | Klh133     | 0.0000 | No |
| 35257 | Klh134     | 0.0000 | No |
| 35258 | Klh135     | 0.0000 | No |
| 35259 | Klh136     | 0.0000 | No |
| 35260 | Klh138     | 0.0000 | No |
| 35261 | Klh14      | 0.0000 | No |
| 35262 | Klh140     | 0.0000 | No |
| 35263 | Klh141     | 0.0000 | No |
| 35264 | Klh142     | 0.0000 | No |
| 35265 | Klh15      | 0.0000 | No |
| 35266 | Klh16      | 0.0000 | No |
| 35267 | Klh17      | 0.0000 | No |
| 35268 | Klh18      | 0.0000 | No |
| 35269 | Klh19      | 0.0000 | No |
| 35270 | Klk1       | 0.0000 | No |
| 35271 | Klk10      | 0.0000 | No |
| 35272 | Klk11      | 0.0000 | No |
| 35273 | Klk12      | 0.0000 | No |
| 35274 | Klk13      | 0.0000 | No |
| 35275 | Klk15      | 0.0000 | No |
| 35276 | Klk1b11    | 0.0000 | No |
| 35277 | Klk1b12-ps | 0.0000 | No |
| 35278 | Klk1b14-ps | 0.0000 | No |
| 35279 | Klk1b16    | 0.0000 | No |

|       |            |        |    |
|-------|------------|--------|----|
| 35280 | Klk1b18-ps | 0.0000 | No |
| 35281 | Klk1b19-ps | 0.0000 | No |
| 35282 | Klk1b21    | 0.0000 | No |
| 35283 | Klk1b24    | 0.0000 | No |
| 35284 | Klk1b26    | 0.0000 | No |
| 35285 | Klk1b27    | 0.0000 | No |
| 35286 | Klk1b28-ps | 0.0000 | No |
| 35287 | Klk1b3     | 0.0000 | No |
| 35288 | Klk1b4     | 0.0000 | No |
| 35289 | Klk1b5     | 0.0000 | No |
| 35290 | Klk1b7-ps  | 0.0000 | No |
| 35291 | Klk1b9     | 0.0000 | No |
| 35292 | Klk2-ps    | 0.0000 | No |
| 35293 | Klk4       | 0.0000 | No |
| 35294 | Klk5       | 0.0000 | No |
| 35295 | Klk7       | 0.0000 | No |
| 35296 | Klk8       | 0.0000 | No |
| 35297 | Klk9       | 0.0000 | No |
| 35298 | Klra11-ps  | 0.0000 | No |
| 35299 | Klra14-ps  | 0.0000 | No |
| 35300 | Klra17     | 0.0000 | No |
| 35301 | Klra3      | 0.0000 | No |
| 35302 | Klra4      | 0.0000 | No |
| 35303 | Klra5      | 0.0000 | No |
| 35304 | Klra6      | 0.0000 | No |
| 35305 | Klra9      | 0.0000 | No |
| 35306 | Klrb1c     | 0.0000 | No |
| 35307 | Klrb1-ps1  | 0.0000 | No |
| 35308 | Klrc2      | 0.0000 | No |
| 35309 | Klrd1      | 0.0000 | No |
| 35310 | Klre1      | 0.0000 | No |
| 35311 | Klrg2      | 0.0000 | No |
| 35312 | Klrk1      | 0.0000 | No |
| 35313 | Kmo        | 0.0000 | No |
| 35314 | Kmt2a      | 0.0000 | No |
| 35315 | Kmt2b      | 0.0000 | No |
| 35316 | Kmt2c      | 0.0000 | No |
| 35317 | Kmt2d      | 0.0000 | No |
| 35318 | Kmt2e      | 0.0000 | No |
| 35319 | Kmt5a      | 0.0000 | No |
| 35320 | Kmt5b      | 0.0000 | No |
| 35321 | Kmt5c      | 0.0000 | No |
| 35322 | Kncn       | 0.0000 | No |
| 35323 | Kndc1      | 0.0000 | No |
| 35324 | Kng1       | 0.0000 | No |
| 35325 | Kng2       | 0.0000 | No |



|       |          |        |    |
|-------|----------|--------|----|
| 35326 | Kn11     | 0.0000 | No |
| 35327 | Knop1    | 0.0000 | No |
| 35328 | Knstrn   | 0.0000 | No |
| 35329 | Kntc1    | 0.0000 | No |
| 35330 | Kpna1    | 0.0000 | No |
| 35331 | Kpna2    | 0.0000 | No |
| 35332 | Kpna2-ps | 0.0000 | No |
| 35333 | Kpna3    | 0.0000 | No |
| 35334 | Kpna4    | 0.0000 | No |
| 35335 | Kpna6    | 0.0000 | No |
| 35336 | Kpna7    | 0.0000 | No |
| 35337 | Kpnb1    | 0.0000 | No |
| 35338 | Kprp     | 0.0000 | No |
| 35339 | Kptn     | 0.0000 | No |
| 35340 | Kras     | 0.0000 | No |
| 35341 | Krbal    | 0.0000 | No |
| 35342 | Krcc1    | 0.0000 | No |
| 35343 | Kremen1  | 0.0000 | No |
| 35344 | Kremen2  | 0.0000 | No |
| 35345 | Kri1     | 0.0000 | No |
| 35346 | Krit1    | 0.0000 | No |
| 35347 | Krr1     | 0.0000 | No |
| 35348 | Krt1     | 0.0000 | No |
| 35349 | Krt10    | 0.0000 | No |
| 35350 | Krt12    | 0.0000 | No |
| 35351 | Krt13    | 0.0000 | No |
| 35352 | Krt14    | 0.0000 | No |
| 35353 | Krt17    | 0.0000 | No |
| 35354 | Krt18    | 0.0000 | No |
| 35355 | Krt2     | 0.0000 | No |
| 35356 | Krt20    | 0.0000 | No |
| 35357 | Krt222   | 0.0000 | No |
| 35358 | Krt23    | 0.0000 | No |
| 35359 | Krt25    | 0.0000 | No |
| 35360 | Krt27    | 0.0000 | No |
| 35361 | Krt31    | 0.0000 | No |
| 35362 | Krt32    | 0.0000 | No |
| 35363 | Krt33a   | 0.0000 | No |
| 35364 | Krt34    | 0.0000 | No |
| 35365 | Krt35    | 0.0000 | No |
| 35366 | Krt36    | 0.0000 | No |
| 35367 | Krt40    | 0.0000 | No |
| 35368 | Krt42    | 0.0000 | No |
| 35369 | Krt5     | 0.0000 | No |
| 35370 | Krt6a    | 0.0000 | No |
| 35371 | Krt6b    | 0.0000 | No |

|       |            |        |    |
|-------|------------|--------|----|
| 35372 | Krt7       | 0.0000 | No |
| 35373 | Krt71      | 0.0000 | No |
| 35374 | Krt72      | 0.0000 | No |
| 35375 | Krt74      | 0.0000 | No |
| 35376 | Krt76      | 0.0000 | No |
| 35377 | Krt77      | 0.0000 | No |
| 35378 | Krt78      | 0.0000 | No |
| 35379 | Krt79      | 0.0000 | No |
| 35380 | Krt81      | 0.0000 | No |
| 35381 | Krt82      | 0.0000 | No |
| 35382 | Krt83      | 0.0000 | No |
| 35383 | Krt84      | 0.0000 | No |
| 35384 | Krt86      | 0.0000 | No |
| 35385 | Krt87      | 0.0000 | No |
| 35386 | Krt88      | 0.0000 | No |
| 35387 | Krt8-ps    | 0.0000 | No |
| 35388 | Krt9       | 0.0000 | No |
| 35389 | Krtap10-4  | 0.0000 | No |
| 35390 | Krtap11-1  | 0.0000 | No |
| 35391 | Krtap12-1  | 0.0000 | No |
| 35392 | Krtap13    | 0.0000 | No |
| 35393 | Krtap1-3   | 0.0000 | No |
| 35394 | Krtap13-1  | 0.0000 | No |
| 35395 | Krtap14    | 0.0000 | No |
| 35396 | Krtap15    | 0.0000 | No |
| 35397 | Krtap1-5   | 0.0000 | No |
| 35398 | Krtap16-1  | 0.0000 | No |
| 35399 | Krtap16-3  | 0.0000 | No |
| 35400 | Krtap17-1  | 0.0000 | No |
| 35401 | Krtap19-2  | 0.0000 | No |
| 35402 | Krtap19-3  | 0.0000 | No |
| 35403 | Krtap19-4  | 0.0000 | No |
| 35404 | Krtap19-5  | 0.0000 | No |
| 35405 | Krtap19-9a | 0.0000 | No |
| 35406 | Krtap19-9b | 0.0000 | No |
| 35407 | Krtap20-2  | 0.0000 | No |
| 35408 | Krtap21-1  | 0.0000 | No |
| 35409 | Krtap22-2  | 0.0000 | No |
| 35410 | Krtap2-4   | 0.0000 | No |
| 35411 | Krtap24-1  | 0.0000 | No |
| 35412 | Krtap26-1  | 0.0000 | No |
| 35413 | Krtap27-1  | 0.0000 | No |
| 35414 | Krtap28-10 | 0.0000 | No |
| 35415 | Krtap28-13 | 0.0000 | No |
| 35416 | Krtap31-1  | 0.0000 | No |
| 35417 | Krtap31-2  | 0.0000 | No |

|       |           |        |    |
|-------|-----------|--------|----|
| 35418 | Krtap3-3  | 0.0000 | No |
| 35419 | Krtap4-1  | 0.0000 | No |
| 35420 | Krtap4-13 | 0.0000 | No |
| 35421 | Krtap4-16 | 0.0000 | No |
| 35422 | Krtap4-6  | 0.0000 | No |
| 35423 | Krtap4-7  | 0.0000 | No |
| 35424 | Krtap4-8  | 0.0000 | No |
| 35425 | Krtap4-9  | 0.0000 | No |
| 35426 | Krtap5-1  | 0.0000 | No |
| 35427 | Krtap5-2  | 0.0000 | No |
| 35428 | Krtap5-3  | 0.0000 | No |
| 35429 | Krtap5-4  | 0.0000 | No |
| 35430 | Krtap5-5  | 0.0000 | No |
| 35431 | Krtap6-1  | 0.0000 | No |
| 35432 | Krtap6-2  | 0.0000 | No |
| 35433 | Krtap6-3  | 0.0000 | No |
| 35434 | Krtap6-5  | 0.0000 | No |
| 35435 | Krtap7-1  | 0.0000 | No |
| 35436 | Krtap8-1  | 0.0000 | No |
| 35437 | Krtap9-3  | 0.0000 | No |
| 35438 | Krtap9-5  | 0.0000 | No |
| 35439 | Krtcap2   | 0.0000 | No |
| 35440 | Krtcap3   | 0.0000 | No |
| 35441 | Krtdap    | 0.0000 | No |
| 35442 | Ksr1      | 0.0000 | No |
| 35443 | Ksr2      | 0.0000 | No |
| 35444 | Kti12     | 0.0000 | No |
| 35445 | Ktn1      | 0.0000 | No |
| 35446 | Kxd1      | 0.0000 | No |
| 35447 | Ky        | 0.0000 | No |
| 35448 | Kyat1     | 0.0000 | No |
| 35449 | Kyat3     | 0.0000 | No |
| 35450 | L1cam     | 0.0000 | No |
| 35451 | L2hgdh    | 0.0000 | No |
| 35452 | L3hypdh   | 0.0000 | No |
| 35453 | L3mbtl1   | 0.0000 | No |
| 35454 | L3mbtl2   | 0.0000 | No |
| 35455 | L3mbtl3   | 0.0000 | No |
| 35456 | L3mbtl4   | 0.0000 | No |
| 35457 | Lacc1     | 0.0000 | No |
| 35458 | Lace1     | 0.0000 | No |
| 35459 | Lactb     | 0.0000 | No |
| 35460 | Lactb2    | 0.0000 | No |
| 35461 | Lactb11   | 0.0000 | No |
| 35462 | Lad1      | 0.0000 | No |
| 35463 | Lag3      | 0.0000 | No |

|       |           |        |    |
|-------|-----------|--------|----|
| 35464 | Lage3     | 0.0000 | No |
| 35465 | Lair1     | 0.0000 | No |
| 35466 | Lama1     | 0.0000 | No |
| 35467 | Lama2     | 0.0000 | No |
| 35468 | Lama3     | 0.0000 | No |
| 35469 | Lama4     | 0.0000 | No |
| 35470 | Lama5     | 0.0000 | No |
| 35471 | Lamb1     | 0.0000 | No |
| 35472 | Lamb2     | 0.0000 | No |
| 35473 | Lamb3     | 0.0000 | No |
| 35474 | Lamc1     | 0.0000 | No |
| 35475 | Lamc2     | 0.0000 | No |
| 35476 | Lamc3     | 0.0000 | No |
| 35477 | Lamp1     | 0.0000 | No |
| 35478 | Lamp2     | 0.0000 | No |
| 35479 | Lamp3     | 0.0000 | No |
| 35480 | Lamp5     | 0.0000 | No |
| 35481 | Lamr1-ps1 | 0.0000 | No |
| 35482 | Lamtor1   | 0.0000 | No |
| 35483 | Lamtor2   | 0.0000 | No |
| 35484 | Lamtor4   | 0.0000 | No |
| 35485 | Lamtor5   | 0.0000 | No |
| 35486 | Lanc11    | 0.0000 | No |
| 35487 | Lanc12    | 0.0000 | No |
| 35488 | Lanc13    | 0.0000 | No |
| 35489 | Lap3      | 0.0000 | No |
| 35490 | Laptm4a   | 0.0000 | No |
| 35491 | Laptm4b   | 0.0000 | No |
| 35492 | Laptm5    | 0.0000 | No |
| 35493 | Large1    | 0.0000 | No |
| 35494 | Large2    | 0.0000 | No |
| 35495 | Larp1     | 0.0000 | No |
| 35496 | Larp1b    | 0.0000 | No |
| 35497 | Larp4     | 0.0000 | No |
| 35498 | Larp4b    | 0.0000 | No |
| 35499 | Larp7     | 0.0000 | No |
| 35500 | Lars      | 0.0000 | No |
| 35501 | Lars2     | 0.0000 | No |
| 35502 | Las11     | 0.0000 | No |
| 35503 | Lat2      | 0.0000 | No |
| 35504 | Lats1     | 0.0000 | No |
| 35505 | Lax1      | 0.0000 | No |
| 35506 | Layn      | 0.0000 | No |
| 35507 | Lbh       | 0.0000 | No |
| 35508 | Lbhd1     | 0.0000 | No |
| 35509 | Lbp       | 0.0000 | No |

|       |         |        |    |
|-------|---------|--------|----|
| 35510 | Lbr     | 0.0000 | No |
| 35511 | Lbx1    | 0.0000 | No |
| 35512 | Lbx2    | 0.0000 | No |
| 35513 | Lca5    | 0.0000 | No |
| 35514 | Lca5l   | 0.0000 | No |
| 35515 | Lcat    | 0.0000 | No |
| 35516 | Lce1a1  | 0.0000 | No |
| 35517 | Lce1a2  | 0.0000 | No |
| 35518 | Lce1c   | 0.0000 | No |
| 35519 | Lce1d   | 0.0000 | No |
| 35520 | Lce1e   | 0.0000 | No |
| 35521 | Lce1f   | 0.0000 | No |
| 35522 | Lce1g   | 0.0000 | No |
| 35523 | Lce1h   | 0.0000 | No |
| 35524 | Lce1i   | 0.0000 | No |
| 35525 | Lce1j   | 0.0000 | No |
| 35526 | Lce1k   | 0.0000 | No |
| 35527 | Lce1l   | 0.0000 | No |
| 35528 | Lce1m   | 0.0000 | No |
| 35529 | Lce3a   | 0.0000 | No |
| 35530 | Lce3b   | 0.0000 | No |
| 35531 | Lce3c   | 0.0000 | No |
| 35532 | Lce3e   | 0.0000 | No |
| 35533 | Lce6a   | 0.0000 | No |
| 35534 | Lelat1  | 0.0000 | No |
| 35535 | Lcmt1   | 0.0000 | No |
| 35536 | Lcmt2   | 0.0000 | No |
| 35537 | Lcn10   | 0.0000 | No |
| 35538 | Lcn12   | 0.0000 | No |
| 35539 | Lcn2    | 0.0000 | No |
| 35540 | Lcn3    | 0.0000 | No |
| 35541 | Lcn4    | 0.0000 | No |
| 35542 | Lcn5    | 0.0000 | No |
| 35543 | Lcn6    | 0.0000 | No |
| 35544 | Lcn8    | 0.0000 | No |
| 35545 | Lcn9    | 0.0000 | No |
| 35546 | Lcor    | 0.0000 | No |
| 35547 | Lcorl   | 0.0000 | No |
| 35548 | Lcp1    | 0.0000 | No |
| 35549 | Lct     | 0.0000 | No |
| 35550 | Lctl    | 0.0000 | No |
| 35551 | Ldah    | 0.0000 | No |
| 35552 | Ldb1    | 0.0000 | No |
| 35553 | Ldb2    | 0.0000 | No |
| 35554 | Ldb3    | 0.0000 | No |
| 35555 | Ldhal6b | 0.0000 | No |

|       |            |        |    |
|-------|------------|--------|----|
| 35556 | Ldha-ps    | 0.0000 | No |
| 35557 | Ldha-ps2   | 0.0000 | No |
| 35558 | Ldhb       | 0.0000 | No |
| 35559 | Ldhc       | 0.0000 | No |
| 35560 | Ldhd       | 0.0000 | No |
| 35561 | Ldlr       | 0.0000 | No |
| 35562 | Ldlrad1    | 0.0000 | No |
| 35563 | Ldlrad2    | 0.0000 | No |
| 35564 | Ldlrad3    | 0.0000 | No |
| 35565 | Ldlrad4    | 0.0000 | No |
| 35566 | Ldlrap1    | 0.0000 | No |
| 35567 | Ldoc1      | 0.0000 | No |
| 35568 | Ldoc11     | 0.0000 | No |
| 35569 | Leap2      | 0.0000 | No |
| 35570 | Lect1      | 0.0000 | No |
| 35571 | Lef1       | 0.0000 | No |
| 35572 | Lefty1     | 0.0000 | No |
| 35573 | Lefty2     | 0.0000 | No |
| 35574 | Lekr1      | 0.0000 | No |
| 35575 | Lelp1      | 0.0000 | No |
| 35576 | Lemd1      | 0.0000 | No |
| 35577 | Lemd2      | 0.0000 | No |
| 35578 | Lemd3      | 0.0000 | No |
| 35579 | Lenep      | 0.0000 | No |
| 35580 | Leng1      | 0.0000 | No |
| 35581 | Leng8      | 0.0000 | No |
| 35582 | Leo1       | 0.0000 | No |
| 35583 | Lep        | 0.0000 | No |
| 35584 | Lepr       | 0.0000 | No |
| 35585 | Leprot     | 0.0000 | No |
| 35586 | Letm1      | 0.0000 | No |
| 35587 | Letm2      | 0.0000 | No |
| 35588 | Letmd1     | 0.0000 | No |
| 35589 | Lexm       | 0.0000 | No |
| 35590 | Lfng       | 0.0000 | No |
| 35591 | Lgals1     | 0.0000 | No |
| 35592 | Lgals12    | 0.0000 | No |
| 35593 | Lgals1-ps1 | 0.0000 | No |
| 35594 | Lgals1-ps2 | 0.0000 | No |
| 35595 | Lgals3     | 0.0000 | No |
| 35596 | Lgals3bp   | 0.0000 | No |
| 35597 | Lgals4     | 0.0000 | No |
| 35598 | Lgals7     | 0.0000 | No |
| 35599 | Lgals9     | 0.0000 | No |
| 35600 | Lgalsl     | 0.0000 | No |
| 35601 | Lgi1       | 0.0000 | No |

|       |         |        |    |
|-------|---------|--------|----|
| 35602 | Lgi2    | 0.0000 | No |
| 35603 | Lgi3    | 0.0000 | No |
| 35604 | Lgi4    | 0.0000 | No |
| 35605 | Lgmn    | 0.0000 | No |
| 35606 | Lgr4    | 0.0000 | No |
| 35607 | Lgr5    | 0.0000 | No |
| 35608 | Lgr6    | 0.0000 | No |
| 35609 | Lgsn    | 0.0000 | No |
| 35610 | Lhb     | 0.0000 | No |
| 35611 | Lhcgr   | 0.0000 | No |
| 35612 | Lhfp    | 0.0000 | No |
| 35613 | Lhfp1   | 0.0000 | No |
| 35614 | Lhfp2   | 0.0000 | No |
| 35615 | Lhfp3   | 0.0000 | No |
| 35616 | Lhfp4   | 0.0000 | No |
| 35617 | Lhpp    | 0.0000 | No |
| 35618 | Lhx1    | 0.0000 | No |
| 35619 | Lhx1os  | 0.0000 | No |
| 35620 | Lhx2    | 0.0000 | No |
| 35621 | Lhx3    | 0.0000 | No |
| 35622 | Lhx4    | 0.0000 | No |
| 35623 | Lhx5    | 0.0000 | No |
| 35624 | Lhx6    | 0.0000 | No |
| 35625 | Lhx8    | 0.0000 | No |
| 35626 | Lhx9    | 0.0000 | No |
| 35627 | Lias    | 0.0000 | No |
| 35628 | Lif     | 0.0000 | No |
| 35629 | Lifr    | 0.0000 | No |
| 35630 | Lig1    | 0.0000 | No |
| 35631 | Lig3    | 0.0000 | No |
| 35632 | Lig4    | 0.0000 | No |
| 35633 | Lilrb4a | 0.0000 | No |
| 35634 | Lim2    | 0.0000 | No |
| 35635 | Lima1   | 0.0000 | No |
| 35636 | Limch1  | 0.0000 | No |
| 35637 | Limd1   | 0.0000 | No |
| 35638 | Limd2   | 0.0000 | No |
| 35639 | Lime1   | 0.0000 | No |
| 35640 | Limk2   | 0.0000 | No |
| 35641 | Lims1   | 0.0000 | No |
| 35642 | Lims2   | 0.0000 | No |
| 35643 | Lin28a  | 0.0000 | No |
| 35644 | Lin28b  | 0.0000 | No |
| 35645 | Lin37   | 0.0000 | No |
| 35646 | Lin52   | 0.0000 | No |
| 35647 | Lin54   | 0.0000 | No |

|       |          |        |    |
|-------|----------|--------|----|
| 35648 | Lin7a    | 0.0000 | No |
| 35649 | Lin7b    | 0.0000 | No |
| 35650 | Lin7c    | 0.0000 | No |
| 35651 | Lingo2   | 0.0000 | No |
| 35652 | Lingo3   | 0.0000 | No |
| 35653 | Lins1    | 0.0000 | No |
| 35654 | Lipa     | 0.0000 | No |
| 35655 | Lipc     | 0.0000 | No |
| 35656 | Lipe     | 0.0000 | No |
| 35657 | Lipf     | 0.0000 | No |
| 35658 | Lipg     | 0.0000 | No |
| 35659 | Liph     | 0.0000 | No |
| 35660 | Lipn     | 0.0000 | No |
| 35661 | Lipo1    | 0.0000 | No |
| 35662 | Lipo2    | 0.0000 | No |
| 35663 | Lipo3    | 0.0000 | No |
| 35664 | Lipo4    | 0.0000 | No |
| 35665 | Lipo5    | 0.0000 | No |
| 35666 | Lipt1    | 0.0000 | No |
| 35667 | Lipt2    | 0.0000 | No |
| 35668 | Litaf    | 0.0000 | No |
| 35669 | Lix1     | 0.0000 | No |
| 35670 | Lix11    | 0.0000 | No |
| 35671 | Lkaear1  | 0.0000 | No |
| 35672 | Llg11    | 0.0000 | No |
| 35673 | Llph     | 0.0000 | No |
| 35674 | Llph-ps2 | 0.0000 | No |
| 35675 | Lman1    | 0.0000 | No |
| 35676 | Lman2    | 0.0000 | No |
| 35677 | Lman21   | 0.0000 | No |
| 35678 | Lmbr1    | 0.0000 | No |
| 35679 | Lmbr11   | 0.0000 | No |
| 35680 | Lmbrd1   | 0.0000 | No |
| 35681 | Lmbrd2   | 0.0000 | No |
| 35682 | Lmcd1    | 0.0000 | No |
| 35683 | Lmf1     | 0.0000 | No |
| 35684 | Lmf2     | 0.0000 | No |
| 35685 | Lmln     | 0.0000 | No |
| 35686 | Lmna     | 0.0000 | No |
| 35687 | Lmnb1    | 0.0000 | No |
| 35688 | Lmnb2    | 0.0000 | No |
| 35689 | Lmntd1   | 0.0000 | No |
| 35690 | Lmntd2   | 0.0000 | No |
| 35691 | Lmo1     | 0.0000 | No |
| 35692 | Lmo3     | 0.0000 | No |
| 35693 | Lmo4     | 0.0000 | No |



|       |         |        |    |
|-------|---------|--------|----|
| 35694 | Lmo7    | 0.0000 | No |
| 35695 | Lmod2   | 0.0000 | No |
| 35696 | Lmod3   | 0.0000 | No |
| 35697 | Lmtk3   | 0.0000 | No |
| 35698 | Lmx1a   | 0.0000 | No |
| 35699 | Lmx1b   | 0.0000 | No |
| 35700 | Lncenc1 | 0.0000 | No |
| 35701 | Lncpint | 0.0000 | No |
| 35702 | Lnp1    | 0.0000 | No |
| 35703 | Lnpep   | 0.0000 | No |
| 35704 | Lnpk1   | 0.0000 | No |
| 35705 | Lnx1    | 0.0000 | No |
| 35706 | Lnx2    | 0.0000 | No |
| 35707 | Lockd   | 0.0000 | No |
| 35708 | Lonp1   | 0.0000 | No |
| 35709 | Lonp2   | 0.0000 | No |
| 35710 | Lonrf1  | 0.0000 | No |
| 35711 | Lonrf2  | 0.0000 | No |
| 35712 | Lonrf3  | 0.0000 | No |
| 35713 | Loxhd1  | 0.0000 | No |
| 35714 | Loxl1   | 0.0000 | No |
| 35715 | Loxl2   | 0.0000 | No |
| 35716 | Loxl3   | 0.0000 | No |
| 35717 | Loxl4   | 0.0000 | No |
| 35718 | Lpar1   | 0.0000 | No |
| 35719 | Lpar2   | 0.0000 | No |
| 35720 | Lpar3   | 0.0000 | No |
| 35721 | Lpar4   | 0.0000 | No |
| 35722 | Lpar5   | 0.0000 | No |
| 35723 | Lpcat2b | 0.0000 | No |
| 35724 | Lpcat3  | 0.0000 | No |
| 35725 | Lpcat4  | 0.0000 | No |
| 35726 | Lpgat1  | 0.0000 | No |
| 35727 | Lpin1   | 0.0000 | No |
| 35728 | Lpin2   | 0.0000 | No |
| 35729 | Lpin3   | 0.0000 | No |
| 35730 | Lpo     | 0.0000 | No |
| 35731 | Lpp     | 0.0000 | No |
| 35732 | Lppos   | 0.0000 | No |
| 35733 | Lpxn    | 0.0000 | No |
| 35734 | Lrba    | 0.0000 | No |
| 35735 | Lrch1   | 0.0000 | No |
| 35736 | Lrch2   | 0.0000 | No |
| 35737 | Lrch3   | 0.0000 | No |
| 35738 | Lrch4   | 0.0000 | No |
| 35739 | Lrcol1  | 0.0000 | No |

|       |         |        |    |
|-------|---------|--------|----|
| 35740 | Lrfn1   | 0.0000 | No |
| 35741 | Lrfn3   | 0.0000 | No |
| 35742 | Lrfn5   | 0.0000 | No |
| 35743 | Lrg1    | 0.0000 | No |
| 35744 | Lrguk   | 0.0000 | No |
| 35745 | Lrif1   | 0.0000 | No |
| 35746 | Lrig2   | 0.0000 | No |
| 35747 | Lrit1   | 0.0000 | No |
| 35748 | Lrit2   | 0.0000 | No |
| 35749 | Lrit3   | 0.0000 | No |
| 35750 | Lrmp    | 0.0000 | No |
| 35751 | Lrp1    | 0.0000 | No |
| 35752 | Lrp10   | 0.0000 | No |
| 35753 | Lrp11   | 0.0000 | No |
| 35754 | Lrp12   | 0.0000 | No |
| 35755 | Lrp1b   | 0.0000 | No |
| 35756 | Lrp2    | 0.0000 | No |
| 35757 | Lrp2bp  | 0.0000 | No |
| 35758 | Lrp3    | 0.0000 | No |
| 35759 | Lrp4    | 0.0000 | No |
| 35760 | Lrp5    | 0.0000 | No |
| 35761 | Lrp6    | 0.0000 | No |
| 35762 | Lrp8os1 | 0.0000 | No |
| 35763 | Lrp8os2 | 0.0000 | No |
| 35764 | Lrp8os3 | 0.0000 | No |
| 35765 | Lrpap1  | 0.0000 | No |
| 35766 | Lrpprc  | 0.0000 | No |
| 35767 | Lrr1    | 0.0000 | No |
| 35768 | Lrrc1   | 0.0000 | No |
| 35769 | Lrrc10  | 0.0000 | No |
| 35770 | Lrrc10b | 0.0000 | No |
| 35771 | Lrrc14  | 0.0000 | No |
| 35772 | Lrrc14b | 0.0000 | No |
| 35773 | Lrrc15  | 0.0000 | No |
| 35774 | Lrrc19  | 0.0000 | No |
| 35775 | Lrrc2   | 0.0000 | No |
| 35776 | Lrrc20  | 0.0000 | No |
| 35777 | Lrrc23  | 0.0000 | No |
| 35778 | Lrrc24  | 0.0000 | No |
| 35779 | Lrrc25  | 0.0000 | No |
| 35780 | Lrrc26  | 0.0000 | No |
| 35781 | Lrrc27  | 0.0000 | No |
| 35782 | Lrrc28  | 0.0000 | No |
| 35783 | Lrrc29  | 0.0000 | No |
| 35784 | Lrrc3   | 0.0000 | No |
| 35785 | Lrrc31  | 0.0000 | No |

|       |            |        |    |
|-------|------------|--------|----|
| 35786 | Lrrc32     | 0.0000 | No |
| 35787 | Lrrc34     | 0.0000 | No |
| 35788 | Lrrc36     | 0.0000 | No |
| 35789 | Lrrc37a    | 0.0000 | No |
| 35790 | Lrrc38     | 0.0000 | No |
| 35791 | Lrrc39     | 0.0000 | No |
| 35792 | Lrrc3b     | 0.0000 | No |
| 35793 | Lrrc3c     | 0.0000 | No |
| 35794 | Lrrc4      | 0.0000 | No |
| 35795 | Lrrc40     | 0.0000 | No |
| 35796 | Lrrc41     | 0.0000 | No |
| 35797 | Lrrc42     | 0.0000 | No |
| 35798 | Lrrc43     | 0.0000 | No |
| 35799 | Lrrc45     | 0.0000 | No |
| 35800 | Lrrc47     | 0.0000 | No |
| 35801 | Lrrc48     | 0.0000 | No |
| 35802 | Lrrc49     | 0.0000 | No |
| 35803 | Lrrc4b     | 0.0000 | No |
| 35804 | Lrrc4c     | 0.0000 | No |
| 35805 | Lrrc51     | 0.0000 | No |
| 35806 | Lrrc52     | 0.0000 | No |
| 35807 | Lrrc55     | 0.0000 | No |
| 35808 | Lrrc56     | 0.0000 | No |
| 35809 | Lrrc57     | 0.0000 | No |
| 35810 | Lrrc58     | 0.0000 | No |
| 35811 | Lrrc59     | 0.0000 | No |
| 35812 | Lrrc6      | 0.0000 | No |
| 35813 | Lrrc61     | 0.0000 | No |
| 35814 | Lrrc63     | 0.0000 | No |
| 35815 | Lrrc66     | 0.0000 | No |
| 35816 | Lrrc69     | 0.0000 | No |
| 35817 | Lrrc7      | 0.0000 | No |
| 35818 | Lrrc71     | 0.0000 | No |
| 35819 | Lrrc73     | 0.0000 | No |
| 35820 | Lrrc74a    | 0.0000 | No |
| 35821 | Lrrc75a    | 0.0000 | No |
| 35822 | Lrrc75aos2 | 0.0000 | No |
| 35823 | Lrrc8a     | 0.0000 | No |
| 35824 | Lrrc8b     | 0.0000 | No |
| 35825 | Lrrc8c     | 0.0000 | No |
| 35826 | Lrrc8d     | 0.0000 | No |
| 35827 | Lrrc8dos   | 0.0000 | No |
| 35828 | Lrrc8e     | 0.0000 | No |
| 35829 | Lrrcc1     | 0.0000 | No |
| 35830 | Lrrd1      | 0.0000 | No |
| 35831 | Lrrfip1    | 0.0000 | No |

|       |         |        |    |
|-------|---------|--------|----|
| 35832 | Lrriq1  | 0.0000 | No |
| 35833 | Lrriq3  | 0.0000 | No |
| 35834 | Lrriq4  | 0.0000 | No |
| 35835 | Lrrk1   | 0.0000 | No |
| 35836 | Lrrk2   | 0.0000 | No |
| 35837 | Lrrn1   | 0.0000 | No |
| 35838 | Lrrn2   | 0.0000 | No |
| 35839 | Lrrn4cl | 0.0000 | No |
| 35840 | Lrrtm1  | 0.0000 | No |
| 35841 | Lrrtm2  | 0.0000 | No |
| 35842 | Lrrtm3  | 0.0000 | No |
| 35843 | Lrrtm4  | 0.0000 | No |
| 35844 | Lrsam1  | 0.0000 | No |
| 35845 | Lrtm1   | 0.0000 | No |
| 35846 | Lrtm2   | 0.0000 | No |
| 35847 | Lrwd1   | 0.0000 | No |
| 35848 | Lsamp   | 0.0000 | No |
| 35849 | Lsg1    | 0.0000 | No |
| 35850 | Lsm1    | 0.0000 | No |
| 35851 | Lsm10   | 0.0000 | No |
| 35852 | Lsm11   | 0.0000 | No |
| 35853 | Lsm12   | 0.0000 | No |
| 35854 | Lsm14a  | 0.0000 | No |
| 35855 | Lsm14b  | 0.0000 | No |
| 35856 | Lsm2    | 0.0000 | No |
| 35857 | Lsm3    | 0.0000 | No |
| 35858 | Lsm4    | 0.0000 | No |
| 35859 | Lsm5    | 0.0000 | No |
| 35860 | Lsm7    | 0.0000 | No |
| 35861 | Lsm8    | 0.0000 | No |
| 35862 | Lsmem1  | 0.0000 | No |
| 35863 | Lsmem2  | 0.0000 | No |
| 35864 | Lsp1    | 0.0000 | No |
| 35865 | Lsr     | 0.0000 | No |
| 35866 | Lss     | 0.0000 | No |
| 35867 | Lst1    | 0.0000 | No |
| 35868 | Lta     | 0.0000 | No |
| 35869 | Lta4h   | 0.0000 | No |
| 35870 | Ltb     | 0.0000 | No |
| 35871 | Ltb4r1  | 0.0000 | No |
| 35872 | Ltb4r2  | 0.0000 | No |
| 35873 | Ltbp1   | 0.0000 | No |
| 35874 | Ltbp2   | 0.0000 | No |
| 35875 | Ltbp3   | 0.0000 | No |
| 35876 | Ltbp4   | 0.0000 | No |
| 35877 | Ltc4s   | 0.0000 | No |

|       |         |        |    |
|-------|---------|--------|----|
| 35878 | Ltf     | 0.0000 | No |
| 35879 | Ltk     | 0.0000 | No |
| 35880 | Ltn1    | 0.0000 | No |
| 35881 | Ltv1    | 0.0000 | No |
| 35882 | Luc7l   | 0.0000 | No |
| 35883 | Luc7l2  | 0.0000 | No |
| 35884 | Luc7l3  | 0.0000 | No |
| 35885 | Lurap1  | 0.0000 | No |
| 35886 | Luzp2   | 0.0000 | No |
| 35887 | Luzp4   | 0.0000 | No |
| 35888 | Lvrn    | 0.0000 | No |
| 35889 | Lxn     | 0.0000 | No |
| 35890 | Ly6a    | 0.0000 | No |
| 35891 | Ly6c2   | 0.0000 | No |
| 35892 | Ly6e    | 0.0000 | No |
| 35893 | Ly6g    | 0.0000 | No |
| 35894 | Ly6g6c  | 0.0000 | No |
| 35895 | Ly6g6e  | 0.0000 | No |
| 35896 | Ly6g6f  | 0.0000 | No |
| 35897 | Ly6h    | 0.0000 | No |
| 35898 | Ly6i    | 0.0000 | No |
| 35899 | Ly6l    | 0.0000 | No |
| 35900 | Ly75    | 0.0000 | No |
| 35901 | Ly9     | 0.0000 | No |
| 35902 | Ly96    | 0.0000 | No |
| 35903 | Lyar    | 0.0000 | No |
| 35904 | Lyg1    | 0.0000 | No |
| 35905 | Lyg2    | 0.0000 | No |
| 35906 | Lypd1   | 0.0000 | No |
| 35907 | Lypd2   | 0.0000 | No |
| 35908 | Lypd4   | 0.0000 | No |
| 35909 | Lypd5   | 0.0000 | No |
| 35910 | Lypd6   | 0.0000 | No |
| 35911 | Lypla1  | 0.0000 | No |
| 35912 | Lypla2  | 0.0000 | No |
| 35913 | Lyplal1 | 0.0000 | No |
| 35914 | Lym1    | 0.0000 | No |
| 35915 | Lym2    | 0.0000 | No |
| 35916 | Lym4    | 0.0000 | No |
| 35917 | Lym5    | 0.0000 | No |
| 35918 | Lym7    | 0.0000 | No |
| 35919 | Lym7os  | 0.0000 | No |
| 35920 | Lym9    | 0.0000 | No |
| 35921 | Lysmd1  | 0.0000 | No |
| 35922 | Lysmd2  | 0.0000 | No |
| 35923 | Lysmd3  | 0.0000 | No |

|       |               |        |    |
|-------|---------------|--------|----|
| 35924 | Lysmd4        | 0.0000 | No |
| 35925 | Lyst          | 0.0000 | No |
| 35926 | Lyve1         | 0.0000 | No |
| 35927 | Lyz1          | 0.0000 | No |
| 35928 | Lyz2          | 0.0000 | No |
| 35929 | Lyzl1         | 0.0000 | No |
| 35930 | Lyzl4os       | 0.0000 | No |
| 35931 | Lyzl6         | 0.0000 | No |
| 35932 | Lzic          | 0.0000 | No |
| 35933 | Lztl1         | 0.0000 | No |
| 35934 | Lztr1         | 0.0000 | No |
| 35935 | Lzts1         | 0.0000 | No |
| 35936 | Lzts2         | 0.0000 | No |
| 35937 | Lzts3         | 0.0000 | No |
| 35938 | M1ap          | 0.0000 | No |
| 35939 | M5C1000I18Rik | 0.0000 | No |
| 35940 | M6pr-ps       | 0.0000 | No |
| 35941 | Maats1        | 0.0000 | No |
| 35942 | Maats1os      | 0.0000 | No |
| 35943 | Mab2111       | 0.0000 | No |
| 35944 | Mab2113       | 0.0000 | No |
| 35945 | Macc1         | 0.0000 | No |
| 35946 | Macf1         | 0.0000 | No |
| 35947 | Macro1        | 0.0000 | No |
| 35948 | Macro2        | 0.0000 | No |
| 35949 | Macro2os1     | 0.0000 | No |
| 35950 | Macro2os2     | 0.0000 | No |
| 35951 | Mad111        | 0.0000 | No |
| 35952 | Mad211        | 0.0000 | No |
| 35953 | Mad211bp      | 0.0000 | No |
| 35954 | Mad212        | 0.0000 | No |
| 35955 | Madcam1       | 0.0000 | No |
| 35956 | Madd          | 0.0000 | No |
| 35957 | Maea          | 0.0000 | No |
| 35958 | Mael          | 0.0000 | No |
| 35959 | Maf           | 0.0000 | No |
| 35960 | Maf1          | 0.0000 | No |
| 35961 | Mafa          | 0.0000 | No |
| 35962 | Mafb          | 0.0000 | No |
| 35963 | Maff          | 0.0000 | No |
| 35964 | Mafg          | 0.0000 | No |
| 35965 | Mafk          | 0.0000 | No |
| 35966 | Magea1        | 0.0000 | No |
| 35967 | Magea10       | 0.0000 | No |
| 35968 | Magea2        | 0.0000 | No |
| 35969 | Magea3        | 0.0000 | No |

|       |             |        |    |
|-------|-------------|--------|----|
| 35970 | Magea4      | 0.0000 | No |
| 35971 | Magea5      | 0.0000 | No |
| 35972 | Magea6      | 0.0000 | No |
| 35973 | Magea7-ps   | 0.0000 | No |
| 35974 | Magea8      | 0.0000 | No |
| 35975 | Magea9-ps   | 0.0000 | No |
| 35976 | Mageb1      | 0.0000 | No |
| 35977 | Mageb10-ps  | 0.0000 | No |
| 35978 | Mageb16     | 0.0000 | No |
| 35979 | Mageb16-ps1 | 0.0000 | No |
| 35980 | Mageb16-ps2 | 0.0000 | No |
| 35981 | Mageb2      | 0.0000 | No |
| 35982 | Mageb3      | 0.0000 | No |
| 35983 | Mageb4      | 0.0000 | No |
| 35984 | Mageb6-ps   | 0.0000 | No |
| 35985 | Maged1      | 0.0000 | No |
| 35986 | Maged2      | 0.0000 | No |
| 35987 | Magee1      | 0.0000 | No |
| 35988 | Magee2      | 0.0000 | No |
| 35989 | Mage12      | 0.0000 | No |
| 35990 | Magi1       | 0.0000 | No |
| 35991 | Magi2       | 0.0000 | No |
| 35992 | Magi3       | 0.0000 | No |
| 35993 | Magix       | 0.0000 | No |
| 35994 | Magoh       | 0.0000 | No |
| 35995 | Magohb      | 0.0000 | No |
| 35996 | Magt1       | 0.0000 | No |
| 35997 | Majin       | 0.0000 | No |
| 35998 | Mak         | 0.0000 | No |
| 35999 | Mak16       | 0.0000 | No |
| 36000 | Mal         | 0.0000 | No |
| 36001 | Mal2        | 0.0000 | No |
| 36002 | Malat1      | 0.0000 | No |
| 36003 | Mall        | 0.0000 | No |
| 36004 | Malrd1      | 0.0000 | No |
| 36005 | Malsu1      | 0.0000 | No |
| 36006 | Malt1       | 0.0000 | No |
| 36007 | Mamdc2      | 0.0000 | No |
| 36008 | Mamdc4      | 0.0000 | No |
| 36009 | Maml1       | 0.0000 | No |
| 36010 | Maml2       | 0.0000 | No |
| 36011 | Maml3       | 0.0000 | No |
| 36012 | Mamld1      | 0.0000 | No |
| 36013 | Mamstr      | 0.0000 | No |
| 36014 | Man1a       | 0.0000 | No |
| 36015 | Man1a2      | 0.0000 | No |

|       |          |        |    |
|-------|----------|--------|----|
| 36016 | Man1b1   | 0.0000 | No |
| 36017 | Man2a1   | 0.0000 | No |
| 36018 | Man2a2   | 0.0000 | No |
| 36019 | Man2b1   | 0.0000 | No |
| 36020 | Man2b2   | 0.0000 | No |
| 36021 | Man2c1   | 0.0000 | No |
| 36022 | Man2c1os | 0.0000 | No |
| 36023 | Manba    | 0.0000 | No |
| 36024 | Manbal   | 0.0000 | No |
| 36025 | Manea    | 0.0000 | No |
| 36026 | Maneal   | 0.0000 | No |
| 36027 | Manf     | 0.0000 | No |
| 36028 | Mannr    | 0.0000 | No |
| 36029 | Mansc1   | 0.0000 | No |
| 36030 | Mansc4   | 0.0000 | No |
| 36031 | Maoa     | 0.0000 | No |
| 36032 | Maob     | 0.0000 | No |
| 36033 | Map10    | 0.0000 | No |
| 36034 | Map1a    | 0.0000 | No |
| 36035 | Map1b    | 0.0000 | No |
| 36036 | Map1lc3a | 0.0000 | No |
| 36037 | Map1lc3b | 0.0000 | No |
| 36038 | Map1s    | 0.0000 | No |
| 36039 | Map2     | 0.0000 | No |
| 36040 | Map2k1   | 0.0000 | No |
| 36041 | Map2k2   | 0.0000 | No |
| 36042 | Map2k3   | 0.0000 | No |
| 36043 | Map2k3os | 0.0000 | No |
| 36044 | Map2k4   | 0.0000 | No |
| 36045 | Map2k5   | 0.0000 | No |
| 36046 | Map2k6   | 0.0000 | No |
| 36047 | Map2k7   | 0.0000 | No |
| 36048 | Map3k1   | 0.0000 | No |
| 36049 | Map3k10  | 0.0000 | No |
| 36050 | Map3k11  | 0.0000 | No |
| 36051 | Map3k12  | 0.0000 | No |
| 36052 | Map3k13  | 0.0000 | No |
| 36053 | Map3k14  | 0.0000 | No |
| 36054 | Map3k15  | 0.0000 | No |
| 36055 | Map3k19  | 0.0000 | No |
| 36056 | Map3k2   | 0.0000 | No |
| 36057 | Map3k3   | 0.0000 | No |
| 36058 | Map3k4   | 0.0000 | No |
| 36059 | Map3k5   | 0.0000 | No |
| 36060 | Map3k6   | 0.0000 | No |
| 36061 | Map3k7   | 0.0000 | No |



|       |          |        |    |
|-------|----------|--------|----|
| 36062 | Map3k7cl | 0.0000 | No |
| 36063 | Map3k8   | 0.0000 | No |
| 36064 | Map3k9   | 0.0000 | No |
| 36065 | Map4k3   | 0.0000 | No |
| 36066 | Map4k4   | 0.0000 | No |
| 36067 | Map4k5   | 0.0000 | No |
| 36068 | Map6     | 0.0000 | No |
| 36069 | Map6d1   | 0.0000 | No |
| 36070 | Map7     | 0.0000 | No |
| 36071 | Map7d2   | 0.0000 | No |
| 36072 | Map9     | 0.0000 | No |
| 36073 | Mapk1    | 0.0000 | No |
| 36074 | Mapk10   | 0.0000 | No |
| 36075 | Mapk11   | 0.0000 | No |
| 36076 | Mapk12   | 0.0000 | No |
| 36077 | Mapk14   | 0.0000 | No |
| 36078 | Mapk1ip1 | 0.0000 | No |
| 36079 | Mapk3    | 0.0000 | No |
| 36080 | Mapk6    | 0.0000 | No |
| 36081 | Mapk7    | 0.0000 | No |
| 36082 | Mapk8    | 0.0000 | No |
| 36083 | Mapk8ip2 | 0.0000 | No |
| 36084 | Mapk8ip3 | 0.0000 | No |
| 36085 | Mapk9    | 0.0000 | No |
| 36086 | Mapkap1  | 0.0000 | No |
| 36087 | Mapkap2  | 0.0000 | No |
| 36088 | Mapkap3  | 0.0000 | No |
| 36089 | Mapkap5  | 0.0000 | No |
| 36090 | Mapkbp1  | 0.0000 | No |
| 36091 | Mapre1   | 0.0000 | No |
| 36092 | Mapre2   | 0.0000 | No |
| 36093 | Mapre3   | 0.0000 | No |
| 36094 | Mapt     | 0.0000 | No |
| 36095 | 1-Mar    | 0.0000 | No |
| 36096 | 2-Mar    | 0.0000 | No |
| 36097 | 1-Mar    | 0.0000 | No |
| 36098 | 10-Mar   | 0.0000 | No |
| 36099 | 2-Mar    | 0.0000 | No |
| 36100 | 3-Mar    | 0.0000 | No |
| 36101 | 4-Mar    | 0.0000 | No |
| 36102 | 5-Mar    | 0.0000 | No |
| 36103 | 6-Mar    | 0.0000 | No |
| 36104 | 7-Mar    | 0.0000 | No |
| 36105 | 9-Mar    | 0.0000 | No |
| 36106 | Marcks   | 0.0000 | No |
| 36107 | Marcks11 | 0.0000 | No |

|       |              |        |    |
|-------|--------------|--------|----|
| 36108 | Marcksl1-ps4 | 0.0000 | No |
| 36109 | Marco        | 0.0000 | No |
| 36110 | Marf1        | 0.0000 | No |
| 36111 | Mark1        | 0.0000 | No |
| 36112 | Mark1-ps1    | 0.0000 | No |
| 36113 | Mark1-ps2    | 0.0000 | No |
| 36114 | Mark1-ps3    | 0.0000 | No |
| 36115 | Mark2        | 0.0000 | No |
| 36116 | Mark3        | 0.0000 | No |
| 36117 | Mark4        | 0.0000 | No |
| 36118 | Mars         | 0.0000 | No |
| 36119 | Mars2        | 0.0000 | No |
| 36120 | Marveld1     | 0.0000 | No |
| 36121 | Marveld2     | 0.0000 | No |
| 36122 | Mas1         | 0.0000 | No |
| 36123 | Masp1        | 0.0000 | No |
| 36124 | Masp2        | 0.0000 | No |
| 36125 | Mast1        | 0.0000 | No |
| 36126 | Mast2        | 0.0000 | No |
| 36127 | Mast3        | 0.0000 | No |
| 36128 | Mast4        | 0.0000 | No |
| 36129 | Mastl        | 0.0000 | No |
| 36130 | Mat1a        | 0.0000 | No |
| 36131 | Mat2a        | 0.0000 | No |
| 36132 | Mat2b        | 0.0000 | No |
| 36133 | Matn1        | 0.0000 | No |
| 36134 | Matn2        | 0.0000 | No |
| 36135 | Matn3        | 0.0000 | No |
| 36136 | Matn4        | 0.0000 | No |
| 36137 | Matr3        | 0.0000 | No |
| 36138 | Matr3-ps2    | 0.0000 | No |
| 36139 | Mau2         | 0.0000 | No |
| 36140 | Mavs         | 0.0000 | No |
| 36141 | Max          | 0.0000 | No |
| 36142 | Maz          | 0.0000 | No |
| 36143 | Mb           | 0.0000 | No |
| 36144 | Mb21d1       | 0.0000 | No |
| 36145 | Mbd1         | 0.0000 | No |
| 36146 | Mbd2         | 0.0000 | No |
| 36147 | Mbd3         | 0.0000 | No |
| 36148 | Mbd3l2       | 0.0000 | No |
| 36149 | Mbd4         | 0.0000 | No |
| 36150 | Mbd5         | 0.0000 | No |
| 36151 | Mbd6         | 0.0000 | No |
| 36152 | Mbip         | 0.0000 | No |
| 36153 | Mbl1         | 0.0000 | No |

|       |         |        |    |
|-------|---------|--------|----|
| 36154 | Mblac1  | 0.0000 | No |
| 36155 | Mblac2  | 0.0000 | No |
| 36156 | Mbnl1   | 0.0000 | No |
| 36157 | Mbnl2   | 0.0000 | No |
| 36158 | Mbnl3   | 0.0000 | No |
| 36159 | Mboat2  | 0.0000 | No |
| 36160 | Mboat4  | 0.0000 | No |
| 36161 | Mboat7  | 0.0000 | No |
| 36162 | Mbp     | 0.0000 | No |
| 36163 | Mbtd1   | 0.0000 | No |
| 36164 | Mbtps1  | 0.0000 | No |
| 36165 | Mbtps2  | 0.0000 | No |
| 36166 | Mc1r    | 0.0000 | No |
| 36167 | Mc2r    | 0.0000 | No |
| 36168 | Mc5r    | 0.0000 | No |
| 36169 | Mcam    | 0.0000 | No |
| 36170 | Mcat    | 0.0000 | No |
| 36171 | Mcc     | 0.0000 | No |
| 36172 | Mccc1   | 0.0000 | No |
| 36173 | Mccc1os | 0.0000 | No |
| 36174 | Mccc2   | 0.0000 | No |
| 36175 | Mcee    | 0.0000 | No |
| 36176 | Mcf2    | 0.0000 | No |
| 36177 | Mcf2l   | 0.0000 | No |
| 36178 | Mcfd2   | 0.0000 | No |
| 36179 | Mchr1   | 0.0000 | No |
| 36180 | Mcidas  | 0.0000 | No |
| 36181 | Mcl1    | 0.0000 | No |
| 36182 | Mcm10   | 0.0000 | No |
| 36183 | Mcm2    | 0.0000 | No |
| 36184 | Mcm3    | 0.0000 | No |
| 36185 | Mcm3ap  | 0.0000 | No |
| 36186 | Mcm4    | 0.0000 | No |
| 36187 | Mcm5    | 0.0000 | No |
| 36188 | Mcm6    | 0.0000 | No |
| 36189 | Mcm7    | 0.0000 | No |
| 36190 | Mcm8    | 0.0000 | No |
| 36191 | Mcm9    | 0.0000 | No |
| 36192 | Mcmbp   | 0.0000 | No |
| 36193 | Mcmdc2  | 0.0000 | No |
| 36194 | Mcoln1  | 0.0000 | No |
| 36195 | Mcoln2  | 0.0000 | No |
| 36196 | Mcph1   | 0.0000 | No |
| 36197 | Mcpt1   | 0.0000 | No |
| 36198 | Mcpt4   | 0.0000 | No |
| 36199 | Mcpt8   | 0.0000 | No |

|       |         |        |    |
|-------|---------|--------|----|
| 36200 | Mcpt9   | 0.0000 | No |
| 36201 | Mcrs1   | 0.0000 | No |
| 36202 | Mctp1   | 0.0000 | No |
| 36203 | Mctp2   | 0.0000 | No |
| 36204 | Mcts1   | 0.0000 | No |
| 36205 | Mcts2   | 0.0000 | No |
| 36206 | Mcu     | 0.0000 | No |
| 36207 | Mcur1   | 0.0000 | No |
| 36208 | Mdc1    | 0.0000 | No |
| 36209 | Mdfi    | 0.0000 | No |
| 36210 | Mdfic   | 0.0000 | No |
| 36211 | Mdga1   | 0.0000 | No |
| 36212 | Mdga2   | 0.0000 | No |
| 36213 | Mdh1    | 0.0000 | No |
| 36214 | Mdh1b   | 0.0000 | No |
| 36215 | Mdk     | 0.0000 | No |
| 36216 | Mdk-ps1 | 0.0000 | No |
| 36217 | Mdm1    | 0.0000 | No |
| 36218 | Mdm2    | 0.0000 | No |
| 36219 | Mdm4    | 0.0000 | No |
| 36220 | Mdm4-ps | 0.0000 | No |
| 36221 | Mdn1    | 0.0000 | No |
| 36222 | Mdp1    | 0.0000 | No |
| 36223 | Mdrl    | 0.0000 | No |
| 36224 | Me1     | 0.0000 | No |
| 36225 | Me2     | 0.0000 | No |
| 36226 | Me3     | 0.0000 | No |
| 36227 | Mea1    | 0.0000 | No |
| 36228 | Meaf6   | 0.0000 | No |
| 36229 | Mecom   | 0.0000 | No |
| 36230 | Mecomos | 0.0000 | No |
| 36231 | Mecp2   | 0.0000 | No |
| 36232 | Mecr    | 0.0000 | No |
| 36233 | Med1    | 0.0000 | No |
| 36234 | Med10   | 0.0000 | No |
| 36235 | Med11   | 0.0000 | No |
| 36236 | Med12   | 0.0000 | No |
| 36237 | Med121  | 0.0000 | No |
| 36238 | Med13   | 0.0000 | No |
| 36239 | Med131  | 0.0000 | No |
| 36240 | Med14   | 0.0000 | No |
| 36241 | Med15   | 0.0000 | No |
| 36242 | Med16   | 0.0000 | No |
| 36243 | Med17   | 0.0000 | No |
| 36244 | Med18   | 0.0000 | No |
| 36245 | Med19   | 0.0000 | No |

|       |        |        |    |
|-------|--------|--------|----|
| 36246 | Med20  | 0.0000 | No |
| 36247 | Med21  | 0.0000 | No |
| 36248 | Med22  | 0.0000 | No |
| 36249 | Med23  | 0.0000 | No |
| 36250 | Med24  | 0.0000 | No |
| 36251 | Med25  | 0.0000 | No |
| 36252 | Med26  | 0.0000 | No |
| 36253 | Med27  | 0.0000 | No |
| 36254 | Med28  | 0.0000 | No |
| 36255 | Med29  | 0.0000 | No |
| 36256 | Med30  | 0.0000 | No |
| 36257 | Med31  | 0.0000 | No |
| 36258 | Med4   | 0.0000 | No |
| 36259 | Med6   | 0.0000 | No |
| 36260 | Med7   | 0.0000 | No |
| 36261 | Med8   | 0.0000 | No |
| 36262 | Med9   | 0.0000 | No |
| 36263 | Medag  | 0.0000 | No |
| 36264 | Mef2a  | 0.0000 | No |
| 36265 | Mef2b  | 0.0000 | No |
| 36266 | Mef2d  | 0.0000 | No |
| 36267 | Meg3   | 0.0000 | No |
| 36268 | MEG3_2 | 0.0000 | No |
| 36269 | MEG8_1 | 0.0000 | No |
| 36270 | Megf10 | 0.0000 | No |
| 36271 | Megf11 | 0.0000 | No |
| 36272 | Megf6  | 0.0000 | No |
| 36273 | Megf8  | 0.0000 | No |
| 36274 | Megf9  | 0.0000 | No |
| 36275 | Mei1   | 0.0000 | No |
| 36276 | Mei4   | 0.0000 | No |
| 36277 | Meig1  | 0.0000 | No |
| 36278 | Meikin | 0.0000 | No |
| 36279 | Meiob  | 0.0000 | No |
| 36280 | Meis2  | 0.0000 | No |
| 36281 | Meis3  | 0.0000 | No |
| 36282 | Melk   | 0.0000 | No |
| 36283 | Memo1  | 0.0000 | No |
| 36284 | Men1   | 0.0000 | No |
| 36285 | Meox2  | 0.0000 | No |
| 36286 | Mep1a  | 0.0000 | No |
| 36287 | Mep1b  | 0.0000 | No |
| 36288 | Mepce  | 0.0000 | No |
| 36289 | Mepe   | 0.0000 | No |
| 36290 | Mesdc1 | 0.0000 | No |
| 36291 | Mesdc2 | 0.0000 | No |

|       |            |        |    |
|-------|------------|--------|----|
| 36292 | Mesp1      | 0.0000 | No |
| 36293 | Mesp2      | 0.0000 | No |
| 36294 | Mest       | 0.0000 | No |
| 36295 | Met        | 0.0000 | No |
| 36296 | Metap1     | 0.0000 | No |
| 36297 | Metap1d    | 0.0000 | No |
| 36298 | Metap2     | 0.0000 | No |
| 36299 | Methig1    | 0.0000 | No |
| 36300 | Metrn      | 0.0000 | No |
| 36301 | Metrn1     | 0.0000 | No |
| 36302 | Mettl1     | 0.0000 | No |
| 36303 | Mettl10    | 0.0000 | No |
| 36304 | Mettl11b   | 0.0000 | No |
| 36305 | Mettl13    | 0.0000 | No |
| 36306 | Mettl14    | 0.0000 | No |
| 36307 | Mettl15    | 0.0000 | No |
| 36308 | Mettl16    | 0.0000 | No |
| 36309 | Mettl17    | 0.0000 | No |
| 36310 | Mettl18    | 0.0000 | No |
| 36311 | Mettl2     | 0.0000 | No |
| 36312 | Mettl21a   | 0.0000 | No |
| 36313 | Mettl21b   | 0.0000 | No |
| 36314 | Mettl21c   | 0.0000 | No |
| 36315 | Mettl21e   | 0.0000 | No |
| 36316 | Mettl22    | 0.0000 | No |
| 36317 | Mettl23    | 0.0000 | No |
| 36318 | Mettl24    | 0.0000 | No |
| 36319 | Mettl25    | 0.0000 | No |
| 36320 | Mettl26    | 0.0000 | No |
| 36321 | Mettl3     | 0.0000 | No |
| 36322 | Mettl4     | 0.0000 | No |
| 36323 | Mettl4-ps1 | 0.0000 | No |
| 36324 | Mettl5     | 0.0000 | No |
| 36325 | Mettl5os   | 0.0000 | No |
| 36326 | Mettl6     | 0.0000 | No |
| 36327 | Mettl7a1   | 0.0000 | No |
| 36328 | Mettl7a2   | 0.0000 | No |
| 36329 | Mettl7b    | 0.0000 | No |
| 36330 | Mettl8     | 0.0000 | No |
| 36331 | Mettl9     | 0.0000 | No |
| 36332 | Mex3c      | 0.0000 | No |
| 36333 | Mex3d      | 0.0000 | No |
| 36334 | Mfap1a     | 0.0000 | No |
| 36335 | Mfap1b     | 0.0000 | No |
| 36336 | Mfap2      | 0.0000 | No |
| 36337 | Mfap3      | 0.0000 | No |

|       |          |        |    |
|-------|----------|--------|----|
| 36338 | Mfap3l   | 0.0000 | No |
| 36339 | Mfap4    | 0.0000 | No |
| 36340 | Mfap5    | 0.0000 | No |
| 36341 | Mff      | 0.0000 | No |
| 36342 | Mfhas1   | 0.0000 | No |
| 36343 | Mfi2     | 0.0000 | No |
| 36344 | Mfn1     | 0.0000 | No |
| 36345 | Mfn2     | 0.0000 | No |
| 36346 | Mfng     | 0.0000 | No |
| 36347 | Mfsd1    | 0.0000 | No |
| 36348 | Mfsd10   | 0.0000 | No |
| 36349 | Mfsd11   | 0.0000 | No |
| 36350 | Mfsd12   | 0.0000 | No |
| 36351 | Mfsd13a  | 0.0000 | No |
| 36352 | Mfsd13b  | 0.0000 | No |
| 36353 | Mfsd14a  | 0.0000 | No |
| 36354 | Mfsd14b  | 0.0000 | No |
| 36355 | Mfsd2a   | 0.0000 | No |
| 36356 | Mfsd2b   | 0.0000 | No |
| 36357 | Mfsd3    | 0.0000 | No |
| 36358 | Mfsd4a   | 0.0000 | No |
| 36359 | Mfsd4b2  | 0.0000 | No |
| 36360 | Mfsd4b3  | 0.0000 | No |
| 36361 | Mfsd4b4  | 0.0000 | No |
| 36362 | Mfsd4b5  | 0.0000 | No |
| 36363 | Mfsd5    | 0.0000 | No |
| 36364 | Mfsd6    | 0.0000 | No |
| 36365 | Mfsd6l   | 0.0000 | No |
| 36366 | Mfsd7a   | 0.0000 | No |
| 36367 | Mfsd7b   | 0.0000 | No |
| 36368 | Mfsd7c   | 0.0000 | No |
| 36369 | Mfsd8    | 0.0000 | No |
| 36370 | Mfsd9    | 0.0000 | No |
| 36371 | Mga      | 0.0000 | No |
| 36372 | Mgam     | 0.0000 | No |
| 36373 | Mgam2-ps | 0.0000 | No |
| 36374 | Mgarp    | 0.0000 | No |
| 36375 | Mgat1    | 0.0000 | No |
| 36376 | Mgat2    | 0.0000 | No |
| 36377 | Mgat3    | 0.0000 | No |
| 36378 | Mgat4a   | 0.0000 | No |
| 36379 | Mgat4b   | 0.0000 | No |
| 36380 | Mgat4c   | 0.0000 | No |
| 36381 | Mgat4d   | 0.0000 | No |
| 36382 | Mgat4e   | 0.0000 | No |
| 36383 | Mgat5b   | 0.0000 | No |

|       |           |        |    |
|-------|-----------|--------|----|
| 36384 | Mgea5     | 0.0000 | No |
| 36385 | Mgl2      | 0.0000 | No |
| 36386 | Mgll      | 0.0000 | No |
| 36387 | Mgme1     | 0.0000 | No |
| 36388 | Mgmt      | 0.0000 | No |
| 36389 | Mgst1     | 0.0000 | No |
| 36390 | Mgst2     | 0.0000 | No |
| 36391 | Mgst3     | 0.0000 | No |
| 36392 | Mhrt      | 0.0000 | No |
| 36393 | Mia2      | 0.0000 | No |
| 36394 | Mia3      | 0.0000 | No |
| 36395 | Miat      | 0.0000 | No |
| 36396 | Mib1      | 0.0000 | No |
| 36397 | Mib2      | 0.0000 | No |
| 36398 | Mical1    | 0.0000 | No |
| 36399 | Mical2    | 0.0000 | No |
| 36400 | Mical3    | 0.0000 | No |
| 36401 | Micalc1   | 0.0000 | No |
| 36402 | Micall1   | 0.0000 | No |
| 36403 | Micall2   | 0.0000 | No |
| 36404 | Mico1     | 0.0000 | No |
| 36405 | Micu1     | 0.0000 | No |
| 36406 | Micu2     | 0.0000 | No |
| 36407 | Micu3     | 0.0000 | No |
| 36408 | Mid1      | 0.0000 | No |
| 36409 | Mid1ip1   | 0.0000 | No |
| 36410 | Mid2      | 0.0000 | No |
| 36411 | Mief1     | 0.0000 | No |
| 36412 | Mief2     | 0.0000 | No |
| 36413 | Mien1     | 0.0000 | No |
| 36414 | Mier1     | 0.0000 | No |
| 36415 | Mier2     | 0.0000 | No |
| 36416 | Mier3     | 0.0000 | No |
| 36417 | Mif       | 0.0000 | No |
| 36418 | Mif4gd    | 0.0000 | No |
| 36419 | Mif-ps3   | 0.0000 | No |
| 36420 | Miga1     | 0.0000 | No |
| 36421 | Miga2     | 0.0000 | No |
| 36422 | Miip      | 0.0000 | No |
| 36423 | Mill2     | 0.0000 | No |
| 36424 | Milr1     | 0.0000 | No |
| 36425 | Mina      | 0.0000 | No |
| 36426 | Mink1     | 0.0000 | No |
| 36427 | Minos1    | 0.0000 | No |
| 36428 | Minpp1    | 0.0000 | No |
| 36429 | Minpp1-ps | 0.0000 | No |



|       |             |        |    |
|-------|-------------|--------|----|
| 36430 | Mios        | 0.0000 | No |
| 36431 | Miox        | 0.0000 | No |
| 36432 | Mipep       | 0.0000 | No |
| 36433 | Mipepos     | 0.0000 | No |
| 36434 | Mipep-ps    | 0.0000 | No |
| 36435 | Mipoll      | 0.0000 | No |
| 36436 | Mir100      | 0.0000 | No |
| 36437 | Mir101a     | 0.0000 | No |
| 36438 | Mir101b     | 0.0000 | No |
| 36439 | Mir101c     | 0.0000 | No |
| 36440 | Mir103-1    | 0.0000 | No |
| 36441 | Mir103-2    | 0.0000 | No |
| 36442 | Mir105      | 0.0000 | No |
| 36443 | Mir106a     | 0.0000 | No |
| 36444 | Mir106b     | 0.0000 | No |
| 36445 | Mir107      | 0.0000 | No |
| 36446 | Mir10a      | 0.0000 | No |
| 36447 | Mir10b      | 0.0000 | No |
| 36448 | Mir1187     | 0.0000 | No |
| 36449 | Mir1188     | 0.0000 | No |
| 36450 | Mir1191     | 0.0000 | No |
| 36451 | Mir1191b    | 0.0000 | No |
| 36452 | Mir1192     | 0.0000 | No |
| 36453 | Mir1195     | 0.0000 | No |
| 36454 | Mir1197     | 0.0000 | No |
| 36455 | Mir1198     | 0.0000 | No |
| 36456 | Mir1199     | 0.0000 | No |
| 36457 | Mir122      | 0.0000 | No |
| 36458 | Mir1224     | 0.0000 | No |
| 36459 | Mir1231     | 0.0000 | No |
| 36460 | Mir124-2hg  | 0.0000 | No |
| 36461 | Mir1247     | 0.0000 | No |
| 36462 | Mir1249     | 0.0000 | No |
| 36463 | Mir124a-1   | 0.0000 | No |
| 36464 | Mir124a-1hg | 0.0000 | No |
| 36465 | Mir124a-2   | 0.0000 | No |
| 36466 | Mir124a-3   | 0.0000 | No |
| 36467 | Mir1251     | 0.0000 | No |
| 36468 | Mir1258     | 0.0000 | No |
| 36469 | Mir125a     | 0.0000 | No |
| 36470 | Mir125b-1   | 0.0000 | No |
| 36471 | Mir125b-2   | 0.0000 | No |
| 36472 | Mir1264     | 0.0000 | No |
| 36473 | Mir126a     | 0.0000 | No |
| 36474 | Mir126b     | 0.0000 | No |
| 36475 | Mir127      | 0.0000 | No |

|       |             |        |    |
|-------|-------------|--------|----|
| 36476 | Mir128-1    | 0.0000 | No |
| 36477 | Mir1291     | 0.0000 | No |
| 36478 | Mir129-1    | 0.0000 | No |
| 36479 | Mir129-2    | 0.0000 | No |
| 36480 | Mir1298     | 0.0000 | No |
| 36481 | Mir129b     | 0.0000 | No |
| 36482 | Mir1306     | 0.0000 | No |
| 36483 | Mir130b     | 0.0000 | No |
| 36484 | Mir130c     | 0.0000 | No |
| 36485 | Mir133a-1hg | 0.0000 | No |
| 36486 | Mir133a-2   | 0.0000 | No |
| 36487 | Mir133b     | 0.0000 | No |
| 36488 | Mir133c     | 0.0000 | No |
| 36489 | Mir134      | 0.0000 | No |
| 36490 | Mir135a-1   | 0.0000 | No |
| 36491 | Mir135a-2   | 0.0000 | No |
| 36492 | Mir135b     | 0.0000 | No |
| 36493 | Mir136      | 0.0000 | No |
| 36494 | Mir137      | 0.0000 | No |
| 36495 | Mir138-1    | 0.0000 | No |
| 36496 | Mir138-2    | 0.0000 | No |
| 36497 | Mir139      | 0.0000 | No |
| 36498 | Mir140      | 0.0000 | No |
| 36499 | Mir141      | 0.0000 | No |
| 36500 | Mir142      | 0.0000 | No |
| 36501 | Mir142b     | 0.0000 | No |
| 36502 | Mir142hg    | 0.0000 | No |
| 36503 | Mir143      | 0.0000 | No |
| 36504 | Mir145a     | 0.0000 | No |
| 36505 | Mir145b     | 0.0000 | No |
| 36506 | Mir146b     | 0.0000 | No |
| 36507 | Mir147      | 0.0000 | No |
| 36508 | Mir148b     | 0.0000 | No |
| 36509 | Mir149      | 0.0000 | No |
| 36510 | Mir150      | 0.0000 | No |
| 36511 | Mir151      | 0.0000 | No |
| 36512 | Mir152      | 0.0000 | No |
| 36513 | Mir153      | 0.0000 | No |
| 36514 | Mir154      | 0.0000 | No |
| 36515 | Mir155      | 0.0000 | No |
| 36516 | Mir155hg    | 0.0000 | No |
| 36517 | Mir16-1     | 0.0000 | No |
| 36518 | Mir16-2     | 0.0000 | No |
| 36519 | Mir1668     | 0.0000 | No |
| 36520 | Mir17       | 0.0000 | No |
| 36521 | Mir17hg     | 0.0000 | No |

|       |           |        |    |
|-------|-----------|--------|----|
| 36522 | Mir18     | 0.0000 | No |
| 36523 | Mir181a-1 | 0.0000 | No |
| 36524 | Mir181a-2 | 0.0000 | No |
| 36525 | Mir181b-1 | 0.0000 | No |
| 36526 | Mir181b-2 | 0.0000 | No |
| 36527 | Mir181c   | 0.0000 | No |
| 36528 | Mir181d   | 0.0000 | No |
| 36529 | Mir182    | 0.0000 | No |
| 36530 | Mir183    | 0.0000 | No |
| 36531 | Mir1839   | 0.0000 | No |
| 36532 | Mir184    | 0.0000 | No |
| 36533 | Mir1843a  | 0.0000 | No |
| 36534 | Mir1843b  | 0.0000 | No |
| 36535 | Mir185    | 0.0000 | No |
| 36536 | Mir186    | 0.0000 | No |
| 36537 | Mir187    | 0.0000 | No |
| 36538 | Mir188    | 0.0000 | No |
| 36539 | Mir1892   | 0.0000 | No |
| 36540 | Mir1893   | 0.0000 | No |
| 36541 | Mir1894   | 0.0000 | No |
| 36542 | Mir1895   | 0.0000 | No |
| 36543 | Mir1896   | 0.0000 | No |
| 36544 | Mir1897   | 0.0000 | No |
| 36545 | Mir1898   | 0.0000 | No |
| 36546 | Mir1899   | 0.0000 | No |
| 36547 | Mir18b    | 0.0000 | No |
| 36548 | Mir1900   | 0.0000 | No |
| 36549 | Mir1901   | 0.0000 | No |
| 36550 | Mir1902   | 0.0000 | No |
| 36551 | Mir1903   | 0.0000 | No |
| 36552 | Mir1904   | 0.0000 | No |
| 36553 | Mir1905   | 0.0000 | No |
| 36554 | Mir1906-1 | 0.0000 | No |
| 36555 | Mir1906-2 | 0.0000 | No |
| 36556 | Mir1907   | 0.0000 | No |
| 36557 | Mir190a   | 0.0000 | No |
| 36558 | Mir190b   | 0.0000 | No |
| 36559 | Mir191    | 0.0000 | No |
| 36560 | Mir1912   | 0.0000 | No |
| 36561 | Mir192    | 0.0000 | No |
| 36562 | Mir1927   | 0.0000 | No |
| 36563 | Mir1928   | 0.0000 | No |
| 36564 | Mir1929   | 0.0000 | No |
| 36565 | Mir1930   | 0.0000 | No |
| 36566 | Mir1931   | 0.0000 | No |
| 36567 | Mir1932   | 0.0000 | No |

|       |           |        |    |
|-------|-----------|--------|----|
| 36568 | Mir1933   | 0.0000 | No |
| 36569 | Mir1934   | 0.0000 | No |
| 36570 | Mir1936   | 0.0000 | No |
| 36571 | Mir193a   | 0.0000 | No |
| 36572 | Mir193b   | 0.0000 | No |
| 36573 | Mir1941   | 0.0000 | No |
| 36574 | Mir194-1  | 0.0000 | No |
| 36575 | Mir194-2  | 0.0000 | No |
| 36576 | Mir1943   | 0.0000 | No |
| 36577 | Mir1945   | 0.0000 | No |
| 36578 | Mir1946a  | 0.0000 | No |
| 36579 | Mir1946b  | 0.0000 | No |
| 36580 | Mir1947   | 0.0000 | No |
| 36581 | Mir1948   | 0.0000 | No |
| 36582 | Mir1949   | 0.0000 | No |
| 36583 | Mir1951   | 0.0000 | No |
| 36584 | Mir1952   | 0.0000 | No |
| 36585 | Mir1955   | 0.0000 | No |
| 36586 | Mir1956   | 0.0000 | No |
| 36587 | Mir1957a  | 0.0000 | No |
| 36588 | Mir1957b  | 0.0000 | No |
| 36589 | Mir1958   | 0.0000 | No |
| 36590 | Mir195a   | 0.0000 | No |
| 36591 | Mir195b   | 0.0000 | No |
| 36592 | Mir1963   | 0.0000 | No |
| 36593 | Mir1964   | 0.0000 | No |
| 36594 | Mir1966   | 0.0000 | No |
| 36595 | Mir1967   | 0.0000 | No |
| 36596 | Mir1968   | 0.0000 | No |
| 36597 | Mir196a-1 | 0.0000 | No |
| 36598 | Mir196a-2 | 0.0000 | No |
| 36599 | Mir196b   | 0.0000 | No |
| 36600 | Mir1971   | 0.0000 | No |
| 36601 | Mir1981   | 0.0000 | No |
| 36602 | Mir1982   | 0.0000 | No |
| 36603 | Mir1983   | 0.0000 | No |
| 36604 | Mir199a-1 | 0.0000 | No |
| 36605 | Mir199a-2 | 0.0000 | No |
| 36606 | Mir199b   | 0.0000 | No |
| 36607 | Mir19a    | 0.0000 | No |
| 36608 | Mir19b-1  | 0.0000 | No |
| 36609 | Mir19b-2  | 0.0000 | No |
| 36610 | Mir1a-1   | 0.0000 | No |
| 36611 | Mir1a-2   | 0.0000 | No |
| 36612 | Mir1b     | 0.0000 | No |
| 36613 | Mir200b   | 0.0000 | No |

|       |           |        |    |
|-------|-----------|--------|----|
| 36614 | Mir200c   | 0.0000 | No |
| 36615 | Mir201    | 0.0000 | No |
| 36616 | Mir202    | 0.0000 | No |
| 36617 | Mir203    | 0.0000 | No |
| 36618 | Mir205    | 0.0000 | No |
| 36619 | Mir206    | 0.0000 | No |
| 36620 | Mir207    | 0.0000 | No |
| 36621 | Mir208a   | 0.0000 | No |
| 36622 | Mir208b   | 0.0000 | No |
| 36623 | Mir20a    | 0.0000 | No |
| 36624 | Mir20b    | 0.0000 | No |
| 36625 | Mir210    | 0.0000 | No |
| 36626 | Mir211    | 0.0000 | No |
| 36627 | Mir2136   | 0.0000 | No |
| 36628 | Mir2137   | 0.0000 | No |
| 36629 | Mir2139   | 0.0000 | No |
| 36630 | Mir214    | 0.0000 | No |
| 36631 | Mir215    | 0.0000 | No |
| 36632 | Mir216a   | 0.0000 | No |
| 36633 | Mir216b   | 0.0000 | No |
| 36634 | Mir216c   | 0.0000 | No |
| 36635 | Mir217    | 0.0000 | No |
| 36636 | Mir218-1  | 0.0000 | No |
| 36637 | Mir218-2  | 0.0000 | No |
| 36638 | Mir219a-1 | 0.0000 | No |
| 36639 | Mir219a-2 | 0.0000 | No |
| 36640 | Mir219b   | 0.0000 | No |
| 36641 | Mir219c   | 0.0000 | No |
| 36642 | Mir21a    | 0.0000 | No |
| 36643 | Mir21b    | 0.0000 | No |
| 36644 | Mir21c    | 0.0000 | No |
| 36645 | Mir22     | 0.0000 | No |
| 36646 | Mir221    | 0.0000 | No |
| 36647 | Mir222    | 0.0000 | No |
| 36648 | Mir223    | 0.0000 | No |
| 36649 | Mir224    | 0.0000 | No |
| 36650 | Mir23a    | 0.0000 | No |
| 36651 | Mir23b    | 0.0000 | No |
| 36652 | Mir24-1   | 0.0000 | No |
| 36653 | Mir25     | 0.0000 | No |
| 36654 | Mir26a-1  | 0.0000 | No |
| 36655 | Mir26a-2  | 0.0000 | No |
| 36656 | Mir26b    | 0.0000 | No |
| 36657 | Mir2861   | 0.0000 | No |
| 36658 | Mir28a    | 0.0000 | No |
| 36659 | Mir28c    | 0.0000 | No |

|       |           |        |    |
|-------|-----------|--------|----|
| 36660 | Mir290a   | 0.0000 | No |
| 36661 | Mir290b   | 0.0000 | No |
| 36662 | Mir291a   | 0.0000 | No |
| 36663 | Mir291b   | 0.0000 | No |
| 36664 | Mir292    | 0.0000 | No |
| 36665 | Mir292b   | 0.0000 | No |
| 36666 | Mir293    | 0.0000 | No |
| 36667 | Mir294    | 0.0000 | No |
| 36668 | Mir295    | 0.0000 | No |
| 36669 | Mir297-1  | 0.0000 | No |
| 36670 | Mir297a-3 | 0.0000 | No |
| 36671 | Mir297a-4 | 0.0000 | No |
| 36672 | Mir297b   | 0.0000 | No |
| 36673 | Mir298    | 0.0000 | No |
| 36674 | Mir299a   | 0.0000 | No |
| 36675 | Mir299b   | 0.0000 | No |
| 36676 | Mir29b-1  | 0.0000 | No |
| 36677 | Mir29b-2  | 0.0000 | No |
| 36678 | Mir29c    | 0.0000 | No |
| 36679 | Mir300    | 0.0000 | No |
| 36680 | Mir301b   | 0.0000 | No |
| 36681 | Mir302a   | 0.0000 | No |
| 36682 | Mir302b   | 0.0000 | No |
| 36683 | Mir302d   | 0.0000 | No |
| 36684 | Mir3057   | 0.0000 | No |
| 36685 | Mir3058   | 0.0000 | No |
| 36686 | Mir3059   | 0.0000 | No |
| 36687 | Mir3060   | 0.0000 | No |
| 36688 | Mir3061   | 0.0000 | No |
| 36689 | Mir3062   | 0.0000 | No |
| 36690 | Mir3063   | 0.0000 | No |
| 36691 | Mir3064   | 0.0000 | No |
| 36692 | Mir3065   | 0.0000 | No |
| 36693 | Mir3066   | 0.0000 | No |
| 36694 | Mir3067   | 0.0000 | No |
| 36695 | Mir3068   | 0.0000 | No |
| 36696 | Mir3069   | 0.0000 | No |
| 36697 | Mir3070a  | 0.0000 | No |
| 36698 | Mir3070b  | 0.0000 | No |
| 36699 | Mir3071   | 0.0000 | No |
| 36700 | Mir3072   | 0.0000 | No |
| 36701 | Mir3073a  | 0.0000 | No |
| 36702 | Mir3073b  | 0.0000 | No |
| 36703 | Mir3074-2 | 0.0000 | No |
| 36704 | Mir3075   | 0.0000 | No |
| 36705 | Mir3076   | 0.0000 | No |

|       |           |        |    |
|-------|-----------|--------|----|
| 36706 | Mir3077   | 0.0000 | No |
| 36707 | Mir3078   | 0.0000 | No |
| 36708 | Mir3080   | 0.0000 | No |
| 36709 | Mir3081   | 0.0000 | No |
| 36710 | Mir3082   | 0.0000 | No |
| 36711 | Mir3083   | 0.0000 | No |
| 36712 | Mir3084-1 | 0.0000 | No |
| 36713 | Mir3084-2 | 0.0000 | No |
| 36714 | Mir3086   | 0.0000 | No |
| 36715 | Mir3088   | 0.0000 | No |
| 36716 | Mir3089   | 0.0000 | No |
| 36717 | Mir3090   | 0.0000 | No |
| 36718 | Mir3091   | 0.0000 | No |
| 36719 | Mir3092   | 0.0000 | No |
| 36720 | Mir3093   | 0.0000 | No |
| 36721 | Mir3094   | 0.0000 | No |
| 36722 | Mir3095   | 0.0000 | No |
| 36723 | Mir3096   | 0.0000 | No |
| 36724 | Mir3097   | 0.0000 | No |
| 36725 | Mir3098   | 0.0000 | No |
| 36726 | Mir3099   | 0.0000 | No |
| 36727 | Mir30a    | 0.0000 | No |
| 36728 | Mir30b    | 0.0000 | No |
| 36729 | Mir30c-1  | 0.0000 | No |
| 36730 | Mir30c-2  | 0.0000 | No |
| 36731 | Mir30d    | 0.0000 | No |
| 36732 | Mir30e    | 0.0000 | No |
| 36733 | Mir30f    | 0.0000 | No |
| 36734 | Mir31     | 0.0000 | No |
| 36735 | Mir3100   | 0.0000 | No |
| 36736 | Mir3101   | 0.0000 | No |
| 36737 | Mir3102   | 0.0000 | No |
| 36738 | Mir3103   | 0.0000 | No |
| 36739 | Mir3104   | 0.0000 | No |
| 36740 | Mir3105   | 0.0000 | No |
| 36741 | Mir3106   | 0.0000 | No |
| 36742 | Mir3107   | 0.0000 | No |
| 36743 | Mir3108   | 0.0000 | No |
| 36744 | Mir3109   | 0.0000 | No |
| 36745 | Mir3110   | 0.0000 | No |
| 36746 | Mir3112   | 0.0000 | No |
| 36747 | Mir3113   | 0.0000 | No |
| 36748 | Mir32     | 0.0000 | No |
| 36749 | Mir320    | 0.0000 | No |
| 36750 | Mir322    | 0.0000 | No |
| 36751 | Mir323    | 0.0000 | No |

|       |           |        |    |
|-------|-----------|--------|----|
| 36752 | Mir324    | 0.0000 | No |
| 36753 | Mir325    | 0.0000 | No |
| 36754 | Mir326    | 0.0000 | No |
| 36755 | Mir327    | 0.0000 | No |
| 36756 | Mir328    | 0.0000 | No |
| 36757 | Mir329    | 0.0000 | No |
| 36758 | Mir33     | 0.0000 | No |
| 36759 | Mir330    | 0.0000 | No |
| 36760 | Mir331    | 0.0000 | No |
| 36761 | Mir335    | 0.0000 | No |
| 36762 | Mir337    | 0.0000 | No |
| 36763 | Mir338    | 0.0000 | No |
| 36764 | Mir339    | 0.0000 | No |
| 36765 | Mir340    | 0.0000 | No |
| 36766 | Mir341    | 0.0000 | No |
| 36767 | Mir342    | 0.0000 | No |
| 36768 | Mir344    | 0.0000 | No |
| 36769 | Mir344-2  | 0.0000 | No |
| 36770 | Mir344b   | 0.0000 | No |
| 36771 | Mir344c   | 0.0000 | No |
| 36772 | Mir344d-1 | 0.0000 | No |
| 36773 | Mir344d-2 | 0.0000 | No |
| 36774 | Mir344d-3 | 0.0000 | No |
| 36775 | Mir344e   | 0.0000 | No |
| 36776 | Mir344f   | 0.0000 | No |
| 36777 | Mir344g   | 0.0000 | No |
| 36778 | Mir344h-1 | 0.0000 | No |
| 36779 | Mir344h-2 | 0.0000 | No |
| 36780 | Mir344i   | 0.0000 | No |
| 36781 | Mir345    | 0.0000 | No |
| 36782 | Mir346    | 0.0000 | No |
| 36783 | Mir3470a  | 0.0000 | No |
| 36784 | Mir3470b  | 0.0000 | No |
| 36785 | Mir3471-2 | 0.0000 | No |
| 36786 | Mir3472   | 0.0000 | No |
| 36787 | Mir3473a  | 0.0000 | No |
| 36788 | Mir3473b  | 0.0000 | No |
| 36789 | Mir3473c  | 0.0000 | No |
| 36790 | Mir3473d  | 0.0000 | No |
| 36791 | Mir3473e  | 0.0000 | No |
| 36792 | Mir3473f  | 0.0000 | No |
| 36793 | Mir3473g  | 0.0000 | No |
| 36794 | Mir3474   | 0.0000 | No |
| 36795 | Mir3475   | 0.0000 | No |
| 36796 | Mir34a    | 0.0000 | No |
| 36797 | Mir34b    | 0.0000 | No |



|       |          |        |    |
|-------|----------|--------|----|
| 36798 | Mir34c   | 0.0000 | No |
| 36799 | Mir351   | 0.0000 | No |
| 36800 | Mir3544  | 0.0000 | No |
| 36801 | Mir3547  | 0.0000 | No |
| 36802 | Mir3569  | 0.0000 | No |
| 36803 | Mir3572  | 0.0000 | No |
| 36804 | Mir361   | 0.0000 | No |
| 36805 | Mir362   | 0.0000 | No |
| 36806 | Mir3620  | 0.0000 | No |
| 36807 | Mir363   | 0.0000 | No |
| 36808 | Mir365-1 | 0.0000 | No |
| 36809 | Mir365-2 | 0.0000 | No |
| 36810 | Mir367   | 0.0000 | No |
| 36811 | Mir369   | 0.0000 | No |
| 36812 | Mir370   | 0.0000 | No |
| 36813 | Mir374b  | 0.0000 | No |
| 36814 | Mir374c  | 0.0000 | No |
| 36815 | Mir375   | 0.0000 | No |
| 36816 | Mir376a  | 0.0000 | No |
| 36817 | Mir376b  | 0.0000 | No |
| 36818 | Mir376c  | 0.0000 | No |
| 36819 | Mir377   | 0.0000 | No |
| 36820 | Mir378a  | 0.0000 | No |
| 36821 | Mir378b  | 0.0000 | No |
| 36822 | Mir378c  | 0.0000 | No |
| 36823 | Mir378d  | 0.0000 | No |
| 36824 | Mir379   | 0.0000 | No |
| 36825 | Mir380   | 0.0000 | No |
| 36826 | Mir382   | 0.0000 | No |
| 36827 | Mir383   | 0.0000 | No |
| 36828 | Mir384   | 0.0000 | No |
| 36829 | Mir3960  | 0.0000 | No |
| 36830 | Mir3961  | 0.0000 | No |
| 36831 | Mir3962  | 0.0000 | No |
| 36832 | Mir3963  | 0.0000 | No |
| 36833 | Mir3964  | 0.0000 | No |
| 36834 | Mir3965  | 0.0000 | No |
| 36835 | Mir3966  | 0.0000 | No |
| 36836 | Mir3967  | 0.0000 | No |
| 36837 | Mir3968  | 0.0000 | No |
| 36838 | Mir3969  | 0.0000 | No |
| 36839 | Mir3970  | 0.0000 | No |
| 36840 | Mir3971  | 0.0000 | No |
| 36841 | Mir409   | 0.0000 | No |
| 36842 | Mir410   | 0.0000 | No |
| 36843 | Mir411   | 0.0000 | No |

|       |           |        |    |
|-------|-----------|--------|----|
| 36844 | Mir412    | 0.0000 | No |
| 36845 | Mir421    | 0.0000 | No |
| 36846 | Mir425    | 0.0000 | No |
| 36847 | Mir429    | 0.0000 | No |
| 36848 | Mir431    | 0.0000 | No |
| 36849 | Mir432    | 0.0000 | No |
| 36850 | Mir433    | 0.0000 | No |
| 36851 | Mir434    | 0.0000 | No |
| 36852 | Mir448    | 0.0000 | No |
| 36853 | Mir449a   | 0.0000 | No |
| 36854 | Mir449c   | 0.0000 | No |
| 36855 | Mir450-1  | 0.0000 | No |
| 36856 | Mir450-2  | 0.0000 | No |
| 36857 | Mir450b   | 0.0000 | No |
| 36858 | Mir451a   | 0.0000 | No |
| 36859 | Mir451b   | 0.0000 | No |
| 36860 | Mir452    | 0.0000 | No |
| 36861 | Mir453    | 0.0000 | No |
| 36862 | Mir455    | 0.0000 | No |
| 36863 | Mir463    | 0.0000 | No |
| 36864 | Mir465    | 0.0000 | No |
| 36865 | Mir465b-1 | 0.0000 | No |
| 36866 | Mir465b-2 | 0.0000 | No |
| 36867 | Mir465c-1 | 0.0000 | No |
| 36868 | Mir465c-2 | 0.0000 | No |
| 36869 | Mir465d   | 0.0000 | No |
| 36870 | Mir466    | 0.0000 | No |
| 36871 | Mir466b-1 | 0.0000 | No |
| 36872 | Mir466b-2 | 0.0000 | No |
| 36873 | Mir466b-3 | 0.0000 | No |
| 36874 | Mir466b-4 | 0.0000 | No |
| 36875 | Mir466b-5 | 0.0000 | No |
| 36876 | Mir466b-6 | 0.0000 | No |
| 36877 | Mir466b-7 | 0.0000 | No |
| 36878 | Mir466b-8 | 0.0000 | No |
| 36879 | Mir466c-1 | 0.0000 | No |
| 36880 | Mir466c-2 | 0.0000 | No |
| 36881 | Mir466d   | 0.0000 | No |
| 36882 | Mir466e   | 0.0000 | No |
| 36883 | Mir466f-1 | 0.0000 | No |
| 36884 | Mir466f-2 | 0.0000 | No |
| 36885 | Mir466f-3 | 0.0000 | No |
| 36886 | Mir466g   | 0.0000 | No |
| 36887 | Mir466h   | 0.0000 | No |
| 36888 | Mir466i   | 0.0000 | No |
| 36889 | Mir466j   | 0.0000 | No |

|       |            |        |    |
|-------|------------|--------|----|
| 36890 | Mir466k    | 0.0000 | No |
| 36891 | Mir466l    | 0.0000 | No |
| 36892 | Mir466m    | 0.0000 | No |
| 36893 | Mir466n    | 0.0000 | No |
| 36894 | Mir466o    | 0.0000 | No |
| 36895 | Mir466p    | 0.0000 | No |
| 36896 | Mir466q    | 0.0000 | No |
| 36897 | Mir467a-1  | 0.0000 | No |
| 36898 | Mir467a-10 | 0.0000 | No |
| 36899 | Mir467a-2  | 0.0000 | No |
| 36900 | Mir467a-3  | 0.0000 | No |
| 36901 | Mir467a-4  | 0.0000 | No |
| 36902 | Mir467a-5  | 0.0000 | No |
| 36903 | Mir467a-6  | 0.0000 | No |
| 36904 | Mir467a-7  | 0.0000 | No |
| 36905 | Mir467a-8  | 0.0000 | No |
| 36906 | Mir467a-9  | 0.0000 | No |
| 36907 | Mir467b    | 0.0000 | No |
| 36908 | Mir467c    | 0.0000 | No |
| 36909 | Mir467d    | 0.0000 | No |
| 36910 | Mir467e    | 0.0000 | No |
| 36911 | Mir467f    | 0.0000 | No |
| 36912 | Mir467h    | 0.0000 | No |
| 36913 | Mir468     | 0.0000 | No |
| 36914 | Mir470     | 0.0000 | No |
| 36915 | Mir471     | 0.0000 | No |
| 36916 | Mir483     | 0.0000 | No |
| 36917 | Mir485     | 0.0000 | No |
| 36918 | Mir486     | 0.0000 | No |
| 36919 | Mir487b    | 0.0000 | No |
| 36920 | Mir488     | 0.0000 | No |
| 36921 | Mir489     | 0.0000 | No |
| 36922 | Mir490     | 0.0000 | No |
| 36923 | Mir491     | 0.0000 | No |
| 36924 | Mir493     | 0.0000 | No |
| 36925 | Mir494     | 0.0000 | No |
| 36926 | Mir495     | 0.0000 | No |
| 36927 | Mir496a    | 0.0000 | No |
| 36928 | Mir497     | 0.0000 | No |
| 36929 | Mir497b    | 0.0000 | No |
| 36930 | Mir499     | 0.0000 | No |
| 36931 | Mir500     | 0.0000 | No |
| 36932 | Mir501     | 0.0000 | No |
| 36933 | Mir503     | 0.0000 | No |
| 36934 | Mir504     | 0.0000 | No |
| 36935 | Mir5046    | 0.0000 | No |

|       |          |        |    |
|-------|----------|--------|----|
| 36936 | Mir505   | 0.0000 | No |
| 36937 | Mir509   | 0.0000 | No |
| 36938 | Mir5098  | 0.0000 | No |
| 36939 | Mir5099  | 0.0000 | No |
| 36940 | Mir5100  | 0.0000 | No |
| 36941 | Mir5101  | 0.0000 | No |
| 36942 | Mir5103  | 0.0000 | No |
| 36943 | Mir5104  | 0.0000 | No |
| 36944 | Mir5106  | 0.0000 | No |
| 36945 | Mir5107  | 0.0000 | No |
| 36946 | Mir5108  | 0.0000 | No |
| 36947 | Mir511   | 0.0000 | No |
| 36948 | Mir5110  | 0.0000 | No |
| 36949 | Mir5112  | 0.0000 | No |
| 36950 | Mir5113  | 0.0000 | No |
| 36951 | Mir5114  | 0.0000 | No |
| 36952 | Mir5116  | 0.0000 | No |
| 36953 | Mir5117  | 0.0000 | No |
| 36954 | Mir5118  | 0.0000 | No |
| 36955 | Mir5119  | 0.0000 | No |
| 36956 | Mir5120  | 0.0000 | No |
| 36957 | Mir5121  | 0.0000 | No |
| 36958 | Mir5122  | 0.0000 | No |
| 36959 | Mir5123  | 0.0000 | No |
| 36960 | Mir5124a | 0.0000 | No |
| 36961 | Mir5124b | 0.0000 | No |
| 36962 | Mir5125  | 0.0000 | No |
| 36963 | Mir5126  | 0.0000 | No |
| 36964 | Mir5127  | 0.0000 | No |
| 36965 | Mir5128  | 0.0000 | No |
| 36966 | Mir5129  | 0.0000 | No |
| 36967 | Mir5130  | 0.0000 | No |
| 36968 | Mir5131  | 0.0000 | No |
| 36969 | Mir5132  | 0.0000 | No |
| 36970 | Mir5133  | 0.0000 | No |
| 36971 | Mir5134  | 0.0000 | No |
| 36972 | Mir5135  | 0.0000 | No |
| 36973 | Mir5136  | 0.0000 | No |
| 36974 | Mir532   | 0.0000 | No |
| 36975 | Mir539   | 0.0000 | No |
| 36976 | Mir540   | 0.0000 | No |
| 36977 | Mir541   | 0.0000 | No |
| 36978 | Mir542   | 0.0000 | No |
| 36979 | Mir543   | 0.0000 | No |
| 36980 | Mir544   | 0.0000 | No |
| 36981 | Mir546   | 0.0000 | No |

|       |           |        |    |
|-------|-----------|--------|----|
| 36982 | Mir547    | 0.0000 | No |
| 36983 | Mir551b   | 0.0000 | No |
| 36984 | Mir5615-1 | 0.0000 | No |
| 36985 | Mir5615-2 | 0.0000 | No |
| 36986 | Mir5617   | 0.0000 | No |
| 36987 | Mir5618   | 0.0000 | No |
| 36988 | Mir5620   | 0.0000 | No |
| 36989 | Mir5622   | 0.0000 | No |
| 36990 | Mir5623   | 0.0000 | No |
| 36991 | Mir5624   | 0.0000 | No |
| 36992 | Mir5625   | 0.0000 | No |
| 36993 | Mir5626   | 0.0000 | No |
| 36994 | Mir5627   | 0.0000 | No |
| 36995 | Mir568    | 0.0000 | No |
| 36996 | Mir5709   | 0.0000 | No |
| 36997 | Mir5710   | 0.0000 | No |
| 36998 | Mir574    | 0.0000 | No |
| 36999 | Mir592    | 0.0000 | No |
| 37000 | Mir598    | 0.0000 | No |
| 37001 | Mir599    | 0.0000 | No |
| 37002 | Mir615    | 0.0000 | No |
| 37003 | Mir6236   | 0.0000 | No |
| 37004 | Mir6237   | 0.0000 | No |
| 37005 | Mir6238   | 0.0000 | No |
| 37006 | Mir6239   | 0.0000 | No |
| 37007 | Mir6244   | 0.0000 | No |
| 37008 | Mir6335   | 0.0000 | No |
| 37009 | Mir6336   | 0.0000 | No |
| 37010 | Mir6337   | 0.0000 | No |
| 37011 | Mir6338   | 0.0000 | No |
| 37012 | Mir6339   | 0.0000 | No |
| 37013 | Mir6340   | 0.0000 | No |
| 37014 | Mir6341   | 0.0000 | No |
| 37015 | Mir6343   | 0.0000 | No |
| 37016 | Mir6344   | 0.0000 | No |
| 37017 | Mir6345   | 0.0000 | No |
| 37018 | Mir6346   | 0.0000 | No |
| 37019 | Mir6347   | 0.0000 | No |
| 37020 | Mir6348   | 0.0000 | No |
| 37021 | Mir6349   | 0.0000 | No |
| 37022 | Mir6350   | 0.0000 | No |
| 37023 | Mir6351   | 0.0000 | No |
| 37024 | Mir6352   | 0.0000 | No |
| 37025 | Mir6353   | 0.0000 | No |
| 37026 | Mir6355   | 0.0000 | No |
| 37027 | Mir6356   | 0.0000 | No |

|       |         |        |    |
|-------|---------|--------|----|
| 37028 | Mir6357 | 0.0000 | No |
| 37029 | Mir6358 | 0.0000 | No |
| 37030 | Mir6359 | 0.0000 | No |
| 37031 | Mir6360 | 0.0000 | No |
| 37032 | Mir6363 | 0.0000 | No |
| 37033 | Mir6364 | 0.0000 | No |
| 37034 | Mir6365 | 0.0000 | No |
| 37035 | Mir6366 | 0.0000 | No |
| 37036 | Mir6367 | 0.0000 | No |
| 37037 | Mir6368 | 0.0000 | No |
| 37038 | Mir6369 | 0.0000 | No |
| 37039 | Mir6370 | 0.0000 | No |
| 37040 | Mir6371 | 0.0000 | No |
| 37041 | Mir6373 | 0.0000 | No |
| 37042 | Mir6374 | 0.0000 | No |
| 37043 | Mir6375 | 0.0000 | No |
| 37044 | Mir6376 | 0.0000 | No |
| 37045 | Mir6377 | 0.0000 | No |
| 37046 | Mir6378 | 0.0000 | No |
| 37047 | Mir6379 | 0.0000 | No |
| 37048 | Mir6380 | 0.0000 | No |
| 37049 | Mir6382 | 0.0000 | No |
| 37050 | Mir6383 | 0.0000 | No |
| 37051 | Mir6384 | 0.0000 | No |
| 37052 | Mir6385 | 0.0000 | No |
| 37053 | Mir6386 | 0.0000 | No |
| 37054 | Mir6387 | 0.0000 | No |
| 37055 | Mir6388 | 0.0000 | No |
| 37056 | Mir6390 | 0.0000 | No |
| 37057 | Mir6391 | 0.0000 | No |
| 37058 | Mir6392 | 0.0000 | No |
| 37059 | Mir6393 | 0.0000 | No |
| 37060 | Mir6394 | 0.0000 | No |
| 37061 | Mir6395 | 0.0000 | No |
| 37062 | Mir6396 | 0.0000 | No |
| 37063 | Mir6397 | 0.0000 | No |
| 37064 | Mir6399 | 0.0000 | No |
| 37065 | Mir6401 | 0.0000 | No |
| 37066 | Mir6402 | 0.0000 | No |
| 37067 | Mir6403 | 0.0000 | No |
| 37068 | Mir6404 | 0.0000 | No |
| 37069 | Mir6405 | 0.0000 | No |
| 37070 | Mir6406 | 0.0000 | No |
| 37071 | Mir6407 | 0.0000 | No |
| 37072 | Mir6408 | 0.0000 | No |
| 37073 | Mir6409 | 0.0000 | No |

|       |            |        |    |
|-------|------------|--------|----|
| 37074 | Mir6410    | 0.0000 | No |
| 37075 | Mir6411    | 0.0000 | No |
| 37076 | Mir6413    | 0.0000 | No |
| 37077 | Mir6414    | 0.0000 | No |
| 37078 | Mir6415    | 0.0000 | No |
| 37079 | Mir6416    | 0.0000 | No |
| 37080 | Mir6417    | 0.0000 | No |
| 37081 | Mir6418    | 0.0000 | No |
| 37082 | Mir6419    | 0.0000 | No |
| 37083 | Mir6420    | 0.0000 | No |
| 37084 | Mir6481    | 0.0000 | No |
| 37085 | Mir6516    | 0.0000 | No |
| 37086 | Mir653     | 0.0000 | No |
| 37087 | Mir6537    | 0.0000 | No |
| 37088 | Mir6539    | 0.0000 | No |
| 37089 | Mir654     | 0.0000 | No |
| 37090 | Mir6540    | 0.0000 | No |
| 37091 | Mir6541    | 0.0000 | No |
| 37092 | Mir6546    | 0.0000 | No |
| 37093 | Mir664     | 0.0000 | No |
| 37094 | Mir665     | 0.0000 | No |
| 37095 | Mir666     | 0.0000 | No |
| 37096 | Mir667     | 0.0000 | No |
| 37097 | Mir668     | 0.0000 | No |
| 37098 | Mir669a-1  | 0.0000 | No |
| 37099 | Mir669a-10 | 0.0000 | No |
| 37100 | Mir669a-11 | 0.0000 | No |
| 37101 | Mir669a-12 | 0.0000 | No |
| 37102 | Mir669a-3  | 0.0000 | No |
| 37103 | Mir669a-4  | 0.0000 | No |
| 37104 | Mir669a-5  | 0.0000 | No |
| 37105 | Mir669a-6  | 0.0000 | No |
| 37106 | Mir669a-7  | 0.0000 | No |
| 37107 | Mir669a-8  | 0.0000 | No |
| 37108 | Mir669a-9  | 0.0000 | No |
| 37109 | Mir669c    | 0.0000 | No |
| 37110 | Mir669d    | 0.0000 | No |
| 37111 | Mir669d-2  | 0.0000 | No |
| 37112 | Mir669e    | 0.0000 | No |
| 37113 | Mir669f    | 0.0000 | No |
| 37114 | Mir669g    | 0.0000 | No |
| 37115 | Mir669h    | 0.0000 | No |
| 37116 | Mir669j    | 0.0000 | No |
| 37117 | Mir669k    | 0.0000 | No |
| 37118 | Mir669m-1  | 0.0000 | No |
| 37119 | Mir669m-2  | 0.0000 | No |

|       |           |        |    |
|-------|-----------|--------|----|
| 37120 | Mir669n   | 0.0000 | No |
| 37121 | Mir669o   | 0.0000 | No |
| 37122 | Mir669p-1 | 0.0000 | No |
| 37123 | Mir669p-2 | 0.0000 | No |
| 37124 | Mir670    | 0.0000 | No |
| 37125 | Mir670hg  | 0.0000 | No |
| 37126 | Mir671    | 0.0000 | No |
| 37127 | Mir6715   | 0.0000 | No |
| 37128 | Mir672    | 0.0000 | No |
| 37129 | Mir673    | 0.0000 | No |
| 37130 | Mir675    | 0.0000 | No |
| 37131 | Mir676    | 0.0000 | No |
| 37132 | Mir6769b  | 0.0000 | No |
| 37133 | Mir677    | 0.0000 | No |
| 37134 | Mir678    | 0.0000 | No |
| 37135 | Mir680-1  | 0.0000 | No |
| 37136 | Mir680-2  | 0.0000 | No |
| 37137 | Mir680-3  | 0.0000 | No |
| 37138 | Mir681    | 0.0000 | No |
| 37139 | Mir682    | 0.0000 | No |
| 37140 | Mir683-1  | 0.0000 | No |
| 37141 | Mir683-2  | 0.0000 | No |
| 37142 | Mir684-1  | 0.0000 | No |
| 37143 | Mir686    | 0.0000 | No |
| 37144 | Mir687    | 0.0000 | No |
| 37145 | Mir688    | 0.0000 | No |
| 37146 | Mir6896   | 0.0000 | No |
| 37147 | Mir6897   | 0.0000 | No |
| 37148 | Mir6898   | 0.0000 | No |
| 37149 | Mir6899   | 0.0000 | No |
| 37150 | Mir690    | 0.0000 | No |
| 37151 | Mir6900   | 0.0000 | No |
| 37152 | Mir6901   | 0.0000 | No |
| 37153 | Mir6902   | 0.0000 | No |
| 37154 | Mir6903   | 0.0000 | No |
| 37155 | Mir6905   | 0.0000 | No |
| 37156 | Mir6906   | 0.0000 | No |
| 37157 | Mir6907   | 0.0000 | No |
| 37158 | Mir6908   | 0.0000 | No |
| 37159 | Mir6909   | 0.0000 | No |
| 37160 | Mir691    | 0.0000 | No |
| 37161 | Mir6910   | 0.0000 | No |
| 37162 | Mir6911   | 0.0000 | No |
| 37163 | Mir6912   | 0.0000 | No |
| 37164 | Mir6913   | 0.0000 | No |
| 37165 | Mir6914   | 0.0000 | No |



|       |          |        |    |
|-------|----------|--------|----|
| 37166 | Mir6915  | 0.0000 | No |
| 37167 | Mir6917  | 0.0000 | No |
| 37168 | Mir6918  | 0.0000 | No |
| 37169 | Mir6919  | 0.0000 | No |
| 37170 | Mir692-1 | 0.0000 | No |
| 37171 | Mir6922  | 0.0000 | No |
| 37172 | Mir692-2 | 0.0000 | No |
| 37173 | Mir6923  | 0.0000 | No |
| 37174 | Mir692-3 | 0.0000 | No |
| 37175 | Mir6924  | 0.0000 | No |
| 37176 | Mir6925  | 0.0000 | No |
| 37177 | Mir6926  | 0.0000 | No |
| 37178 | Mir6927  | 0.0000 | No |
| 37179 | Mir6928  | 0.0000 | No |
| 37180 | Mir6930  | 0.0000 | No |
| 37181 | Mir6933  | 0.0000 | No |
| 37182 | Mir6934  | 0.0000 | No |
| 37183 | Mir6935  | 0.0000 | No |
| 37184 | Mir6936  | 0.0000 | No |
| 37185 | Mir6937  | 0.0000 | No |
| 37186 | Mir6938  | 0.0000 | No |
| 37187 | Mir694   | 0.0000 | No |
| 37188 | Mir6940  | 0.0000 | No |
| 37189 | Mir6941  | 0.0000 | No |
| 37190 | Mir6942  | 0.0000 | No |
| 37191 | Mir6943  | 0.0000 | No |
| 37192 | Mir6944  | 0.0000 | No |
| 37193 | Mir6945  | 0.0000 | No |
| 37194 | Mir6946  | 0.0000 | No |
| 37195 | Mir6948  | 0.0000 | No |
| 37196 | Mir6949  | 0.0000 | No |
| 37197 | Mir6950  | 0.0000 | No |
| 37198 | Mir6951  | 0.0000 | No |
| 37199 | Mir6952  | 0.0000 | No |
| 37200 | Mir6953  | 0.0000 | No |
| 37201 | Mir6954  | 0.0000 | No |
| 37202 | Mir6955  | 0.0000 | No |
| 37203 | Mir6956  | 0.0000 | No |
| 37204 | Mir6957  | 0.0000 | No |
| 37205 | Mir6958  | 0.0000 | No |
| 37206 | Mir6960  | 0.0000 | No |
| 37207 | Mir6961  | 0.0000 | No |
| 37208 | Mir6963  | 0.0000 | No |
| 37209 | Mir6965  | 0.0000 | No |
| 37210 | Mir6966  | 0.0000 | No |
| 37211 | Mir6968  | 0.0000 | No |

|       |          |        |    |
|-------|----------|--------|----|
| 37212 | Mir6969  | 0.0000 | No |
| 37213 | Mir697   | 0.0000 | No |
| 37214 | Mir6970  | 0.0000 | No |
| 37215 | Mir6971  | 0.0000 | No |
| 37216 | Mir6973a | 0.0000 | No |
| 37217 | Mir6973b | 0.0000 | No |
| 37218 | Mir6976  | 0.0000 | No |
| 37219 | Mir6977  | 0.0000 | No |
| 37220 | Mir6978  | 0.0000 | No |
| 37221 | Mir6979  | 0.0000 | No |
| 37222 | Mir698   | 0.0000 | No |
| 37223 | Mir6980  | 0.0000 | No |
| 37224 | Mir6981  | 0.0000 | No |
| 37225 | Mir6982  | 0.0000 | No |
| 37226 | Mir6983  | 0.0000 | No |
| 37227 | Mir6986  | 0.0000 | No |
| 37228 | Mir6987  | 0.0000 | No |
| 37229 | Mir6988  | 0.0000 | No |
| 37230 | Mir6989  | 0.0000 | No |
| 37231 | Mir6990  | 0.0000 | No |
| 37232 | Mir6991  | 0.0000 | No |
| 37233 | Mir6992  | 0.0000 | No |
| 37234 | Mir6993  | 0.0000 | No |
| 37235 | Mir6994  | 0.0000 | No |
| 37236 | Mir6996  | 0.0000 | No |
| 37237 | Mir6998  | 0.0000 | No |
| 37238 | Mir6999  | 0.0000 | No |
| 37239 | Mir700   | 0.0000 | No |
| 37240 | Mir7000  | 0.0000 | No |
| 37241 | Mir7001  | 0.0000 | No |
| 37242 | Mir7004  | 0.0000 | No |
| 37243 | Mir7005  | 0.0000 | No |
| 37244 | Mir7006  | 0.0000 | No |
| 37245 | Mir7008  | 0.0000 | No |
| 37246 | Mir7009  | 0.0000 | No |
| 37247 | Mir701   | 0.0000 | No |
| 37248 | Mir7010  | 0.0000 | No |
| 37249 | Mir7011  | 0.0000 | No |
| 37250 | Mir7013  | 0.0000 | No |
| 37251 | Mir7014  | 0.0000 | No |
| 37252 | Mir7015  | 0.0000 | No |
| 37253 | Mir7016  | 0.0000 | No |
| 37254 | Mir7017  | 0.0000 | No |
| 37255 | Mir7018  | 0.0000 | No |
| 37256 | Mir7019  | 0.0000 | No |
| 37257 | Mir702   | 0.0000 | No |

|       |          |        |    |
|-------|----------|--------|----|
| 37258 | Mir7020  | 0.0000 | No |
| 37259 | Mir7021  | 0.0000 | No |
| 37260 | Mir7022  | 0.0000 | No |
| 37261 | Mir7023  | 0.0000 | No |
| 37262 | Mir7024  | 0.0000 | No |
| 37263 | Mir7026  | 0.0000 | No |
| 37264 | Mir7028  | 0.0000 | No |
| 37265 | Mir703   | 0.0000 | No |
| 37266 | Mir7030  | 0.0000 | No |
| 37267 | Mir7031  | 0.0000 | No |
| 37268 | Mir7032  | 0.0000 | No |
| 37269 | Mir7033  | 0.0000 | No |
| 37270 | Mir7034  | 0.0000 | No |
| 37271 | Mir7035  | 0.0000 | No |
| 37272 | Mir7036  | 0.0000 | No |
| 37273 | Mir7036b | 0.0000 | No |
| 37274 | Mir7037  | 0.0000 | No |
| 37275 | Mir7038  | 0.0000 | No |
| 37276 | Mir7039  | 0.0000 | No |
| 37277 | Mir704   | 0.0000 | No |
| 37278 | Mir7040  | 0.0000 | No |
| 37279 | Mir7041  | 0.0000 | No |
| 37280 | Mir7042  | 0.0000 | No |
| 37281 | Mir7043  | 0.0000 | No |
| 37282 | Mir7044  | 0.0000 | No |
| 37283 | Mir7045  | 0.0000 | No |
| 37284 | Mir7046  | 0.0000 | No |
| 37285 | Mir7047  | 0.0000 | No |
| 37286 | Mir7048  | 0.0000 | No |
| 37287 | Mir7049  | 0.0000 | No |
| 37288 | Mir705   | 0.0000 | No |
| 37289 | Mir7050  | 0.0000 | No |
| 37290 | Mir7051  | 0.0000 | No |
| 37291 | Mir7052  | 0.0000 | No |
| 37292 | Mir7053  | 0.0000 | No |
| 37293 | Mir7054  | 0.0000 | No |
| 37294 | Mir7055  | 0.0000 | No |
| 37295 | Mir7056  | 0.0000 | No |
| 37296 | Mir7057  | 0.0000 | No |
| 37297 | Mir7058  | 0.0000 | No |
| 37298 | Mir7059  | 0.0000 | No |
| 37299 | Mir706   | 0.0000 | No |
| 37300 | Mir7060  | 0.0000 | No |
| 37301 | Mir7061  | 0.0000 | No |
| 37302 | Mir7062  | 0.0000 | No |
| 37303 | Mir7063  | 0.0000 | No |

|       |           |        |    |
|-------|-----------|--------|----|
| 37304 | Mir7064   | 0.0000 | No |
| 37305 | Mir7065   | 0.0000 | No |
| 37306 | Mir7066   | 0.0000 | No |
| 37307 | Mir7067   | 0.0000 | No |
| 37308 | Mir7068   | 0.0000 | No |
| 37309 | Mir7069   | 0.0000 | No |
| 37310 | Mir707    | 0.0000 | No |
| 37311 | Mir7070   | 0.0000 | No |
| 37312 | Mir7071   | 0.0000 | No |
| 37313 | Mir7072   | 0.0000 | No |
| 37314 | Mir7073   | 0.0000 | No |
| 37315 | Mir7074   | 0.0000 | No |
| 37316 | Mir7075   | 0.0000 | No |
| 37317 | Mir7076   | 0.0000 | No |
| 37318 | Mir7078   | 0.0000 | No |
| 37319 | Mir7079   | 0.0000 | No |
| 37320 | Mir708    | 0.0000 | No |
| 37321 | Mir7080   | 0.0000 | No |
| 37322 | Mir7081   | 0.0000 | No |
| 37323 | Mir7082   | 0.0000 | No |
| 37324 | Mir7083   | 0.0000 | No |
| 37325 | Mir7084   | 0.0000 | No |
| 37326 | Mir7087   | 0.0000 | No |
| 37327 | Mir7088   | 0.0000 | No |
| 37328 | Mir7089   | 0.0000 | No |
| 37329 | Mir709    | 0.0000 | No |
| 37330 | Mir7090   | 0.0000 | No |
| 37331 | Mir7091   | 0.0000 | No |
| 37332 | Mir7092   | 0.0000 | No |
| 37333 | Mir7093   | 0.0000 | No |
| 37334 | Mir7094-1 | 0.0000 | No |
| 37335 | Mir7094-2 | 0.0000 | No |
| 37336 | Mir7-1    | 0.0000 | No |
| 37337 | Mir710    | 0.0000 | No |
| 37338 | Mir711    | 0.0000 | No |
| 37339 | Mir7115   | 0.0000 | No |
| 37340 | Mir7117   | 0.0000 | No |
| 37341 | Mir7118   | 0.0000 | No |
| 37342 | Mir7119   | 0.0000 | No |
| 37343 | Mir713    | 0.0000 | No |
| 37344 | Mir717    | 0.0000 | No |
| 37345 | Mir718    | 0.0000 | No |
| 37346 | Mir719    | 0.0000 | No |
| 37347 | Mir7-2    | 0.0000 | No |
| 37348 | Mir721    | 0.0000 | No |
| 37349 | Mir7210   | 0.0000 | No |

|       |         |        |    |
|-------|---------|--------|----|
| 37350 | Mir7211 | 0.0000 | No |
| 37351 | Mir7212 | 0.0000 | No |
| 37352 | Mir7213 | 0.0000 | No |
| 37353 | Mir7214 | 0.0000 | No |
| 37354 | Mir7215 | 0.0000 | No |
| 37355 | Mir7216 | 0.0000 | No |
| 37356 | Mir7217 | 0.0000 | No |
| 37357 | Mir7218 | 0.0000 | No |
| 37358 | Mir7219 | 0.0000 | No |
| 37359 | Mir7220 | 0.0000 | No |
| 37360 | Mir7221 | 0.0000 | No |
| 37361 | Mir7222 | 0.0000 | No |
| 37362 | Mir7223 | 0.0000 | No |
| 37363 | Mir7224 | 0.0000 | No |
| 37364 | Mir7225 | 0.0000 | No |
| 37365 | Mir7226 | 0.0000 | No |
| 37366 | Mir7227 | 0.0000 | No |
| 37367 | Mir7228 | 0.0000 | No |
| 37368 | Mir7229 | 0.0000 | No |
| 37369 | Mir7230 | 0.0000 | No |
| 37370 | Mir7231 | 0.0000 | No |
| 37371 | Mir7232 | 0.0000 | No |
| 37372 | Mir7233 | 0.0000 | No |
| 37373 | Mir7234 | 0.0000 | No |
| 37374 | Mir7235 | 0.0000 | No |
| 37375 | Mir7236 | 0.0000 | No |
| 37376 | Mir7237 | 0.0000 | No |
| 37377 | Mir7238 | 0.0000 | No |
| 37378 | Mir7239 | 0.0000 | No |
| 37379 | Mir7240 | 0.0000 | No |
| 37380 | Mir7241 | 0.0000 | No |
| 37381 | Mir7242 | 0.0000 | No |
| 37382 | Mir7243 | 0.0000 | No |
| 37383 | Mir741  | 0.0000 | No |
| 37384 | Mir742  | 0.0000 | No |
| 37385 | Mir743  | 0.0000 | No |
| 37386 | Mir743b | 0.0000 | No |
| 37387 | Mir7578 | 0.0000 | No |
| 37388 | Mir758  | 0.0000 | No |
| 37389 | Mir759  | 0.0000 | No |
| 37390 | Mir760  | 0.0000 | No |
| 37391 | Mir761  | 0.0000 | No |
| 37392 | Mir762  | 0.0000 | No |
| 37393 | Mir764  | 0.0000 | No |
| 37394 | Mir7646 | 0.0000 | No |
| 37395 | Mir7647 | 0.0000 | No |

|       |           |        |    |
|-------|-----------|--------|----|
| 37396 | Mir7648   | 0.0000 | No |
| 37397 | Mir7649   | 0.0000 | No |
| 37398 | Mir7650   | 0.0000 | No |
| 37399 | Mir7651   | 0.0000 | No |
| 37400 | Mir7652   | 0.0000 | No |
| 37401 | Mir7653   | 0.0000 | No |
| 37402 | Mir7654   | 0.0000 | No |
| 37403 | Mir7655   | 0.0000 | No |
| 37404 | Mir7657   | 0.0000 | No |
| 37405 | Mir7658   | 0.0000 | No |
| 37406 | Mir7659   | 0.0000 | No |
| 37407 | Mir7660   | 0.0000 | No |
| 37408 | Mir7662   | 0.0000 | No |
| 37409 | Mir7663   | 0.0000 | No |
| 37410 | Mir7664   | 0.0000 | No |
| 37411 | Mir7665   | 0.0000 | No |
| 37412 | Mir7666   | 0.0000 | No |
| 37413 | Mir7667   | 0.0000 | No |
| 37414 | Mir7668   | 0.0000 | No |
| 37415 | Mir7669   | 0.0000 | No |
| 37416 | Mir767    | 0.0000 | No |
| 37417 | Mir7670   | 0.0000 | No |
| 37418 | Mir7671   | 0.0000 | No |
| 37419 | Mir7672   | 0.0000 | No |
| 37420 | Mir7673   | 0.0000 | No |
| 37421 | Mir7674   | 0.0000 | No |
| 37422 | Mir7675   | 0.0000 | No |
| 37423 | Mir7676-1 | 0.0000 | No |
| 37424 | Mir7676-2 | 0.0000 | No |
| 37425 | Mir7677   | 0.0000 | No |
| 37426 | Mir7679   | 0.0000 | No |
| 37427 | Mir7681   | 0.0000 | No |
| 37428 | Mir7682   | 0.0000 | No |
| 37429 | Mir7684   | 0.0000 | No |
| 37430 | Mir7685   | 0.0000 | No |
| 37431 | Mir7686   | 0.0000 | No |
| 37432 | Mir7689   | 0.0000 | No |
| 37433 | Mir770    | 0.0000 | No |
| 37434 | Mir7b     | 0.0000 | No |
| 37435 | Mir7j     | 0.0000 | No |
| 37436 | Mir7k     | 0.0000 | No |
| 37437 | Mir802    | 0.0000 | No |
| 37438 | Mir804    | 0.0000 | No |
| 37439 | Mir8092   | 0.0000 | No |
| 37440 | Mir8093   | 0.0000 | No |
| 37441 | Mir8094   | 0.0000 | No |

|       |           |        |    |
|-------|-----------|--------|----|
| 37442 | Mir8096   | 0.0000 | No |
| 37443 | Mir8097   | 0.0000 | No |
| 37444 | Mir8098   | 0.0000 | No |
| 37445 | Mir8099-1 | 0.0000 | No |
| 37446 | Mir8099-2 | 0.0000 | No |
| 37447 | Mir8100   | 0.0000 | No |
| 37448 | Mir8101   | 0.0000 | No |
| 37449 | Mir8102   | 0.0000 | No |
| 37450 | Mir8104   | 0.0000 | No |
| 37451 | Mir8105   | 0.0000 | No |
| 37452 | Mir8106   | 0.0000 | No |
| 37453 | Mir8107   | 0.0000 | No |
| 37454 | Mir8108   | 0.0000 | No |
| 37455 | Mir8109   | 0.0000 | No |
| 37456 | Mir8112   | 0.0000 | No |
| 37457 | Mir8113   | 0.0000 | No |
| 37458 | Mir8114   | 0.0000 | No |
| 37459 | Mir8115   | 0.0000 | No |
| 37460 | Mir8116   | 0.0000 | No |
| 37461 | Mir8118   | 0.0000 | No |
| 37462 | Mir8119   | 0.0000 | No |
| 37463 | Mir8120   | 0.0000 | No |
| 37464 | Mir872    | 0.0000 | No |
| 37465 | Mir873a   | 0.0000 | No |
| 37466 | Mir873b   | 0.0000 | No |
| 37467 | Mir874    | 0.0000 | No |
| 37468 | Mir875    | 0.0000 | No |
| 37469 | Mir876    | 0.0000 | No |
| 37470 | Mir878    | 0.0000 | No |
| 37471 | Mir879    | 0.0000 | No |
| 37472 | Mir880    | 0.0000 | No |
| 37473 | Mir881    | 0.0000 | No |
| 37474 | Mir882    | 0.0000 | No |
| 37475 | Mir883a   | 0.0000 | No |
| 37476 | Mir883b   | 0.0000 | No |
| 37477 | Mir9-1    | 0.0000 | No |
| 37478 | Mir9-2    | 0.0000 | No |
| 37479 | Mir92-1   | 0.0000 | No |
| 37480 | Mir92b    | 0.0000 | No |
| 37481 | Mir93     | 0.0000 | No |
| 37482 | Mir9-3    | 0.0000 | No |
| 37483 | Mir9-3hg  | 0.0000 | No |
| 37484 | Mir96     | 0.0000 | No |
| 37485 | Mir98     | 0.0000 | No |
| 37486 | Mir99a    | 0.0000 | No |
| 37487 | Mir99ahg  | 0.0000 | No |

|       |            |        |    |
|-------|------------|--------|----|
| 37488 | Mir99b     | 0.0000 | No |
| 37489 | Mirg       | 0.0000 | No |
| 37490 | Mirlet7a-1 | 0.0000 | No |
| 37491 | Mirlet7a-2 | 0.0000 | No |
| 37492 | Mirlet7b   | 0.0000 | No |
| 37493 | Mirlet7c-1 | 0.0000 | No |
| 37494 | Mirlet7c-2 | 0.0000 | No |
| 37495 | Mirlet7d   | 0.0000 | No |
| 37496 | Mirlet7e   | 0.0000 | No |
| 37497 | Mirlet7f-1 | 0.0000 | No |
| 37498 | Mirlet7f-2 | 0.0000 | No |
| 37499 | Mirlet7g   | 0.0000 | No |
| 37500 | Mirlet7i   | 0.0000 | No |
| 37501 | Mirt1      | 0.0000 | No |
| 37502 | Mirt2      | 0.0000 | No |
| 37503 | Mis12      | 0.0000 | No |
| 37504 | Mis18a     | 0.0000 | No |
| 37505 | Mis18bp1   | 0.0000 | No |
| 37506 | Misp       | 0.0000 | No |
| 37507 | Mitf       | 0.0000 | No |
| 37508 | Mixl1      | 0.0000 | No |
| 37509 | Mki67      | 0.0000 | No |
| 37510 | Mkks       | 0.0000 | No |
| 37511 | Mkl1       | 0.0000 | No |
| 37512 | Mkl2       | 0.0000 | No |
| 37513 | Mkln1      | 0.0000 | No |
| 37514 | Mkln1os    | 0.0000 | No |
| 37515 | Mknk1      | 0.0000 | No |
| 37516 | Mknk2      | 0.0000 | No |
| 37517 | Mkrn1      | 0.0000 | No |
| 37518 | Mkrn1-ps1  | 0.0000 | No |
| 37519 | Mkrn2      | 0.0000 | No |
| 37520 | Mkrn2os    | 0.0000 | No |
| 37521 | Mkrn3      | 0.0000 | No |
| 37522 | Mks1       | 0.0000 | No |
| 37523 | Mkx        | 0.0000 | No |
| 37524 | Mlana      | 0.0000 | No |
| 37525 | Mlc1       | 0.0000 | No |
| 37526 | Mlec       | 0.0000 | No |
| 37527 | Mlf1       | 0.0000 | No |
| 37528 | Mlf2       | 0.0000 | No |
| 37529 | Mlh1       | 0.0000 | No |
| 37530 | Mlh3       | 0.0000 | No |
| 37531 | Mlip       | 0.0000 | No |
| 37532 | Mlkl       | 0.0000 | No |
| 37533 | Mllt1      | 0.0000 | No |



|       |                |        |    |
|-------|----------------|--------|----|
| 37534 | Mllt10         | 0.0000 | No |
| 37535 | Mllt11         | 0.0000 | No |
| 37536 | Mllt6          | 0.0000 | No |
| 37537 | Mlnr-ps        | 0.0000 | No |
| 37538 | Mlph           | 0.0000 | No |
| 37539 | Mlst8          | 0.0000 | No |
| 37540 | Mlx            | 0.0000 | No |
| 37541 | Mlxip          | 0.0000 | No |
| 37542 | Mlxipl         | 0.0000 | No |
| 37543 | Mlycd          | 0.0000 | No |
| 37544 | Mmaa           | 0.0000 | No |
| 37545 | Mmab           | 0.0000 | No |
| 37546 | Mmachc         | 0.0000 | No |
| 37547 | Mmadhc         | 0.0000 | No |
| 37548 | Mmd            | 0.0000 | No |
| 37549 | Mmd2           | 0.0000 | No |
| 37550 | Mme            | 0.0000 | No |
| 37551 | Mmel1          | 0.0000 | No |
| 37552 | Mmgt1          | 0.0000 | No |
| 37553 | Mmp10          | 0.0000 | No |
| 37554 | Mmp13          | 0.0000 | No |
| 37555 | Mmp15          | 0.0000 | No |
| 37556 | Mmp16          | 0.0000 | No |
| 37557 | Mmp17          | 0.0000 | No |
| 37558 | Mmp19          | 0.0000 | No |
| 37559 | Mmp1a          | 0.0000 | No |
| 37560 | Mmp1b          | 0.0000 | No |
| 37561 | Mmp2           | 0.0000 | No |
| 37562 | Mmp20          | 0.0000 | No |
| 37563 | Mmp21          | 0.0000 | No |
| 37564 | Mmp23          | 0.0000 | No |
| 37565 | Mmp24          | 0.0000 | No |
| 37566 | Mmp27          | 0.0000 | No |
| 37567 | Mmp28          | 0.0000 | No |
| 37568 | Mmp7           | 0.0000 | No |
| 37569 | Mmp8           | 0.0000 | No |
| 37570 | Mmp9           | 0.0000 | No |
| 37571 | Mms19          | 0.0000 | No |
| 37572 | Mms22l         | 0.0000 | No |
| 37573 | mmu-mir-1188   | 0.0000 | No |
| 37574 | mmu-mir-127    | 0.0000 | No |
| 37575 | mmu-mir-1306   | 0.0000 | No |
| 37576 | mmu-mir-136    | 0.0000 | No |
| 37577 | mmu-mir-147    | 0.0000 | No |
| 37578 | mmu-mir-185    | 0.0000 | No |
| 37579 | mmu-mir-1906-1 | 0.0000 | No |

|       |                |        |    |
|-------|----------------|--------|----|
| 37580 | mmu-mir-192    | 0.0000 | No |
| 37581 | mmu-mir-194-2  | 0.0000 | No |
| 37582 | mmu-mir-290a   | 0.0000 | No |
| 37583 | mmu-mir-290b   | 0.0000 | No |
| 37584 | mmu-mir-291a   | 0.0000 | No |
| 37585 | mmu-mir-291b   | 0.0000 | No |
| 37586 | mmu-mir-292a   | 0.0000 | No |
| 37587 | mmu-mir-292b   | 0.0000 | No |
| 37588 | mmu-mir-293    | 0.0000 | No |
| 37589 | mmu-mir-294    | 0.0000 | No |
| 37590 | mmu-mir-295    | 0.0000 | No |
| 37591 | mmu-mir-3070-1 | 0.0000 | No |
| 37592 | mmu-mir-3070-2 | 0.0000 | No |
| 37593 | mmu-mir-3071   | 0.0000 | No |
| 37594 | mmu-mir-337    | 0.0000 | No |
| 37595 | mmu-mir-341    | 0.0000 | No |
| 37596 | mmu-mir-3473c  | 0.0000 | No |
| 37597 | mmu-mir-3544   | 0.0000 | No |
| 37598 | mmu-mir-3618   | 0.0000 | No |
| 37599 | mmu-mir-370    | 0.0000 | No |
| 37600 | mmu-mir-431    | 0.0000 | No |
| 37601 | mmu-mir-432    | 0.0000 | No |
| 37602 | mmu-mir-433    | 0.0000 | No |
| 37603 | mmu-mir-434    | 0.0000 | No |
| 37604 | mmu-mir-493    | 0.0000 | No |
| 37605 | mmu-mir-505    | 0.0000 | No |
| 37606 | mmu-mir-540    | 0.0000 | No |
| 37607 | mmu-mir-6366   | 0.0000 | No |
| 37608 | mmu-mir-665    | 0.0000 | No |
| 37609 | mmu-mir-673    | 0.0000 | No |
| 37610 | mmu-mir-6989   | 0.0000 | No |
| 37611 | mmu-mir-7240   | 0.0000 | No |
| 37612 | mmu-mir-770    | 0.0000 | No |
| 37613 | mmu-mir-882    | 0.0000 | No |
| 37614 | mmu-mir-935    | 0.0000 | No |
| 37615 | Mn1            | 0.0000 | No |
| 37616 | Mnat1          | 0.0000 | No |
| 37617 | Mnd1           | 0.0000 | No |
| 37618 | Mnd1-ps        | 0.0000 | No |
| 37619 | Mndal          | 0.0000 | No |
| 37620 | Mns1           | 0.0000 | No |
| 37621 | Mnt            | 0.0000 | No |
| 37622 | Mnx1           | 0.0000 | No |
| 37623 | Moap1          | 0.0000 | No |
| 37624 | Mob1a          | 0.0000 | No |
| 37625 | Mob1b          | 0.0000 | No |

|       |           |        |    |
|-------|-----------|--------|----|
| 37626 | Mob2      | 0.0000 | No |
| 37627 | Mob3b     | 0.0000 | No |
| 37628 | Mob4      | 0.0000 | No |
| 37629 | Mobp      | 0.0000 | No |
| 37630 | Mocos     | 0.0000 | No |
| 37631 | Mocs1     | 0.0000 | No |
| 37632 | Mocs2     | 0.0000 | No |
| 37633 | Mocs3     | 0.0000 | No |
| 37634 | Mog       | 0.0000 | No |
| 37635 | Mogat1    | 0.0000 | No |
| 37636 | Mogat2    | 0.0000 | No |
| 37637 | Mogs      | 0.0000 | No |
| 37638 | Mok       | 0.0000 | No |
| 37639 | Mon1a     | 0.0000 | No |
| 37640 | Mon1b     | 0.0000 | No |
| 37641 | Mon2      | 0.0000 | No |
| 37642 | Morc1     | 0.0000 | No |
| 37643 | Morc2a    | 0.0000 | No |
| 37644 | Morc2b    | 0.0000 | No |
| 37645 | Morc3     | 0.0000 | No |
| 37646 | Morc4     | 0.0000 | No |
| 37647 | Morf411   | 0.0000 | No |
| 37648 | Morf412   | 0.0000 | No |
| 37649 | Morn1     | 0.0000 | No |
| 37650 | Morn2     | 0.0000 | No |
| 37651 | Morn3     | 0.0000 | No |
| 37652 | Morn4     | 0.0000 | No |
| 37653 | Morn5     | 0.0000 | No |
| 37654 | Mos       | 0.0000 | No |
| 37655 | Mospd1    | 0.0000 | No |
| 37656 | Mospd2    | 0.0000 | No |
| 37657 | Mospd3    | 0.0000 | No |
| 37658 | Mov10     | 0.0000 | No |
| 37659 | Mov1011   | 0.0000 | No |
| 37660 | Moxd2     | 0.0000 | No |
| 37661 | Mpc1      | 0.0000 | No |
| 37662 | Mpc1-ps   | 0.0000 | No |
| 37663 | Mpc2      | 0.0000 | No |
| 37664 | Mpdu1     | 0.0000 | No |
| 37665 | Mpeg1     | 0.0000 | No |
| 37666 | Mpg       | 0.0000 | No |
| 37667 | Mphosph10 | 0.0000 | No |
| 37668 | Mphosph6  | 0.0000 | No |
| 37669 | Mphosph8  | 0.0000 | No |
| 37670 | Mphosph9  | 0.0000 | No |
| 37671 | Mpi       | 0.0000 | No |

|       |             |        |    |
|-------|-------------|--------|----|
| 37672 | Mpl         | 0.0000 | No |
| 37673 | Mplkip      | 0.0000 | No |
| 37674 | Mpnd        | 0.0000 | No |
| 37675 | Mpo         | 0.0000 | No |
| 37676 | Mpp1        | 0.0000 | No |
| 37677 | Mpp2        | 0.0000 | No |
| 37678 | Mpp3        | 0.0000 | No |
| 37679 | Mpp4        | 0.0000 | No |
| 37680 | Mpp5        | 0.0000 | No |
| 37681 | Mpp6        | 0.0000 | No |
| 37682 | Mpp7        | 0.0000 | No |
| 37683 | Mppe1       | 0.0000 | No |
| 37684 | Mpped1      | 0.0000 | No |
| 37685 | Mprip       | 0.0000 | No |
| 37686 | Mpst        | 0.0000 | No |
| 37687 | Mptx1       | 0.0000 | No |
| 37688 | Mptx2       | 0.0000 | No |
| 37689 | Mpv171      | 0.0000 | No |
| 37690 | Mpv1712     | 0.0000 | No |
| 37691 | Mpz         | 0.0000 | No |
| 37692 | Mpzl1       | 0.0000 | No |
| 37693 | Mpzl2       | 0.0000 | No |
| 37694 | Mpzl3       | 0.0000 | No |
| 37695 | Mr1         | 0.0000 | No |
| 37696 | Mrap        | 0.0000 | No |
| 37697 | Mrap2       | 0.0000 | No |
| 37698 | Mras        | 0.0000 | No |
| 37699 | Mrc1        | 0.0000 | No |
| 37700 | Mrc2        | 0.0000 | No |
| 37701 | Mre11a      | 0.0000 | No |
| 37702 | Mreg        | 0.0000 | No |
| 37703 | Mrfap1      | 0.0000 | No |
| 37704 | Mrgbp       | 0.0000 | No |
| 37705 | Mrgpra1     | 0.0000 | No |
| 37706 | Mrgpra14    | 0.0000 | No |
| 37707 | Mrgpra18-ps | 0.0000 | No |
| 37708 | Mrgpra2a    | 0.0000 | No |
| 37709 | Mrgpra3     | 0.0000 | No |
| 37710 | Mrgpra4     | 0.0000 | No |
| 37711 | Mrgpra6     | 0.0000 | No |
| 37712 | Mrgprb1     | 0.0000 | No |
| 37713 | Mrgprb11-ps | 0.0000 | No |
| 37714 | Mrgprb12-ps | 0.0000 | No |
| 37715 | Mrgprb13    | 0.0000 | No |
| 37716 | Mrgprb2     | 0.0000 | No |
| 37717 | Mrgprb3     | 0.0000 | No |

|       |            |        |    |
|-------|------------|--------|----|
| 37718 | Mrgprb5    | 0.0000 | No |
| 37719 | Mrgprb7-ps | 0.0000 | No |
| 37720 | Mrgprb8    | 0.0000 | No |
| 37721 | Mrgprb9-ps | 0.0000 | No |
| 37722 | Mrgprc1-ps | 0.0000 | No |
| 37723 | Mrgprc2-ps | 0.0000 | No |
| 37724 | Mrgprd     | 0.0000 | No |
| 37725 | Mrgpre     | 0.0000 | No |
| 37726 | Mrgprf     | 0.0000 | No |
| 37727 | Mrgprg     | 0.0000 | No |
| 37728 | Mrgprh     | 0.0000 | No |
| 37729 | Mrgprx1    | 0.0000 | No |
| 37730 | Mrgprx2    | 0.0000 | No |
| 37731 | Mri1       | 0.0000 | No |
| 37732 | Mrip-ps    | 0.0000 | No |
| 37733 | Mrln       | 0.0000 | No |
| 37734 | Mrm1       | 0.0000 | No |
| 37735 | Mrm2       | 0.0000 | No |
| 37736 | Mro        | 0.0000 | No |
| 37737 | Mroh1      | 0.0000 | No |
| 37738 | Mroh2a     | 0.0000 | No |
| 37739 | Mroh2b     | 0.0000 | No |
| 37740 | Mroh3      | 0.0000 | No |
| 37741 | Mroh4      | 0.0000 | No |
| 37742 | Mroh5      | 0.0000 | No |
| 37743 | Mroh6      | 0.0000 | No |
| 37744 | Mroh7      | 0.0000 | No |
| 37745 | Mroh8      | 0.0000 | No |
| 37746 | Mroh9      | 0.0000 | No |
| 37747 | Mrpl1      | 0.0000 | No |
| 37748 | Mrpl10     | 0.0000 | No |
| 37749 | Mrpl11     | 0.0000 | No |
| 37750 | Mrpl12     | 0.0000 | No |
| 37751 | Mrpl13     | 0.0000 | No |
| 37752 | Mrpl14     | 0.0000 | No |
| 37753 | Mrpl15     | 0.0000 | No |
| 37754 | Mrpl16     | 0.0000 | No |
| 37755 | Mrpl17     | 0.0000 | No |
| 37756 | Mrpl18     | 0.0000 | No |
| 37757 | Mrpl19     | 0.0000 | No |
| 37758 | Mrpl2      | 0.0000 | No |
| 37759 | Mrpl20     | 0.0000 | No |
| 37760 | Mrpl21     | 0.0000 | No |
| 37761 | Mrpl22     | 0.0000 | No |
| 37762 | Mrpl23     | 0.0000 | No |
| 37763 | Mrpl23-ps1 | 0.0000 | No |

|       |           |        |    |
|-------|-----------|--------|----|
| 37764 | Mrpl24    | 0.0000 | No |
| 37765 | Mrpl27    | 0.0000 | No |
| 37766 | Mrpl28    | 0.0000 | No |
| 37767 | Mrpl3     | 0.0000 | No |
| 37768 | Mrpl30    | 0.0000 | No |
| 37769 | Mrpl32    | 0.0000 | No |
| 37770 | Mrpl33    | 0.0000 | No |
| 37771 | Mrpl34    | 0.0000 | No |
| 37772 | Mrpl35    | 0.0000 | No |
| 37773 | Mrpl36    | 0.0000 | No |
| 37774 | Mrpl37    | 0.0000 | No |
| 37775 | Mrpl38    | 0.0000 | No |
| 37776 | Mrpl39    | 0.0000 | No |
| 37777 | Mrpl4     | 0.0000 | No |
| 37778 | Mrpl40    | 0.0000 | No |
| 37779 | Mrpl41    | 0.0000 | No |
| 37780 | Mrpl42    | 0.0000 | No |
| 37781 | Mrpl43    | 0.0000 | No |
| 37782 | Mrpl44    | 0.0000 | No |
| 37783 | Mrpl45    | 0.0000 | No |
| 37784 | Mrpl46    | 0.0000 | No |
| 37785 | Mrpl47    | 0.0000 | No |
| 37786 | Mrpl48    | 0.0000 | No |
| 37787 | Mrpl48-ps | 0.0000 | No |
| 37788 | Mrpl49    | 0.0000 | No |
| 37789 | Mrpl50    | 0.0000 | No |
| 37790 | Mrpl51    | 0.0000 | No |
| 37791 | Mrpl52    | 0.0000 | No |
| 37792 | Mrpl53    | 0.0000 | No |
| 37793 | Mrpl55    | 0.0000 | No |
| 37794 | Mrpl57    | 0.0000 | No |
| 37795 | Mrpl58    | 0.0000 | No |
| 37796 | Mrpl9     | 0.0000 | No |
| 37797 | Mrps10    | 0.0000 | No |
| 37798 | Mrps11    | 0.0000 | No |
| 37799 | Mrps12    | 0.0000 | No |
| 37800 | Mrps14    | 0.0000 | No |
| 37801 | Mrps15    | 0.0000 | No |
| 37802 | Mrps16    | 0.0000 | No |
| 37803 | Mrps17    | 0.0000 | No |
| 37804 | Mrps18a   | 0.0000 | No |
| 37805 | Mrps18b   | 0.0000 | No |
| 37806 | Mrps2     | 0.0000 | No |
| 37807 | Mrps21    | 0.0000 | No |
| 37808 | Mrps22    | 0.0000 | No |
| 37809 | Mrps23    | 0.0000 | No |

|       |            |        |    |
|-------|------------|--------|----|
| 37810 | Mrps24     | 0.0000 | No |
| 37811 | Mrps25     | 0.0000 | No |
| 37812 | Mrps26     | 0.0000 | No |
| 37813 | Mrps27     | 0.0000 | No |
| 37814 | Mrps28     | 0.0000 | No |
| 37815 | Mrps30     | 0.0000 | No |
| 37816 | Mrps31     | 0.0000 | No |
| 37817 | Mrps33     | 0.0000 | No |
| 37818 | Mrps34     | 0.0000 | No |
| 37819 | Mrps35     | 0.0000 | No |
| 37820 | Mrps36     | 0.0000 | No |
| 37821 | Mrps36-ps1 | 0.0000 | No |
| 37822 | Mrps36-ps3 | 0.0000 | No |
| 37823 | Mrps5      | 0.0000 | No |
| 37824 | Mrps6      | 0.0000 | No |
| 37825 | Mrps7      | 0.0000 | No |
| 37826 | Mrps9      | 0.0000 | No |
| 37827 | Mrrf       | 0.0000 | No |
| 37828 | Mrs2       | 0.0000 | No |
| 37829 | Mrto4      | 0.0000 | No |
| 37830 | Mrto4-ps2  | 0.0000 | No |
| 37831 | Mrvi1      | 0.0000 | No |
| 37832 | Ms4a13     | 0.0000 | No |
| 37833 | Ms4a14     | 0.0000 | No |
| 37834 | Ms4a18     | 0.0000 | No |
| 37835 | Ms4a2      | 0.0000 | No |
| 37836 | Ms4a3      | 0.0000 | No |
| 37837 | Ms4a4a     | 0.0000 | No |
| 37838 | Ms4a4b     | 0.0000 | No |
| 37839 | Ms4a4c     | 0.0000 | No |
| 37840 | Ms4a4d     | 0.0000 | No |
| 37841 | Ms4a5      | 0.0000 | No |
| 37842 | Ms4a6c     | 0.0000 | No |
| 37843 | Ms4a6d     | 0.0000 | No |
| 37844 | Ms4a7      | 0.0000 | No |
| 37845 | Ms4a8a     | 0.0000 | No |
| 37846 | Msantd1    | 0.0000 | No |
| 37847 | Msantd2    | 0.0000 | No |
| 37848 | Msantd3    | 0.0000 | No |
| 37849 | Msantd4    | 0.0000 | No |
| 37850 | Msc        | 0.0000 | No |
| 37851 | Msgn1      | 0.0000 | No |
| 37852 | Msh2       | 0.0000 | No |
| 37853 | Msh3       | 0.0000 | No |
| 37854 | Msh4       | 0.0000 | No |
| 37855 | Msh5       | 0.0000 | No |

|       |         |        |    |
|-------|---------|--------|----|
| 37856 | Msh6    | 0.0000 | No |
| 37857 | Msi1    | 0.0000 | No |
| 37858 | Msi2    | 0.0000 | No |
| 37859 | Msl1    | 0.0000 | No |
| 37860 | Msl2    | 0.0000 | No |
| 37861 | Msl3    | 0.0000 | No |
| 37862 | Msl3l2  | 0.0000 | No |
| 37863 | Msln    | 0.0000 | No |
| 37864 | Mslnl   | 0.0000 | No |
| 37865 | Msemb   | 0.0000 | No |
| 37866 | Msmo1   | 0.0000 | No |
| 37867 | Msmpl   | 0.0000 | No |
| 37868 | Msn     | 0.0000 | No |
| 37869 | Msr1    | 0.0000 | No |
| 37870 | Msra    | 0.0000 | No |
| 37871 | Msrbl   | 0.0000 | No |
| 37872 | Msrbl2  | 0.0000 | No |
| 37873 | Msrbl3  | 0.0000 | No |
| 37874 | Mss5l   | 0.0000 | No |
| 37875 | Mst1    | 0.0000 | No |
| 37876 | Mst1r   | 0.0000 | No |
| 37877 | Mstn    | 0.0000 | No |
| 37878 | Msto1   | 0.0000 | No |
| 37879 | Msx1    | 0.0000 | No |
| 37880 | Msx2    | 0.0000 | No |
| 37881 | Msx3    | 0.0000 | No |
| 37882 | Mt1     | 0.0000 | No |
| 37883 | Mt2     | 0.0000 | No |
| 37884 | Mt4     | 0.0000 | No |
| 37885 | Mta1    | 0.0000 | No |
| 37886 | Mta2    | 0.0000 | No |
| 37887 | Mta3    | 0.0000 | No |
| 37888 | Mtag2   | 0.0000 | No |
| 37889 | Mtap    | 0.0000 | No |
| 37890 | Mtap7d3 | 0.0000 | No |
| 37891 | mt-Atp6 | 0.0000 | No |
| 37892 | mt-Atp8 | 0.0000 | No |
| 37893 | Mtbp    | 0.0000 | No |
| 37894 | Mtch1   | 0.0000 | No |
| 37895 | Mtch2   | 0.0000 | No |
| 37896 | mt-Co1  | 0.0000 | No |
| 37897 | mt-Co2  | 0.0000 | No |
| 37898 | Mtcp1   | 0.0000 | No |
| 37899 | mt-Cytb | 0.0000 | No |
| 37900 | Mtdh    | 0.0000 | No |
| 37901 | Mterf1a | 0.0000 | No |



|       |           |        |    |
|-------|-----------|--------|----|
| 37902 | Mterf1b   | 0.0000 | No |
| 37903 | Mterf2    | 0.0000 | No |
| 37904 | Mterf3    | 0.0000 | No |
| 37905 | Mterf4    | 0.0000 | No |
| 37906 | Mtf1      | 0.0000 | No |
| 37907 | Mtf2      | 0.0000 | No |
| 37908 | Mtfmt     | 0.0000 | No |
| 37909 | Mtfp1     | 0.0000 | No |
| 37910 | Mtfr1     | 0.0000 | No |
| 37911 | Mtfr11    | 0.0000 | No |
| 37912 | Mtfr2     | 0.0000 | No |
| 37913 | Mtg1      | 0.0000 | No |
| 37914 | Mtg2      | 0.0000 | No |
| 37915 | Mthfd1    | 0.0000 | No |
| 37916 | Mthfd11   | 0.0000 | No |
| 37917 | Mthfd21   | 0.0000 | No |
| 37918 | Mthfr     | 0.0000 | No |
| 37919 | Mthfr-ps1 | 0.0000 | No |
| 37920 | Mthfs     | 0.0000 | No |
| 37921 | Mthfsd    | 0.0000 | No |
| 37922 | Mthfsl    | 0.0000 | No |
| 37923 | Mtif2     | 0.0000 | No |
| 37924 | Mtif3     | 0.0000 | No |
| 37925 | Mtl5      | 0.0000 | No |
| 37926 | Mtm1      | 0.0000 | No |
| 37927 | Mtmr1     | 0.0000 | No |
| 37928 | Mtmr10    | 0.0000 | No |
| 37929 | Mtmr11    | 0.0000 | No |
| 37930 | Mtmr14    | 0.0000 | No |
| 37931 | Mtmr2     | 0.0000 | No |
| 37932 | Mtmr3     | 0.0000 | No |
| 37933 | Mtmr4     | 0.0000 | No |
| 37934 | Mtmr6     | 0.0000 | No |
| 37935 | Mtmr7     | 0.0000 | No |
| 37936 | Mtmr9     | 0.0000 | No |
| 37937 | mt-Nd1    | 0.0000 | No |
| 37938 | mt-Nd2    | 0.0000 | No |
| 37939 | mt-Nd3    | 0.0000 | No |
| 37940 | mt-Nd4    | 0.0000 | No |
| 37941 | mt-Nd4l   | 0.0000 | No |
| 37942 | mt-Nd5    | 0.0000 | No |
| 37943 | mt-Nd6    | 0.0000 | No |
| 37944 | Mtnr1a    | 0.0000 | No |
| 37945 | Mtnr1b    | 0.0000 | No |
| 37946 | Mto1      | 0.0000 | No |
| 37947 | Mtor      | 0.0000 | No |

|       |        |        |    |
|-------|--------|--------|----|
| 37948 | Mtpap  | 0.0000 | No |
| 37949 | Mtpn   | 0.0000 | No |
| 37950 | Mtr    | 0.0000 | No |
| 37951 | Mtrf1  | 0.0000 | No |
| 37952 | Mtrf11 | 0.0000 | No |
| 37953 | Mtrr   | 0.0000 | No |
| 37954 | Mtss1  | 0.0000 | No |
| 37955 | Mtss11 | 0.0000 | No |
| 37956 | mt-Ta  | 0.0000 | No |
| 37957 | mt-Td  | 0.0000 | No |
| 37958 | mt-Te  | 0.0000 | No |
| 37959 | mt-Tf  | 0.0000 | No |
| 37960 | mt-Tg  | 0.0000 | No |
| 37961 | mt-Th  | 0.0000 | No |
| 37962 | mt-Ti  | 0.0000 | No |
| 37963 | mt-Tk  | 0.0000 | No |
| 37964 | mt-Tl1 | 0.0000 | No |
| 37965 | mt-Tl2 | 0.0000 | No |
| 37966 | mt-Tm  | 0.0000 | No |
| 37967 | mt-Tn  | 0.0000 | No |
| 37968 | mt-Tp  | 0.0000 | No |
| 37969 | Mttp   | 0.0000 | No |
| 37970 | mt-Tq  | 0.0000 | No |
| 37971 | mt-Tr  | 0.0000 | No |
| 37972 | mt-Ts1 | 0.0000 | No |
| 37973 | mt-Ts2 | 0.0000 | No |
| 37974 | mt-Tt  | 0.0000 | No |
| 37975 | mt-Tv  | 0.0000 | No |
| 37976 | mt-Tw  | 0.0000 | No |
| 37977 | mt-Ty  | 0.0000 | No |
| 37978 | Mturn  | 0.0000 | No |
| 37979 | Mtus1  | 0.0000 | No |
| 37980 | Mtus2  | 0.0000 | No |
| 37981 | Mtx1   | 0.0000 | No |
| 37982 | Mtx2   | 0.0000 | No |
| 37983 | Mtx3   | 0.0000 | No |
| 37984 | Muc13  | 0.0000 | No |
| 37985 | Muc16  | 0.0000 | No |
| 37986 | Muc19  | 0.0000 | No |
| 37987 | Muc20  | 0.0000 | No |
| 37988 | Muc3   | 0.0000 | No |
| 37989 | Muc3a  | 0.0000 | No |
| 37990 | Muc5ac | 0.0000 | No |
| 37991 | Muc5b  | 0.0000 | No |
| 37992 | Muc6   | 0.0000 | No |
| 37993 | Muc11  | 0.0000 | No |

|       |          |        |    |
|-------|----------|--------|----|
| 37994 | Mucl2    | 0.0000 | No |
| 37995 | Mug1     | 0.0000 | No |
| 37996 | Mug2     | 0.0000 | No |
| 37997 | Mug4-ps  | 0.0000 | No |
| 37998 | Mug-ps1  | 0.0000 | No |
| 37999 | Mul1     | 0.0000 | No |
| 38000 | Mum1     | 0.0000 | No |
| 38001 | Mum111   | 0.0000 | No |
| 38002 | Mup1     | 0.0000 | No |
| 38003 | Mup12    | 0.0000 | No |
| 38004 | Mup13    | 0.0000 | No |
| 38005 | Mup14    | 0.0000 | No |
| 38006 | Mup15    | 0.0000 | No |
| 38007 | Mup16    | 0.0000 | No |
| 38008 | Mup17    | 0.0000 | No |
| 38009 | Mup18    | 0.0000 | No |
| 38010 | Mup19    | 0.0000 | No |
| 38011 | Mup2     | 0.0000 | No |
| 38012 | Mup20    | 0.0000 | No |
| 38013 | Mup3     | 0.0000 | No |
| 38014 | Mup4     | 0.0000 | No |
| 38015 | Mup5     | 0.0000 | No |
| 38016 | Mup6     | 0.0000 | No |
| 38017 | Mup8     | 0.0000 | No |
| 38018 | Mup9     | 0.0000 | No |
| 38019 | Mup-ps10 | 0.0000 | No |
| 38020 | Mup-ps11 | 0.0000 | No |
| 38021 | Mup-ps12 | 0.0000 | No |
| 38022 | Mup-ps13 | 0.0000 | No |
| 38023 | Mup-ps14 | 0.0000 | No |
| 38024 | Mup-ps15 | 0.0000 | No |
| 38025 | Mup-ps17 | 0.0000 | No |
| 38026 | Mup-ps2  | 0.0000 | No |
| 38027 | Mup-ps21 | 0.0000 | No |
| 38028 | Mup-ps22 | 0.0000 | No |
| 38029 | Mup-ps23 | 0.0000 | No |
| 38030 | Mup-ps24 | 0.0000 | No |
| 38031 | Mup-ps26 | 0.0000 | No |
| 38032 | Mup-ps28 | 0.0000 | No |
| 38033 | Mup-ps29 | 0.0000 | No |
| 38034 | Mup-ps4  | 0.0000 | No |
| 38035 | Mup-ps5  | 0.0000 | No |
| 38036 | Mup-ps6  | 0.0000 | No |
| 38037 | Mup-ps7  | 0.0000 | No |
| 38038 | Mup-ps8  | 0.0000 | No |
| 38039 | Mup-ps9  | 0.0000 | No |

|       |           |        |    |
|-------|-----------|--------|----|
| 38040 | Murc      | 0.0000 | No |
| 38041 | Mus81     | 0.0000 | No |
| 38042 | Musk      | 0.0000 | No |
| 38043 | Mustn1    | 0.0000 | No |
| 38044 | Mut       | 0.0000 | No |
| 38045 | Mutyh     | 0.0000 | No |
| 38046 | Mvb12a    | 0.0000 | No |
| 38047 | Mvb12b    | 0.0000 | No |
| 38048 | Mvd       | 0.0000 | No |
| 38049 | Mvk       | 0.0000 | No |
| 38050 | Mvp       | 0.0000 | No |
| 38051 | Mx1       | 0.0000 | No |
| 38052 | Mx2       | 0.0000 | No |
| 38053 | Mxd1      | 0.0000 | No |
| 38054 | Mxd3      | 0.0000 | No |
| 38055 | Mxd4      | 0.0000 | No |
| 38056 | Mxi1      | 0.0000 | No |
| 38057 | Mxra7     | 0.0000 | No |
| 38058 | Mxra8     | 0.0000 | No |
| 38059 | Mxra8os   | 0.0000 | No |
| 38060 | Myadm     | 0.0000 | No |
| 38061 | Myadml2os | 0.0000 | No |
| 38062 | Myb       | 0.0000 | No |
| 38063 | Mybbp1a   | 0.0000 | No |
| 38064 | Mybl1     | 0.0000 | No |
| 38065 | Mybl2     | 0.0000 | No |
| 38066 | Mybpc1    | 0.0000 | No |
| 38067 | Mybpc2    | 0.0000 | No |
| 38068 | Mybpc3    | 0.0000 | No |
| 38069 | Mybph     | 0.0000 | No |
| 38070 | Mybphl    | 0.0000 | No |
| 38071 | Myc       | 0.0000 | No |
| 38072 | Mycbp     | 0.0000 | No |
| 38073 | Mycbp2    | 0.0000 | No |
| 38074 | Mycbpap   | 0.0000 | No |
| 38075 | Mycl      | 0.0000 | No |
| 38076 | Mycn      | 0.0000 | No |
| 38077 | Myes      | 0.0000 | No |
| 38078 | Myct1     | 0.0000 | No |
| 38079 | Myd88     | 0.0000 | No |
| 38080 | Mydgf     | 0.0000 | No |
| 38081 | Myef2     | 0.0000 | No |
| 38082 | Myeov2    | 0.0000 | No |
| 38083 | Myf5      | 0.0000 | No |
| 38084 | Myf6      | 0.0000 | No |
| 38085 | Myg1      | 0.0000 | No |

|       |        |        |    |
|-------|--------|--------|----|
| 38086 | Myh1   | 0.0000 | No |
| 38087 | Myh10  | 0.0000 | No |
| 38088 | Myh11  | 0.0000 | No |
| 38089 | Myh13  | 0.0000 | No |
| 38090 | Myh14  | 0.0000 | No |
| 38091 | Myh2   | 0.0000 | No |
| 38092 | Myh3   | 0.0000 | No |
| 38093 | Myh6   | 0.0000 | No |
| 38094 | Myh7   | 0.0000 | No |
| 38095 | Myh7b  | 0.0000 | No |
| 38096 | Myh8   | 0.0000 | No |
| 38097 | Myh9   | 0.0000 | No |
| 38098 | Myl1   | 0.0000 | No |
| 38099 | Myl10  | 0.0000 | No |
| 38100 | Myl12a | 0.0000 | No |
| 38101 | Myl12b | 0.0000 | No |
| 38102 | Myl2   | 0.0000 | No |
| 38103 | Myl4   | 0.0000 | No |
| 38104 | Myl6   | 0.0000 | No |
| 38105 | Myl6b  | 0.0000 | No |
| 38106 | Myl7   | 0.0000 | No |
| 38107 | Mylip  | 0.0000 | No |
| 38108 | Mylk   | 0.0000 | No |
| 38109 | Mylk2  | 0.0000 | No |
| 38110 | Mylk3  | 0.0000 | No |
| 38111 | Mylk4  | 0.0000 | No |
| 38112 | Mylpf  | 0.0000 | No |
| 38113 | Mynn   | 0.0000 | No |
| 38114 | Myo10  | 0.0000 | No |
| 38115 | Myo15  | 0.0000 | No |
| 38116 | Myo15b | 0.0000 | No |
| 38117 | Myo16  | 0.0000 | No |
| 38118 | Myo18b | 0.0000 | No |
| 38119 | Myo19  | 0.0000 | No |
| 38120 | Myo1a  | 0.0000 | No |
| 38121 | Myo1b  | 0.0000 | No |
| 38122 | Myo1c  | 0.0000 | No |
| 38123 | Myo1d  | 0.0000 | No |
| 38124 | Myo1f  | 0.0000 | No |
| 38125 | Myo1g  | 0.0000 | No |
| 38126 | Myo1h  | 0.0000 | No |
| 38127 | Myo3a  | 0.0000 | No |
| 38128 | Myo3b  | 0.0000 | No |
| 38129 | Myo5b  | 0.0000 | No |
| 38130 | Myo5c  | 0.0000 | No |
| 38131 | Myo6   | 0.0000 | No |

|       |          |        |    |
|-------|----------|--------|----|
| 38132 | Myo7a    | 0.0000 | No |
| 38133 | Myo7b    | 0.0000 | No |
| 38134 | Myo9a    | 0.0000 | No |
| 38135 | Myo9b    | 0.0000 | No |
| 38136 | Myocd    | 0.0000 | No |
| 38137 | Myod1    | 0.0000 | No |
| 38138 | Myom1    | 0.0000 | No |
| 38139 | Myom2    | 0.0000 | No |
| 38140 | Myom3    | 0.0000 | No |
| 38141 | Myot     | 0.0000 | No |
| 38142 | Myoz1    | 0.0000 | No |
| 38143 | Myoz2    | 0.0000 | No |
| 38144 | Myoz3    | 0.0000 | No |
| 38145 | Mypn     | 0.0000 | No |
| 38146 | Mypop    | 0.0000 | No |
| 38147 | Mypopos  | 0.0000 | No |
| 38148 | Myrf     | 0.0000 | No |
| 38149 | Myrf1    | 0.0000 | No |
| 38150 | Myrip    | 0.0000 | No |
| 38151 | Mysm1    | 0.0000 | No |
| 38152 | Myt1     | 0.0000 | No |
| 38153 | Myt11    | 0.0000 | No |
| 38154 | Myzap    | 0.0000 | No |
| 38155 | Mzfl     | 0.0000 | No |
| 38156 | Mzt1     | 0.0000 | No |
| 38157 | N4bp1    | 0.0000 | No |
| 38158 | N4bp2l1  | 0.0000 | No |
| 38159 | N4bp2l2  | 0.0000 | No |
| 38160 | N4bp2os  | 0.0000 | No |
| 38161 | N4bp3    | 0.0000 | No |
| 38162 | N6amt1   | 0.0000 | No |
| 38163 | Naa10    | 0.0000 | No |
| 38164 | Naa11    | 0.0000 | No |
| 38165 | Naa15    | 0.0000 | No |
| 38166 | Naa16    | 0.0000 | No |
| 38167 | Naa20    | 0.0000 | No |
| 38168 | Naa25    | 0.0000 | No |
| 38169 | Naa30    | 0.0000 | No |
| 38170 | Naa35    | 0.0000 | No |
| 38171 | Naa38    | 0.0000 | No |
| 38172 | Naa40    | 0.0000 | No |
| 38173 | Naa50    | 0.0000 | No |
| 38174 | Naa60    | 0.0000 | No |
| 38175 | Naaa     | 0.0000 | No |
| 38176 | Naalad2  | 0.0000 | No |
| 38177 | Naaladl1 | 0.0000 | No |

|       |           |        |    |
|-------|-----------|--------|----|
| 38178 | Naaladl2  | 0.0000 | No |
| 38179 | Nab1      | 0.0000 | No |
| 38180 | Nab2      | 0.0000 | No |
| 38181 | Nabp1     | 0.0000 | No |
| 38182 | Nabp2     | 0.0000 | No |
| 38183 | Naca      | 0.0000 | No |
| 38184 | Nacad     | 0.0000 | No |
| 38185 | Nacc1     | 0.0000 | No |
| 38186 | Nacc2     | 0.0000 | No |
| 38187 | Nadk      | 0.0000 | No |
| 38188 | Nadk2     | 0.0000 | No |
| 38189 | Nae1      | 0.0000 | No |
| 38190 | Naf1      | 0.0000 | No |
| 38191 | Naga      | 0.0000 | No |
| 38192 | Nagk      | 0.0000 | No |
| 38193 | Naglu     | 0.0000 | No |
| 38194 | Nagpa     | 0.0000 | No |
| 38195 | Nags      | 0.0000 | No |
| 38196 | Naif1     | 0.0000 | No |
| 38197 | Naip1     | 0.0000 | No |
| 38198 | Naip3     | 0.0000 | No |
| 38199 | Nalen     | 0.0000 | No |
| 38200 | Nampt     | 0.0000 | No |
| 38201 | Nanog     | 0.0000 | No |
| 38202 | Nanog-ps1 | 0.0000 | No |
| 38203 | Nanog-ps2 | 0.0000 | No |
| 38204 | Nanos1    | 0.0000 | No |
| 38205 | Nanos2    | 0.0000 | No |
| 38206 | Nanos3    | 0.0000 | No |
| 38207 | Nanp      | 0.0000 | No |
| 38208 | Nans      | 0.0000 | No |
| 38209 | Nap111    | 0.0000 | No |
| 38210 | Nap112    | 0.0000 | No |
| 38211 | Nap114    | 0.0000 | No |
| 38212 | Nap115    | 0.0000 | No |
| 38213 | Napb      | 0.0000 | No |
| 38214 | Napepld   | 0.0000 | No |
| 38215 | Napg      | 0.0000 | No |
| 38216 | Narf      | 0.0000 | No |
| 38217 | Narfl     | 0.0000 | No |
| 38218 | Nars      | 0.0000 | No |
| 38219 | Nars2     | 0.0000 | No |
| 38220 | Nasp      | 0.0000 | No |
| 38221 | Nasp-ps1  | 0.0000 | No |
| 38222 | Nat1      | 0.0000 | No |
| 38223 | Nat10     | 0.0000 | No |

|       |          |        |    |
|-------|----------|--------|----|
| 38224 | Nat14    | 0.0000 | No |
| 38225 | Nat2     | 0.0000 | No |
| 38226 | Nat3     | 0.0000 | No |
| 38227 | Nat6     | 0.0000 | No |
| 38228 | Nat8b-ps | 0.0000 | No |
| 38229 | Nat8f1   | 0.0000 | No |
| 38230 | Nat8f2   | 0.0000 | No |
| 38231 | Nat8f3   | 0.0000 | No |
| 38232 | Nat8f4   | 0.0000 | No |
| 38233 | Nat8f5   | 0.0000 | No |
| 38234 | Nat8f6   | 0.0000 | No |
| 38235 | Nat8f7   | 0.0000 | No |
| 38236 | Nat8l    | 0.0000 | No |
| 38237 | Nat9     | 0.0000 | No |
| 38238 | Natd1    | 0.0000 | No |
| 38239 | Nav1     | 0.0000 | No |
| 38240 | Nav2     | 0.0000 | No |
| 38241 | Nav3     | 0.0000 | No |
| 38242 | Naxd     | 0.0000 | No |
| 38243 | Nbas     | 0.0000 | No |
| 38244 | Nbea     | 0.0000 | No |
| 38245 | Nbeal1   | 0.0000 | No |
| 38246 | Nbl1     | 0.0000 | No |
| 38247 | Nbn      | 0.0000 | No |
| 38248 | Nbr1     | 0.0000 | No |
| 38249 | Ncald    | 0.0000 | No |
| 38250 | Ncam1    | 0.0000 | No |
| 38251 | Ncam2    | 0.0000 | No |
| 38252 | Ncan     | 0.0000 | No |
| 38253 | Ncapd2   | 0.0000 | No |
| 38254 | Ncapd3   | 0.0000 | No |
| 38255 | Ncapg    | 0.0000 | No |
| 38256 | Ncapg2   | 0.0000 | No |
| 38257 | Ncaph    | 0.0000 | No |
| 38258 | Ncaph2   | 0.0000 | No |
| 38259 | Ncbp2    | 0.0000 | No |
| 38260 | Ncbp3    | 0.0000 | No |
| 38261 | Nccrp1   | 0.0000 | No |
| 38262 | Ncdn     | 0.0000 | No |
| 38263 | Nceh1    | 0.0000 | No |
| 38264 | Ncf1     | 0.0000 | No |
| 38265 | Ncf2     | 0.0000 | No |
| 38266 | Ncf4     | 0.0000 | No |
| 38267 | Nck1     | 0.0000 | No |
| 38268 | Nck2     | 0.0000 | No |
| 38269 | Nckap11  | 0.0000 | No |



|       |           |        |    |
|-------|-----------|--------|----|
| 38270 | Nckap5    | 0.0000 | No |
| 38271 | Nckap5l   | 0.0000 | No |
| 38272 | Nckap5los | 0.0000 | No |
| 38273 | Nckipsd   | 0.0000 | No |
| 38274 | Ncl       | 0.0000 | No |
| 38275 | Ncln      | 0.0000 | No |
| 38276 | Ncmap     | 0.0000 | No |
| 38277 | Ncoa1     | 0.0000 | No |
| 38278 | Ncoa2     | 0.0000 | No |
| 38279 | Ncoa3     | 0.0000 | No |
| 38280 | Ncoa4     | 0.0000 | No |
| 38281 | Ncoa5     | 0.0000 | No |
| 38282 | Ncoa6     | 0.0000 | No |
| 38283 | Ncoa7     | 0.0000 | No |
| 38284 | Ncor2     | 0.0000 | No |
| 38285 | Ncr3-ps   | 0.0000 | No |
| 38286 | Ncs1      | 0.0000 | No |
| 38287 | Ncstn     | 0.0000 | No |
| 38288 | Ndc1      | 0.0000 | No |
| 38289 | Ndc80     | 0.0000 | No |
| 38290 | Nde1      | 0.0000 | No |
| 38291 | Nde1l     | 0.0000 | No |
| 38292 | Ndfip1    | 0.0000 | No |
| 38293 | Ndfip2    | 0.0000 | No |
| 38294 | Ndnf      | 0.0000 | No |
| 38295 | Ndnl2     | 0.0000 | No |
| 38296 | Ndor1     | 0.0000 | No |
| 38297 | Ndp       | 0.0000 | No |
| 38298 | Ndrg1     | 0.0000 | No |
| 38299 | Ndrg3     | 0.0000 | No |
| 38300 | Ndrg4     | 0.0000 | No |
| 38301 | Ndst1     | 0.0000 | No |
| 38302 | Ndst2     | 0.0000 | No |
| 38303 | Ndst3     | 0.0000 | No |
| 38304 | Ndufa1    | 0.0000 | No |
| 38305 | Ndufa10   | 0.0000 | No |
| 38306 | Ndufa11   | 0.0000 | No |
| 38307 | Ndufa12   | 0.0000 | No |
| 38308 | Ndufa13   | 0.0000 | No |
| 38309 | Ndufa2    | 0.0000 | No |
| 38310 | Ndufa3    | 0.0000 | No |
| 38311 | Ndufa4    | 0.0000 | No |
| 38312 | Ndufa4l2  | 0.0000 | No |
| 38313 | Ndufa5    | 0.0000 | No |
| 38314 | Ndufa6    | 0.0000 | No |
| 38315 | Ndufa8    | 0.0000 | No |

|       |            |        |    |
|-------|------------|--------|----|
| 38316 | Ndufa9     | 0.0000 | No |
| 38317 | Ndufab1    | 0.0000 | No |
| 38318 | Ndufab1-ps | 0.0000 | No |
| 38319 | Ndufaf1    | 0.0000 | No |
| 38320 | Ndufaf2    | 0.0000 | No |
| 38321 | Ndufaf3    | 0.0000 | No |
| 38322 | Ndufaf4    | 0.0000 | No |
| 38323 | Ndufaf5    | 0.0000 | No |
| 38324 | Ndufaf6    | 0.0000 | No |
| 38325 | Ndufaf7    | 0.0000 | No |
| 38326 | Ndufaf8    | 0.0000 | No |
| 38327 | Ndufb10    | 0.0000 | No |
| 38328 | Ndufb11    | 0.0000 | No |
| 38329 | Ndufb2     | 0.0000 | No |
| 38330 | Ndufb3     | 0.0000 | No |
| 38331 | Ndufb4     | 0.0000 | No |
| 38332 | Ndufb5     | 0.0000 | No |
| 38333 | Ndufb6     | 0.0000 | No |
| 38334 | Ndufb7     | 0.0000 | No |
| 38335 | Ndufb8     | 0.0000 | No |
| 38336 | Ndufb9     | 0.0000 | No |
| 38337 | Ndufc1     | 0.0000 | No |
| 38338 | Ndufc2     | 0.0000 | No |
| 38339 | Ndufs1     | 0.0000 | No |
| 38340 | Ndufs2     | 0.0000 | No |
| 38341 | Ndufs3     | 0.0000 | No |
| 38342 | Ndufs4     | 0.0000 | No |
| 38343 | Ndufs5     | 0.0000 | No |
| 38344 | Ndufs6     | 0.0000 | No |
| 38345 | Ndufs7     | 0.0000 | No |
| 38346 | Ndufs8     | 0.0000 | No |
| 38347 | Ndufv1     | 0.0000 | No |
| 38348 | Ndufv2     | 0.0000 | No |
| 38349 | Ndufv3     | 0.0000 | No |
| 38350 | Neat1      | 0.0000 | No |
| 38351 | Neb        | 0.0000 | No |
| 38352 | Neb1       | 0.0000 | No |
| 38353 | Necab1     | 0.0000 | No |
| 38354 | Necab2     | 0.0000 | No |
| 38355 | Necab3     | 0.0000 | No |
| 38356 | Necap1     | 0.0000 | No |
| 38357 | Necap2     | 0.0000 | No |
| 38358 | Nectin1    | 0.0000 | No |
| 38359 | Nectin2    | 0.0000 | No |
| 38360 | Nectin3    | 0.0000 | No |
| 38361 | Nectin4    | 0.0000 | No |

|       |         |        |    |
|-------|---------|--------|----|
| 38362 | Nedd1   | 0.0000 | No |
| 38363 | Nedd4   | 0.0000 | No |
| 38364 | Nedd4l  | 0.0000 | No |
| 38365 | Nedd8   | 0.0000 | No |
| 38366 | Nedd9   | 0.0000 | No |
| 38367 | Nefl    | 0.0000 | No |
| 38368 | Nefm    | 0.0000 | No |
| 38369 | Neil1   | 0.0000 | No |
| 38370 | Neil2   | 0.0000 | No |
| 38371 | Neil3   | 0.0000 | No |
| 38372 | Nek1    | 0.0000 | No |
| 38373 | Nek10   | 0.0000 | No |
| 38374 | Nek11   | 0.0000 | No |
| 38375 | Nek2    | 0.0000 | No |
| 38376 | Nek3    | 0.0000 | No |
| 38377 | Nek4    | 0.0000 | No |
| 38378 | Nek5    | 0.0000 | No |
| 38379 | Nek6    | 0.0000 | No |
| 38380 | Nek7    | 0.0000 | No |
| 38381 | Nek8    | 0.0000 | No |
| 38382 | Nek9    | 0.0000 | No |
| 38383 | Nelfa   | 0.0000 | No |
| 38384 | Nelfcd  | 0.0000 | No |
| 38385 | Nelfe   | 0.0000 | No |
| 38386 | Nell1   | 0.0000 | No |
| 38387 | Nell1os | 0.0000 | No |
| 38388 | Nell2   | 0.0000 | No |
| 38389 | Nemf    | 0.0000 | No |
| 38390 | Nemp1   | 0.0000 | No |
| 38391 | Nemp2   | 0.0000 | No |
| 38392 | Nenf    | 0.0000 | No |
| 38393 | Neo1    | 0.0000 | No |
| 38394 | Nepn    | 0.0000 | No |
| 38395 | Nepro   | 0.0000 | No |
| 38396 | Nes     | 0.0000 | No |
| 38397 | Nespas  | 0.0000 | No |
| 38398 | Net1    | 0.0000 | No |
| 38399 | Neto1   | 0.0000 | No |
| 38400 | Neto2   | 0.0000 | No |
| 38401 | Neu1    | 0.0000 | No |
| 38402 | Neu3    | 0.0000 | No |
| 38403 | Neu4    | 0.0000 | No |
| 38404 | Neur1a  | 0.0000 | No |
| 38405 | Neur1b  | 0.0000 | No |
| 38406 | Neur2   | 0.0000 | No |
| 38407 | Neur4   | 0.0000 | No |

|       |          |        |    |
|-------|----------|--------|----|
| 38408 | Neurod1  | 0.0000 | No |
| 38409 | Neurod2  | 0.0000 | No |
| 38410 | Neurod4  | 0.0000 | No |
| 38411 | Neurod6  | 0.0000 | No |
| 38412 | Neurog1  | 0.0000 | No |
| 38413 | Neurog2  | 0.0000 | No |
| 38414 | Neurog3  | 0.0000 | No |
| 38415 | Nexn     | 0.0000 | No |
| 38416 | Nf1      | 0.0000 | No |
| 38417 | Nf2      | 0.0000 | No |
| 38418 | Nfam1    | 0.0000 | No |
| 38419 | Nfasc    | 0.0000 | No |
| 38420 | Nfat5    | 0.0000 | No |
| 38421 | Nfatc1   | 0.0000 | No |
| 38422 | Nfatc2   | 0.0000 | No |
| 38423 | Nfatc2ip | 0.0000 | No |
| 38424 | Nfatc3   | 0.0000 | No |
| 38425 | Nfatc4   | 0.0000 | No |
| 38426 | Nfe2     | 0.0000 | No |
| 38427 | Nfe2l1   | 0.0000 | No |
| 38428 | Nfe2l2   | 0.0000 | No |
| 38429 | Nfe2l3   | 0.0000 | No |
| 38430 | Nfia     | 0.0000 | No |
| 38431 | Nfib     | 0.0000 | No |
| 38432 | Nfic     | 0.0000 | No |
| 38433 | Nfix     | 0.0000 | No |
| 38434 | Nfkb1    | 0.0000 | No |
| 38435 | Nfkb2    | 0.0000 | No |
| 38436 | Nfkbia   | 0.0000 | No |
| 38437 | Nfkbib   | 0.0000 | No |
| 38438 | Nfkbid   | 0.0000 | No |
| 38439 | Nfkbie   | 0.0000 | No |
| 38440 | Nfkbil1  | 0.0000 | No |
| 38441 | Nfkbiz   | 0.0000 | No |
| 38442 | Nfrkb    | 0.0000 | No |
| 38443 | Nfs1     | 0.0000 | No |
| 38444 | Nfu1     | 0.0000 | No |
| 38445 | Nfx1     | 0.0000 | No |
| 38446 | Nfxl1    | 0.0000 | No |
| 38447 | Nfya     | 0.0000 | No |
| 38448 | Nfyb     | 0.0000 | No |
| 38449 | Nfyc     | 0.0000 | No |
| 38450 | Ngb      | 0.0000 | No |
| 38451 | Ngdn     | 0.0000 | No |
| 38452 | Ngef     | 0.0000 | No |
| 38453 | Ngf      | 0.0000 | No |

|       |           |        |    |
|-------|-----------|--------|----|
| 38454 | Ngfr      | 0.0000 | No |
| 38455 | Ngly1     | 0.0000 | No |
| 38456 | Ngp       | 0.0000 | No |
| 38457 | Ngrn      | 0.0000 | No |
| 38458 | Nhej1     | 0.0000 | No |
| 38459 | Nhlh2     | 0.0000 | No |
| 38460 | Nhlrc1    | 0.0000 | No |
| 38461 | Nhlrc2    | 0.0000 | No |
| 38462 | Nhlrc3    | 0.0000 | No |
| 38463 | Nhlrc4    | 0.0000 | No |
| 38464 | Nhp2      | 0.0000 | No |
| 38465 | Nhp211    | 0.0000 | No |
| 38466 | Nhs       | 0.0000 | No |
| 38467 | Nhs11     | 0.0000 | No |
| 38468 | Nhs12     | 0.0000 | No |
| 38469 | Nicn1     | 0.0000 | No |
| 38470 | Nid2      | 0.0000 | No |
| 38471 | Nifk      | 0.0000 | No |
| 38472 | Nim1k     | 0.0000 | No |
| 38473 | Nin       | 0.0000 | No |
| 38474 | Ninj1     | 0.0000 | No |
| 38475 | Ninj2     | 0.0000 | No |
| 38476 | Ninl      | 0.0000 | No |
| 38477 | Nip7      | 0.0000 | No |
| 38478 | Nipa1     | 0.0000 | No |
| 38479 | Nipa2     | 0.0000 | No |
| 38480 | Nipal2    | 0.0000 | No |
| 38481 | Nipal3    | 0.0000 | No |
| 38482 | Nipal4    | 0.0000 | No |
| 38483 | Nipbl     | 0.0000 | No |
| 38484 | Nipsnap1  | 0.0000 | No |
| 38485 | Nipsnap3a | 0.0000 | No |
| 38486 | Nipsnap3b | 0.0000 | No |
| 38487 | Nisch     | 0.0000 | No |
| 38488 | Nit1      | 0.0000 | No |
| 38489 | Nit2      | 0.0000 | No |
| 38490 | Nkain1    | 0.0000 | No |
| 38491 | Nkain2    | 0.0000 | No |
| 38492 | Nkain3    | 0.0000 | No |
| 38493 | Nkain4    | 0.0000 | No |
| 38494 | Nkap      | 0.0000 | No |
| 38495 | Nkapl     | 0.0000 | No |
| 38496 | Nkd1      | 0.0000 | No |
| 38497 | Nkd2      | 0.0000 | No |
| 38498 | Nkg7      | 0.0000 | No |
| 38499 | Nkiras1   | 0.0000 | No |

|       |           |        |    |
|-------|-----------|--------|----|
| 38500 | Nkiras2   | 0.0000 | No |
| 38501 | Nkpd1     | 0.0000 | No |
| 38502 | Nkrf      | 0.0000 | No |
| 38503 | Nktr      | 0.0000 | No |
| 38504 | Nkx1-1    | 0.0000 | No |
| 38505 | Nkx1-2    | 0.0000 | No |
| 38506 | Nkx2-1    | 0.0000 | No |
| 38507 | Nkx2-4    | 0.0000 | No |
| 38508 | Nkx2-5    | 0.0000 | No |
| 38509 | Nkx2-6    | 0.0000 | No |
| 38510 | Nkx2-9    | 0.0000 | No |
| 38511 | Nkx3-1    | 0.0000 | No |
| 38512 | Nkx3-2    | 0.0000 | No |
| 38513 | Nkx6-3    | 0.0000 | No |
| 38514 | Nle1      | 0.0000 | No |
| 38515 | Nlgn2     | 0.0000 | No |
| 38516 | Nlgn3     | 0.0000 | No |
| 38517 | Nlk       | 0.0000 | No |
| 38518 | Nlk-ps1   | 0.0000 | No |
| 38519 | Nln       | 0.0000 | No |
| 38520 | Nlrc4     | 0.0000 | No |
| 38521 | Nlrc5     | 0.0000 | No |
| 38522 | Nlrp10    | 0.0000 | No |
| 38523 | Nlrp12    | 0.0000 | No |
| 38524 | Nlrp14    | 0.0000 | No |
| 38525 | Nlrp1a    | 0.0000 | No |
| 38526 | Nlrp1b    | 0.0000 | No |
| 38527 | Nlrp1c-ps | 0.0000 | No |
| 38528 | Nlrp2     | 0.0000 | No |
| 38529 | Nlrp4a    | 0.0000 | No |
| 38530 | Nlrp4c    | 0.0000 | No |
| 38531 | Nlrp4e    | 0.0000 | No |
| 38532 | Nlrp4f    | 0.0000 | No |
| 38533 | Nlrp4g    | 0.0000 | No |
| 38534 | Nlrp5     | 0.0000 | No |
| 38535 | Nlrp5-ps  | 0.0000 | No |
| 38536 | Nlrp6     | 0.0000 | No |
| 38537 | Nlrp9a    | 0.0000 | No |
| 38538 | Nlrp9b    | 0.0000 | No |
| 38539 | Nlrx1     | 0.0000 | No |
| 38540 | Nmb       | 0.0000 | No |
| 38541 | Nmbr      | 0.0000 | No |
| 38542 | Nme1      | 0.0000 | No |
| 38543 | Nme2      | 0.0000 | No |
| 38544 | Nme3      | 0.0000 | No |
| 38545 | Nme4      | 0.0000 | No |

|       |        |        |    |
|-------|--------|--------|----|
| 38546 | Nme6   | 0.0000 | No |
| 38547 | Nme7   | 0.0000 | No |
| 38548 | Nme9   | 0.0000 | No |
| 38549 | Nmi    | 0.0000 | No |
| 38550 | Nmnat1 | 0.0000 | No |
| 38551 | Nmnat2 | 0.0000 | No |
| 38552 | Nmnat3 | 0.0000 | No |
| 38553 | Nmrk1  | 0.0000 | No |
| 38554 | Nms    | 0.0000 | No |
| 38555 | Nmt1   | 0.0000 | No |
| 38556 | Nmt2   | 0.0000 | No |
| 38557 | Nmu    | 0.0000 | No |
| 38558 | Nmur2  | 0.0000 | No |
| 38559 | Nnat   | 0.0000 | No |
| 38560 | Nnmt   | 0.0000 | No |
| 38561 | Nnt    | 0.0000 | No |
| 38562 | Noa1   | 0.0000 | No |
| 38563 | Nob1   | 0.0000 | No |
| 38564 | Noc2l  | 0.0000 | No |
| 38565 | Noc3l  | 0.0000 | No |
| 38566 | Noc4l  | 0.0000 | No |
| 38567 | Nod1   | 0.0000 | No |
| 38568 | Nod2   | 0.0000 | No |
| 38569 | Nog    | 0.0000 | No |
| 38570 | Nol10  | 0.0000 | No |
| 38571 | Nol11  | 0.0000 | No |
| 38572 | Nol12  | 0.0000 | No |
| 38573 | Nol3   | 0.0000 | No |
| 38574 | Nol4   | 0.0000 | No |
| 38575 | Nol4l  | 0.0000 | No |
| 38576 | Nol6   | 0.0000 | No |
| 38577 | Nol7   | 0.0000 | No |
| 38578 | Nol8   | 0.0000 | No |
| 38579 | Nol9   | 0.0000 | No |
| 38580 | Nolc1  | 0.0000 | No |
| 38581 | Nom1   | 0.0000 | No |
| 38582 | Nomo1  | 0.0000 | No |
| 38583 | Nono   | 0.0000 | No |
| 38584 | Nop10  | 0.0000 | No |
| 38585 | Nop14  | 0.0000 | No |
| 38586 | Nop16  | 0.0000 | No |
| 38587 | Nop2   | 0.0000 | No |
| 38588 | Nop56  | 0.0000 | No |
| 38589 | Nop58  | 0.0000 | No |
| 38590 | Nop9   | 0.0000 | No |
| 38591 | Nos1   | 0.0000 | No |

|       |          |        |    |
|-------|----------|--------|----|
| 38592 | Nos1ap   | 0.0000 | No |
| 38593 | Nos2     | 0.0000 | No |
| 38594 | Nos3     | 0.0000 | No |
| 38595 | Nosip    | 0.0000 | No |
| 38596 | Nostrin  | 0.0000 | No |
| 38597 | Notch1   | 0.0000 | No |
| 38598 | Notch2   | 0.0000 | No |
| 38599 | Notch3   | 0.0000 | No |
| 38600 | Notch4   | 0.0000 | No |
| 38601 | Noto     | 0.0000 | No |
| 38602 | Notum    | 0.0000 | No |
| 38603 | Notumos  | 0.0000 | No |
| 38604 | Nov      | 0.0000 | No |
| 38605 | Nova1    | 0.0000 | No |
| 38606 | Nova2    | 0.0000 | No |
| 38607 | Nox1     | 0.0000 | No |
| 38608 | Nox3     | 0.0000 | No |
| 38609 | Nox4     | 0.0000 | No |
| 38610 | Noxa1    | 0.0000 | No |
| 38611 | Noxo1    | 0.0000 | No |
| 38612 | Npas1    | 0.0000 | No |
| 38613 | Npas2    | 0.0000 | No |
| 38614 | Npas4    | 0.0000 | No |
| 38615 | Npat     | 0.0000 | No |
| 38616 | Npb      | 0.0000 | No |
| 38617 | Npc1     | 0.0000 | No |
| 38618 | Npc111   | 0.0000 | No |
| 38619 | Npc2     | 0.0000 | No |
| 38620 | Npcd     | 0.0000 | No |
| 38621 | Npdc1    | 0.0000 | No |
| 38622 | Npep11   | 0.0000 | No |
| 38623 | Npepps   | 0.0000 | No |
| 38624 | Npff     | 0.0000 | No |
| 38625 | Npffr1   | 0.0000 | No |
| 38626 | Npffr2   | 0.0000 | No |
| 38627 | Nphp1    | 0.0000 | No |
| 38628 | Nphp3    | 0.0000 | No |
| 38629 | Nphp4    | 0.0000 | No |
| 38630 | Nphs1    | 0.0000 | No |
| 38631 | Nphs2    | 0.0000 | No |
| 38632 | Npl      | 0.0000 | No |
| 38633 | Nploc4   | 0.0000 | No |
| 38634 | Npm1     | 0.0000 | No |
| 38635 | Npm2     | 0.0000 | No |
| 38636 | Npm3     | 0.0000 | No |
| 38637 | Npm3-ps1 | 0.0000 | No |



|       |          |        |    |
|-------|----------|--------|----|
| 38638 | Npn2     | 0.0000 | No |
| 38639 | Npnt     | 0.0000 | No |
| 38640 | Nppa     | 0.0000 | No |
| 38641 | Nppb     | 0.0000 | No |
| 38642 | Nppc     | 0.0000 | No |
| 38643 | Npr1     | 0.0000 | No |
| 38644 | Npr2     | 0.0000 | No |
| 38645 | Npr3     | 0.0000 | No |
| 38646 | Npr12    | 0.0000 | No |
| 38647 | Npr13    | 0.0000 | No |
| 38648 | Nps      | 0.0000 | No |
| 38649 | Nptn     | 0.0000 | No |
| 38650 | Nptx1    | 0.0000 | No |
| 38651 | Nptx2    | 0.0000 | No |
| 38652 | Npvf     | 0.0000 | No |
| 38653 | Npw      | 0.0000 | No |
| 38654 | Npy      | 0.0000 | No |
| 38655 | Npy2r    | 0.0000 | No |
| 38656 | Npy4r    | 0.0000 | No |
| 38657 | Npy5r    | 0.0000 | No |
| 38658 | Nqo1     | 0.0000 | No |
| 38659 | Nqo2     | 0.0000 | No |
| 38660 | Nr0b1    | 0.0000 | No |
| 38661 | Nr0b2    | 0.0000 | No |
| 38662 | Nr1d1    | 0.0000 | No |
| 38663 | Nr1d2    | 0.0000 | No |
| 38664 | Nr1h2    | 0.0000 | No |
| 38665 | Nr1h2-ps | 0.0000 | No |
| 38666 | Nr1h3    | 0.0000 | No |
| 38667 | Nr1h4    | 0.0000 | No |
| 38668 | Nr1h5    | 0.0000 | No |
| 38669 | Nr1i2    | 0.0000 | No |
| 38670 | Nr1i3    | 0.0000 | No |
| 38671 | Nr2c1    | 0.0000 | No |
| 38672 | Nr2c2    | 0.0000 | No |
| 38673 | Nr2c2ap  | 0.0000 | No |
| 38674 | Nr2e1    | 0.0000 | No |
| 38675 | Nr2e3    | 0.0000 | No |
| 38676 | Nr2f1    | 0.0000 | No |
| 38677 | Nr2f2    | 0.0000 | No |
| 38678 | Nr3c1    | 0.0000 | No |
| 38679 | Nr3c2    | 0.0000 | No |
| 38680 | Nr4a1    | 0.0000 | No |
| 38681 | Nr5a1    | 0.0000 | No |
| 38682 | Nr5a1os  | 0.0000 | No |
| 38683 | Nr5a2    | 0.0000 | No |

|       |          |        |    |
|-------|----------|--------|----|
| 38684 | Nr6a1    | 0.0000 | No |
| 38685 | Nr6a1os  | 0.0000 | No |
| 38686 | Nradd    | 0.0000 | No |
| 38687 | Nrap     | 0.0000 | No |
| 38688 | Nrarp    | 0.0000 | No |
| 38689 | Nras     | 0.0000 | No |
| 38690 | Nras-ps2 | 0.0000 | No |
| 38691 | Nrbf2    | 0.0000 | No |
| 38692 | Nrbp1    | 0.0000 | No |
| 38693 | Nrcam    | 0.0000 | No |
| 38694 | Nrd1     | 0.0000 | No |
| 38695 | Nrde2    | 0.0000 | No |
| 38696 | Nrep     | 0.0000 | No |
| 38697 | Nrf1     | 0.0000 | No |
| 38698 | Nrg1     | 0.0000 | No |
| 38699 | Nrg2     | 0.0000 | No |
| 38700 | Nrg3     | 0.0000 | No |
| 38701 | Nrg3os   | 0.0000 | No |
| 38702 | Nrg4     | 0.0000 | No |
| 38703 | Nrgn     | 0.0000 | No |
| 38704 | Nrip1    | 0.0000 | No |
| 38705 | Nrip2    | 0.0000 | No |
| 38706 | Nrip3    | 0.0000 | No |
| 38707 | Nrk      | 0.0000 | No |
| 38708 | Nrl      | 0.0000 | No |
| 38709 | Nrm      | 0.0000 | No |
| 38710 | Nrn1     | 0.0000 | No |
| 38711 | Nrn1l    | 0.0000 | No |
| 38712 | Nron     | 0.0000 | No |
| 38713 | Nrp1     | 0.0000 | No |
| 38714 | Nrros    | 0.0000 | No |
| 38715 | Nrxn1    | 0.0000 | No |
| 38716 | Nrxn2    | 0.0000 | No |
| 38717 | Nrxn3    | 0.0000 | No |
| 38718 | Nsa2     | 0.0000 | No |
| 38719 | Nsa2-ps2 | 0.0000 | No |
| 38720 | Nsd1     | 0.0000 | No |
| 38721 | Nsdhl    | 0.0000 | No |
| 38722 | Nsf      | 0.0000 | No |
| 38723 | Nsfl1c   | 0.0000 | No |
| 38724 | Nsg1     | 0.0000 | No |
| 38725 | Nsg2     | 0.0000 | No |
| 38726 | Nsl1     | 0.0000 | No |
| 38727 | Nsmaf    | 0.0000 | No |
| 38728 | Nsmce1   | 0.0000 | No |
| 38729 | Nsmce2   | 0.0000 | No |

|       |          |        |    |
|-------|----------|--------|----|
| 38730 | Nsmce4a  | 0.0000 | No |
| 38731 | Nsmf     | 0.0000 | No |
| 38732 | Nsrp1    | 0.0000 | No |
| 38733 | Nsun2    | 0.0000 | No |
| 38734 | Nsun3    | 0.0000 | No |
| 38735 | Nsun4    | 0.0000 | No |
| 38736 | Nsun5    | 0.0000 | No |
| 38737 | Nsun6    | 0.0000 | No |
| 38738 | Nsun7    | 0.0000 | No |
| 38739 | Nt5c     | 0.0000 | No |
| 38740 | Nt5c1a   | 0.0000 | No |
| 38741 | Nt5c1b   | 0.0000 | No |
| 38742 | Nt5c2    | 0.0000 | No |
| 38743 | Nt5c3    | 0.0000 | No |
| 38744 | Nt5c3b   | 0.0000 | No |
| 38745 | Nt5dc1   | 0.0000 | No |
| 38746 | Nt5dc2   | 0.0000 | No |
| 38747 | Nt5dc3   | 0.0000 | No |
| 38748 | Nt5e     | 0.0000 | No |
| 38749 | Nt5m     | 0.0000 | No |
| 38750 | Ntan1    | 0.0000 | No |
| 38751 | Ntf3     | 0.0000 | No |
| 38752 | Ntf5     | 0.0000 | No |
| 38753 | Nthl1    | 0.0000 | No |
| 38754 | Ntm      | 0.0000 | No |
| 38755 | Ntmt1    | 0.0000 | No |
| 38756 | Ntn1     | 0.0000 | No |
| 38757 | Ntn4     | 0.0000 | No |
| 38758 | Ntn5     | 0.0000 | No |
| 38759 | Ntng1    | 0.0000 | No |
| 38760 | Ntng2    | 0.0000 | No |
| 38761 | Ntpcr    | 0.0000 | No |
| 38762 | Ntrk1    | 0.0000 | No |
| 38763 | Ntrk2    | 0.0000 | No |
| 38764 | Ntrk3    | 0.0000 | No |
| 38765 | Nts      | 0.0000 | No |
| 38766 | n-TSga9  | 0.0000 | No |
| 38767 | Ntsr1    | 0.0000 | No |
| 38768 | Ntsr2    | 0.0000 | No |
| 38769 | n-TStga1 | 0.0000 | No |
| 38770 | Nuak1    | 0.0000 | No |
| 38771 | Nuak2    | 0.0000 | No |
| 38772 | Nub1     | 0.0000 | No |
| 38773 | Nubp1    | 0.0000 | No |
| 38774 | Nubp2    | 0.0000 | No |
| 38775 | Nubpl    | 0.0000 | No |

|       |          |        |    |
|-------|----------|--------|----|
| 38776 | Nucb1    | 0.0000 | No |
| 38777 | Nucks1   | 0.0000 | No |
| 38778 | Nudc     | 0.0000 | No |
| 38779 | Nudcd1   | 0.0000 | No |
| 38780 | Nudcd2   | 0.0000 | No |
| 38781 | Nudcd3   | 0.0000 | No |
| 38782 | Nudc-ps1 | 0.0000 | No |
| 38783 | Nudt1    | 0.0000 | No |
| 38784 | Nudt10   | 0.0000 | No |
| 38785 | Nudt11   | 0.0000 | No |
| 38786 | Nudt12   | 0.0000 | No |
| 38787 | Nudt12os | 0.0000 | No |
| 38788 | Nudt13   | 0.0000 | No |
| 38789 | Nudt14   | 0.0000 | No |
| 38790 | Nudt15   | 0.0000 | No |
| 38791 | Nudt16   | 0.0000 | No |
| 38792 | Nudt16l1 | 0.0000 | No |
| 38793 | Nudt17   | 0.0000 | No |
| 38794 | Nudt18   | 0.0000 | No |
| 38795 | Nudt19   | 0.0000 | No |
| 38796 | Nudt2    | 0.0000 | No |
| 38797 | Nudt21   | 0.0000 | No |
| 38798 | Nudt22   | 0.0000 | No |
| 38799 | Nudt3    | 0.0000 | No |
| 38800 | Nudt4    | 0.0000 | No |
| 38801 | Nudt5    | 0.0000 | No |
| 38802 | Nudt6    | 0.0000 | No |
| 38803 | Nudt7    | 0.0000 | No |
| 38804 | Nudt8    | 0.0000 | No |
| 38805 | Nudt9    | 0.0000 | No |
| 38806 | Nuf2     | 0.0000 | No |
| 38807 | Nufip1   | 0.0000 | No |
| 38808 | Nufip2   | 0.0000 | No |
| 38809 | Nuggc    | 0.0000 | No |
| 38810 | Numa1    | 0.0000 | No |
| 38811 | Numb     | 0.0000 | No |
| 38812 | Numbl    | 0.0000 | No |
| 38813 | Nup107   | 0.0000 | No |
| 38814 | Nup133   | 0.0000 | No |
| 38815 | Nup153   | 0.0000 | No |
| 38816 | Nup155   | 0.0000 | No |
| 38817 | Nup160   | 0.0000 | No |
| 38818 | Nup188   | 0.0000 | No |
| 38819 | Nup205   | 0.0000 | No |
| 38820 | Nup210   | 0.0000 | No |
| 38821 | Nup210l  | 0.0000 | No |

|       |           |        |    |
|-------|-----------|--------|----|
| 38822 | Nup214    | 0.0000 | No |
| 38823 | Nup35     | 0.0000 | No |
| 38824 | Nup37     | 0.0000 | No |
| 38825 | Nup43     | 0.0000 | No |
| 38826 | Nup50     | 0.0000 | No |
| 38827 | Nup54     | 0.0000 | No |
| 38828 | Nup62     | 0.0000 | No |
| 38829 | Nup62cl   | 0.0000 | No |
| 38830 | Nup85     | 0.0000 | No |
| 38831 | Nup88     | 0.0000 | No |
| 38832 | Nup93     | 0.0000 | No |
| 38833 | Nup98     | 0.0000 | No |
| 38834 | Nupl1     | 0.0000 | No |
| 38835 | Nupl2     | 0.0000 | No |
| 38836 | Nupr1     | 0.0000 | No |
| 38837 | Nupr1l    | 0.0000 | No |
| 38838 | Nus1      | 0.0000 | No |
| 38839 | Nusap1    | 0.0000 | No |
| 38840 | Nutf2     | 0.0000 | No |
| 38841 | Nutf2-ps1 | 0.0000 | No |
| 38842 | Nutf2-ps2 | 0.0000 | No |
| 38843 | Nutm1     | 0.0000 | No |
| 38844 | Nutm2     | 0.0000 | No |
| 38845 | Nvl       | 0.0000 | No |
| 38846 | Nwd1      | 0.0000 | No |
| 38847 | Nwd2      | 0.0000 | No |
| 38848 | Nxf1      | 0.0000 | No |
| 38849 | Nxf2      | 0.0000 | No |
| 38850 | Nxf3      | 0.0000 | No |
| 38851 | Nxf7      | 0.0000 | No |
| 38852 | Nxn       | 0.0000 | No |
| 38853 | Nxn1      | 0.0000 | No |
| 38854 | Nxn2      | 0.0000 | No |
| 38855 | Nxpe1-ps  | 0.0000 | No |
| 38856 | Nxpe2     | 0.0000 | No |
| 38857 | Nxpe3     | 0.0000 | No |
| 38858 | Nxpe4     | 0.0000 | No |
| 38859 | Nxpe5     | 0.0000 | No |
| 38860 | Nxph3     | 0.0000 | No |
| 38861 | Nxph4     | 0.0000 | No |
| 38862 | Nxt1      | 0.0000 | No |
| 38863 | Nxt2      | 0.0000 | No |
| 38864 | Nynrin    | 0.0000 | No |
| 38865 | Nyx       | 0.0000 | No |
| 38866 | Oacyl     | 0.0000 | No |
| 38867 | Oaf       | 0.0000 | No |

|       |            |        |    |
|-------|------------|--------|----|
| 38868 | Oard1      | 0.0000 | No |
| 38869 | Oas1a      | 0.0000 | No |
| 38870 | Oas1b      | 0.0000 | No |
| 38871 | Oas1c      | 0.0000 | No |
| 38872 | Oas1d      | 0.0000 | No |
| 38873 | Oas1e      | 0.0000 | No |
| 38874 | Oas1f      | 0.0000 | No |
| 38875 | Oas1g      | 0.0000 | No |
| 38876 | Oas3       | 0.0000 | No |
| 38877 | Oas11      | 0.0000 | No |
| 38878 | Oas12      | 0.0000 | No |
| 38879 | Oat        | 0.0000 | No |
| 38880 | Oat-rs1    | 0.0000 | No |
| 38881 | Oaz1       | 0.0000 | No |
| 38882 | Oaz1-ps    | 0.0000 | No |
| 38883 | Oaz2       | 0.0000 | No |
| 38884 | Oaz2-ps    | 0.0000 | No |
| 38885 | Oaz3       | 0.0000 | No |
| 38886 | Obox1      | 0.0000 | No |
| 38887 | Obox2      | 0.0000 | No |
| 38888 | Obox3-ps2  | 0.0000 | No |
| 38889 | Obox3-ps3  | 0.0000 | No |
| 38890 | Obox3-ps4  | 0.0000 | No |
| 38891 | Obox3-ps6  | 0.0000 | No |
| 38892 | Obox3-ps7  | 0.0000 | No |
| 38893 | Obox4-ps10 | 0.0000 | No |
| 38894 | Obox4-ps11 | 0.0000 | No |
| 38895 | Obox4-ps12 | 0.0000 | No |
| 38896 | Obox4-ps13 | 0.0000 | No |
| 38897 | Obox4-ps14 | 0.0000 | No |
| 38898 | Obox4-ps15 | 0.0000 | No |
| 38899 | Obox4-ps16 | 0.0000 | No |
| 38900 | Obox4-ps17 | 0.0000 | No |
| 38901 | Obox4-ps18 | 0.0000 | No |
| 38902 | Obox4-ps19 | 0.0000 | No |
| 38903 | Obox4-ps2  | 0.0000 | No |
| 38904 | Obox4-ps20 | 0.0000 | No |
| 38905 | Obox4-ps21 | 0.0000 | No |
| 38906 | Obox4-ps22 | 0.0000 | No |
| 38907 | Obox4-ps23 | 0.0000 | No |
| 38908 | Obox4-ps24 | 0.0000 | No |
| 38909 | Obox4-ps25 | 0.0000 | No |
| 38910 | Obox4-ps26 | 0.0000 | No |
| 38911 | Obox4-ps27 | 0.0000 | No |
| 38912 | Obox4-ps28 | 0.0000 | No |
| 38913 | Obox4-ps29 | 0.0000 | No |

|       |            |        |    |
|-------|------------|--------|----|
| 38914 | Obox4-ps31 | 0.0000 | No |
| 38915 | Obox4-ps32 | 0.0000 | No |
| 38916 | Obox4-ps33 | 0.0000 | No |
| 38917 | Obox4-ps34 | 0.0000 | No |
| 38918 | Obox4-ps35 | 0.0000 | No |
| 38919 | Obox4-ps37 | 0.0000 | No |
| 38920 | Obox4-ps38 | 0.0000 | No |
| 38921 | Obox4-ps39 | 0.0000 | No |
| 38922 | Obox4-ps4  | 0.0000 | No |
| 38923 | Obox4-ps5  | 0.0000 | No |
| 38924 | Obox4-ps6  | 0.0000 | No |
| 38925 | Obox4-ps7  | 0.0000 | No |
| 38926 | Obox4-ps8  | 0.0000 | No |
| 38927 | Obox4-ps9  | 0.0000 | No |
| 38928 | Obox5      | 0.0000 | No |
| 38929 | Obox6-ps1  | 0.0000 | No |
| 38930 | Obox7      | 0.0000 | No |
| 38931 | Obox8      | 0.0000 | No |
| 38932 | Obp1a      | 0.0000 | No |
| 38933 | Obp1b      | 0.0000 | No |
| 38934 | Obp2a      | 0.0000 | No |
| 38935 | Obscn      | 0.0000 | No |
| 38936 | Obsl1      | 0.0000 | No |
| 38937 | Oc90       | 0.0000 | No |
| 38938 | Oca2       | 0.0000 | No |
| 38939 | Ocel1      | 0.0000 | No |
| 38940 | Ociad1     | 0.0000 | No |
| 38941 | Ociad2     | 0.0000 | No |
| 38942 | Ocln       | 0.0000 | No |
| 38943 | Ocm        | 0.0000 | No |
| 38944 | Ocrl       | 0.0000 | No |
| 38945 | Ocstamp    | 0.0000 | No |
| 38946 | Odam       | 0.0000 | No |
| 38947 | Odc1       | 0.0000 | No |
| 38948 | Odf2       | 0.0000 | No |
| 38949 | Odf2l      | 0.0000 | No |
| 38950 | Odf3b      | 0.0000 | No |
| 38951 | Odf4       | 0.0000 | No |
| 38952 | Ofcc1      | 0.0000 | No |
| 38953 | Ofd1       | 0.0000 | No |
| 38954 | Ogdh       | 0.0000 | No |
| 38955 | Ogdhl      | 0.0000 | No |
| 38956 | Ogfod1     | 0.0000 | No |
| 38957 | Ogfod2     | 0.0000 | No |
| 38958 | Ogfod3     | 0.0000 | No |
| 38959 | Ogfr       | 0.0000 | No |

|       |              |        |    |
|-------|--------------|--------|----|
| 38960 | Ogfr11       | 0.0000 | No |
| 38961 | Ogg1         | 0.0000 | No |
| 38962 | Ogn          | 0.0000 | No |
| 38963 | Ogt          | 0.0000 | No |
| 38964 | Oip5         | 0.0000 | No |
| 38965 | Oit3         | 0.0000 | No |
| 38966 | Ola1         | 0.0000 | No |
| 38967 | Olah         | 0.0000 | No |
| 38968 | Olfr1        | 0.0000 | No |
| 38969 | Olfr2        | 0.0000 | No |
| 38970 | Olfr3        | 0.0000 | No |
| 38971 | Olfr4        | 0.0000 | No |
| 38972 | Olfr5        | 0.0000 | No |
| 38973 | Olfr6        | 0.0000 | No |
| 38974 | Olfr7        | 0.0000 | No |
| 38975 | Olfr8        | 0.0000 | No |
| 38976 | Olfr9        | 0.0000 | No |
| 38977 | Olfr10       | 0.0000 | No |
| 38978 | Olfr1000     | 0.0000 | No |
| 38979 | Olfr1001-ps1 | 0.0000 | No |
| 38980 | Olfr1002     | 0.0000 | No |
| 38981 | Olfr1003-ps1 | 0.0000 | No |
| 38982 | Olfr1004-ps1 | 0.0000 | No |
| 38983 | Olfr1005-ps1 | 0.0000 | No |
| 38984 | Olfr1006     | 0.0000 | No |
| 38985 | Olfr1007-ps1 | 0.0000 | No |
| 38986 | Olfr1009     | 0.0000 | No |
| 38987 | Olfr101      | 0.0000 | No |
| 38988 | Olfr1010     | 0.0000 | No |
| 38989 | Olfr1012     | 0.0000 | No |
| 38990 | Olfr1013     | 0.0000 | No |
| 38991 | Olfr1014     | 0.0000 | No |
| 38992 | Olfr1016     | 0.0000 | No |
| 38993 | Olfr1018     | 0.0000 | No |
| 38994 | Olfr1019     | 0.0000 | No |
| 38995 | Olfr102      | 0.0000 | No |
| 38996 | Olfr1020     | 0.0000 | No |
| 38997 | Olfr1021-ps1 | 0.0000 | No |
| 38998 | Olfr1022     | 0.0000 | No |
| 38999 | Olfr1023     | 0.0000 | No |
| 39000 | Olfr1024     | 0.0000 | No |
| 39001 | Olfr1025-ps1 | 0.0000 | No |
| 39002 | Olfr1026     | 0.0000 | No |
| 39003 | Olfr1027-ps1 | 0.0000 | No |
| 39004 | Olfr1028     | 0.0000 | No |
| 39005 | Olfr1029     | 0.0000 | No |



|       |              |        |    |
|-------|--------------|--------|----|
| 39006 | Olfr103      | 0.0000 | No |
| 39007 | Olfr1030     | 0.0000 | No |
| 39008 | Olfr1032     | 0.0000 | No |
| 39009 | Olfr1033     | 0.0000 | No |
| 39010 | Olfr1034     | 0.0000 | No |
| 39011 | Olfr1035-ps1 | 0.0000 | No |
| 39012 | Olfr1036     | 0.0000 | No |
| 39013 | Olfr1037     | 0.0000 | No |
| 39014 | Olfr1038-ps  | 0.0000 | No |
| 39015 | Olfr1040     | 0.0000 | No |
| 39016 | Olfr1041-ps1 | 0.0000 | No |
| 39017 | Olfr1043     | 0.0000 | No |
| 39018 | Olfr1045     | 0.0000 | No |
| 39019 | Olfr1046     | 0.0000 | No |
| 39020 | Olfr1047     | 0.0000 | No |
| 39021 | Olfr1049     | 0.0000 | No |
| 39022 | Olfr104-ps   | 0.0000 | No |
| 39023 | Olfr1050-ps1 | 0.0000 | No |
| 39024 | Olfr1051     | 0.0000 | No |
| 39025 | Olfr1052     | 0.0000 | No |
| 39026 | Olfr1053     | 0.0000 | No |
| 39027 | Olfr1054     | 0.0000 | No |
| 39028 | Olfr1055     | 0.0000 | No |
| 39029 | Olfr1056     | 0.0000 | No |
| 39030 | Olfr1057     | 0.0000 | No |
| 39031 | Olfr1058     | 0.0000 | No |
| 39032 | Olfr1059-ps1 | 0.0000 | No |
| 39033 | Olfr105-ps   | 0.0000 | No |
| 39034 | Olfr1060-ps1 | 0.0000 | No |
| 39035 | Olfr1061     | 0.0000 | No |
| 39036 | Olfr1062     | 0.0000 | No |
| 39037 | Olfr1063-ps1 | 0.0000 | No |
| 39038 | Olfr1064-ps1 | 0.0000 | No |
| 39039 | Olfr1065     | 0.0000 | No |
| 39040 | Olfr1066     | 0.0000 | No |
| 39041 | Olfr1069-ps1 | 0.0000 | No |
| 39042 | Olfr106-ps   | 0.0000 | No |
| 39043 | Olfr107      | 0.0000 | No |
| 39044 | Olfr1070-ps1 | 0.0000 | No |
| 39045 | Olfr1075-ps1 | 0.0000 | No |
| 39046 | Olfr1077-ps1 | 0.0000 | No |
| 39047 | Olfr1078-ps1 | 0.0000 | No |
| 39048 | Olfr1079     | 0.0000 | No |
| 39049 | Olfr108      | 0.0000 | No |
| 39050 | Olfr1080     | 0.0000 | No |
| 39051 | Olfr1081-ps1 | 0.0000 | No |

|       |              |        |    |
|-------|--------------|--------|----|
| 39052 | Olfr1082     | 0.0000 | No |
| 39053 | Olfr1083-ps  | 0.0000 | No |
| 39054 | Olfr1084     | 0.0000 | No |
| 39055 | Olfr1085     | 0.0000 | No |
| 39056 | Olfr1086     | 0.0000 | No |
| 39057 | Olfr1087     | 0.0000 | No |
| 39058 | Olfr1088-ps1 | 0.0000 | No |
| 39059 | Olfr1089     | 0.0000 | No |
| 39060 | Olfr109      | 0.0000 | No |
| 39061 | Olfr1091-ps1 | 0.0000 | No |
| 39062 | Olfr1092-ps1 | 0.0000 | No |
| 39063 | Olfr1094     | 0.0000 | No |
| 39064 | Olfr1095     | 0.0000 | No |
| 39065 | Olfr1097     | 0.0000 | No |
| 39066 | Olfr1098     | 0.0000 | No |
| 39067 | Olfr1099     | 0.0000 | No |
| 39068 | Olfr11       | 0.0000 | No |
| 39069 | Olfr1100     | 0.0000 | No |
| 39070 | Olfr1101     | 0.0000 | No |
| 39071 | Olfr1102     | 0.0000 | No |
| 39072 | Olfr1103-ps1 | 0.0000 | No |
| 39073 | Olfr1104     | 0.0000 | No |
| 39074 | Olfr1105     | 0.0000 | No |
| 39075 | Olfr1106     | 0.0000 | No |
| 39076 | Olfr1107     | 0.0000 | No |
| 39077 | Olfr1109     | 0.0000 | No |
| 39078 | Olfr111      | 0.0000 | No |
| 39079 | Olfr1110     | 0.0000 | No |
| 39080 | Olfr1111     | 0.0000 | No |
| 39081 | Olfr1112     | 0.0000 | No |
| 39082 | Olfr1113     | 0.0000 | No |
| 39083 | Olfr1114-ps1 | 0.0000 | No |
| 39084 | Olfr1115     | 0.0000 | No |
| 39085 | Olfr1117-ps1 | 0.0000 | No |
| 39086 | Olfr1118     | 0.0000 | No |
| 39087 | Olfr1119-ps1 | 0.0000 | No |
| 39088 | Olfr112      | 0.0000 | No |
| 39089 | Olfr1120     | 0.0000 | No |
| 39090 | Olfr1121     | 0.0000 | No |
| 39091 | Olfr1122     | 0.0000 | No |
| 39092 | Olfr1123     | 0.0000 | No |
| 39093 | Olfr1124     | 0.0000 | No |
| 39094 | Olfr1126     | 0.0000 | No |
| 39095 | Olfr1127-ps1 | 0.0000 | No |
| 39096 | Olfr1128     | 0.0000 | No |
| 39097 | Olfr1130     | 0.0000 | No |

|       |              |        |    |
|-------|--------------|--------|----|
| 39098 | Olfr1132     | 0.0000 | No |
| 39099 | Olfr1133     | 0.0000 | No |
| 39100 | Olfr1134     | 0.0000 | No |
| 39101 | Olfr1135     | 0.0000 | No |
| 39102 | Olfr1136     | 0.0000 | No |
| 39103 | Olfr1137     | 0.0000 | No |
| 39104 | Olfr1138     | 0.0000 | No |
| 39105 | Olfr1139-ps1 | 0.0000 | No |
| 39106 | Olfr114      | 0.0000 | No |
| 39107 | Olfr1140     | 0.0000 | No |
| 39108 | Olfr1141     | 0.0000 | No |
| 39109 | Olfr1142-ps1 | 0.0000 | No |
| 39110 | Olfr1143     | 0.0000 | No |
| 39111 | Olfr1144-ps1 | 0.0000 | No |
| 39112 | Olfr1145     | 0.0000 | No |
| 39113 | Olfr1146-ps1 | 0.0000 | No |
| 39114 | Olfr1147-ps1 | 0.0000 | No |
| 39115 | Olfr1149-ps1 | 0.0000 | No |
| 39116 | Olfr115      | 0.0000 | No |
| 39117 | Olfr1150-ps1 | 0.0000 | No |
| 39118 | Olfr1151     | 0.0000 | No |
| 39119 | Olfr1153     | 0.0000 | No |
| 39120 | Olfr1154     | 0.0000 | No |
| 39121 | Olfr1155     | 0.0000 | No |
| 39122 | Olfr1156     | 0.0000 | No |
| 39123 | Olfr1158     | 0.0000 | No |
| 39124 | Olfr116      | 0.0000 | No |
| 39125 | Olfr1163     | 0.0000 | No |
| 39126 | Olfr1164     | 0.0000 | No |
| 39127 | Olfr1165-ps  | 0.0000 | No |
| 39128 | Olfr1167     | 0.0000 | No |
| 39129 | Olfr1168     | 0.0000 | No |
| 39130 | Olfr1169-ps1 | 0.0000 | No |
| 39131 | Olfr117      | 0.0000 | No |
| 39132 | Olfr1170     | 0.0000 | No |
| 39133 | Olfr1171-ps1 | 0.0000 | No |
| 39134 | Olfr1172-ps1 | 0.0000 | No |
| 39135 | Olfr1173     | 0.0000 | No |
| 39136 | Olfr1174-ps  | 0.0000 | No |
| 39137 | Olfr1175-ps  | 0.0000 | No |
| 39138 | Olfr1176     | 0.0000 | No |
| 39139 | Olfr1177-ps  | 0.0000 | No |
| 39140 | Olfr1178     | 0.0000 | No |
| 39141 | Olfr1179     | 0.0000 | No |
| 39142 | Olfr118      | 0.0000 | No |
| 39143 | Olfr1180     | 0.0000 | No |

|       |              |        |    |
|-------|--------------|--------|----|
| 39144 | Olfr1181     | 0.0000 | No |
| 39145 | Olfr1184     | 0.0000 | No |
| 39146 | Olfr1185-ps1 | 0.0000 | No |
| 39147 | Olfr1186     | 0.0000 | No |
| 39148 | Olfr1188     | 0.0000 | No |
| 39149 | Olfr1189     | 0.0000 | No |
| 39150 | Olfr119      | 0.0000 | No |
| 39151 | Olfr1191-ps1 | 0.0000 | No |
| 39152 | Olfr1192-ps1 | 0.0000 | No |
| 39153 | Olfr1193     | 0.0000 | No |
| 39154 | Olfr1195     | 0.0000 | No |
| 39155 | Olfr1196     | 0.0000 | No |
| 39156 | Olfr1197     | 0.0000 | No |
| 39157 | Olfr1198     | 0.0000 | No |
| 39158 | Olfr1199     | 0.0000 | No |
| 39159 | Olfr12       | 0.0000 | No |
| 39160 | Olfr120      | 0.0000 | No |
| 39161 | Olfr1200     | 0.0000 | No |
| 39162 | Olfr1201     | 0.0000 | No |
| 39163 | Olfr1202     | 0.0000 | No |
| 39164 | Olfr1204     | 0.0000 | No |
| 39165 | Olfr1205     | 0.0000 | No |
| 39166 | Olfr1206     | 0.0000 | No |
| 39167 | Olfr1208     | 0.0000 | No |
| 39168 | Olfr121      | 0.0000 | No |
| 39169 | Olfr1211     | 0.0000 | No |
| 39170 | Olfr1212     | 0.0000 | No |
| 39171 | Olfr1214     | 0.0000 | No |
| 39172 | Olfr1215     | 0.0000 | No |
| 39173 | Olfr1216     | 0.0000 | No |
| 39174 | Olfr1217     | 0.0000 | No |
| 39175 | Olfr1218     | 0.0000 | No |
| 39176 | Olfr122      | 0.0000 | No |
| 39177 | Olfr1220     | 0.0000 | No |
| 39178 | Olfr1221     | 0.0000 | No |
| 39179 | Olfr1222     | 0.0000 | No |
| 39180 | Olfr1223     | 0.0000 | No |
| 39181 | Olfr1224-ps1 | 0.0000 | No |
| 39182 | Olfr1225     | 0.0000 | No |
| 39183 | Olfr1226     | 0.0000 | No |
| 39184 | Olfr1227-ps1 | 0.0000 | No |
| 39185 | Olfr1229     | 0.0000 | No |
| 39186 | Olfr1230     | 0.0000 | No |
| 39187 | Olfr1231     | 0.0000 | No |
| 39188 | Olfr1233     | 0.0000 | No |
| 39189 | Olfr1234     | 0.0000 | No |

|       |              |        |    |
|-------|--------------|--------|----|
| 39190 | Olfr1235-ps1 | 0.0000 | No |
| 39191 | Olfr1236-ps1 | 0.0000 | No |
| 39192 | Olfr1238     | 0.0000 | No |
| 39193 | Olfr1239     | 0.0000 | No |
| 39194 | Olfr124      | 0.0000 | No |
| 39195 | Olfr1240     | 0.0000 | No |
| 39196 | Olfr1241     | 0.0000 | No |
| 39197 | Olfr1242     | 0.0000 | No |
| 39198 | Olfr1243     | 0.0000 | No |
| 39199 | Olfr1244-ps1 | 0.0000 | No |
| 39200 | Olfr1246     | 0.0000 | No |
| 39201 | Olfr1247     | 0.0000 | No |
| 39202 | Olfr1248     | 0.0000 | No |
| 39203 | Olfr1249     | 0.0000 | No |
| 39204 | Olfr125      | 0.0000 | No |
| 39205 | Olfr1251     | 0.0000 | No |
| 39206 | Olfr1252     | 0.0000 | No |
| 39207 | Olfr1253     | 0.0000 | No |
| 39208 | Olfr1254     | 0.0000 | No |
| 39209 | Olfr1255     | 0.0000 | No |
| 39210 | Olfr1256     | 0.0000 | No |
| 39211 | Olfr1258     | 0.0000 | No |
| 39212 | Olfr1259     | 0.0000 | No |
| 39213 | Olfr126      | 0.0000 | No |
| 39214 | Olfr1261     | 0.0000 | No |
| 39215 | Olfr1262     | 0.0000 | No |
| 39216 | Olfr1263     | 0.0000 | No |
| 39217 | Olfr1265     | 0.0000 | No |
| 39218 | Olfr1266-ps1 | 0.0000 | No |
| 39219 | Olfr1267-ps1 | 0.0000 | No |
| 39220 | Olfr1268-ps1 | 0.0000 | No |
| 39221 | Olfr1269     | 0.0000 | No |
| 39222 | Olfr127      | 0.0000 | No |
| 39223 | Olfr1270     | 0.0000 | No |
| 39224 | Olfr1271     | 0.0000 | No |
| 39225 | Olfr1272     | 0.0000 | No |
| 39226 | Olfr1273-ps  | 0.0000 | No |
| 39227 | Olfr1274-ps  | 0.0000 | No |
| 39228 | Olfr1276     | 0.0000 | No |
| 39229 | Olfr1278     | 0.0000 | No |
| 39230 | Olfr1279     | 0.0000 | No |
| 39231 | Olfr128      | 0.0000 | No |
| 39232 | Olfr1280     | 0.0000 | No |
| 39233 | Olfr1281     | 0.0000 | No |
| 39234 | Olfr1282     | 0.0000 | No |
| 39235 | Olfr1283     | 0.0000 | No |

|       |              |        |    |
|-------|--------------|--------|----|
| 39236 | Olfr1285     | 0.0000 | No |
| 39237 | Olfr1286     | 0.0000 | No |
| 39238 | Olfr1287     | 0.0000 | No |
| 39239 | Olfr1288     | 0.0000 | No |
| 39240 | Olfr1289     | 0.0000 | No |
| 39241 | Olfr129      | 0.0000 | No |
| 39242 | Olfr1291-ps1 | 0.0000 | No |
| 39243 | Olfr1293-ps  | 0.0000 | No |
| 39244 | Olfr1294     | 0.0000 | No |
| 39245 | Olfr1295     | 0.0000 | No |
| 39246 | Olfr1297     | 0.0000 | No |
| 39247 | Olfr1298     | 0.0000 | No |
| 39248 | Olfr1299     | 0.0000 | No |
| 39249 | Olfr13       | 0.0000 | No |
| 39250 | Olfr1300-ps1 | 0.0000 | No |
| 39251 | Olfr1301     | 0.0000 | No |
| 39252 | Olfr1302     | 0.0000 | No |
| 39253 | Olfr1303     | 0.0000 | No |
| 39254 | Olfr1304-ps1 | 0.0000 | No |
| 39255 | Olfr1305     | 0.0000 | No |
| 39256 | Olfr1306     | 0.0000 | No |
| 39257 | Olfr1308     | 0.0000 | No |
| 39258 | Olfr1309     | 0.0000 | No |
| 39259 | Olfr131      | 0.0000 | No |
| 39260 | Olfr1310     | 0.0000 | No |
| 39261 | Olfr1312     | 0.0000 | No |
| 39262 | Olfr1313     | 0.0000 | No |
| 39263 | Olfr1314     | 0.0000 | No |
| 39264 | Olfr1315-ps1 | 0.0000 | No |
| 39265 | Olfr1316     | 0.0000 | No |
| 39266 | Olfr1317     | 0.0000 | No |
| 39267 | Olfr1318     | 0.0000 | No |
| 39268 | Olfr1319-ps1 | 0.0000 | No |
| 39269 | Olfr132      | 0.0000 | No |
| 39270 | Olfr1321     | 0.0000 | No |
| 39271 | Olfr1322     | 0.0000 | No |
| 39272 | Olfr1324     | 0.0000 | No |
| 39273 | Olfr1325     | 0.0000 | No |
| 39274 | Olfr1326-ps1 | 0.0000 | No |
| 39275 | Olfr1328     | 0.0000 | No |
| 39276 | Olfr1330     | 0.0000 | No |
| 39277 | Olfr1331     | 0.0000 | No |
| 39278 | Olfr1332-ps1 | 0.0000 | No |
| 39279 | Olfr1335     | 0.0000 | No |
| 39280 | Olfr1336     | 0.0000 | No |
| 39281 | Olfr1337     | 0.0000 | No |

|       |              |        |    |
|-------|--------------|--------|----|
| 39282 | Olfr1338     | 0.0000 | No |
| 39283 | Olfr1339     | 0.0000 | No |
| 39284 | Olfr134      | 0.0000 | No |
| 39285 | Olfr1340     | 0.0000 | No |
| 39286 | Olfr1344     | 0.0000 | No |
| 39287 | Olfr1345-ps1 | 0.0000 | No |
| 39288 | Olfr1346     | 0.0000 | No |
| 39289 | Olfr1348     | 0.0000 | No |
| 39290 | Olfr1349     | 0.0000 | No |
| 39291 | Olfr135      | 0.0000 | No |
| 39292 | Olfr1350     | 0.0000 | No |
| 39293 | Olfr1351     | 0.0000 | No |
| 39294 | Olfr1352     | 0.0000 | No |
| 39295 | Olfr1353     | 0.0000 | No |
| 39296 | Olfr1354     | 0.0000 | No |
| 39297 | Olfr1355     | 0.0000 | No |
| 39298 | Olfr1356     | 0.0000 | No |
| 39299 | Olfr1358     | 0.0000 | No |
| 39300 | Olfr1359     | 0.0000 | No |
| 39301 | Olfr136      | 0.0000 | No |
| 39302 | Olfr1360     | 0.0000 | No |
| 39303 | Olfr1361     | 0.0000 | No |
| 39304 | Olfr1362     | 0.0000 | No |
| 39305 | Olfr1364     | 0.0000 | No |
| 39306 | Olfr1366     | 0.0000 | No |
| 39307 | Olfr1367     | 0.0000 | No |
| 39308 | Olfr1368     | 0.0000 | No |
| 39309 | Olfr1369-ps1 | 0.0000 | No |
| 39310 | Olfr1370     | 0.0000 | No |
| 39311 | Olfr1371     | 0.0000 | No |
| 39312 | Olfr1372-ps1 | 0.0000 | No |
| 39313 | Olfr1373     | 0.0000 | No |
| 39314 | Olfr1374-ps1 | 0.0000 | No |
| 39315 | Olfr1376-ps1 | 0.0000 | No |
| 39316 | Olfr1377     | 0.0000 | No |
| 39317 | Olfr1378     | 0.0000 | No |
| 39318 | Olfr1379-ps1 | 0.0000 | No |
| 39319 | Olfr1380     | 0.0000 | No |
| 39320 | Olfr1381     | 0.0000 | No |
| 39321 | Olfr1382     | 0.0000 | No |
| 39322 | Olfr1383     | 0.0000 | No |
| 39323 | Olfr1384     | 0.0000 | No |
| 39324 | Olfr1385     | 0.0000 | No |
| 39325 | Olfr1386     | 0.0000 | No |
| 39326 | Olfr1388     | 0.0000 | No |
| 39327 | Olfr139      | 0.0000 | No |

|       |              |        |    |
|-------|--------------|--------|----|
| 39328 | Olfr1390     | 0.0000 | No |
| 39329 | Olfr1391     | 0.0000 | No |
| 39330 | Olfr1392     | 0.0000 | No |
| 39331 | Olfr1393     | 0.0000 | No |
| 39332 | Olfr1394     | 0.0000 | No |
| 39333 | Olfr1396     | 0.0000 | No |
| 39334 | Olfr1397-ps1 | 0.0000 | No |
| 39335 | Olfr140      | 0.0000 | No |
| 39336 | Olfr1400-ps1 | 0.0000 | No |
| 39337 | Olfr1401-ps1 | 0.0000 | No |
| 39338 | Olfr1402     | 0.0000 | No |
| 39339 | Olfr1404     | 0.0000 | No |
| 39340 | Olfr1406     | 0.0000 | No |
| 39341 | Olfr1407-ps1 | 0.0000 | No |
| 39342 | Olfr1408     | 0.0000 | No |
| 39343 | Olfr1409-ps1 | 0.0000 | No |
| 39344 | Olfr141      | 0.0000 | No |
| 39345 | Olfr1410     | 0.0000 | No |
| 39346 | Olfr1411     | 0.0000 | No |
| 39347 | Olfr1412     | 0.0000 | No |
| 39348 | Olfr1413     | 0.0000 | No |
| 39349 | Olfr1414     | 0.0000 | No |
| 39350 | Olfr1415     | 0.0000 | No |
| 39351 | Olfr1416     | 0.0000 | No |
| 39352 | Olfr1417     | 0.0000 | No |
| 39353 | Olfr1418     | 0.0000 | No |
| 39354 | Olfr142      | 0.0000 | No |
| 39355 | Olfr1421-ps1 | 0.0000 | No |
| 39356 | Olfr1423     | 0.0000 | No |
| 39357 | Olfr1424     | 0.0000 | No |
| 39358 | Olfr1427     | 0.0000 | No |
| 39359 | Olfr1428     | 0.0000 | No |
| 39360 | Olfr143      | 0.0000 | No |
| 39361 | Olfr1430-ps1 | 0.0000 | No |
| 39362 | Olfr1431     | 0.0000 | No |
| 39363 | Olfr1432     | 0.0000 | No |
| 39364 | Olfr1434     | 0.0000 | No |
| 39365 | Olfr1435-ps1 | 0.0000 | No |
| 39366 | Olfr1436     | 0.0000 | No |
| 39367 | Olfr1437     | 0.0000 | No |
| 39368 | Olfr1439-ps1 | 0.0000 | No |
| 39369 | Olfr1440     | 0.0000 | No |
| 39370 | Olfr1441     | 0.0000 | No |
| 39371 | Olfr1442     | 0.0000 | No |
| 39372 | Olfr1443     | 0.0000 | No |
| 39373 | Olfr1444     | 0.0000 | No |



|       |              |        |    |
|-------|--------------|--------|----|
| 39374 | Olfr1445     | 0.0000 | No |
| 39375 | Olfr1446     | 0.0000 | No |
| 39376 | Olfr1447     | 0.0000 | No |
| 39377 | Olfr1448     | 0.0000 | No |
| 39378 | Olfr1449     | 0.0000 | No |
| 39379 | Olfr145      | 0.0000 | No |
| 39380 | Olfr1451     | 0.0000 | No |
| 39381 | Olfr1452-ps1 | 0.0000 | No |
| 39382 | Olfr1454     | 0.0000 | No |
| 39383 | Olfr1455-ps1 | 0.0000 | No |
| 39384 | Olfr1456-ps1 | 0.0000 | No |
| 39385 | Olfr1457     | 0.0000 | No |
| 39386 | Olfr1458     | 0.0000 | No |
| 39387 | Olfr1459     | 0.0000 | No |
| 39388 | Olfr146      | 0.0000 | No |
| 39389 | Olfr1460-ps1 | 0.0000 | No |
| 39390 | Olfr1461     | 0.0000 | No |
| 39391 | Olfr1462     | 0.0000 | No |
| 39392 | Olfr1464-ps1 | 0.0000 | No |
| 39393 | Olfr1465     | 0.0000 | No |
| 39394 | Olfr1466     | 0.0000 | No |
| 39395 | Olfr1467     | 0.0000 | No |
| 39396 | Olfr1468-ps1 | 0.0000 | No |
| 39397 | Olfr1469     | 0.0000 | No |
| 39398 | Olfr147      | 0.0000 | No |
| 39399 | Olfr1470-ps1 | 0.0000 | No |
| 39400 | Olfr1471     | 0.0000 | No |
| 39401 | Olfr1473-ps1 | 0.0000 | No |
| 39402 | Olfr1474     | 0.0000 | No |
| 39403 | Olfr1475     | 0.0000 | No |
| 39404 | Olfr1476-ps1 | 0.0000 | No |
| 39405 | Olfr1477     | 0.0000 | No |
| 39406 | Olfr1478-ps1 | 0.0000 | No |
| 39407 | Olfr1479-ps1 | 0.0000 | No |
| 39408 | Olfr148      | 0.0000 | No |
| 39409 | Olfr1480     | 0.0000 | No |
| 39410 | Olfr1481-ps1 | 0.0000 | No |
| 39411 | Olfr1482-ps1 | 0.0000 | No |
| 39412 | Olfr1484     | 0.0000 | No |
| 39413 | Olfr1485-ps1 | 0.0000 | No |
| 39414 | Olfr1486-ps1 | 0.0000 | No |
| 39415 | Olfr1487     | 0.0000 | No |
| 39416 | Olfr1488-ps1 | 0.0000 | No |
| 39417 | Olfr1489     | 0.0000 | No |
| 39418 | Olfr149      | 0.0000 | No |
| 39419 | Olfr1490     | 0.0000 | No |

|       |              |        |    |
|-------|--------------|--------|----|
| 39420 | Olfr1491     | 0.0000 | No |
| 39421 | Olfr1493-ps1 | 0.0000 | No |
| 39422 | Olfr1494     | 0.0000 | No |
| 39423 | Olfr1495     | 0.0000 | No |
| 39424 | Olfr1496     | 0.0000 | No |
| 39425 | Olfr1498-ps1 | 0.0000 | No |
| 39426 | Olfr1499     | 0.0000 | No |
| 39427 | Olfr150      | 0.0000 | No |
| 39428 | Olfr1500     | 0.0000 | No |
| 39429 | Olfr1501     | 0.0000 | No |
| 39430 | Olfr1502     | 0.0000 | No |
| 39431 | Olfr1504     | 0.0000 | No |
| 39432 | Olfr1506     | 0.0000 | No |
| 39433 | Olfr1508     | 0.0000 | No |
| 39434 | Olfr1509     | 0.0000 | No |
| 39435 | Olfr151      | 0.0000 | No |
| 39436 | Olfr1510     | 0.0000 | No |
| 39437 | Olfr1511     | 0.0000 | No |
| 39438 | Olfr1512     | 0.0000 | No |
| 39439 | Olfr1513     | 0.0000 | No |
| 39440 | Olfr152      | 0.0000 | No |
| 39441 | Olfr1527-ps1 | 0.0000 | No |
| 39442 | Olfr153      | 0.0000 | No |
| 39443 | Olfr1532-ps1 | 0.0000 | No |
| 39444 | Olfr154      | 0.0000 | No |
| 39445 | Olfr1542-ps1 | 0.0000 | No |
| 39446 | Olfr1543-ps1 | 0.0000 | No |
| 39447 | Olfr1545-ps1 | 0.0000 | No |
| 39448 | Olfr155      | 0.0000 | No |
| 39449 | Olfr1556-ps1 | 0.0000 | No |
| 39450 | Olfr156      | 0.0000 | No |
| 39451 | Olfr157      | 0.0000 | No |
| 39452 | Olfr159      | 0.0000 | No |
| 39453 | Olfr16       | 0.0000 | No |
| 39454 | Olfr160      | 0.0000 | No |
| 39455 | Olfr161      | 0.0000 | No |
| 39456 | Olfr162-ps1  | 0.0000 | No |
| 39457 | Olfr163-ps1  | 0.0000 | No |
| 39458 | Olfr164      | 0.0000 | No |
| 39459 | Olfr165      | 0.0000 | No |
| 39460 | Olfr166      | 0.0000 | No |
| 39461 | Olfr167      | 0.0000 | No |
| 39462 | Olfr168      | 0.0000 | No |
| 39463 | Olfr169      | 0.0000 | No |
| 39464 | Olfr17       | 0.0000 | No |
| 39465 | Olfr170      | 0.0000 | No |

|       |             |        |    |
|-------|-------------|--------|----|
| 39466 | Olfr171     | 0.0000 | No |
| 39467 | Olfr173     | 0.0000 | No |
| 39468 | Olfr175-ps1 | 0.0000 | No |
| 39469 | Olfr177     | 0.0000 | No |
| 39470 | Olfr18      | 0.0000 | No |
| 39471 | Olfr183     | 0.0000 | No |
| 39472 | Olfr184-ps1 | 0.0000 | No |
| 39473 | Olfr185-ps1 | 0.0000 | No |
| 39474 | Olfr186     | 0.0000 | No |
| 39475 | Olfr187     | 0.0000 | No |
| 39476 | Olfr188-ps1 | 0.0000 | No |
| 39477 | Olfr189-ps1 | 0.0000 | No |
| 39478 | Olfr190     | 0.0000 | No |
| 39479 | Olfr191     | 0.0000 | No |
| 39480 | Olfr192     | 0.0000 | No |
| 39481 | Olfr193     | 0.0000 | No |
| 39482 | Olfr195     | 0.0000 | No |
| 39483 | Olfr196     | 0.0000 | No |
| 39484 | Olfr198     | 0.0000 | No |
| 39485 | Olfr199     | 0.0000 | No |
| 39486 | Olfr2       | 0.0000 | No |
| 39487 | Olfr201     | 0.0000 | No |
| 39488 | Olfr202     | 0.0000 | No |
| 39489 | Olfr203     | 0.0000 | No |
| 39490 | Olfr206     | 0.0000 | No |
| 39491 | Olfr211     | 0.0000 | No |
| 39492 | Olfr212     | 0.0000 | No |
| 39493 | Olfr213     | 0.0000 | No |
| 39494 | Olfr214     | 0.0000 | No |
| 39495 | Olfr215     | 0.0000 | No |
| 39496 | Olfr218     | 0.0000 | No |
| 39497 | Olfr220     | 0.0000 | No |
| 39498 | Olfr221     | 0.0000 | No |
| 39499 | Olfr222     | 0.0000 | No |
| 39500 | Olfr224     | 0.0000 | No |
| 39501 | Olfr225     | 0.0000 | No |
| 39502 | Olfr228     | 0.0000 | No |
| 39503 | Olfr22-ps1  | 0.0000 | No |
| 39504 | Olfr23      | 0.0000 | No |
| 39505 | Olfr231     | 0.0000 | No |
| 39506 | Olfr235     | 0.0000 | No |
| 39507 | Olfr237-ps1 | 0.0000 | No |
| 39508 | Olfr24      | 0.0000 | No |
| 39509 | Olfr241-ps1 | 0.0000 | No |
| 39510 | Olfr243     | 0.0000 | No |
| 39511 | Olfr247     | 0.0000 | No |

|       |             |        |    |
|-------|-------------|--------|----|
| 39512 | Olfr248     | 0.0000 | No |
| 39513 | Olfr25      | 0.0000 | No |
| 39514 | Olfr250     | 0.0000 | No |
| 39515 | Olfr251     | 0.0000 | No |
| 39516 | Olfr258-ps1 | 0.0000 | No |
| 39517 | Olfr260-ps1 | 0.0000 | No |
| 39518 | Olfr262     | 0.0000 | No |
| 39519 | Olfr267     | 0.0000 | No |
| 39520 | Olfr268-ps1 | 0.0000 | No |
| 39521 | Olfr269-ps1 | 0.0000 | No |
| 39522 | Olfr27      | 0.0000 | No |
| 39523 | Olfr270     | 0.0000 | No |
| 39524 | Olfr271-ps1 | 0.0000 | No |
| 39525 | Olfr272     | 0.0000 | No |
| 39526 | Olfr273     | 0.0000 | No |
| 39527 | Olfr274-ps1 | 0.0000 | No |
| 39528 | Olfr275     | 0.0000 | No |
| 39529 | Olfr277-ps1 | 0.0000 | No |
| 39530 | Olfr278-ps1 | 0.0000 | No |
| 39531 | Olfr279     | 0.0000 | No |
| 39532 | Olfr281     | 0.0000 | No |
| 39533 | Olfr282     | 0.0000 | No |
| 39534 | Olfr284     | 0.0000 | No |
| 39535 | Olfr285     | 0.0000 | No |
| 39536 | Olfr286     | 0.0000 | No |
| 39537 | Olfr287     | 0.0000 | No |
| 39538 | Olfr289-ps1 | 0.0000 | No |
| 39539 | Olfr291     | 0.0000 | No |
| 39540 | Olfr293     | 0.0000 | No |
| 39541 | Olfr294     | 0.0000 | No |
| 39542 | Olfr295     | 0.0000 | No |
| 39543 | Olfr297     | 0.0000 | No |
| 39544 | Olfr298     | 0.0000 | No |
| 39545 | Olfr299     | 0.0000 | No |
| 39546 | Olfr29-ps1  | 0.0000 | No |
| 39547 | Olfr3       | 0.0000 | No |
| 39548 | Olfr30      | 0.0000 | No |
| 39549 | Olfr300-ps1 | 0.0000 | No |
| 39550 | Olfr301     | 0.0000 | No |
| 39551 | Olfr303     | 0.0000 | No |
| 39552 | Olfr305     | 0.0000 | No |
| 39553 | Olfr307     | 0.0000 | No |
| 39554 | Olfr308     | 0.0000 | No |
| 39555 | Olfr309     | 0.0000 | No |
| 39556 | Olfr31      | 0.0000 | No |
| 39557 | Olfr310     | 0.0000 | No |

|       |             |        |    |
|-------|-------------|--------|----|
| 39558 | Olfr311     | 0.0000 | No |
| 39559 | Olfr312     | 0.0000 | No |
| 39560 | Olfr313     | 0.0000 | No |
| 39561 | Olfr314     | 0.0000 | No |
| 39562 | Olfr316     | 0.0000 | No |
| 39563 | Olfr317     | 0.0000 | No |
| 39564 | Olfr318     | 0.0000 | No |
| 39565 | Olfr319     | 0.0000 | No |
| 39566 | Olfr32      | 0.0000 | No |
| 39567 | Olfr322     | 0.0000 | No |
| 39568 | Olfr323     | 0.0000 | No |
| 39569 | Olfr324     | 0.0000 | No |
| 39570 | Olfr325     | 0.0000 | No |
| 39571 | Olfr326-ps1 | 0.0000 | No |
| 39572 | Olfr328     | 0.0000 | No |
| 39573 | Olfr33      | 0.0000 | No |
| 39574 | Olfr330     | 0.0000 | No |
| 39575 | Olfr332     | 0.0000 | No |
| 39576 | Olfr336-ps1 | 0.0000 | No |
| 39577 | Olfr337-ps1 | 0.0000 | No |
| 39578 | Olfr338     | 0.0000 | No |
| 39579 | Olfr339     | 0.0000 | No |
| 39580 | Olfr340     | 0.0000 | No |
| 39581 | Olfr341     | 0.0000 | No |
| 39582 | Olfr342     | 0.0000 | No |
| 39583 | Olfr344     | 0.0000 | No |
| 39584 | Olfr345     | 0.0000 | No |
| 39585 | Olfr346     | 0.0000 | No |
| 39586 | Olfr347     | 0.0000 | No |
| 39587 | Olfr348     | 0.0000 | No |
| 39588 | Olfr349-ps1 | 0.0000 | No |
| 39589 | Olfr350     | 0.0000 | No |
| 39590 | Olfr351     | 0.0000 | No |
| 39591 | Olfr352     | 0.0000 | No |
| 39592 | Olfr353     | 0.0000 | No |
| 39593 | Olfr354     | 0.0000 | No |
| 39594 | Olfr355     | 0.0000 | No |
| 39595 | Olfr356     | 0.0000 | No |
| 39596 | Olfr358     | 0.0000 | No |
| 39597 | Olfr359-ps1 | 0.0000 | No |
| 39598 | Olfr360     | 0.0000 | No |
| 39599 | Olfr361     | 0.0000 | No |
| 39600 | Olfr362     | 0.0000 | No |
| 39601 | Olfr363-ps  | 0.0000 | No |
| 39602 | Olfr364-ps1 | 0.0000 | No |
| 39603 | Olfr365     | 0.0000 | No |

|       |             |        |    |
|-------|-------------|--------|----|
| 39604 | Olfr366     | 0.0000 | No |
| 39605 | Olfr367-ps  | 0.0000 | No |
| 39606 | Olfr368     | 0.0000 | No |
| 39607 | Olfr369-ps1 | 0.0000 | No |
| 39608 | Olfr370     | 0.0000 | No |
| 39609 | Olfr371     | 0.0000 | No |
| 39610 | Olfr372     | 0.0000 | No |
| 39611 | Olfr373     | 0.0000 | No |
| 39612 | Olfr374     | 0.0000 | No |
| 39613 | Olfr375-ps1 | 0.0000 | No |
| 39614 | Olfr376     | 0.0000 | No |
| 39615 | Olfr377-ps1 | 0.0000 | No |
| 39616 | Olfr38      | 0.0000 | No |
| 39617 | Olfr380     | 0.0000 | No |
| 39618 | Olfr381     | 0.0000 | No |
| 39619 | Olfr382     | 0.0000 | No |
| 39620 | Olfr383-ps1 | 0.0000 | No |
| 39621 | Olfr384     | 0.0000 | No |
| 39622 | Olfr385     | 0.0000 | No |
| 39623 | Olfr387-ps1 | 0.0000 | No |
| 39624 | Olfr389     | 0.0000 | No |
| 39625 | Olfr390     | 0.0000 | No |
| 39626 | Olfr391-ps  | 0.0000 | No |
| 39627 | Olfr392     | 0.0000 | No |
| 39628 | Olfr393     | 0.0000 | No |
| 39629 | Olfr394     | 0.0000 | No |
| 39630 | Olfr395     | 0.0000 | No |
| 39631 | Olfr396-ps1 | 0.0000 | No |
| 39632 | Olfr397     | 0.0000 | No |
| 39633 | Olfr398     | 0.0000 | No |
| 39634 | Olfr399     | 0.0000 | No |
| 39635 | Olfr401     | 0.0000 | No |
| 39636 | Olfr402     | 0.0000 | No |
| 39637 | Olfr404-ps1 | 0.0000 | No |
| 39638 | Olfr407-ps1 | 0.0000 | No |
| 39639 | Olfr408-ps1 | 0.0000 | No |
| 39640 | Olfr409-ps1 | 0.0000 | No |
| 39641 | Olfr410     | 0.0000 | No |
| 39642 | Olfr411     | 0.0000 | No |
| 39643 | Olfr412     | 0.0000 | No |
| 39644 | Olfr414     | 0.0000 | No |
| 39645 | Olfr417     | 0.0000 | No |
| 39646 | Olfr418     | 0.0000 | No |
| 39647 | Olfr419     | 0.0000 | No |
| 39648 | Olfr421-ps1 | 0.0000 | No |
| 39649 | Olfr424     | 0.0000 | No |

|       |             |        |    |
|-------|-------------|--------|----|
| 39650 | Olfr428-ps1 | 0.0000 | No |
| 39651 | Olfr429     | 0.0000 | No |
| 39652 | Olfr43      | 0.0000 | No |
| 39653 | Olfr430     | 0.0000 | No |
| 39654 | Olfr431-ps1 | 0.0000 | No |
| 39655 | Olfr432     | 0.0000 | No |
| 39656 | Olfr433     | 0.0000 | No |
| 39657 | Olfr434     | 0.0000 | No |
| 39658 | Olfr437     | 0.0000 | No |
| 39659 | Olfr439-ps1 | 0.0000 | No |
| 39660 | Olfr44      | 0.0000 | No |
| 39661 | Olfr440-ps1 | 0.0000 | No |
| 39662 | Olfr441     | 0.0000 | No |
| 39663 | Olfr442-ps1 | 0.0000 | No |
| 39664 | Olfr443-ps1 | 0.0000 | No |
| 39665 | Olfr446     | 0.0000 | No |
| 39666 | Olfr447     | 0.0000 | No |
| 39667 | Olfr448     | 0.0000 | No |
| 39668 | Olfr449     | 0.0000 | No |
| 39669 | Olfr45      | 0.0000 | No |
| 39670 | Olfr450     | 0.0000 | No |
| 39671 | Olfr451-ps1 | 0.0000 | No |
| 39672 | Olfr452     | 0.0000 | No |
| 39673 | Olfr453     | 0.0000 | No |
| 39674 | Olfr454-ps1 | 0.0000 | No |
| 39675 | Olfr456     | 0.0000 | No |
| 39676 | Olfr457     | 0.0000 | No |
| 39677 | Olfr459     | 0.0000 | No |
| 39678 | Olfr46      | 0.0000 | No |
| 39679 | Olfr460     | 0.0000 | No |
| 39680 | Olfr463     | 0.0000 | No |
| 39681 | Olfr464     | 0.0000 | No |
| 39682 | Olfr465-ps1 | 0.0000 | No |
| 39683 | Olfr466     | 0.0000 | No |
| 39684 | Olfr468-ps1 | 0.0000 | No |
| 39685 | Olfr47      | 0.0000 | No |
| 39686 | Olfr470     | 0.0000 | No |
| 39687 | Olfr472     | 0.0000 | No |
| 39688 | Olfr473     | 0.0000 | No |
| 39689 | Olfr474     | 0.0000 | No |
| 39690 | Olfr476     | 0.0000 | No |
| 39691 | Olfr477     | 0.0000 | No |
| 39692 | Olfr478     | 0.0000 | No |
| 39693 | Olfr479     | 0.0000 | No |
| 39694 | Olfr480     | 0.0000 | No |
| 39695 | Olfr481     | 0.0000 | No |

|       |             |        |    |
|-------|-------------|--------|----|
| 39696 | Olfr482     | 0.0000 | No |
| 39697 | Olfr483     | 0.0000 | No |
| 39698 | Olfr484     | 0.0000 | No |
| 39699 | Olfr485     | 0.0000 | No |
| 39700 | Olfr486     | 0.0000 | No |
| 39701 | Olfr487     | 0.0000 | No |
| 39702 | Olfr489-ps1 | 0.0000 | No |
| 39703 | Olfr49      | 0.0000 | No |
| 39704 | Olfr491     | 0.0000 | No |
| 39705 | Olfr493     | 0.0000 | No |
| 39706 | Olfr494     | 0.0000 | No |
| 39707 | Olfr495     | 0.0000 | No |
| 39708 | Olfr496-ps1 | 0.0000 | No |
| 39709 | Olfr497     | 0.0000 | No |
| 39710 | Olfr498     | 0.0000 | No |
| 39711 | Olfr5       | 0.0000 | No |
| 39712 | Olfr50      | 0.0000 | No |
| 39713 | Olfr500-ps1 | 0.0000 | No |
| 39714 | Olfr501-ps1 | 0.0000 | No |
| 39715 | Olfr502     | 0.0000 | No |
| 39716 | Olfr503     | 0.0000 | No |
| 39717 | Olfr504     | 0.0000 | No |
| 39718 | Olfr505-ps1 | 0.0000 | No |
| 39719 | Olfr506     | 0.0000 | No |
| 39720 | Olfr507     | 0.0000 | No |
| 39721 | Olfr509     | 0.0000 | No |
| 39722 | Olfr51      | 0.0000 | No |
| 39723 | Olfr510     | 0.0000 | No |
| 39724 | Olfr511-ps1 | 0.0000 | No |
| 39725 | Olfr512     | 0.0000 | No |
| 39726 | Olfr514     | 0.0000 | No |
| 39727 | Olfr515-ps1 | 0.0000 | No |
| 39728 | Olfr516     | 0.0000 | No |
| 39729 | Olfr517     | 0.0000 | No |
| 39730 | Olfr518     | 0.0000 | No |
| 39731 | Olfr520     | 0.0000 | No |
| 39732 | Olfr521     | 0.0000 | No |
| 39733 | Olfr522     | 0.0000 | No |
| 39734 | Olfr528-ps1 | 0.0000 | No |
| 39735 | Olfr529-ps1 | 0.0000 | No |
| 39736 | Olfr53      | 0.0000 | No |
| 39737 | Olfr530     | 0.0000 | No |
| 39738 | Olfr532     | 0.0000 | No |
| 39739 | Olfr534-ps1 | 0.0000 | No |
| 39740 | Olfr535     | 0.0000 | No |
| 39741 | Olfr536     | 0.0000 | No |



|       |             |        |    |
|-------|-------------|--------|----|
| 39742 | Olfr537-ps1 | 0.0000 | No |
| 39743 | Olfr538     | 0.0000 | No |
| 39744 | Olfr539     | 0.0000 | No |
| 39745 | Olfr54      | 0.0000 | No |
| 39746 | Olfr540-ps1 | 0.0000 | No |
| 39747 | Olfr541     | 0.0000 | No |
| 39748 | Olfr543     | 0.0000 | No |
| 39749 | Olfr544     | 0.0000 | No |
| 39750 | Olfr545     | 0.0000 | No |
| 39751 | Olfr546-ps1 | 0.0000 | No |
| 39752 | Olfr548-ps1 | 0.0000 | No |
| 39753 | Olfr55      | 0.0000 | No |
| 39754 | Olfr550     | 0.0000 | No |
| 39755 | Olfr551     | 0.0000 | No |
| 39756 | Olfr552     | 0.0000 | No |
| 39757 | Olfr553     | 0.0000 | No |
| 39758 | Olfr554     | 0.0000 | No |
| 39759 | Olfr555     | 0.0000 | No |
| 39760 | Olfr556     | 0.0000 | No |
| 39761 | Olfr557     | 0.0000 | No |
| 39762 | Olfr558     | 0.0000 | No |
| 39763 | Olfr56      | 0.0000 | No |
| 39764 | Olfr560     | 0.0000 | No |
| 39765 | Olfr561     | 0.0000 | No |
| 39766 | Olfr562-ps1 | 0.0000 | No |
| 39767 | Olfr563-ps1 | 0.0000 | No |
| 39768 | Olfr564     | 0.0000 | No |
| 39769 | Olfr565-ps1 | 0.0000 | No |
| 39770 | Olfr566     | 0.0000 | No |
| 39771 | Olfr567-ps1 | 0.0000 | No |
| 39772 | Olfr569     | 0.0000 | No |
| 39773 | Olfr57      | 0.0000 | No |
| 39774 | Olfr570     | 0.0000 | No |
| 39775 | Olfr571     | 0.0000 | No |
| 39776 | Olfr572     | 0.0000 | No |
| 39777 | Olfr573-ps1 | 0.0000 | No |
| 39778 | Olfr575     | 0.0000 | No |
| 39779 | Olfr577     | 0.0000 | No |
| 39780 | Olfr578     | 0.0000 | No |
| 39781 | Olfr58      | 0.0000 | No |
| 39782 | Olfr580-ps1 | 0.0000 | No |
| 39783 | Olfr581-ps1 | 0.0000 | No |
| 39784 | Olfr582     | 0.0000 | No |
| 39785 | Olfr583     | 0.0000 | No |
| 39786 | Olfr584     | 0.0000 | No |
| 39787 | Olfr585     | 0.0000 | No |

|       |             |        |    |
|-------|-------------|--------|----|
| 39788 | Olfr586     | 0.0000 | No |
| 39789 | Olfr587-ps1 | 0.0000 | No |
| 39790 | Olfr588-ps1 | 0.0000 | No |
| 39791 | Olfr589     | 0.0000 | No |
| 39792 | Olfr59      | 0.0000 | No |
| 39793 | Olfr590-ps1 | 0.0000 | No |
| 39794 | Olfr591     | 0.0000 | No |
| 39795 | Olfr592     | 0.0000 | No |
| 39796 | Olfr593     | 0.0000 | No |
| 39797 | Olfr594     | 0.0000 | No |
| 39798 | Olfr595-ps1 | 0.0000 | No |
| 39799 | Olfr596     | 0.0000 | No |
| 39800 | Olfr597     | 0.0000 | No |
| 39801 | Olfr598     | 0.0000 | No |
| 39802 | Olfr599     | 0.0000 | No |
| 39803 | Olfr6       | 0.0000 | No |
| 39804 | Olfr600     | 0.0000 | No |
| 39805 | Olfr601     | 0.0000 | No |
| 39806 | Olfr602-ps1 | 0.0000 | No |
| 39807 | Olfr603     | 0.0000 | No |
| 39808 | Olfr605     | 0.0000 | No |
| 39809 | Olfr606     | 0.0000 | No |
| 39810 | Olfr607     | 0.0000 | No |
| 39811 | Olfr609     | 0.0000 | No |
| 39812 | Olfr61      | 0.0000 | No |
| 39813 | Olfr610     | 0.0000 | No |
| 39814 | Olfr611     | 0.0000 | No |
| 39815 | Olfr612     | 0.0000 | No |
| 39816 | Olfr613     | 0.0000 | No |
| 39817 | Olfr615     | 0.0000 | No |
| 39818 | Olfr616     | 0.0000 | No |
| 39819 | Olfr617     | 0.0000 | No |
| 39820 | Olfr62      | 0.0000 | No |
| 39821 | Olfr620     | 0.0000 | No |
| 39822 | Olfr621-ps1 | 0.0000 | No |
| 39823 | Olfr622     | 0.0000 | No |
| 39824 | Olfr623     | 0.0000 | No |
| 39825 | Olfr624     | 0.0000 | No |
| 39826 | Olfr625-ps1 | 0.0000 | No |
| 39827 | Olfr626-ps1 | 0.0000 | No |
| 39828 | Olfr628     | 0.0000 | No |
| 39829 | Olfr629     | 0.0000 | No |
| 39830 | Olfr63      | 0.0000 | No |
| 39831 | Olfr630     | 0.0000 | No |
| 39832 | Olfr632     | 0.0000 | No |
| 39833 | Olfr633     | 0.0000 | No |

|       |             |        |    |
|-------|-------------|--------|----|
| 39834 | Olfr634-ps1 | 0.0000 | No |
| 39835 | Olfr635     | 0.0000 | No |
| 39836 | Olfr636-ps1 | 0.0000 | No |
| 39837 | Olfr637-ps1 | 0.0000 | No |
| 39838 | Olfr639     | 0.0000 | No |
| 39839 | Olfr64      | 0.0000 | No |
| 39840 | Olfr641     | 0.0000 | No |
| 39841 | Olfr642     | 0.0000 | No |
| 39842 | Olfr643     | 0.0000 | No |
| 39843 | Olfr644     | 0.0000 | No |
| 39844 | Olfr645     | 0.0000 | No |
| 39845 | Olfr646     | 0.0000 | No |
| 39846 | Olfr647-ps1 | 0.0000 | No |
| 39847 | Olfr648     | 0.0000 | No |
| 39848 | Olfr651     | 0.0000 | No |
| 39849 | Olfr652     | 0.0000 | No |
| 39850 | Olfr653     | 0.0000 | No |
| 39851 | Olfr654     | 0.0000 | No |
| 39852 | Olfr656     | 0.0000 | No |
| 39853 | Olfr658     | 0.0000 | No |
| 39854 | Olfr659     | 0.0000 | No |
| 39855 | Olfr66      | 0.0000 | No |
| 39856 | Olfr660-ps1 | 0.0000 | No |
| 39857 | Olfr661     | 0.0000 | No |
| 39858 | Olfr663     | 0.0000 | No |
| 39859 | Olfr664     | 0.0000 | No |
| 39860 | Olfr665     | 0.0000 | No |
| 39861 | Olfr666     | 0.0000 | No |
| 39862 | Olfr668     | 0.0000 | No |
| 39863 | Olfr669     | 0.0000 | No |
| 39864 | Olfr67      | 0.0000 | No |
| 39865 | Olfr671     | 0.0000 | No |
| 39866 | Olfr673-ps1 | 0.0000 | No |
| 39867 | Olfr674-ps1 | 0.0000 | No |
| 39868 | Olfr675     | 0.0000 | No |
| 39869 | Olfr676     | 0.0000 | No |
| 39870 | Olfr677     | 0.0000 | No |
| 39871 | Olfr678     | 0.0000 | No |
| 39872 | Olfr679     | 0.0000 | No |
| 39873 | Olfr682-ps1 | 0.0000 | No |
| 39874 | Olfr684     | 0.0000 | No |
| 39875 | Olfr685     | 0.0000 | No |
| 39876 | Olfr686     | 0.0000 | No |
| 39877 | Olfr687     | 0.0000 | No |
| 39878 | Olfr688     | 0.0000 | No |
| 39879 | Olfr689     | 0.0000 | No |

|       |             |        |    |
|-------|-------------|--------|----|
| 39880 | Olfr69      | 0.0000 | No |
| 39881 | Olfr691     | 0.0000 | No |
| 39882 | Olfr694     | 0.0000 | No |
| 39883 | Olfr695     | 0.0000 | No |
| 39884 | Olfr697     | 0.0000 | No |
| 39885 | Olfr699     | 0.0000 | No |
| 39886 | Olfr70      | 0.0000 | No |
| 39887 | Olfr700     | 0.0000 | No |
| 39888 | Olfr701     | 0.0000 | No |
| 39889 | Olfr703     | 0.0000 | No |
| 39890 | Olfr704     | 0.0000 | No |
| 39891 | Olfr706     | 0.0000 | No |
| 39892 | Olfr707     | 0.0000 | No |
| 39893 | Olfr709-ps1 | 0.0000 | No |
| 39894 | Olfr710     | 0.0000 | No |
| 39895 | Olfr711     | 0.0000 | No |
| 39896 | Olfr712-ps1 | 0.0000 | No |
| 39897 | Olfr713     | 0.0000 | No |
| 39898 | Olfr714     | 0.0000 | No |
| 39899 | Olfr715     | 0.0000 | No |
| 39900 | Olfr716     | 0.0000 | No |
| 39901 | Olfr717-ps1 | 0.0000 | No |
| 39902 | Olfr718-ps1 | 0.0000 | No |
| 39903 | Olfr719-ps  | 0.0000 | No |
| 39904 | Olfr720     | 0.0000 | No |
| 39905 | Olfr721-ps1 | 0.0000 | No |
| 39906 | Olfr722     | 0.0000 | No |
| 39907 | Olfr723     | 0.0000 | No |
| 39908 | Olfr725     | 0.0000 | No |
| 39909 | Olfr728     | 0.0000 | No |
| 39910 | Olfr729     | 0.0000 | No |
| 39911 | Olfr73      | 0.0000 | No |
| 39912 | Olfr730     | 0.0000 | No |
| 39913 | Olfr731     | 0.0000 | No |
| 39914 | Olfr733     | 0.0000 | No |
| 39915 | Olfr734     | 0.0000 | No |
| 39916 | Olfr735     | 0.0000 | No |
| 39917 | Olfr736     | 0.0000 | No |
| 39918 | Olfr737-ps1 | 0.0000 | No |
| 39919 | Olfr738     | 0.0000 | No |
| 39920 | Olfr739     | 0.0000 | No |
| 39921 | Olfr74      | 0.0000 | No |
| 39922 | Olfr740     | 0.0000 | No |
| 39923 | Olfr741     | 0.0000 | No |
| 39924 | Olfr743     | 0.0000 | No |
| 39925 | Olfr744     | 0.0000 | No |

|       |             |        |    |
|-------|-------------|--------|----|
| 39926 | Olfr746     | 0.0000 | No |
| 39927 | Olfr747     | 0.0000 | No |
| 39928 | Olfr749     | 0.0000 | No |
| 39929 | Olfr751-ps1 | 0.0000 | No |
| 39930 | Olfr752-ps1 | 0.0000 | No |
| 39931 | Olfr753-ps1 | 0.0000 | No |
| 39932 | Olfr754-ps1 | 0.0000 | No |
| 39933 | Olfr755-ps1 | 0.0000 | No |
| 39934 | Olfr756-ps1 | 0.0000 | No |
| 39935 | Olfr757-ps1 | 0.0000 | No |
| 39936 | Olfr758-ps1 | 0.0000 | No |
| 39937 | Olfr759-ps1 | 0.0000 | No |
| 39938 | Olfr76      | 0.0000 | No |
| 39939 | Olfr760-ps1 | 0.0000 | No |
| 39940 | Olfr763     | 0.0000 | No |
| 39941 | Olfr764-ps1 | 0.0000 | No |
| 39942 | Olfr765     | 0.0000 | No |
| 39943 | Olfr767     | 0.0000 | No |
| 39944 | Olfr768     | 0.0000 | No |
| 39945 | Olfr769     | 0.0000 | No |
| 39946 | Olfr770     | 0.0000 | No |
| 39947 | Olfr771     | 0.0000 | No |
| 39948 | Olfr772     | 0.0000 | No |
| 39949 | Olfr773     | 0.0000 | No |
| 39950 | Olfr774     | 0.0000 | No |
| 39951 | Olfr776     | 0.0000 | No |
| 39952 | Olfr777     | 0.0000 | No |
| 39953 | Olfr778-ps1 | 0.0000 | No |
| 39954 | Olfr78      | 0.0000 | No |
| 39955 | Olfr780     | 0.0000 | No |
| 39956 | Olfr781     | 0.0000 | No |
| 39957 | Olfr782     | 0.0000 | No |
| 39958 | Olfr783-ps1 | 0.0000 | No |
| 39959 | Olfr784     | 0.0000 | No |
| 39960 | Olfr786     | 0.0000 | No |
| 39961 | Olfr787     | 0.0000 | No |
| 39962 | Olfr788     | 0.0000 | No |
| 39963 | Olfr790     | 0.0000 | No |
| 39964 | Olfr791     | 0.0000 | No |
| 39965 | Olfr792     | 0.0000 | No |
| 39966 | Olfr794     | 0.0000 | No |
| 39967 | Olfr795-ps1 | 0.0000 | No |
| 39968 | Olfr796     | 0.0000 | No |
| 39969 | Olfr797-ps1 | 0.0000 | No |
| 39970 | Olfr798     | 0.0000 | No |
| 39971 | Olfr800     | 0.0000 | No |

|       |             |        |    |
|-------|-------------|--------|----|
| 39972 | Olfr804     | 0.0000 | No |
| 39973 | Olfr805     | 0.0000 | No |
| 39974 | Olfr806     | 0.0000 | No |
| 39975 | Olfr807     | 0.0000 | No |
| 39976 | Olfr809     | 0.0000 | No |
| 39977 | Olfr810     | 0.0000 | No |
| 39978 | Olfr811     | 0.0000 | No |
| 39979 | Olfr812     | 0.0000 | No |
| 39980 | Olfr813     | 0.0000 | No |
| 39981 | Olfr814     | 0.0000 | No |
| 39982 | Olfr815     | 0.0000 | No |
| 39983 | Olfr816     | 0.0000 | No |
| 39984 | Olfr818     | 0.0000 | No |
| 39985 | Olfr819     | 0.0000 | No |
| 39986 | Olfr820     | 0.0000 | No |
| 39987 | Olfr821     | 0.0000 | No |
| 39988 | Olfr822     | 0.0000 | No |
| 39989 | Olfr824     | 0.0000 | No |
| 39990 | Olfr825     | 0.0000 | No |
| 39991 | Olfr826     | 0.0000 | No |
| 39992 | Olfr827     | 0.0000 | No |
| 39993 | Olfr828     | 0.0000 | No |
| 39994 | Olfr831-ps1 | 0.0000 | No |
| 39995 | Olfr832     | 0.0000 | No |
| 39996 | Olfr833-ps1 | 0.0000 | No |
| 39997 | Olfr834     | 0.0000 | No |
| 39998 | Olfr835     | 0.0000 | No |
| 39999 | Olfr836     | 0.0000 | No |
| 40000 | Olfr837     | 0.0000 | No |
| 40001 | Olfr838-ps1 | 0.0000 | No |
| 40002 | Olfr839-ps1 | 0.0000 | No |
| 40003 | Olfr840-ps1 | 0.0000 | No |
| 40004 | Olfr841-ps1 | 0.0000 | No |
| 40005 | Olfr843     | 0.0000 | No |
| 40006 | Olfr844     | 0.0000 | No |
| 40007 | Olfr845     | 0.0000 | No |
| 40008 | Olfr846     | 0.0000 | No |
| 40009 | Olfr847     | 0.0000 | No |
| 40010 | Olfr848-ps1 | 0.0000 | No |
| 40011 | Olfr849     | 0.0000 | No |
| 40012 | Olfr850     | 0.0000 | No |
| 40013 | Olfr851     | 0.0000 | No |
| 40014 | Olfr852-ps1 | 0.0000 | No |
| 40015 | Olfr853     | 0.0000 | No |
| 40016 | Olfr854     | 0.0000 | No |
| 40017 | Olfr855     | 0.0000 | No |

|       |             |        |    |
|-------|-------------|--------|----|
| 40018 | Olfr856-ps1 | 0.0000 | No |
| 40019 | Olfr857     | 0.0000 | No |
| 40020 | Olfr858-ps1 | 0.0000 | No |
| 40021 | Olfr859     | 0.0000 | No |
| 40022 | Olfr861-ps1 | 0.0000 | No |
| 40023 | Olfr862     | 0.0000 | No |
| 40024 | Olfr863-ps  | 0.0000 | No |
| 40025 | Olfr864-ps1 | 0.0000 | No |
| 40026 | Olfr865-ps1 | 0.0000 | No |
| 40027 | Olfr867     | 0.0000 | No |
| 40028 | Olfr868     | 0.0000 | No |
| 40029 | Olfr869     | 0.0000 | No |
| 40030 | Olfr870     | 0.0000 | No |
| 40031 | Olfr871     | 0.0000 | No |
| 40032 | Olfr872     | 0.0000 | No |
| 40033 | Olfr873     | 0.0000 | No |
| 40034 | Olfr874     | 0.0000 | No |
| 40035 | Olfr875     | 0.0000 | No |
| 40036 | Olfr876     | 0.0000 | No |
| 40037 | Olfr877     | 0.0000 | No |
| 40038 | Olfr878     | 0.0000 | No |
| 40039 | Olfr879-ps1 | 0.0000 | No |
| 40040 | Olfr880-ps1 | 0.0000 | No |
| 40041 | Olfr881     | 0.0000 | No |
| 40042 | Olfr882-ps1 | 0.0000 | No |
| 40043 | Olfr883     | 0.0000 | No |
| 40044 | Olfr884     | 0.0000 | No |
| 40045 | Olfr885     | 0.0000 | No |
| 40046 | Olfr886-ps1 | 0.0000 | No |
| 40047 | Olfr887     | 0.0000 | No |
| 40048 | Olfr888     | 0.0000 | No |
| 40049 | Olfr890     | 0.0000 | No |
| 40050 | Olfr891     | 0.0000 | No |
| 40051 | Olfr893     | 0.0000 | No |
| 40052 | Olfr894     | 0.0000 | No |
| 40053 | Olfr895     | 0.0000 | No |
| 40054 | Olfr896-ps1 | 0.0000 | No |
| 40055 | Olfr897-ps1 | 0.0000 | No |
| 40056 | Olfr898     | 0.0000 | No |
| 40057 | Olfr9       | 0.0000 | No |
| 40058 | Olfr90      | 0.0000 | No |
| 40059 | Olfr901     | 0.0000 | No |
| 40060 | Olfr904     | 0.0000 | No |
| 40061 | Olfr905     | 0.0000 | No |
| 40062 | Olfr906     | 0.0000 | No |
| 40063 | Olfr907     | 0.0000 | No |

|       |             |        |    |
|-------|-------------|--------|----|
| 40064 | Olfr908     | 0.0000 | No |
| 40065 | Olfr91      | 0.0000 | No |
| 40066 | Olfr910     | 0.0000 | No |
| 40067 | Olfr912     | 0.0000 | No |
| 40068 | Olfr913     | 0.0000 | No |
| 40069 | Olfr914     | 0.0000 | No |
| 40070 | Olfr919     | 0.0000 | No |
| 40071 | Olfr921     | 0.0000 | No |
| 40072 | Olfr922     | 0.0000 | No |
| 40073 | Olfr923     | 0.0000 | No |
| 40074 | Olfr925-ps1 | 0.0000 | No |
| 40075 | Olfr928-ps1 | 0.0000 | No |
| 40076 | Olfr929-ps1 | 0.0000 | No |
| 40077 | Olfr93      | 0.0000 | No |
| 40078 | Olfr931-ps1 | 0.0000 | No |
| 40079 | Olfr933     | 0.0000 | No |
| 40080 | Olfr934     | 0.0000 | No |
| 40081 | Olfr935     | 0.0000 | No |
| 40082 | Olfr936     | 0.0000 | No |
| 40083 | Olfr938     | 0.0000 | No |
| 40084 | Olfr939-ps1 | 0.0000 | No |
| 40085 | Olfr942-ps1 | 0.0000 | No |
| 40086 | Olfr943     | 0.0000 | No |
| 40087 | Olfr945     | 0.0000 | No |
| 40088 | Olfr946-ps1 | 0.0000 | No |
| 40089 | Olfr947-ps1 | 0.0000 | No |
| 40090 | Olfr948     | 0.0000 | No |
| 40091 | Olfr950-ps1 | 0.0000 | No |
| 40092 | Olfr951     | 0.0000 | No |
| 40093 | Olfr952     | 0.0000 | No |
| 40094 | Olfr954     | 0.0000 | No |
| 40095 | Olfr955     | 0.0000 | No |
| 40096 | Olfr956-ps1 | 0.0000 | No |
| 40097 | Olfr957     | 0.0000 | No |
| 40098 | Olfr958     | 0.0000 | No |
| 40099 | Olfr959     | 0.0000 | No |
| 40100 | Olfr96      | 0.0000 | No |
| 40101 | Olfr963     | 0.0000 | No |
| 40102 | Olfr965     | 0.0000 | No |
| 40103 | Olfr966-ps1 | 0.0000 | No |
| 40104 | Olfr967     | 0.0000 | No |
| 40105 | Olfr968     | 0.0000 | No |
| 40106 | Olfr969     | 0.0000 | No |
| 40107 | Olfr97      | 0.0000 | No |
| 40108 | Olfr970     | 0.0000 | No |
| 40109 | Olfr972     | 0.0000 | No |



|       |             |        |    |
|-------|-------------|--------|----|
| 40110 | Olfr975     | 0.0000 | No |
| 40111 | Olfr976     | 0.0000 | No |
| 40112 | Olfr977-ps1 | 0.0000 | No |
| 40113 | Olfr979     | 0.0000 | No |
| 40114 | Olfr98      | 0.0000 | No |
| 40115 | Olfr981     | 0.0000 | No |
| 40116 | Olfr984     | 0.0000 | No |
| 40117 | Olfr986     | 0.0000 | No |
| 40118 | Olfr988     | 0.0000 | No |
| 40119 | Olfr989-ps1 | 0.0000 | No |
| 40120 | Olfr99      | 0.0000 | No |
| 40121 | Olfr990-ps1 | 0.0000 | No |
| 40122 | Olfr991-ps1 | 0.0000 | No |
| 40123 | Olfr993     | 0.0000 | No |
| 40124 | Olfr994     | 0.0000 | No |
| 40125 | Olfr996     | 0.0000 | No |
| 40126 | Olfr997-ps1 | 0.0000 | No |
| 40127 | Olfr998     | 0.0000 | No |
| 40128 | Olfr999-ps1 | 0.0000 | No |
| 40129 | Olig1       | 0.0000 | No |
| 40130 | Olig3       | 0.0000 | No |
| 40131 | Olr1        | 0.0000 | No |
| 40132 | Olr445-ps1  | 0.0000 | No |
| 40133 | Oma1        | 0.0000 | No |
| 40134 | Omd         | 0.0000 | No |
| 40135 | Omg         | 0.0000 | No |
| 40136 | Omp         | 0.0000 | No |
| 40137 | Omt2a       | 0.0000 | No |
| 40138 | Omt2b       | 0.0000 | No |
| 40139 | Onecut1     | 0.0000 | No |
| 40140 | Onecut2     | 0.0000 | No |
| 40141 | Onecut3     | 0.0000 | No |
| 40142 | Oog1        | 0.0000 | No |
| 40143 | Oog2        | 0.0000 | No |
| 40144 | Oog3        | 0.0000 | No |
| 40145 | Oog4        | 0.0000 | No |
| 40146 | Oosp1       | 0.0000 | No |
| 40147 | Oosp3       | 0.0000 | No |
| 40148 | Opa1        | 0.0000 | No |
| 40149 | Opa3        | 0.0000 | No |
| 40150 | Opcml       | 0.0000 | No |
| 40151 | Ophn1       | 0.0000 | No |
| 40152 | Opn1mw      | 0.0000 | No |
| 40153 | Opn1sw      | 0.0000 | No |
| 40154 | Opn3        | 0.0000 | No |
| 40155 | Oprd1       | 0.0000 | No |

|       |         |        |    |
|-------|---------|--------|----|
| 40156 | Oprk1   | 0.0000 | No |
| 40157 | Oprl1   | 0.0000 | No |
| 40158 | Oprm1   | 0.0000 | No |
| 40159 | Optc    | 0.0000 | No |
| 40160 | Optn    | 0.0000 | No |
| 40161 | OR4P4   | 0.0000 | No |
| 40162 | Orai1   | 0.0000 | No |
| 40163 | Orai2   | 0.0000 | No |
| 40164 | Oraov1  | 0.0000 | No |
| 40165 | Orc1    | 0.0000 | No |
| 40166 | Orc2    | 0.0000 | No |
| 40167 | Orc3    | 0.0000 | No |
| 40168 | Orc4    | 0.0000 | No |
| 40169 | Orc5    | 0.0000 | No |
| 40170 | Orc6    | 0.0000 | No |
| 40171 | Orm1    | 0.0000 | No |
| 40172 | Orm2    | 0.0000 | No |
| 40173 | Orm3    | 0.0000 | No |
| 40174 | Ormdl1  | 0.0000 | No |
| 40175 | Ormdl2  | 0.0000 | No |
| 40176 | Ormdl3  | 0.0000 | No |
| 40177 | Osbp    | 0.0000 | No |
| 40178 | Osbp2   | 0.0000 | No |
| 40179 | Osbpl10 | 0.0000 | No |
| 40180 | Osbpl11 | 0.0000 | No |
| 40181 | Osbpl1a | 0.0000 | No |
| 40182 | Osbpl2  | 0.0000 | No |
| 40183 | Osbpl3  | 0.0000 | No |
| 40184 | Osbpl6  | 0.0000 | No |
| 40185 | Osbpl7  | 0.0000 | No |
| 40186 | Osbpl8  | 0.0000 | No |
| 40187 | Osbpl9  | 0.0000 | No |
| 40188 | Oscar   | 0.0000 | No |
| 40189 | Oscpl   | 0.0000 | No |
| 40190 | Oser1   | 0.0000 | No |
| 40191 | Osgep   | 0.0000 | No |
| 40192 | Osgep1  | 0.0000 | No |
| 40193 | Osgin1  | 0.0000 | No |
| 40194 | Osgin2  | 0.0000 | No |
| 40195 | Osm     | 0.0000 | No |
| 40196 | Osmr    | 0.0000 | No |
| 40197 | Osr1    | 0.0000 | No |
| 40198 | Osr2    | 0.0000 | No |
| 40199 | Ost4    | 0.0000 | No |
| 40200 | Ostc    | 0.0000 | No |
| 40201 | Ostf1   | 0.0000 | No |

|       |         |        |    |
|-------|---------|--------|----|
| 40202 | Ostm1   | 0.0000 | No |
| 40203 | Ostn    | 0.0000 | No |
| 40204 | Otc     | 0.0000 | No |
| 40205 | Otoa    | 0.0000 | No |
| 40206 | Otog    | 0.0000 | No |
| 40207 | Otogl   | 0.0000 | No |
| 40208 | Otol1   | 0.0000 | No |
| 40209 | Otop1   | 0.0000 | No |
| 40210 | Otop2   | 0.0000 | No |
| 40211 | Otop3   | 0.0000 | No |
| 40212 | Otor    | 0.0000 | No |
| 40213 | Otos    | 0.0000 | No |
| 40214 | Otp     | 0.0000 | No |
| 40215 | Ott     | 0.0000 | No |
| 40216 | Otub1   | 0.0000 | No |
| 40217 | Otub2   | 0.0000 | No |
| 40218 | Otud1   | 0.0000 | No |
| 40219 | Otud3   | 0.0000 | No |
| 40220 | Otud4   | 0.0000 | No |
| 40221 | Otud5   | 0.0000 | No |
| 40222 | Otud6b  | 0.0000 | No |
| 40223 | Otud7a  | 0.0000 | No |
| 40224 | Otud7b  | 0.0000 | No |
| 40225 | Otulin  | 0.0000 | No |
| 40226 | Otx1    | 0.0000 | No |
| 40227 | Otx2    | 0.0000 | No |
| 40228 | Otx2os1 | 0.0000 | No |
| 40229 | Ovca2   | 0.0000 | No |
| 40230 | Ovch2   | 0.0000 | No |
| 40231 | Ovgp1   | 0.0000 | No |
| 40232 | Ovol1   | 0.0000 | No |
| 40233 | Ovol2   | 0.0000 | No |
| 40234 | Ovol3   | 0.0000 | No |
| 40235 | Oxa11   | 0.0000 | No |
| 40236 | Oxct1   | 0.0000 | No |
| 40237 | Oxct2a  | 0.0000 | No |
| 40238 | Oxgr1   | 0.0000 | No |
| 40239 | Oxld1   | 0.0000 | No |
| 40240 | Oxnad1  | 0.0000 | No |
| 40241 | Oxr1    | 0.0000 | No |
| 40242 | Oxsm    | 0.0000 | No |
| 40243 | Oxsr1   | 0.0000 | No |
| 40244 | Oxt     | 0.0000 | No |
| 40245 | Oxtr    | 0.0000 | No |
| 40246 | P2rx1   | 0.0000 | No |
| 40247 | P2rx2   | 0.0000 | No |

|       |              |        |    |
|-------|--------------|--------|----|
| 40248 | P2rx3        | 0.0000 | No |
| 40249 | P2rx4        | 0.0000 | No |
| 40250 | P2rx5        | 0.0000 | No |
| 40251 | P2rx6        | 0.0000 | No |
| 40252 | P2rx7        | 0.0000 | No |
| 40253 | P2ry10       | 0.0000 | No |
| 40254 | P2ry12       | 0.0000 | No |
| 40255 | P2ry13       | 0.0000 | No |
| 40256 | P2ry14       | 0.0000 | No |
| 40257 | P2ry2        | 0.0000 | No |
| 40258 | P2ry4        | 0.0000 | No |
| 40259 | P2ry6        | 0.0000 | No |
| 40260 | P3h1         | 0.0000 | No |
| 40261 | P3h3         | 0.0000 | No |
| 40262 | P3h4         | 0.0000 | No |
| 40263 | P4ha1        | 0.0000 | No |
| 40264 | P4ha2        | 0.0000 | No |
| 40265 | P4ha3        | 0.0000 | No |
| 40266 | P4hb         | 0.0000 | No |
| 40267 | P4htm        | 0.0000 | No |
| 40268 | Pa2g4        | 0.0000 | No |
| 40269 | Pabpc1       | 0.0000 | No |
| 40270 | Pabpc11      | 0.0000 | No |
| 40271 | Pabpc112a-ps | 0.0000 | No |
| 40272 | Pabpc112b-ps | 0.0000 | No |
| 40273 | Pabpc2       | 0.0000 | No |
| 40274 | Pabpc4       | 0.0000 | No |
| 40275 | Pabpc4l      | 0.0000 | No |
| 40276 | Pabpc5       | 0.0000 | No |
| 40277 | Pabpn1       | 0.0000 | No |
| 40278 | Pabpn11      | 0.0000 | No |
| 40279 | Pacrg        | 0.0000 | No |
| 40280 | Pacs1        | 0.0000 | No |
| 40281 | Pacs2        | 0.0000 | No |
| 40282 | Pacsin1      | 0.0000 | No |
| 40283 | Pacsin2      | 0.0000 | No |
| 40284 | Pacsin3      | 0.0000 | No |
| 40285 | Padi1        | 0.0000 | No |
| 40286 | Padi2        | 0.0000 | No |
| 40287 | Padi3        | 0.0000 | No |
| 40288 | Padi4        | 0.0000 | No |
| 40289 | Padi6        | 0.0000 | No |
| 40290 | Paf1         | 0.0000 | No |
| 40291 | Pafah1b1     | 0.0000 | No |
| 40292 | Pafah1b1-ps1 | 0.0000 | No |
| 40293 | Pafah1b2     | 0.0000 | No |

|       |          |        |    |
|-------|----------|--------|----|
| 40294 | Pafah1b3 | 0.0000 | No |
| 40295 | Pafah2   | 0.0000 | No |
| 40296 | Pag1     | 0.0000 | No |
| 40297 | Pagr1a   | 0.0000 | No |
| 40298 | Pagr1b   | 0.0000 | No |
| 40299 | Pah      | 0.0000 | No |
| 40300 | Paics    | 0.0000 | No |
| 40301 | Paip1    | 0.0000 | No |
| 40302 | Paip2    | 0.0000 | No |
| 40303 | Paip2b   | 0.0000 | No |
| 40304 | Pak1     | 0.0000 | No |
| 40305 | Pak2     | 0.0000 | No |
| 40306 | Pak3     | 0.0000 | No |
| 40307 | Pak4     | 0.0000 | No |
| 40308 | Pak6     | 0.0000 | No |
| 40309 | Pak7     | 0.0000 | No |
| 40310 | Pakap    | 0.0000 | No |
| 40311 | Palb2    | 0.0000 | No |
| 40312 | Pald1    | 0.0000 | No |
| 40313 | Palm     | 0.0000 | No |
| 40314 | Palm2    | 0.0000 | No |
| 40315 | Palm3    | 0.0000 | No |
| 40316 | Palmd    | 0.0000 | No |
| 40317 | Pam      | 0.0000 | No |
| 40318 | Pam16    | 0.0000 | No |
| 40319 | Pamr1    | 0.0000 | No |
| 40320 | Pan2     | 0.0000 | No |
| 40321 | Pan3     | 0.0000 | No |
| 40322 | Pank1    | 0.0000 | No |
| 40323 | Pank2    | 0.0000 | No |
| 40324 | Pank3    | 0.0000 | No |
| 40325 | Pank4    | 0.0000 | No |
| 40326 | Pantr1   | 0.0000 | No |
| 40327 | Pantr2   | 0.0000 | No |
| 40328 | Panx1    | 0.0000 | No |
| 40329 | Panx2    | 0.0000 | No |
| 40330 | Panx3    | 0.0000 | No |
| 40331 | Paox     | 0.0000 | No |
| 40332 | Papd4    | 0.0000 | No |
| 40333 | Papd5    | 0.0000 | No |
| 40334 | Papd7    | 0.0000 | No |
| 40335 | Papln    | 0.0000 | No |
| 40336 | Papola   | 0.0000 | No |
| 40337 | Papolg   | 0.0000 | No |
| 40338 | Pappa    | 0.0000 | No |
| 40339 | Pappa2   | 0.0000 | No |

|       |           |        |    |
|-------|-----------|--------|----|
| 40340 | Papss1    | 0.0000 | No |
| 40341 | Papss2    | 0.0000 | No |
| 40342 | Paqr3     | 0.0000 | No |
| 40343 | Paqr4     | 0.0000 | No |
| 40344 | Paqr5     | 0.0000 | No |
| 40345 | Paqr6     | 0.0000 | No |
| 40346 | Paqr7     | 0.0000 | No |
| 40347 | Paqr8     | 0.0000 | No |
| 40348 | Pard3     | 0.0000 | No |
| 40349 | Pard3b    | 0.0000 | No |
| 40350 | Pard3bos1 | 0.0000 | No |
| 40351 | Pard6a    | 0.0000 | No |
| 40352 | Pard6b    | 0.0000 | No |
| 40353 | Pard6g    | 0.0000 | No |
| 40354 | Parg      | 0.0000 | No |
| 40355 | Park7     | 0.0000 | No |
| 40356 | Parl      | 0.0000 | No |
| 40357 | Parm1     | 0.0000 | No |
| 40358 | Parn      | 0.0000 | No |
| 40359 | Parp1     | 0.0000 | No |
| 40360 | Parp10    | 0.0000 | No |
| 40361 | Parp11    | 0.0000 | No |
| 40362 | Parp12    | 0.0000 | No |
| 40363 | Parp14    | 0.0000 | No |
| 40364 | Parp16    | 0.0000 | No |
| 40365 | Parp2     | 0.0000 | No |
| 40366 | Parp3     | 0.0000 | No |
| 40367 | Parp4     | 0.0000 | No |
| 40368 | Parp6     | 0.0000 | No |
| 40369 | Parp8     | 0.0000 | No |
| 40370 | Parp9     | 0.0000 | No |
| 40371 | Parpbp    | 0.0000 | No |
| 40372 | Pars2     | 0.0000 | No |
| 40373 | Particl   | 0.0000 | No |
| 40374 | Parva     | 0.0000 | No |
| 40375 | Parvaos   | 0.0000 | No |
| 40376 | Parvb     | 0.0000 | No |
| 40377 | Parvg     | 0.0000 | No |
| 40378 | Pask      | 0.0000 | No |
| 40379 | Pate2     | 0.0000 | No |
| 40380 | Pate3     | 0.0000 | No |
| 40381 | Pate4     | 0.0000 | No |
| 40382 | Patj      | 0.0000 | No |
| 40383 | Patl1     | 0.0000 | No |
| 40384 | Patl2     | 0.0000 | No |
| 40385 | Patz1     | 0.0000 | No |

|       |         |        |    |
|-------|---------|--------|----|
| 40386 | Paupar  | 0.0000 | No |
| 40387 | Pawr    | 0.0000 | No |
| 40388 | Pax1    | 0.0000 | No |
| 40389 | Pax2    | 0.0000 | No |
| 40390 | Pax3    | 0.0000 | No |
| 40391 | Pax4    | 0.0000 | No |
| 40392 | Pax6    | 0.0000 | No |
| 40393 | Pax6os1 | 0.0000 | No |
| 40394 | Pax7    | 0.0000 | No |
| 40395 | Pax8    | 0.0000 | No |
| 40396 | Pax9    | 0.0000 | No |
| 40397 | Paxbp1  | 0.0000 | No |
| 40398 | Paxip1  | 0.0000 | No |
| 40399 | Pbdc1   | 0.0000 | No |
| 40400 | Pbk     | 0.0000 | No |
| 40401 | Pbld2   | 0.0000 | No |
| 40402 | Pbp2    | 0.0000 | No |
| 40403 | Pbrm1   | 0.0000 | No |
| 40404 | Pbsn    | 0.0000 | No |
| 40405 | Pbx2    | 0.0000 | No |
| 40406 | Pbx4    | 0.0000 | No |
| 40407 | Pbxip1  | 0.0000 | No |
| 40408 | Pcbd2   | 0.0000 | No |
| 40409 | Pcbp1   | 0.0000 | No |
| 40410 | Pcbp2   | 0.0000 | No |
| 40411 | Pcbp3   | 0.0000 | No |
| 40412 | Pcbp4   | 0.0000 | No |
| 40413 | Pcca    | 0.0000 | No |
| 40414 | Pccb    | 0.0000 | No |
| 40415 | Pcdh1   | 0.0000 | No |
| 40416 | Pcdh10  | 0.0000 | No |
| 40417 | Pcdh11x | 0.0000 | No |
| 40418 | Pcdh12  | 0.0000 | No |
| 40419 | Pcdh15  | 0.0000 | No |
| 40420 | Pcdh17  | 0.0000 | No |
| 40421 | Pcdh18  | 0.0000 | No |
| 40422 | Pcdh19  | 0.0000 | No |
| 40423 | Pcdh20  | 0.0000 | No |
| 40424 | Pcdh7   | 0.0000 | No |
| 40425 | Pcdh8   | 0.0000 | No |
| 40426 | Pcdh9   | 0.0000 | No |
| 40427 | Pcdha1  | 0.0000 | No |
| 40428 | Pcdha11 | 0.0000 | No |
| 40429 | Pcdha12 | 0.0000 | No |
| 40430 | Pcdha2  | 0.0000 | No |
| 40431 | Pcdha3  | 0.0000 | No |

|       |           |        |    |
|-------|-----------|--------|----|
| 40432 | Pcdha4    | 0.0000 | No |
| 40433 | Pcdha5    | 0.0000 | No |
| 40434 | Pcdha6    | 0.0000 | No |
| 40435 | Pcdha9    | 0.0000 | No |
| 40436 | Pcdhac1   | 0.0000 | No |
| 40437 | Pcdhac2   | 0.0000 | No |
| 40438 | Pcdhb1    | 0.0000 | No |
| 40439 | Pcdhb10   | 0.0000 | No |
| 40440 | Pcdhb13   | 0.0000 | No |
| 40441 | Pcdhb14   | 0.0000 | No |
| 40442 | Pcdhb16   | 0.0000 | No |
| 40443 | Pcdhb17   | 0.0000 | No |
| 40444 | Pcdhb18   | 0.0000 | No |
| 40445 | Pcdhb19   | 0.0000 | No |
| 40446 | Pcdhb20   | 0.0000 | No |
| 40447 | Pcdhb21   | 0.0000 | No |
| 40448 | Pcdhb22   | 0.0000 | No |
| 40449 | Pcdhb3    | 0.0000 | No |
| 40450 | Pcdhb6    | 0.0000 | No |
| 40451 | Pcdhb7    | 0.0000 | No |
| 40452 | Pcdhb8    | 0.0000 | No |
| 40453 | Pcdhb9    | 0.0000 | No |
| 40454 | Pcdhga10  | 0.0000 | No |
| 40455 | Pcdhga11  | 0.0000 | No |
| 40456 | Pcdhga12  | 0.0000 | No |
| 40457 | Pcdhga2   | 0.0000 | No |
| 40458 | Pcdhga3   | 0.0000 | No |
| 40459 | Pcdhga5   | 0.0000 | No |
| 40460 | Pcdhga7   | 0.0000 | No |
| 40461 | Pcdhga8   | 0.0000 | No |
| 40462 | Pcdhga9   | 0.0000 | No |
| 40463 | Pcdhgb1   | 0.0000 | No |
| 40464 | Pcdhgb4   | 0.0000 | No |
| 40465 | Pcdhgb5   | 0.0000 | No |
| 40466 | Pcdhgb6   | 0.0000 | No |
| 40467 | Pcdhgb7   | 0.0000 | No |
| 40468 | Pcdhgc3   | 0.0000 | No |
| 40469 | Pcdhgc4   | 0.0000 | No |
| 40470 | Pcdhgc5   | 0.0000 | No |
| 40471 | Pced1a    | 0.0000 | No |
| 40472 | Pced1b    | 0.0000 | No |
| 40473 | Pced1c-ps | 0.0000 | No |
| 40474 | Pcf11     | 0.0000 | No |
| 40475 | Pcgf1     | 0.0000 | No |
| 40476 | Pcgf3     | 0.0000 | No |
| 40477 | Pcgf5     | 0.0000 | No |



|       |          |        |    |
|-------|----------|--------|----|
| 40478 | Pcgf6    | 0.0000 | No |
| 40479 | Pcid2    | 0.0000 | No |
| 40480 | Pcif1    | 0.0000 | No |
| 40481 | Pck1     | 0.0000 | No |
| 40482 | Pck2     | 0.0000 | No |
| 40483 | Pclo     | 0.0000 | No |
| 40484 | Pcm1     | 0.0000 | No |
| 40485 | Pcmt1    | 0.0000 | No |
| 40486 | Pcmtd1   | 0.0000 | No |
| 40487 | Pcmtd2   | 0.0000 | No |
| 40488 | Pcna     | 0.0000 | No |
| 40489 | Pcna-ps2 | 0.0000 | No |
| 40490 | Pcnp     | 0.0000 | No |
| 40491 | Pcnt     | 0.0000 | No |
| 40492 | Pcnx     | 0.0000 | No |
| 40493 | Pcnx2    | 0.0000 | No |
| 40494 | Pcnx3    | 0.0000 | No |
| 40495 | Pcnx4    | 0.0000 | No |
| 40496 | Pcolce   | 0.0000 | No |
| 40497 | Pcp2     | 0.0000 | No |
| 40498 | Pcp4     | 0.0000 | No |
| 40499 | Pcp4l1   | 0.0000 | No |
| 40500 | Pcsk1    | 0.0000 | No |
| 40501 | Pcsk1n   | 0.0000 | No |
| 40502 | Pcsk2    | 0.0000 | No |
| 40503 | Pcsk4    | 0.0000 | No |
| 40504 | Pcsk5    | 0.0000 | No |
| 40505 | Pcsk6    | 0.0000 | No |
| 40506 | Pcsk7    | 0.0000 | No |
| 40507 | Pcx      | 0.0000 | No |
| 40508 | Pcyox1   | 0.0000 | No |
| 40509 | Pcyox1l  | 0.0000 | No |
| 40510 | Pcyt1a   | 0.0000 | No |
| 40511 | Pcyt1b   | 0.0000 | No |
| 40512 | Pcyt2    | 0.0000 | No |
| 40513 | Pdap1    | 0.0000 | No |
| 40514 | Pdc      | 0.0000 | No |
| 40515 | Pded1    | 0.0000 | No |
| 40516 | Pded10   | 0.0000 | No |
| 40517 | Pded11   | 0.0000 | No |
| 40518 | Pded1lg2 | 0.0000 | No |
| 40519 | Pded2    | 0.0000 | No |
| 40520 | Pded2l   | 0.0000 | No |
| 40521 | Pded4    | 0.0000 | No |
| 40522 | Pded5    | 0.0000 | No |
| 40523 | Pded5-ps | 0.0000 | No |

|       |         |        |    |
|-------|---------|--------|----|
| 40524 | Pdcd6   | 0.0000 | No |
| 40525 | Pdcd6ip | 0.0000 | No |
| 40526 | Pdcd7   | 0.0000 | No |
| 40527 | Pdcl    | 0.0000 | No |
| 40528 | Pdcl2   | 0.0000 | No |
| 40529 | Pdcl3   | 0.0000 | No |
| 40530 | Pddc1   | 0.0000 | No |
| 40531 | Pde10a  | 0.0000 | No |
| 40532 | Pde11a  | 0.0000 | No |
| 40533 | Pde12   | 0.0000 | No |
| 40534 | Pde1a   | 0.0000 | No |
| 40535 | Pde1b   | 0.0000 | No |
| 40536 | Pde2a   | 0.0000 | No |
| 40537 | Pde3a   | 0.0000 | No |
| 40538 | Pde3b   | 0.0000 | No |
| 40539 | Pde4b   | 0.0000 | No |
| 40540 | Pde4c   | 0.0000 | No |
| 40541 | Pde4dip | 0.0000 | No |
| 40542 | Pde5a   | 0.0000 | No |
| 40543 | Pde6a   | 0.0000 | No |
| 40544 | Pde6b   | 0.0000 | No |
| 40545 | Pde6c   | 0.0000 | No |
| 40546 | Pde6d   | 0.0000 | No |
| 40547 | Pde6g   | 0.0000 | No |
| 40548 | Pde6h   | 0.0000 | No |
| 40549 | Pde7b   | 0.0000 | No |
| 40550 | Pde8a   | 0.0000 | No |
| 40551 | Pde8b   | 0.0000 | No |
| 40552 | Pde9a   | 0.0000 | No |
| 40553 | Pdf     | 0.0000 | No |
| 40554 | Pdgfa   | 0.0000 | No |
| 40555 | Pdgfc   | 0.0000 | No |
| 40556 | Pdgfd   | 0.0000 | No |
| 40557 | Pdgfra  | 0.0000 | No |
| 40558 | Pdgfrb  | 0.0000 | No |
| 40559 | Pdgfrl  | 0.0000 | No |
| 40560 | Pdha1   | 0.0000 | No |
| 40561 | Pdha2   | 0.0000 | No |
| 40562 | Pdhb    | 0.0000 | No |
| 40563 | Pdhx    | 0.0000 | No |
| 40564 | Pdia2   | 0.0000 | No |
| 40565 | Pdia3   | 0.0000 | No |
| 40566 | Pdia5   | 0.0000 | No |
| 40567 | Pdia6   | 0.0000 | No |
| 40568 | Pdik11  | 0.0000 | No |
| 40569 | Pdilt   | 0.0000 | No |

|       |          |        |    |
|-------|----------|--------|----|
| 40570 | Pdk1     | 0.0000 | No |
| 40571 | Pdk2     | 0.0000 | No |
| 40572 | Pdk3     | 0.0000 | No |
| 40573 | Pdk4     | 0.0000 | No |
| 40574 | Pdlim1   | 0.0000 | No |
| 40575 | Pdlim2   | 0.0000 | No |
| 40576 | Pdlim5   | 0.0000 | No |
| 40577 | Pdp1     | 0.0000 | No |
| 40578 | Pdp2     | 0.0000 | No |
| 40579 | Pdpk1    | 0.0000 | No |
| 40580 | Pdpn     | 0.0000 | No |
| 40581 | Pdpr     | 0.0000 | No |
| 40582 | Pdrg1    | 0.0000 | No |
| 40583 | Pds5a    | 0.0000 | No |
| 40584 | Pds5b    | 0.0000 | No |
| 40585 | Pdss1    | 0.0000 | No |
| 40586 | Pdss2    | 0.0000 | No |
| 40587 | Pdxdc1   | 0.0000 | No |
| 40588 | Pdxk     | 0.0000 | No |
| 40589 | Pdxk-ps  | 0.0000 | No |
| 40590 | Pdyn     | 0.0000 | No |
| 40591 | Pdzd11   | 0.0000 | No |
| 40592 | Pdzd2    | 0.0000 | No |
| 40593 | Pdzd3    | 0.0000 | No |
| 40594 | Pdzd4    | 0.0000 | No |
| 40595 | Pdzd7    | 0.0000 | No |
| 40596 | Pdzd8    | 0.0000 | No |
| 40597 | Pdzd9    | 0.0000 | No |
| 40598 | Pdzk1    | 0.0000 | No |
| 40599 | Pdzk1ip1 | 0.0000 | No |
| 40600 | Pdzph1   | 0.0000 | No |
| 40601 | Pdzrn3   | 0.0000 | No |
| 40602 | Pdzrn4   | 0.0000 | No |
| 40603 | Pea15b   | 0.0000 | No |
| 40604 | Peak1    | 0.0000 | No |
| 40605 | Peak1os  | 0.0000 | No |
| 40606 | Pebp1    | 0.0000 | No |
| 40607 | Pebp4    | 0.0000 | No |
| 40608 | Pecam1   | 0.0000 | No |
| 40609 | Pecr     | 0.0000 | No |
| 40610 | Pef1     | 0.0000 | No |
| 40611 | Peg10    | 0.0000 | No |
| 40612 | Peg3     | 0.0000 | No |
| 40613 | Peli1    | 0.0000 | No |
| 40614 | Peli2    | 0.0000 | No |
| 40615 | Peli3    | 0.0000 | No |

|       |          |        |    |
|-------|----------|--------|----|
| 40616 | Pelo     | 0.0000 | No |
| 40617 | Pelp1    | 0.0000 | No |
| 40618 | Pemt     | 0.0000 | No |
| 40619 | Penk     | 0.0000 | No |
| 40620 | Pepd     | 0.0000 | No |
| 40621 | Per1     | 0.0000 | No |
| 40622 | Per3     | 0.0000 | No |
| 40623 | Perm1    | 0.0000 | No |
| 40624 | Pes1     | 0.0000 | No |
| 40625 | Pet100   | 0.0000 | No |
| 40626 | Pet117   | 0.0000 | No |
| 40627 | Pet2     | 0.0000 | No |
| 40628 | Pex1     | 0.0000 | No |
| 40629 | Pex10    | 0.0000 | No |
| 40630 | Pex11a   | 0.0000 | No |
| 40631 | Pex11b   | 0.0000 | No |
| 40632 | Pex11g   | 0.0000 | No |
| 40633 | Pex12    | 0.0000 | No |
| 40634 | Pex13    | 0.0000 | No |
| 40635 | Pex13-ps | 0.0000 | No |
| 40636 | Pex14    | 0.0000 | No |
| 40637 | Pex16    | 0.0000 | No |
| 40638 | Pex19    | 0.0000 | No |
| 40639 | Pex26    | 0.0000 | No |
| 40640 | Pex3     | 0.0000 | No |
| 40641 | Pex5     | 0.0000 | No |
| 40642 | Pex5l    | 0.0000 | No |
| 40643 | Pex6     | 0.0000 | No |
| 40644 | Pex7     | 0.0000 | No |
| 40645 | Pf4      | 0.0000 | No |
| 40646 | Pfas     | 0.0000 | No |
| 40647 | Pfdn1    | 0.0000 | No |
| 40648 | Pfdn2    | 0.0000 | No |
| 40649 | Pfdn4    | 0.0000 | No |
| 40650 | Pfdn5    | 0.0000 | No |
| 40651 | Pfdn6    | 0.0000 | No |
| 40652 | Pfkfb1   | 0.0000 | No |
| 40653 | Pfkfb2   | 0.0000 | No |
| 40654 | Pfkfb3   | 0.0000 | No |
| 40655 | Pfkfb4   | 0.0000 | No |
| 40656 | Pfkl     | 0.0000 | No |
| 40657 | Pfkm     | 0.0000 | No |
| 40658 | Pfkp     | 0.0000 | No |
| 40659 | Pfn1     | 0.0000 | No |
| 40660 | Pfn2     | 0.0000 | No |
| 40661 | Pfn4     | 0.0000 | No |

|       |           |        |    |
|-------|-----------|--------|----|
| 40662 | Pgam1     | 0.0000 | No |
| 40663 | Pgam1-ps1 | 0.0000 | No |
| 40664 | Pgam2     | 0.0000 | No |
| 40665 | Pgam5     | 0.0000 | No |
| 40666 | Pgap1     | 0.0000 | No |
| 40667 | Pgap2     | 0.0000 | No |
| 40668 | Pgap3     | 0.0000 | No |
| 40669 | Pgbd1     | 0.0000 | No |
| 40670 | Pgbd5     | 0.0000 | No |
| 40671 | Pgc       | 0.0000 | No |
| 40672 | Pgd       | 0.0000 | No |
| 40673 | Pgghg     | 0.0000 | No |
| 40674 | Pggt1b    | 0.0000 | No |
| 40675 | Pgk1      | 0.0000 | No |
| 40676 | Pgk1-ps3  | 0.0000 | No |
| 40677 | Pgk1-rs7  | 0.0000 | No |
| 40678 | Pgk2      | 0.0000 | No |
| 40679 | Pgls      | 0.0000 | No |
| 40680 | Pglyrp1   | 0.0000 | No |
| 40681 | Pglyrp2   | 0.0000 | No |
| 40682 | Pglyrp3   | 0.0000 | No |
| 40683 | Pglyrp4   | 0.0000 | No |
| 40684 | Pgm1      | 0.0000 | No |
| 40685 | Pgm2      | 0.0000 | No |
| 40686 | Pgm211    | 0.0000 | No |
| 40687 | Pgm3      | 0.0000 | No |
| 40688 | Pgp       | 0.0000 | No |
| 40689 | Pgpep1    | 0.0000 | No |
| 40690 | Pgr       | 0.0000 | No |
| 40691 | Pgr15l    | 0.0000 | No |
| 40692 | Pgrmc1    | 0.0000 | No |
| 40693 | Pgrmc2    | 0.0000 | No |
| 40694 | Pgs1      | 0.0000 | No |
| 40695 | Phactr1   | 0.0000 | No |
| 40696 | Phactr2   | 0.0000 | No |
| 40697 | Phactr4   | 0.0000 | No |
| 40698 | Phax      | 0.0000 | No |
| 40699 | Phb       | 0.0000 | No |
| 40700 | Phb2      | 0.0000 | No |
| 40701 | Phc1      | 0.0000 | No |
| 40702 | Phc2      | 0.0000 | No |
| 40703 | Phc3      | 0.0000 | No |
| 40704 | Phex      | 0.0000 | No |
| 40705 | Phf1      | 0.0000 | No |
| 40706 | Phf10     | 0.0000 | No |
| 40707 | Phf11a    | 0.0000 | No |

|       |           |        |    |
|-------|-----------|--------|----|
| 40708 | Phf11b    | 0.0000 | No |
| 40709 | Phf11c    | 0.0000 | No |
| 40710 | Phf11d    | 0.0000 | No |
| 40711 | Phf12     | 0.0000 | No |
| 40712 | Phf13     | 0.0000 | No |
| 40713 | Phf14     | 0.0000 | No |
| 40714 | Phf19     | 0.0000 | No |
| 40715 | Phf2      | 0.0000 | No |
| 40716 | Phf20     | 0.0000 | No |
| 40717 | Phf2011   | 0.0000 | No |
| 40718 | Phf20-ps  | 0.0000 | No |
| 40719 | Phf21a    | 0.0000 | No |
| 40720 | Phf21b    | 0.0000 | No |
| 40721 | Phf23     | 0.0000 | No |
| 40722 | Phf2os1   | 0.0000 | No |
| 40723 | Phf3      | 0.0000 | No |
| 40724 | Phf5a     | 0.0000 | No |
| 40725 | Phf6      | 0.0000 | No |
| 40726 | Phf7      | 0.0000 | No |
| 40727 | Phf8      | 0.0000 | No |
| 40728 | Phgdh-ps1 | 0.0000 | No |
| 40729 | Phip      | 0.0000 | No |
| 40730 | Phka2     | 0.0000 | No |
| 40731 | Phkb      | 0.0000 | No |
| 40732 | Phkg1     | 0.0000 | No |
| 40733 | Phkg2     | 0.0000 | No |
| 40734 | Phlda1    | 0.0000 | No |
| 40735 | Phlda3    | 0.0000 | No |
| 40736 | Phldb1    | 0.0000 | No |
| 40737 | Phldb2    | 0.0000 | No |
| 40738 | Phldb3    | 0.0000 | No |
| 40739 | Phlpp1    | 0.0000 | No |
| 40740 | Phlpp2    | 0.0000 | No |
| 40741 | Phospho2  | 0.0000 | No |
| 40742 | Phox2a    | 0.0000 | No |
| 40743 | Phox2b    | 0.0000 | No |
| 40744 | Phpt1     | 0.0000 | No |
| 40745 | Phrf1     | 0.0000 | No |
| 40746 | Phtf1os   | 0.0000 | No |
| 40747 | Phtf2     | 0.0000 | No |
| 40748 | Phxr2     | 0.0000 | No |
| 40749 | Phxr4     | 0.0000 | No |
| 40750 | Phyh      | 0.0000 | No |
| 40751 | Phyhd1    | 0.0000 | No |
| 40752 | Phyhipl   | 0.0000 | No |
| 40753 | Phykpl    | 0.0000 | No |

|       |         |        |    |
|-------|---------|--------|----|
| 40754 | Pi15    | 0.0000 | No |
| 40755 | Pi16    | 0.0000 | No |
| 40756 | Pi4k2a  | 0.0000 | No |
| 40757 | Pi4k2b  | 0.0000 | No |
| 40758 | Pi4ka   | 0.0000 | No |
| 40759 | Pi4kb   | 0.0000 | No |
| 40760 | Pianp   | 0.0000 | No |
| 40761 | Pias1   | 0.0000 | No |
| 40762 | Pias2   | 0.0000 | No |
| 40763 | Pias4   | 0.0000 | No |
| 40764 | Pibf1   | 0.0000 | No |
| 40765 | Picalm  | 0.0000 | No |
| 40766 | Pick1   | 0.0000 | No |
| 40767 | Pid1    | 0.0000 | No |
| 40768 | Pidd1   | 0.0000 | No |
| 40769 | Piezo1  | 0.0000 | No |
| 40770 | Piezo2  | 0.0000 | No |
| 40771 | Pif1    | 0.0000 | No |
| 40772 | Pifo    | 0.0000 | No |
| 40773 | Piga    | 0.0000 | No |
| 40774 | Pigb    | 0.0000 | No |
| 40775 | Pigc    | 0.0000 | No |
| 40776 | Pigf    | 0.0000 | No |
| 40777 | Pigg    | 0.0000 | No |
| 40778 | Pigh    | 0.0000 | No |
| 40779 | Pigk    | 0.0000 | No |
| 40780 | Pigl    | 0.0000 | No |
| 40781 | Pigm    | 0.0000 | No |
| 40782 | Pign    | 0.0000 | No |
| 40783 | Pigo    | 0.0000 | No |
| 40784 | Pigp    | 0.0000 | No |
| 40785 | Pigq    | 0.0000 | No |
| 40786 | Pigr    | 0.0000 | No |
| 40787 | Pigs    | 0.0000 | No |
| 40788 | Pigt    | 0.0000 | No |
| 40789 | Pigu    | 0.0000 | No |
| 40790 | Pigv    | 0.0000 | No |
| 40791 | Pigw    | 0.0000 | No |
| 40792 | Pigyl   | 0.0000 | No |
| 40793 | Pigz    | 0.0000 | No |
| 40794 | Pih1d1  | 0.0000 | No |
| 40795 | Pih1d2  | 0.0000 | No |
| 40796 | Pih1h3b | 0.0000 | No |
| 40797 | Pik3ap1 | 0.0000 | No |
| 40798 | Pik3c2a | 0.0000 | No |
| 40799 | Pik3c2b | 0.0000 | No |

|       |            |        |    |
|-------|------------|--------|----|
| 40800 | Pik3c2g    | 0.0000 | No |
| 40801 | Pik3c3     | 0.0000 | No |
| 40802 | Pik3ca     | 0.0000 | No |
| 40803 | Pik3cb     | 0.0000 | No |
| 40804 | Pik3cd     | 0.0000 | No |
| 40805 | Pik3cg     | 0.0000 | No |
| 40806 | Pik3ip1    | 0.0000 | No |
| 40807 | Pik3r2     | 0.0000 | No |
| 40808 | Pik3r3     | 0.0000 | No |
| 40809 | Pik3r4     | 0.0000 | No |
| 40810 | Pik3r5     | 0.0000 | No |
| 40811 | Pik3r6     | 0.0000 | No |
| 40812 | Pikfyve    | 0.0000 | No |
| 40813 | Pilra      | 0.0000 | No |
| 40814 | Pilrb1     | 0.0000 | No |
| 40815 | Pim1       | 0.0000 | No |
| 40816 | Pim2       | 0.0000 | No |
| 40817 | Pim3       | 0.0000 | No |
| 40818 | Pin1       | 0.0000 | No |
| 40819 | Pin1rt1    | 0.0000 | No |
| 40820 | Pin4       | 0.0000 | No |
| 40821 | Pink1      | 0.0000 | No |
| 40822 | Pinlyp     | 0.0000 | No |
| 40823 | Pinx1      | 0.0000 | No |
| 40824 | Pip        | 0.0000 | No |
| 40825 | Pip4k2a    | 0.0000 | No |
| 40826 | Pip4k2b    | 0.0000 | No |
| 40827 | Pip4k2c    | 0.0000 | No |
| 40828 | Pip5k1a    | 0.0000 | No |
| 40829 | Pip5k1b    | 0.0000 | No |
| 40830 | Pip5k1bos  | 0.0000 | No |
| 40831 | Pip5k1c    | 0.0000 | No |
| 40832 | Pip5k1l    | 0.0000 | No |
| 40833 | Pipox      | 0.0000 | No |
| 40834 | Pir        | 0.0000 | No |
| 40835 | Pirb       | 0.0000 | No |
| 40836 | Pisd       | 0.0000 | No |
| 40837 | Pisd-ps1   | 0.0000 | No |
| 40838 | Pisd-ps2   | 0.0000 | No |
| 40839 | Pisrt1     | 0.0000 | No |
| 40840 | Pithd1     | 0.0000 | No |
| 40841 | Pitpna     | 0.0000 | No |
| 40842 | Pitpnb     | 0.0000 | No |
| 40843 | Pitpnm1    | 0.0000 | No |
| 40844 | Pitpnm2    | 0.0000 | No |
| 40845 | Pitpnm2os1 | 0.0000 | No |



|       |            |        |    |
|-------|------------|--------|----|
| 40846 | Pitpnm2os2 | 0.0000 | No |
| 40847 | Pitpnm3    | 0.0000 | No |
| 40848 | Pitrm1     | 0.0000 | No |
| 40849 | Pitx1      | 0.0000 | No |
| 40850 | Pitx3      | 0.0000 | No |
| 40851 | Piwil1     | 0.0000 | No |
| 40852 | Piwil2     | 0.0000 | No |
| 40853 | Piwil4     | 0.0000 | No |
| 40854 | Pja1       | 0.0000 | No |
| 40855 | Pja2       | 0.0000 | No |
| 40856 | Pkd1       | 0.0000 | No |
| 40857 | Pkd111     | 0.0000 | No |
| 40858 | Pkd113     | 0.0000 | No |
| 40859 | Pkd212     | 0.0000 | No |
| 40860 | Pkdcc      | 0.0000 | No |
| 40861 | Pkdrej     | 0.0000 | No |
| 40862 | Pkhd1      | 0.0000 | No |
| 40863 | Pkhd111    | 0.0000 | No |
| 40864 | Pkm        | 0.0000 | No |
| 40865 | Pkmyt1     | 0.0000 | No |
| 40866 | Pkn1       | 0.0000 | No |
| 40867 | Pkn2       | 0.0000 | No |
| 40868 | Pkn3       | 0.0000 | No |
| 40869 | Pknox1     | 0.0000 | No |
| 40870 | Pknox2     | 0.0000 | No |
| 40871 | Pkp1       | 0.0000 | No |
| 40872 | Pkp3       | 0.0000 | No |
| 40873 | Pkp4       | 0.0000 | No |
| 40874 | Pla1a      | 0.0000 | No |
| 40875 | Pla2g10    | 0.0000 | No |
| 40876 | Pla2g10os  | 0.0000 | No |
| 40877 | Pla2g12a   | 0.0000 | No |
| 40878 | Pla2g12b   | 0.0000 | No |
| 40879 | Pla2g15    | 0.0000 | No |
| 40880 | Pla2g16    | 0.0000 | No |
| 40881 | Pla2g2a    | 0.0000 | No |
| 40882 | Pla2g2c    | 0.0000 | No |
| 40883 | Pla2g2d    | 0.0000 | No |
| 40884 | Pla2g2e    | 0.0000 | No |
| 40885 | Pla2g2f    | 0.0000 | No |
| 40886 | Pla2g3     | 0.0000 | No |
| 40887 | Pla2g4a    | 0.0000 | No |
| 40888 | Pla2g4b    | 0.0000 | No |
| 40889 | Pla2g4c    | 0.0000 | No |
| 40890 | Pla2g4c-ps | 0.0000 | No |
| 40891 | Pla2g4d    | 0.0000 | No |

|       |         |        |    |
|-------|---------|--------|----|
| 40892 | Pla2g4e | 0.0000 | No |
| 40893 | Pla2g4f | 0.0000 | No |
| 40894 | Pla2g5  | 0.0000 | No |
| 40895 | Pla2g6  | 0.0000 | No |
| 40896 | Plaa    | 0.0000 | No |
| 40897 | Plac1   | 0.0000 | No |
| 40898 | Plac8   | 0.0000 | No |
| 40899 | Plac811 | 0.0000 | No |
| 40900 | Plac9a  | 0.0000 | No |
| 40901 | Plac9b  | 0.0000 | No |
| 40902 | Plag1   | 0.0000 | No |
| 40903 | Plagl1  | 0.0000 | No |
| 40904 | Plagl2  | 0.0000 | No |
| 40905 | Plat    | 0.0000 | No |
| 40906 | Platr1  | 0.0000 | No |
| 40907 | Platr10 | 0.0000 | No |
| 40908 | Platr11 | 0.0000 | No |
| 40909 | Platr12 | 0.0000 | No |
| 40910 | Platr15 | 0.0000 | No |
| 40911 | Platr16 | 0.0000 | No |
| 40912 | Platr19 | 0.0000 | No |
| 40913 | Platr2  | 0.0000 | No |
| 40914 | Platr21 | 0.0000 | No |
| 40915 | Platr22 | 0.0000 | No |
| 40916 | Platr23 | 0.0000 | No |
| 40917 | Platr25 | 0.0000 | No |
| 40918 | Platr27 | 0.0000 | No |
| 40919 | Platr28 | 0.0000 | No |
| 40920 | Platr29 | 0.0000 | No |
| 40921 | Platr30 | 0.0000 | No |
| 40922 | Platr31 | 0.0000 | No |
| 40923 | Platr32 | 0.0000 | No |
| 40924 | Platr4  | 0.0000 | No |
| 40925 | Platr5  | 0.0000 | No |
| 40926 | Platr6  | 0.0000 | No |
| 40927 | Platr8  | 0.0000 | No |
| 40928 | Plau    | 0.0000 | No |
| 40929 | Plaur   | 0.0000 | No |
| 40930 | Plb1    | 0.0000 | No |
| 40931 | Plbd1   | 0.0000 | No |
| 40932 | Plbd2   | 0.0000 | No |
| 40933 | Plcb1   | 0.0000 | No |
| 40934 | Plcb2   | 0.0000 | No |
| 40935 | Plcb3   | 0.0000 | No |
| 40936 | Plcd1   | 0.0000 | No |
| 40937 | Plcd3   | 0.0000 | No |

|       |           |        |    |
|-------|-----------|--------|----|
| 40938 | Plcd4     | 0.0000 | No |
| 40939 | Plce1     | 0.0000 | No |
| 40940 | Plch1     | 0.0000 | No |
| 40941 | Plch2     | 0.0000 | No |
| 40942 | Plcl1     | 0.0000 | No |
| 40943 | Plcl2     | 0.0000 | No |
| 40944 | Plcx1     | 0.0000 | No |
| 40945 | Plcx2     | 0.0000 | No |
| 40946 | Plcx3     | 0.0000 | No |
| 40947 | Plcz1     | 0.0000 | No |
| 40948 | Pld2      | 0.0000 | No |
| 40949 | Pld3      | 0.0000 | No |
| 40950 | Pld5      | 0.0000 | No |
| 40951 | Pld6      | 0.0000 | No |
| 40952 | Pldi      | 0.0000 | No |
| 40953 | Plek      | 0.0000 | No |
| 40954 | Plek2     | 0.0000 | No |
| 40955 | Plekha1   | 0.0000 | No |
| 40956 | Plekha2   | 0.0000 | No |
| 40957 | Plekha3   | 0.0000 | No |
| 40958 | Plekha6   | 0.0000 | No |
| 40959 | Plekha7   | 0.0000 | No |
| 40960 | Plekha8   | 0.0000 | No |
| 40961 | Plekhb1   | 0.0000 | No |
| 40962 | Plekhb2   | 0.0000 | No |
| 40963 | Plekhd1   | 0.0000 | No |
| 40964 | Plekhd1os | 0.0000 | No |
| 40965 | Plekhf2   | 0.0000 | No |
| 40966 | Plekhg1   | 0.0000 | No |
| 40967 | Plekhg2   | 0.0000 | No |
| 40968 | Plekhg3   | 0.0000 | No |
| 40969 | Plekhg4   | 0.0000 | No |
| 40970 | Plekhg6   | 0.0000 | No |
| 40971 | Plekhh1   | 0.0000 | No |
| 40972 | Plekhh2   | 0.0000 | No |
| 40973 | Plekhj1   | 0.0000 | No |
| 40974 | Plekhn1   | 0.0000 | No |
| 40975 | Plekhn2   | 0.0000 | No |
| 40976 | Plekhn3   | 0.0000 | No |
| 40977 | Plekhn1   | 0.0000 | No |
| 40978 | Plekho1   | 0.0000 | No |
| 40979 | Plekhs1   | 0.0000 | No |
| 40980 | Plet1     | 0.0000 | No |
| 40981 | Plet1os   | 0.0000 | No |
| 40982 | Plg       | 0.0000 | No |
| 40983 | Plgrkt    | 0.0000 | No |

|       |           |        |    |
|-------|-----------|--------|----|
| 40984 | Plin1     | 0.0000 | No |
| 40985 | Plin2     | 0.0000 | No |
| 40986 | Plin3     | 0.0000 | No |
| 40987 | Plin4     | 0.0000 | No |
| 40988 | Plk1      | 0.0000 | No |
| 40989 | Plk2      | 0.0000 | No |
| 40990 | Plk3      | 0.0000 | No |
| 40991 | Plk4      | 0.0000 | No |
| 40992 | Plk5      | 0.0000 | No |
| 40993 | Plk-ps1   | 0.0000 | No |
| 40994 | Pln       | 0.0000 | No |
| 40995 | Plod1     | 0.0000 | No |
| 40996 | Plod3     | 0.0000 | No |
| 40997 | Plp1      | 0.0000 | No |
| 40998 | Plp2      | 0.0000 | No |
| 40999 | Plpp1     | 0.0000 | No |
| 41000 | Plpp2     | 0.0000 | No |
| 41001 | Plpp3     | 0.0000 | No |
| 41002 | Plpp4     | 0.0000 | No |
| 41003 | Plpp5     | 0.0000 | No |
| 41004 | Plpp6     | 0.0000 | No |
| 41005 | Plpp7     | 0.0000 | No |
| 41006 | Plppr1    | 0.0000 | No |
| 41007 | Plppr2    | 0.0000 | No |
| 41008 | Plppr3    | 0.0000 | No |
| 41009 | Plppr4    | 0.0000 | No |
| 41010 | Plppr5    | 0.0000 | No |
| 41011 | Plrg1     | 0.0000 | No |
| 41012 | Pls1      | 0.0000 | No |
| 41013 | Pls3      | 0.0000 | No |
| 41014 | Plscr3    | 0.0000 | No |
| 41015 | Pltp      | 0.0000 | No |
| 41016 | Plvap     | 0.0000 | No |
| 41017 | Plxdc1    | 0.0000 | No |
| 41018 | Plxdc2    | 0.0000 | No |
| 41019 | Plxna1    | 0.0000 | No |
| 41020 | Plxna2    | 0.0000 | No |
| 41021 | Plxna4    | 0.0000 | No |
| 41022 | Plxna4os1 | 0.0000 | No |
| 41023 | Plxna4os2 | 0.0000 | No |
| 41024 | Plxna4os3 | 0.0000 | No |
| 41025 | Plxnb1    | 0.0000 | No |
| 41026 | Plxnb2    | 0.0000 | No |
| 41027 | Plxnb3    | 0.0000 | No |
| 41028 | Plxnc1    | 0.0000 | No |
| 41029 | Plxnd1    | 0.0000 | No |

|       |          |        |    |
|-------|----------|--------|----|
| 41030 | Pm20d1   | 0.0000 | No |
| 41031 | Pmaip1   | 0.0000 | No |
| 41032 | Pmch     | 0.0000 | No |
| 41033 | Pmel     | 0.0000 | No |
| 41034 | Pmepa1   | 0.0000 | No |
| 41035 | Pmf1     | 0.0000 | No |
| 41036 | Pmfbp1   | 0.0000 | No |
| 41037 | Pml      | 0.0000 | No |
| 41038 | Pmm1     | 0.0000 | No |
| 41039 | Pmpca    | 0.0000 | No |
| 41040 | Pmpcb    | 0.0000 | No |
| 41041 | Pms1     | 0.0000 | No |
| 41042 | Pms2     | 0.0000 | No |
| 41043 | Pmvk     | 0.0000 | No |
| 41044 | Pnlsr    | 0.0000 | No |
| 41045 | Pnkd     | 0.0000 | No |
| 41046 | Pnkp     | 0.0000 | No |
| 41047 | Pnlde1   | 0.0000 | No |
| 41048 | Pnlip    | 0.0000 | No |
| 41049 | Pnliprp1 | 0.0000 | No |
| 41050 | Pnliprp2 | 0.0000 | No |
| 41051 | Pnma1    | 0.0000 | No |
| 41052 | Pnma2    | 0.0000 | No |
| 41053 | Pnma3    | 0.0000 | No |
| 41054 | Pnma5    | 0.0000 | No |
| 41055 | Pnmal2   | 0.0000 | No |
| 41056 | Pnn      | 0.0000 | No |
| 41057 | Pno1     | 0.0000 | No |
| 41058 | Pnoc     | 0.0000 | No |
| 41059 | Pnp      | 0.0000 | No |
| 41060 | Pnp2     | 0.0000 | No |
| 41061 | Pnpla1os | 0.0000 | No |
| 41062 | Pnpla2   | 0.0000 | No |
| 41063 | Pnpla3   | 0.0000 | No |
| 41064 | Pnpla6   | 0.0000 | No |
| 41065 | Pnpla7   | 0.0000 | No |
| 41066 | Pnpla8   | 0.0000 | No |
| 41067 | Pnpo     | 0.0000 | No |
| 41068 | Pnpt1    | 0.0000 | No |
| 41069 | Pnrc1    | 0.0000 | No |
| 41070 | Pnrc2    | 0.0000 | No |
| 41071 | Poc1a    | 0.0000 | No |
| 41072 | Poc1b    | 0.0000 | No |
| 41073 | Poc5     | 0.0000 | No |
| 41074 | Podn     | 0.0000 | No |
| 41075 | Podxl    | 0.0000 | No |

|       |           |        |    |
|-------|-----------|--------|----|
| 41076 | Podx12    | 0.0000 | No |
| 41077 | Pof1b     | 0.0000 | No |
| 41078 | Pofut1    | 0.0000 | No |
| 41079 | Pofut2    | 0.0000 | No |
| 41080 | Pogk      | 0.0000 | No |
| 41081 | Poglut1   | 0.0000 | No |
| 41082 | Pogz      | 0.0000 | No |
| 41083 | Pola1     | 0.0000 | No |
| 41084 | Pola2     | 0.0000 | No |
| 41085 | Polb      | 0.0000 | No |
| 41086 | Pold1     | 0.0000 | No |
| 41087 | Pold2     | 0.0000 | No |
| 41088 | Pold3     | 0.0000 | No |
| 41089 | Pold4     | 0.0000 | No |
| 41090 | Poldip2   | 0.0000 | No |
| 41091 | Poldip3   | 0.0000 | No |
| 41092 | Pole      | 0.0000 | No |
| 41093 | Pole2     | 0.0000 | No |
| 41094 | Pole3     | 0.0000 | No |
| 41095 | Pole4     | 0.0000 | No |
| 41096 | Polg      | 0.0000 | No |
| 41097 | Polg2     | 0.0000 | No |
| 41098 | Polh      | 0.0000 | No |
| 41099 | Poli      | 0.0000 | No |
| 41100 | Polk      | 0.0000 | No |
| 41101 | Poll      | 0.0000 | No |
| 41102 | Polm      | 0.0000 | No |
| 41103 | Poln      | 0.0000 | No |
| 41104 | Polq      | 0.0000 | No |
| 41105 | Polr1a    | 0.0000 | No |
| 41106 | Polr1b    | 0.0000 | No |
| 41107 | Polr1c    | 0.0000 | No |
| 41108 | Polr1d    | 0.0000 | No |
| 41109 | Polr1e    | 0.0000 | No |
| 41110 | Polr2a    | 0.0000 | No |
| 41111 | Polr2b    | 0.0000 | No |
| 41112 | Polr2c    | 0.0000 | No |
| 41113 | Polr2d    | 0.0000 | No |
| 41114 | Polr2e    | 0.0000 | No |
| 41115 | Polr2f    | 0.0000 | No |
| 41116 | Polr2g    | 0.0000 | No |
| 41117 | Polr2h    | 0.0000 | No |
| 41118 | Polr2i    | 0.0000 | No |
| 41119 | Polr2j    | 0.0000 | No |
| 41120 | Polr2k    | 0.0000 | No |
| 41121 | Polr2k-ps | 0.0000 | No |

|       |            |        |    |
|-------|------------|--------|----|
| 41122 | Polr2l     | 0.0000 | No |
| 41123 | Polr2m     | 0.0000 | No |
| 41124 | Polr3a     | 0.0000 | No |
| 41125 | Polr3b     | 0.0000 | No |
| 41126 | Polr3c     | 0.0000 | No |
| 41127 | Polr3d     | 0.0000 | No |
| 41128 | Polr3e     | 0.0000 | No |
| 41129 | Polr3f     | 0.0000 | No |
| 41130 | Polr3g     | 0.0000 | No |
| 41131 | Polr3gl    | 0.0000 | No |
| 41132 | Polr3h     | 0.0000 | No |
| 41133 | Polr3k     | 0.0000 | No |
| 41134 | Polrmt     | 0.0000 | No |
| 41135 | Pom121     | 0.0000 | No |
| 41136 | Pom121112  | 0.0000 | No |
| 41137 | Pom12112   | 0.0000 | No |
| 41138 | Pomc       | 0.0000 | No |
| 41139 | Pomgnt1    | 0.0000 | No |
| 41140 | Pomk       | 0.0000 | No |
| 41141 | Pomp       | 0.0000 | No |
| 41142 | Pomt1      | 0.0000 | No |
| 41143 | Pomt2      | 0.0000 | No |
| 41144 | Pon1       | 0.0000 | No |
| 41145 | Pon2       | 0.0000 | No |
| 41146 | Pop1       | 0.0000 | No |
| 41147 | Pop4       | 0.0000 | No |
| 41148 | Pop5       | 0.0000 | No |
| 41149 | Pop7       | 0.0000 | No |
| 41150 | Popdc2     | 0.0000 | No |
| 41151 | Popdc3     | 0.0000 | No |
| 41152 | Por        | 0.0000 | No |
| 41153 | Porcn      | 0.0000 | No |
| 41154 | Postn      | 0.0000 | No |
| 41155 | Pot1a      | 0.0000 | No |
| 41156 | Pot1b      | 0.0000 | No |
| 41157 | Poteg      | 0.0000 | No |
| 41158 | Pou1f1     | 0.0000 | No |
| 41159 | Pou2f1     | 0.0000 | No |
| 41160 | Pou2f2     | 0.0000 | No |
| 41161 | Pou2f3     | 0.0000 | No |
| 41162 | Pou2f3-rs1 | 0.0000 | No |
| 41163 | Pou3f1     | 0.0000 | No |
| 41164 | Pou3f2     | 0.0000 | No |
| 41165 | Pou3f3     | 0.0000 | No |
| 41166 | Pou3f4     | 0.0000 | No |
| 41167 | Pou4f1     | 0.0000 | No |

|       |          |        |    |
|-------|----------|--------|----|
| 41168 | Pou4f3   | 0.0000 | No |
| 41169 | Pou5f1   | 0.0000 | No |
| 41170 | Pou5f2   | 0.0000 | No |
| 41171 | Pou6f1   | 0.0000 | No |
| 41172 | Pou6f2   | 0.0000 | No |
| 41173 | Pp2d1    | 0.0000 | No |
| 41174 | Ppa1     | 0.0000 | No |
| 41175 | Ppa2     | 0.0000 | No |
| 41176 | Ppan     | 0.0000 | No |
| 41177 | Ppara    | 0.0000 | No |
| 41178 | Ppard    | 0.0000 | No |
| 41179 | Pparg    | 0.0000 | No |
| 41180 | Ppargc1b | 0.0000 | No |
| 41181 | Ppat     | 0.0000 | No |
| 41182 | Ppbp     | 0.0000 | No |
| 41183 | Ppcdc    | 0.0000 | No |
| 41184 | Ppcs     | 0.0000 | No |
| 41185 | Ppdpf    | 0.0000 | No |
| 41186 | Ppef1    | 0.0000 | No |
| 41187 | Ppef2    | 0.0000 | No |
| 41188 | Ppfia1   | 0.0000 | No |
| 41189 | Ppfia2   | 0.0000 | No |
| 41190 | Ppfia3   | 0.0000 | No |
| 41191 | Ppfia4   | 0.0000 | No |
| 41192 | Ppfibp1  | 0.0000 | No |
| 41193 | Ppfibp2  | 0.0000 | No |
| 41194 | Pphln1   | 0.0000 | No |
| 41195 | Ppia     | 0.0000 | No |
| 41196 | Ppib     | 0.0000 | No |
| 41197 | Ppic     | 0.0000 | No |
| 41198 | Ppid     | 0.0000 | No |
| 41199 | Ppie     | 0.0000 | No |
| 41200 | Ppif     | 0.0000 | No |
| 41201 | Ppig     | 0.0000 | No |
| 41202 | Ppih     | 0.0000 | No |
| 41203 | Ppil1    | 0.0000 | No |
| 41204 | Ppil2    | 0.0000 | No |
| 41205 | Ppil3    | 0.0000 | No |
| 41206 | Ppil4    | 0.0000 | No |
| 41207 | Ppil6    | 0.0000 | No |
| 41208 | Ppip5k1  | 0.0000 | No |
| 41209 | Ppip5k2  | 0.0000 | No |
| 41210 | Ppl      | 0.0000 | No |
| 41211 | Ppm1a    | 0.0000 | No |
| 41212 | Ppm1b    | 0.0000 | No |
| 41213 | Ppm1d    | 0.0000 | No |



|       |            |        |    |
|-------|------------|--------|----|
| 41214 | Ppm1e      | 0.0000 | No |
| 41215 | Ppm1f      | 0.0000 | No |
| 41216 | Ppm1g      | 0.0000 | No |
| 41217 | Ppm1j      | 0.0000 | No |
| 41218 | Ppm1k      | 0.0000 | No |
| 41219 | Ppm1l      | 0.0000 | No |
| 41220 | Ppm1m      | 0.0000 | No |
| 41221 | Ppm1n      | 0.0000 | No |
| 41222 | Ppme1      | 0.0000 | No |
| 41223 | Ppox       | 0.0000 | No |
| 41224 | Ppp1ca     | 0.0000 | No |
| 41225 | Ppp1cb     | 0.0000 | No |
| 41226 | Ppp1cc     | 0.0000 | No |
| 41227 | Ppp1r10    | 0.0000 | No |
| 41228 | Ppp1r11    | 0.0000 | No |
| 41229 | Ppp1r12a   | 0.0000 | No |
| 41230 | Ppp1r12b   | 0.0000 | No |
| 41231 | Ppp1r12c   | 0.0000 | No |
| 41232 | Ppp1r13b   | 0.0000 | No |
| 41233 | Ppp1r13l   | 0.0000 | No |
| 41234 | Ppp1r14a   | 0.0000 | No |
| 41235 | Ppp1r14b   | 0.0000 | No |
| 41236 | Ppp1r14c   | 0.0000 | No |
| 41237 | Ppp1r15a   | 0.0000 | No |
| 41238 | Ppp1r15b   | 0.0000 | No |
| 41239 | Ppp1r16a   | 0.0000 | No |
| 41240 | Ppp1r16b   | 0.0000 | No |
| 41241 | Ppp1r18    | 0.0000 | No |
| 41242 | Ppp1r18os  | 0.0000 | No |
| 41243 | Ppp1r1a    | 0.0000 | No |
| 41244 | Ppp1r1b    | 0.0000 | No |
| 41245 | Ppp1r1c    | 0.0000 | No |
| 41246 | Ppp1r2     | 0.0000 | No |
| 41247 | Ppp1r21    | 0.0000 | No |
| 41248 | Ppp1r26    | 0.0000 | No |
| 41249 | Ppp1r27    | 0.0000 | No |
| 41250 | Ppp1r2-ps2 | 0.0000 | No |
| 41251 | Ppp1r2-ps6 | 0.0000 | No |
| 41252 | Ppp1r2-ps7 | 0.0000 | No |
| 41253 | Ppp1r2-ps9 | 0.0000 | No |
| 41254 | Ppp1r32    | 0.0000 | No |
| 41255 | Ppp1r35    | 0.0000 | No |
| 41256 | Ppp1r36    | 0.0000 | No |
| 41257 | Ppp1r37    | 0.0000 | No |
| 41258 | Ppp1r3a    | 0.0000 | No |
| 41259 | Ppp1r3b    | 0.0000 | No |

|       |            |        |    |
|-------|------------|--------|----|
| 41260 | Ppp1r3c    | 0.0000 | No |
| 41261 | Ppp1r3e    | 0.0000 | No |
| 41262 | Ppp1r3f    | 0.0000 | No |
| 41263 | Ppp1r3fos  | 0.0000 | No |
| 41264 | Ppp1r3g    | 0.0000 | No |
| 41265 | Ppp1r42    | 0.0000 | No |
| 41266 | Ppp1r7     | 0.0000 | No |
| 41267 | Ppp1r8     | 0.0000 | No |
| 41268 | Ppp1r9a    | 0.0000 | No |
| 41269 | Ppp1r9b    | 0.0000 | No |
| 41270 | Ppp2ca     | 0.0000 | No |
| 41271 | Ppp2cb     | 0.0000 | No |
| 41272 | Ppp2r1a    | 0.0000 | No |
| 41273 | Ppp2r1b    | 0.0000 | No |
| 41274 | Ppp2r2a    | 0.0000 | No |
| 41275 | Ppp2r2b    | 0.0000 | No |
| 41276 | Ppp2r2c    | 0.0000 | No |
| 41277 | Ppp2r2d    | 0.0000 | No |
| 41278 | Ppp2r3a    | 0.0000 | No |
| 41279 | Ppp2r3c    | 0.0000 | No |
| 41280 | Ppp2r3d    | 0.0000 | No |
| 41281 | Ppp2r5a    | 0.0000 | No |
| 41282 | Ppp2r5b    | 0.0000 | No |
| 41283 | Ppp2r5c    | 0.0000 | No |
| 41284 | Ppp2r5d    | 0.0000 | No |
| 41285 | Ppp2r5e    | 0.0000 | No |
| 41286 | Ppp3cb     | 0.0000 | No |
| 41287 | Ppp3cc     | 0.0000 | No |
| 41288 | Ppp3r1     | 0.0000 | No |
| 41289 | Ppp3r2     | 0.0000 | No |
| 41290 | Ppp4c      | 0.0000 | No |
| 41291 | Ppp4r1     | 0.0000 | No |
| 41292 | Ppp4r1l-ps | 0.0000 | No |
| 41293 | Ppp4r2     | 0.0000 | No |
| 41294 | Ppp4r4     | 0.0000 | No |
| 41295 | Ppp5c      | 0.0000 | No |
| 41296 | Ppp6c      | 0.0000 | No |
| 41297 | Ppp6r1     | 0.0000 | No |
| 41298 | Ppp6r2     | 0.0000 | No |
| 41299 | Ppp6r3     | 0.0000 | No |
| 41300 | Ppre1      | 0.0000 | No |
| 41301 | Ppt1       | 0.0000 | No |
| 41302 | Ppt2       | 0.0000 | No |
| 41303 | Pptc7      | 0.0000 | No |
| 41304 | Ppwd1      | 0.0000 | No |
| 41305 | Ppy        | 0.0000 | No |

|       |           |        |    |
|-------|-----------|--------|----|
| 41306 | Pqlc1     | 0.0000 | No |
| 41307 | Pqlc2     | 0.0000 | No |
| 41308 | Pqlc3     | 0.0000 | No |
| 41309 | Pradc1    | 0.0000 | No |
| 41310 | Praf2     | 0.0000 | No |
| 41311 | Pram1     | 0.0000 | No |
| 41312 | Pramef25  | 0.0000 | No |
| 41313 | Pramef6   | 0.0000 | No |
| 41314 | Pramef8   | 0.0000 | No |
| 41315 | Pramel    | 0.0000 | No |
| 41316 | Pramel1   | 0.0000 | No |
| 41317 | Pramel3   | 0.0000 | No |
| 41318 | Pramel4   | 0.0000 | No |
| 41319 | Pramel5   | 0.0000 | No |
| 41320 | Pramel6   | 0.0000 | No |
| 41321 | Pramel7   | 0.0000 | No |
| 41322 | Prb1      | 0.0000 | No |
| 41323 | Prb3-ps   | 0.0000 | No |
| 41324 | Prc1      | 0.0000 | No |
| 41325 | Prcc      | 0.0000 | No |
| 41326 | Prdm1     | 0.0000 | No |
| 41327 | Prdm10    | 0.0000 | No |
| 41328 | Prdm12    | 0.0000 | No |
| 41329 | Prdm13    | 0.0000 | No |
| 41330 | Prdm14    | 0.0000 | No |
| 41331 | Prdm15    | 0.0000 | No |
| 41332 | Prdm16    | 0.0000 | No |
| 41333 | Prdm2     | 0.0000 | No |
| 41334 | Prdm4     | 0.0000 | No |
| 41335 | Prdm5     | 0.0000 | No |
| 41336 | Prdm6     | 0.0000 | No |
| 41337 | Prdm8     | 0.0000 | No |
| 41338 | Prdm9     | 0.0000 | No |
| 41339 | Prdx1     | 0.0000 | No |
| 41340 | Prdx2     | 0.0000 | No |
| 41341 | Prdx3     | 0.0000 | No |
| 41342 | Prdx4     | 0.0000 | No |
| 41343 | Prdx5     | 0.0000 | No |
| 41344 | Prdx6     | 0.0000 | No |
| 41345 | Prdx6b    | 0.0000 | No |
| 41346 | Prdx6-ps2 | 0.0000 | No |
| 41347 | Preb      | 0.0000 | No |
| 41348 | Prelid1   | 0.0000 | No |
| 41349 | Prelid2   | 0.0000 | No |
| 41350 | Prelp     | 0.0000 | No |
| 41351 | Prep      | 0.0000 | No |

|       |            |        |    |
|-------|------------|--------|----|
| 41352 | Prepl      | 0.0000 | No |
| 41353 | Prex1      | 0.0000 | No |
| 41354 | Prex2      | 0.0000 | No |
| 41355 | Prf1       | 0.0000 | No |
| 41356 | Prg2       | 0.0000 | No |
| 41357 | Prg4       | 0.0000 | No |
| 41358 | Prh1       | 0.0000 | No |
| 41359 | Prickle1   | 0.0000 | No |
| 41360 | Prickle2   | 0.0000 | No |
| 41361 | Prickle3   | 0.0000 | No |
| 41362 | Prickle4   | 0.0000 | No |
| 41363 | Prim1      | 0.0000 | No |
| 41364 | Prim2      | 0.0000 | No |
| 41365 | Primpol    | 0.0000 | No |
| 41366 | Prkaa1     | 0.0000 | No |
| 41367 | Prkaa2     | 0.0000 | No |
| 41368 | Prkab2     | 0.0000 | No |
| 41369 | Prkaca     | 0.0000 | No |
| 41370 | Prkaca-ps1 | 0.0000 | No |
| 41371 | Prkag1     | 0.0000 | No |
| 41372 | Prkag2     | 0.0000 | No |
| 41373 | Prkag2os1  | 0.0000 | No |
| 41374 | Prkag2os2  | 0.0000 | No |
| 41375 | Prkag3     | 0.0000 | No |
| 41376 | Prkar1b    | 0.0000 | No |
| 41377 | Prkar2a    | 0.0000 | No |
| 41378 | Prkar2b    | 0.0000 | No |
| 41379 | Prkca      | 0.0000 | No |
| 41380 | Prkcb      | 0.0000 | No |
| 41381 | Prkcdbp    | 0.0000 | No |
| 41382 | Prkce      | 0.0000 | No |
| 41383 | Prkcg      | 0.0000 | No |
| 41384 | Prkci      | 0.0000 | No |
| 41385 | Prkesh     | 0.0000 | No |
| 41386 | Prkez      | 0.0000 | No |
| 41387 | Prkcz2     | 0.0000 | No |
| 41388 | Prkd1      | 0.0000 | No |
| 41389 | Prkd2      | 0.0000 | No |
| 41390 | Prkdc      | 0.0000 | No |
| 41391 | Prkg1      | 0.0000 | No |
| 41392 | Prkg2      | 0.0000 | No |
| 41393 | Prkra      | 0.0000 | No |
| 41394 | Prkrip1    | 0.0000 | No |
| 41395 | Prkrir     | 0.0000 | No |
| 41396 | Prl        | 0.0000 | No |
| 41397 | Prl2a1     | 0.0000 | No |

|       |        |        |    |
|-------|--------|--------|----|
| 41398 | Prl2b1 | 0.0000 | No |
| 41399 | Prl2c1 | 0.0000 | No |
| 41400 | Prl2c2 | 0.0000 | No |
| 41401 | Prl2c3 | 0.0000 | No |
| 41402 | Prl2c5 | 0.0000 | No |
| 41403 | Prl3a1 | 0.0000 | No |
| 41404 | Prl3b1 | 0.0000 | No |
| 41405 | Prl3c1 | 0.0000 | No |
| 41406 | Prl3d1 | 0.0000 | No |
| 41407 | Prl3d2 | 0.0000 | No |
| 41408 | Prl4a1 | 0.0000 | No |
| 41409 | Prl5a1 | 0.0000 | No |
| 41410 | Prl6a1 | 0.0000 | No |
| 41411 | Prl7a2 | 0.0000 | No |
| 41412 | Prl7c1 | 0.0000 | No |
| 41413 | Prl7d1 | 0.0000 | No |
| 41414 | Prl8a1 | 0.0000 | No |
| 41415 | Prl8a2 | 0.0000 | No |
| 41416 | Prl8a6 | 0.0000 | No |
| 41417 | Prl8a8 | 0.0000 | No |
| 41418 | Prl8a9 | 0.0000 | No |
| 41419 | Prlh   | 0.0000 | No |
| 41420 | Prlhr  | 0.0000 | No |
| 41421 | Prlr   | 0.0000 | No |
| 41422 | Prlm1  | 0.0000 | No |
| 41423 | Prlm2  | 0.0000 | No |
| 41424 | Prlm3  | 0.0000 | No |
| 41425 | Prlmt1 | 0.0000 | No |
| 41426 | Prlmt2 | 0.0000 | No |
| 41427 | Prlmt3 | 0.0000 | No |
| 41428 | Prlmt5 | 0.0000 | No |
| 41429 | Prlmt6 | 0.0000 | No |
| 41430 | Prlmt7 | 0.0000 | No |
| 41431 | Prlmt8 | 0.0000 | No |
| 41432 | Prlmt9 | 0.0000 | No |
| 41433 | Prlnp  | 0.0000 | No |
| 41434 | Prbl1  | 0.0000 | No |
| 41435 | Proca1 | 0.0000 | No |
| 41436 | Procr  | 0.0000 | No |
| 41437 | Prodh  | 0.0000 | No |
| 41438 | Prodh2 | 0.0000 | No |
| 41439 | Prok1  | 0.0000 | No |
| 41440 | Prokr1 | 0.0000 | No |
| 41441 | Prokr2 | 0.0000 | No |
| 41442 | Prol1  | 0.0000 | No |
| 41443 | Prom1  | 0.0000 | No |

|       |         |        |    |
|-------|---------|--------|----|
| 41444 | Prop1   | 0.0000 | No |
| 41445 | Prorsd1 | 0.0000 | No |
| 41446 | Pros1   | 0.0000 | No |
| 41447 | Prosc   | 0.0000 | No |
| 41448 | Proscos | 0.0000 | No |
| 41449 | Proser1 | 0.0000 | No |
| 41450 | Proser2 | 0.0000 | No |
| 41451 | Proser3 | 0.0000 | No |
| 41452 | Prox1   | 0.0000 | No |
| 41453 | Prox1os | 0.0000 | No |
| 41454 | Prox2   | 0.0000 | No |
| 41455 | Prox2os | 0.0000 | No |
| 41456 | Proz    | 0.0000 | No |
| 41457 | Prp2    | 0.0000 | No |
| 41458 | Prpf18  | 0.0000 | No |
| 41459 | Prpf19  | 0.0000 | No |
| 41460 | Prpf3   | 0.0000 | No |
| 41461 | Prpf31  | 0.0000 | No |
| 41462 | Prpf38a | 0.0000 | No |
| 41463 | Prpf38b | 0.0000 | No |
| 41464 | Prpf39  | 0.0000 | No |
| 41465 | Prpf4   | 0.0000 | No |
| 41466 | Prpf40a | 0.0000 | No |
| 41467 | Prpf40b | 0.0000 | No |
| 41468 | Prpf4b  | 0.0000 | No |
| 41469 | Prpf6   | 0.0000 | No |
| 41470 | Prpf8   | 0.0000 | No |
| 41471 | Prph    | 0.0000 | No |
| 41472 | Prph2   | 0.0000 | No |
| 41473 | Prpmp5  | 0.0000 | No |
| 41474 | Prps111 | 0.0000 | No |
| 41475 | Prps113 | 0.0000 | No |
| 41476 | Prps2   | 0.0000 | No |
| 41477 | Prpsap1 | 0.0000 | No |
| 41478 | Prpsap2 | 0.0000 | No |
| 41479 | Prr11   | 0.0000 | No |
| 41480 | Prr12   | 0.0000 | No |
| 41481 | Prr13   | 0.0000 | No |
| 41482 | Prr14   | 0.0000 | No |
| 41483 | Prr14l  | 0.0000 | No |
| 41484 | Prr15   | 0.0000 | No |
| 41485 | Prr15l  | 0.0000 | No |
| 41486 | Prr16   | 0.0000 | No |
| 41487 | Prr18   | 0.0000 | No |
| 41488 | Prr19   | 0.0000 | No |
| 41489 | Prr23a2 | 0.0000 | No |

|       |          |        |    |
|-------|----------|--------|----|
| 41490 | Prr27    | 0.0000 | No |
| 41491 | Prr29    | 0.0000 | No |
| 41492 | Prr3     | 0.0000 | No |
| 41493 | Prr30    | 0.0000 | No |
| 41494 | Prr33    | 0.0000 | No |
| 41495 | Prr7     | 0.0000 | No |
| 41496 | Prr9     | 0.0000 | No |
| 41497 | Prrc1    | 0.0000 | No |
| 41498 | Prrc2a   | 0.0000 | No |
| 41499 | Prrc2b   | 0.0000 | No |
| 41500 | Prrc2c   | 0.0000 | No |
| 41501 | Prrg1    | 0.0000 | No |
| 41502 | Prrg2    | 0.0000 | No |
| 41503 | Prrg3    | 0.0000 | No |
| 41504 | Prrg4    | 0.0000 | No |
| 41505 | Prrt2    | 0.0000 | No |
| 41506 | Prrt3    | 0.0000 | No |
| 41507 | Prrt4    | 0.0000 | No |
| 41508 | Prrx2    | 0.0000 | No |
| 41509 | Prrxl1   | 0.0000 | No |
| 41510 | Prss1    | 0.0000 | No |
| 41511 | Prss12   | 0.0000 | No |
| 41512 | Prss16   | 0.0000 | No |
| 41513 | Prss2    | 0.0000 | No |
| 41514 | Prss21   | 0.0000 | No |
| 41515 | Prss22   | 0.0000 | No |
| 41516 | Prss23os | 0.0000 | No |
| 41517 | Prss27   | 0.0000 | No |
| 41518 | Prss29   | 0.0000 | No |
| 41519 | Prss3    | 0.0000 | No |
| 41520 | Prss30   | 0.0000 | No |
| 41521 | Prss33   | 0.0000 | No |
| 41522 | Prss34   | 0.0000 | No |
| 41523 | Prss35   | 0.0000 | No |
| 41524 | Prss36   | 0.0000 | No |
| 41525 | Prss37   | 0.0000 | No |
| 41526 | Prss40   | 0.0000 | No |
| 41527 | Prss41   | 0.0000 | No |
| 41528 | Prss42   | 0.0000 | No |
| 41529 | Prss43   | 0.0000 | No |
| 41530 | Prss44   | 0.0000 | No |
| 41531 | Prss46   | 0.0000 | No |
| 41532 | Prss47   | 0.0000 | No |
| 41533 | Prss48   | 0.0000 | No |
| 41534 | Prss50   | 0.0000 | No |
| 41535 | Prss51   | 0.0000 | No |

|       |         |        |    |
|-------|---------|--------|----|
| 41536 | Prss52  | 0.0000 | No |
| 41537 | Prss53  | 0.0000 | No |
| 41538 | Prss54  | 0.0000 | No |
| 41539 | Prss55  | 0.0000 | No |
| 41540 | Prss56  | 0.0000 | No |
| 41541 | Prss57  | 0.0000 | No |
| 41542 | Prss58  | 0.0000 | No |
| 41543 | Prss8   | 0.0000 | No |
| 41544 | Prtg    | 0.0000 | No |
| 41545 | Prtn3   | 0.0000 | No |
| 41546 | Prune1  | 0.0000 | No |
| 41547 | Prune2  | 0.0000 | No |
| 41548 | Prx     | 0.0000 | No |
| 41549 | Psap    | 0.0000 | No |
| 41550 | Psapl1  | 0.0000 | No |
| 41551 | Psat1   | 0.0000 | No |
| 41552 | Psca    | 0.0000 | No |
| 41553 | Psd     | 0.0000 | No |
| 41554 | Psd2    | 0.0000 | No |
| 41555 | Psd3    | 0.0000 | No |
| 41556 | Psd4    | 0.0000 | No |
| 41557 | Psen1   | 0.0000 | No |
| 41558 | Psen2   | 0.0000 | No |
| 41559 | Psenen  | 0.0000 | No |
| 41560 | Psg16   | 0.0000 | No |
| 41561 | Psg17   | 0.0000 | No |
| 41562 | Psg18   | 0.0000 | No |
| 41563 | Psg19   | 0.0000 | No |
| 41564 | Psg20   | 0.0000 | No |
| 41565 | Psg21   | 0.0000 | No |
| 41566 | Psg22   | 0.0000 | No |
| 41567 | Psg23   | 0.0000 | No |
| 41568 | Psg26   | 0.0000 | No |
| 41569 | Psg27   | 0.0000 | No |
| 41570 | Psg28   | 0.0000 | No |
| 41571 | Psg29   | 0.0000 | No |
| 41572 | Psg-ps1 | 0.0000 | No |
| 41573 | Psip1   | 0.0000 | No |
| 41574 | Pskh1   | 0.0000 | No |
| 41575 | Psma1   | 0.0000 | No |
| 41576 | Psma2   | 0.0000 | No |
| 41577 | Psma3   | 0.0000 | No |
| 41578 | Psma4   | 0.0000 | No |
| 41579 | Psma5   | 0.0000 | No |
| 41580 | Psma7   | 0.0000 | No |
| 41581 | Psma8   | 0.0000 | No |



|       |            |        |    |
|-------|------------|--------|----|
| 41582 | Psmbl1     | 0.0000 | No |
| 41583 | Psmbl10    | 0.0000 | No |
| 41584 | Psmbl11    | 0.0000 | No |
| 41585 | Psmbl2     | 0.0000 | No |
| 41586 | Psmbl3     | 0.0000 | No |
| 41587 | Psmbl4     | 0.0000 | No |
| 41588 | Psmbl5     | 0.0000 | No |
| 41589 | Psmbl6     | 0.0000 | No |
| 41590 | Psmbl6-ps  | 0.0000 | No |
| 41591 | Psmbl6-ps2 | 0.0000 | No |
| 41592 | Psmbl7     | 0.0000 | No |
| 41593 | Psmbl7-ps2 | 0.0000 | No |
| 41594 | Psmbl8     | 0.0000 | No |
| 41595 | Psmbl9     | 0.0000 | No |
| 41596 | Psmc1      | 0.0000 | No |
| 41597 | Psmc2      | 0.0000 | No |
| 41598 | Psmc3      | 0.0000 | No |
| 41599 | Psmc3ip    | 0.0000 | No |
| 41600 | Psmc4      | 0.0000 | No |
| 41601 | Psmc6      | 0.0000 | No |
| 41602 | Psmc1      | 0.0000 | No |
| 41603 | Psmc10     | 0.0000 | No |
| 41604 | Psmc11     | 0.0000 | No |
| 41605 | Psmc12     | 0.0000 | No |
| 41606 | Psmc13     | 0.0000 | No |
| 41607 | Psmc14     | 0.0000 | No |
| 41608 | Psmc2      | 0.0000 | No |
| 41609 | Psmc3      | 0.0000 | No |
| 41610 | Psmc4      | 0.0000 | No |
| 41611 | Psmc5      | 0.0000 | No |
| 41612 | Psmc6      | 0.0000 | No |
| 41613 | Psmc7      | 0.0000 | No |
| 41614 | Psmc8      | 0.0000 | No |
| 41615 | Psmc9      | 0.0000 | No |
| 41616 | Psmc1      | 0.0000 | No |
| 41617 | Psmc2      | 0.0000 | No |
| 41618 | Psmc2b     | 0.0000 | No |
| 41619 | Psmc3      | 0.0000 | No |
| 41620 | Psmc4      | 0.0000 | No |
| 41621 | Psmf1      | 0.0000 | No |
| 41622 | Psmg1      | 0.0000 | No |
| 41623 | Psmg2      | 0.0000 | No |
| 41624 | Psmg3      | 0.0000 | No |
| 41625 | Pspc1      | 0.0000 | No |
| 41626 | Psph       | 0.0000 | No |
| 41627 | Pspn       | 0.0000 | No |

|       |          |        |    |
|-------|----------|--------|----|
| 41628 | Psrc1    | 0.0000 | No |
| 41629 | Pstk     | 0.0000 | No |
| 41630 | Pstpip1  | 0.0000 | No |
| 41631 | Pstpip2  | 0.0000 | No |
| 41632 | Ptafr    | 0.0000 | No |
| 41633 | Ptar1    | 0.0000 | No |
| 41634 | Ptbp1    | 0.0000 | No |
| 41635 | Ptbp2    | 0.0000 | No |
| 41636 | Ptbp3    | 0.0000 | No |
| 41637 | Ptcd1    | 0.0000 | No |
| 41638 | Ptcd2    | 0.0000 | No |
| 41639 | Ptcd3    | 0.0000 | No |
| 41640 | Ptch1    | 0.0000 | No |
| 41641 | Ptch2    | 0.0000 | No |
| 41642 | Ptchd1   | 0.0000 | No |
| 41643 | Ptchd2   | 0.0000 | No |
| 41644 | Ptchd3   | 0.0000 | No |
| 41645 | Ptchd4   | 0.0000 | No |
| 41646 | Ptcra    | 0.0000 | No |
| 41647 | Ptdss1   | 0.0000 | No |
| 41648 | Ptdss2   | 0.0000 | No |
| 41649 | Pten     | 0.0000 | No |
| 41650 | Pter     | 0.0000 | No |
| 41651 | Ptfla    | 0.0000 | No |
| 41652 | Ptflaos  | 0.0000 | No |
| 41653 | Ptgdr    | 0.0000 | No |
| 41654 | Ptgdr2   | 0.0000 | No |
| 41655 | Ptgds    | 0.0000 | No |
| 41656 | Ptger1   | 0.0000 | No |
| 41657 | Ptger2   | 0.0000 | No |
| 41658 | Ptger3   | 0.0000 | No |
| 41659 | Ptger4   | 0.0000 | No |
| 41660 | Ptges    | 0.0000 | No |
| 41661 | Ptges2   | 0.0000 | No |
| 41662 | Ptges3   | 0.0000 | No |
| 41663 | Ptges3l  | 0.0000 | No |
| 41664 | Ptgfr    | 0.0000 | No |
| 41665 | Ptgfrn   | 0.0000 | No |
| 41666 | Ptgir    | 0.0000 | No |
| 41667 | Ptgr1    | 0.0000 | No |
| 41668 | Ptgr2    | 0.0000 | No |
| 41669 | Ptgs2    | 0.0000 | No |
| 41670 | Ptgs2os  | 0.0000 | No |
| 41671 | Ptgs2os2 | 0.0000 | No |
| 41672 | Pth      | 0.0000 | No |
| 41673 | Pth1r    | 0.0000 | No |

|       |          |        |    |
|-------|----------|--------|----|
| 41674 | Pth2     | 0.0000 | No |
| 41675 | Pth2r    | 0.0000 | No |
| 41676 | Pthlh    | 0.0000 | No |
| 41677 | Ptk2     | 0.0000 | No |
| 41678 | Ptk2b    | 0.0000 | No |
| 41679 | Ptk6     | 0.0000 | No |
| 41680 | Ptk7     | 0.0000 | No |
| 41681 | Ptma     | 0.0000 | No |
| 41682 | Ptma-ps1 | 0.0000 | No |
| 41683 | Ptms     | 0.0000 | No |
| 41684 | Ptn      | 0.0000 | No |
| 41685 | Ptov1    | 0.0000 | No |
| 41686 | Ptp4a1   | 0.0000 | No |
| 41687 | Ptp4a2   | 0.0000 | No |
| 41688 | Ptp4a3   | 0.0000 | No |
| 41689 | Ptpa     | 0.0000 | No |
| 41690 | Ptpdc1   | 0.0000 | No |
| 41691 | Ptpmt1   | 0.0000 | No |
| 41692 | Ptpn1    | 0.0000 | No |
| 41693 | Ptpn11   | 0.0000 | No |
| 41694 | Ptpn12   | 0.0000 | No |
| 41695 | Ptpn13   | 0.0000 | No |
| 41696 | Ptpn14   | 0.0000 | No |
| 41697 | Ptpn18   | 0.0000 | No |
| 41698 | Ptpn2    | 0.0000 | No |
| 41699 | Ptpn20   | 0.0000 | No |
| 41700 | Ptpn21   | 0.0000 | No |
| 41701 | Ptpn22   | 0.0000 | No |
| 41702 | Ptpn23   | 0.0000 | No |
| 41703 | Ptpn3    | 0.0000 | No |
| 41704 | Ptpn4    | 0.0000 | No |
| 41705 | Ptpn5    | 0.0000 | No |
| 41706 | Ptpn6    | 0.0000 | No |
| 41707 | Ptpn7    | 0.0000 | No |
| 41708 | Ptpra    | 0.0000 | No |
| 41709 | Ptprb    | 0.0000 | No |
| 41710 | Ptprc    | 0.0000 | No |
| 41711 | Ptprcap  | 0.0000 | No |
| 41712 | Ptprd    | 0.0000 | No |
| 41713 | Ptpre    | 0.0000 | No |
| 41714 | Ptprf    | 0.0000 | No |
| 41715 | Ptprg    | 0.0000 | No |
| 41716 | Ptprh    | 0.0000 | No |
| 41717 | Ptprj    | 0.0000 | No |
| 41718 | Ptprk    | 0.0000 | No |
| 41719 | Ptprm    | 0.0000 | No |

|       |        |        |    |
|-------|--------|--------|----|
| 41720 | Ptprn  | 0.0000 | No |
| 41721 | Ptprn2 | 0.0000 | No |
| 41722 | Ptpro  | 0.0000 | No |
| 41723 | Ptprq  | 0.0000 | No |
| 41724 | Ptprs  | 0.0000 | No |
| 41725 | Ptprt  | 0.0000 | No |
| 41726 | Ptpru  | 0.0000 | No |
| 41727 | Ptprv  | 0.0000 | No |
| 41728 | Ptprz1 | 0.0000 | No |
| 41729 | Ptrf   | 0.0000 | No |
| 41730 | Ptrh1  | 0.0000 | No |
| 41731 | Ptrh2  | 0.0000 | No |
| 41732 | Ptrhd1 | 0.0000 | No |
| 41733 | Pts    | 0.0000 | No |
| 41734 | Pttg1  | 0.0000 | No |
| 41735 | Ptx4   | 0.0000 | No |
| 41736 | Puf60  | 0.0000 | No |
| 41737 | Pum1   | 0.0000 | No |
| 41738 | Pum2   | 0.0000 | No |
| 41739 | Pum3   | 0.0000 | No |
| 41740 | Pura   | 0.0000 | No |
| 41741 | Purb   | 0.0000 | No |
| 41742 | Purg   | 0.0000 | No |
| 41743 | Pus1   | 0.0000 | No |
| 41744 | Pus10  | 0.0000 | No |
| 41745 | Pus3   | 0.0000 | No |
| 41746 | Pus7   | 0.0000 | No |
| 41747 | Pus7l  | 0.0000 | No |
| 41748 | Pusl1  | 0.0000 | No |
| 41749 | Pvr    | 0.0000 | No |
| 41750 | Pvt1   | 0.0000 | No |
| 41751 | Pwp1   | 0.0000 | No |
| 41752 | Pwp2   | 0.0000 | No |
| 41753 | Pwwp2a | 0.0000 | No |
| 41754 | Pwwp2b | 0.0000 | No |
| 41755 | Pxdc1  | 0.0000 | No |
| 41756 | Pxdn   | 0.0000 | No |
| 41757 | Pxk    | 0.0000 | No |
| 41758 | Pxmp2  | 0.0000 | No |
| 41759 | Pxmp4  | 0.0000 | No |
| 41760 | Pxn    | 0.0000 | No |
| 41761 | Pxt1   | 0.0000 | No |
| 41762 | Pxylp1 | 0.0000 | No |
| 41763 | Pycard | 0.0000 | No |
| 41764 | Pycr1  | 0.0000 | No |
| 41765 | Pycr1  | 0.0000 | No |

|       |              |        |    |
|-------|--------------|--------|----|
| 41766 | Pygb         | 0.0000 | No |
| 41767 | Pygl         | 0.0000 | No |
| 41768 | Pygm         | 0.0000 | No |
| 41769 | Pygo1        | 0.0000 | No |
| 41770 | Pygo2        | 0.0000 | No |
| 41771 | Pym1         | 0.0000 | No |
| 41772 | Pyroxd1      | 0.0000 | No |
| 41773 | Pyroxd2      | 0.0000 | No |
| 41774 | Pyurf        | 0.0000 | No |
| 41775 | Pyy          | 0.0000 | No |
| 41776 | Pzp          | 0.0000 | No |
| 41777 | Qars         | 0.0000 | No |
| 41778 | Qdpr         | 0.0000 | No |
| 41779 | Qk           | 0.0000 | No |
| 41780 | Qpctl        | 0.0000 | No |
| 41781 | Qprt         | 0.0000 | No |
| 41782 | Qrfp         | 0.0000 | No |
| 41783 | Qrfpr        | 0.0000 | No |
| 41784 | Qrich1       | 0.0000 | No |
| 41785 | Qrich2       | 0.0000 | No |
| 41786 | Qrsl1        | 0.0000 | No |
| 41787 | Qser1        | 0.0000 | No |
| 41788 | Qsox1        | 0.0000 | No |
| 41789 | Qsox2        | 0.0000 | No |
| 41790 | Qrt1         | 0.0000 | No |
| 41791 | Qtrtd1       | 0.0000 | No |
| 41792 | R3hcc1       | 0.0000 | No |
| 41793 | R3hcc11      | 0.0000 | No |
| 41794 | R3hdm1       | 0.0000 | No |
| 41795 | R3hdm2       | 0.0000 | No |
| 41796 | R3hdm4       | 0.0000 | No |
| 41797 | R74862       | 0.0000 | No |
| 41798 | Rab10        | 0.0000 | No |
| 41799 | Rab10os      | 0.0000 | No |
| 41800 | Rab11a       | 0.0000 | No |
| 41801 | Rab11b-ps2   | 0.0000 | No |
| 41802 | Rab11fip1    | 0.0000 | No |
| 41803 | Rab11fip2    | 0.0000 | No |
| 41804 | Rab11fip3    | 0.0000 | No |
| 41805 | Rab11fip4    | 0.0000 | No |
| 41806 | Rab11fip4os1 | 0.0000 | No |
| 41807 | Rab11fip5    | 0.0000 | No |
| 41808 | Rab12        | 0.0000 | No |
| 41809 | Rab13        | 0.0000 | No |
| 41810 | Rab14        | 0.0000 | No |
| 41811 | Rab15        | 0.0000 | No |

|       |          |        |    |
|-------|----------|--------|----|
| 41812 | Rab17    | 0.0000 | No |
| 41813 | Rab18    | 0.0000 | No |
| 41814 | Rab19    | 0.0000 | No |
| 41815 | Rab1a    | 0.0000 | No |
| 41816 | Rab1b    | 0.0000 | No |
| 41817 | Rab20    | 0.0000 | No |
| 41818 | Rab21    | 0.0000 | No |
| 41819 | Rab22a   | 0.0000 | No |
| 41820 | Rab23    | 0.0000 | No |
| 41821 | Rab24    | 0.0000 | No |
| 41822 | Rab25    | 0.0000 | No |
| 41823 | Rab26    | 0.0000 | No |
| 41824 | Rab26os  | 0.0000 | No |
| 41825 | Rab27a   | 0.0000 | No |
| 41826 | Rab28    | 0.0000 | No |
| 41827 | Rab29    | 0.0000 | No |
| 41828 | Rab2a    | 0.0000 | No |
| 41829 | Rab2b    | 0.0000 | No |
| 41830 | Rab30    | 0.0000 | No |
| 41831 | Rab31    | 0.0000 | No |
| 41832 | Rab32    | 0.0000 | No |
| 41833 | Rab33b   | 0.0000 | No |
| 41834 | Rab35    | 0.0000 | No |
| 41835 | Rab36    | 0.0000 | No |
| 41836 | Rab37    | 0.0000 | No |
| 41837 | Rab38    | 0.0000 | No |
| 41838 | Rab39    | 0.0000 | No |
| 41839 | Rab39b   | 0.0000 | No |
| 41840 | Rab3a    | 0.0000 | No |
| 41841 | Rab3b    | 0.0000 | No |
| 41842 | Rab3c    | 0.0000 | No |
| 41843 | Rab3d    | 0.0000 | No |
| 41844 | Rab3gap1 | 0.0000 | No |
| 41845 | Rab3gap2 | 0.0000 | No |
| 41846 | Rab3il1  | 0.0000 | No |
| 41847 | Rab3ip   | 0.0000 | No |
| 41848 | Rab40b   | 0.0000 | No |
| 41849 | Rab40c   | 0.0000 | No |
| 41850 | Rab42    | 0.0000 | No |
| 41851 | Rab43    | 0.0000 | No |
| 41852 | Rab44    | 0.0000 | No |
| 41853 | Rab4a    | 0.0000 | No |
| 41854 | Rab4b    | 0.0000 | No |
| 41855 | Rab5a    | 0.0000 | No |
| 41856 | Rab5b    | 0.0000 | No |
| 41857 | Rab5c    | 0.0000 | No |

|       |           |        |    |
|-------|-----------|--------|----|
| 41858 | Rab6a     | 0.0000 | No |
| 41859 | Rab6b     | 0.0000 | No |
| 41860 | Rab7      | 0.0000 | No |
| 41861 | Rab8a     | 0.0000 | No |
| 41862 | Rab9      | 0.0000 | No |
| 41863 | Rab9b-ps1 | 0.0000 | No |
| 41864 | Rabac1    | 0.0000 | No |
| 41865 | Rabep2    | 0.0000 | No |
| 41866 | Rabepk    | 0.0000 | No |
| 41867 | Rabgap1   | 0.0000 | No |
| 41868 | Rabgap1l  | 0.0000 | No |
| 41869 | Rabgef1   | 0.0000 | No |
| 41870 | Rabggta   | 0.0000 | No |
| 41871 | Rabggtb   | 0.0000 | No |
| 41872 | Rabif     | 0.0000 | No |
| 41873 | Rabl2     | 0.0000 | No |
| 41874 | Rabl3     | 0.0000 | No |
| 41875 | Rabl6     | 0.0000 | No |
| 41876 | Rac1      | 0.0000 | No |
| 41877 | Rac2      | 0.0000 | No |
| 41878 | Rac3      | 0.0000 | No |
| 41879 | Racgap1   | 0.0000 | No |
| 41880 | Rack1     | 0.0000 | No |
| 41881 | Rad1      | 0.0000 | No |
| 41882 | Rad17     | 0.0000 | No |
| 41883 | Rad18     | 0.0000 | No |
| 41884 | Rad21     | 0.0000 | No |
| 41885 | Rad23a    | 0.0000 | No |
| 41886 | Rad23b    | 0.0000 | No |
| 41887 | Rad50     | 0.0000 | No |
| 41888 | Rad51     | 0.0000 | No |
| 41889 | Rad51ap1  | 0.0000 | No |
| 41890 | Rad51b    | 0.0000 | No |
| 41891 | Rad51c    | 0.0000 | No |
| 41892 | Rad51d    | 0.0000 | No |
| 41893 | Rad52     | 0.0000 | No |
| 41894 | Rad54b    | 0.0000 | No |
| 41895 | Rad54l    | 0.0000 | No |
| 41896 | Rad9a     | 0.0000 | No |
| 41897 | Rad9b     | 0.0000 | No |
| 41898 | Rae1      | 0.0000 | No |
| 41899 | Raet1d    | 0.0000 | No |
| 41900 | Raet1e    | 0.0000 | No |
| 41901 | Raf1      | 0.0000 | No |
| 41902 | Rag1      | 0.0000 | No |
| 41903 | Rai1      | 0.0000 | No |

|       |             |        |    |
|-------|-------------|--------|----|
| 41904 | Rai14       | 0.0000 | No |
| 41905 | Rai2        | 0.0000 | No |
| 41906 | Rala        | 0.0000 | No |
| 41907 | Ralb        | 0.0000 | No |
| 41908 | Ralbp1      | 0.0000 | No |
| 41909 | Ralgapa1    | 0.0000 | No |
| 41910 | Ralgapa2    | 0.0000 | No |
| 41911 | Ralgapb     | 0.0000 | No |
| 41912 | Ralgds      | 0.0000 | No |
| 41913 | Ralgps1     | 0.0000 | No |
| 41914 | Ralgps2     | 0.0000 | No |
| 41915 | Raly        | 0.0000 | No |
| 41916 | Raly1       | 0.0000 | No |
| 41917 | Ramp1       | 0.0000 | No |
| 41918 | Ramp2       | 0.0000 | No |
| 41919 | Ramp3       | 0.0000 | No |
| 41920 | Ran         | 0.0000 | No |
| 41921 | Ranbp1      | 0.0000 | No |
| 41922 | Ranbp10     | 0.0000 | No |
| 41923 | Ranbp17     | 0.0000 | No |
| 41924 | Ranbp2      | 0.0000 | No |
| 41925 | Ranbp2-ps1  | 0.0000 | No |
| 41926 | Ranbp2-ps10 | 0.0000 | No |
| 41927 | Ranbp2-ps12 | 0.0000 | No |
| 41928 | Ranbp2-ps2  | 0.0000 | No |
| 41929 | Ranbp2-ps3  | 0.0000 | No |
| 41930 | Ranbp2-ps4  | 0.0000 | No |
| 41931 | Ranbp2-ps5  | 0.0000 | No |
| 41932 | Ranbp2-ps6  | 0.0000 | No |
| 41933 | Ranbp2-ps7  | 0.0000 | No |
| 41934 | Ranbp2-ps8  | 0.0000 | No |
| 41935 | Ranbp2-ps9  | 0.0000 | No |
| 41936 | Ranbp3      | 0.0000 | No |
| 41937 | Ranbp3l     | 0.0000 | No |
| 41938 | Ranbp6      | 0.0000 | No |
| 41939 | Ranbp9      | 0.0000 | No |
| 41940 | Rangap1     | 0.0000 | No |
| 41941 | Rangrf      | 0.0000 | No |
| 41942 | Rap1a       | 0.0000 | No |
| 41943 | Rap1a-ps2   | 0.0000 | No |
| 41944 | Rap1b       | 0.0000 | No |
| 41945 | Rap1gap2    | 0.0000 | No |
| 41946 | Rap1gapos   | 0.0000 | No |
| 41947 | Rap1gds1    | 0.0000 | No |
| 41948 | Rap2a       | 0.0000 | No |
| 41949 | Rap2b       | 0.0000 | No |



|       |            |        |    |
|-------|------------|--------|----|
| 41950 | Rap2c      | 0.0000 | No |
| 41951 | Rapgef1    | 0.0000 | No |
| 41952 | Rapgef2    | 0.0000 | No |
| 41953 | Rapgef3    | 0.0000 | No |
| 41954 | Rapgef3os1 | 0.0000 | No |
| 41955 | Rapgef3os2 | 0.0000 | No |
| 41956 | Rapgef4os1 | 0.0000 | No |
| 41957 | Rapgef5    | 0.0000 | No |
| 41958 | Rapgef6    | 0.0000 | No |
| 41959 | Rapgef11   | 0.0000 | No |
| 41960 | Raph1      | 0.0000 | No |
| 41961 | Rapsn      | 0.0000 | No |
| 41962 | Rara       | 0.0000 | No |
| 41963 | Rarb       | 0.0000 | No |
| 41964 | Rarres1    | 0.0000 | No |
| 41965 | Rarres2    | 0.0000 | No |
| 41966 | Rars       | 0.0000 | No |
| 41967 | Rars2      | 0.0000 | No |
| 41968 | Rasa1      | 0.0000 | No |
| 41969 | Rasa2      | 0.0000 | No |
| 41970 | Rasa3      | 0.0000 | No |
| 41971 | Rasa4      | 0.0000 | No |
| 41972 | Rasal2     | 0.0000 | No |
| 41973 | Rasd1      | 0.0000 | No |
| 41974 | Rasd2      | 0.0000 | No |
| 41975 | Rasef      | 0.0000 | No |
| 41976 | Rasgef1a   | 0.0000 | No |
| 41977 | Rasgrf1    | 0.0000 | No |
| 41978 | Rasgrf2    | 0.0000 | No |
| 41979 | Rasgrp2    | 0.0000 | No |
| 41980 | Rasgrp4    | 0.0000 | No |
| 41981 | Rasip1     | 0.0000 | No |
| 41982 | Rasl10b    | 0.0000 | No |
| 41983 | Rasl11a    | 0.0000 | No |
| 41984 | Rasl11b    | 0.0000 | No |
| 41985 | Rasl12     | 0.0000 | No |
| 41986 | Rasl2-9    | 0.0000 | No |
| 41987 | Rassf10    | 0.0000 | No |
| 41988 | Rassf2     | 0.0000 | No |
| 41989 | Rassf3     | 0.0000 | No |
| 41990 | Rassf5     | 0.0000 | No |
| 41991 | Rassf6     | 0.0000 | No |
| 41992 | Rassf7     | 0.0000 | No |
| 41993 | Rassf8     | 0.0000 | No |
| 41994 | Rassf9     | 0.0000 | No |
| 41995 | Raver2     | 0.0000 | No |

|       |         |        |    |
|-------|---------|--------|----|
| 41996 | Raxos1  | 0.0000 | No |
| 41997 | Rb1     | 0.0000 | No |
| 41998 | Rblcc1  | 0.0000 | No |
| 41999 | Rbak    | 0.0000 | No |
| 42000 | Rbakdn  | 0.0000 | No |
| 42001 | Rbbp4   | 0.0000 | No |
| 42002 | Rbbp5   | 0.0000 | No |
| 42003 | Rbbp6   | 0.0000 | No |
| 42004 | Rbbp7   | 0.0000 | No |
| 42005 | Rbbp8   | 0.0000 | No |
| 42006 | Rbbp8nl | 0.0000 | No |
| 42007 | Rbbp9   | 0.0000 | No |
| 42008 | Rbck1   | 0.0000 | No |
| 42009 | Rbfa    | 0.0000 | No |
| 42010 | Rbfox1  | 0.0000 | No |
| 42011 | Rbfox2  | 0.0000 | No |
| 42012 | Rbfox3  | 0.0000 | No |
| 42013 | Rbl1    | 0.0000 | No |
| 42014 | Rbl2    | 0.0000 | No |
| 42015 | Rbm10   | 0.0000 | No |
| 42016 | Rbm12   | 0.0000 | No |
| 42017 | Rbm12b1 | 0.0000 | No |
| 42018 | Rbm12b2 | 0.0000 | No |
| 42019 | Rbm14   | 0.0000 | No |
| 42020 | Rbm15   | 0.0000 | No |
| 42021 | Rbm15b  | 0.0000 | No |
| 42022 | Rbm17   | 0.0000 | No |
| 42023 | Rbm18   | 0.0000 | No |
| 42024 | Rbm19   | 0.0000 | No |
| 42025 | Rbm20   | 0.0000 | No |
| 42026 | Rbm22   | 0.0000 | No |
| 42027 | Rbm24   | 0.0000 | No |
| 42028 | Rbm25   | 0.0000 | No |
| 42029 | Rbm26   | 0.0000 | No |
| 42030 | Rbm27   | 0.0000 | No |
| 42031 | Rbm28   | 0.0000 | No |
| 42032 | Rbm31y  | 0.0000 | No |
| 42033 | Rbm33   | 0.0000 | No |
| 42034 | Rbm34   | 0.0000 | No |
| 42035 | Rbm39   | 0.0000 | No |
| 42036 | Rbm3os  | 0.0000 | No |
| 42037 | Rbm4    | 0.0000 | No |
| 42038 | Rbm41   | 0.0000 | No |
| 42039 | Rbm42   | 0.0000 | No |
| 42040 | Rbm43   | 0.0000 | No |
| 42041 | Rbm44   | 0.0000 | No |

|       |            |        |    |
|-------|------------|--------|----|
| 42042 | Rbm45      | 0.0000 | No |
| 42043 | Rbm46      | 0.0000 | No |
| 42044 | Rbm46os    | 0.0000 | No |
| 42045 | Rbm47      | 0.0000 | No |
| 42046 | Rbm48      | 0.0000 | No |
| 42047 | Rbm4b      | 0.0000 | No |
| 42048 | Rbm5       | 0.0000 | No |
| 42049 | Rbm6       | 0.0000 | No |
| 42050 | Rbm6-ps1   | 0.0000 | No |
| 42051 | Rbm6-ps2   | 0.0000 | No |
| 42052 | Rbm7       | 0.0000 | No |
| 42053 | Rbm8a      | 0.0000 | No |
| 42054 | Rbm8a2     | 0.0000 | No |
| 42055 | Rbms1      | 0.0000 | No |
| 42056 | Rbms2      | 0.0000 | No |
| 42057 | Rbms3      | 0.0000 | No |
| 42058 | Rbmx       | 0.0000 | No |
| 42059 | Rbmx2      | 0.0000 | No |
| 42060 | Rbmx2-ps   | 0.0000 | No |
| 42061 | Rbmx11     | 0.0000 | No |
| 42062 | Rbmx12     | 0.0000 | No |
| 42063 | Rbmy       | 0.0000 | No |
| 42064 | Rbp2       | 0.0000 | No |
| 42065 | Rbp4       | 0.0000 | No |
| 42066 | Rbpj       | 0.0000 | No |
| 42067 | Rbpsuh-ps1 | 0.0000 | No |
| 42068 | Rbpsuh-rs3 | 0.0000 | No |
| 42069 | Rbsn       | 0.0000 | No |
| 42070 | Rbx1       | 0.0000 | No |
| 42071 | Rc3h1      | 0.0000 | No |
| 42072 | Rc3h2      | 0.0000 | No |
| 42073 | Rcan1      | 0.0000 | No |
| 42074 | Rcan2      | 0.0000 | No |
| 42075 | Rcan3      | 0.0000 | No |
| 42076 | Rcbtb1     | 0.0000 | No |
| 42077 | Rcbtb2     | 0.0000 | No |
| 42078 | Rcc1       | 0.0000 | No |
| 42079 | Rcc2       | 0.0000 | No |
| 42080 | Rccd1      | 0.0000 | No |
| 42081 | Rce1       | 0.0000 | No |
| 42082 | Rchy1      | 0.0000 | No |
| 42083 | Rcl1       | 0.0000 | No |
| 42084 | Rcn1       | 0.0000 | No |
| 42085 | Rcn2       | 0.0000 | No |
| 42086 | Rcn3       | 0.0000 | No |
| 42087 | Rcor1      | 0.0000 | No |

|       |           |        |    |
|-------|-----------|--------|----|
| 42088 | Rcor2     | 0.0000 | No |
| 42089 | Rcor3     | 0.0000 | No |
| 42090 | Rcsd1     | 0.0000 | No |
| 42091 | Rcvrn     | 0.0000 | No |
| 42092 | Rd3       | 0.0000 | No |
| 42093 | Rdh1      | 0.0000 | No |
| 42094 | Rdh10     | 0.0000 | No |
| 42095 | Rdh11     | 0.0000 | No |
| 42096 | Rdh12     | 0.0000 | No |
| 42097 | Rdh13     | 0.0000 | No |
| 42098 | Rdh14     | 0.0000 | No |
| 42099 | Rdh19     | 0.0000 | No |
| 42100 | Rdh5      | 0.0000 | No |
| 42101 | Rdh7      | 0.0000 | No |
| 42102 | Rdh9      | 0.0000 | No |
| 42103 | Rdm1      | 0.0000 | No |
| 42104 | Rdx       | 0.0000 | No |
| 42105 | Rec114    | 0.0000 | No |
| 42106 | Rec8      | 0.0000 | No |
| 42107 | Reck      | 0.0000 | No |
| 42108 | Recql     | 0.0000 | No |
| 42109 | Recql4    | 0.0000 | No |
| 42110 | Recql5    | 0.0000 | No |
| 42111 | Recql5os1 | 0.0000 | No |
| 42112 | Redrum    | 0.0000 | No |
| 42113 | Reep1     | 0.0000 | No |
| 42114 | Reep2     | 0.0000 | No |
| 42115 | Reep3     | 0.0000 | No |
| 42116 | Reep4     | 0.0000 | No |
| 42117 | Reep5     | 0.0000 | No |
| 42118 | Reep6     | 0.0000 | No |
| 42119 | Reg1      | 0.0000 | No |
| 42120 | Reg2      | 0.0000 | No |
| 42121 | Reg3a     | 0.0000 | No |
| 42122 | Reg3b     | 0.0000 | No |
| 42123 | Reg3d     | 0.0000 | No |
| 42124 | Reg3g     | 0.0000 | No |
| 42125 | Reg4      | 0.0000 | No |
| 42126 | Rel       | 0.0000 | No |
| 42127 | Rela      | 0.0000 | No |
| 42128 | Relb      | 0.0000 | No |
| 42129 | Rel11     | 0.0000 | No |
| 42130 | Rel12     | 0.0000 | No |
| 42131 | Reln      | 0.0000 | No |
| 42132 | Relt      | 0.0000 | No |
| 42133 | Rem1      | 0.0000 | No |

|       |        |        |    |
|-------|--------|--------|----|
| 42134 | Rem2   | 0.0000 | No |
| 42135 | Ren1   | 0.0000 | No |
| 42136 | Renbp  | 0.0000 | No |
| 42137 | Repin1 | 0.0000 | No |
| 42138 | Reps1  | 0.0000 | No |
| 42139 | Reps2  | 0.0000 | No |
| 42140 | Rer1   | 0.0000 | No |
| 42141 | Rere   | 0.0000 | No |
| 42142 | Rerg   | 0.0000 | No |
| 42143 | Rergl  | 0.0000 | No |
| 42144 | Rest   | 0.0000 | No |
| 42145 | Ret    | 0.0000 | No |
| 42146 | Retn   | 0.0000 | No |
| 42147 | Retnlg | 0.0000 | No |
| 42148 | Retsat | 0.0000 | No |
| 42149 | Rev1   | 0.0000 | No |
| 42150 | Rev3l  | 0.0000 | No |
| 42151 | Rex2   | 0.0000 | No |
| 42152 | Rexo1  | 0.0000 | No |
| 42153 | Rexo2  | 0.0000 | No |
| 42154 | Rexo4  | 0.0000 | No |
| 42155 | Rfc1   | 0.0000 | No |
| 42156 | Rfc2   | 0.0000 | No |
| 42157 | Rfc3   | 0.0000 | No |
| 42158 | Rfc4   | 0.0000 | No |
| 42159 | Rfc5   | 0.0000 | No |
| 42160 | Rfesd  | 0.0000 | No |
| 42161 | Rffl   | 0.0000 | No |
| 42162 | Rfk    | 0.0000 | No |
| 42163 | Rflna  | 0.0000 | No |
| 42164 | Rflnb  | 0.0000 | No |
| 42165 | Rfng   | 0.0000 | No |
| 42166 | Rfpl4  | 0.0000 | No |
| 42167 | Rfpl4b | 0.0000 | No |
| 42168 | Rft1   | 0.0000 | No |
| 42169 | Rftn1  | 0.0000 | No |
| 42170 | Rftn2  | 0.0000 | No |
| 42171 | Rfwd2  | 0.0000 | No |
| 42172 | Rfwd3  | 0.0000 | No |
| 42173 | Rfx1   | 0.0000 | No |
| 42174 | Rfx2   | 0.0000 | No |
| 42175 | Rfx3   | 0.0000 | No |
| 42176 | Rfx4   | 0.0000 | No |
| 42177 | Rfx5   | 0.0000 | No |
| 42178 | Rfx6   | 0.0000 | No |
| 42179 | Rfx7   | 0.0000 | No |

|       |        |        |    |
|-------|--------|--------|----|
| 42180 | Rfx8   | 0.0000 | No |
| 42181 | Rfxank | 0.0000 | No |
| 42182 | Rfxap  | 0.0000 | No |
| 42183 | Rgag1  | 0.0000 | No |
| 42184 | Rgag4  | 0.0000 | No |
| 42185 | Rgcc   | 0.0000 | No |
| 42186 | Rgl1   | 0.0000 | No |
| 42187 | Rgl2   | 0.0000 | No |
| 42188 | Rgl3   | 0.0000 | No |
| 42189 | Rgma   | 0.0000 | No |
| 42190 | Rgmb   | 0.0000 | No |
| 42191 | Rgn    | 0.0000 | No |
| 42192 | Rgp1   | 0.0000 | No |
| 42193 | Rgr    | 0.0000 | No |
| 42194 | Rgs1   | 0.0000 | No |
| 42195 | Rgs10  | 0.0000 | No |
| 42196 | Rgs11  | 0.0000 | No |
| 42197 | Rgs12  | 0.0000 | No |
| 42198 | Rgs13  | 0.0000 | No |
| 42199 | Rgs14  | 0.0000 | No |
| 42200 | Rgs16  | 0.0000 | No |
| 42201 | Rgs17  | 0.0000 | No |
| 42202 | Rgs19  | 0.0000 | No |
| 42203 | Rgs2   | 0.0000 | No |
| 42204 | Rgs20  | 0.0000 | No |
| 42205 | Rgs21  | 0.0000 | No |
| 42206 | Rgs22  | 0.0000 | No |
| 42207 | Rgs3   | 0.0000 | No |
| 42208 | Rgs4   | 0.0000 | No |
| 42209 | Rgs5   | 0.0000 | No |
| 42210 | Rgs6   | 0.0000 | No |
| 42211 | Rgs7   | 0.0000 | No |
| 42212 | Rgs7bp | 0.0000 | No |
| 42213 | Rgs8   | 0.0000 | No |
| 42214 | Rgs9   | 0.0000 | No |
| 42215 | Rgs9bp | 0.0000 | No |
| 42216 | Rgs11  | 0.0000 | No |
| 42217 | Rhag   | 0.0000 | No |
| 42218 | Rhbdd2 | 0.0000 | No |
| 42219 | Rhbdd3 | 0.0000 | No |
| 42220 | Rhbdf1 | 0.0000 | No |
| 42221 | Rhbdf2 | 0.0000 | No |
| 42222 | Rhbdl3 | 0.0000 | No |
| 42223 | Rhbg   | 0.0000 | No |
| 42224 | Rhcg   | 0.0000 | No |
| 42225 | Rhd    | 0.0000 | No |

|       |            |        |    |
|-------|------------|--------|----|
| 42226 | Rheb       | 0.0000 | No |
| 42227 | Rhebl1     | 0.0000 | No |
| 42228 | Rho        | 0.0000 | No |
| 42229 | Rhoa       | 0.0000 | No |
| 42230 | Rhoay-ps1  | 0.0000 | No |
| 42231 | Rhoay-ps2  | 0.0000 | No |
| 42232 | Rhoay-ps3  | 0.0000 | No |
| 42233 | Rhobtb1    | 0.0000 | No |
| 42234 | Rhobtb2    | 0.0000 | No |
| 42235 | Rhobtb3    | 0.0000 | No |
| 42236 | Rhod       | 0.0000 | No |
| 42237 | Rhof       | 0.0000 | No |
| 42238 | Rhog       | 0.0000 | No |
| 42239 | Rhoj       | 0.0000 | No |
| 42240 | Rhoq       | 0.0000 | No |
| 42241 | Rhot1      | 0.0000 | No |
| 42242 | Rhot2      | 0.0000 | No |
| 42243 | Rhou       | 0.0000 | No |
| 42244 | Rhov       | 0.0000 | No |
| 42245 | Rhox1      | 0.0000 | No |
| 42246 | Rhox10     | 0.0000 | No |
| 42247 | Rhox11-ps1 | 0.0000 | No |
| 42248 | Rhox11-ps2 | 0.0000 | No |
| 42249 | Rhox11-ps3 | 0.0000 | No |
| 42250 | Rhox12     | 0.0000 | No |
| 42251 | Rhox13     | 0.0000 | No |
| 42252 | Rhox2a     | 0.0000 | No |
| 42253 | Rhox2b     | 0.0000 | No |
| 42254 | Rhox2c     | 0.0000 | No |
| 42255 | Rhox2d     | 0.0000 | No |
| 42256 | Rhox2e     | 0.0000 | No |
| 42257 | Rhox2g     | 0.0000 | No |
| 42258 | Rhox2h     | 0.0000 | No |
| 42259 | Rhox2-ps   | 0.0000 | No |
| 42260 | Rhox3a     | 0.0000 | No |
| 42261 | Rhox3a2    | 0.0000 | No |
| 42262 | Rhox3b-ps  | 0.0000 | No |
| 42263 | Rhox3c     | 0.0000 | No |
| 42264 | Rhox3e     | 0.0000 | No |
| 42265 | Rhox3f     | 0.0000 | No |
| 42266 | Rhox3g     | 0.0000 | No |
| 42267 | Rhox3h     | 0.0000 | No |
| 42268 | Rhox4a     | 0.0000 | No |
| 42269 | Rhox4a2    | 0.0000 | No |
| 42270 | Rhox4b     | 0.0000 | No |
| 42271 | Rhox4c     | 0.0000 | No |

|       |           |        |    |
|-------|-----------|--------|----|
| 42272 | Rhox4d    | 0.0000 | No |
| 42273 | Rhox4e    | 0.0000 | No |
| 42274 | Rhox4f    | 0.0000 | No |
| 42275 | Rhox4g    | 0.0000 | No |
| 42276 | Rhox5     | 0.0000 | No |
| 42277 | Rhox6     | 0.0000 | No |
| 42278 | Rhox7a    | 0.0000 | No |
| 42279 | Rhox7b    | 0.0000 | No |
| 42280 | Rhox7-ps1 | 0.0000 | No |
| 42281 | Rhox7-ps2 | 0.0000 | No |
| 42282 | Rhox8     | 0.0000 | No |
| 42283 | Rhox9     | 0.0000 | No |
| 42284 | Rhpn1     | 0.0000 | No |
| 42285 | Rhpn2     | 0.0000 | No |
| 42286 | Rian      | 0.0000 | No |
| 42287 | Ribc1     | 0.0000 | No |
| 42288 | Ribc2     | 0.0000 | No |
| 42289 | Ric1      | 0.0000 | No |
| 42290 | Ric8a     | 0.0000 | No |
| 42291 | Ric8b     | 0.0000 | No |
| 42292 | Rictor    | 0.0000 | No |
| 42293 | Rida      | 0.0000 | No |
| 42294 | Rif1      | 0.0000 | No |
| 42295 | Riid1     | 0.0000 | No |
| 42296 | Rilp      | 0.0000 | No |
| 42297 | Rilpl1    | 0.0000 | No |
| 42298 | Rilpl2    | 0.0000 | No |
| 42299 | Rimbp2    | 0.0000 | No |
| 42300 | Rimbp3    | 0.0000 | No |
| 42301 | Rimkla    | 0.0000 | No |
| 42302 | Rimklb    | 0.0000 | No |
| 42303 | Rims1     | 0.0000 | No |
| 42304 | Rims2     | 0.0000 | No |
| 42305 | Rims3     | 0.0000 | No |
| 42306 | Rims4     | 0.0000 | No |
| 42307 | Rin1      | 0.0000 | No |
| 42308 | Rin2      | 0.0000 | No |
| 42309 | Ring1     | 0.0000 | No |
| 42310 | Rinl      | 0.0000 | No |
| 42311 | Rint1     | 0.0000 | No |
| 42312 | Riok1     | 0.0000 | No |
| 42313 | Riok3     | 0.0000 | No |
| 42314 | Ripk1     | 0.0000 | No |
| 42315 | Ripk2     | 0.0000 | No |
| 42316 | Ripk3     | 0.0000 | No |
| 42317 | Ripk4     | 0.0000 | No |



|       |          |        |    |
|-------|----------|--------|----|
| 42318 | Ripply2  | 0.0000 | No |
| 42319 | Ripply3  | 0.0000 | No |
| 42320 | Rit1     | 0.0000 | No |
| 42321 | Rit2     | 0.0000 | No |
| 42322 | Rita1    | 0.0000 | No |
| 42323 | Rlbp1    | 0.0000 | No |
| 42324 | Rlf      | 0.0000 | No |
| 42325 | Rlim     | 0.0000 | No |
| 42326 | Rln1     | 0.0000 | No |
| 42327 | Rmdn1    | 0.0000 | No |
| 42328 | Rmdn2    | 0.0000 | No |
| 42329 | Rmdn3    | 0.0000 | No |
| 42330 | Rmi1     | 0.0000 | No |
| 42331 | Rmi2     | 0.0000 | No |
| 42332 | Rmnd1    | 0.0000 | No |
| 42333 | Rmnd5a   | 0.0000 | No |
| 42334 | Rmnd5b   | 0.0000 | No |
| 42335 | Rmst     | 0.0000 | No |
| 42336 | RMST_1   | 0.0000 | No |
| 42337 | Rn7s1    | 0.0000 | No |
| 42338 | Rn7s2    | 0.0000 | No |
| 42339 | Rn7s6    | 0.0000 | No |
| 42340 | Rn7sk    | 0.0000 | No |
| 42341 | Rnase1   | 0.0000 | No |
| 42342 | Rnase10  | 0.0000 | No |
| 42343 | Rnase13  | 0.0000 | No |
| 42344 | Rnase2a  | 0.0000 | No |
| 42345 | Rnase4   | 0.0000 | No |
| 42346 | Rnase9   | 0.0000 | No |
| 42347 | Rnaseh1  | 0.0000 | No |
| 42348 | Rnaseh2a | 0.0000 | No |
| 42349 | Rnaseh2b | 0.0000 | No |
| 42350 | Rnaseh2c | 0.0000 | No |
| 42351 | Rnasek   | 0.0000 | No |
| 42352 | Rnase1   | 0.0000 | No |
| 42353 | Rnaset2a | 0.0000 | No |
| 42354 | Rnaset2b | 0.0000 | No |
| 42355 | Rncr4    | 0.0000 | No |
| 42356 | Rnd1     | 0.0000 | No |
| 42357 | Rnd2     | 0.0000 | No |
| 42358 | Rnd3     | 0.0000 | No |
| 42359 | Rnf10    | 0.0000 | No |
| 42360 | Rnf103   | 0.0000 | No |
| 42361 | Rnf11    | 0.0000 | No |
| 42362 | Rnf111   | 0.0000 | No |
| 42363 | Rnf112   | 0.0000 | No |

|       |           |        |    |
|-------|-----------|--------|----|
| 42364 | Rnf113a1  | 0.0000 | No |
| 42365 | Rnf113a2  | 0.0000 | No |
| 42366 | Rnf114    | 0.0000 | No |
| 42367 | Rnf115    | 0.0000 | No |
| 42368 | Rnf121    | 0.0000 | No |
| 42369 | Rnf122    | 0.0000 | No |
| 42370 | Rnf123    | 0.0000 | No |
| 42371 | Rnf125    | 0.0000 | No |
| 42372 | Rnf126    | 0.0000 | No |
| 42373 | Rnf13     | 0.0000 | No |
| 42374 | Rnf135    | 0.0000 | No |
| 42375 | Rnf138    | 0.0000 | No |
| 42376 | Rnf138rt1 | 0.0000 | No |
| 42377 | Rnf139    | 0.0000 | No |
| 42378 | Rnf14     | 0.0000 | No |
| 42379 | Rnf141    | 0.0000 | No |
| 42380 | Rnf144b   | 0.0000 | No |
| 42381 | Rnf145    | 0.0000 | No |
| 42382 | Rnf146    | 0.0000 | No |
| 42383 | Rnf148    | 0.0000 | No |
| 42384 | Rnf149    | 0.0000 | No |
| 42385 | Rnf150    | 0.0000 | No |
| 42386 | Rnf151    | 0.0000 | No |
| 42387 | Rnf152    | 0.0000 | No |
| 42388 | Rnf165    | 0.0000 | No |
| 42389 | Rnf166    | 0.0000 | No |
| 42390 | Rnf167    | 0.0000 | No |
| 42391 | Rnf168    | 0.0000 | No |
| 42392 | Rnf169    | 0.0000 | No |
| 42393 | Rnf17     | 0.0000 | No |
| 42394 | Rnf170    | 0.0000 | No |
| 42395 | Rnf170-ps | 0.0000 | No |
| 42396 | Rnf180    | 0.0000 | No |
| 42397 | Rnf181    | 0.0000 | No |
| 42398 | Rnf182    | 0.0000 | No |
| 42399 | Rnf183    | 0.0000 | No |
| 42400 | Rnf185    | 0.0000 | No |
| 42401 | Rnf186    | 0.0000 | No |
| 42402 | Rnf187    | 0.0000 | No |
| 42403 | Rnf19b    | 0.0000 | No |
| 42404 | Rnf20     | 0.0000 | No |
| 42405 | Rnf207    | 0.0000 | No |
| 42406 | Rnf208    | 0.0000 | No |
| 42407 | Rnf212    | 0.0000 | No |
| 42408 | Rnf213    | 0.0000 | No |
| 42409 | Rnf214    | 0.0000 | No |

|       |         |        |    |
|-------|---------|--------|----|
| 42410 | Rnf215  | 0.0000 | No |
| 42411 | Rnf216  | 0.0000 | No |
| 42412 | Rnf217  | 0.0000 | No |
| 42413 | Rnf219  | 0.0000 | No |
| 42414 | Rnf220  | 0.0000 | No |
| 42415 | Rnf222  | 0.0000 | No |
| 42416 | Rnf223  | 0.0000 | No |
| 42417 | Rnf224  | 0.0000 | No |
| 42418 | Rnf225  | 0.0000 | No |
| 42419 | Rnf24   | 0.0000 | No |
| 42420 | Rnf25   | 0.0000 | No |
| 42421 | Rnf26   | 0.0000 | No |
| 42422 | Rnf31   | 0.0000 | No |
| 42423 | Rnf32   | 0.0000 | No |
| 42424 | Rnf34   | 0.0000 | No |
| 42425 | Rnf38   | 0.0000 | No |
| 42426 | Rnf39   | 0.0000 | No |
| 42427 | Rnf4    | 0.0000 | No |
| 42428 | Rnf40   | 0.0000 | No |
| 42429 | Rnf41   | 0.0000 | No |
| 42430 | Rnf44   | 0.0000 | No |
| 42431 | Rnf5    | 0.0000 | No |
| 42432 | Rnf6    | 0.0000 | No |
| 42433 | Rnf7    | 0.0000 | No |
| 42434 | Rnf8    | 0.0000 | No |
| 42435 | Rnft1   | 0.0000 | No |
| 42436 | Rnft2   | 0.0000 | No |
| 42437 | Rngtt   | 0.0000 | No |
| 42438 | Rnh1    | 0.0000 | No |
| 42439 | Rnls    | 0.0000 | No |
| 42440 | Rnmt    | 0.0000 | No |
| 42441 | Rnmt11  | 0.0000 | No |
| 42442 | Rnpc3   | 0.0000 | No |
| 42443 | Rnpep   | 0.0000 | No |
| 42444 | Rnpepl1 | 0.0000 | No |
| 42445 | Rnps1   | 0.0000 | No |
| 42446 | Rnu11   | 0.0000 | No |
| 42447 | Rnu12   | 0.0000 | No |
| 42448 | Rnu1a1  | 0.0000 | No |
| 42449 | Rnu1b1  | 0.0000 | No |
| 42450 | Rnu1b2  | 0.0000 | No |
| 42451 | Rnu1b6  | 0.0000 | No |
| 42452 | Rnu2-10 | 0.0000 | No |
| 42453 | Rnu3b1  | 0.0000 | No |
| 42454 | Rnu3b2  | 0.0000 | No |
| 42455 | Rnu5g   | 0.0000 | No |

|       |               |        |    |
|-------|---------------|--------|----|
| 42456 | Rnu6          | 0.0000 | No |
| 42457 | Rnu6-ps2      | 0.0000 | No |
| 42458 | Rnu7          | 0.0000 | No |
| 42459 | Rnu73b        | 0.0000 | No |
| 42460 | Rny3          | 0.0000 | No |
| 42461 | Robo1         | 0.0000 | No |
| 42462 | Robo2         | 0.0000 | No |
| 42463 | Robo3         | 0.0000 | No |
| 42464 | Robo4         | 0.0000 | No |
| 42465 | Rock1         | 0.0000 | No |
| 42466 | Rock2         | 0.0000 | No |
| 42467 | Rogdi         | 0.0000 | No |
| 42468 | Rom1          | 0.0000 | No |
| 42469 | Rom1          | 0.0000 | No |
| 42470 | Ropn1         | 0.0000 | No |
| 42471 | Ropn11        | 0.0000 | No |
| 42472 | Ror1          | 0.0000 | No |
| 42473 | Rorc          | 0.0000 | No |
| 42474 | Ros1          | 0.0000 | No |
| 42475 | Rp1           | 0.0000 | No |
| 42476 | Rp111         | 0.0000 | No |
| 42477 | Rp2           | 0.0000 | No |
| 42478 | RP23-100B15.6 | 0.0000 | No |
| 42479 | RP23-100B15.8 | 0.0000 | No |
| 42480 | RP23-100C12.1 | 0.0000 | No |
| 42481 | RP23-100C12.2 | 0.0000 | No |
| 42482 | RP23-100M12.6 | 0.0000 | No |
| 42483 | RP23-100M12.7 | 0.0000 | No |
| 42484 | RP23-101F14.3 | 0.0000 | No |
| 42485 | RP23-102O12.1 | 0.0000 | No |
| 42486 | RP23-103E11.7 | 0.0000 | No |
| 42487 | RP23-103I7.1  | 0.0000 | No |
| 42488 | RP23-103O7.1  | 0.0000 | No |
| 42489 | RP23-103O7.2  | 0.0000 | No |
| 42490 | RP23-104D6.2  | 0.0000 | No |
| 42491 | RP23-104D6.4  | 0.0000 | No |
| 42492 | RP23-104D6.8  | 0.0000 | No |
| 42493 | RP23-106F10.1 | 0.0000 | No |
| 42494 | RP23-106F10.2 | 0.0000 | No |
| 42495 | RP23-106G8.3  | 0.0000 | No |
| 42496 | RP23-106I21.5 | 0.0000 | No |
| 42497 | RP23-110E20.5 | 0.0000 | No |
| 42498 | RP23-114A6.7  | 0.0000 | No |
| 42499 | RP23-114B10.2 | 0.0000 | No |
| 42500 | RP23-114B10.5 | 0.0000 | No |
| 42501 | RP23-114B10.6 | 0.0000 | No |

|       |               |        |    |
|-------|---------------|--------|----|
| 42502 | RP23-114G13.1 | 0.0000 | No |
| 42503 | RP23-114G13.4 | 0.0000 | No |
| 42504 | RP23-114G13.5 | 0.0000 | No |
| 42505 | RP23-114G13.7 | 0.0000 | No |
| 42506 | RP23-114L5.4  | 0.0000 | No |
| 42507 | RP23-114N1.10 | 0.0000 | No |
| 42508 | RP23-114N1.9  | 0.0000 | No |
| 42509 | RP23-115A18.1 | 0.0000 | No |
| 42510 | RP23-115A18.3 | 0.0000 | No |
| 42511 | RP23-115O21.3 | 0.0000 | No |
| 42512 | RP23-116C19.2 | 0.0000 | No |
| 42513 | RP23-116C19.3 | 0.0000 | No |
| 42514 | RP23-116E8.1  | 0.0000 | No |
| 42515 | RP23-116E8.2  | 0.0000 | No |
| 42516 | RP23-116P18.5 | 0.0000 | No |
| 42517 | RP23-117H14.1 | 0.0000 | No |
| 42518 | RP23-118I16.1 | 0.0000 | No |
| 42519 | RP23-118I16.2 | 0.0000 | No |
| 42520 | RP23-118M23.8 | 0.0000 | No |
| 42521 | RP23-119E2.1  | 0.0000 | No |
| 42522 | RP23-11B13.2  | 0.0000 | No |
| 42523 | RP23-11B13.4  | 0.0000 | No |
| 42524 | RP23-11D11.1  | 0.0000 | No |
| 42525 | RP23-120C8.2  | 0.0000 | No |
| 42526 | RP23-120C8.3  | 0.0000 | No |
| 42527 | RP23-120C8.4  | 0.0000 | No |
| 42528 | RP23-120C8.5  | 0.0000 | No |
| 42529 | RP23-120C8.6  | 0.0000 | No |
| 42530 | RP23-120C8.7  | 0.0000 | No |
| 42531 | RP23-120C8.9  | 0.0000 | No |
| 42532 | RP23-120N6.1  | 0.0000 | No |
| 42533 | RP23-120N6.2  | 0.0000 | No |
| 42534 | RP23-121M22.6 | 0.0000 | No |
| 42535 | RP23-122B15.1 | 0.0000 | No |
| 42536 | RP23-122B15.2 | 0.0000 | No |
| 42537 | RP23-123D6.10 | 0.0000 | No |
| 42538 | RP23-127B8.7  | 0.0000 | No |
| 42539 | RP23-127K18.2 | 0.0000 | No |
| 42540 | RP23-128A23.3 | 0.0000 | No |
| 42541 | RP23-128C4.2  | 0.0000 | No |
| 42542 | RP23-128C4.4  | 0.0000 | No |
| 42543 | RP23-129C12.8 | 0.0000 | No |
| 42544 | RP23-12D16.1  | 0.0000 | No |
| 42545 | RP23-12I4.3   | 0.0000 | No |
| 42546 | RP23-12I4.4   | 0.0000 | No |
| 42547 | RP23-12I4.5   | 0.0000 | No |

|       |               |        |    |
|-------|---------------|--------|----|
| 42548 | RP23-12I4.6   | 0.0000 | No |
| 42549 | RP23-12I4.7   | 0.0000 | No |
| 42550 | RP23-12L5.1   | 0.0000 | No |
| 42551 | RP23-12L5.3   | 0.0000 | No |
| 42552 | RP23-130L13.2 | 0.0000 | No |
| 42553 | RP23-130P17.4 | 0.0000 | No |
| 42554 | RP23-131E21.2 | 0.0000 | No |
| 42555 | RP23-131H17.1 | 0.0000 | No |
| 42556 | RP23-132B15.3 | 0.0000 | No |
| 42557 | RP23-132B15.4 | 0.0000 | No |
| 42558 | RP23-132J19.1 | 0.0000 | No |
| 42559 | RP23-133A3.4  | 0.0000 | No |
| 42560 | RP23-133A3.5  | 0.0000 | No |
| 42561 | RP23-134M7.1  | 0.0000 | No |
| 42562 | RP23-134M7.2  | 0.0000 | No |
| 42563 | RP23-134M7.3  | 0.0000 | No |
| 42564 | RP23-135K11.2 | 0.0000 | No |
| 42565 | RP23-136G17.1 | 0.0000 | No |
| 42566 | RP23-137G18.2 | 0.0000 | No |
| 42567 | RP23-138K22.1 | 0.0000 | No |
| 42568 | RP23-138K22.2 | 0.0000 | No |
| 42569 | RP23-138K22.3 | 0.0000 | No |
| 42570 | RP23-138K22.4 | 0.0000 | No |
| 42571 | RP23-138K22.5 | 0.0000 | No |
| 42572 | RP23-139G11.1 | 0.0000 | No |
| 42573 | RP23-13G1.8   | 0.0000 | No |
| 42574 | RP23-13G1.9   | 0.0000 | No |
| 42575 | RP23-143B2.2  | 0.0000 | No |
| 42576 | RP23-143D12.4 | 0.0000 | No |
| 42577 | RP23-144A12.2 | 0.0000 | No |
| 42578 | RP23-144D3.3  | 0.0000 | No |
| 42579 | RP23-144H18.4 | 0.0000 | No |
| 42580 | RP23-144H18.5 | 0.0000 | No |
| 42581 | RP23-144H18.6 | 0.0000 | No |
| 42582 | RP23-144N15.3 | 0.0000 | No |
| 42583 | RP23-145G7.3  | 0.0000 | No |
| 42584 | RP23-145I16.5 | 0.0000 | No |
| 42585 | RP23-146A22.1 | 0.0000 | No |
| 42586 | RP23-146A22.7 | 0.0000 | No |
| 42587 | RP23-146J17.3 | 0.0000 | No |
| 42588 | RP23-147D3.8  | 0.0000 | No |
| 42589 | RP23-149D5.7  | 0.0000 | No |
| 42590 | RP23-14P17.5  | 0.0000 | No |
| 42591 | RP23-152A3.2  | 0.0000 | No |
| 42592 | RP23-152A3.3  | 0.0000 | No |
| 42593 | RP23-152N9.2  | 0.0000 | No |

|       |                |        |    |
|-------|----------------|--------|----|
| 42594 | RP23-157B3.5   | 0.0000 | No |
| 42595 | RP23-157B3.6   | 0.0000 | No |
| 42596 | RP23-157B3.7   | 0.0000 | No |
| 42597 | RP23-157N11.1  | 0.0000 | No |
| 42598 | RP23-157N11.4  | 0.0000 | No |
| 42599 | RP23-157N11.6  | 0.0000 | No |
| 42600 | RP23-157N11.7  | 0.0000 | No |
| 42601 | RP23-158C15.10 | 0.0000 | No |
| 42602 | RP23-158C15.6  | 0.0000 | No |
| 42603 | RP23-158C15.7  | 0.0000 | No |
| 42604 | RP23-158E1.3   | 0.0000 | No |
| 42605 | RP23-158E1.5   | 0.0000 | No |
| 42606 | RP23-158J3.1   | 0.0000 | No |
| 42607 | RP23-158J3.2   | 0.0000 | No |
| 42608 | RP23-158J3.3   | 0.0000 | No |
| 42609 | RP23-162M13.10 | 0.0000 | No |
| 42610 | RP23-162M13.11 | 0.0000 | No |
| 42611 | RP23-162M13.9  | 0.0000 | No |
| 42612 | RP23-162P10.2  | 0.0000 | No |
| 42613 | RP23-162P10.3  | 0.0000 | No |
| 42614 | RP23-162P10.7  | 0.0000 | No |
| 42615 | RP23-162P10.8  | 0.0000 | No |
| 42616 | RP23-163N19.1  | 0.0000 | No |
| 42617 | RP23-163N19.3  | 0.0000 | No |
| 42618 | RP23-164P21.3  | 0.0000 | No |
| 42619 | RP23-16C4.1    | 0.0000 | No |
| 42620 | RP23-171E18.5  | 0.0000 | No |
| 42621 | RP23-174E11.2  | 0.0000 | No |
| 42622 | RP23-175C23.1  | 0.0000 | No |
| 42623 | RP23-175C23.2  | 0.0000 | No |
| 42624 | RP23-177D16.2  | 0.0000 | No |
| 42625 | RP23-177D16.4  | 0.0000 | No |
| 42626 | RP23-177D16.5  | 0.0000 | No |
| 42627 | RP23-180C14.3  | 0.0000 | No |
| 42628 | RP23-180C14.4  | 0.0000 | No |
| 42629 | RP23-180C14.5  | 0.0000 | No |
| 42630 | RP23-181A8.2   | 0.0000 | No |
| 42631 | RP23-181A8.4   | 0.0000 | No |
| 42632 | RP23-182F18.1  | 0.0000 | No |
| 42633 | RP23-183P1.1   | 0.0000 | No |
| 42634 | RP23-183P1.2   | 0.0000 | No |
| 42635 | RP23-185O8.1   | 0.0000 | No |
| 42636 | RP23-186B12.2  | 0.0000 | No |
| 42637 | RP23-186B12.3  | 0.0000 | No |
| 42638 | RP23-186M2.3   | 0.0000 | No |
| 42639 | RP23-186O3.11  | 0.0000 | No |

|       |                |        |    |
|-------|----------------|--------|----|
| 42640 | RP23-186O3.13  | 0.0000 | No |
| 42641 | RP23-186O3.14  | 0.0000 | No |
| 42642 | RP23-187B11.10 | 0.0000 | No |
| 42643 | RP23-187B11.11 | 0.0000 | No |
| 42644 | RP23-187B11.13 | 0.0000 | No |
| 42645 | RP23-187B11.14 | 0.0000 | No |
| 42646 | RP23-187B11.16 | 0.0000 | No |
| 42647 | RP23-187B11.7  | 0.0000 | No |
| 42648 | RP23-187B11.8  | 0.0000 | No |
| 42649 | RP23-188E3.1   | 0.0000 | No |
| 42650 | RP23-188E3.2   | 0.0000 | No |
| 42651 | RP23-188F7.1   | 0.0000 | No |
| 42652 | RP23-189N8.4   | 0.0000 | No |
| 42653 | RP23-190H11.8  | 0.0000 | No |
| 42654 | RP23-190N21.2  | 0.0000 | No |
| 42655 | RP23-191M12.1  | 0.0000 | No |
| 42656 | RP23-191M12.2  | 0.0000 | No |
| 42657 | RP23-193M8.3   | 0.0000 | No |
| 42658 | RP23-193N1.2   | 0.0000 | No |
| 42659 | RP23-194O23.2  | 0.0000 | No |
| 42660 | RP23-194O23.3  | 0.0000 | No |
| 42661 | RP23-194O23.4  | 0.0000 | No |
| 42662 | RP23-196E17.1  | 0.0000 | No |
| 42663 | RP23-196E17.2  | 0.0000 | No |
| 42664 | RP23-197K11.6  | 0.0000 | No |
| 42665 | RP23-198D4.2   | 0.0000 | No |
| 42666 | RP23-199A2.7   | 0.0000 | No |
| 42667 | RP23-199G2.2   | 0.0000 | No |
| 42668 | RP23-202K1.1   | 0.0000 | No |
| 42669 | RP23-203D1.3   | 0.0000 | No |
| 42670 | RP23-203P12.5  | 0.0000 | No |
| 42671 | RP23-204B12.4  | 0.0000 | No |
| 42672 | RP23-204I16.2  | 0.0000 | No |
| 42673 | RP23-204I16.3  | 0.0000 | No |
| 42674 | RP23-205H11.3  | 0.0000 | No |
| 42675 | RP23-207J12.1  | 0.0000 | No |
| 42676 | RP23-207L3.1   | 0.0000 | No |
| 42677 | RP23-208K9.1   | 0.0000 | No |
| 42678 | RP23-20I24.2   | 0.0000 | No |
| 42679 | RP23-212C9.1   | 0.0000 | No |
| 42680 | RP23-212C9.2   | 0.0000 | No |
| 42681 | RP23-212F18.1  | 0.0000 | No |
| 42682 | RP23-212H13.2  | 0.0000 | No |
| 42683 | RP23-212H13.3  | 0.0000 | No |
| 42684 | RP23-212H13.4  | 0.0000 | No |
| 42685 | RP23-212H13.6  | 0.0000 | No |



|       |                |        |    |
|-------|----------------|--------|----|
| 42686 | RP23-212H13.8  | 0.0000 | No |
| 42687 | RP23-212M11.1  | 0.0000 | No |
| 42688 | RP23-212M11.2  | 0.0000 | No |
| 42689 | RP23-213P10.1  | 0.0000 | No |
| 42690 | RP23-213P10.2  | 0.0000 | No |
| 42691 | RP23-216O10.11 | 0.0000 | No |
| 42692 | RP23-218I3.4   | 0.0000 | No |
| 42693 | RP23-218K15.5  | 0.0000 | No |
| 42694 | RP23-21O10.1   | 0.0000 | No |
| 42695 | RP23-21O10.2   | 0.0000 | No |
| 42696 | RP23-220E13.1  | 0.0000 | No |
| 42697 | RP23-220F20.2  | 0.0000 | No |
| 42698 | RP23-222H15.13 | 0.0000 | No |
| 42699 | RP23-222H15.14 | 0.0000 | No |
| 42700 | RP23-223C15.4  | 0.0000 | No |
| 42701 | RP23-225D5.3   | 0.0000 | No |
| 42702 | RP23-225D5.4   | 0.0000 | No |
| 42703 | RP23-225H6.1   | 0.0000 | No |
| 42704 | RP23-225H6.2   | 0.0000 | No |
| 42705 | RP23-226D9.6   | 0.0000 | No |
| 42706 | RP23-227D17.1  | 0.0000 | No |
| 42707 | RP23-228B2.3   | 0.0000 | No |
| 42708 | RP23-228B2.5   | 0.0000 | No |
| 42709 | RP23-232G11.1  | 0.0000 | No |
| 42710 | RP23-236A6.2   | 0.0000 | No |
| 42711 | RP23-236A6.4   | 0.0000 | No |
| 42712 | RP23-237M15.1  | 0.0000 | No |
| 42713 | RP23-238C13.2  | 0.0000 | No |
| 42714 | RP23-23B21.1   | 0.0000 | No |
| 42715 | RP23-23P9.3    | 0.0000 | No |
| 42716 | RP23-23P9.4    | 0.0000 | No |
| 42717 | RP23-23P9.5    | 0.0000 | No |
| 42718 | RP23-23P9.7    | 0.0000 | No |
| 42719 | RP23-240G3.2   | 0.0000 | No |
| 42720 | RP23-240G3.3   | 0.0000 | No |
| 42721 | RP23-240G3.4   | 0.0000 | No |
| 42722 | RP23-241P13.4  | 0.0000 | No |
| 42723 | RP23-241P13.5  | 0.0000 | No |
| 42724 | RP23-242K3.1   | 0.0000 | No |
| 42725 | RP23-242K3.2   | 0.0000 | No |
| 42726 | RP23-242K3.3   | 0.0000 | No |
| 42727 | RP23-242K3.4   | 0.0000 | No |
| 42728 | RP23-242K3.5   | 0.0000 | No |
| 42729 | RP23-242K3.6   | 0.0000 | No |
| 42730 | RP23-242K3.7   | 0.0000 | No |
| 42731 | RP23-243D10.3  | 0.0000 | No |

|       |               |        |    |
|-------|---------------|--------|----|
| 42732 | RP23-246D7.2  | 0.0000 | No |
| 42733 | RP23-246J13.1 | 0.0000 | No |
| 42734 | RP23-247P3.2  | 0.0000 | No |
| 42735 | RP23-247P3.3  | 0.0000 | No |
| 42736 | RP23-247P3.6  | 0.0000 | No |
| 42737 | RP23-248P8.2  | 0.0000 | No |
| 42738 | RP23-249B22.1 | 0.0000 | No |
| 42739 | RP23-249B22.2 | 0.0000 | No |
| 42740 | RP23-250B18.1 | 0.0000 | No |
| 42741 | RP23-250B18.3 | 0.0000 | No |
| 42742 | RP23-252B13.6 | 0.0000 | No |
| 42743 | RP23-252J6.1  | 0.0000 | No |
| 42744 | RP23-255F14.4 | 0.0000 | No |
| 42745 | RP23-255F14.7 | 0.0000 | No |
| 42746 | RP23-255F14.9 | 0.0000 | No |
| 42747 | RP23-256D10.1 | 0.0000 | No |
| 42748 | RP23-256G5.1  | 0.0000 | No |
| 42749 | RP23-257B9.1  | 0.0000 | No |
| 42750 | RP23-257B9.2  | 0.0000 | No |
| 42751 | RP23-257B9.3  | 0.0000 | No |
| 42752 | RP23-257K20.1 | 0.0000 | No |
| 42753 | RP23-25M5.13  | 0.0000 | No |
| 42754 | RP23-260J19.5 | 0.0000 | No |
| 42755 | RP23-261O3.2  | 0.0000 | No |
| 42756 | RP23-261O3.3  | 0.0000 | No |
| 42757 | RP23-261O3.4  | 0.0000 | No |
| 42758 | RP23-262N17.1 | 0.0000 | No |
| 42759 | RP23-263C23.7 | 0.0000 | No |
| 42760 | RP23-263O15.4 | 0.0000 | No |
| 42761 | RP23-263O15.6 | 0.0000 | No |
| 42762 | RP23-263O15.7 | 0.0000 | No |
| 42763 | RP23-263O15.9 | 0.0000 | No |
| 42764 | RP23-264J18.1 | 0.0000 | No |
| 42765 | RP23-264J18.2 | 0.0000 | No |
| 42766 | RP23-264J18.4 | 0.0000 | No |
| 42767 | RP23-264J18.6 | 0.0000 | No |
| 42768 | RP23-265B15.1 | 0.0000 | No |
| 42769 | RP23-265F16.6 | 0.0000 | No |
| 42770 | RP23-267J18.1 | 0.0000 | No |
| 42771 | RP23-267J18.2 | 0.0000 | No |
| 42772 | RP23-267J18.4 | 0.0000 | No |
| 42773 | RP23-268C22.2 | 0.0000 | No |
| 42774 | RP23-268C22.3 | 0.0000 | No |
| 42775 | RP23-269H21.1 | 0.0000 | No |
| 42776 | RP23-269K2.2  | 0.0000 | No |
| 42777 | RP23-269O24.3 | 0.0000 | No |

|       |                |        |    |
|-------|----------------|--------|----|
| 42778 | RP23-269O24.5  | 0.0000 | No |
| 42779 | RP23-269O24.6  | 0.0000 | No |
| 42780 | RP23-269P7.3   | 0.0000 | No |
| 42781 | RP23-269P7.4   | 0.0000 | No |
| 42782 | RP23-269P7.5   | 0.0000 | No |
| 42783 | RP23-271F18.2  | 0.0000 | No |
| 42784 | RP23-271O7.5   | 0.0000 | No |
| 42785 | RP23-272A7.3   | 0.0000 | No |
| 42786 | RP23-274G21.4  | 0.0000 | No |
| 42787 | RP23-274G21.5  | 0.0000 | No |
| 42788 | RP23-274G21.6  | 0.0000 | No |
| 42789 | RP23-276C23.1  | 0.0000 | No |
| 42790 | RP23-276C23.2  | 0.0000 | No |
| 42791 | RP23-276C23.3  | 0.0000 | No |
| 42792 | RP23-276L18.2  | 0.0000 | No |
| 42793 | RP23-276M23.6  | 0.0000 | No |
| 42794 | RP23-277D1.1   | 0.0000 | No |
| 42795 | RP23-279O5.4   | 0.0000 | No |
| 42796 | RP23-280C13.3  | 0.0000 | No |
| 42797 | RP23-283A2.1   | 0.0000 | No |
| 42798 | RP23-284E19.10 | 0.0000 | No |
| 42799 | RP23-284E19.12 | 0.0000 | No |
| 42800 | RP23-284E19.14 | 0.0000 | No |
| 42801 | RP23-285E22.4  | 0.0000 | No |
| 42802 | RP23-285L15.1  | 0.0000 | No |
| 42803 | RP23-286J11.1  | 0.0000 | No |
| 42804 | RP23-288B18.2  | 0.0000 | No |
| 42805 | RP23-288C18.2  | 0.0000 | No |
| 42806 | RP23-288C18.3  | 0.0000 | No |
| 42807 | RP23-288O12.2  | 0.0000 | No |
| 42808 | RP23-290D15.1  | 0.0000 | No |
| 42809 | RP23-290L7.1   | 0.0000 | No |
| 42810 | RP23-291B1.2   | 0.0000 | No |
| 42811 | RP23-291C4.1   | 0.0000 | No |
| 42812 | RP23-291C4.2   | 0.0000 | No |
| 42813 | RP23-291C4.3   | 0.0000 | No |
| 42814 | RP23-291C4.4   | 0.0000 | No |
| 42815 | RP23-292C5.8   | 0.0000 | No |
| 42816 | RP23-292G1.1   | 0.0000 | No |
| 42817 | RP23-292G1.2   | 0.0000 | No |
| 42818 | RP23-292G1.3   | 0.0000 | No |
| 42819 | RP23-292G1.4   | 0.0000 | No |
| 42820 | RP23-292G1.5   | 0.0000 | No |
| 42821 | RP23-299A23.1  | 0.0000 | No |
| 42822 | RP23-299I16.1  | 0.0000 | No |
| 42823 | RP23-299K19.6  | 0.0000 | No |

|       |               |        |    |
|-------|---------------|--------|----|
| 42824 | RP23-2D7.20   | 0.0000 | No |
| 42825 | RP23-2F19.2   | 0.0000 | No |
| 42826 | RP23-301J15.1 | 0.0000 | No |
| 42827 | RP23-301J15.2 | 0.0000 | No |
| 42828 | RP23-301M11.2 | 0.0000 | No |
| 42829 | RP23-303A11.2 | 0.0000 | No |
| 42830 | RP23-303A11.3 | 0.0000 | No |
| 42831 | RP23-304K3.2  | 0.0000 | No |
| 42832 | RP23-306P12.3 | 0.0000 | No |
| 42833 | RP23-307B15.5 | 0.0000 | No |
| 42834 | RP23-308G10.3 | 0.0000 | No |
| 42835 | RP23-308G10.5 | 0.0000 | No |
| 42836 | RP23-308N3.3  | 0.0000 | No |
| 42837 | RP23-308N3.4  | 0.0000 | No |
| 42838 | RP23-308N3.5  | 0.0000 | No |
| 42839 | RP23-308N3.6  | 0.0000 | No |
| 42840 | RP23-308N3.7  | 0.0000 | No |
| 42841 | RP23-308N3.8  | 0.0000 | No |
| 42842 | RP23-309H21.1 | 0.0000 | No |
| 42843 | RP23-311A1.1  | 0.0000 | No |
| 42844 | RP23-311F6.7  | 0.0000 | No |
| 42845 | RP23-312A24.1 | 0.0000 | No |
| 42846 | RP23-312A24.2 | 0.0000 | No |
| 42847 | RP23-312A24.3 | 0.0000 | No |
| 42848 | RP23-312B17.1 | 0.0000 | No |
| 42849 | RP23-312B17.2 | 0.0000 | No |
| 42850 | RP23-312B17.3 | 0.0000 | No |
| 42851 | RP23-312J21.2 | 0.0000 | No |
| 42852 | RP23-313P23.4 | 0.0000 | No |
| 42853 | RP23-314A15.5 | 0.0000 | No |
| 42854 | RP23-314A15.6 | 0.0000 | No |
| 42855 | RP23-314A15.7 | 0.0000 | No |
| 42856 | RP23-314A15.8 | 0.0000 | No |
| 42857 | RP23-314E23.2 | 0.0000 | No |
| 42858 | RP23-316O20.1 | 0.0000 | No |
| 42859 | RP23-320D23.6 | 0.0000 | No |
| 42860 | RP23-323L3.1  | 0.0000 | No |
| 42861 | RP23-323P3.1  | 0.0000 | No |
| 42862 | RP23-324B16.3 | 0.0000 | No |
| 42863 | RP23-324J18.1 | 0.0000 | No |
| 42864 | RP23-324J18.2 | 0.0000 | No |
| 42865 | RP23-325D10.3 | 0.0000 | No |
| 42866 | RP23-325P15.2 | 0.0000 | No |
| 42867 | RP23-329B5.2  | 0.0000 | No |
| 42868 | RP23-32L24.1  | 0.0000 | No |
| 42869 | RP23-330G24.3 | 0.0000 | No |

|       |                |        |    |
|-------|----------------|--------|----|
| 42870 | RP23-331E5.10  | 0.0000 | No |
| 42871 | RP23-331E5.11  | 0.0000 | No |
| 42872 | RP23-331E5.5   | 0.0000 | No |
| 42873 | RP23-331E5.8   | 0.0000 | No |
| 42874 | RP23-331E5.9   | 0.0000 | No |
| 42875 | RP23-331I13.1  | 0.0000 | No |
| 42876 | RP23-337J18.2  | 0.0000 | No |
| 42877 | RP23-337L12.6  | 0.0000 | No |
| 42878 | RP23-338G21.3  | 0.0000 | No |
| 42879 | RP23-33B7.2    | 0.0000 | No |
| 42880 | RP23-33N12.2   | 0.0000 | No |
| 42881 | RP23-340D4.2   | 0.0000 | No |
| 42882 | RP23-340G24.10 | 0.0000 | No |
| 42883 | RP23-340G24.11 | 0.0000 | No |
| 42884 | RP23-340G24.12 | 0.0000 | No |
| 42885 | RP23-340G24.5  | 0.0000 | No |
| 42886 | RP23-340G24.6  | 0.0000 | No |
| 42887 | RP23-340G24.8  | 0.0000 | No |
| 42888 | RP23-341N20.1  | 0.0000 | No |
| 42889 | RP23-342N3.1   | 0.0000 | No |
| 42890 | RP23-342N3.2   | 0.0000 | No |
| 42891 | RP23-345H24.4  | 0.0000 | No |
| 42892 | RP23-346G14.2  | 0.0000 | No |
| 42893 | RP23-346G14.3  | 0.0000 | No |
| 42894 | RP23-346N11.5  | 0.0000 | No |
| 42895 | RP23-346N11.6  | 0.0000 | No |
| 42896 | RP23-346N8.3   | 0.0000 | No |
| 42897 | RP23-348B21.1  | 0.0000 | No |
| 42898 | RP23-348E10.2  | 0.0000 | No |
| 42899 | RP23-348F1.1   | 0.0000 | No |
| 42900 | RP23-34J1.5    | 0.0000 | No |
| 42901 | RP23-350F7.1   | 0.0000 | No |
| 42902 | RP23-350F7.3   | 0.0000 | No |
| 42903 | RP23-350F7.6   | 0.0000 | No |
| 42904 | RP23-350M23.3  | 0.0000 | No |
| 42905 | RP23-350M23.5  | 0.0000 | No |
| 42906 | RP23-350M23.7  | 0.0000 | No |
| 42907 | RP23-352M7.2   | 0.0000 | No |
| 42908 | RP23-353K11.5  | 0.0000 | No |
| 42909 | RP23-354I24.7  | 0.0000 | No |
| 42910 | RP23-354J5.3   | 0.0000 | No |
| 42911 | RP23-355E19.1  | 0.0000 | No |
| 42912 | RP23-356D13.10 | 0.0000 | No |
| 42913 | RP23-356D13.11 | 0.0000 | No |
| 42914 | RP23-356D13.12 | 0.0000 | No |
| 42915 | RP23-356D13.5  | 0.0000 | No |

|       |                |        |    |
|-------|----------------|--------|----|
| 42916 | RP23-356D13.6  | 0.0000 | No |
| 42917 | RP23-356D13.8  | 0.0000 | No |
| 42918 | RP23-356D13.9  | 0.0000 | No |
| 42919 | RP23-356I16.2  | 0.0000 | No |
| 42920 | RP23-357B4.1   | 0.0000 | No |
| 42921 | RP23-357B4.2   | 0.0000 | No |
| 42922 | RP23-357O17.2  | 0.0000 | No |
| 42923 | RP23-358C4.1   | 0.0000 | No |
| 42924 | RP23-358C4.2   | 0.0000 | No |
| 42925 | RP23-358C4.3   | 0.0000 | No |
| 42926 | RP23-359B23.13 | 0.0000 | No |
| 42927 | RP23-359F16.1  | 0.0000 | No |
| 42928 | RP23-35N23.1   | 0.0000 | No |
| 42929 | RP23-35O24.3   | 0.0000 | No |
| 42930 | RP23-360L22.2  | 0.0000 | No |
| 42931 | RP23-361B11.1  | 0.0000 | No |
| 42932 | RP23-361K13.1  | 0.0000 | No |
| 42933 | RP23-363G20.1  | 0.0000 | No |
| 42934 | RP23-363G20.2  | 0.0000 | No |
| 42935 | RP23-364M19.1  | 0.0000 | No |
| 42936 | RP23-366E1.3   | 0.0000 | No |
| 42937 | RP23-366E1.5   | 0.0000 | No |
| 42938 | RP23-366E4.2   | 0.0000 | No |
| 42939 | RP23-366E4.8   | 0.0000 | No |
| 42940 | RP23-366E4.9   | 0.0000 | No |
| 42941 | RP23-366K1.6   | 0.0000 | No |
| 42942 | RP23-368K22.5  | 0.0000 | No |
| 42943 | RP23-36B4.2    | 0.0000 | No |
| 42944 | RP23-371B13.5  | 0.0000 | No |
| 42945 | RP23-371K6.1   | 0.0000 | No |
| 42946 | RP23-373D18.1  | 0.0000 | No |
| 42947 | RP23-373F11.1  | 0.0000 | No |
| 42948 | RP23-374L19.1  | 0.0000 | No |
| 42949 | RP23-377C12.4  | 0.0000 | No |
| 42950 | RP23-378O9.1   | 0.0000 | No |
| 42951 | RP23-378O9.2   | 0.0000 | No |
| 42952 | RP23-37D14.3   | 0.0000 | No |
| 42953 | RP23-37D14.4   | 0.0000 | No |
| 42954 | RP23-37D14.5   | 0.0000 | No |
| 42955 | RP23-37D14.7   | 0.0000 | No |
| 42956 | RP23-380A10.8  | 0.0000 | No |
| 42957 | RP23-381H23.2  | 0.0000 | No |
| 42958 | RP23-381H23.3  | 0.0000 | No |
| 42959 | RP23-381I17.2  | 0.0000 | No |
| 42960 | RP23-381I17.3  | 0.0000 | No |
| 42961 | RP23-381I17.5  | 0.0000 | No |

|       |                |        |    |
|-------|----------------|--------|----|
| 42962 | RP23-382B3.1   | 0.0000 | No |
| 42963 | RP23-382B3.2   | 0.0000 | No |
| 42964 | RP23-383B20.1  | 0.0000 | No |
| 42965 | RP23-384L16.16 | 0.0000 | No |
| 42966 | RP23-389O20.6  | 0.0000 | No |
| 42967 | RP23-38P22.1   | 0.0000 | No |
| 42968 | RP23-38P22.2   | 0.0000 | No |
| 42969 | RP23-390K13.4  | 0.0000 | No |
| 42970 | RP23-390K13.5  | 0.0000 | No |
| 42971 | RP23-390K13.6  | 0.0000 | No |
| 42972 | RP23-390K13.7  | 0.0000 | No |
| 42973 | RP23-392I13.13 | 0.0000 | No |
| 42974 | RP23-392I13.15 | 0.0000 | No |
| 42975 | RP23-395M5.5   | 0.0000 | No |
| 42976 | RP23-395M5.6   | 0.0000 | No |
| 42977 | RP23-395M5.7   | 0.0000 | No |
| 42978 | RP23-395M5.8   | 0.0000 | No |
| 42979 | RP23-396C4.1   | 0.0000 | No |
| 42980 | RP23-396N20.1  | 0.0000 | No |
| 42981 | RP23-399J5.1   | 0.0000 | No |
| 42982 | RP23-399J5.2   | 0.0000 | No |
| 42983 | RP23-39F24.1   | 0.0000 | No |
| 42984 | RP23-39F24.3   | 0.0000 | No |
| 42985 | RP23-3F1.6     | 0.0000 | No |
| 42986 | RP23-3F1.8     | 0.0000 | No |
| 42987 | RP23-400E10.3  | 0.0000 | No |
| 42988 | RP23-400F19.1  | 0.0000 | No |
| 42989 | RP23-400F19.3  | 0.0000 | No |
| 42990 | RP23-400G18.1  | 0.0000 | No |
| 42991 | RP23-400N18.2  | 0.0000 | No |
| 42992 | RP23-400N18.3  | 0.0000 | No |
| 42993 | RP23-401L9.4   | 0.0000 | No |
| 42994 | RP23-401L9.5   | 0.0000 | No |
| 42995 | RP23-402F24.3  | 0.0000 | No |
| 42996 | RP23-402F24.5  | 0.0000 | No |
| 42997 | RP23-402O17.1  | 0.0000 | No |
| 42998 | RP23-403D16.3  | 0.0000 | No |
| 42999 | RP23-403G9.6   | 0.0000 | No |
| 43000 | RP23-403G9.9   | 0.0000 | No |
| 43001 | RP23-403I3.7   | 0.0000 | No |
| 43002 | RP23-405I13.1  | 0.0000 | No |
| 43003 | RP23-408J7.1   | 0.0000 | No |
| 43004 | RP23-408J7.2   | 0.0000 | No |
| 43005 | RP23-408K7.1   | 0.0000 | No |
| 43006 | RP23-408K7.2   | 0.0000 | No |
| 43007 | RP23-40D21.1   | 0.0000 | No |

|       |                |        |    |
|-------|----------------|--------|----|
| 43008 | RP23-40D21.3   | 0.0000 | No |
| 43009 | RP23-410B24.4  | 0.0000 | No |
| 43010 | RP23-410B24.5  | 0.0000 | No |
| 43011 | RP23-410L16.1  | 0.0000 | No |
| 43012 | RP23-410L16.3  | 0.0000 | No |
| 43013 | RP23-410L16.4  | 0.0000 | No |
| 43014 | RP23-410L16.5  | 0.0000 | No |
| 43015 | RP23-410L16.8  | 0.0000 | No |
| 43016 | RP23-411I6.1   | 0.0000 | No |
| 43017 | RP23-412P4.2   | 0.0000 | No |
| 43018 | RP23-415J15.3  | 0.0000 | No |
| 43019 | RP23-416I23.6  | 0.0000 | No |
| 43020 | RP23-416I23.9  | 0.0000 | No |
| 43021 | RP23-417K23.1  | 0.0000 | No |
| 43022 | RP23-417K23.2  | 0.0000 | No |
| 43023 | RP23-417K23.4  | 0.0000 | No |
| 43024 | RP23-418A13.5  | 0.0000 | No |
| 43025 | RP23-419G4.1   | 0.0000 | No |
| 43026 | RP23-419K14.11 | 0.0000 | No |
| 43027 | RP23-41B18.5   | 0.0000 | No |
| 43028 | RP23-421M6.1   | 0.0000 | No |
| 43029 | RP23-421M6.2   | 0.0000 | No |
| 43030 | RP23-421M6.3   | 0.0000 | No |
| 43031 | RP23-421N20.4  | 0.0000 | No |
| 43032 | RP23-423B21.1  | 0.0000 | No |
| 43033 | RP23-423B21.6  | 0.0000 | No |
| 43034 | RP23-424A21.4  | 0.0000 | No |
| 43035 | RP23-424A21.5  | 0.0000 | No |
| 43036 | RP23-424C4.7   | 0.0000 | No |
| 43037 | RP23-424C4.8   | 0.0000 | No |
| 43038 | RP23-425M11.1  | 0.0000 | No |
| 43039 | RP23-426E11.3  | 0.0000 | No |
| 43040 | RP23-426K2.2   | 0.0000 | No |
| 43041 | RP23-426K2.3   | 0.0000 | No |
| 43042 | RP23-428I4.3   | 0.0000 | No |
| 43043 | RP23-42E3.1    | 0.0000 | No |
| 43044 | RP23-42N8.2    | 0.0000 | No |
| 43045 | RP23-430K5.3   | 0.0000 | No |
| 43046 | RP23-430O20.13 | 0.0000 | No |
| 43047 | RP23-431B6.1   | 0.0000 | No |
| 43048 | RP23-431G3.3   | 0.0000 | No |
| 43049 | RP23-431O7.10  | 0.0000 | No |
| 43050 | RP23-431O7.3   | 0.0000 | No |
| 43051 | RP23-431O7.6   | 0.0000 | No |
| 43052 | RP23-431O7.8   | 0.0000 | No |
| 43053 | RP23-431O7.9   | 0.0000 | No |



|       |                |        |    |
|-------|----------------|--------|----|
| 43054 | RP23-432C4.2   | 0.0000 | No |
| 43055 | RP23-433B2.5   | 0.0000 | No |
| 43056 | RP23-433B2.6   | 0.0000 | No |
| 43057 | RP23-433B2.9   | 0.0000 | No |
| 43058 | RP23-433C10.1  | 0.0000 | No |
| 43059 | RP23-433C10.2  | 0.0000 | No |
| 43060 | RP23-433H22.2  | 0.0000 | No |
| 43061 | RP23-433H22.3  | 0.0000 | No |
| 43062 | RP23-433M13.5  | 0.0000 | No |
| 43063 | RP23-434H18.1  | 0.0000 | No |
| 43064 | RP23-438P19.11 | 0.0000 | No |
| 43065 | RP23-438P19.12 | 0.0000 | No |
| 43066 | RP23-438P19.13 | 0.0000 | No |
| 43067 | RP23-438P19.7  | 0.0000 | No |
| 43068 | RP23-440F7.2   | 0.0000 | No |
| 43069 | RP23-440F7.5   | 0.0000 | No |
| 43070 | RP23-440L7.5   | 0.0000 | No |
| 43071 | RP23-442A13.3  | 0.0000 | No |
| 43072 | RP23-442A13.4  | 0.0000 | No |
| 43073 | RP23-442M18.4  | 0.0000 | No |
| 43074 | RP23-442M18.7  | 0.0000 | No |
| 43075 | RP23-442M18.8  | 0.0000 | No |
| 43076 | RP23-442O9.1   | 0.0000 | No |
| 43077 | RP23-444E13.1  | 0.0000 | No |
| 43078 | RP23-444K20.4  | 0.0000 | No |
| 43079 | RP23-444K20.5  | 0.0000 | No |
| 43080 | RP23-447C2.2   | 0.0000 | No |
| 43081 | RP23-449F12.5  | 0.0000 | No |
| 43082 | RP23-449F12.6  | 0.0000 | No |
| 43083 | RP23-449F12.7  | 0.0000 | No |
| 43084 | RP23-449F12.8  | 0.0000 | No |
| 43085 | RP23-449F12.9  | 0.0000 | No |
| 43086 | RP23-449K22.2  | 0.0000 | No |
| 43087 | RP23-44C21.2   | 0.0000 | No |
| 43088 | RP23-44D2.1    | 0.0000 | No |
| 43089 | RP23-451B4.1   | 0.0000 | No |
| 43090 | RP23-451B4.2   | 0.0000 | No |
| 43091 | RP23-451F18.1  | 0.0000 | No |
| 43092 | RP23-451G9.2   | 0.0000 | No |
| 43093 | RP23-451H9.2   | 0.0000 | No |
| 43094 | RP23-453B15.4  | 0.0000 | No |
| 43095 | RP23-453B15.7  | 0.0000 | No |
| 43096 | RP23-453B15.8  | 0.0000 | No |
| 43097 | RP23-453B4.3   | 0.0000 | No |
| 43098 | RP23-456L15.3  | 0.0000 | No |
| 43099 | RP23-457J22.8  | 0.0000 | No |

|       |               |        |    |
|-------|---------------|--------|----|
| 43100 | RP23-459B8.2  | 0.0000 | No |
| 43101 | RP23-462B19.2 | 0.0000 | No |
| 43102 | RP23-462D5.5  | 0.0000 | No |
| 43103 | RP23-463P4.2  | 0.0000 | No |
| 43104 | RP23-465P18.1 | 0.0000 | No |
| 43105 | RP23-466I14.2 | 0.0000 | No |
| 43106 | RP23-467E4.6  | 0.0000 | No |
| 43107 | RP23-467E4.7  | 0.0000 | No |
| 43108 | RP23-468H22.6 | 0.0000 | No |
| 43109 | RP23-468H22.7 | 0.0000 | No |
| 43110 | RP23-470N9.1  | 0.0000 | No |
| 43111 | RP23-471H21.2 | 0.0000 | No |
| 43112 | RP23-477K6.1  | 0.0000 | No |
| 43113 | RP23-477K6.2  | 0.0000 | No |
| 43114 | RP23-478A9.5  | 0.0000 | No |
| 43115 | RP23-478A9.6  | 0.0000 | No |
| 43116 | RP23-478L20.2 | 0.0000 | No |
| 43117 | RP23-478N15.1 | 0.0000 | No |
| 43118 | RP23-478N15.3 | 0.0000 | No |
| 43119 | RP23-478P10.1 | 0.0000 | No |
| 43120 | RP23-478P10.2 | 0.0000 | No |
| 43121 | RP23-478P10.3 | 0.0000 | No |
| 43122 | RP23-479K12.1 | 0.0000 | No |
| 43123 | RP23-479K12.2 | 0.0000 | No |
| 43124 | RP23-47G19.2  | 0.0000 | No |
| 43125 | RP23-47P24.1  | 0.0000 | No |
| 43126 | RP23-48A24.2  | 0.0000 | No |
| 43127 | RP23-48A24.3  | 0.0000 | No |
| 43128 | RP23-4P23.1   | 0.0000 | No |
| 43129 | RP23-50L10.4  | 0.0000 | No |
| 43130 | RP23-50L10.5  | 0.0000 | No |
| 43131 | RP23-53O16.1  | 0.0000 | No |
| 43132 | RP23-53O16.2  | 0.0000 | No |
| 43133 | RP23-53O16.3  | 0.0000 | No |
| 43134 | RP23-54G12.8  | 0.0000 | No |
| 43135 | RP23-54G8.4   | 0.0000 | No |
| 43136 | RP23-55G19.1  | 0.0000 | No |
| 43137 | RP23-55G19.2  | 0.0000 | No |
| 43138 | RP23-55G19.3  | 0.0000 | No |
| 43139 | RP23-56B4.1   | 0.0000 | No |
| 43140 | RP23-57C9.1   | 0.0000 | No |
| 43141 | RP23-58H5.2   | 0.0000 | No |
| 43142 | RP23-58H5.5   | 0.0000 | No |
| 43143 | RP23-58H5.6   | 0.0000 | No |
| 43144 | RP23-58H5.8   | 0.0000 | No |
| 43145 | RP23-58H5.9   | 0.0000 | No |

|       |               |        |    |
|-------|---------------|--------|----|
| 43146 | RP23-58N8.7   | 0.0000 | No |
| 43147 | RP23-59O19.4  | 0.0000 | No |
| 43148 | RP23-5H10.3   | 0.0000 | No |
| 43149 | RP23-5H4.1    | 0.0000 | No |
| 43150 | RP23-5H4.2    | 0.0000 | No |
| 43151 | RP23-5I6.1    | 0.0000 | No |
| 43152 | RP23-60G16.3  | 0.0000 | No |
| 43153 | RP23-60O19.1  | 0.0000 | No |
| 43154 | RP23-60O19.2  | 0.0000 | No |
| 43155 | RP23-60O19.3  | 0.0000 | No |
| 43156 | RP23-60O3.1   | 0.0000 | No |
| 43157 | RP23-60O3.4   | 0.0000 | No |
| 43158 | RP23-60P18.10 | 0.0000 | No |
| 43159 | RP23-60P18.13 | 0.0000 | No |
| 43160 | RP23-61B14.4  | 0.0000 | No |
| 43161 | RP23-62D21.4  | 0.0000 | No |
| 43162 | RP23-62N8.4   | 0.0000 | No |
| 43163 | RP23-62O7.9   | 0.0000 | No |
| 43164 | RP23-63L7.3   | 0.0000 | No |
| 43165 | RP23-65J2.1   | 0.0000 | No |
| 43166 | RP23-65J2.2   | 0.0000 | No |
| 43167 | RP23-68E4.2   | 0.0000 | No |
| 43168 | RP23-68E4.4   | 0.0000 | No |
| 43169 | RP23-69D2.3   | 0.0000 | No |
| 43170 | RP23-69L13.2  | 0.0000 | No |
| 43171 | RP23-69L20.2  | 0.0000 | No |
| 43172 | RP23-6C3.2    | 0.0000 | No |
| 43173 | RP23-6C3.3    | 0.0000 | No |
| 43174 | RP23-6C3.5    | 0.0000 | No |
| 43175 | RP23-72D18.1  | 0.0000 | No |
| 43176 | RP23-72D18.2  | 0.0000 | No |
| 43177 | RP23-74O12.6  | 0.0000 | No |
| 43178 | RP23-74O12.7  | 0.0000 | No |
| 43179 | RP23-78N5.7   | 0.0000 | No |
| 43180 | RP23-79K4.4   | 0.0000 | No |
| 43181 | RP23-80D20.2  | 0.0000 | No |
| 43182 | RP23-80D20.6  | 0.0000 | No |
| 43183 | RP23-80P5.1   | 0.0000 | No |
| 43184 | RP23-80P5.2   | 0.0000 | No |
| 43185 | RP23-80P5.3   | 0.0000 | No |
| 43186 | RP23-81F24.1  | 0.0000 | No |
| 43187 | RP23-82F10.3  | 0.0000 | No |
| 43188 | RP23-82L23.12 | 0.0000 | No |
| 43189 | RP23-82L23.13 | 0.0000 | No |
| 43190 | RP23-82L23.14 | 0.0000 | No |
| 43191 | RP23-82L23.15 | 0.0000 | No |

|       |                |        |    |
|-------|----------------|--------|----|
| 43192 | RP23-83G5.1    | 0.0000 | No |
| 43193 | RP23-83G5.2    | 0.0000 | No |
| 43194 | RP23-83G5.3    | 0.0000 | No |
| 43195 | RP23-88C11.1   | 0.0000 | No |
| 43196 | RP23-88C11.3   | 0.0000 | No |
| 43197 | RP23-88C11.4   | 0.0000 | No |
| 43198 | RP23-88C11.5   | 0.0000 | No |
| 43199 | RP23-88K14.4   | 0.0000 | No |
| 43200 | RP23-88K14.5   | 0.0000 | No |
| 43201 | RP23-88K14.7   | 0.0000 | No |
| 43202 | RP23-8D10.2    | 0.0000 | No |
| 43203 | RP23-8O18.1    | 0.0000 | No |
| 43204 | RP23-91H23.3   | 0.0000 | No |
| 43205 | RP23-92D22.3   | 0.0000 | No |
| 43206 | RP23-92N3.2    | 0.0000 | No |
| 43207 | RP23-92N3.3    | 0.0000 | No |
| 43208 | RP23-93J3.1    | 0.0000 | No |
| 43209 | RP23-94M23.4   | 0.0000 | No |
| 43210 | RP23-98C9.3    | 0.0000 | No |
| 43211 | RP23-98C9.5    | 0.0000 | No |
| 43212 | RP23-98C9.8    | 0.0000 | No |
| 43213 | RP23-98D11.1   | 0.0000 | No |
| 43214 | RP23-99B22.2   | 0.0000 | No |
| 43215 | RP23-99D11.5   | 0.0000 | No |
| 43216 | RP23-99D11.7   | 0.0000 | No |
| 43217 | RP23-99D11.8   | 0.0000 | No |
| 43218 | RP23-99O13.6   | 0.0000 | No |
| 43219 | RP23-9A12.3    | 0.0000 | No |
| 43220 | RP23-9A12.4    | 0.0000 | No |
| 43221 | RP23-9L16.3    | 0.0000 | No |
| 43222 | RP23-9L16.4    | 0.0000 | No |
| 43223 | RP24-112A6.4   | 0.0000 | No |
| 43224 | RP24-114J11.1  | 0.0000 | No |
| 43225 | RP24-115M13.2  | 0.0000 | No |
| 43226 | RP24-116A15.1  | 0.0000 | No |
| 43227 | RP24-116A15.2  | 0.0000 | No |
| 43228 | RP24-116B6.4   | 0.0000 | No |
| 43229 | RP24-118H2.4   | 0.0000 | No |
| 43230 | RP24-120F8.1   | 0.0000 | No |
| 43231 | RP24-121D5.1   | 0.0000 | No |
| 43232 | RP24-121D5.2   | 0.0000 | No |
| 43233 | RP24-122D14.3  | 0.0000 | No |
| 43234 | RP24-125B17.2  | 0.0000 | No |
| 43235 | RP24-129F24.1  | 0.0000 | No |
| 43236 | RP24-131G14.10 | 0.0000 | No |
| 43237 | RP24-131G14.13 | 0.0000 | No |

|       |                |        |    |
|-------|----------------|--------|----|
| 43238 | RP24-131G14.4  | 0.0000 | No |
| 43239 | RP24-131G14.5  | 0.0000 | No |
| 43240 | RP24-132F13.1  | 0.0000 | No |
| 43241 | RP24-134C11.1  | 0.0000 | No |
| 43242 | RP24-134P12.1  | 0.0000 | No |
| 43243 | RP24-134P12.2  | 0.0000 | No |
| 43244 | RP24-135G18.1  | 0.0000 | No |
| 43245 | RP24-142A8.1   | 0.0000 | No |
| 43246 | RP24-142M20.1  | 0.0000 | No |
| 43247 | RP24-143M4.1   | 0.0000 | No |
| 43248 | RP24-143N7.1   | 0.0000 | No |
| 43249 | RP24-147H20.2  | 0.0000 | No |
| 43250 | RP24-147H20.3  | 0.0000 | No |
| 43251 | RP24-148D3.3   | 0.0000 | No |
| 43252 | RP24-152F23.1  | 0.0000 | No |
| 43253 | RP24-152F23.2  | 0.0000 | No |
| 43254 | RP24-152F23.5  | 0.0000 | No |
| 43255 | RP24-153A6.1   | 0.0000 | No |
| 43256 | RP24-156P7.2   | 0.0000 | No |
| 43257 | RP24-158M8.2   | 0.0000 | No |
| 43258 | RP24-161A21.2  | 0.0000 | No |
| 43259 | RP24-161A21.3  | 0.0000 | No |
| 43260 | RP24-161L16.3  | 0.0000 | No |
| 43261 | RP24-163M14.1  | 0.0000 | No |
| 43262 | RP24-164A20.1  | 0.0000 | No |
| 43263 | RP24-165I13.1  | 0.0000 | No |
| 43264 | RP24-166B2.5   | 0.0000 | No |
| 43265 | RP24-167A12.2  | 0.0000 | No |
| 43266 | RP24-167A12.4  | 0.0000 | No |
| 43267 | RP24-167A12.6  | 0.0000 | No |
| 43268 | RP24-167L2.1   | 0.0000 | No |
| 43269 | RP24-168N14.4  | 0.0000 | No |
| 43270 | RP24-170A20.6  | 0.0000 | No |
| 43271 | RP24-170O17.2  | 0.0000 | No |
| 43272 | RP24-174I18.3  | 0.0000 | No |
| 43273 | RP24-174I18.4  | 0.0000 | No |
| 43274 | RP24-174I4.1   | 0.0000 | No |
| 43275 | RP24-174I4.2   | 0.0000 | No |
| 43276 | RP24-174O15.3  | 0.0000 | No |
| 43277 | RP24-174O15.4  | 0.0000 | No |
| 43278 | RP24-175C20.10 | 0.0000 | No |
| 43279 | RP24-175C20.15 | 0.0000 | No |
| 43280 | RP24-175C20.18 | 0.0000 | No |
| 43281 | RP24-175C20.19 | 0.0000 | No |
| 43282 | RP24-175C20.5  | 0.0000 | No |
| 43283 | RP24-176A1.1   | 0.0000 | No |

|       |                |        |    |
|-------|----------------|--------|----|
| 43284 | RP24-176A1.2   | 0.0000 | No |
| 43285 | RP24-178D16.2  | 0.0000 | No |
| 43286 | RP24-178J22.1  | 0.0000 | No |
| 43287 | RP24-178J22.3  | 0.0000 | No |
| 43288 | RP24-178J22.4  | 0.0000 | No |
| 43289 | RP24-185I21.1  | 0.0000 | No |
| 43290 | RP24-185I21.2  | 0.0000 | No |
| 43291 | RP24-189I2.4   | 0.0000 | No |
| 43292 | RP24-189I2.5   | 0.0000 | No |
| 43293 | RP24-198J23.1  | 0.0000 | No |
| 43294 | RP24-198N9.1   | 0.0000 | No |
| 43295 | RP24-199D4.1   | 0.0000 | No |
| 43296 | RP24-200K10.1  | 0.0000 | No |
| 43297 | RP24-201N16.3  | 0.0000 | No |
| 43298 | RP24-202N20.1  | 0.0000 | No |
| 43299 | RP24-211L21.1  | 0.0000 | No |
| 43300 | RP24-212B22.3  | 0.0000 | No |
| 43301 | RP24-212B22.4  | 0.0000 | No |
| 43302 | RP24-212B22.6  | 0.0000 | No |
| 43303 | RP24-212I6.2   | 0.0000 | No |
| 43304 | RP24-216E13.1  | 0.0000 | No |
| 43305 | RP24-216M10.1  | 0.0000 | No |
| 43306 | RP24-216P6.3   | 0.0000 | No |
| 43307 | RP24-217M18.3  | 0.0000 | No |
| 43308 | RP24-217M18.8  | 0.0000 | No |
| 43309 | RP24-219A21.3  | 0.0000 | No |
| 43310 | RP24-220H23.2  | 0.0000 | No |
| 43311 | RP24-225E14.11 | 0.0000 | No |
| 43312 | RP24-225H21.2  | 0.0000 | No |
| 43313 | RP24-226H19.1  | 0.0000 | No |
| 43314 | RP24-230F21.2  | 0.0000 | No |
| 43315 | RP24-233B16.1  | 0.0000 | No |
| 43316 | RP24-233B16.4  | 0.0000 | No |
| 43317 | RP24-233B16.6  | 0.0000 | No |
| 43318 | RP24-233B16.8  | 0.0000 | No |
| 43319 | RP24-233F22.3  | 0.0000 | No |
| 43320 | RP24-235C16.1  | 0.0000 | No |
| 43321 | RP24-235C16.5  | 0.0000 | No |
| 43322 | RP24-236E2.1   | 0.0000 | No |
| 43323 | RP24-236E2.2   | 0.0000 | No |
| 43324 | RP24-236E2.3   | 0.0000 | No |
| 43325 | RP24-238M4.2   | 0.0000 | No |
| 43326 | RP24-238M4.4   | 0.0000 | No |
| 43327 | RP24-240O5.1   | 0.0000 | No |
| 43328 | RP24-243J4.5   | 0.0000 | No |
| 43329 | RP24-245G1.1   | 0.0000 | No |

|       |               |        |    |
|-------|---------------|--------|----|
| 43330 | RP24-246F10.3 | 0.0000 | No |
| 43331 | RP24-246F10.4 | 0.0000 | No |
| 43332 | RP24-246F10.5 | 0.0000 | No |
| 43333 | RP24-246F6.2  | 0.0000 | No |
| 43334 | RP24-247A8.5  | 0.0000 | No |
| 43335 | RP24-247A8.7  | 0.0000 | No |
| 43336 | RP24-247A8.8  | 0.0000 | No |
| 43337 | RP24-247B20.2 | 0.0000 | No |
| 43338 | RP24-248F14.2 | 0.0000 | No |
| 43339 | RP24-251K18.1 | 0.0000 | No |
| 43340 | RP24-251M20.1 | 0.0000 | No |
| 43341 | RP24-252B21.3 | 0.0000 | No |
| 43342 | RP24-252K15.3 | 0.0000 | No |
| 43343 | RP24-252K15.4 | 0.0000 | No |
| 43344 | RP24-254A5.3  | 0.0000 | No |
| 43345 | RP24-254O21.2 | 0.0000 | No |
| 43346 | RP24-254O21.3 | 0.0000 | No |
| 43347 | RP24-257F22.2 | 0.0000 | No |
| 43348 | RP24-257F22.3 | 0.0000 | No |
| 43349 | RP24-257F22.4 | 0.0000 | No |
| 43350 | RP24-259F2.1  | 0.0000 | No |
| 43351 | RP24-260O23.1 | 0.0000 | No |
| 43352 | RP24-261D2.1  | 0.0000 | No |
| 43353 | RP24-262P14.2 | 0.0000 | No |
| 43354 | RP24-262P14.3 | 0.0000 | No |
| 43355 | RP24-263E2.2  | 0.0000 | No |
| 43356 | RP24-263E2.3  | 0.0000 | No |
| 43357 | RP24-264F17.3 | 0.0000 | No |
| 43358 | RP24-264F17.4 | 0.0000 | No |
| 43359 | RP24-264F17.5 | 0.0000 | No |
| 43360 | RP24-264F17.6 | 0.0000 | No |
| 43361 | RP24-266N21.3 | 0.0000 | No |
| 43362 | RP24-269A16.7 | 0.0000 | No |
| 43363 | RP24-271G1.1  | 0.0000 | No |
| 43364 | RP24-271G1.2  | 0.0000 | No |
| 43365 | RP24-274B19.1 | 0.0000 | No |
| 43366 | RP24-274B19.2 | 0.0000 | No |
| 43367 | RP24-275P22.1 | 0.0000 | No |
| 43368 | RP24-275P22.2 | 0.0000 | No |
| 43369 | RP24-275P22.3 | 0.0000 | No |
| 43370 | RP24-276H6.2  | 0.0000 | No |
| 43371 | RP24-278L20.1 | 0.0000 | No |
| 43372 | RP24-278L20.2 | 0.0000 | No |
| 43373 | RP24-279F18.1 | 0.0000 | No |
| 43374 | RP24-282C4.10 | 0.0000 | No |
| 43375 | RP24-282C4.12 | 0.0000 | No |

|       |                |        |    |
|-------|----------------|--------|----|
| 43376 | RP24-282C4.13  | 0.0000 | No |
| 43377 | RP24-282C4.14  | 0.0000 | No |
| 43378 | RP24-282C4.3   | 0.0000 | No |
| 43379 | RP24-282C4.4   | 0.0000 | No |
| 43380 | RP24-282C4.5   | 0.0000 | No |
| 43381 | RP24-282C4.6   | 0.0000 | No |
| 43382 | RP24-282C4.9   | 0.0000 | No |
| 43383 | RP24-283E13.1  | 0.0000 | No |
| 43384 | RP24-286B23.1  | 0.0000 | No |
| 43385 | RP24-286J14.2  | 0.0000 | No |
| 43386 | RP24-286J14.3  | 0.0000 | No |
| 43387 | RP24-286J21.7  | 0.0000 | No |
| 43388 | RP24-290D19.6  | 0.0000 | No |
| 43389 | RP24-291F20.1  | 0.0000 | No |
| 43390 | RP24-292K6.1   | 0.0000 | No |
| 43391 | RP24-292O2.2   | 0.0000 | No |
| 43392 | RP24-294A16.4  | 0.0000 | No |
| 43393 | RP24-295B16.1  | 0.0000 | No |
| 43394 | RP24-295J1.1   | 0.0000 | No |
| 43395 | RP24-296C19.4  | 0.0000 | No |
| 43396 | RP24-296K18.5  | 0.0000 | No |
| 43397 | RP24-296K18.6  | 0.0000 | No |
| 43398 | RP24-298N7.10  | 0.0000 | No |
| 43399 | RP24-300B21.2  | 0.0000 | No |
| 43400 | RP24-301O17.2  | 0.0000 | No |
| 43401 | RP24-302M13.5  | 0.0000 | No |
| 43402 | RP24-302M3.5   | 0.0000 | No |
| 43403 | RP24-308P8.1   | 0.0000 | No |
| 43404 | RP24-308P8.2   | 0.0000 | No |
| 43405 | RP24-315I19.1  | 0.0000 | No |
| 43406 | RP24-315I19.2  | 0.0000 | No |
| 43407 | RP24-316B2.1   | 0.0000 | No |
| 43408 | RP24-316B2.2   | 0.0000 | No |
| 43409 | RP24-316B2.3   | 0.0000 | No |
| 43410 | RP24-316F13.7  | 0.0000 | No |
| 43411 | RP24-318O6.3   | 0.0000 | No |
| 43412 | RP24-324J2.2   | 0.0000 | No |
| 43413 | RP24-325F22.1  | 0.0000 | No |
| 43414 | RP24-325N9.2   | 0.0000 | No |
| 43415 | RP24-325N9.3   | 0.0000 | No |
| 43416 | RP24-325N9.4   | 0.0000 | No |
| 43417 | RP24-325N9.5   | 0.0000 | No |
| 43418 | RP24-325P4.4   | 0.0000 | No |
| 43419 | RP24-325P4.5   | 0.0000 | No |
| 43420 | RP24-328K10.1  | 0.0000 | No |
| 43421 | RP24-329C11.11 | 0.0000 | No |



|       |               |        |    |
|-------|---------------|--------|----|
| 43422 | RP24-330D16.1 | 0.0000 | No |
| 43423 | RP24-335A22.6 | 0.0000 | No |
| 43424 | RP24-335I20.1 | 0.0000 | No |
| 43425 | RP24-340L11.5 | 0.0000 | No |
| 43426 | RP24-340L11.6 | 0.0000 | No |
| 43427 | RP24-343C11.1 | 0.0000 | No |
| 43428 | RP24-343G19.3 | 0.0000 | No |
| 43429 | RP24-343P7.1  | 0.0000 | No |
| 43430 | RP24-344C7.3  | 0.0000 | No |
| 43431 | RP24-344D19.3 | 0.0000 | No |
| 43432 | RP24-344D19.4 | 0.0000 | No |
| 43433 | RP24-344F2.1  | 0.0000 | No |
| 43434 | RP24-345M16.2 | 0.0000 | No |
| 43435 | RP24-345M16.5 | 0.0000 | No |
| 43436 | RP24-345M22.1 | 0.0000 | No |
| 43437 | RP24-345M22.2 | 0.0000 | No |
| 43438 | RP24-346O11.2 | 0.0000 | No |
| 43439 | RP24-349L11.1 | 0.0000 | No |
| 43440 | RP24-361I17.1 | 0.0000 | No |
| 43441 | RP24-362F17.1 | 0.0000 | No |
| 43442 | RP24-362F17.3 | 0.0000 | No |
| 43443 | RP24-362N13.1 | 0.0000 | No |
| 43444 | RP24-364D22.1 | 0.0000 | No |
| 43445 | RP24-364D22.2 | 0.0000 | No |
| 43446 | RP24-364D22.3 | 0.0000 | No |
| 43447 | RP24-364D22.4 | 0.0000 | No |
| 43448 | RP24-364D22.5 | 0.0000 | No |
| 43449 | RP24-364D22.6 | 0.0000 | No |
| 43450 | RP24-364D22.7 | 0.0000 | No |
| 43451 | RP24-364N7.1  | 0.0000 | No |
| 43452 | RP24-365A12.1 | 0.0000 | No |
| 43453 | RP24-365A12.2 | 0.0000 | No |
| 43454 | RP24-365B9.2  | 0.0000 | No |
| 43455 | RP24-365N15.3 | 0.0000 | No |
| 43456 | RP24-365N15.9 | 0.0000 | No |
| 43457 | RP24-366E11.4 | 0.0000 | No |
| 43458 | RP24-366L10.1 | 0.0000 | No |
| 43459 | RP24-366L10.3 | 0.0000 | No |
| 43460 | RP24-366L10.4 | 0.0000 | No |
| 43461 | RP24-369J8.1  | 0.0000 | No |
| 43462 | RP24-370L8.4  | 0.0000 | No |
| 43463 | RP24-370L8.5  | 0.0000 | No |
| 43464 | RP24-370L8.7  | 0.0000 | No |
| 43465 | RP24-372G15.1 | 0.0000 | No |
| 43466 | RP24-374N16.7 | 0.0000 | No |
| 43467 | RP24-375O19.4 | 0.0000 | No |

|       |               |        |    |
|-------|---------------|--------|----|
| 43468 | RP24-376N22.1 | 0.0000 | No |
| 43469 | RP24-386D3.5  | 0.0000 | No |
| 43470 | RP24-386D3.6  | 0.0000 | No |
| 43471 | RP24-388A6.3  | 0.0000 | No |
| 43472 | RP24-389J11.1 | 0.0000 | No |
| 43473 | RP24-389J11.2 | 0.0000 | No |
| 43474 | RP24-390M17.1 | 0.0000 | No |
| 43475 | RP24-394N21.1 | 0.0000 | No |
| 43476 | RP24-394N21.2 | 0.0000 | No |
| 43477 | RP24-395P13.1 | 0.0000 | No |
| 43478 | RP24-395P13.2 | 0.0000 | No |
| 43479 | RP24-395P13.5 | 0.0000 | No |
| 43480 | RP24-396C10.1 | 0.0000 | No |
| 43481 | RP24-396L14.3 | 0.0000 | No |
| 43482 | RP24-397P9.2  | 0.0000 | No |
| 43483 | RP24-397P9.5  | 0.0000 | No |
| 43484 | RP24-399A15.1 | 0.0000 | No |
| 43485 | RP24-399A15.2 | 0.0000 | No |
| 43486 | RP24-399A15.3 | 0.0000 | No |
| 43487 | RP24-399A15.5 | 0.0000 | No |
| 43488 | RP24-401C17.6 | 0.0000 | No |
| 43489 | RP24-402O2.2  | 0.0000 | No |
| 43490 | RP24-409P7.1  | 0.0000 | No |
| 43491 | RP24-409P7.2  | 0.0000 | No |
| 43492 | RP24-410B18.1 | 0.0000 | No |
| 43493 | RP24-410B18.2 | 0.0000 | No |
| 43494 | RP24-410B18.3 | 0.0000 | No |
| 43495 | RP24-410B18.4 | 0.0000 | No |
| 43496 | RP24-410B18.5 | 0.0000 | No |
| 43497 | RP24-414A22.9 | 0.0000 | No |
| 43498 | RP24-418L21.3 | 0.0000 | No |
| 43499 | RP24-418N13.2 | 0.0000 | No |
| 43500 | RP24-418N13.4 | 0.0000 | No |
| 43501 | RP24-420C18.1 | 0.0000 | No |
| 43502 | RP24-420C18.2 | 0.0000 | No |
| 43503 | RP24-421B13.1 | 0.0000 | No |
| 43504 | RP24-421D3.1  | 0.0000 | No |
| 43505 | RP24-421G4.2  | 0.0000 | No |
| 43506 | RP24-421P3.9  | 0.0000 | No |
| 43507 | RP24-423G4.1  | 0.0000 | No |
| 43508 | RP24-425L9.1  | 0.0000 | No |
| 43509 | RP24-425L9.2  | 0.0000 | No |
| 43510 | RP24-427O13.1 | 0.0000 | No |
| 43511 | RP24-444M16.3 | 0.0000 | No |
| 43512 | RP24-446P15.4 | 0.0000 | No |
| 43513 | RP24-457L7.3  | 0.0000 | No |

|       |                |        |    |
|-------|----------------|--------|----|
| 43514 | RP24-462O14.2  | 0.0000 | No |
| 43515 | RP24-464B16.1  | 0.0000 | No |
| 43516 | RP24-465F1.1   | 0.0000 | No |
| 43517 | RP24-470M22.10 | 0.0000 | No |
| 43518 | RP24-473A18.3  | 0.0000 | No |
| 43519 | RP24-473A18.4  | 0.0000 | No |
| 43520 | RP24-473C10.1  | 0.0000 | No |
| 43521 | RP24-477I13.1  | 0.0000 | No |
| 43522 | RP24-488E11.3  | 0.0000 | No |
| 43523 | RP24-489N16.1  | 0.0000 | No |
| 43524 | RP24-492I15.1  | 0.0000 | No |
| 43525 | RP24-496O17.7  | 0.0000 | No |
| 43526 | RP24-496O17.9  | 0.0000 | No |
| 43527 | RP24-497E22.1  | 0.0000 | No |
| 43528 | RP24-497N7.1   | 0.0000 | No |
| 43529 | RP24-497N7.2   | 0.0000 | No |
| 43530 | RP24-499N24.4  | 0.0000 | No |
| 43531 | RP24-499N24.5  | 0.0000 | No |
| 43532 | RP24-501O22.3  | 0.0000 | No |
| 43533 | RP24-502B21.1  | 0.0000 | No |
| 43534 | RP24-502J3.1   | 0.0000 | No |
| 43535 | RP24-505E20.1  | 0.0000 | No |
| 43536 | RP24-511A23.3  | 0.0000 | No |
| 43537 | RP24-511J14.2  | 0.0000 | No |
| 43538 | RP24-531B21.2  | 0.0000 | No |
| 43539 | RP24-531B21.3  | 0.0000 | No |
| 43540 | RP24-531B21.4  | 0.0000 | No |
| 43541 | RP24-531B21.5  | 0.0000 | No |
| 43542 | RP24-532D12.5  | 0.0000 | No |
| 43543 | RP24-532P18.1  | 0.0000 | No |
| 43544 | RP24-538A12.2  | 0.0000 | No |
| 43545 | RP24-538A12.3  | 0.0000 | No |
| 43546 | RP24-541B4.5   | 0.0000 | No |
| 43547 | RP24-553E23.6  | 0.0000 | No |
| 43548 | RP24-553E23.7  | 0.0000 | No |
| 43549 | RP24-553E23.8  | 0.0000 | No |
| 43550 | RP24-553O21.4  | 0.0000 | No |
| 43551 | RP24-570C10.8  | 0.0000 | No |
| 43552 | RP24-571A14.6  | 0.0000 | No |
| 43553 | RP24-571H12.4  | 0.0000 | No |
| 43554 | RP24-571H12.6  | 0.0000 | No |
| 43555 | RP24-572J16.1  | 0.0000 | No |
| 43556 | RP24-63G4.14   | 0.0000 | No |
| 43557 | RP24-63G9.4    | 0.0000 | No |
| 43558 | RP24-63K13.2   | 0.0000 | No |
| 43559 | RP24-63K13.4   | 0.0000 | No |

|       |               |        |    |
|-------|---------------|--------|----|
| 43560 | RP24-67M24.3  | 0.0000 | No |
| 43561 | RP24-68M15.1  | 0.0000 | No |
| 43562 | RP24-70C15.3  | 0.0000 | No |
| 43563 | RP24-70C15.4  | 0.0000 | No |
| 43564 | RP24-70H20.4  | 0.0000 | No |
| 43565 | RP24-70H20.5  | 0.0000 | No |
| 43566 | RP24-74P1.1   | 0.0000 | No |
| 43567 | RP24-75M13.1  | 0.0000 | No |
| 43568 | RP24-75M13.2  | 0.0000 | No |
| 43569 | RP24-76M8.3   | 0.0000 | No |
| 43570 | RP24-76M8.4   | 0.0000 | No |
| 43571 | RP24-77E13.12 | 0.0000 | No |
| 43572 | RP24-77I7.2   | 0.0000 | No |
| 43573 | RP24-79I19.5  | 0.0000 | No |
| 43574 | RP24-79I19.6  | 0.0000 | No |
| 43575 | RP24-80J11.2  | 0.0000 | No |
| 43576 | RP24-81G20.2  | 0.0000 | No |
| 43577 | RP24-82E11.2  | 0.0000 | No |
| 43578 | RP24-84C23.4  | 0.0000 | No |
| 43579 | RP24-84C23.5  | 0.0000 | No |
| 43580 | RP24-84C23.6  | 0.0000 | No |
| 43581 | RP24-84H10.14 | 0.0000 | No |
| 43582 | RP24-84H10.9  | 0.0000 | No |
| 43583 | RP24-86H17.1  | 0.0000 | No |
| 43584 | RP24-86H17.2  | 0.0000 | No |
| 43585 | RP24-86H17.3  | 0.0000 | No |
| 43586 | RP24-86H7.3   | 0.0000 | No |
| 43587 | RP24-86L13.2  | 0.0000 | No |
| 43588 | RP24-87F18.1  | 0.0000 | No |
| 43589 | RP24-87F18.2  | 0.0000 | No |
| 43590 | RP24-87K15.4  | 0.0000 | No |
| 43591 | RP24-87K15.6  | 0.0000 | No |
| 43592 | RP24-87K15.7  | 0.0000 | No |
| 43593 | RP24-87K15.8  | 0.0000 | No |
| 43594 | RP24-88B13.8  | 0.0000 | No |
| 43595 | RP24-89C4.4   | 0.0000 | No |
| 43596 | RP24-89C4.5   | 0.0000 | No |
| 43597 | RP24-89M13.2  | 0.0000 | No |
| 43598 | RP24-93F18.2  | 0.0000 | No |
| 43599 | RP24-93F18.4  | 0.0000 | No |
| 43600 | RP24-93F20.11 | 0.0000 | No |
| 43601 | RP24-93F20.12 | 0.0000 | No |
| 43602 | RP24-93F20.6  | 0.0000 | No |
| 43603 | RP24-93F20.9  | 0.0000 | No |
| 43604 | RP24-94A19.4  | 0.0000 | No |
| 43605 | RP24-94F12.2  | 0.0000 | No |

|       |              |        |    |
|-------|--------------|--------|----|
| 43606 | RP24-94F12.4 | 0.0000 | No |
| 43607 | RP24-94F12.6 | 0.0000 | No |
| 43608 | RP24-95N16.3 | 0.0000 | No |
| 43609 | RP24-95O4.1  | 0.0000 | No |
| 43610 | RP24-95O4.2  | 0.0000 | No |
| 43611 | RP24-95O4.3  | 0.0000 | No |
| 43612 | RP24-95O4.4  | 0.0000 | No |
| 43613 | RP24-95O4.5  | 0.0000 | No |
| 43614 | RP24-95O4.6  | 0.0000 | No |
| 43615 | RP24-95O4.7  | 0.0000 | No |
| 43616 | RP24-95O4.9  | 0.0000 | No |
| 43617 | RP24-97K3.3  | 0.0000 | No |
| 43618 | RP24-97K3.4  | 0.0000 | No |
| 43619 | Rp31-ps19    | 0.0000 | No |
| 43620 | Rp9          | 0.0000 | No |
| 43621 | Rpa1         | 0.0000 | No |
| 43622 | Rpa2         | 0.0000 | No |
| 43623 | Rpa3         | 0.0000 | No |
| 43624 | Rpain        | 0.0000 | No |
| 43625 | Rpap1        | 0.0000 | No |
| 43626 | Rpap2        | 0.0000 | No |
| 43627 | Rpap3        | 0.0000 | No |
| 43628 | Rpap3-ps1    | 0.0000 | No |
| 43629 | Rpap3-ps2    | 0.0000 | No |
| 43630 | Rpe          | 0.0000 | No |
| 43631 | Rpe65        | 0.0000 | No |
| 43632 | Rpf1         | 0.0000 | No |
| 43633 | Rpf2         | 0.0000 | No |
| 43634 | Rpgr         | 0.0000 | No |
| 43635 | Rpgrip1      | 0.0000 | No |
| 43636 | Rpgrip11     | 0.0000 | No |
| 43637 | Rph3a        | 0.0000 | No |
| 43638 | Rph3al       | 0.0000 | No |
| 43639 | Rpia         | 0.0000 | No |
| 43640 | Rpl10        | 0.0000 | No |
| 43641 | Rpl10a       | 0.0000 | No |
| 43642 | Rpl10a-ps1   | 0.0000 | No |
| 43643 | Rpl10a-ps2   | 0.0000 | No |
| 43644 | Rpl10l       | 0.0000 | No |
| 43645 | Rpl10-ps1    | 0.0000 | No |
| 43646 | Rpl10-ps2    | 0.0000 | No |
| 43647 | Rpl10-ps3    | 0.0000 | No |
| 43648 | Rpl10-ps4    | 0.0000 | No |
| 43649 | Rpl11        | 0.0000 | No |
| 43650 | Rpl12        | 0.0000 | No |
| 43651 | Rpl12-ps1    | 0.0000 | No |

|       |            |        |    |
|-------|------------|--------|----|
| 43652 | Rpl12-ps2  | 0.0000 | No |
| 43653 | Rpl13      | 0.0000 | No |
| 43654 | Rpl13a     | 0.0000 | No |
| 43655 | Rpl13a-ps1 | 0.0000 | No |
| 43656 | Rpl13-ps1  | 0.0000 | No |
| 43657 | Rpl13-ps3  | 0.0000 | No |
| 43658 | Rpl13-ps4  | 0.0000 | No |
| 43659 | Rpl13-ps5  | 0.0000 | No |
| 43660 | Rpl13-ps6  | 0.0000 | No |
| 43661 | Rpl14-ps1  | 0.0000 | No |
| 43662 | Rpl15      | 0.0000 | No |
| 43663 | Rpl15-ps1  | 0.0000 | No |
| 43664 | Rpl15-ps2  | 0.0000 | No |
| 43665 | Rpl15-ps3  | 0.0000 | No |
| 43666 | Rpl15-ps5  | 0.0000 | No |
| 43667 | Rpl17      | 0.0000 | No |
| 43668 | Rpl17-ps10 | 0.0000 | No |
| 43669 | Rpl17-ps11 | 0.0000 | No |
| 43670 | Rpl17-ps4  | 0.0000 | No |
| 43671 | Rpl17-ps5  | 0.0000 | No |
| 43672 | Rpl17-ps8  | 0.0000 | No |
| 43673 | Rpl17-ps9  | 0.0000 | No |
| 43674 | Rpl18      | 0.0000 | No |
| 43675 | Rpl18a     | 0.0000 | No |
| 43676 | Rpl18a-ps1 | 0.0000 | No |
| 43677 | Rpl18a-ps2 | 0.0000 | No |
| 43678 | Rpl18a-ps3 | 0.0000 | No |
| 43679 | Rpl18a-ps4 | 0.0000 | No |
| 43680 | Rpl18-ps1  | 0.0000 | No |
| 43681 | Rpl18-ps2  | 0.0000 | No |
| 43682 | Rpl19      | 0.0000 | No |
| 43683 | Rpl19-ps1  | 0.0000 | No |
| 43684 | Rpl19-ps10 | 0.0000 | No |
| 43685 | Rpl19-ps11 | 0.0000 | No |
| 43686 | Rpl19-ps12 | 0.0000 | No |
| 43687 | Rpl19-ps4  | 0.0000 | No |
| 43688 | Rpl19-ps9  | 0.0000 | No |
| 43689 | Rpl21      | 0.0000 | No |
| 43690 | Rpl21-ps1  | 0.0000 | No |
| 43691 | Rpl21-ps10 | 0.0000 | No |
| 43692 | Rpl21-ps11 | 0.0000 | No |
| 43693 | Rpl21-ps12 | 0.0000 | No |
| 43694 | Rpl21-ps13 | 0.0000 | No |
| 43695 | Rpl21-ps14 | 0.0000 | No |
| 43696 | Rpl21-ps15 | 0.0000 | No |
| 43697 | Rpl21-ps3  | 0.0000 | No |

|       |             |        |    |
|-------|-------------|--------|----|
| 43698 | Rpl21-ps4   | 0.0000 | No |
| 43699 | Rpl21-ps5   | 0.0000 | No |
| 43700 | Rpl21-ps6   | 0.0000 | No |
| 43701 | Rpl21-ps7   | 0.0000 | No |
| 43702 | Rpl21-ps8   | 0.0000 | No |
| 43703 | Rpl21-ps9   | 0.0000 | No |
| 43704 | Rpl22       | 0.0000 | No |
| 43705 | Rpl2211     | 0.0000 | No |
| 43706 | Rpl22-ps1   | 0.0000 | No |
| 43707 | Rpl23       | 0.0000 | No |
| 43708 | Rpl23a      | 0.0000 | No |
| 43709 | Rpl23a-ps1  | 0.0000 | No |
| 43710 | Rpl23a-ps10 | 0.0000 | No |
| 43711 | Rpl23a-ps11 | 0.0000 | No |
| 43712 | Rpl23a-ps12 | 0.0000 | No |
| 43713 | Rpl23a-ps13 | 0.0000 | No |
| 43714 | Rpl23a-ps14 | 0.0000 | No |
| 43715 | Rpl23a-ps2  | 0.0000 | No |
| 43716 | Rpl23a-ps3  | 0.0000 | No |
| 43717 | Rpl23a-ps5  | 0.0000 | No |
| 43718 | Rpl23a-ps7  | 0.0000 | No |
| 43719 | Rpl23a-ps8  | 0.0000 | No |
| 43720 | Rpl23a-ps9  | 0.0000 | No |
| 43721 | Rpl24       | 0.0000 | No |
| 43722 | Rpl26       | 0.0000 | No |
| 43723 | Rpl26-ps3   | 0.0000 | No |
| 43724 | Rpl26-ps4   | 0.0000 | No |
| 43725 | Rpl26-ps5   | 0.0000 | No |
| 43726 | Rpl27a      | 0.0000 | No |
| 43727 | Rpl27a-ps1  | 0.0000 | No |
| 43728 | Rpl27a-ps2  | 0.0000 | No |
| 43729 | Rpl27-ps1   | 0.0000 | No |
| 43730 | Rpl27-ps2   | 0.0000 | No |
| 43731 | Rpl27-ps3   | 0.0000 | No |
| 43732 | Rpl28       | 0.0000 | No |
| 43733 | Rpl28-ps1   | 0.0000 | No |
| 43734 | Rpl28-ps3   | 0.0000 | No |
| 43735 | Rpl29       | 0.0000 | No |
| 43736 | Rpl29-ps1   | 0.0000 | No |
| 43737 | Rpl29-ps2   | 0.0000 | No |
| 43738 | Rpl29-ps5   | 0.0000 | No |
| 43739 | Rpl3        | 0.0000 | No |
| 43740 | Rpl30       | 0.0000 | No |
| 43741 | Rpl30-ps1   | 0.0000 | No |
| 43742 | Rpl30-ps10  | 0.0000 | No |
| 43743 | Rpl30-ps11  | 0.0000 | No |

|       |            |        |    |
|-------|------------|--------|----|
| 43744 | Rpl30-ps2  | 0.0000 | No |
| 43745 | Rpl30-ps3  | 0.0000 | No |
| 43746 | Rpl30-ps5  | 0.0000 | No |
| 43747 | Rpl30-ps6  | 0.0000 | No |
| 43748 | Rpl30-ps8  | 0.0000 | No |
| 43749 | Rpl30-ps9  | 0.0000 | No |
| 43750 | Rpl31      | 0.0000 | No |
| 43751 | Rpl31-ps1  | 0.0000 | No |
| 43752 | Rpl31-ps10 | 0.0000 | No |
| 43753 | Rpl31-ps11 | 0.0000 | No |
| 43754 | Rpl31-ps12 | 0.0000 | No |
| 43755 | Rpl31-ps13 | 0.0000 | No |
| 43756 | Rpl31-ps14 | 0.0000 | No |
| 43757 | Rpl31-ps15 | 0.0000 | No |
| 43758 | Rpl31-ps17 | 0.0000 | No |
| 43759 | Rpl31-ps18 | 0.0000 | No |
| 43760 | Rpl31-ps20 | 0.0000 | No |
| 43761 | Rpl31-ps21 | 0.0000 | No |
| 43762 | Rpl31-ps22 | 0.0000 | No |
| 43763 | Rpl31-ps23 | 0.0000 | No |
| 43764 | Rpl31-ps25 | 0.0000 | No |
| 43765 | Rpl31-ps4  | 0.0000 | No |
| 43766 | Rpl31-ps5  | 0.0000 | No |
| 43767 | Rpl31-ps6  | 0.0000 | No |
| 43768 | Rpl31-ps7  | 0.0000 | No |
| 43769 | Rpl31-ps8  | 0.0000 | No |
| 43770 | Rpl31-ps9  | 0.0000 | No |
| 43771 | Rpl32      | 0.0000 | No |
| 43772 | Rpl32-ps   | 0.0000 | No |
| 43773 | Rpl34      | 0.0000 | No |
| 43774 | Rpl34-ps1  | 0.0000 | No |
| 43775 | Rpl34-ps2  | 0.0000 | No |
| 43776 | Rpl35      | 0.0000 | No |
| 43777 | Rpl35a-ps3 | 0.0000 | No |
| 43778 | Rpl35a-ps4 | 0.0000 | No |
| 43779 | Rpl35a-ps5 | 0.0000 | No |
| 43780 | Rpl35a-ps6 | 0.0000 | No |
| 43781 | Rpl35a-ps7 | 0.0000 | No |
| 43782 | Rpl36      | 0.0000 | No |
| 43783 | Rpl36a     | 0.0000 | No |
| 43784 | Rpl36a1    | 0.0000 | No |
| 43785 | Rpl36a-ps1 | 0.0000 | No |
| 43786 | Rpl36a-ps2 | 0.0000 | No |
| 43787 | Rpl36a-ps3 | 0.0000 | No |
| 43788 | Rpl36a-ps4 | 0.0000 | No |
| 43789 | Rpl36-ps1  | 0.0000 | No |



|       |            |        |    |
|-------|------------|--------|----|
| 43790 | Rpl36-ps10 | 0.0000 | No |
| 43791 | Rpl36-ps2  | 0.0000 | No |
| 43792 | Rpl36-ps3  | 0.0000 | No |
| 43793 | Rpl36-ps4  | 0.0000 | No |
| 43794 | Rpl36-ps7  | 0.0000 | No |
| 43795 | Rpl37      | 0.0000 | No |
| 43796 | Rpl37a     | 0.0000 | No |
| 43797 | Rpl37rt    | 0.0000 | No |
| 43798 | Rpl38-ps1  | 0.0000 | No |
| 43799 | Rpl38-ps2  | 0.0000 | No |
| 43800 | Rpl39      | 0.0000 | No |
| 43801 | Rpl39l     | 0.0000 | No |
| 43802 | Rpl39-ps   | 0.0000 | No |
| 43803 | Rpl3-ps1   | 0.0000 | No |
| 43804 | Rpl3-ps2   | 0.0000 | No |
| 43805 | Rpl4       | 0.0000 | No |
| 43806 | Rpl48-ps1  | 0.0000 | No |
| 43807 | Rpl5       | 0.0000 | No |
| 43808 | Rpl5-ps1   | 0.0000 | No |
| 43809 | Rpl5-ps2   | 0.0000 | No |
| 43810 | Rpl6       | 0.0000 | No |
| 43811 | Rpl6l      | 0.0000 | No |
| 43812 | Rpl7       | 0.0000 | No |
| 43813 | Rpl7a      | 0.0000 | No |
| 43814 | Rpl7a-ps10 | 0.0000 | No |
| 43815 | Rpl7a-ps11 | 0.0000 | No |
| 43816 | Rpl7a-ps12 | 0.0000 | No |
| 43817 | Rpl7a-ps13 | 0.0000 | No |
| 43818 | Rpl7a-ps14 | 0.0000 | No |
| 43819 | Rpl7a-ps2  | 0.0000 | No |
| 43820 | Rpl7a-ps3  | 0.0000 | No |
| 43821 | Rpl7a-ps5  | 0.0000 | No |
| 43822 | Rpl7a-ps7  | 0.0000 | No |
| 43823 | Rpl7a-ps8  | 0.0000 | No |
| 43824 | Rpl7l1     | 0.0000 | No |
| 43825 | Rpl7l1-ps1 | 0.0000 | No |
| 43826 | Rpl7-ps7   | 0.0000 | No |
| 43827 | Rpl8       | 0.0000 | No |
| 43828 | Rpl9       | 0.0000 | No |
| 43829 | Rpl9-ps1   | 0.0000 | No |
| 43830 | Rpl9-ps2   | 0.0000 | No |
| 43831 | Rpl9-ps3   | 0.0000 | No |
| 43832 | Rpl9-ps4   | 0.0000 | No |
| 43833 | Rpl9-ps5   | 0.0000 | No |
| 43834 | Rpl9-ps6   | 0.0000 | No |
| 43835 | Rpl9-ps7   | 0.0000 | No |

|       |            |        |    |
|-------|------------|--------|----|
| 43836 | Rpl9-ps8   | 0.0000 | No |
| 43837 | Rplp0      | 0.0000 | No |
| 43838 | Rplp0-ps1  | 0.0000 | No |
| 43839 | Rplp1      | 0.0000 | No |
| 43840 | Rplp1-ps1  | 0.0000 | No |
| 43841 | Rplp2      | 0.0000 | No |
| 43842 | Rpn1       | 0.0000 | No |
| 43843 | Rpn2       | 0.0000 | No |
| 43844 | Rpp14      | 0.0000 | No |
| 43845 | Rpp21      | 0.0000 | No |
| 43846 | Rpp251     | 0.0000 | No |
| 43847 | Rpp30      | 0.0000 | No |
| 43848 | Rpp38      | 0.0000 | No |
| 43849 | Rpp40      | 0.0000 | No |
| 43850 | Rpph1      | 0.0000 | No |
| 43851 | Rprd1a     | 0.0000 | No |
| 43852 | Rprd1b     | 0.0000 | No |
| 43853 | Rprd2      | 0.0000 | No |
| 43854 | Rprl1      | 0.0000 | No |
| 43855 | Rprl2      | 0.0000 | No |
| 43856 | Rprl3      | 0.0000 | No |
| 43857 | Rprml      | 0.0000 | No |
| 43858 | Rps10      | 0.0000 | No |
| 43859 | Rps10-ps1  | 0.0000 | No |
| 43860 | Rps10-ps2  | 0.0000 | No |
| 43861 | Rps10-ps3  | 0.0000 | No |
| 43862 | Rps10-ps4  | 0.0000 | No |
| 43863 | Rps11      | 0.0000 | No |
| 43864 | Rps11-ps1  | 0.0000 | No |
| 43865 | Rps11-ps2  | 0.0000 | No |
| 43866 | Rps11-ps3  | 0.0000 | No |
| 43867 | Rps11-ps4  | 0.0000 | No |
| 43868 | Rps11-ps5  | 0.0000 | No |
| 43869 | Rps12      | 0.0000 | No |
| 43870 | Rps1211    | 0.0000 | No |
| 43871 | Rps12-ps1  | 0.0000 | No |
| 43872 | Rps12-ps10 | 0.0000 | No |
| 43873 | Rps12-ps11 | 0.0000 | No |
| 43874 | Rps12-ps12 | 0.0000 | No |
| 43875 | Rps12-ps13 | 0.0000 | No |
| 43876 | Rps12-ps14 | 0.0000 | No |
| 43877 | Rps12-ps15 | 0.0000 | No |
| 43878 | Rps12-ps17 | 0.0000 | No |
| 43879 | Rps12-ps18 | 0.0000 | No |
| 43880 | Rps12-ps19 | 0.0000 | No |
| 43881 | Rps12-ps20 | 0.0000 | No |

|       |            |        |    |
|-------|------------|--------|----|
| 43882 | Rps12-ps21 | 0.0000 | No |
| 43883 | Rps12-ps22 | 0.0000 | No |
| 43884 | Rps12-ps23 | 0.0000 | No |
| 43885 | Rps12-ps24 | 0.0000 | No |
| 43886 | Rps12-ps26 | 0.0000 | No |
| 43887 | Rps12-ps3  | 0.0000 | No |
| 43888 | Rps12-ps4  | 0.0000 | No |
| 43889 | Rps12-ps5  | 0.0000 | No |
| 43890 | Rps12-ps6  | 0.0000 | No |
| 43891 | Rps12-ps7  | 0.0000 | No |
| 43892 | Rps12-ps9  | 0.0000 | No |
| 43893 | Rps13-ps1  | 0.0000 | No |
| 43894 | Rps13-ps4  | 0.0000 | No |
| 43895 | Rps13-ps5  | 0.0000 | No |
| 43896 | Rps13-ps6  | 0.0000 | No |
| 43897 | Rps13-ps7  | 0.0000 | No |
| 43898 | Rps14      | 0.0000 | No |
| 43899 | Rps15      | 0.0000 | No |
| 43900 | Rps15a     | 0.0000 | No |
| 43901 | Rps15a-ps1 | 0.0000 | No |
| 43902 | Rps15a-ps2 | 0.0000 | No |
| 43903 | Rps15a-ps3 | 0.0000 | No |
| 43904 | Rps15a-ps4 | 0.0000 | No |
| 43905 | Rps15a-ps5 | 0.0000 | No |
| 43906 | Rps15a-ps6 | 0.0000 | No |
| 43907 | Rps15a-ps7 | 0.0000 | No |
| 43908 | Rps15a-ps8 | 0.0000 | No |
| 43909 | Rps15-ps2  | 0.0000 | No |
| 43910 | Rps16      | 0.0000 | No |
| 43911 | Rps16-ps2  | 0.0000 | No |
| 43912 | Rps16-ps3  | 0.0000 | No |
| 43913 | Rps17      | 0.0000 | No |
| 43914 | Rps18      | 0.0000 | No |
| 43915 | Rps18-ps1  | 0.0000 | No |
| 43916 | Rps18-ps2  | 0.0000 | No |
| 43917 | Rps18-ps3  | 0.0000 | No |
| 43918 | Rps19bp1   | 0.0000 | No |
| 43919 | Rps19-ps1  | 0.0000 | No |
| 43920 | Rps19-ps10 | 0.0000 | No |
| 43921 | Rps19-ps11 | 0.0000 | No |
| 43922 | Rps19-ps12 | 0.0000 | No |
| 43923 | Rps19-ps13 | 0.0000 | No |
| 43924 | Rps19-ps14 | 0.0000 | No |
| 43925 | Rps19-ps2  | 0.0000 | No |
| 43926 | Rps19-ps3  | 0.0000 | No |
| 43927 | Rps19-ps4  | 0.0000 | No |

|       |            |        |    |
|-------|------------|--------|----|
| 43928 | Rps19-ps5  | 0.0000 | No |
| 43929 | Rps19-ps6  | 0.0000 | No |
| 43930 | Rps19-ps7  | 0.0000 | No |
| 43931 | Rps19-ps8  | 0.0000 | No |
| 43932 | Rps2       | 0.0000 | No |
| 43933 | Rps20      | 0.0000 | No |
| 43934 | Rps21      | 0.0000 | No |
| 43935 | Rps23      | 0.0000 | No |
| 43936 | Rps23-ps1  | 0.0000 | No |
| 43937 | Rps23-ps2  | 0.0000 | No |
| 43938 | Rps24-ps2  | 0.0000 | No |
| 43939 | Rps24-ps3  | 0.0000 | No |
| 43940 | Rps25-ps1  | 0.0000 | No |
| 43941 | Rps26      | 0.0000 | No |
| 43942 | Rps26-ps1  | 0.0000 | No |
| 43943 | Rps27      | 0.0000 | No |
| 43944 | Rps27a     | 0.0000 | No |
| 43945 | Rps27a-ps1 | 0.0000 | No |
| 43946 | Rps27a-ps2 | 0.0000 | No |
| 43947 | Rps27l     | 0.0000 | No |
| 43948 | Rps27-ps1  | 0.0000 | No |
| 43949 | Rps27rt    | 0.0000 | No |
| 43950 | Rps28      | 0.0000 | No |
| 43951 | Rps29      | 0.0000 | No |
| 43952 | Rps29-ps   | 0.0000 | No |
| 43953 | Rps2-ps10  | 0.0000 | No |
| 43954 | Rps2-ps11  | 0.0000 | No |
| 43955 | Rps2-ps13  | 0.0000 | No |
| 43956 | Rps2-ps2   | 0.0000 | No |
| 43957 | Rps2-ps3   | 0.0000 | No |
| 43958 | Rps2-ps4   | 0.0000 | No |
| 43959 | Rps2-ps5   | 0.0000 | No |
| 43960 | Rps2-ps6   | 0.0000 | No |
| 43961 | Rps2-ps9   | 0.0000 | No |
| 43962 | Rps3       | 0.0000 | No |
| 43963 | Rps3a1     | 0.0000 | No |
| 43964 | Rps3a2     | 0.0000 | No |
| 43965 | Rps3a3     | 0.0000 | No |
| 43966 | Rps4x      | 0.0000 | No |
| 43967 | Rps4x-ps   | 0.0000 | No |
| 43968 | Rps5       | 0.0000 | No |
| 43969 | Rps6       | 0.0000 | No |
| 43970 | Rps6ka1    | 0.0000 | No |
| 43971 | Rps6ka2    | 0.0000 | No |
| 43972 | Rps6ka4    | 0.0000 | No |
| 43973 | Rps6ka5    | 0.0000 | No |

|       |           |        |    |
|-------|-----------|--------|----|
| 43974 | Rps6ka6   | 0.0000 | No |
| 43975 | Rps6kb1   | 0.0000 | No |
| 43976 | Rps6kb2   | 0.0000 | No |
| 43977 | Rps6kc1   | 0.0000 | No |
| 43978 | Rps6kl1   | 0.0000 | No |
| 43979 | Rps6-ps1  | 0.0000 | No |
| 43980 | Rps6-ps2  | 0.0000 | No |
| 43981 | Rps6-ps3  | 0.0000 | No |
| 43982 | Rps6-ps4  | 0.0000 | No |
| 43983 | Rps7      | 0.0000 | No |
| 43984 | Rps7-ps1  | 0.0000 | No |
| 43985 | Rps8      | 0.0000 | No |
| 43986 | Rps8-ps1  | 0.0000 | No |
| 43987 | Rps8-ps2  | 0.0000 | No |
| 43988 | Rps8-ps3  | 0.0000 | No |
| 43989 | Rps8-ps4  | 0.0000 | No |
| 43990 | Rps9      | 0.0000 | No |
| 43991 | Rpsa      | 0.0000 | No |
| 43992 | Rpsa-ps1  | 0.0000 | No |
| 43993 | Rpsa-ps10 | 0.0000 | No |
| 43994 | Rpsa-ps11 | 0.0000 | No |
| 43995 | Rpsa-ps12 | 0.0000 | No |
| 43996 | Rpsa-ps2  | 0.0000 | No |
| 43997 | Rpsa-ps3  | 0.0000 | No |
| 43998 | Rpsa-ps4  | 0.0000 | No |
| 43999 | Rpsa-ps5  | 0.0000 | No |
| 44000 | Rpsa-ps9  | 0.0000 | No |
| 44001 | Rptn      | 0.0000 | No |
| 44002 | Rptor     | 0.0000 | No |
| 44003 | Rptoros   | 0.0000 | No |
| 44004 | Rpusd1    | 0.0000 | No |
| 44005 | Rpusd2    | 0.0000 | No |
| 44006 | Rpusd3    | 0.0000 | No |
| 44007 | Rpusd4    | 0.0000 | No |
| 44008 | Rrad      | 0.0000 | No |
| 44009 | Rrag      | 0.0000 | No |
| 44010 | Rragb     | 0.0000 | No |
| 44011 | Rragc     | 0.0000 | No |
| 44012 | Rragd     | 0.0000 | No |
| 44013 | Rras      | 0.0000 | No |
| 44014 | Rras2     | 0.0000 | No |
| 44015 | Rrbp1     | 0.0000 | No |
| 44016 | Rreb1     | 0.0000 | No |
| 44017 | Rrh       | 0.0000 | No |
| 44018 | Rrm1      | 0.0000 | No |
| 44019 | Rrm2      | 0.0000 | No |

|       |          |        |    |
|-------|----------|--------|----|
| 44020 | Rrm2b    | 0.0000 | No |
| 44021 | Rrn3     | 0.0000 | No |
| 44022 | Rrnad1   | 0.0000 | No |
| 44023 | Rrp1     | 0.0000 | No |
| 44024 | Rrp12    | 0.0000 | No |
| 44025 | Rrp15    | 0.0000 | No |
| 44026 | Rrp1b    | 0.0000 | No |
| 44027 | Rrp36    | 0.0000 | No |
| 44028 | Rrp7a    | 0.0000 | No |
| 44029 | Rrp8     | 0.0000 | No |
| 44030 | Rrp9     | 0.0000 | No |
| 44031 | Rrs1     | 0.0000 | No |
| 44032 | Rs1      | 0.0000 | No |
| 44033 | Rsad1    | 0.0000 | No |
| 44034 | Rsad2    | 0.0000 | No |
| 44035 | Rsb1     | 0.0000 | No |
| 44036 | Rsb11    | 0.0000 | No |
| 44037 | Rsc1a1   | 0.0000 | No |
| 44038 | Rsf1     | 0.0000 | No |
| 44039 | Rsf1os1  | 0.0000 | No |
| 44040 | Rsf1os2  | 0.0000 | No |
| 44041 | Rsg1     | 0.0000 | No |
| 44042 | Rsl1     | 0.0000 | No |
| 44043 | Rsl1d1   | 0.0000 | No |
| 44044 | Rsl24d1  | 0.0000 | No |
| 44045 | Rslcan18 | 0.0000 | No |
| 44046 | Rsph1    | 0.0000 | No |
| 44047 | Rsph10b  | 0.0000 | No |
| 44048 | Rsph14   | 0.0000 | No |
| 44049 | Rsph3a   | 0.0000 | No |
| 44050 | Rsph3b   | 0.0000 | No |
| 44051 | Rsph4a   | 0.0000 | No |
| 44052 | Rsph6a   | 0.0000 | No |
| 44053 | Rsph9    | 0.0000 | No |
| 44054 | Rspo1    | 0.0000 | No |
| 44055 | Rspo2    | 0.0000 | No |
| 44056 | Rspo3    | 0.0000 | No |
| 44057 | Rspo4    | 0.0000 | No |
| 44058 | Rspo4os  | 0.0000 | No |
| 44059 | Rspry1   | 0.0000 | No |
| 44060 | Rsrc1    | 0.0000 | No |
| 44061 | Rsrc2    | 0.0000 | No |
| 44062 | Rsrp1    | 0.0000 | No |
| 44063 | Rsu1     | 0.0000 | No |
| 44064 | Rtbdn    | 0.0000 | No |
| 44065 | Rtca     | 0.0000 | No |

|       |          |        |    |
|-------|----------|--------|----|
| 44066 | Rtcb     | 0.0000 | No |
| 44067 | Rtel1    | 0.0000 | No |
| 44068 | Rtf1     | 0.0000 | No |
| 44069 | Rtfdc1   | 0.0000 | No |
| 44070 | Rtkn2    | 0.0000 | No |
| 44071 | Rtl1     | 0.0000 | No |
| 44072 | Rtn1     | 0.0000 | No |
| 44073 | Rtn2     | 0.0000 | No |
| 44074 | Rtn3     | 0.0000 | No |
| 44075 | Rtn4     | 0.0000 | No |
| 44076 | Rtn4ip1  | 0.0000 | No |
| 44077 | Rtn4r    | 0.0000 | No |
| 44078 | Rtn4r11  | 0.0000 | No |
| 44079 | Rtn4r12  | 0.0000 | No |
| 44080 | Rtp2     | 0.0000 | No |
| 44081 | Rtp3     | 0.0000 | No |
| 44082 | Rtp4     | 0.0000 | No |
| 44083 | Rttn     | 0.0000 | No |
| 44084 | Rubcn    | 0.0000 | No |
| 44085 | Rubie    | 0.0000 | No |
| 44086 | Rufy1    | 0.0000 | No |
| 44087 | Rufy2    | 0.0000 | No |
| 44088 | Rufy3    | 0.0000 | No |
| 44089 | Rufy4    | 0.0000 | No |
| 44090 | Rundc1   | 0.0000 | No |
| 44091 | Rundc3a  | 0.0000 | No |
| 44092 | Rundc3b  | 0.0000 | No |
| 44093 | Runx1    | 0.0000 | No |
| 44094 | Runx1t1  | 0.0000 | No |
| 44095 | Runx2    | 0.0000 | No |
| 44096 | Runx2os1 | 0.0000 | No |
| 44097 | Runx2os2 | 0.0000 | No |
| 44098 | Runx2os3 | 0.0000 | No |
| 44099 | Runx3    | 0.0000 | No |
| 44100 | Rusc1    | 0.0000 | No |
| 44101 | Rusc2    | 0.0000 | No |
| 44102 | Ruvbl1   | 0.0000 | No |
| 44103 | Ruvbl2   | 0.0000 | No |
| 44104 | Rwdd1    | 0.0000 | No |
| 44105 | Rwdd2a   | 0.0000 | No |
| 44106 | Rwdd2b   | 0.0000 | No |
| 44107 | Rwdd3    | 0.0000 | No |
| 44108 | Rwdd4a   | 0.0000 | No |
| 44109 | Rxfp1    | 0.0000 | No |
| 44110 | Rxfp2    | 0.0000 | No |
| 44111 | Rxfp3    | 0.0000 | No |

|       |            |        |    |
|-------|------------|--------|----|
| 44112 | Rxfp4      | 0.0000 | No |
| 44113 | Rxra       | 0.0000 | No |
| 44114 | Rxrb       | 0.0000 | No |
| 44115 | Rxrg       | 0.0000 | No |
| 44116 | Rybp       | 0.0000 | No |
| 44117 | Rybp-ps    | 0.0000 | No |
| 44118 | Ryk        | 0.0000 | No |
| 44119 | Ryr1       | 0.0000 | No |
| 44120 | Ryr2       | 0.0000 | No |
| 44121 | Ryr3       | 0.0000 | No |
| 44122 | S100a10    | 0.0000 | No |
| 44123 | S100a11    | 0.0000 | No |
| 44124 | S100a11-ps | 0.0000 | No |
| 44125 | S100a13    | 0.0000 | No |
| 44126 | S100a14    | 0.0000 | No |
| 44127 | S100a16    | 0.0000 | No |
| 44128 | S100a2     | 0.0000 | No |
| 44129 | S100a3     | 0.0000 | No |
| 44130 | S100a4     | 0.0000 | No |
| 44131 | S100a5     | 0.0000 | No |
| 44132 | S100a6     | 0.0000 | No |
| 44133 | S100a7a    | 0.0000 | No |
| 44134 | S100b      | 0.0000 | No |
| 44135 | S100g      | 0.0000 | No |
| 44136 | S100pbp    | 0.0000 | No |
| 44137 | S100z      | 0.0000 | No |
| 44138 | S1pr1      | 0.0000 | No |
| 44139 | S1pr2      | 0.0000 | No |
| 44140 | S1pr3      | 0.0000 | No |
| 44141 | S1pr4      | 0.0000 | No |
| 44142 | S1pr5      | 0.0000 | No |
| 44143 | Saa1       | 0.0000 | No |
| 44144 | Saa2       | 0.0000 | No |
| 44145 | Saa3       | 0.0000 | No |
| 44146 | Saa4       | 0.0000 | No |
| 44147 | Saal1      | 0.0000 | No |
| 44148 | Saa-ps     | 0.0000 | No |
| 44149 | Sac3d1     | 0.0000 | No |
| 44150 | Sacm11     | 0.0000 | No |
| 44151 | Sacs       | 0.0000 | No |
| 44152 | Sae1       | 0.0000 | No |
| 44153 | Safb2      | 0.0000 | No |
| 44154 | Sag        | 0.0000 | No |
| 44155 | Sall2      | 0.0000 | No |
| 44156 | Sall4      | 0.0000 | No |
| 44157 | Samd1      | 0.0000 | No |



|       |           |        |    |
|-------|-----------|--------|----|
| 44158 | Samd10    | 0.0000 | No |
| 44159 | Samd11    | 0.0000 | No |
| 44160 | Samd13    | 0.0000 | No |
| 44161 | Samd14    | 0.0000 | No |
| 44162 | Samd15    | 0.0000 | No |
| 44163 | Samd3     | 0.0000 | No |
| 44164 | Samd4     | 0.0000 | No |
| 44165 | Samd4b    | 0.0000 | No |
| 44166 | Samd7     | 0.0000 | No |
| 44167 | Samd8     | 0.0000 | No |
| 44168 | Samd9l    | 0.0000 | No |
| 44169 | Samhd1    | 0.0000 | No |
| 44170 | Samm50    | 0.0000 | No |
| 44171 | Samsn1    | 0.0000 | No |
| 44172 | Samt1     | 0.0000 | No |
| 44173 | Samt2     | 0.0000 | No |
| 44174 | Samt3     | 0.0000 | No |
| 44175 | Samt4     | 0.0000 | No |
| 44176 | Sap130    | 0.0000 | No |
| 44177 | Sap18     | 0.0000 | No |
| 44178 | Sap18b    | 0.0000 | No |
| 44179 | Sap25     | 0.0000 | No |
| 44180 | Sap30     | 0.0000 | No |
| 44181 | Sap30bp   | 0.0000 | No |
| 44182 | Sap30bpos | 0.0000 | No |
| 44183 | Sap30l    | 0.0000 | No |
| 44184 | Sapcd1    | 0.0000 | No |
| 44185 | Sapcd2    | 0.0000 | No |
| 44186 | Sar1a     | 0.0000 | No |
| 44187 | Saraf     | 0.0000 | No |
| 44188 | Sardh     | 0.0000 | No |
| 44189 | Sardhos   | 0.0000 | No |
| 44190 | Sarm1     | 0.0000 | No |
| 44191 | Sarnp     | 0.0000 | No |
| 44192 | Sars      | 0.0000 | No |
| 44193 | Sars2     | 0.0000 | No |
| 44194 | Sart1     | 0.0000 | No |
| 44195 | Sart3     | 0.0000 | No |
| 44196 | Sash1     | 0.0000 | No |
| 44197 | Sash3     | 0.0000 | No |
| 44198 | Sass6     | 0.0000 | No |
| 44199 | Sat2      | 0.0000 | No |
| 44200 | Satb1     | 0.0000 | No |
| 44201 | Satb2     | 0.0000 | No |
| 44202 | Satl1     | 0.0000 | No |
| 44203 | Sav1      | 0.0000 | No |

|       |           |        |    |
|-------|-----------|--------|----|
| 44204 | Saxo1     | 0.0000 | No |
| 44205 | Saxo1os   | 0.0000 | No |
| 44206 | Saysd1    | 0.0000 | No |
| 44207 | Sbds      | 0.0000 | No |
| 44208 | Sbf1      | 0.0000 | No |
| 44209 | Sbf2      | 0.0000 | No |
| 44210 | Sbk1      | 0.0000 | No |
| 44211 | Sbk3      | 0.0000 | No |
| 44212 | Sbno1     | 0.0000 | No |
| 44213 | Sbno2     | 0.0000 | No |
| 44214 | Sbsn      | 0.0000 | No |
| 44215 | Sbspon    | 0.0000 | No |
| 44216 | Sc5d      | 0.0000 | No |
| 44217 | Scaf1     | 0.0000 | No |
| 44218 | Scaf11    | 0.0000 | No |
| 44219 | Scaf4     | 0.0000 | No |
| 44220 | Scaf8     | 0.0000 | No |
| 44221 | Scai      | 0.0000 | No |
| 44222 | Scamp1    | 0.0000 | No |
| 44223 | Scamp2    | 0.0000 | No |
| 44224 | Scamp3    | 0.0000 | No |
| 44225 | Scamp4    | 0.0000 | No |
| 44226 | Scand1    | 0.0000 | No |
| 44227 | Scap      | 0.0000 | No |
| 44228 | Scaper    | 0.0000 | No |
| 44229 | Scara3    | 0.0000 | No |
| 44230 | Scara5    | 0.0000 | No |
| 44231 | Scarb2    | 0.0000 | No |
| 44232 | Scarletlr | 0.0000 | No |
| 44233 | Scarna10  | 0.0000 | No |
| 44234 | Scarna13  | 0.0000 | No |
| 44235 | Scarna17  | 0.0000 | No |
| 44236 | Scarna2   | 0.0000 | No |
| 44237 | Scarna3a  | 0.0000 | No |
| 44238 | Scarna3b  | 0.0000 | No |
| 44239 | Scarna6   | 0.0000 | No |
| 44240 | Scarna8   | 0.0000 | No |
| 44241 | Scarna9   | 0.0000 | No |
| 44242 | Scpdh     | 0.0000 | No |
| 44243 | Scd2      | 0.0000 | No |
| 44244 | Scd3      | 0.0000 | No |
| 44245 | Scd4      | 0.0000 | No |
| 44246 | Scfd1     | 0.0000 | No |
| 44247 | Scfd2     | 0.0000 | No |
| 44248 | Scg2      | 0.0000 | No |
| 44249 | Scg3      | 0.0000 | No |

|       |             |        |    |
|-------|-------------|--------|----|
| 44250 | Scg5        | 0.0000 | No |
| 44251 | Scgb1a1     | 0.0000 | No |
| 44252 | Scgb1b10    | 0.0000 | No |
| 44253 | Scgb1b11    | 0.0000 | No |
| 44254 | Scgb1b12    | 0.0000 | No |
| 44255 | Scgb1b13-ps | 0.0000 | No |
| 44256 | Scgb1b14-ps | 0.0000 | No |
| 44257 | Scgb1b15    | 0.0000 | No |
| 44258 | Scgb1b16-ps | 0.0000 | No |
| 44259 | Scgb1b17    | 0.0000 | No |
| 44260 | Scgb1b18    | 0.0000 | No |
| 44261 | Scgb1b19    | 0.0000 | No |
| 44262 | Scgb1b1-ps  | 0.0000 | No |
| 44263 | Scgb1b2     | 0.0000 | No |
| 44264 | Scgb1b20    | 0.0000 | No |
| 44265 | Scgb1b21    | 0.0000 | No |
| 44266 | Scgb1b22-ps | 0.0000 | No |
| 44267 | Scgb1b23-ps | 0.0000 | No |
| 44268 | Scgb1b24    | 0.0000 | No |
| 44269 | Scgb1b25-ps | 0.0000 | No |
| 44270 | Scgb1b26-ps | 0.0000 | No |
| 44271 | Scgb1b29    | 0.0000 | No |
| 44272 | Scgb1b3     | 0.0000 | No |
| 44273 | Scgb1b30    | 0.0000 | No |
| 44274 | Scgb1b34-ps | 0.0000 | No |
| 44275 | Scgb1b4-ps  | 0.0000 | No |
| 44276 | Scgb1b5-ps  | 0.0000 | No |
| 44277 | Scgb1b6-ps  | 0.0000 | No |
| 44278 | Scgb1b7     | 0.0000 | No |
| 44279 | Scgb1b8-ps  | 0.0000 | No |
| 44280 | Scgb1b9-ps  | 0.0000 | No |
| 44281 | Scgb1c1     | 0.0000 | No |
| 44282 | Scgb2b1     | 0.0000 | No |
| 44283 | Scgb2b10    | 0.0000 | No |
| 44284 | Scgb2b11    | 0.0000 | No |
| 44285 | Scgb2b12    | 0.0000 | No |
| 44286 | Scgb2b13-ps | 0.0000 | No |
| 44287 | Scgb2b14-ps | 0.0000 | No |
| 44288 | Scgb2b15    | 0.0000 | No |
| 44289 | Scgb2b16-ps | 0.0000 | No |
| 44290 | Scgb2b17    | 0.0000 | No |
| 44291 | Scgb2b18    | 0.0000 | No |
| 44292 | Scgb2b19    | 0.0000 | No |
| 44293 | Scgb2b2     | 0.0000 | No |
| 44294 | Scgb2b22-ps | 0.0000 | No |
| 44295 | Scgb2b24    | 0.0000 | No |

|       |             |        |    |
|-------|-------------|--------|----|
| 44296 | Scgb2b26    | 0.0000 | No |
| 44297 | Scgb2b27    | 0.0000 | No |
| 44298 | Scgb2b28-ps | 0.0000 | No |
| 44299 | Scgb2b29-ps | 0.0000 | No |
| 44300 | Scgb2b3     | 0.0000 | No |
| 44301 | Scgb2b30    | 0.0000 | No |
| 44302 | Scgb2b31-ps | 0.0000 | No |
| 44303 | Scgb2b32-ps | 0.0000 | No |
| 44304 | Scgb2b33    | 0.0000 | No |
| 44305 | Scgb2b4-ps  | 0.0000 | No |
| 44306 | Scgb2b6     | 0.0000 | No |
| 44307 | Scgb2b7     | 0.0000 | No |
| 44308 | Scgb2b8-ps  | 0.0000 | No |
| 44309 | Scgb2b9-ps  | 0.0000 | No |
| 44310 | Scgb3a1     | 0.0000 | No |
| 44311 | Scgb3a2     | 0.0000 | No |
| 44312 | Scgn        | 0.0000 | No |
| 44313 | Schip1      | 0.0000 | No |
| 44314 | Scimp       | 0.0000 | No |
| 44315 | Scin        | 0.0000 | No |
| 44316 | Sclt1       | 0.0000 | No |
| 44317 | Scmh1       | 0.0000 | No |
| 44318 | Scml1       | 0.0000 | No |
| 44319 | Scml2       | 0.0000 | No |
| 44320 | Scml4       | 0.0000 | No |
| 44321 | Scn10a      | 0.0000 | No |
| 44322 | Scn11a      | 0.0000 | No |
| 44323 | Scn1a       | 0.0000 | No |
| 44324 | Scn1b       | 0.0000 | No |
| 44325 | Scn2a       | 0.0000 | No |
| 44326 | Scn2b       | 0.0000 | No |
| 44327 | Scn3a       | 0.0000 | No |
| 44328 | Scn3b       | 0.0000 | No |
| 44329 | Scn4b       | 0.0000 | No |
| 44330 | Scn5a       | 0.0000 | No |
| 44331 | Scn7a       | 0.0000 | No |
| 44332 | Scn8a       | 0.0000 | No |
| 44333 | Scnm1       | 0.0000 | No |
| 44334 | Scnn1a      | 0.0000 | No |
| 44335 | Scnn1g      | 0.0000 | No |
| 44336 | Sco1        | 0.0000 | No |
| 44337 | Sco2        | 0.0000 | No |
| 44338 | Scoc        | 0.0000 | No |
| 44339 | Scp2        | 0.0000 | No |
| 44340 | Scp2d1      | 0.0000 | No |
| 44341 | Scp2-ps1    | 0.0000 | No |

|       |          |        |    |
|-------|----------|--------|----|
| 44342 | Scp2-ps2 | 0.0000 | No |
| 44343 | Scpep1   | 0.0000 | No |
| 44344 | Scpep1os | 0.0000 | No |
| 44345 | Scrg1    | 0.0000 | No |
| 44346 | Scrib    | 0.0000 | No |
| 44347 | Scrn1    | 0.0000 | No |
| 44348 | Scrn2    | 0.0000 | No |
| 44349 | Scrn3    | 0.0000 | No |
| 44350 | Sct2     | 0.0000 | No |
| 44351 | Sct      | 0.0000 | No |
| 44352 | Sctr     | 0.0000 | No |
| 44353 | Scube1   | 0.0000 | No |
| 44354 | Scube2   | 0.0000 | No |
| 44355 | Scube3   | 0.0000 | No |
| 44356 | Scyl2    | 0.0000 | No |
| 44357 | Scyl3    | 0.0000 | No |
| 44358 | Sdad1    | 0.0000 | No |
| 44359 | Sdc3     | 0.0000 | No |
| 44360 | Sdcbp    | 0.0000 | No |
| 44361 | Sdcbp2   | 0.0000 | No |
| 44362 | Sdccag3  | 0.0000 | No |
| 44363 | Sdccag8  | 0.0000 | No |
| 44364 | Sde2     | 0.0000 | No |
| 44365 | Sdf2     | 0.0000 | No |
| 44366 | Sdf2l1   | 0.0000 | No |
| 44367 | Sdf4     | 0.0000 | No |
| 44368 | Sdha     | 0.0000 | No |
| 44369 | Sdhaf2   | 0.0000 | No |
| 44370 | Sdhaf3   | 0.0000 | No |
| 44371 | Sdhaf4   | 0.0000 | No |
| 44372 | Sdhb     | 0.0000 | No |
| 44373 | Sdhc     | 0.0000 | No |
| 44374 | Sdhd     | 0.0000 | No |
| 44375 | Sdk1     | 0.0000 | No |
| 44376 | Sdk2     | 0.0000 | No |
| 44377 | Sdpr     | 0.0000 | No |
| 44378 | Sdr16c6  | 0.0000 | No |
| 44379 | Sdr39u1  | 0.0000 | No |
| 44380 | Sdr42e1  | 0.0000 | No |
| 44381 | Sds      | 0.0000 | No |
| 44382 | Sdsl     | 0.0000 | No |
| 44383 | Sebox    | 0.0000 | No |
| 44384 | Sec1     | 0.0000 | No |
| 44385 | Sec11a   | 0.0000 | No |
| 44386 | Sec11c   | 0.0000 | No |
| 44387 | Sec13    | 0.0000 | No |

|       |          |        |    |
|-------|----------|--------|----|
| 44388 | Sec1411  | 0.0000 | No |
| 44389 | Sec1412  | 0.0000 | No |
| 44390 | Sec1413  | 0.0000 | No |
| 44391 | Sec1414  | 0.0000 | No |
| 44392 | Sec1415  | 0.0000 | No |
| 44393 | Sec16a   | 0.0000 | No |
| 44394 | Sec16b   | 0.0000 | No |
| 44395 | Sec22a   | 0.0000 | No |
| 44396 | Sec22b   | 0.0000 | No |
| 44397 | Sec22c   | 0.0000 | No |
| 44398 | Sec23a   | 0.0000 | No |
| 44399 | Sec23b   | 0.0000 | No |
| 44400 | Sec23ip  | 0.0000 | No |
| 44401 | Sec24a   | 0.0000 | No |
| 44402 | Sec24b   | 0.0000 | No |
| 44403 | Sec24c   | 0.0000 | No |
| 44404 | Sec24d   | 0.0000 | No |
| 44405 | Sec31a   | 0.0000 | No |
| 44406 | Sec31b   | 0.0000 | No |
| 44407 | Sec61a1  | 0.0000 | No |
| 44408 | Sec61a2  | 0.0000 | No |
| 44409 | Sec61b   | 0.0000 | No |
| 44410 | Sec61g   | 0.0000 | No |
| 44411 | Sec62    | 0.0000 | No |
| 44412 | Sec63    | 0.0000 | No |
| 44413 | Secisbp2 | 0.0000 | No |
| 44414 | Sectm1a  | 0.0000 | No |
| 44415 | Seh11    | 0.0000 | No |
| 44416 | Sel112   | 0.0000 | No |
| 44417 | Sel113   | 0.0000 | No |
| 44418 | Sele     | 0.0000 | No |
| 44419 | Selenof  | 0.0000 | No |
| 44420 | Selenoh  | 0.0000 | No |
| 44421 | Selenoi  | 0.0000 | No |
| 44422 | Selenok  | 0.0000 | No |
| 44423 | Selenom  | 0.0000 | No |
| 44424 | Selenon  | 0.0000 | No |
| 44425 | Selenoo  | 0.0000 | No |
| 44426 | Selenop  | 0.0000 | No |
| 44427 | Selenos  | 0.0000 | No |
| 44428 | Selenot  | 0.0000 | No |
| 44429 | Selenov  | 0.0000 | No |
| 44430 | Selenow  | 0.0000 | No |
| 44431 | Sell     | 0.0000 | No |
| 44432 | Selp     | 0.0000 | No |
| 44433 | Selplg   | 0.0000 | No |

|       |         |        |    |
|-------|---------|--------|----|
| 44434 | Sema3a  | 0.0000 | No |
| 44435 | Sema3b  | 0.0000 | No |
| 44436 | Sema3c  | 0.0000 | No |
| 44437 | Sema3d  | 0.0000 | No |
| 44438 | Sema3e  | 0.0000 | No |
| 44439 | Sema3f  | 0.0000 | No |
| 44440 | Sema3g  | 0.0000 | No |
| 44441 | Sema4a  | 0.0000 | No |
| 44442 | Sema4b  | 0.0000 | No |
| 44443 | Sema4d  | 0.0000 | No |
| 44444 | Sema4f  | 0.0000 | No |
| 44445 | Sema4g  | 0.0000 | No |
| 44446 | Sema5a  | 0.0000 | No |
| 44447 | Sema5b  | 0.0000 | No |
| 44448 | Sema6a  | 0.0000 | No |
| 44449 | Sema6b  | 0.0000 | No |
| 44450 | Sema7a  | 0.0000 | No |
| 44451 | Senp1   | 0.0000 | No |
| 44452 | Senp2   | 0.0000 | No |
| 44453 | Senp3   | 0.0000 | No |
| 44454 | Senp5   | 0.0000 | No |
| 44455 | Senp6   | 0.0000 | No |
| 44456 | Senp7   | 0.0000 | No |
| 44457 | Senp8   | 0.0000 | No |
| 44458 | Sephs1  | 0.0000 | No |
| 44459 | Sephs2  | 0.0000 | No |
| 44460 | Sepsecs | 0.0000 | No |
| 44461 | 1-Sep   | 0.0000 | No |
| 44462 | 10-Sep  | 0.0000 | No |
| 44463 | 12-Sep  | 0.0000 | No |
| 44464 | 14-Sep  | 0.0000 | No |
| 44465 | 2-Sep   | 0.0000 | No |
| 44466 | 3-Sep   | 0.0000 | No |
| 44467 | 6-Sep   | 0.0000 | No |
| 44468 | 7-Sep   | 0.0000 | No |
| 44469 | 8-Sep   | 0.0000 | No |
| 44470 | 9-Sep   | 0.0000 | No |
| 44471 | Serac1  | 0.0000 | No |
| 44472 | Serbp1  | 0.0000 | No |
| 44473 | Serf1   | 0.0000 | No |
| 44474 | Serf2   | 0.0000 | No |
| 44475 | Serhl   | 0.0000 | No |
| 44476 | Serinc1 | 0.0000 | No |
| 44477 | Serinc2 | 0.0000 | No |
| 44478 | Serinc3 | 0.0000 | No |
| 44479 | Serinc4 | 0.0000 | No |

|       |              |        |    |
|-------|--------------|--------|----|
| 44480 | Serinc5      | 0.0000 | No |
| 44481 | Serp2        | 0.0000 | No |
| 44482 | Serpina10    | 0.0000 | No |
| 44483 | Serpina11    | 0.0000 | No |
| 44484 | Serpina12    | 0.0000 | No |
| 44485 | Serpina16    | 0.0000 | No |
| 44486 | Serpina1a    | 0.0000 | No |
| 44487 | Serpina1b    | 0.0000 | No |
| 44488 | Serpina1c    | 0.0000 | No |
| 44489 | Serpina1d    | 0.0000 | No |
| 44490 | Serpina1e    | 0.0000 | No |
| 44491 | Serpina1f    | 0.0000 | No |
| 44492 | Serpina3a    | 0.0000 | No |
| 44493 | Serpina3c    | 0.0000 | No |
| 44494 | Serpina3e-ps | 0.0000 | No |
| 44495 | Serpina3f    | 0.0000 | No |
| 44496 | Serpina3g    | 0.0000 | No |
| 44497 | Serpina3j    | 0.0000 | No |
| 44498 | Serpina3k    | 0.0000 | No |
| 44499 | Serpina3l-ps | 0.0000 | No |
| 44500 | Serpina3m    | 0.0000 | No |
| 44501 | Serpina3n    | 0.0000 | No |
| 44502 | Serpina4-ps1 | 0.0000 | No |
| 44503 | Serpina5     | 0.0000 | No |
| 44504 | Serpina7     | 0.0000 | No |
| 44505 | Serpina9     | 0.0000 | No |
| 44506 | Serpinb10    | 0.0000 | No |
| 44507 | Serpinb11    | 0.0000 | No |
| 44508 | Serpinb12    | 0.0000 | No |
| 44509 | Serpinb1a    | 0.0000 | No |
| 44510 | Serpinb1b    | 0.0000 | No |
| 44511 | Serpinb1c    | 0.0000 | No |
| 44512 | Serpinb1-ps1 | 0.0000 | No |
| 44513 | Serpinb3a    | 0.0000 | No |
| 44514 | Serpinb3d    | 0.0000 | No |
| 44515 | Serpinb5     | 0.0000 | No |
| 44516 | Serpinb6a    | 0.0000 | No |
| 44517 | Serpinb6b    | 0.0000 | No |
| 44518 | Serpinb6c    | 0.0000 | No |
| 44519 | Serpinb6d    | 0.0000 | No |
| 44520 | Serpinb6e    | 0.0000 | No |
| 44521 | Serpinb8     | 0.0000 | No |
| 44522 | Serpinb9     | 0.0000 | No |
| 44523 | Serpinb9b    | 0.0000 | No |
| 44524 | Serpinb9c    | 0.0000 | No |
| 44525 | Serpinb9e    | 0.0000 | No |



|       |           |        |    |
|-------|-----------|--------|----|
| 44526 | Serpinb9f | 0.0000 | No |
| 44527 | Serpinb9g | 0.0000 | No |
| 44528 | Serpinc1  | 0.0000 | No |
| 44529 | Serpind1  | 0.0000 | No |
| 44530 | Serpine1  | 0.0000 | No |
| 44531 | Serpine2  | 0.0000 | No |
| 44532 | Serpine3  | 0.0000 | No |
| 44533 | Serpinf1  | 0.0000 | No |
| 44534 | Serpinf2  | 0.0000 | No |
| 44535 | Serping1  | 0.0000 | No |
| 44536 | Serpinh1  | 0.0000 | No |
| 44537 | Serpini1  | 0.0000 | No |
| 44538 | Serpini2  | 0.0000 | No |
| 44539 | Sertad1   | 0.0000 | No |
| 44540 | Sertad2   | 0.0000 | No |
| 44541 | Sertad3   | 0.0000 | No |
| 44542 | Sertad4   | 0.0000 | No |
| 44543 | Sertm1    | 0.0000 | No |
| 44544 | Sesn1     | 0.0000 | No |
| 44545 | Sesn2     | 0.0000 | No |
| 44546 | Sesn3     | 0.0000 | No |
| 44547 | Sestd1    | 0.0000 | No |
| 44548 | Set       | 0.0000 | No |
| 44549 | Setbp1    | 0.0000 | No |
| 44550 | Setd1a    | 0.0000 | No |
| 44551 | Setd1b    | 0.0000 | No |
| 44552 | Setd2     | 0.0000 | No |
| 44553 | Setd3     | 0.0000 | No |
| 44554 | Setd4     | 0.0000 | No |
| 44555 | Setd5     | 0.0000 | No |
| 44556 | Setd6     | 0.0000 | No |
| 44557 | Setd7     | 0.0000 | No |
| 44558 | Setdb1    | 0.0000 | No |
| 44559 | Setdb2    | 0.0000 | No |
| 44560 | Setmar    | 0.0000 | No |
| 44561 | Setx      | 0.0000 | No |
| 44562 | Sez6      | 0.0000 | No |
| 44563 | Sez6l     | 0.0000 | No |
| 44564 | Sez6l2    | 0.0000 | No |
| 44565 | Sf1       | 0.0000 | No |
| 44566 | Sf3a1     | 0.0000 | No |
| 44567 | Sf3a2     | 0.0000 | No |
| 44568 | Sf3a3     | 0.0000 | No |
| 44569 | Sf3b1     | 0.0000 | No |
| 44570 | Sf3b2     | 0.0000 | No |
| 44571 | Sf3b3     | 0.0000 | No |

|       |        |        |    |
|-------|--------|--------|----|
| 44572 | Sf3b4  | 0.0000 | No |
| 44573 | Sf3b5  | 0.0000 | No |
| 44574 | Sf3b6  | 0.0000 | No |
| 44575 | Sfi1   | 0.0000 | No |
| 44576 | Sfmbt1 | 0.0000 | No |
| 44577 | Sfmbt2 | 0.0000 | No |
| 44578 | Sfn    | 0.0000 | No |
| 44579 | Sfpq   | 0.0000 | No |
| 44580 | Sfr1   | 0.0000 | No |
| 44581 | Sfrp1  | 0.0000 | No |
| 44582 | Sfrp2  | 0.0000 | No |
| 44583 | Sfrp4  | 0.0000 | No |
| 44584 | Sfrp5  | 0.0000 | No |
| 44585 | Sfswap | 0.0000 | No |
| 44586 | Sft2d1 | 0.0000 | No |
| 44587 | Sft2d2 | 0.0000 | No |
| 44588 | Sft2d3 | 0.0000 | No |
| 44589 | Sfta2  | 0.0000 | No |
| 44590 | Sftpb  | 0.0000 | No |
| 44591 | Sftpc  | 0.0000 | No |
| 44592 | Sftpd  | 0.0000 | No |
| 44593 | Sfxn1  | 0.0000 | No |
| 44594 | Sfxn2  | 0.0000 | No |
| 44595 | Sfxn3  | 0.0000 | No |
| 44596 | Sfxn4  | 0.0000 | No |
| 44597 | Sfxn5  | 0.0000 | No |
| 44598 | Sgca   | 0.0000 | No |
| 44599 | Sgcd   | 0.0000 | No |
| 44600 | Sgce   | 0.0000 | No |
| 44601 | Sgcz   | 0.0000 | No |
| 44602 | Sgf29  | 0.0000 | No |
| 44603 | Sgip1  | 0.0000 | No |
| 44604 | Sgk1   | 0.0000 | No |
| 44605 | Sgk3   | 0.0000 | No |
| 44606 | Sgms1  | 0.0000 | No |
| 44607 | Sgol1  | 0.0000 | No |
| 44608 | Sgol2a | 0.0000 | No |
| 44609 | Sgol2b | 0.0000 | No |
| 44610 | Sgpl1  | 0.0000 | No |
| 44611 | Sgpp1  | 0.0000 | No |
| 44612 | Sgpp2  | 0.0000 | No |
| 44613 | Sgsh   | 0.0000 | No |
| 44614 | Sgsm1  | 0.0000 | No |
| 44615 | Sgsm2  | 0.0000 | No |
| 44616 | Sgsm3  | 0.0000 | No |
| 44617 | Sgta   | 0.0000 | No |

|       |            |        |    |
|-------|------------|--------|----|
| 44618 | Sgtb       | 0.0000 | No |
| 44619 | Sh2b2      | 0.0000 | No |
| 44620 | Sh2b3      | 0.0000 | No |
| 44621 | Sh2d1b2    | 0.0000 | No |
| 44622 | Sh2d3c     | 0.0000 | No |
| 44623 | Sh2d4a     | 0.0000 | No |
| 44624 | Sh2d4b     | 0.0000 | No |
| 44625 | Sh2d5      | 0.0000 | No |
| 44626 | Sh2d6      | 0.0000 | No |
| 44627 | Sh2d7      | 0.0000 | No |
| 44628 | Sh3bgr     | 0.0000 | No |
| 44629 | Sh3bgr1    | 0.0000 | No |
| 44630 | Sh3bgr13   | 0.0000 | No |
| 44631 | Sh3bp1     | 0.0000 | No |
| 44632 | Sh3bp2     | 0.0000 | No |
| 44633 | Sh3bp4     | 0.0000 | No |
| 44634 | Sh3bp5     | 0.0000 | No |
| 44635 | Sh3bp51    | 0.0000 | No |
| 44636 | Sh3d19     | 0.0000 | No |
| 44637 | Sh3d21     | 0.0000 | No |
| 44638 | Sh3d2c-ps1 | 0.0000 | No |
| 44639 | Sh3gl1     | 0.0000 | No |
| 44640 | Sh3gl2     | 0.0000 | No |
| 44641 | Sh3gl3     | 0.0000 | No |
| 44642 | Sh3glb1    | 0.0000 | No |
| 44643 | Sh3glb2    | 0.0000 | No |
| 44644 | Sh3kbp1    | 0.0000 | No |
| 44645 | Sh3pxd2b   | 0.0000 | No |
| 44646 | Sh3rf1     | 0.0000 | No |
| 44647 | Sh3rf2     | 0.0000 | No |
| 44648 | Sh3rf3     | 0.0000 | No |
| 44649 | Sh3tc1     | 0.0000 | No |
| 44650 | Sh3tc2     | 0.0000 | No |
| 44651 | Sh3yl1     | 0.0000 | No |
| 44652 | Shank1     | 0.0000 | No |
| 44653 | Shank2     | 0.0000 | No |
| 44654 | Shank3     | 0.0000 | No |
| 44655 | Sharpin    | 0.0000 | No |
| 44656 | Shb        | 0.0000 | No |
| 44657 | Shbg       | 0.0000 | No |
| 44658 | Shc1       | 0.0000 | No |
| 44659 | Shc3       | 0.0000 | No |
| 44660 | Shc4       | 0.0000 | No |
| 44661 | Shcbp1     | 0.0000 | No |
| 44662 | Shcbp11    | 0.0000 | No |
| 44663 | Shd        | 0.0000 | No |

|       |          |        |    |
|-------|----------|--------|----|
| 44664 | She      | 0.0000 | No |
| 44665 | Shf      | 0.0000 | No |
| 44666 | Shfm1    | 0.0000 | No |
| 44667 | Shh      | 0.0000 | No |
| 44668 | Shisa3   | 0.0000 | No |
| 44669 | Shisa4   | 0.0000 | No |
| 44670 | Shisa5   | 0.0000 | No |
| 44671 | Shisa6   | 0.0000 | No |
| 44672 | Shisa7   | 0.0000 | No |
| 44673 | Shisa9   | 0.0000 | No |
| 44674 | Shkbp1   | 0.0000 | No |
| 44675 | Shmt2    | 0.0000 | No |
| 44676 | Shoc2    | 0.0000 | No |
| 44677 | Shox2    | 0.0000 | No |
| 44678 | Shpk     | 0.0000 | No |
| 44679 | Shprh    | 0.0000 | No |
| 44680 | Shq1     | 0.0000 | No |
| 44681 | Shroom1  | 0.0000 | No |
| 44682 | Shroom2  | 0.0000 | No |
| 44683 | Shroom3  | 0.0000 | No |
| 44684 | Shroom4  | 0.0000 | No |
| 44685 | Siae     | 0.0000 | No |
| 44686 | Siah1a   | 0.0000 | No |
| 44687 | Siah1b   | 0.0000 | No |
| 44688 | Siah2    | 0.0000 | No |
| 44689 | Siah3    | 0.0000 | No |
| 44690 | Sidt1    | 0.0000 | No |
| 44691 | Sidt2    | 0.0000 | No |
| 44692 | Sigirr   | 0.0000 | No |
| 44693 | Siglec1  | 0.0000 | No |
| 44694 | Siglec15 | 0.0000 | No |
| 44695 | Siglece  | 0.0000 | No |
| 44696 | Siglecf  | 0.0000 | No |
| 44697 | Siglech  | 0.0000 | No |
| 44698 | Sigmar1  | 0.0000 | No |
| 44699 | Sik1     | 0.0000 | No |
| 44700 | Sik2     | 0.0000 | No |
| 44701 | Sik3     | 0.0000 | No |
| 44702 | Sike1    | 0.0000 | No |
| 44703 | Sil1     | 0.0000 | No |
| 44704 | Sim1     | 0.0000 | No |
| 44705 | Sim2     | 0.0000 | No |
| 44706 | Simc1    | 0.0000 | No |
| 44707 | Sin3a    | 0.0000 | No |
| 44708 | Sin3b    | 0.0000 | No |
| 44709 | Sipa1    | 0.0000 | No |

|       |            |        |    |
|-------|------------|--------|----|
| 44710 | Sipa111    | 0.0000 | No |
| 44711 | Sipa112    | 0.0000 | No |
| 44712 | Sipa113    | 0.0000 | No |
| 44713 | Sirpa      | 0.0000 | No |
| 44714 | Sirpb1a    | 0.0000 | No |
| 44715 | Sirpb1c    | 0.0000 | No |
| 44716 | Sirt1      | 0.0000 | No |
| 44717 | Sirt2      | 0.0000 | No |
| 44718 | Sirt3      | 0.0000 | No |
| 44719 | Sirt4      | 0.0000 | No |
| 44720 | Sirt5      | 0.0000 | No |
| 44721 | Sirt6      | 0.0000 | No |
| 44722 | Sirt7      | 0.0000 | No |
| 44723 | Sis        | 0.0000 | No |
| 44724 | Siva1      | 0.0000 | No |
| 44725 | Six1       | 0.0000 | No |
| 44726 | Six2       | 0.0000 | No |
| 44727 | Six3       | 0.0000 | No |
| 44728 | Six3os1    | 0.0000 | No |
| 44729 | Six4       | 0.0000 | No |
| 44730 | Six5       | 0.0000 | No |
| 44731 | Six6       | 0.0000 | No |
| 44732 | Ska1       | 0.0000 | No |
| 44733 | Ska2       | 0.0000 | No |
| 44734 | Ska2l-ps   | 0.0000 | No |
| 44735 | Ska3       | 0.0000 | No |
| 44736 | Ski        | 0.0000 | No |
| 44737 | Skida1     | 0.0000 | No |
| 44738 | Skil       | 0.0000 | No |
| 44739 | Skint1     | 0.0000 | No |
| 44740 | Skint10    | 0.0000 | No |
| 44741 | Skint11    | 0.0000 | No |
| 44742 | Skint2     | 0.0000 | No |
| 44743 | Skint3     | 0.0000 | No |
| 44744 | Skint4     | 0.0000 | No |
| 44745 | Skint5     | 0.0000 | No |
| 44746 | Skint6     | 0.0000 | No |
| 44747 | Skint7     | 0.0000 | No |
| 44748 | Skiv2l     | 0.0000 | No |
| 44749 | Skiv2l2    | 0.0000 | No |
| 44750 | Skiv2l-ps1 | 0.0000 | No |
| 44751 | Skor1      | 0.0000 | No |
| 44752 | Skor2      | 0.0000 | No |
| 44753 | Skp1a      | 0.0000 | No |
| 44754 | Skp2       | 0.0000 | No |
| 44755 | Sla        | 0.0000 | No |

|       |           |        |    |
|-------|-----------|--------|----|
| 44756 | Slain1    | 0.0000 | No |
| 44757 | Slain1os  | 0.0000 | No |
| 44758 | Slamf7    | 0.0000 | No |
| 44759 | Slamf8    | 0.0000 | No |
| 44760 | Slamf9    | 0.0000 | No |
| 44761 | Slbp      | 0.0000 | No |
| 44762 | Slc10a1   | 0.0000 | No |
| 44763 | Slc10a2   | 0.0000 | No |
| 44764 | Slc10a3   | 0.0000 | No |
| 44765 | Slc10a4   | 0.0000 | No |
| 44766 | Slc10a5   | 0.0000 | No |
| 44767 | Slc10a6   | 0.0000 | No |
| 44768 | Slc10a7   | 0.0000 | No |
| 44769 | Slc11a1   | 0.0000 | No |
| 44770 | Slc12a1   | 0.0000 | No |
| 44771 | Slc12a2   | 0.0000 | No |
| 44772 | Slc12a3   | 0.0000 | No |
| 44773 | Slc12a4   | 0.0000 | No |
| 44774 | Slc12a5   | 0.0000 | No |
| 44775 | Slc12a6   | 0.0000 | No |
| 44776 | Slc12a8   | 0.0000 | No |
| 44777 | Slc12a9   | 0.0000 | No |
| 44778 | Slc13a1   | 0.0000 | No |
| 44779 | Slc13a2   | 0.0000 | No |
| 44780 | Slc13a2os | 0.0000 | No |
| 44781 | Slc13a3   | 0.0000 | No |
| 44782 | Slc13a4   | 0.0000 | No |
| 44783 | Slc13a5   | 0.0000 | No |
| 44784 | Slc14a1   | 0.0000 | No |
| 44785 | Slc15a2   | 0.0000 | No |
| 44786 | Slc15a3   | 0.0000 | No |
| 44787 | Slc15a5   | 0.0000 | No |
| 44788 | Slc16a10  | 0.0000 | No |
| 44789 | Slc16a11  | 0.0000 | No |
| 44790 | Slc16a13  | 0.0000 | No |
| 44791 | Slc16a14  | 0.0000 | No |
| 44792 | Slc16a3   | 0.0000 | No |
| 44793 | Slc16a4   | 0.0000 | No |
| 44794 | Slc16a5   | 0.0000 | No |
| 44795 | Slc16a6   | 0.0000 | No |
| 44796 | Slc16a8   | 0.0000 | No |
| 44797 | Slc17a1   | 0.0000 | No |
| 44798 | Slc17a2   | 0.0000 | No |
| 44799 | Slc17a3   | 0.0000 | No |
| 44800 | Slc17a4   | 0.0000 | No |
| 44801 | Slc17a5   | 0.0000 | No |

|       |              |        |    |
|-------|--------------|--------|----|
| 44802 | Slc17a6      | 0.0000 | No |
| 44803 | Slc17a7      | 0.0000 | No |
| 44804 | Slc17a8      | 0.0000 | No |
| 44805 | Slc17a9      | 0.0000 | No |
| 44806 | Slc18a1      | 0.0000 | No |
| 44807 | Slc18a2      | 0.0000 | No |
| 44808 | Slc18a3      | 0.0000 | No |
| 44809 | Slc18b1      | 0.0000 | No |
| 44810 | Slc19a1      | 0.0000 | No |
| 44811 | Slc19a2      | 0.0000 | No |
| 44812 | Slc19a3      | 0.0000 | No |
| 44813 | Slc1a1       | 0.0000 | No |
| 44814 | Slc1a2       | 0.0000 | No |
| 44815 | Slc1a4       | 0.0000 | No |
| 44816 | Slc1a5       | 0.0000 | No |
| 44817 | Slc1a6       | 0.0000 | No |
| 44818 | Slc1a7       | 0.0000 | No |
| 44819 | Slc20a1      | 0.0000 | No |
| 44820 | Slc20a2      | 0.0000 | No |
| 44821 | Slc22a1      | 0.0000 | No |
| 44822 | Slc22a12     | 0.0000 | No |
| 44823 | Slc22a13     | 0.0000 | No |
| 44824 | Slc22a13b-ps | 0.0000 | No |
| 44825 | Slc22a14     | 0.0000 | No |
| 44826 | Slc22a15     | 0.0000 | No |
| 44827 | Slc22a17     | 0.0000 | No |
| 44828 | Slc22a18     | 0.0000 | No |
| 44829 | Slc22a2      | 0.0000 | No |
| 44830 | Slc22a20     | 0.0000 | No |
| 44831 | Slc22a22     | 0.0000 | No |
| 44832 | Slc22a23     | 0.0000 | No |
| 44833 | Slc22a26     | 0.0000 | No |
| 44834 | Slc22a29     | 0.0000 | No |
| 44835 | Slc22a3      | 0.0000 | No |
| 44836 | Slc22a30     | 0.0000 | No |
| 44837 | Slc22a4      | 0.0000 | No |
| 44838 | Slc22a5      | 0.0000 | No |
| 44839 | Slc22a8      | 0.0000 | No |
| 44840 | Slc23a1      | 0.0000 | No |
| 44841 | Slc23a2      | 0.0000 | No |
| 44842 | Slc23a3      | 0.0000 | No |
| 44843 | Slc23a4      | 0.0000 | No |
| 44844 | Slc24a1      | 0.0000 | No |
| 44845 | Slc24a2      | 0.0000 | No |
| 44846 | Slc24a3      | 0.0000 | No |
| 44847 | Slc24a4      | 0.0000 | No |

|       |            |        |    |
|-------|------------|--------|----|
| 44848 | Slc24a5    | 0.0000 | No |
| 44849 | Slc25a1    | 0.0000 | No |
| 44850 | Slc25a10   | 0.0000 | No |
| 44851 | Slc25a11   | 0.0000 | No |
| 44852 | Slc25a12   | 0.0000 | No |
| 44853 | Slc25a13   | 0.0000 | No |
| 44854 | Slc25a14   | 0.0000 | No |
| 44855 | Slc25a15   | 0.0000 | No |
| 44856 | Slc25a16   | 0.0000 | No |
| 44857 | Slc25a17   | 0.0000 | No |
| 44858 | Slc25a18   | 0.0000 | No |
| 44859 | Slc25a19   | 0.0000 | No |
| 44860 | Slc25a2    | 0.0000 | No |
| 44861 | Slc25a20   | 0.0000 | No |
| 44862 | Slc25a21   | 0.0000 | No |
| 44863 | Slc25a22   | 0.0000 | No |
| 44864 | Slc25a23   | 0.0000 | No |
| 44865 | Slc25a25   | 0.0000 | No |
| 44866 | Slc25a26   | 0.0000 | No |
| 44867 | Slc25a27   | 0.0000 | No |
| 44868 | Slc25a28   | 0.0000 | No |
| 44869 | Slc25a29   | 0.0000 | No |
| 44870 | Slc25a3    | 0.0000 | No |
| 44871 | Slc25a30   | 0.0000 | No |
| 44872 | Slc25a31   | 0.0000 | No |
| 44873 | Slc25a32   | 0.0000 | No |
| 44874 | Slc25a33   | 0.0000 | No |
| 44875 | Slc25a34   | 0.0000 | No |
| 44876 | Slc25a35   | 0.0000 | No |
| 44877 | Slc25a36   | 0.0000 | No |
| 44878 | Slc25a37   | 0.0000 | No |
| 44879 | Slc25a39   | 0.0000 | No |
| 44880 | Slc25a4    | 0.0000 | No |
| 44881 | Slc25a40   | 0.0000 | No |
| 44882 | Slc25a41   | 0.0000 | No |
| 44883 | Slc25a42   | 0.0000 | No |
| 44884 | Slc25a44   | 0.0000 | No |
| 44885 | Slc25a45   | 0.0000 | No |
| 44886 | Slc25a47   | 0.0000 | No |
| 44887 | Slc25a48   | 0.0000 | No |
| 44888 | Slc25a5    | 0.0000 | No |
| 44889 | Slc25a51   | 0.0000 | No |
| 44890 | Slc25a54   | 0.0000 | No |
| 44891 | Slc25a5-ps | 0.0000 | No |
| 44892 | Slc26a1    | 0.0000 | No |
| 44893 | Slc26a10   | 0.0000 | No |



|       |             |        |    |
|-------|-------------|--------|----|
| 44894 | Slc26a11    | 0.0000 | No |
| 44895 | Slc26a2     | 0.0000 | No |
| 44896 | Slc26a3     | 0.0000 | No |
| 44897 | Slc26a4     | 0.0000 | No |
| 44898 | Slc26a5     | 0.0000 | No |
| 44899 | Slc26a6     | 0.0000 | No |
| 44900 | Slc26a7     | 0.0000 | No |
| 44901 | Slc26a8     | 0.0000 | No |
| 44902 | Slc26a9     | 0.0000 | No |
| 44903 | Slc27a1     | 0.0000 | No |
| 44904 | Slc27a2     | 0.0000 | No |
| 44905 | Slc27a3     | 0.0000 | No |
| 44906 | Slc27a4     | 0.0000 | No |
| 44907 | Slc27a5     | 0.0000 | No |
| 44908 | Slc28a1     | 0.0000 | No |
| 44909 | Slc28a2     | 0.0000 | No |
| 44910 | Slc28a3     | 0.0000 | No |
| 44911 | Slc29a1     | 0.0000 | No |
| 44912 | Slc29a2     | 0.0000 | No |
| 44913 | Slc29a3     | 0.0000 | No |
| 44914 | Slc29a4     | 0.0000 | No |
| 44915 | Slc2a1      | 0.0000 | No |
| 44916 | Slc2a10     | 0.0000 | No |
| 44917 | Slc2a12     | 0.0000 | No |
| 44918 | Slc2a13     | 0.0000 | No |
| 44919 | Slc2a2      | 0.0000 | No |
| 44920 | Slc2a3      | 0.0000 | No |
| 44921 | Slc2a4      | 0.0000 | No |
| 44922 | Slc2a4rg-ps | 0.0000 | No |
| 44923 | Slc2a5      | 0.0000 | No |
| 44924 | Slc2a7      | 0.0000 | No |
| 44925 | Slc2a8      | 0.0000 | No |
| 44926 | Slc2a9      | 0.0000 | No |
| 44927 | Slc30a1     | 0.0000 | No |
| 44928 | Slc30a10    | 0.0000 | No |
| 44929 | Slc30a3     | 0.0000 | No |
| 44930 | Slc30a4     | 0.0000 | No |
| 44931 | Slc30a6     | 0.0000 | No |
| 44932 | Slc30a7     | 0.0000 | No |
| 44933 | Slc30a8     | 0.0000 | No |
| 44934 | Slc30a9     | 0.0000 | No |
| 44935 | Slc31a1     | 0.0000 | No |
| 44936 | Slc31a2     | 0.0000 | No |
| 44937 | Slc32a1     | 0.0000 | No |
| 44938 | Slc33a1     | 0.0000 | No |
| 44939 | Slc34a2     | 0.0000 | No |

|       |           |        |    |
|-------|-----------|--------|----|
| 44940 | Slc34a3   | 0.0000 | No |
| 44941 | Slc35a1   | 0.0000 | No |
| 44942 | Slc35a2   | 0.0000 | No |
| 44943 | Slc35a3   | 0.0000 | No |
| 44944 | Slc35a4   | 0.0000 | No |
| 44945 | Slc35a5   | 0.0000 | No |
| 44946 | Slc35b1   | 0.0000 | No |
| 44947 | Slc35b2   | 0.0000 | No |
| 44948 | Slc35b3   | 0.0000 | No |
| 44949 | Slc35b4   | 0.0000 | No |
| 44950 | Slc35c1   | 0.0000 | No |
| 44951 | Slc35c2   | 0.0000 | No |
| 44952 | Slc35d1   | 0.0000 | No |
| 44953 | Slc35d2   | 0.0000 | No |
| 44954 | Slc35e1   | 0.0000 | No |
| 44955 | Slc35e2   | 0.0000 | No |
| 44956 | Slc35e3   | 0.0000 | No |
| 44957 | Slc35e4   | 0.0000 | No |
| 44958 | Slc35f1   | 0.0000 | No |
| 44959 | Slc35f2   | 0.0000 | No |
| 44960 | Slc35f3   | 0.0000 | No |
| 44961 | Slc35f4   | 0.0000 | No |
| 44962 | Slc35f5   | 0.0000 | No |
| 44963 | Slc35f6   | 0.0000 | No |
| 44964 | Slc35g1   | 0.0000 | No |
| 44965 | Slc35g2   | 0.0000 | No |
| 44966 | Slc35g3   | 0.0000 | No |
| 44967 | Slc36a1   | 0.0000 | No |
| 44968 | Slc36a1os | 0.0000 | No |
| 44969 | Slc36a2   | 0.0000 | No |
| 44970 | Slc36a3   | 0.0000 | No |
| 44971 | Slc36a3os | 0.0000 | No |
| 44972 | Slc36a4   | 0.0000 | No |
| 44973 | Slc37a1   | 0.0000 | No |
| 44974 | Slc37a2   | 0.0000 | No |
| 44975 | Slc37a4   | 0.0000 | No |
| 44976 | Slc38a1   | 0.0000 | No |
| 44977 | Slc38a10  | 0.0000 | No |
| 44978 | Slc38a11  | 0.0000 | No |
| 44979 | Slc38a2   | 0.0000 | No |
| 44980 | Slc38a3   | 0.0000 | No |
| 44981 | Slc38a4   | 0.0000 | No |
| 44982 | Slc38a6   | 0.0000 | No |
| 44983 | Slc38a7   | 0.0000 | No |
| 44984 | Slc38a8   | 0.0000 | No |
| 44985 | Slc38a9   | 0.0000 | No |

|       |            |        |    |
|-------|------------|--------|----|
| 44986 | Slc39a1    | 0.0000 | No |
| 44987 | Slc39a10   | 0.0000 | No |
| 44988 | Slc39a11   | 0.0000 | No |
| 44989 | Slc39a12   | 0.0000 | No |
| 44990 | Slc39a13   | 0.0000 | No |
| 44991 | Slc39a14   | 0.0000 | No |
| 44992 | Slc39a1-ps | 0.0000 | No |
| 44993 | Slc39a2    | 0.0000 | No |
| 44994 | Slc39a3    | 0.0000 | No |
| 44995 | Slc39a4    | 0.0000 | No |
| 44996 | Slc39a5    | 0.0000 | No |
| 44997 | Slc39a6    | 0.0000 | No |
| 44998 | Slc39a7    | 0.0000 | No |
| 44999 | Slc39a8    | 0.0000 | No |
| 45000 | Slc39a9    | 0.0000 | No |
| 45001 | Slc3a1     | 0.0000 | No |
| 45002 | Slc3a2     | 0.0000 | No |
| 45003 | Slc40a1    | 0.0000 | No |
| 45004 | Slc41a1    | 0.0000 | No |
| 45005 | Slc41a2    | 0.0000 | No |
| 45006 | Slc41a3    | 0.0000 | No |
| 45007 | Slc43a2    | 0.0000 | No |
| 45008 | Slc43a3    | 0.0000 | No |
| 45009 | Slc44a1    | 0.0000 | No |
| 45010 | Slc44a2    | 0.0000 | No |
| 45011 | Slc44a3    | 0.0000 | No |
| 45012 | Slc44a4    | 0.0000 | No |
| 45013 | Slc44a5    | 0.0000 | No |
| 45014 | Slc45a1    | 0.0000 | No |
| 45015 | Slc45a2    | 0.0000 | No |
| 45016 | Slc45a4    | 0.0000 | No |
| 45017 | Slc46a1    | 0.0000 | No |
| 45018 | Slc46a2    | 0.0000 | No |
| 45019 | Slc46a3    | 0.0000 | No |
| 45020 | Slc47a1    | 0.0000 | No |
| 45021 | Slc47a2    | 0.0000 | No |
| 45022 | Slc48a1    | 0.0000 | No |
| 45023 | Slc4a10    | 0.0000 | No |
| 45024 | Slc4a11    | 0.0000 | No |
| 45025 | Slc4a1ap   | 0.0000 | No |
| 45026 | Slc4a2     | 0.0000 | No |
| 45027 | Slc4a3     | 0.0000 | No |
| 45028 | Slc4a4     | 0.0000 | No |
| 45029 | Slc4a5     | 0.0000 | No |
| 45030 | Slc4a7     | 0.0000 | No |
| 45031 | Slc4a8     | 0.0000 | No |

|       |           |        |    |
|-------|-----------|--------|----|
| 45032 | Slc4a9    | 0.0000 | No |
| 45033 | Slc50a1   | 0.0000 | No |
| 45034 | Slc51a    | 0.0000 | No |
| 45035 | Slc52a2   | 0.0000 | No |
| 45036 | Slc52a3   | 0.0000 | No |
| 45037 | Slc5a1    | 0.0000 | No |
| 45038 | Slc5a10   | 0.0000 | No |
| 45039 | Slc5a11   | 0.0000 | No |
| 45040 | Slc5a12   | 0.0000 | No |
| 45041 | Slc5a2    | 0.0000 | No |
| 45042 | Slc5a3    | 0.0000 | No |
| 45043 | Slc5a4a   | 0.0000 | No |
| 45044 | Slc5a6    | 0.0000 | No |
| 45045 | Slc5a7    | 0.0000 | No |
| 45046 | Slc5a8    | 0.0000 | No |
| 45047 | Slc5a9    | 0.0000 | No |
| 45048 | Slc6a1    | 0.0000 | No |
| 45049 | Slc6a11   | 0.0000 | No |
| 45050 | Slc6a13   | 0.0000 | No |
| 45051 | Slc6a14   | 0.0000 | No |
| 45052 | Slc6a15   | 0.0000 | No |
| 45053 | Slc6a17   | 0.0000 | No |
| 45054 | Slc6a18   | 0.0000 | No |
| 45055 | Slc6a19   | 0.0000 | No |
| 45056 | Slc6a19os | 0.0000 | No |
| 45057 | Slc6a2    | 0.0000 | No |
| 45058 | Slc6a20a  | 0.0000 | No |
| 45059 | Slc6a20b  | 0.0000 | No |
| 45060 | Slc6a21   | 0.0000 | No |
| 45061 | Slc6a3    | 0.0000 | No |
| 45062 | Slc6a5    | 0.0000 | No |
| 45063 | Slc6a6    | 0.0000 | No |
| 45064 | Slc6a7    | 0.0000 | No |
| 45065 | Slc6a8    | 0.0000 | No |
| 45066 | Slc6a9    | 0.0000 | No |
| 45067 | Slc7a1    | 0.0000 | No |
| 45068 | Slc7a10   | 0.0000 | No |
| 45069 | Slc7a11   | 0.0000 | No |
| 45070 | Slc7a13   | 0.0000 | No |
| 45071 | Slc7a14   | 0.0000 | No |
| 45072 | Slc7a15   | 0.0000 | No |
| 45073 | Slc7a2    | 0.0000 | No |
| 45074 | Slc7a3    | 0.0000 | No |
| 45075 | Slc7a4    | 0.0000 | No |
| 45076 | Slc7a6    | 0.0000 | No |
| 45077 | Slc7a6os  | 0.0000 | No |

|       |           |        |    |
|-------|-----------|--------|----|
| 45078 | Slc8a1    | 0.0000 | No |
| 45079 | Slc8a2    | 0.0000 | No |
| 45080 | Slc8a3    | 0.0000 | No |
| 45081 | Slc8b1    | 0.0000 | No |
| 45082 | Slc9a1    | 0.0000 | No |
| 45083 | Slc9a2    | 0.0000 | No |
| 45084 | Slc9a3    | 0.0000 | No |
| 45085 | Slc9a3r1  | 0.0000 | No |
| 45086 | Slc9a3r2  | 0.0000 | No |
| 45087 | Slc9a4    | 0.0000 | No |
| 45088 | Slc9a5    | 0.0000 | No |
| 45089 | Slc9a6    | 0.0000 | No |
| 45090 | Slc9a7    | 0.0000 | No |
| 45091 | Slc9a8    | 0.0000 | No |
| 45092 | Slc9b1    | 0.0000 | No |
| 45093 | Slc9b2    | 0.0000 | No |
| 45094 | Slc9c1    | 0.0000 | No |
| 45095 | Slco1a1   | 0.0000 | No |
| 45096 | Slco1a4   | 0.0000 | No |
| 45097 | Slco1a5   | 0.0000 | No |
| 45098 | Slco1a6   | 0.0000 | No |
| 45099 | Slco1b2   | 0.0000 | No |
| 45100 | Slco1c1   | 0.0000 | No |
| 45101 | Slco2a1   | 0.0000 | No |
| 45102 | Slco2b1   | 0.0000 | No |
| 45103 | Slco3a1   | 0.0000 | No |
| 45104 | Slco4a1   | 0.0000 | No |
| 45105 | Slco5a1   | 0.0000 | No |
| 45106 | Slco6b1   | 0.0000 | No |
| 45107 | Slco6c1   | 0.0000 | No |
| 45108 | Slco6d1   | 0.0000 | No |
| 45109 | Slf1      | 0.0000 | No |
| 45110 | Slfn1     | 0.0000 | No |
| 45111 | Slfn10-ps | 0.0000 | No |
| 45112 | Slfn14    | 0.0000 | No |
| 45113 | Slfn2     | 0.0000 | No |
| 45114 | Slfn3     | 0.0000 | No |
| 45115 | Slfn4     | 0.0000 | No |
| 45116 | Slfn5     | 0.0000 | No |
| 45117 | Slfn5os   | 0.0000 | No |
| 45118 | Slfn8     | 0.0000 | No |
| 45119 | Slfn9     | 0.0000 | No |
| 45120 | Slfnl1    | 0.0000 | No |
| 45121 | Slirp     | 0.0000 | No |
| 45122 | Slit1     | 0.0000 | No |
| 45123 | Slit2     | 0.0000 | No |

|       |            |        |    |
|-------|------------|--------|----|
| 45124 | Slit3      | 0.0000 | No |
| 45125 | Slitrk1    | 0.0000 | No |
| 45126 | Slitrk3    | 0.0000 | No |
| 45127 | Slitrk4    | 0.0000 | No |
| 45128 | Slitrk5    | 0.0000 | No |
| 45129 | Slitrk6    | 0.0000 | No |
| 45130 | Slk        | 0.0000 | No |
| 45131 | Smap       | 0.0000 | No |
| 45132 | Smapos2    | 0.0000 | No |
| 45133 | Smo1       | 0.0000 | No |
| 45134 | Smo2       | 0.0000 | No |
| 45135 | Sltm       | 0.0000 | No |
| 45136 | Slu7       | 0.0000 | No |
| 45137 | Slurp1     | 0.0000 | No |
| 45138 | Slurp2     | 0.0000 | No |
| 45139 | Slx        | 0.0000 | No |
| 45140 | Slx1b      | 0.0000 | No |
| 45141 | Slx4       | 0.0000 | No |
| 45142 | Slx11      | 0.0000 | No |
| 45143 | Sly        | 0.0000 | No |
| 45144 | Smad1      | 0.0000 | No |
| 45145 | Smad2      | 0.0000 | No |
| 45146 | Smad4      | 0.0000 | No |
| 45147 | Smad5      | 0.0000 | No |
| 45148 | Smad7      | 0.0000 | No |
| 45149 | Smad9      | 0.0000 | No |
| 45150 | Smagp      | 0.0000 | No |
| 45151 | Smap1      | 0.0000 | No |
| 45152 | Smap2      | 0.0000 | No |
| 45153 | Smarca1    | 0.0000 | No |
| 45154 | Smarca2    | 0.0000 | No |
| 45155 | Smarca4    | 0.0000 | No |
| 45156 | Smarca5    | 0.0000 | No |
| 45157 | Smarca5-ps | 0.0000 | No |
| 45158 | Smarcad1   | 0.0000 | No |
| 45159 | Smarca11   | 0.0000 | No |
| 45160 | Smarcb1    | 0.0000 | No |
| 45161 | Smarcc1    | 0.0000 | No |
| 45162 | Smarcc2    | 0.0000 | No |
| 45163 | Smarcd1    | 0.0000 | No |
| 45164 | Smarcd2    | 0.0000 | No |
| 45165 | Smarcd3    | 0.0000 | No |
| 45166 | Smarce1    | 0.0000 | No |
| 45167 | Smc1a      | 0.0000 | No |
| 45168 | Smc1b      | 0.0000 | No |
| 45169 | Smc2       | 0.0000 | No |

|       |           |        |    |
|-------|-----------|--------|----|
| 45170 | Smc2os    | 0.0000 | No |
| 45171 | Smc3      | 0.0000 | No |
| 45172 | Smc4      | 0.0000 | No |
| 45173 | Smc5      | 0.0000 | No |
| 45174 | Smc6      | 0.0000 | No |
| 45175 | Smchd1    | 0.0000 | No |
| 45176 | Smco2     | 0.0000 | No |
| 45177 | Smco3     | 0.0000 | No |
| 45178 | Smco4     | 0.0000 | No |
| 45179 | Smcp      | 0.0000 | No |
| 45180 | Smcr8     | 0.0000 | No |
| 45181 | Smdt1     | 0.0000 | No |
| 45182 | Smek1     | 0.0000 | No |
| 45183 | Smek2     | 0.0000 | No |
| 45184 | Smek3-ps  | 0.0000 | No |
| 45185 | Smg1      | 0.0000 | No |
| 45186 | Smg5      | 0.0000 | No |
| 45187 | Smg6      | 0.0000 | No |
| 45188 | Smg7      | 0.0000 | No |
| 45189 | Smg8      | 0.0000 | No |
| 45190 | Smg9      | 0.0000 | No |
| 45191 | Smgc      | 0.0000 | No |
| 45192 | Smim1     | 0.0000 | No |
| 45193 | Smim1011  | 0.0000 | No |
| 45194 | Smim1012a | 0.0000 | No |
| 45195 | Smim11    | 0.0000 | No |
| 45196 | Smim12    | 0.0000 | No |
| 45197 | Smim13    | 0.0000 | No |
| 45198 | Smim15    | 0.0000 | No |
| 45199 | Smim18    | 0.0000 | No |
| 45200 | Smim19    | 0.0000 | No |
| 45201 | Smim20    | 0.0000 | No |
| 45202 | Smim22    | 0.0000 | No |
| 45203 | Smim23    | 0.0000 | No |
| 45204 | Smim24    | 0.0000 | No |
| 45205 | Smim3     | 0.0000 | No |
| 45206 | Smim4     | 0.0000 | No |
| 45207 | Smim5     | 0.0000 | No |
| 45208 | Smim6     | 0.0000 | No |
| 45209 | Smim7     | 0.0000 | No |
| 45210 | Smim8     | 0.0000 | No |
| 45211 | Smim9     | 0.0000 | No |
| 45212 | Smkr-ps   | 0.0000 | No |
| 45213 | Smlr1     | 0.0000 | No |
| 45214 | Smn1      | 0.0000 | No |
| 45215 | Smndc1    | 0.0000 | No |

|       |            |        |    |
|-------|------------|--------|----|
| 45216 | Smo        | 0.0000 | No |
| 45217 | Smoc1      | 0.0000 | No |
| 45218 | Smoc2      | 0.0000 | No |
| 45219 | Smok2a     | 0.0000 | No |
| 45220 | Smok2b     | 0.0000 | No |
| 45221 | Smok3a     | 0.0000 | No |
| 45222 | Smok3b     | 0.0000 | No |
| 45223 | Smok3c     | 0.0000 | No |
| 45224 | SmoX       | 0.0000 | No |
| 45225 | Smpd1      | 0.0000 | No |
| 45226 | Smpd2      | 0.0000 | No |
| 45227 | Smpd3      | 0.0000 | No |
| 45228 | Smpd4      | 0.0000 | No |
| 45229 | Smpd5      | 0.0000 | No |
| 45230 | Smpd13a    | 0.0000 | No |
| 45231 | Smpd13b    | 0.0000 | No |
| 45232 | SmpX       | 0.0000 | No |
| 45233 | Smr2       | 0.0000 | No |
| 45234 | Smr3a      | 0.0000 | No |
| 45235 | Sms        | 0.0000 | No |
| 45236 | Smt3h1-ps  | 0.0000 | No |
| 45237 | Smt3h2-ps  | 0.0000 | No |
| 45238 | Smt3h2-ps2 | 0.0000 | No |
| 45239 | Smt3h2-ps4 | 0.0000 | No |
| 45240 | Smtn       | 0.0000 | No |
| 45241 | Smtn12     | 0.0000 | No |
| 45242 | Smu1       | 0.0000 | No |
| 45243 | Smug1      | 0.0000 | No |
| 45244 | Smurf1     | 0.0000 | No |
| 45245 | Smurf2     | 0.0000 | No |
| 45246 | Smyd1      | 0.0000 | No |
| 45247 | Smyd2      | 0.0000 | No |
| 45248 | Smyd3      | 0.0000 | No |
| 45249 | Smyd4      | 0.0000 | No |
| 45250 | Smyd5      | 0.0000 | No |
| 45251 | Snai1      | 0.0000 | No |
| 45252 | Snai3      | 0.0000 | No |
| 45253 | Snap23     | 0.0000 | No |
| 45254 | Snap25     | 0.0000 | No |
| 45255 | Snap29     | 0.0000 | No |
| 45256 | Snap47     | 0.0000 | No |
| 45257 | Snap91     | 0.0000 | No |
| 45258 | Snapc1     | 0.0000 | No |
| 45259 | Snapc2     | 0.0000 | No |
| 45260 | Snapc3     | 0.0000 | No |
| 45261 | Snapc4     | 0.0000 | No |



|       |          |        |    |
|-------|----------|--------|----|
| 45262 | Snape5   | 0.0000 | No |
| 45263 | Snapin   | 0.0000 | No |
| 45264 | Snca     | 0.0000 | No |
| 45265 | Sncaip   | 0.0000 | No |
| 45266 | Sncg     | 0.0000 | No |
| 45267 | Snd1     | 0.0000 | No |
| 45268 | Sned1    | 0.0000 | No |
| 45269 | Snf8     | 0.0000 | No |
| 45270 | Snhg1    | 0.0000 | No |
| 45271 | Snhg11   | 0.0000 | No |
| 45272 | Snhg12   | 0.0000 | No |
| 45273 | Snhg14   | 0.0000 | No |
| 45274 | Snhg15   | 0.0000 | No |
| 45275 | Snhg17   | 0.0000 | No |
| 45276 | Snhg20   | 0.0000 | No |
| 45277 | Snhg3    | 0.0000 | No |
| 45278 | Snhg4    | 0.0000 | No |
| 45279 | Snhg5    | 0.0000 | No |
| 45280 | Snhg6    | 0.0000 | No |
| 45281 | Snhg7    | 0.0000 | No |
| 45282 | Snhg7os  | 0.0000 | No |
| 45283 | Snhg8    | 0.0000 | No |
| 45284 | Snip1    | 0.0000 | No |
| 45285 | Snn      | 0.0000 | No |
| 45286 | Snora15  | 0.0000 | No |
| 45287 | Snora16a | 0.0000 | No |
| 45288 | Snora17  | 0.0000 | No |
| 45289 | SNORA17  | 0.0000 | No |
| 45290 | Snora19  | 0.0000 | No |
| 45291 | Snora20  | 0.0000 | No |
| 45292 | Snora23  | 0.0000 | No |
| 45293 | Snora24  | 0.0000 | No |
| 45294 | Snora26  | 0.0000 | No |
| 45295 | Snora28  | 0.0000 | No |
| 45296 | SNORA28  | 0.0000 | No |
| 45297 | Snora2b  | 0.0000 | No |
| 45298 | Snora3   | 0.0000 | No |
| 45299 | Snora30  | 0.0000 | No |
| 45300 | Snora31  | 0.0000 | No |
| 45301 | Snora33  | 0.0000 | No |
| 45302 | Snora34  | 0.0000 | No |
| 45303 | Snora35  | 0.0000 | No |
| 45304 | Snora36b | 0.0000 | No |
| 45305 | Snora41  | 0.0000 | No |
| 45306 | Snora43  | 0.0000 | No |
| 45307 | Snora44  | 0.0000 | No |

|       |             |        |    |
|-------|-------------|--------|----|
| 45308 | Snora47     | 0.0000 | No |
| 45309 | Snora52     | 0.0000 | No |
| 45310 | Snora57     | 0.0000 | No |
| 45311 | Snora5c     | 0.0000 | No |
| 45312 | Snora61     | 0.0000 | No |
| 45313 | Snora62     | 0.0000 | No |
| 45314 | Snora64     | 0.0000 | No |
| 45315 | Snora65     | 0.0000 | No |
| 45316 | Snora68     | 0.0000 | No |
| 45317 | Snora69     | 0.0000 | No |
| 45318 | Snora70     | 0.0000 | No |
| 45319 | Snora73a    | 0.0000 | No |
| 45320 | Snora73b    | 0.0000 | No |
| 45321 | Snora74a    | 0.0000 | No |
| 45322 | Snora75     | 0.0000 | No |
| 45323 | SNORA77     | 0.0000 | No |
| 45324 | Snora78     | 0.0000 | No |
| 45325 | Snora7a     | 0.0000 | No |
| 45326 | Snora81     | 0.0000 | No |
| 45327 | Snora9      | 0.0000 | No |
| 45328 | Snord100    | 0.0000 | No |
| 45329 | SNORD103    | 0.0000 | No |
| 45330 | Snord104    | 0.0000 | No |
| 45331 | Snord107    | 0.0000 | No |
| 45332 | Snord11     | 0.0000 | No |
| 45333 | Snord110    | 0.0000 | No |
| 45334 | Snord111    | 0.0000 | No |
| 45335 | SNORD113    | 0.0000 | No |
| 45336 | Snord11611  | 0.0000 | No |
| 45337 | Snord116110 | 0.0000 | No |
| 45338 | Snord116111 | 0.0000 | No |
| 45339 | Snord116112 | 0.0000 | No |
| 45340 | Snord116113 | 0.0000 | No |
| 45341 | Snord116114 | 0.0000 | No |
| 45342 | Snord116115 | 0.0000 | No |
| 45343 | Snord116116 | 0.0000 | No |
| 45344 | Snord116117 | 0.0000 | No |
| 45345 | Snord11612  | 0.0000 | No |
| 45346 | Snord11613  | 0.0000 | No |
| 45347 | Snord11614  | 0.0000 | No |
| 45348 | Snord11615  | 0.0000 | No |
| 45349 | Snord11616  | 0.0000 | No |
| 45350 | Snord11617  | 0.0000 | No |
| 45351 | Snord11618  | 0.0000 | No |
| 45352 | Snord11619  | 0.0000 | No |
| 45353 | Snord12     | 0.0000 | No |

|       |          |        |    |
|-------|----------|--------|----|
| 45354 | Snord123 | 0.0000 | No |
| 45355 | Snord14a | 0.0000 | No |
| 45356 | Snord14c | 0.0000 | No |
| 45357 | Snord14d | 0.0000 | No |
| 45358 | Snord14e | 0.0000 | No |
| 45359 | Snord15b | 0.0000 | No |
| 45360 | Snord16a | 0.0000 | No |
| 45361 | Snord17  | 0.0000 | No |
| 45362 | Snord19  | 0.0000 | No |
| 45363 | Snord1a  | 0.0000 | No |
| 45364 | Snord1b  | 0.0000 | No |
| 45365 | Snord1c  | 0.0000 | No |
| 45366 | Snord2   | 0.0000 | No |
| 45367 | Snord21  | 0.0000 | No |
| 45368 | Snord22  | 0.0000 | No |
| 45369 | Snord23  | 0.0000 | No |
| 45370 | Snord32a | 0.0000 | No |
| 45371 | Snord33  | 0.0000 | No |
| 45372 | Snord34  | 0.0000 | No |
| 45373 | Snord35a | 0.0000 | No |
| 45374 | Snord35b | 0.0000 | No |
| 45375 | Snord37  | 0.0000 | No |
| 45376 | Snord38a | 0.0000 | No |
| 45377 | Snord42a | 0.0000 | No |
| 45378 | Snord42b | 0.0000 | No |
| 45379 | Snord43  | 0.0000 | No |
| 45380 | Snord45b | 0.0000 | No |
| 45381 | Snord45c | 0.0000 | No |
| 45382 | Snord47  | 0.0000 | No |
| 45383 | Snord49a | 0.0000 | No |
| 45384 | Snord49b | 0.0000 | No |
| 45385 | Snord4a  | 0.0000 | No |
| 45386 | Snord50a | 0.0000 | No |
| 45387 | Snord50b | 0.0000 | No |
| 45388 | Snord52  | 0.0000 | No |
| 45389 | Snord53  | 0.0000 | No |
| 45390 | Snord55  | 0.0000 | No |
| 45391 | Snord57  | 0.0000 | No |
| 45392 | Snord58b | 0.0000 | No |
| 45393 | Snord59a | 0.0000 | No |
| 45394 | Snord60  | 0.0000 | No |
| 45395 | Snord64  | 0.0000 | No |
| 45396 | Snord65  | 0.0000 | No |
| 45397 | Snord66  | 0.0000 | No |
| 45398 | Snord67  | 0.0000 | No |
| 45399 | Snord68  | 0.0000 | No |

|       |            |        |    |
|-------|------------|--------|----|
| 45400 | Snord69    | 0.0000 | No |
| 45401 | Snord7     | 0.0000 | No |
| 45402 | Snord70    | 0.0000 | No |
| 45403 | Snord71    | 0.0000 | No |
| 45404 | Snord72    | 0.0000 | No |
| 45405 | Snord73a   | 0.0000 | No |
| 45406 | Snord78    | 0.0000 | No |
| 45407 | Snord8     | 0.0000 | No |
| 45408 | Snord80    | 0.0000 | No |
| 45409 | Snord82    | 0.0000 | No |
| 45410 | Snord83b   | 0.0000 | No |
| 45411 | Snord85    | 0.0000 | No |
| 45412 | Snord87    | 0.0000 | No |
| 45413 | Snord88a   | 0.0000 | No |
| 45414 | Snord89    | 0.0000 | No |
| 45415 | Snord90    | 0.0000 | No |
| 45416 | Snord91a   | 0.0000 | No |
| 45417 | Snord92    | 0.0000 | No |
| 45418 | Snord93    | 0.0000 | No |
| 45419 | Snord95    | 0.0000 | No |
| 45420 | Snord96a   | 0.0000 | No |
| 45421 | Snord98    | 0.0000 | No |
| 45422 | Snord99    | 0.0000 | No |
| 45423 | Snph       | 0.0000 | No |
| 45424 | Snrk       | 0.0000 | No |
| 45425 | Snrnp200   | 0.0000 | No |
| 45426 | Snrnp25    | 0.0000 | No |
| 45427 | Snrnp27    | 0.0000 | No |
| 45428 | Snrnp35    | 0.0000 | No |
| 45429 | Snrnp40    | 0.0000 | No |
| 45430 | Snrnp48    | 0.0000 | No |
| 45431 | Snrnp70    | 0.0000 | No |
| 45432 | Snrplc-ps1 | 0.0000 | No |
| 45433 | Snrplc-ps2 | 0.0000 | No |
| 45434 | Snrpa      | 0.0000 | No |
| 45435 | Snrpa1     | 0.0000 | No |
| 45436 | Snrpb      | 0.0000 | No |
| 45437 | Snrpb2     | 0.0000 | No |
| 45438 | Snrpc      | 0.0000 | No |
| 45439 | Snrpd1     | 0.0000 | No |
| 45440 | Snrpd2     | 0.0000 | No |
| 45441 | Snrpd3     | 0.0000 | No |
| 45442 | Snrpe      | 0.0000 | No |
| 45443 | Snrpert    | 0.0000 | No |
| 45444 | Snrpf      | 0.0000 | No |
| 45445 | Snrpg      | 0.0000 | No |

|       |       |        |    |
|-------|-------|--------|----|
| 45446 | Snrpn | 0.0000 | No |
| 45447 | Snta1 | 0.0000 | No |
| 45448 | Sntb1 | 0.0000 | No |
| 45449 | Sntb2 | 0.0000 | No |
| 45450 | Sntg1 | 0.0000 | No |
| 45451 | Sntg2 | 0.0000 | No |
| 45452 | Sntn  | 0.0000 | No |
| 45453 | Snupn | 0.0000 | No |
| 45454 | Snurf | 0.0000 | No |
| 45455 | Snw1  | 0.0000 | No |
| 45456 | Snx1  | 0.0000 | No |
| 45457 | Snx10 | 0.0000 | No |
| 45458 | Snx11 | 0.0000 | No |
| 45459 | Snx12 | 0.0000 | No |
| 45460 | Snx13 | 0.0000 | No |
| 45461 | Snx14 | 0.0000 | No |
| 45462 | Snx15 | 0.0000 | No |
| 45463 | Snx16 | 0.0000 | No |
| 45464 | Snx17 | 0.0000 | No |
| 45465 | Snx18 | 0.0000 | No |
| 45466 | Snx19 | 0.0000 | No |
| 45467 | Snx2  | 0.0000 | No |
| 45468 | Snx20 | 0.0000 | No |
| 45469 | Snx21 | 0.0000 | No |
| 45470 | Snx22 | 0.0000 | No |
| 45471 | Snx24 | 0.0000 | No |
| 45472 | Snx25 | 0.0000 | No |
| 45473 | Snx27 | 0.0000 | No |
| 45474 | Snx29 | 0.0000 | No |
| 45475 | Snx3  | 0.0000 | No |
| 45476 | Snx31 | 0.0000 | No |
| 45477 | Snx32 | 0.0000 | No |
| 45478 | Snx33 | 0.0000 | No |
| 45479 | Snx4  | 0.0000 | No |
| 45480 | Snx5  | 0.0000 | No |
| 45481 | Snx6  | 0.0000 | No |
| 45482 | Snx7  | 0.0000 | No |
| 45483 | Soat2 | 0.0000 | No |
| 45484 | Socs1 | 0.0000 | No |
| 45485 | Socs2 | 0.0000 | No |
| 45486 | Socs3 | 0.0000 | No |
| 45487 | Socs4 | 0.0000 | No |
| 45488 | Socs5 | 0.0000 | No |
| 45489 | Socs6 | 0.0000 | No |
| 45490 | Socs7 | 0.0000 | No |
| 45491 | Sod1  | 0.0000 | No |

|       |          |        |    |
|-------|----------|--------|----|
| 45492 | Sod2     | 0.0000 | No |
| 45493 | Sod3     | 0.0000 | No |
| 45494 | Soga1    | 0.0000 | No |
| 45495 | Soga3    | 0.0000 | No |
| 45496 | Sohlh2   | 0.0000 | No |
| 45497 | Son      | 0.0000 | No |
| 45498 | Sorbs1   | 0.0000 | No |
| 45499 | Sorbs2os | 0.0000 | No |
| 45500 | Sorbs3   | 0.0000 | No |
| 45501 | Sorcs1   | 0.0000 | No |
| 45502 | Sorcs2   | 0.0000 | No |
| 45503 | Sorcs3   | 0.0000 | No |
| 45504 | Sord     | 0.0000 | No |
| 45505 | Sorl1    | 0.0000 | No |
| 45506 | Sort1    | 0.0000 | No |
| 45507 | Sos1     | 0.0000 | No |
| 45508 | Sos2     | 0.0000 | No |
| 45509 | Sostdc1  | 0.0000 | No |
| 45510 | Sowaha   | 0.0000 | No |
| 45511 | Sowahb   | 0.0000 | No |
| 45512 | Sowahc   | 0.0000 | No |
| 45513 | Sowahd   | 0.0000 | No |
| 45514 | Sox1     | 0.0000 | No |
| 45515 | Sox10    | 0.0000 | No |
| 45516 | Sox11    | 0.0000 | No |
| 45517 | Sox12    | 0.0000 | No |
| 45518 | Sox17    | 0.0000 | No |
| 45519 | Sox18    | 0.0000 | No |
| 45520 | Sox2     | 0.0000 | No |
| 45521 | Sox21    | 0.0000 | No |
| 45522 | Sox2ot   | 0.0000 | No |
| 45523 | Sox3     | 0.0000 | No |
| 45524 | Sox30    | 0.0000 | No |
| 45525 | Sox4     | 0.0000 | No |
| 45526 | Sox6     | 0.0000 | No |
| 45527 | Sox6os   | 0.0000 | No |
| 45528 | Sox7     | 0.0000 | No |
| 45529 | Sox8     | 0.0000 | No |
| 45530 | Sox9     | 0.0000 | No |
| 45531 | Sp1      | 0.0000 | No |
| 45532 | Sp100    | 0.0000 | No |
| 45533 | Sp110    | 0.0000 | No |
| 45534 | Sp140    | 0.0000 | No |
| 45535 | Sp2      | 0.0000 | No |
| 45536 | Sp3      | 0.0000 | No |
| 45537 | Sp4      | 0.0000 | No |

|       |            |        |    |
|-------|------------|--------|----|
| 45538 | Sp5        | 0.0000 | No |
| 45539 | Sp6        | 0.0000 | No |
| 45540 | Sp7        | 0.0000 | No |
| 45541 | Sp8        | 0.0000 | No |
| 45542 | Sp9        | 0.0000 | No |
| 45543 | Spa17      | 0.0000 | No |
| 45544 | Spaca1     | 0.0000 | No |
| 45545 | Spaca4     | 0.0000 | No |
| 45546 | Spaca6     | 0.0000 | No |
| 45547 | Spag1      | 0.0000 | No |
| 45548 | Spag11a    | 0.0000 | No |
| 45549 | Spag11b    | 0.0000 | No |
| 45550 | Spag16     | 0.0000 | No |
| 45551 | Spag17     | 0.0000 | No |
| 45552 | Spag17os   | 0.0000 | No |
| 45553 | Spag4      | 0.0000 | No |
| 45554 | Spag5      | 0.0000 | No |
| 45555 | Spag6      | 0.0000 | No |
| 45556 | Spag6l     | 0.0000 | No |
| 45557 | Spag7      | 0.0000 | No |
| 45558 | Spag8      | 0.0000 | No |
| 45559 | Spag9      | 0.0000 | No |
| 45560 | Spanxn4    | 0.0000 | No |
| 45561 | Sparc      | 0.0000 | No |
| 45562 | Spare11    | 0.0000 | No |
| 45563 | Spast      | 0.0000 | No |
| 45564 | Spata1     | 0.0000 | No |
| 45565 | Spata16    | 0.0000 | No |
| 45566 | Spata17    | 0.0000 | No |
| 45567 | Spata18    | 0.0000 | No |
| 45568 | Spata2     | 0.0000 | No |
| 45569 | Spata20    | 0.0000 | No |
| 45570 | Spata21    | 0.0000 | No |
| 45571 | Spata22    | 0.0000 | No |
| 45572 | Spata24    | 0.0000 | No |
| 45573 | Spata25    | 0.0000 | No |
| 45574 | Spata21    | 0.0000 | No |
| 45575 | Spata3     | 0.0000 | No |
| 45576 | Spata31    | 0.0000 | No |
| 45577 | Spata31d1a | 0.0000 | No |
| 45578 | Spata31d1b | 0.0000 | No |
| 45579 | Spata31d1c | 0.0000 | No |
| 45580 | Spata31d1d | 0.0000 | No |
| 45581 | Spata32    | 0.0000 | No |
| 45582 | Spata33    | 0.0000 | No |
| 45583 | Spata4     | 0.0000 | No |

|       |            |        |    |
|-------|------------|--------|----|
| 45584 | Spata45    | 0.0000 | No |
| 45585 | Spata5     | 0.0000 | No |
| 45586 | Spata511   | 0.0000 | No |
| 45587 | Spata6     | 0.0000 | No |
| 45588 | Spata7     | 0.0000 | No |
| 45589 | Spata9     | 0.0000 | No |
| 45590 | Spatc1     | 0.0000 | No |
| 45591 | Spatc11    | 0.0000 | No |
| 45592 | Spats1     | 0.0000 | No |
| 45593 | Spats2     | 0.0000 | No |
| 45594 | Spats21    | 0.0000 | No |
| 45595 | Spc24      | 0.0000 | No |
| 45596 | Spc25      | 0.0000 | No |
| 45597 | Spcs1      | 0.0000 | No |
| 45598 | Spcs2      | 0.0000 | No |
| 45599 | Spcs2-ps   | 0.0000 | No |
| 45600 | Spcs3      | 0.0000 | No |
| 45601 | Spdl1      | 0.0000 | No |
| 45602 | Spdya      | 0.0000 | No |
| 45603 | Spdye4a    | 0.0000 | No |
| 45604 | Spdye4b    | 0.0000 | No |
| 45605 | Spdye4c    | 0.0000 | No |
| 45606 | Specc1     | 0.0000 | No |
| 45607 | Specc11    | 0.0000 | No |
| 45608 | Speer1     | 0.0000 | No |
| 45609 | Speer2     | 0.0000 | No |
| 45610 | Speer3     | 0.0000 | No |
| 45611 | Speer4b    | 0.0000 | No |
| 45612 | Speer4c    | 0.0000 | No |
| 45613 | Speer4cos  | 0.0000 | No |
| 45614 | Speer4d    | 0.0000 | No |
| 45615 | Speer4e    | 0.0000 | No |
| 45616 | Speer4f1   | 0.0000 | No |
| 45617 | Speer4f2   | 0.0000 | No |
| 45618 | Speer5-ps1 | 0.0000 | No |
| 45619 | Speer6-ps1 | 0.0000 | No |
| 45620 | Speer9-ps1 | 0.0000 | No |
| 45621 | Spf1       | 0.0000 | No |
| 45622 | Spf2       | 0.0000 | No |
| 45623 | Speg       | 0.0000 | No |
| 45624 | Spem1      | 0.0000 | No |
| 45625 | Spem       | 0.0000 | No |
| 45626 | Spesp1     | 0.0000 | No |
| 45627 | Spg11      | 0.0000 | No |
| 45628 | Spg20      | 0.0000 | No |
| 45629 | Spg21      | 0.0000 | No |



|       |           |        |    |
|-------|-----------|--------|----|
| 45630 | Spg7      | 0.0000 | No |
| 45631 | Sphk2     | 0.0000 | No |
| 45632 | Sphkap    | 0.0000 | No |
| 45633 | Spic      | 0.0000 | No |
| 45634 | Spice1    | 0.0000 | No |
| 45635 | Spidr     | 0.0000 | No |
| 45636 | Spin1     | 0.0000 | No |
| 45637 | Spin2c    | 0.0000 | No |
| 45638 | Spin2d    | 0.0000 | No |
| 45639 | Spin2e    | 0.0000 | No |
| 45640 | Spin2f    | 0.0000 | No |
| 45641 | Spin2g    | 0.0000 | No |
| 45642 | Spin2-ps1 | 0.0000 | No |
| 45643 | Spin2-ps2 | 0.0000 | No |
| 45644 | Spin2-ps3 | 0.0000 | No |
| 45645 | Spin2-ps4 | 0.0000 | No |
| 45646 | Spin2-ps6 | 0.0000 | No |
| 45647 | Spin3-ps  | 0.0000 | No |
| 45648 | Spin4     | 0.0000 | No |
| 45649 | Spink10   | 0.0000 | No |
| 45650 | Spink11   | 0.0000 | No |
| 45651 | Spink12   | 0.0000 | No |
| 45652 | Spink13   | 0.0000 | No |
| 45653 | Spink2    | 0.0000 | No |
| 45654 | Spink4    | 0.0000 | No |
| 45655 | Spink5    | 0.0000 | No |
| 45656 | Spink6    | 0.0000 | No |
| 45657 | Spink7    | 0.0000 | No |
| 45658 | Spink8    | 0.0000 | No |
| 45659 | Spink1    | 0.0000 | No |
| 45660 | Spint1    | 0.0000 | No |
| 45661 | Spint2    | 0.0000 | No |
| 45662 | Spint3    | 0.0000 | No |
| 45663 | Spire1    | 0.0000 | No |
| 45664 | Spire2    | 0.0000 | No |
| 45665 | Spn       | 0.0000 | No |
| 45666 | Spns1     | 0.0000 | No |
| 45667 | Spns2     | 0.0000 | No |
| 45668 | Spns3     | 0.0000 | No |
| 45669 | Spo11     | 0.0000 | No |
| 45670 | Spocd1    | 0.0000 | No |
| 45671 | Spock1    | 0.0000 | No |
| 45672 | Spock3    | 0.0000 | No |
| 45673 | Spon1     | 0.0000 | No |
| 45674 | Spop      | 0.0000 | No |
| 45675 | Spopl     | 0.0000 | No |

|       |           |        |    |
|-------|-----------|--------|----|
| 45676 | Spout1    | 0.0000 | No |
| 45677 | Sspl2a    | 0.0000 | No |
| 45678 | Sspl2c    | 0.0000 | No |
| 45679 | Sspl3     | 0.0000 | No |
| 45680 | Spr       | 0.0000 | No |
| 45681 | Spred1    | 0.0000 | No |
| 45682 | Spred2    | 0.0000 | No |
| 45683 | Spred3    | 0.0000 | No |
| 45684 | Sprn      | 0.0000 | No |
| 45685 | Spr-ps1   | 0.0000 | No |
| 45686 | Sprr1a    | 0.0000 | No |
| 45687 | Sprr1b    | 0.0000 | No |
| 45688 | Sprr2a1   | 0.0000 | No |
| 45689 | Sprr2a2   | 0.0000 | No |
| 45690 | Sprr2c-ps | 0.0000 | No |
| 45691 | Sprr2d    | 0.0000 | No |
| 45692 | Sprr2e    | 0.0000 | No |
| 45693 | Sprr2f    | 0.0000 | No |
| 45694 | Sprr2g    | 0.0000 | No |
| 45695 | Sprr2h    | 0.0000 | No |
| 45696 | Sprr2i    | 0.0000 | No |
| 45697 | Sprr2j-ps | 0.0000 | No |
| 45698 | Sprr2k    | 0.0000 | No |
| 45699 | Sprr3     | 0.0000 | No |
| 45700 | Sprr4     | 0.0000 | No |
| 45701 | Sprtn     | 0.0000 | No |
| 45702 | Spry1     | 0.0000 | No |
| 45703 | Spry3     | 0.0000 | No |
| 45704 | Spryd3    | 0.0000 | No |
| 45705 | Spryd4    | 0.0000 | No |
| 45706 | Spryd7    | 0.0000 | No |
| 45707 | Spsb1     | 0.0000 | No |
| 45708 | Spsb3     | 0.0000 | No |
| 45709 | Spsb4     | 0.0000 | No |
| 45710 | Spta1     | 0.0000 | No |
| 45711 | Sptan1    | 0.0000 | No |
| 45712 | Sptb      | 0.0000 | No |
| 45713 | Sptbn1    | 0.0000 | No |
| 45714 | Sptbn2    | 0.0000 | No |
| 45715 | Sptbn4    | 0.0000 | No |
| 45716 | Sptbn5    | 0.0000 | No |
| 45717 | Sptlc1    | 0.0000 | No |
| 45718 | Sptlc2    | 0.0000 | No |
| 45719 | Sptlc3    | 0.0000 | No |
| 45720 | Sptssa    | 0.0000 | No |
| 45721 | Spx       | 0.0000 | No |

|       |          |        |    |
|-------|----------|--------|----|
| 45722 | Sqle     | 0.0000 | No |
| 45723 | Sqrdl    | 0.0000 | No |
| 45724 | Sra1     | 0.0000 | No |
| 45725 | Srbd1    | 0.0000 | No |
| 45726 | Src      | 0.0000 | No |
| 45727 | Srcap    | 0.0000 | No |
| 45728 | Srcin1   | 0.0000 | No |
| 45729 | Srd5a1   | 0.0000 | No |
| 45730 | Srd5a2   | 0.0000 | No |
| 45731 | Srd5a3   | 0.0000 | No |
| 45732 | Srebf1   | 0.0000 | No |
| 45733 | Srebf2   | 0.0000 | No |
| 45734 | Srek1    | 0.0000 | No |
| 45735 | Srek1ip1 | 0.0000 | No |
| 45736 | Srf      | 0.0000 | No |
| 45737 | Srfbp1   | 0.0000 | No |
| 45738 | Srgap1   | 0.0000 | No |
| 45739 | Srgap2   | 0.0000 | No |
| 45740 | Srgn     | 0.0000 | No |
| 45741 | Sri      | 0.0000 | No |
| 45742 | Srl      | 0.0000 | No |
| 45743 | Srm      | 0.0000 | No |
| 45744 | Srms     | 0.0000 | No |
| 45745 | Srp14    | 0.0000 | No |
| 45746 | Srp19    | 0.0000 | No |
| 45747 | Srp54a   | 0.0000 | No |
| 45748 | Srp54b   | 0.0000 | No |
| 45749 | Srp68    | 0.0000 | No |
| 45750 | Srp72    | 0.0000 | No |
| 45751 | Srp9     | 0.0000 | No |
| 45752 | Srpk1    | 0.0000 | No |
| 45753 | Srpk2    | 0.0000 | No |
| 45754 | Srpr     | 0.0000 | No |
| 45755 | Srprb    | 0.0000 | No |
| 45756 | Srpx     | 0.0000 | No |
| 45757 | Srpx2    | 0.0000 | No |
| 45758 | Srr      | 0.0000 | No |
| 45759 | Srrd     | 0.0000 | No |
| 45760 | Srrm1    | 0.0000 | No |
| 45761 | Srrm2    | 0.0000 | No |
| 45762 | Srrm3    | 0.0000 | No |
| 45763 | Srrm3os  | 0.0000 | No |
| 45764 | Srrm4    | 0.0000 | No |
| 45765 | Srrm4os  | 0.0000 | No |
| 45766 | Srrt     | 0.0000 | No |
| 45767 | Srsf10   | 0.0000 | No |

|       |        |        |    |
|-------|--------|--------|----|
| 45768 | Srsf11 | 0.0000 | No |
| 45769 | Srsf12 | 0.0000 | No |
| 45770 | Srsf2  | 0.0000 | No |
| 45771 | Srsf3  | 0.0000 | No |
| 45772 | Srsf4  | 0.0000 | No |
| 45773 | Srsf5  | 0.0000 | No |
| 45774 | Srsf6  | 0.0000 | No |
| 45775 | Srsf7  | 0.0000 | No |
| 45776 | Srsf9  | 0.0000 | No |
| 45777 | Srsx   | 0.0000 | No |
| 45778 | Srsy   | 0.0000 | No |
| 45779 | Sry    | 0.0000 | No |
| 45780 | Ss1811 | 0.0000 | No |
| 45781 | Ssb    | 0.0000 | No |
| 45782 | Ssbp1  | 0.0000 | No |
| 45783 | Ssbp2  | 0.0000 | No |
| 45784 | Ssbp3  | 0.0000 | No |
| 45785 | Ssbp4  | 0.0000 | No |
| 45786 | Ssc4d  | 0.0000 | No |
| 45787 | Ssc5d  | 0.0000 | No |
| 45788 | Ssfa2  | 0.0000 | No |
| 45789 | Ssh1   | 0.0000 | No |
| 45790 | Ssh3   | 0.0000 | No |
| 45791 | Ssna1  | 0.0000 | No |
| 45792 | Sspn   | 0.0000 | No |
| 45793 | Sspnos | 0.0000 | No |
| 45794 | Sspo   | 0.0000 | No |
| 45795 | Ssr1   | 0.0000 | No |
| 45796 | Ssr2   | 0.0000 | No |
| 45797 | Ssr3   | 0.0000 | No |
| 45798 | Ssr4   | 0.0000 | No |
| 45799 | Ssrp1  | 0.0000 | No |
| 45800 | Sssca1 | 0.0000 | No |
| 45801 | Sst    | 0.0000 | No |
| 45802 | Sstr1  | 0.0000 | No |
| 45803 | Sstr2  | 0.0000 | No |
| 45804 | Sstr3  | 0.0000 | No |
| 45805 | Sstr4  | 0.0000 | No |
| 45806 | Ssty1  | 0.0000 | No |
| 45807 | Ssty2  | 0.0000 | No |
| 45808 | Ssu2   | 0.0000 | No |
| 45809 | Ssu72  | 0.0000 | No |
| 45810 | Ssx2ip | 0.0000 | No |
| 45811 | Ssx9   | 0.0000 | No |
| 45812 | Ssxa1  | 0.0000 | No |
| 45813 | Ssxb10 | 0.0000 | No |

|       |            |        |    |
|-------|------------|--------|----|
| 45814 | Ssxb2      | 0.0000 | No |
| 45815 | Ssxb3      | 0.0000 | No |
| 45816 | Ssxb5      | 0.0000 | No |
| 45817 | Ssxb6      | 0.0000 | No |
| 45818 | St13       | 0.0000 | No |
| 45819 | St14       | 0.0000 | No |
| 45820 | St18       | 0.0000 | No |
| 45821 | St3gal1    | 0.0000 | No |
| 45822 | St3gal2    | 0.0000 | No |
| 45823 | St3gal3    | 0.0000 | No |
| 45824 | St3gal4    | 0.0000 | No |
| 45825 | St3gal6    | 0.0000 | No |
| 45826 | St6gal2    | 0.0000 | No |
| 45827 | St6galnac1 | 0.0000 | No |
| 45828 | St6galnac2 | 0.0000 | No |
| 45829 | St6galnac3 | 0.0000 | No |
| 45830 | St6galnac4 | 0.0000 | No |
| 45831 | St6galnac6 | 0.0000 | No |
| 45832 | St7        | 0.0000 | No |
| 45833 | St7l       | 0.0000 | No |
| 45834 | St8sia1    | 0.0000 | No |
| 45835 | St8sia2    | 0.0000 | No |
| 45836 | St8sia3    | 0.0000 | No |
| 45837 | St8sia3os  | 0.0000 | No |
| 45838 | St8sia5    | 0.0000 | No |
| 45839 | St8sia6    | 0.0000 | No |
| 45840 | Stab1      | 0.0000 | No |
| 45841 | Stab2      | 0.0000 | No |
| 45842 | Stac       | 0.0000 | No |
| 45843 | Stac2      | 0.0000 | No |
| 45844 | Stac3      | 0.0000 | No |
| 45845 | Stag1      | 0.0000 | No |
| 45846 | Stag2      | 0.0000 | No |
| 45847 | Stag3      | 0.0000 | No |
| 45848 | Stam       | 0.0000 | No |
| 45849 | Stam2      | 0.0000 | No |
| 45850 | Stamp      | 0.0000 | No |
| 45851 | Stamp-ps1  | 0.0000 | No |
| 45852 | Stamos     | 0.0000 | No |
| 45853 | Stap1      | 0.0000 | No |
| 45854 | Stap2      | 0.0000 | No |
| 45855 | Star       | 0.0000 | No |
| 45856 | Stard10    | 0.0000 | No |
| 45857 | Stard13    | 0.0000 | No |
| 45858 | Stard3     | 0.0000 | No |
| 45859 | Stard3nl   | 0.0000 | No |

|       |           |        |    |
|-------|-----------|--------|----|
| 45860 | Stard4    | 0.0000 | No |
| 45861 | Stard5    | 0.0000 | No |
| 45862 | Stard6    | 0.0000 | No |
| 45863 | Stard7    | 0.0000 | No |
| 45864 | Stard8    | 0.0000 | No |
| 45865 | Stard9    | 0.0000 | No |
| 45866 | Stat1     | 0.0000 | No |
| 45867 | Stat2     | 0.0000 | No |
| 45868 | Stat3     | 0.0000 | No |
| 45869 | Stat4     | 0.0000 | No |
| 45870 | Stat5b    | 0.0000 | No |
| 45871 | Stau1     | 0.0000 | No |
| 45872 | Stau2     | 0.0000 | No |
| 45873 | Stc2      | 0.0000 | No |
| 45874 | Steap1    | 0.0000 | No |
| 45875 | Steap2    | 0.0000 | No |
| 45876 | Steap3    | 0.0000 | No |
| 45877 | Steap4    | 0.0000 | No |
| 45878 | Stfa2     | 0.0000 | No |
| 45879 | Stfa211   | 0.0000 | No |
| 45880 | Stil      | 0.0000 | No |
| 45881 | Stim1     | 0.0000 | No |
| 45882 | Stim2     | 0.0000 | No |
| 45883 | Stip1     | 0.0000 | No |
| 45884 | Stk10     | 0.0000 | No |
| 45885 | Stk11     | 0.0000 | No |
| 45886 | Stk11ip   | 0.0000 | No |
| 45887 | Stk16     | 0.0000 | No |
| 45888 | Stk17b    | 0.0000 | No |
| 45889 | Stk19     | 0.0000 | No |
| 45890 | Stk19-ps1 | 0.0000 | No |
| 45891 | Stk24     | 0.0000 | No |
| 45892 | Stk25     | 0.0000 | No |
| 45893 | Stk26     | 0.0000 | No |
| 45894 | Stk3      | 0.0000 | No |
| 45895 | Stk31     | 0.0000 | No |
| 45896 | Stk32a    | 0.0000 | No |
| 45897 | Stk32b    | 0.0000 | No |
| 45898 | Stk32c    | 0.0000 | No |
| 45899 | Stk33     | 0.0000 | No |
| 45900 | Stk35     | 0.0000 | No |
| 45901 | Stk36     | 0.0000 | No |
| 45902 | Stk38     | 0.0000 | No |
| 45903 | Stk38l    | 0.0000 | No |
| 45904 | Stk4      | 0.0000 | No |
| 45905 | Stk40     | 0.0000 | No |

|       |         |        |    |
|-------|---------|--------|----|
| 45906 | Stkld1  | 0.0000 | No |
| 45907 | Stk-ps1 | 0.0000 | No |
| 45908 | Stk-ps2 | 0.0000 | No |
| 45909 | Stmn1   | 0.0000 | No |
| 45910 | Stmn2   | 0.0000 | No |
| 45911 | Stmn3   | 0.0000 | No |
| 45912 | Stmn4   | 0.0000 | No |
| 45913 | Stmnd1  | 0.0000 | No |
| 45914 | Stom    | 0.0000 | No |
| 45915 | Stoml1  | 0.0000 | No |
| 45916 | Stoml2  | 0.0000 | No |
| 45917 | Stoml3  | 0.0000 | No |
| 45918 | Ston1   | 0.0000 | No |
| 45919 | Ston2   | 0.0000 | No |
| 45920 | Stox1   | 0.0000 | No |
| 45921 | Stox2   | 0.0000 | No |
| 45922 | Stpg1   | 0.0000 | No |
| 45923 | Stpg2   | 0.0000 | No |
| 45924 | Stpg3   | 0.0000 | No |
| 45925 | Stpg4   | 0.0000 | No |
| 45926 | Stra13  | 0.0000 | No |
| 45927 | Stra6   | 0.0000 | No |
| 45928 | Stra6l  | 0.0000 | No |
| 45929 | Stra8   | 0.0000 | No |
| 45930 | Strada  | 0.0000 | No |
| 45931 | Stradb  | 0.0000 | No |
| 45932 | Strap   | 0.0000 | No |
| 45933 | Strbp   | 0.0000 | No |
| 45934 | Strc    | 0.0000 | No |
| 45935 | Strip1  | 0.0000 | No |
| 45936 | Strip2  | 0.0000 | No |
| 45937 | Strn    | 0.0000 | No |
| 45938 | Strn3   | 0.0000 | No |
| 45939 | Strn4   | 0.0000 | No |
| 45940 | Stt3a   | 0.0000 | No |
| 45941 | Stt3b   | 0.0000 | No |
| 45942 | Stub1   | 0.0000 | No |
| 45943 | Stum    | 0.0000 | No |
| 45944 | Stx11   | 0.0000 | No |
| 45945 | Stx12   | 0.0000 | No |
| 45946 | Stx16   | 0.0000 | No |
| 45947 | Stx17   | 0.0000 | No |
| 45948 | Stx18   | 0.0000 | No |
| 45949 | Stx19   | 0.0000 | No |
| 45950 | Stx1a   | 0.0000 | No |
| 45951 | Stx1b   | 0.0000 | No |

|       |             |        |    |
|-------|-------------|--------|----|
| 45952 | Stx2        | 0.0000 | No |
| 45953 | Stx3        | 0.0000 | No |
| 45954 | Stx4a       | 0.0000 | No |
| 45955 | Stx5a       | 0.0000 | No |
| 45956 | Stx6        | 0.0000 | No |
| 45957 | Stx7        | 0.0000 | No |
| 45958 | Stx8        | 0.0000 | No |
| 45959 | Stxbp1      | 0.0000 | No |
| 45960 | Stxbp2      | 0.0000 | No |
| 45961 | Stxbp3      | 0.0000 | No |
| 45962 | Stxbp3-ps   | 0.0000 | No |
| 45963 | Stxbp4      | 0.0000 | No |
| 45964 | Stxbp5      | 0.0000 | No |
| 45965 | Stxbp5l     | 0.0000 | No |
| 45966 | Stxbp6      | 0.0000 | No |
| 45967 | Styk1       | 0.0000 | No |
| 45968 | Styx        | 0.0000 | No |
| 45969 | Styx1l      | 0.0000 | No |
| 45970 | Sub1        | 0.0000 | No |
| 45971 | Sucla2      | 0.0000 | No |
| 45972 | Suclg1      | 0.0000 | No |
| 45973 | Suclg2      | 0.0000 | No |
| 45974 | Suco        | 0.0000 | No |
| 45975 | Suds3       | 0.0000 | No |
| 45976 | Sufu        | 0.0000 | No |
| 45977 | Sugct       | 0.0000 | No |
| 45978 | Sugp1       | 0.0000 | No |
| 45979 | Sugp2       | 0.0000 | No |
| 45980 | Sugt1       | 0.0000 | No |
| 45981 | Sulf1       | 0.0000 | No |
| 45982 | Sulf2       | 0.0000 | No |
| 45983 | Sult1a1     | 0.0000 | No |
| 45984 | Sult1b1     | 0.0000 | No |
| 45985 | Sult1c2     | 0.0000 | No |
| 45986 | Sult1c2-ps1 | 0.0000 | No |
| 45987 | Sult1c2-ps2 | 0.0000 | No |
| 45988 | Sult1d1     | 0.0000 | No |
| 45989 | Sult1e1     | 0.0000 | No |
| 45990 | Sult2a1     | 0.0000 | No |
| 45991 | Sult2a2     | 0.0000 | No |
| 45992 | Sult2a4     | 0.0000 | No |
| 45993 | Sult2a5     | 0.0000 | No |
| 45994 | Sult2a6     | 0.0000 | No |
| 45995 | Sult2a7     | 0.0000 | No |
| 45996 | Sult2a8     | 0.0000 | No |
| 45997 | Sult2a-ps1  | 0.0000 | No |



|       |            |        |    |
|-------|------------|--------|----|
| 45998 | Sult2a-ps2 | 0.0000 | No |
| 45999 | Sult2a-ps3 | 0.0000 | No |
| 46000 | Sult2a-ps4 | 0.0000 | No |
| 46001 | Sult2b1    | 0.0000 | No |
| 46002 | Sult3a1    | 0.0000 | No |
| 46003 | Sult3a2    | 0.0000 | No |
| 46004 | Sult4a1    | 0.0000 | No |
| 46005 | Sult5a1    | 0.0000 | No |
| 46006 | Sult6b1    | 0.0000 | No |
| 46007 | Sult6b2    | 0.0000 | No |
| 46008 | Sumf1      | 0.0000 | No |
| 46009 | Sumf2      | 0.0000 | No |
| 46010 | Sumo1      | 0.0000 | No |
| 46011 | Sumo2      | 0.0000 | No |
| 46012 | Sumo3      | 0.0000 | No |
| 46013 | Sun1       | 0.0000 | No |
| 46014 | Sun2       | 0.0000 | No |
| 46015 | Sun3       | 0.0000 | No |
| 46016 | Sun5       | 0.0000 | No |
| 46017 | Suox       | 0.0000 | No |
| 46018 | Supt16     | 0.0000 | No |
| 46019 | Supt20     | 0.0000 | No |
| 46020 | Supt20-ps  | 0.0000 | No |
| 46021 | Supt3      | 0.0000 | No |
| 46022 | Supt4a     | 0.0000 | No |
| 46023 | Supt6      | 0.0000 | No |
| 46024 | Supt7l     | 0.0000 | No |
| 46025 | Supv3l1    | 0.0000 | No |
| 46026 | Surf1      | 0.0000 | No |
| 46027 | Surf2      | 0.0000 | No |
| 46028 | Surf4      | 0.0000 | No |
| 46029 | Surf6      | 0.0000 | No |
| 46030 | Susd1      | 0.0000 | No |
| 46031 | Susd2      | 0.0000 | No |
| 46032 | Susd3      | 0.0000 | No |
| 46033 | Susd4      | 0.0000 | No |
| 46034 | Susd5      | 0.0000 | No |
| 46035 | Susd6      | 0.0000 | No |
| 46036 | Suv39h1    | 0.0000 | No |
| 46037 | Suv39h2    | 0.0000 | No |
| 46038 | Suz12      | 0.0000 | No |
| 46039 | Sv2a       | 0.0000 | No |
| 46040 | Sv2b       | 0.0000 | No |
| 46041 | Sv2c       | 0.0000 | No |
| 46042 | Sva        | 0.0000 | No |
| 46043 | Sval1      | 0.0000 | No |

|       |           |        |    |
|-------|-----------|--------|----|
| 46044 | Sval2     | 0.0000 | No |
| 46045 | Sval3     | 0.0000 | No |
| 46046 | Svbp      | 0.0000 | No |
| 46047 | Svep1     | 0.0000 | No |
| 46048 | Svet1     | 0.0000 | No |
| 46049 | Svip      | 0.0000 | No |
| 46050 | Svop      | 0.0000 | No |
| 46051 | Svopl     | 0.0000 | No |
| 46052 | Svs1      | 0.0000 | No |
| 46053 | Svs2      | 0.0000 | No |
| 46054 | Svs3b     | 0.0000 | No |
| 46055 | Svs4      | 0.0000 | No |
| 46056 | Svs5      | 0.0000 | No |
| 46057 | Svs6      | 0.0000 | No |
| 46058 | Swap70    | 0.0000 | No |
| 46059 | Swi5      | 0.0000 | No |
| 46060 | Swsap1    | 0.0000 | No |
| 46061 | Swt1      | 0.0000 | No |
| 46062 | Syap1     | 0.0000 | No |
| 46063 | Sybu      | 0.0000 | No |
| 46064 | Syce1     | 0.0000 | No |
| 46065 | Syce11    | 0.0000 | No |
| 46066 | Syce2     | 0.0000 | No |
| 46067 | Syce3     | 0.0000 | No |
| 46068 | Sycn      | 0.0000 | No |
| 46069 | Sycp1     | 0.0000 | No |
| 46070 | Sycp1-ps1 | 0.0000 | No |
| 46071 | Sycp2     | 0.0000 | No |
| 46072 | Sycp21    | 0.0000 | No |
| 46073 | Sycp3     | 0.0000 | No |
| 46074 | Syde1     | 0.0000 | No |
| 46075 | Syde2     | 0.0000 | No |
| 46076 | Syf2      | 0.0000 | No |
| 46077 | Sympk     | 0.0000 | No |
| 46078 | Syn1      | 0.0000 | No |
| 46079 | Syn2      | 0.0000 | No |
| 46080 | Syn3      | 0.0000 | No |
| 46081 | Syna      | 0.0000 | No |
| 46082 | Synb      | 0.0000 | No |
| 46083 | Sync      | 0.0000 | No |
| 46084 | Syncrip   | 0.0000 | No |
| 46085 | Syne1     | 0.0000 | No |
| 46086 | Syne2     | 0.0000 | No |
| 46087 | Syne3     | 0.0000 | No |
| 46088 | Syne4     | 0.0000 | No |
| 46089 | Syngap1   | 0.0000 | No |

|       |         |        |    |
|-------|---------|--------|----|
| 46090 | Syngr1  | 0.0000 | No |
| 46091 | Syngr2  | 0.0000 | No |
| 46092 | Syngr3  | 0.0000 | No |
| 46093 | Syngr4  | 0.0000 | No |
| 46094 | Synj1   | 0.0000 | No |
| 46095 | Synj2   | 0.0000 | No |
| 46096 | Synj2bp | 0.0000 | No |
| 46097 | Synm    | 0.0000 | No |
| 46098 | Synpo   | 0.0000 | No |
| 46099 | Synpo2  | 0.0000 | No |
| 46100 | Synpo2l | 0.0000 | No |
| 46101 | Synpr   | 0.0000 | No |
| 46102 | Synrg   | 0.0000 | No |
| 46103 | Syp     | 0.0000 | No |
| 46104 | Sypl    | 0.0000 | No |
| 46105 | Sypl2   | 0.0000 | No |
| 46106 | Sys1    | 0.0000 | No |
| 46107 | Syt1    | 0.0000 | No |
| 46108 | Syt10   | 0.0000 | No |
| 46109 | Syt11   | 0.0000 | No |
| 46110 | Syt12   | 0.0000 | No |
| 46111 | Syt13   | 0.0000 | No |
| 46112 | Syt14   | 0.0000 | No |
| 46113 | Syt15   | 0.0000 | No |
| 46114 | Syt16   | 0.0000 | No |
| 46115 | Syt17   | 0.0000 | No |
| 46116 | Syt2    | 0.0000 | No |
| 46117 | Syt3    | 0.0000 | No |
| 46118 | Syt4    | 0.0000 | No |
| 46119 | Syt5    | 0.0000 | No |
| 46120 | Syt6    | 0.0000 | No |
| 46121 | Syt7    | 0.0000 | No |
| 46122 | Syt9    | 0.0000 | No |
| 46123 | Sytl1   | 0.0000 | No |
| 46124 | Sytl2   | 0.0000 | No |
| 46125 | Sytl4   | 0.0000 | No |
| 46126 | Sytl5   | 0.0000 | No |
| 46127 | Syvn1   | 0.0000 | No |
| 46128 | Szrd1   | 0.0000 | No |
| 46129 | Szt2    | 0.0000 | No |
| 46130 | T       | 0.0000 | No |
| 46131 | T2      | 0.0000 | No |
| 46132 | Taar1   | 0.0000 | No |
| 46133 | Taar2   | 0.0000 | No |
| 46134 | Taar4   | 0.0000 | No |
| 46135 | Taar5   | 0.0000 | No |

|       |           |        |    |
|-------|-----------|--------|----|
| 46136 | Taar7a    | 0.0000 | No |
| 46137 | Taar7b    | 0.0000 | No |
| 46138 | Taar7c-ps | 0.0000 | No |
| 46139 | Taar7d    | 0.0000 | No |
| 46140 | Taar7e    | 0.0000 | No |
| 46141 | Taar8c    | 0.0000 | No |
| 46142 | Taar9     | 0.0000 | No |
| 46143 | Tab1      | 0.0000 | No |
| 46144 | Tab3      | 0.0000 | No |
| 46145 | Tac1      | 0.0000 | No |
| 46146 | Tac2      | 0.0000 | No |
| 46147 | Tac4      | 0.0000 | No |
| 46148 | Tacc1     | 0.0000 | No |
| 46149 | Tacc2     | 0.0000 | No |
| 46150 | Tacc3     | 0.0000 | No |
| 46151 | Tac01     | 0.0000 | No |
| 46152 | Tac01os   | 0.0000 | No |
| 46153 | Tacr1     | 0.0000 | No |
| 46154 | Tacr2     | 0.0000 | No |
| 46155 | Tacr3     | 0.0000 | No |
| 46156 | Tacstd2   | 0.0000 | No |
| 46157 | Tada1     | 0.0000 | No |
| 46158 | Tada2a    | 0.0000 | No |
| 46159 | Tada2b    | 0.0000 | No |
| 46160 | Tada3     | 0.0000 | No |
| 46161 | Taf1      | 0.0000 | No |
| 46162 | Taf10     | 0.0000 | No |
| 46163 | Taf11     | 0.0000 | No |
| 46164 | Taf12     | 0.0000 | No |
| 46165 | Taf13     | 0.0000 | No |
| 46166 | Taf15     | 0.0000 | No |
| 46167 | Taf1a     | 0.0000 | No |
| 46168 | Taf1b     | 0.0000 | No |
| 46169 | Taf1c     | 0.0000 | No |
| 46170 | Taf1d     | 0.0000 | No |
| 46171 | Taf2      | 0.0000 | No |
| 46172 | Taf3      | 0.0000 | No |
| 46173 | Taf4      | 0.0000 | No |
| 46174 | Taf4b     | 0.0000 | No |
| 46175 | Taf5      | 0.0000 | No |
| 46176 | Taf51     | 0.0000 | No |
| 46177 | Taf6      | 0.0000 | No |
| 46178 | Taf61     | 0.0000 | No |
| 46179 | Taf7      | 0.0000 | No |
| 46180 | Taf71     | 0.0000 | No |
| 46181 | Taf8      | 0.0000 | No |

|       |              |        |    |
|-------|--------------|--------|----|
| 46182 | Taf9         | 0.0000 | No |
| 46183 | Taf9b        | 0.0000 | No |
| 46184 | Tagap        | 0.0000 | No |
| 46185 | Tagap1       | 0.0000 | No |
| 46186 | Tagln        | 0.0000 | No |
| 46187 | Tagln2       | 0.0000 | No |
| 46188 | Tagln3       | 0.0000 | No |
| 46189 | Tal1         | 0.0000 | No |
| 46190 | Tal2         | 0.0000 | No |
| 46191 | Taldo1       | 0.0000 | No |
| 46192 | Tamm41       | 0.0000 | No |
| 46193 | Tanc2        | 0.0000 | No |
| 46194 | Tango2       | 0.0000 | No |
| 46195 | Tango6       | 0.0000 | No |
| 46196 | Tank         | 0.0000 | No |
| 46197 | Taok1        | 0.0000 | No |
| 46198 | Taok3        | 0.0000 | No |
| 46199 | Tap1         | 0.0000 | No |
| 46200 | Tap2         | 0.0000 | No |
| 46201 | Tapbp        | 0.0000 | No |
| 46202 | Tapbpl       | 0.0000 | No |
| 46203 | Tapt1        | 0.0000 | No |
| 46204 | Tarbp1       | 0.0000 | No |
| 46205 | Tarbp2       | 0.0000 | No |
| 46206 | Tardbp       | 0.0000 | No |
| 46207 | Tars         | 0.0000 | No |
| 46208 | Tars2        | 0.0000 | No |
| 46209 | Tarsl2       | 0.0000 | No |
| 46210 | Tas1r1       | 0.0000 | No |
| 46211 | Tas1r2       | 0.0000 | No |
| 46212 | Tas1r3       | 0.0000 | No |
| 46213 | Tas2r102     | 0.0000 | No |
| 46214 | Tas2r103     | 0.0000 | No |
| 46215 | Tas2r104     | 0.0000 | No |
| 46216 | Tas2r105     | 0.0000 | No |
| 46217 | Tas2r106     | 0.0000 | No |
| 46218 | Tas2r108     | 0.0000 | No |
| 46219 | Tas2r109     | 0.0000 | No |
| 46220 | Tas2r110     | 0.0000 | No |
| 46221 | Tas2r111-ps2 | 0.0000 | No |
| 46222 | Tas2r113     | 0.0000 | No |
| 46223 | Tas2r114     | 0.0000 | No |
| 46224 | Tas2r115     | 0.0000 | No |
| 46225 | Tas2r116     | 0.0000 | No |
| 46226 | Tas2r117     | 0.0000 | No |
| 46227 | Tas2r118     | 0.0000 | No |

|       |              |        |    |
|-------|--------------|--------|----|
| 46228 | Tas2r119     | 0.0000 | No |
| 46229 | Tas2r120     | 0.0000 | No |
| 46230 | Tas2r121     | 0.0000 | No |
| 46231 | Tas2r122     | 0.0000 | No |
| 46232 | Tas2r124     | 0.0000 | No |
| 46233 | Tas2r126     | 0.0000 | No |
| 46234 | Tas2r129     | 0.0000 | No |
| 46235 | Tas2r130     | 0.0000 | No |
| 46236 | Tas2r131     | 0.0000 | No |
| 46237 | Tas2r134     | 0.0000 | No |
| 46238 | Tas2r135     | 0.0000 | No |
| 46239 | Tas2r136     | 0.0000 | No |
| 46240 | Tas2r137     | 0.0000 | No |
| 46241 | Tas2r139     | 0.0000 | No |
| 46242 | Tas2r141-ps4 | 0.0000 | No |
| 46243 | Tas2r142-ps5 | 0.0000 | No |
| 46244 | Tas2r143     | 0.0000 | No |
| 46245 | Tas2r144     | 0.0000 | No |
| 46246 | Tas2r145-ps3 | 0.0000 | No |
| 46247 | Tas2r146-ps1 | 0.0000 | No |
| 46248 | Tasp1        | 0.0000 | No |
| 46249 | Tat          | 0.0000 | No |
| 46250 | Tatdn1       | 0.0000 | No |
| 46251 | Tatdn2       | 0.0000 | No |
| 46252 | Tatdn3       | 0.0000 | No |
| 46253 | Tax1bp1      | 0.0000 | No |
| 46254 | Tax1bp3      | 0.0000 | No |
| 46255 | Taz          | 0.0000 | No |
| 46256 | Tbata        | 0.0000 | No |
| 46257 | Tbc1d1       | 0.0000 | No |
| 46258 | Tbc1d10a     | 0.0000 | No |
| 46259 | Tbc1d10b     | 0.0000 | No |
| 46260 | Tbc1d10c     | 0.0000 | No |
| 46261 | Tbc1d12      | 0.0000 | No |
| 46262 | Tbc1d13      | 0.0000 | No |
| 46263 | Tbc1d14      | 0.0000 | No |
| 46264 | Tbc1d15      | 0.0000 | No |
| 46265 | Tbc1d16      | 0.0000 | No |
| 46266 | Tbc1d17      | 0.0000 | No |
| 46267 | Tbc1d19      | 0.0000 | No |
| 46268 | Tbc1d2       | 0.0000 | No |
| 46269 | Tbc1d20      | 0.0000 | No |
| 46270 | Tbc1d21      | 0.0000 | No |
| 46271 | Tbc1d22a     | 0.0000 | No |
| 46272 | Tbc1d22b     | 0.0000 | No |
| 46273 | Tbc1d22bos   | 0.0000 | No |

|       |         |        |    |
|-------|---------|--------|----|
| 46274 | Tbc1d23 | 0.0000 | No |
| 46275 | Tbc1d24 | 0.0000 | No |
| 46276 | Tbc1d25 | 0.0000 | No |
| 46277 | Tbc1d30 | 0.0000 | No |
| 46278 | Tbc1d31 | 0.0000 | No |
| 46279 | Tbc1d32 | 0.0000 | No |
| 46280 | Tbc1d5  | 0.0000 | No |
| 46281 | Tbc1d7  | 0.0000 | No |
| 46282 | Tbc1d8  | 0.0000 | No |
| 46283 | Tbc1d8b | 0.0000 | No |
| 46284 | Tbc1d9  | 0.0000 | No |
| 46285 | Tbc1d9b | 0.0000 | No |
| 46286 | Tbca    | 0.0000 | No |
| 46287 | Tbcb    | 0.0000 | No |
| 46288 | Tbcc    | 0.0000 | No |
| 46289 | Tbccd1  | 0.0000 | No |
| 46290 | Tbcd    | 0.0000 | No |
| 46291 | Tbce    | 0.0000 | No |
| 46292 | Tbcel   | 0.0000 | No |
| 46293 | Tbck    | 0.0000 | No |
| 46294 | Tbk1    | 0.0000 | No |
| 46295 | Tbkbp1  | 0.0000 | No |
| 46296 | Tbl1x   | 0.0000 | No |
| 46297 | Tbl1xr1 | 0.0000 | No |
| 46298 | Tbl2    | 0.0000 | No |
| 46299 | Tbl3    | 0.0000 | No |
| 46300 | Tbp     | 0.0000 | No |
| 46301 | Tbpl1   | 0.0000 | No |
| 46302 | Tbpl2   | 0.0000 | No |
| 46303 | Tbr1    | 0.0000 | No |
| 46304 | Tbrg4   | 0.0000 | No |
| 46305 | Tbx1    | 0.0000 | No |
| 46306 | Tbx10   | 0.0000 | No |
| 46307 | Tbx15   | 0.0000 | No |
| 46308 | Tbx18   | 0.0000 | No |
| 46309 | Tbx19   | 0.0000 | No |
| 46310 | Tbx2    | 0.0000 | No |
| 46311 | Tbx20   | 0.0000 | No |
| 46312 | Tbx21   | 0.0000 | No |
| 46313 | Tbx22   | 0.0000 | No |
| 46314 | Tbx3    | 0.0000 | No |
| 46315 | Tbx3os1 | 0.0000 | No |
| 46316 | Tbx3os2 | 0.0000 | No |
| 46317 | Tbx5    | 0.0000 | No |
| 46318 | Tbx6    | 0.0000 | No |
| 46319 | Tbxa2r  | 0.0000 | No |

|       |           |        |    |
|-------|-----------|--------|----|
| 46320 | Tbxas1    | 0.0000 | No |
| 46321 | Tcaf1     | 0.0000 | No |
| 46322 | Tcaf3     | 0.0000 | No |
| 46323 | Tcaim     | 0.0000 | No |
| 46324 | Tcam1     | 0.0000 | No |
| 46325 | Tcea1     | 0.0000 | No |
| 46326 | Tcea1-ps1 | 0.0000 | No |
| 46327 | Tcea2     | 0.0000 | No |
| 46328 | Tcea3     | 0.0000 | No |
| 46329 | Tceal1    | 0.0000 | No |
| 46330 | Tceal3    | 0.0000 | No |
| 46331 | Tceal5    | 0.0000 | No |
| 46332 | Tceal6    | 0.0000 | No |
| 46333 | Tceal7    | 0.0000 | No |
| 46334 | Tceal8    | 0.0000 | No |
| 46335 | Tceanc    | 0.0000 | No |
| 46336 | Tceanc2   | 0.0000 | No |
| 46337 | Tceb1     | 0.0000 | No |
| 46338 | Tceb2     | 0.0000 | No |
| 46339 | Tceb3     | 0.0000 | No |
| 46340 | Tcerg1    | 0.0000 | No |
| 46341 | Tcerg11   | 0.0000 | No |
| 46342 | Tcf12     | 0.0000 | No |
| 46343 | Tcf15     | 0.0000 | No |
| 46344 | Tcf19     | 0.0000 | No |
| 46345 | Tcf20     | 0.0000 | No |
| 46346 | Tcf21     | 0.0000 | No |
| 46347 | Tcf23     | 0.0000 | No |
| 46348 | Tcf24     | 0.0000 | No |
| 46349 | Tcf25     | 0.0000 | No |
| 46350 | Tcf3      | 0.0000 | No |
| 46351 | Tcf7l1    | 0.0000 | No |
| 46352 | Tcf7l2    | 0.0000 | No |
| 46353 | Tcf15     | 0.0000 | No |
| 46354 | Tchh      | 0.0000 | No |
| 46355 | Tchh1     | 0.0000 | No |
| 46356 | Tchp      | 0.0000 | No |
| 46357 | Tcigr1    | 0.0000 | No |
| 46358 | Tcl1      | 0.0000 | No |
| 46359 | Tcl1b1    | 0.0000 | No |
| 46360 | Tcl1b2    | 0.0000 | No |
| 46361 | Tcl1b3    | 0.0000 | No |
| 46362 | Tcl1b4    | 0.0000 | No |
| 46363 | Tcl1b5    | 0.0000 | No |
| 46364 | Tcp1      | 0.0000 | No |
| 46365 | Tcp10a    | 0.0000 | No |



|       |           |        |    |
|-------|-----------|--------|----|
| 46366 | Tcp10b    | 0.0000 | No |
| 46367 | Tcp10c    | 0.0000 | No |
| 46368 | Tcp11     | 0.0000 | No |
| 46369 | Tcp1111   | 0.0000 | No |
| 46370 | Tcp1112   | 0.0000 | No |
| 46371 | Tcp11x2   | 0.0000 | No |
| 46372 | Tcp1-ps1  | 0.0000 | No |
| 46373 | Tcrg-V7   | 0.0000 | No |
| 46374 | Tctsv3    | 0.0000 | No |
| 46375 | Tcta      | 0.0000 | No |
| 46376 | Tcte1     | 0.0000 | No |
| 46377 | Tcte2     | 0.0000 | No |
| 46378 | Tcte3     | 0.0000 | No |
| 46379 | Tctex1d1  | 0.0000 | No |
| 46380 | Tctex1d2  | 0.0000 | No |
| 46381 | Tctex1d4  | 0.0000 | No |
| 46382 | Tctn1     | 0.0000 | No |
| 46383 | Tctn2     | 0.0000 | No |
| 46384 | Tctn3     | 0.0000 | No |
| 46385 | Tdg       | 0.0000 | No |
| 46386 | Tdgf1     | 0.0000 | No |
| 46387 | Tdgf1-ps1 | 0.0000 | No |
| 46388 | Tdgf1-ps2 | 0.0000 | No |
| 46389 | Tdg-ps    | 0.0000 | No |
| 46390 | Tdh       | 0.0000 | No |
| 46391 | Tdo2      | 0.0000 | No |
| 46392 | Tdp1      | 0.0000 | No |
| 46393 | Tdp2      | 0.0000 | No |
| 46394 | Tdpoz1    | 0.0000 | No |
| 46395 | Tdpoz3    | 0.0000 | No |
| 46396 | Tdpoz4    | 0.0000 | No |
| 46397 | Tdpoz5    | 0.0000 | No |
| 46398 | Tdpx-ps1  | 0.0000 | No |
| 46399 | Tdrd1     | 0.0000 | No |
| 46400 | Tdrd12    | 0.0000 | No |
| 46401 | Tdrd3     | 0.0000 | No |
| 46402 | Tdrd5     | 0.0000 | No |
| 46403 | Tdrd6     | 0.0000 | No |
| 46404 | Tdrd7     | 0.0000 | No |
| 46405 | Tdrkh     | 0.0000 | No |
| 46406 | Tead1     | 0.0000 | No |
| 46407 | Tead2     | 0.0000 | No |
| 46408 | Tead3     | 0.0000 | No |
| 46409 | Tead4     | 0.0000 | No |
| 46410 | Tec       | 0.0000 | No |
| 46411 | Tecpr1    | 0.0000 | No |

|       |         |        |    |
|-------|---------|--------|----|
| 46412 | Tecpr2  | 0.0000 | No |
| 46413 | Tecr    | 0.0000 | No |
| 46414 | Tecrl   | 0.0000 | No |
| 46415 | Tecta   | 0.0000 | No |
| 46416 | Tectb   | 0.0000 | No |
| 46417 | Teddm1a | 0.0000 | No |
| 46418 | Teddm1b | 0.0000 | No |
| 46419 | Teddm2  | 0.0000 | No |
| 46420 | Teddm3  | 0.0000 | No |
| 46421 | Tef     | 0.0000 | No |
| 46422 | Tefm    | 0.0000 | No |
| 46423 | Tekt1   | 0.0000 | No |
| 46424 | Tekt2   | 0.0000 | No |
| 46425 | Tekt3   | 0.0000 | No |
| 46426 | Tekt5   | 0.0000 | No |
| 46427 | Telo2   | 0.0000 | No |
| 46428 | Ten1    | 0.0000 | No |
| 46429 | Tenm1   | 0.0000 | No |
| 46430 | Tenm2   | 0.0000 | No |
| 46431 | Tenm3   | 0.0000 | No |
| 46432 | Tenm4   | 0.0000 | No |
| 46433 | Tep1    | 0.0000 | No |
| 46434 | Tepp    | 0.0000 | No |
| 46435 | Tepsin  | 0.0000 | No |
| 46436 | Terb1   | 0.0000 | No |
| 46437 | Terb2   | 0.0000 | No |
| 46438 | Terf1   | 0.0000 | No |
| 46439 | Terf2   | 0.0000 | No |
| 46440 | Terf2ip | 0.0000 | No |
| 46441 | Tert    | 0.0000 | No |
| 46442 | Tes     | 0.0000 | No |
| 46443 | Tes3-ps | 0.0000 | No |
| 46444 | Tescl   | 0.0000 | No |
| 46445 | Tesk1   | 0.0000 | No |
| 46446 | Tesk2   | 0.0000 | No |
| 46447 | Tespa1  | 0.0000 | No |
| 46448 | Tet1    | 0.0000 | No |
| 46449 | Tet2    | 0.0000 | No |
| 46450 | Tet3    | 0.0000 | No |
| 46451 | Tex10   | 0.0000 | No |
| 46452 | Tex101  | 0.0000 | No |
| 46453 | Tex11   | 0.0000 | No |
| 46454 | Tex12   | 0.0000 | No |
| 46455 | Tex13a  | 0.0000 | No |
| 46456 | Tex14   | 0.0000 | No |
| 46457 | Tex15   | 0.0000 | No |

|       |         |        |    |
|-------|---------|--------|----|
| 46458 | Tex16   | 0.0000 | No |
| 46459 | Tex19.1 | 0.0000 | No |
| 46460 | Tex2    | 0.0000 | No |
| 46461 | Tex21   | 0.0000 | No |
| 46462 | Tex22   | 0.0000 | No |
| 46463 | Tex24   | 0.0000 | No |
| 46464 | Tex26   | 0.0000 | No |
| 46465 | Tex261  | 0.0000 | No |
| 46466 | Tex264  | 0.0000 | No |
| 46467 | Tex28   | 0.0000 | No |
| 46468 | Tex29   | 0.0000 | No |
| 46469 | Tex30   | 0.0000 | No |
| 46470 | Tex33   | 0.0000 | No |
| 46471 | Tex35   | 0.0000 | No |
| 46472 | Tex37   | 0.0000 | No |
| 46473 | Tex38   | 0.0000 | No |
| 46474 | Tex40   | 0.0000 | No |
| 46475 | Tex43   | 0.0000 | No |
| 46476 | Tex9    | 0.0000 | No |
| 46477 | Tfam    | 0.0000 | No |
| 46478 | Tfap2a  | 0.0000 | No |
| 46479 | Tfap2b  | 0.0000 | No |
| 46480 | Tfap2d  | 0.0000 | No |
| 46481 | Tfap2e  | 0.0000 | No |
| 46482 | Tfap4   | 0.0000 | No |
| 46483 | Tfb1m   | 0.0000 | No |
| 46484 | Tfb2m   | 0.0000 | No |
| 46485 | Tfcp2   | 0.0000 | No |
| 46486 | Tfcp211 | 0.0000 | No |
| 46487 | Tfdp1   | 0.0000 | No |
| 46488 | Tfdp2   | 0.0000 | No |
| 46489 | Tfe3    | 0.0000 | No |
| 46490 | Tfeb    | 0.0000 | No |
| 46491 | Tfec    | 0.0000 | No |
| 46492 | Tff1    | 0.0000 | No |
| 46493 | Tff2    | 0.0000 | No |
| 46494 | Tfg     | 0.0000 | No |
| 46495 | Tfip11  | 0.0000 | No |
| 46496 | Tfpi    | 0.0000 | No |
| 46497 | Tfpi2   | 0.0000 | No |
| 46498 | Tfpt    | 0.0000 | No |
| 46499 | Tfr2    | 0.0000 | No |
| 46500 | Tfrc    | 0.0000 | No |
| 46501 | Tg      | 0.0000 | No |
| 46502 | Tgds    | 0.0000 | No |
| 46503 | Tgfa    | 0.0000 | No |

|       |           |        |    |
|-------|-----------|--------|----|
| 46504 | Tgfb1     | 0.0000 | No |
| 46505 | Tgfb1i1   | 0.0000 | No |
| 46506 | Tgfb2     | 0.0000 | No |
| 46507 | Tgfb3     | 0.0000 | No |
| 46508 | Tgfbi     | 0.0000 | No |
| 46509 | Tgfbr1    | 0.0000 | No |
| 46510 | Tgfbr2    | 0.0000 | No |
| 46511 | Tgfbr3    | 0.0000 | No |
| 46512 | Tgfbr3l   | 0.0000 | No |
| 46513 | Tgfbrap1  | 0.0000 | No |
| 46514 | Tgif1     | 0.0000 | No |
| 46515 | Tgif1-ps  | 0.0000 | No |
| 46516 | Tgif2     | 0.0000 | No |
| 46517 | Tgif2lx1  | 0.0000 | No |
| 46518 | Tgif2lx2  | 0.0000 | No |
| 46519 | Tgif2-ps1 | 0.0000 | No |
| 46520 | Tgm1      | 0.0000 | No |
| 46521 | Tgm2      | 0.0000 | No |
| 46522 | Tgm4      | 0.0000 | No |
| 46523 | Tgm5      | 0.0000 | No |
| 46524 | Tgm6      | 0.0000 | No |
| 46525 | Tgm7      | 0.0000 | No |
| 46526 | Tgoln1    | 0.0000 | No |
| 46527 | Tgs1      | 0.0000 | No |
| 46528 | Tgtp1     | 0.0000 | No |
| 46529 | Tgtp2     | 0.0000 | No |
| 46530 | Th        | 0.0000 | No |
| 46531 | Tha1      | 0.0000 | No |
| 46532 | Thada     | 0.0000 | No |
| 46533 | Thap1     | 0.0000 | No |
| 46534 | Thap11    | 0.0000 | No |
| 46535 | Thap2     | 0.0000 | No |
| 46536 | Thap3     | 0.0000 | No |
| 46537 | Thap4     | 0.0000 | No |
| 46538 | Thap6     | 0.0000 | No |
| 46539 | Thap7     | 0.0000 | No |
| 46540 | Thap8     | 0.0000 | No |
| 46541 | Thbs1     | 0.0000 | No |
| 46542 | Thbs2     | 0.0000 | No |
| 46543 | Thbs3     | 0.0000 | No |
| 46544 | Thbs4     | 0.0000 | No |
| 46545 | Theg      | 0.0000 | No |
| 46546 | Them4     | 0.0000 | No |
| 46547 | Them5     | 0.0000 | No |
| 46548 | Them6     | 0.0000 | No |
| 46549 | Them7     | 0.0000 | No |

|       |          |        |    |
|-------|----------|--------|----|
| 46550 | Themis2  | 0.0000 | No |
| 46551 | Themis3  | 0.0000 | No |
| 46552 | Thg11    | 0.0000 | No |
| 46553 | Thnsl1   | 0.0000 | No |
| 46554 | Thnsl2   | 0.0000 | No |
| 46555 | Thoc1    | 0.0000 | No |
| 46556 | Thoc2    | 0.0000 | No |
| 46557 | Thoc3    | 0.0000 | No |
| 46558 | Thoc5    | 0.0000 | No |
| 46559 | Thoc6    | 0.0000 | No |
| 46560 | Thoc7    | 0.0000 | No |
| 46561 | Thop1    | 0.0000 | No |
| 46562 | Thpo     | 0.0000 | No |
| 46563 | Thra     | 0.0000 | No |
| 46564 | Thrap3   | 0.0000 | No |
| 46565 | Thrb     | 0.0000 | No |
| 46566 | Thrsp    | 0.0000 | No |
| 46567 | Thsd1    | 0.0000 | No |
| 46568 | Thsd4    | 0.0000 | No |
| 46569 | Thsd7a   | 0.0000 | No |
| 46570 | Thsd7b   | 0.0000 | No |
| 46571 | Thtpa    | 0.0000 | No |
| 46572 | Thumpd1  | 0.0000 | No |
| 46573 | Thumpd2  | 0.0000 | No |
| 46574 | Thumpd3  | 0.0000 | No |
| 46575 | Thyn1    | 0.0000 | No |
| 46576 | Tia1     | 0.0000 | No |
| 46577 | Tial1    | 0.0000 | No |
| 46578 | Tiam1    | 0.0000 | No |
| 46579 | Ticrr    | 0.0000 | No |
| 46580 | Tifa     | 0.0000 | No |
| 46581 | Tifab    | 0.0000 | No |
| 46582 | Tigar    | 0.0000 | No |
| 46583 | Tigd2    | 0.0000 | No |
| 46584 | Tigd4    | 0.0000 | No |
| 46585 | Tigd5    | 0.0000 | No |
| 46586 | Tigit    | 0.0000 | No |
| 46587 | Timd2    | 0.0000 | No |
| 46588 | Timd4    | 0.0000 | No |
| 46589 | Timeless | 0.0000 | No |
| 46590 | Timm10   | 0.0000 | No |
| 46591 | Timm10b  | 0.0000 | No |
| 46592 | Timm13   | 0.0000 | No |
| 46593 | Timm17b  | 0.0000 | No |
| 46594 | Timm21   | 0.0000 | No |
| 46595 | Timm22   | 0.0000 | No |

|       |         |        |    |
|-------|---------|--------|----|
| 46596 | Timm23  | 0.0000 | No |
| 46597 | Timm44  | 0.0000 | No |
| 46598 | Timm50  | 0.0000 | No |
| 46599 | Timm8a1 | 0.0000 | No |
| 46600 | Timm8a2 | 0.0000 | No |
| 46601 | Timm8b  | 0.0000 | No |
| 46602 | Timm9   | 0.0000 | No |
| 46603 | Timmdc1 | 0.0000 | No |
| 46604 | Timp1   | 0.0000 | No |
| 46605 | Timp2   | 0.0000 | No |
| 46606 | Timp3   | 0.0000 | No |
| 46607 | Timp4   | 0.0000 | No |
| 46608 | Tinag   | 0.0000 | No |
| 46609 | Tinag11 | 0.0000 | No |
| 46610 | Tinf2   | 0.0000 | No |
| 46611 | Tiparp  | 0.0000 | No |
| 46612 | Tipin   | 0.0000 | No |
| 46613 | Tipr1   | 0.0000 | No |
| 46614 | Tirap   | 0.0000 | No |
| 46615 | Tjap1   | 0.0000 | No |
| 46616 | Tjp1    | 0.0000 | No |
| 46617 | Tjp3    | 0.0000 | No |
| 46618 | Tk1     | 0.0000 | No |
| 46619 | Tk2     | 0.0000 | No |
| 46620 | Tkfc    | 0.0000 | No |
| 46621 | Tkt     | 0.0000 | No |
| 46622 | Tktl2   | 0.0000 | No |
| 46623 | Tlcd1   | 0.0000 | No |
| 46624 | Tlcd2   | 0.0000 | No |
| 46625 | Tldc1   | 0.0000 | No |
| 46626 | Tldc2   | 0.0000 | No |
| 46627 | Tle1    | 0.0000 | No |
| 46628 | Tle2    | 0.0000 | No |
| 46629 | Tle4    | 0.0000 | No |
| 46630 | Tle6    | 0.0000 | No |
| 46631 | Tlk1    | 0.0000 | No |
| 46632 | Tlk2    | 0.0000 | No |
| 46633 | Tll1    | 0.0000 | No |
| 46634 | Tll2    | 0.0000 | No |
| 46635 | Tln2    | 0.0000 | No |
| 46636 | Tlr11   | 0.0000 | No |
| 46637 | Tlr12   | 0.0000 | No |
| 46638 | Tlr2    | 0.0000 | No |
| 46639 | Tlr3    | 0.0000 | No |
| 46640 | Tlr4    | 0.0000 | No |
| 46641 | Tlr5    | 0.0000 | No |

|       |         |        |    |
|-------|---------|--------|----|
| 46642 | Tlr6    | 0.0000 | No |
| 46643 | Tlr7    | 0.0000 | No |
| 46644 | Tlx1    | 0.0000 | No |
| 46645 | Tlx1os  | 0.0000 | No |
| 46646 | Tlx2    | 0.0000 | No |
| 46647 | Tlx3    | 0.0000 | No |
| 46648 | Tm2d1   | 0.0000 | No |
| 46649 | Tm2d2   | 0.0000 | No |
| 46650 | Tm2d3   | 0.0000 | No |
| 46651 | Tm4sf1  | 0.0000 | No |
| 46652 | Tm4sf19 | 0.0000 | No |
| 46653 | Tm4sf20 | 0.0000 | No |
| 46654 | Tm4sf4  | 0.0000 | No |
| 46655 | Tm4sf5  | 0.0000 | No |
| 46656 | Tm6sf1  | 0.0000 | No |
| 46657 | Tm7sf2  | 0.0000 | No |
| 46658 | Tm7sf3  | 0.0000 | No |
| 46659 | Tm9sf1  | 0.0000 | No |
| 46660 | Tm9sf2  | 0.0000 | No |
| 46661 | Tm9sf3  | 0.0000 | No |
| 46662 | Tm9sf4  | 0.0000 | No |
| 46663 | Tma16   | 0.0000 | No |
| 46664 | Tma7    | 0.0000 | No |
| 46665 | Tma7-ps | 0.0000 | No |
| 46666 | Tmbim6  | 0.0000 | No |
| 46667 | Tmbim7  | 0.0000 | No |
| 46668 | Tmc1    | 0.0000 | No |
| 46669 | Tmc2    | 0.0000 | No |
| 46670 | Tmc3    | 0.0000 | No |
| 46671 | Tmc4    | 0.0000 | No |
| 46672 | Tmc5    | 0.0000 | No |
| 46673 | Tmc6    | 0.0000 | No |
| 46674 | Tmc7    | 0.0000 | No |
| 46675 | Tmc8    | 0.0000 | No |
| 46676 | Tmcc1   | 0.0000 | No |
| 46677 | Tmcc2   | 0.0000 | No |
| 46678 | Tmcc3   | 0.0000 | No |
| 46679 | Tmcc3os | 0.0000 | No |
| 46680 | Tmco1   | 0.0000 | No |
| 46681 | Tmco2   | 0.0000 | No |
| 46682 | Tmco3   | 0.0000 | No |
| 46683 | Tmco4   | 0.0000 | No |
| 46684 | Tmco5   | 0.0000 | No |
| 46685 | Tmco5b  | 0.0000 | No |
| 46686 | Tmco6   | 0.0000 | No |
| 46687 | Tmed1   | 0.0000 | No |

|       |            |        |    |
|-------|------------|--------|----|
| 46688 | Tmed10     | 0.0000 | No |
| 46689 | Tmed11     | 0.0000 | No |
| 46690 | Tmed2      | 0.0000 | No |
| 46691 | Tmed3      | 0.0000 | No |
| 46692 | Tmed4      | 0.0000 | No |
| 46693 | Tmed5      | 0.0000 | No |
| 46694 | Tmed6      | 0.0000 | No |
| 46695 | Tmed7      | 0.0000 | No |
| 46696 | Tmed8      | 0.0000 | No |
| 46697 | Tmed9      | 0.0000 | No |
| 46698 | Tmeff1     | 0.0000 | No |
| 46699 | Tmeff2     | 0.0000 | No |
| 46700 | Tmem101    | 0.0000 | No |
| 46701 | Tmem104    | 0.0000 | No |
| 46702 | Tmem106a   | 0.0000 | No |
| 46703 | Tmem106b   | 0.0000 | No |
| 46704 | Tmem106c   | 0.0000 | No |
| 46705 | Tmem107    | 0.0000 | No |
| 46706 | Tmem108    | 0.0000 | No |
| 46707 | Tmem109    | 0.0000 | No |
| 46708 | Tmem11     | 0.0000 | No |
| 46709 | Tmem110    | 0.0000 | No |
| 46710 | Tmem114    | 0.0000 | No |
| 46711 | Tmem115    | 0.0000 | No |
| 46712 | Tmem116    | 0.0000 | No |
| 46713 | Tmem117    | 0.0000 | No |
| 46714 | Tmem120a   | 0.0000 | No |
| 46715 | Tmem120b   | 0.0000 | No |
| 46716 | Tmem121    | 0.0000 | No |
| 46717 | Tmem123    | 0.0000 | No |
| 46718 | Tmem125    | 0.0000 | No |
| 46719 | Tmem126a   | 0.0000 | No |
| 46720 | Tmem126b   | 0.0000 | No |
| 46721 | Tmem127    | 0.0000 | No |
| 46722 | Tmem128    | 0.0000 | No |
| 46723 | Tmem129    | 0.0000 | No |
| 46724 | Tmem130    | 0.0000 | No |
| 46725 | Tmem131    | 0.0000 | No |
| 46726 | Tmem132a   | 0.0000 | No |
| 46727 | Tmem132b   | 0.0000 | No |
| 46728 | Tmem132c   | 0.0000 | No |
| 46729 | Tmem132cos | 0.0000 | No |
| 46730 | Tmem132d   | 0.0000 | No |
| 46731 | Tmem132e   | 0.0000 | No |
| 46732 | Tmem134    | 0.0000 | No |
| 46733 | Tmem135    | 0.0000 | No |



|       |             |        |    |
|-------|-------------|--------|----|
| 46734 | Tmem136     | 0.0000 | No |
| 46735 | Tmem138     | 0.0000 | No |
| 46736 | Tmem139     | 0.0000 | No |
| 46737 | Tmem140     | 0.0000 | No |
| 46738 | Tmem141     | 0.0000 | No |
| 46739 | Tmem143     | 0.0000 | No |
| 46740 | Tmem144     | 0.0000 | No |
| 46741 | Tmem147     | 0.0000 | No |
| 46742 | Tmem147os   | 0.0000 | No |
| 46743 | Tmem14c     | 0.0000 | No |
| 46744 | Tmem150a    | 0.0000 | No |
| 46745 | Tmem150b    | 0.0000 | No |
| 46746 | Tmem150c    | 0.0000 | No |
| 46747 | Tmem150cos  | 0.0000 | No |
| 46748 | Tmem151b    | 0.0000 | No |
| 46749 | Tmem154     | 0.0000 | No |
| 46750 | Tmem156     | 0.0000 | No |
| 46751 | Tmem160     | 0.0000 | No |
| 46752 | Tmem161b    | 0.0000 | No |
| 46753 | Tmem163     | 0.0000 | No |
| 46754 | Tmem164     | 0.0000 | No |
| 46755 | Tmem165     | 0.0000 | No |
| 46756 | Tmem167     | 0.0000 | No |
| 46757 | Tmem167b    | 0.0000 | No |
| 46758 | Tmem167-ps1 | 0.0000 | No |
| 46759 | Tmem167-ps2 | 0.0000 | No |
| 46760 | Tmem167-ps3 | 0.0000 | No |
| 46761 | Tmem168     | 0.0000 | No |
| 46762 | Tmem169     | 0.0000 | No |
| 46763 | Tmem17      | 0.0000 | No |
| 46764 | Tmem170     | 0.0000 | No |
| 46765 | Tmem170b    | 0.0000 | No |
| 46766 | Tmem171     | 0.0000 | No |
| 46767 | Tmem173     | 0.0000 | No |
| 46768 | Tmem174     | 0.0000 | No |
| 46769 | Tmem175     | 0.0000 | No |
| 46770 | Tmem176a    | 0.0000 | No |
| 46771 | Tmem176b    | 0.0000 | No |
| 46772 | Tmem177     | 0.0000 | No |
| 46773 | Tmem178     | 0.0000 | No |
| 46774 | Tmem178b    | 0.0000 | No |
| 46775 | Tmem18      | 0.0000 | No |
| 46776 | Tmem181a    | 0.0000 | No |
| 46777 | Tmem181c-ps | 0.0000 | No |
| 46778 | Tmem182     | 0.0000 | No |
| 46779 | Tmem183a    | 0.0000 | No |

|       |          |        |    |
|-------|----------|--------|----|
| 46780 | Tmem184a | 0.0000 | No |
| 46781 | Tmem184b | 0.0000 | No |
| 46782 | Tmem184c | 0.0000 | No |
| 46783 | Tmem185a | 0.0000 | No |
| 46784 | Tmem185b | 0.0000 | No |
| 46785 | Tmem186  | 0.0000 | No |
| 46786 | Tmem189  | 0.0000 | No |
| 46787 | Tmem19   | 0.0000 | No |
| 46788 | Tmem190  | 0.0000 | No |
| 46789 | Tmem191c | 0.0000 | No |
| 46790 | Tmem192  | 0.0000 | No |
| 46791 | Tmem196  | 0.0000 | No |
| 46792 | Tmem198  | 0.0000 | No |
| 46793 | Tmem198b | 0.0000 | No |
| 46794 | Tmem199  | 0.0000 | No |
| 46795 | Tmem2    | 0.0000 | No |
| 46796 | Tmem200c | 0.0000 | No |
| 46797 | Tmem201  | 0.0000 | No |
| 46798 | Tmem202  | 0.0000 | No |
| 46799 | Tmem203  | 0.0000 | No |
| 46800 | Tmem204  | 0.0000 | No |
| 46801 | Tmem205  | 0.0000 | No |
| 46802 | Tmem206  | 0.0000 | No |
| 46803 | Tmem208  | 0.0000 | No |
| 46804 | Tmem209  | 0.0000 | No |
| 46805 | Tmem210  | 0.0000 | No |
| 46806 | Tmem212  | 0.0000 | No |
| 46807 | Tmem214  | 0.0000 | No |
| 46808 | Tmem216  | 0.0000 | No |
| 46809 | Tmem217  | 0.0000 | No |
| 46810 | Tmem218  | 0.0000 | No |
| 46811 | Tmem219  | 0.0000 | No |
| 46812 | Tmem220  | 0.0000 | No |
| 46813 | Tmem222  | 0.0000 | No |
| 46814 | Tmem229a | 0.0000 | No |
| 46815 | Tmem229b | 0.0000 | No |
| 46816 | Tmem230  | 0.0000 | No |
| 46817 | Tmem231  | 0.0000 | No |
| 46818 | Tmem232  | 0.0000 | No |
| 46819 | Tmem233  | 0.0000 | No |
| 46820 | Tmem234  | 0.0000 | No |
| 46821 | Tmem235  | 0.0000 | No |
| 46822 | Tmem236  | 0.0000 | No |
| 46823 | Tmem237  | 0.0000 | No |
| 46824 | Tmem238  | 0.0000 | No |
| 46825 | Tmem239  | 0.0000 | No |

|       |          |        |    |
|-------|----------|--------|----|
| 46826 | Tmem240  | 0.0000 | No |
| 46827 | Tmem241  | 0.0000 | No |
| 46828 | Tmem242  | 0.0000 | No |
| 46829 | Tmem243  | 0.0000 | No |
| 46830 | Tmem245  | 0.0000 | No |
| 46831 | Tmem246  | 0.0000 | No |
| 46832 | Tmem247  | 0.0000 | No |
| 46833 | Tmem248  | 0.0000 | No |
| 46834 | Tmem25   | 0.0000 | No |
| 46835 | Tmem251  | 0.0000 | No |
| 46836 | Tmem253  | 0.0000 | No |
| 46837 | Tmem254a | 0.0000 | No |
| 46838 | Tmem254b | 0.0000 | No |
| 46839 | Tmem254c | 0.0000 | No |
| 46840 | Tmem255a | 0.0000 | No |
| 46841 | Tmem255b | 0.0000 | No |
| 46842 | Tmem256  | 0.0000 | No |
| 46843 | Tmem258  | 0.0000 | No |
| 46844 | Tmem259  | 0.0000 | No |
| 46845 | Tmem26   | 0.0000 | No |
| 46846 | Tmem260  | 0.0000 | No |
| 46847 | Tmem261  | 0.0000 | No |
| 46848 | Tmem262  | 0.0000 | No |
| 46849 | Tmem263  | 0.0000 | No |
| 46850 | Tmem265  | 0.0000 | No |
| 46851 | Tmem266  | 0.0000 | No |
| 46852 | Tmem267  | 0.0000 | No |
| 46853 | Tmem268  | 0.0000 | No |
| 46854 | Tmem27   | 0.0000 | No |
| 46855 | Tmem28   | 0.0000 | No |
| 46856 | Tmem29   | 0.0000 | No |
| 46857 | Tmem30b  | 0.0000 | No |
| 46858 | Tmem30c  | 0.0000 | No |
| 46859 | Tmem33   | 0.0000 | No |
| 46860 | Tmem35a  | 0.0000 | No |
| 46861 | Tmem38a  | 0.0000 | No |
| 46862 | Tmem38b  | 0.0000 | No |
| 46863 | Tmem39a  | 0.0000 | No |
| 46864 | Tmem39b  | 0.0000 | No |
| 46865 | Tmem40   | 0.0000 | No |
| 46866 | Tmem41a  | 0.0000 | No |
| 46867 | Tmem41b  | 0.0000 | No |
| 46868 | Tmem42   | 0.0000 | No |
| 46869 | Tmem43   | 0.0000 | No |
| 46870 | Tmem44   | 0.0000 | No |
| 46871 | Tmem45a2 | 0.0000 | No |

|       |           |        |    |
|-------|-----------|--------|----|
| 46872 | Tmem45b   | 0.0000 | No |
| 46873 | Tmem47    | 0.0000 | No |
| 46874 | Tmem5     | 0.0000 | No |
| 46875 | Tmem50a   | 0.0000 | No |
| 46876 | Tmem50b   | 0.0000 | No |
| 46877 | Tmem51os1 | 0.0000 | No |
| 46878 | Tmem52    | 0.0000 | No |
| 46879 | Tmem52b   | 0.0000 | No |
| 46880 | Tmem53    | 0.0000 | No |
| 46881 | Tmem54    | 0.0000 | No |
| 46882 | Tmem55a   | 0.0000 | No |
| 46883 | Tmem56    | 0.0000 | No |
| 46884 | Tmem57    | 0.0000 | No |
| 46885 | Tmem59    | 0.0000 | No |
| 46886 | Tmem59l   | 0.0000 | No |
| 46887 | Tmem60    | 0.0000 | No |
| 46888 | Tmem61    | 0.0000 | No |
| 46889 | Tmem62    | 0.0000 | No |
| 46890 | Tmem63a   | 0.0000 | No |
| 46891 | Tmem63b   | 0.0000 | No |
| 46892 | Tmem63c   | 0.0000 | No |
| 46893 | Tmem64    | 0.0000 | No |
| 46894 | Tmem65    | 0.0000 | No |
| 46895 | Tmem67    | 0.0000 | No |
| 46896 | Tmem68    | 0.0000 | No |
| 46897 | Tmem69    | 0.0000 | No |
| 46898 | Tmem70    | 0.0000 | No |
| 46899 | Tmem71    | 0.0000 | No |
| 46900 | Tmem72    | 0.0000 | No |
| 46901 | Tmem74    | 0.0000 | No |
| 46902 | Tmem74b   | 0.0000 | No |
| 46903 | Tmem74bos | 0.0000 | No |
| 46904 | Tmem79    | 0.0000 | No |
| 46905 | Tmem8     | 0.0000 | No |
| 46906 | Tmem80    | 0.0000 | No |
| 46907 | Tmem81    | 0.0000 | No |
| 46908 | Tmem82    | 0.0000 | No |
| 46909 | Tmem86a   | 0.0000 | No |
| 46910 | Tmem86b   | 0.0000 | No |
| 46911 | Tmem87a   | 0.0000 | No |
| 46912 | Tmem87b   | 0.0000 | No |
| 46913 | Tmem88    | 0.0000 | No |
| 46914 | Tmem88b   | 0.0000 | No |
| 46915 | Tmem89    | 0.0000 | No |
| 46916 | Tmem8b    | 0.0000 | No |
| 46917 | Tmem8c    | 0.0000 | No |

|       |           |        |    |
|-------|-----------|--------|----|
| 46918 | Tmem9     | 0.0000 | No |
| 46919 | Tmem91    | 0.0000 | No |
| 46920 | Tmem92    | 0.0000 | No |
| 46921 | Tmem94    | 0.0000 | No |
| 46922 | Tmem97    | 0.0000 | No |
| 46923 | Tmem98    | 0.0000 | No |
| 46924 | Tmem9b    | 0.0000 | No |
| 46925 | Tmfl      | 0.0000 | No |
| 46926 | Tmigd1    | 0.0000 | No |
| 46927 | Tmigd3    | 0.0000 | No |
| 46928 | Tmlhe     | 0.0000 | No |
| 46929 | Tmod2     | 0.0000 | No |
| 46930 | Tmod3     | 0.0000 | No |
| 46931 | Tmod4     | 0.0000 | No |
| 46932 | Tmpo      | 0.0000 | No |
| 46933 | Tmppe     | 0.0000 | No |
| 46934 | Tmprss11a | 0.0000 | No |
| 46935 | Tmprss11b | 0.0000 | No |
| 46936 | Tmprss11c | 0.0000 | No |
| 46937 | Tmprss11d | 0.0000 | No |
| 46938 | Tmprss11e | 0.0000 | No |
| 46939 | Tmprss11f | 0.0000 | No |
| 46940 | Tmprss11g | 0.0000 | No |
| 46941 | Tmprss12  | 0.0000 | No |
| 46942 | Tmprss13  | 0.0000 | No |
| 46943 | Tmprss15  | 0.0000 | No |
| 46944 | Tmprss2   | 0.0000 | No |
| 46945 | Tmprss3   | 0.0000 | No |
| 46946 | Tmprss4   | 0.0000 | No |
| 46947 | Tmprss5   | 0.0000 | No |
| 46948 | Tmprss6   | 0.0000 | No |
| 46949 | Tmprss7   | 0.0000 | No |
| 46950 | Tmprss9   | 0.0000 | No |
| 46951 | Tmsb10    | 0.0000 | No |
| 46952 | Tmsb15b1  | 0.0000 | No |
| 46953 | Tmsb15b2  | 0.0000 | No |
| 46954 | Tmsb15l   | 0.0000 | No |
| 46955 | Tmsb4x    | 0.0000 | No |
| 46956 | Tmtc1     | 0.0000 | No |
| 46957 | Tmtc2     | 0.0000 | No |
| 46958 | Tmtc3     | 0.0000 | No |
| 46959 | Tmtc4     | 0.0000 | No |
| 46960 | Tmub1     | 0.0000 | No |
| 46961 | Tmub2     | 0.0000 | No |
| 46962 | Tmx1      | 0.0000 | No |
| 46963 | Tmx2      | 0.0000 | No |

|       |           |        |    |
|-------|-----------|--------|----|
| 46964 | Tmx3      | 0.0000 | No |
| 46965 | Tmx4      | 0.0000 | No |
| 46966 | Tnc       | 0.0000 | No |
| 46967 | Tnf       | 0.0000 | No |
| 46968 | Tnfaip1   | 0.0000 | No |
| 46969 | Tnfaip2   | 0.0000 | No |
| 46970 | Tnfaip3   | 0.0000 | No |
| 46971 | Tnfaip6   | 0.0000 | No |
| 46972 | Tnfaip8   | 0.0000 | No |
| 46973 | Tnfaip8l2 | 0.0000 | No |
| 46974 | Tnfaip8l3 | 0.0000 | No |
| 46975 | Tnfrsf10b | 0.0000 | No |
| 46976 | Tnfrsf11a | 0.0000 | No |
| 46977 | Tnfrsf11b | 0.0000 | No |
| 46978 | Tnfrsf12a | 0.0000 | No |
| 46979 | Tnfrsf14  | 0.0000 | No |
| 46980 | Tnfrsf17  | 0.0000 | No |
| 46981 | Tnfrsf18  | 0.0000 | No |
| 46982 | Tnfrsf19  | 0.0000 | No |
| 46983 | Tnfrsf1a  | 0.0000 | No |
| 46984 | Tnfrsf1b  | 0.0000 | No |
| 46985 | Tnfrsf21  | 0.0000 | No |
| 46986 | Tnfrsf22  | 0.0000 | No |
| 46987 | Tnfrsf23  | 0.0000 | No |
| 46988 | Tnfrsf25  | 0.0000 | No |
| 46989 | Tnfrsf26  | 0.0000 | No |
| 46990 | Tnfrsf4   | 0.0000 | No |
| 46991 | Tnfrsf8   | 0.0000 | No |
| 46992 | Tnfsf10   | 0.0000 | No |
| 46993 | Tnfsf11   | 0.0000 | No |
| 46994 | Tnfsf13b  | 0.0000 | No |
| 46995 | Tnfsf13os | 0.0000 | No |
| 46996 | Tnfsf15   | 0.0000 | No |
| 46997 | Tnfsf18   | 0.0000 | No |
| 46998 | Tnfsf4    | 0.0000 | No |
| 46999 | Tnfsf8    | 0.0000 | No |
| 47000 | Tnfsf9    | 0.0000 | No |
| 47001 | Tnip1     | 0.0000 | No |
| 47002 | Tnip2     | 0.0000 | No |
| 47003 | Tnip3     | 0.0000 | No |
| 47004 | Tnk2      | 0.0000 | No |
| 47005 | Tnk2os    | 0.0000 | No |
| 47006 | Tnks      | 0.0000 | No |
| 47007 | Tnks1bp1  | 0.0000 | No |
| 47008 | Tnks2     | 0.0000 | No |
| 47009 | Tnn       | 0.0000 | No |

|       |         |        |    |
|-------|---------|--------|----|
| 47010 | Tnnc2   | 0.0000 | No |
| 47011 | Tnni3   | 0.0000 | No |
| 47012 | Tnnt2   | 0.0000 | No |
| 47013 | Tnnt3   | 0.0000 | No |
| 47014 | Tnp1    | 0.0000 | No |
| 47015 | Tnp2    | 0.0000 | No |
| 47016 | Tnpo1   | 0.0000 | No |
| 47017 | Tnpo2   | 0.0000 | No |
| 47018 | Tnpo3   | 0.0000 | No |
| 47019 | Tnr     | 0.0000 | No |
| 47020 | Tnrc18  | 0.0000 | No |
| 47021 | Tnrc6a  | 0.0000 | No |
| 47022 | Tnrc6b  | 0.0000 | No |
| 47023 | Tnrc6c  | 0.0000 | No |
| 47024 | Tns1    | 0.0000 | No |
| 47025 | Tns2    | 0.0000 | No |
| 47026 | Tns3    | 0.0000 | No |
| 47027 | Tnxb    | 0.0000 | No |
| 47028 | Tob1    | 0.0000 | No |
| 47029 | Tob2    | 0.0000 | No |
| 47030 | Toe1    | 0.0000 | No |
| 47031 | Tollip  | 0.0000 | No |
| 47032 | Tom1    | 0.0000 | No |
| 47033 | Tom111  | 0.0000 | No |
| 47034 | Tom112  | 0.0000 | No |
| 47035 | Tomm20l | 0.0000 | No |
| 47036 | Tomm22  | 0.0000 | No |
| 47037 | Tomm34  | 0.0000 | No |
| 47038 | Tomm40  | 0.0000 | No |
| 47039 | Tomm40l | 0.0000 | No |
| 47040 | Tomm5   | 0.0000 | No |
| 47041 | Tomm6   | 0.0000 | No |
| 47042 | Tomm6os | 0.0000 | No |
| 47043 | Tomm7   | 0.0000 | No |
| 47044 | Tomm70a | 0.0000 | No |
| 47045 | Tomt    | 0.0000 | No |
| 47046 | Tonsl   | 0.0000 | No |
| 47047 | Top1    | 0.0000 | No |
| 47048 | Top1mt  | 0.0000 | No |
| 47049 | Top2a   | 0.0000 | No |
| 47050 | Top2b   | 0.0000 | No |
| 47051 | Top3a   | 0.0000 | No |
| 47052 | Top3b   | 0.0000 | No |
| 47053 | Topaz1  | 0.0000 | No |
| 47054 | Topbp1  | 0.0000 | No |
| 47055 | Topors  | 0.0000 | No |

|       |          |        |    |
|-------|----------|--------|----|
| 47056 | Toporsl  | 0.0000 | No |
| 47057 | Toporsos | 0.0000 | No |
| 47058 | Tor1a    | 0.0000 | No |
| 47059 | Tor1aip1 | 0.0000 | No |
| 47060 | Tor1aip2 | 0.0000 | No |
| 47061 | Tor1b    | 0.0000 | No |
| 47062 | Tor2a    | 0.0000 | No |
| 47063 | Tor3a    | 0.0000 | No |
| 47064 | Tor4a    | 0.0000 | No |
| 47065 | Tox      | 0.0000 | No |
| 47066 | Tox2     | 0.0000 | No |
| 47067 | Tox3     | 0.0000 | No |
| 47068 | Tox4     | 0.0000 | No |
| 47069 | Tpbg     | 0.0000 | No |
| 47070 | Tpbgl    | 0.0000 | No |
| 47071 | Tpbpa    | 0.0000 | No |
| 47072 | Tpcn1    | 0.0000 | No |
| 47073 | Tpcn2    | 0.0000 | No |
| 47074 | Tpd52    | 0.0000 | No |
| 47075 | Tpd52l2  | 0.0000 | No |
| 47076 | Tpd52-ps | 0.0000 | No |
| 47077 | Tpgs1    | 0.0000 | No |
| 47078 | Tpgs2    | 0.0000 | No |
| 47079 | Tph1     | 0.0000 | No |
| 47080 | Tph2     | 0.0000 | No |
| 47081 | Tpi1     | 0.0000 | No |
| 47082 | Tpi-rs11 | 0.0000 | No |
| 47083 | Tpi-rs2  | 0.0000 | No |
| 47084 | Tpi-rs8  | 0.0000 | No |
| 47085 | Tpk1     | 0.0000 | No |
| 47086 | Tpm3     | 0.0000 | No |
| 47087 | Tpm3-rs2 | 0.0000 | No |
| 47088 | Tpm3-rs7 | 0.0000 | No |
| 47089 | Tpmt     | 0.0000 | No |
| 47090 | Tpo      | 0.0000 | No |
| 47091 | Tpp1     | 0.0000 | No |
| 47092 | Tpp2     | 0.0000 | No |
| 47093 | Tppp     | 0.0000 | No |
| 47094 | Tppp2    | 0.0000 | No |
| 47095 | Tppp3    | 0.0000 | No |
| 47096 | Tpr      | 0.0000 | No |
| 47097 | Tpra1    | 0.0000 | No |
| 47098 | Tprg     | 0.0000 | No |
| 47099 | Tprgl    | 0.0000 | No |
| 47100 | Tprkb    | 0.0000 | No |
| 47101 | Tprn     | 0.0000 | No |



|       |          |        |    |
|-------|----------|--------|----|
| 47102 | Tpsab1   | 0.0000 | No |
| 47103 | Tpsb2    | 0.0000 | No |
| 47104 | Tpsg1    | 0.0000 | No |
| 47105 | Tpst1    | 0.0000 | No |
| 47106 | Tpst2    | 0.0000 | No |
| 47107 | Tpt1     | 0.0000 | No |
| 47108 | Tpt1-ps1 | 0.0000 | No |
| 47109 | Tpt1-ps2 | 0.0000 | No |
| 47110 | Tpt1-ps3 | 0.0000 | No |
| 47111 | Tpt1-ps4 | 0.0000 | No |
| 47112 | Tpt1-ps5 | 0.0000 | No |
| 47113 | Tpt1-ps6 | 0.0000 | No |
| 47114 | Tpte     | 0.0000 | No |
| 47115 | Tpx2     | 0.0000 | No |
| 47116 | Tra2a    | 0.0000 | No |
| 47117 | Tra2b    | 0.0000 | No |
| 47118 | Tra2b-ps | 0.0000 | No |
| 47119 | Trabd    | 0.0000 | No |
| 47120 | Trabd2b  | 0.0000 | No |
| 47121 | Tradd    | 0.0000 | No |
| 47122 | Traf1    | 0.0000 | No |
| 47123 | Traf2    | 0.0000 | No |
| 47124 | Traf3    | 0.0000 | No |
| 47125 | Traf3ip1 | 0.0000 | No |
| 47126 | Traf3ip2 | 0.0000 | No |
| 47127 | Traf3ip3 | 0.0000 | No |
| 47128 | Traf4    | 0.0000 | No |
| 47129 | Traf5    | 0.0000 | No |
| 47130 | Traf6    | 0.0000 | No |
| 47131 | Trafd1   | 0.0000 | No |
| 47132 | Traip    | 0.0000 | No |
| 47133 | Traj1    | 0.0000 | No |
| 47134 | Traj13   | 0.0000 | No |
| 47135 | Traj16   | 0.0000 | No |
| 47136 | Traj22   | 0.0000 | No |
| 47137 | Traj24   | 0.0000 | No |
| 47138 | Traj25   | 0.0000 | No |
| 47139 | Traj28   | 0.0000 | No |
| 47140 | Traj31   | 0.0000 | No |
| 47141 | Traj53   | 0.0000 | No |
| 47142 | Traj54   | 0.0000 | No |
| 47143 | Traj58   | 0.0000 | No |
| 47144 | Traj59   | 0.0000 | No |
| 47145 | Traj60   | 0.0000 | No |
| 47146 | Traj7    | 0.0000 | No |
| 47147 | Trak1    | 0.0000 | No |

|       |           |        |    |
|-------|-----------|--------|----|
| 47148 | Trak2     | 0.0000 | No |
| 47149 | Tram1     | 0.0000 | No |
| 47150 | Tram11    | 0.0000 | No |
| 47151 | Tram2     | 0.0000 | No |
| 47152 | Trank1    | 0.0000 | No |
| 47153 | Trap1     | 0.0000 | No |
| 47154 | Trap1a    | 0.0000 | No |
| 47155 | Trappc1   | 0.0000 | No |
| 47156 | Trappc10  | 0.0000 | No |
| 47157 | Trappc11  | 0.0000 | No |
| 47158 | Trappc12  | 0.0000 | No |
| 47159 | Trappc13  | 0.0000 | No |
| 47160 | Trappc2   | 0.0000 | No |
| 47161 | Trappc2l  | 0.0000 | No |
| 47162 | Trappc3   | 0.0000 | No |
| 47163 | Trappc3l  | 0.0000 | No |
| 47164 | Trappc4   | 0.0000 | No |
| 47165 | Trappc5   | 0.0000 | No |
| 47166 | Trappc6a  | 0.0000 | No |
| 47167 | Trappc6b  | 0.0000 | No |
| 47168 | Trappc8   | 0.0000 | No |
| 47169 | Trappc9   | 0.0000 | No |
| 47170 | Trav1     | 0.0000 | No |
| 47171 | Trav10d   | 0.0000 | No |
| 47172 | Trav11    | 0.0000 | No |
| 47173 | Trav11d   | 0.0000 | No |
| 47174 | Trav11n   | 0.0000 | No |
| 47175 | Trav12-1  | 0.0000 | No |
| 47176 | Trav12-4  | 0.0000 | No |
| 47177 | Trav12d-1 | 0.0000 | No |
| 47178 | Trav12d-2 | 0.0000 | No |
| 47179 | Trav12d-3 | 0.0000 | No |
| 47180 | Trav12n-1 | 0.0000 | No |
| 47181 | Trav12n-2 | 0.0000 | No |
| 47182 | Trav12n-3 | 0.0000 | No |
| 47183 | Trav13-3  | 0.0000 | No |
| 47184 | Trav13d-1 | 0.0000 | No |
| 47185 | Trav13d-2 | 0.0000 | No |
| 47186 | Trav13d-3 | 0.0000 | No |
| 47187 | Trav13d-4 | 0.0000 | No |
| 47188 | Trav13n-1 | 0.0000 | No |
| 47189 | Trav13n-2 | 0.0000 | No |
| 47190 | Trav13n-3 | 0.0000 | No |
| 47191 | Trav14d-1 | 0.0000 | No |
| 47192 | Trav14d-2 | 0.0000 | No |
| 47193 | Trav14n-1 | 0.0000 | No |

|       |                  |        |    |
|-------|------------------|--------|----|
| 47194 | Trav14n-2        | 0.0000 | No |
| 47195 | Trav14n-3        | 0.0000 | No |
| 47196 | Trav15-3         | 0.0000 | No |
| 47197 | Trav15d-1-dv6d-1 | 0.0000 | No |
| 47198 | Trav15d-2-dv6d-2 | 0.0000 | No |
| 47199 | Trav15d-3        | 0.0000 | No |
| 47200 | Trav15n-1        | 0.0000 | No |
| 47201 | Trav15n-2        | 0.0000 | No |
| 47202 | Trav15n-3        | 0.0000 | No |
| 47203 | Trav17           | 0.0000 | No |
| 47204 | Trav18           | 0.0000 | No |
| 47205 | Trav19           | 0.0000 | No |
| 47206 | Trav22           | 0.0000 | No |
| 47207 | Trav23           | 0.0000 | No |
| 47208 | Trav3-2          | 0.0000 | No |
| 47209 | Trav3d-2         | 0.0000 | No |
| 47210 | Trav3d-3         | 0.0000 | No |
| 47211 | Trav3n-2         | 0.0000 | No |
| 47212 | Trav3n-3         | 0.0000 | No |
| 47213 | Trav4-1          | 0.0000 | No |
| 47214 | Trav4-3          | 0.0000 | No |
| 47215 | Trav4-4-dv10     | 0.0000 | No |
| 47216 | Trav4d-2         | 0.0000 | No |
| 47217 | Trav4d-3         | 0.0000 | No |
| 47218 | Trav4d-4         | 0.0000 | No |
| 47219 | Trav4n-3         | 0.0000 | No |
| 47220 | Trav4n-4         | 0.0000 | No |
| 47221 | Trav5-2          | 0.0000 | No |
| 47222 | Trav5-4          | 0.0000 | No |
| 47223 | Trav5d-2         | 0.0000 | No |
| 47224 | Trav5d-3         | 0.0000 | No |
| 47225 | Trav5d-4         | 0.0000 | No |
| 47226 | Trav5n-2         | 0.0000 | No |
| 47227 | Trav5n-3         | 0.0000 | No |
| 47228 | Trav5n-4         | 0.0000 | No |
| 47229 | Trav6-1          | 0.0000 | No |
| 47230 | Trav6-2          | 0.0000 | No |
| 47231 | Trav6-6          | 0.0000 | No |
| 47232 | Trav6-7-dv9      | 0.0000 | No |
| 47233 | Trav6d-3         | 0.0000 | No |
| 47234 | Trav6d-4         | 0.0000 | No |
| 47235 | Trav6d-5         | 0.0000 | No |
| 47236 | Trav6d-6         | 0.0000 | No |
| 47237 | Trav6d-7         | 0.0000 | No |
| 47238 | Trav6n-7         | 0.0000 | No |
| 47239 | Trav7-2          | 0.0000 | No |

|       |          |        |    |
|-------|----------|--------|----|
| 47240 | Trav7-5  | 0.0000 | No |
| 47241 | Trav7d-2 | 0.0000 | No |
| 47242 | Trav7d-3 | 0.0000 | No |
| 47243 | Trav7d-5 | 0.0000 | No |
| 47244 | Trav7n-5 | 0.0000 | No |
| 47245 | Trav7n-6 | 0.0000 | No |
| 47246 | Trav8d-1 | 0.0000 | No |
| 47247 | Trav9d-2 | 0.0000 | No |
| 47248 | Trav9d-3 | 0.0000 | No |
| 47249 | Trav9d-4 | 0.0000 | No |
| 47250 | Trav9n-2 | 0.0000 | No |
| 47251 | Trav9n-3 | 0.0000 | No |
| 47252 | Trbd2    | 0.0000 | No |
| 47253 | Trbv1    | 0.0000 | No |
| 47254 | Trbv11   | 0.0000 | No |
| 47255 | Trbv12-3 | 0.0000 | No |
| 47256 | Trbv18   | 0.0000 | No |
| 47257 | Trbv25   | 0.0000 | No |
| 47258 | Trbv27   | 0.0000 | No |
| 47259 | Trbv29   | 0.0000 | No |
| 47260 | Trbv30   | 0.0000 | No |
| 47261 | Trbv7    | 0.0000 | No |
| 47262 | Trbv8    | 0.0000 | No |
| 47263 | Trbv9    | 0.0000 | No |
| 47264 | Treg1    | 0.0000 | No |
| 47265 | Trdd1    | 0.0000 | No |
| 47266 | Trdd2    | 0.0000 | No |
| 47267 | Trdmt1   | 0.0000 | No |
| 47268 | Trdv2-1  | 0.0000 | No |
| 47269 | Trdv3    | 0.0000 | No |
| 47270 | Treh     | 0.0000 | No |
| 47271 | Trem1    | 0.0000 | No |
| 47272 | Trem2    | 0.0000 | No |
| 47273 | Trem12   | 0.0000 | No |
| 47274 | Trem14   | 0.0000 | No |
| 47275 | Trex1    | 0.0000 | No |
| 47276 | Trex2    | 0.0000 | No |
| 47277 | Trf      | 0.0000 | No |
| 47278 | Trh      | 0.0000 | No |
| 47279 | Trhde    | 0.0000 | No |
| 47280 | Trhr     | 0.0000 | No |
| 47281 | Trhr2    | 0.0000 | No |
| 47282 | Triap1   | 0.0000 | No |
| 47283 | Trib1    | 0.0000 | No |
| 47284 | Trib2    | 0.0000 | No |
| 47285 | Trib3    | 0.0000 | No |

|       |             |        |    |
|-------|-------------|--------|----|
| 47286 | Tril        | 0.0000 | No |
| 47287 | Trim10      | 0.0000 | No |
| 47288 | Trim11      | 0.0000 | No |
| 47289 | Trim12a     | 0.0000 | No |
| 47290 | Trim12c     | 0.0000 | No |
| 47291 | Trim13      | 0.0000 | No |
| 47292 | Trim14      | 0.0000 | No |
| 47293 | Trim15      | 0.0000 | No |
| 47294 | Trim16      | 0.0000 | No |
| 47295 | Trim17      | 0.0000 | No |
| 47296 | Trim2       | 0.0000 | No |
| 47297 | Trim21      | 0.0000 | No |
| 47298 | Trim23      | 0.0000 | No |
| 47299 | Trim24      | 0.0000 | No |
| 47300 | Trim25      | 0.0000 | No |
| 47301 | Trim26      | 0.0000 | No |
| 47302 | Trim27      | 0.0000 | No |
| 47303 | Trim28      | 0.0000 | No |
| 47304 | Trim29      | 0.0000 | No |
| 47305 | Trim3       | 0.0000 | No |
| 47306 | Trim30a     | 0.0000 | No |
| 47307 | Trim30b     | 0.0000 | No |
| 47308 | Trim30c     | 0.0000 | No |
| 47309 | Trim30d     | 0.0000 | No |
| 47310 | Trim30e-ps1 | 0.0000 | No |
| 47311 | Trim31      | 0.0000 | No |
| 47312 | Trim32      | 0.0000 | No |
| 47313 | Trim33      | 0.0000 | No |
| 47314 | Trim34a     | 0.0000 | No |
| 47315 | Trim34b     | 0.0000 | No |
| 47316 | Trim35      | 0.0000 | No |
| 47317 | Trim36      | 0.0000 | No |
| 47318 | Trim37      | 0.0000 | No |
| 47319 | Trim39      | 0.0000 | No |
| 47320 | Trim40      | 0.0000 | No |
| 47321 | Trim41      | 0.0000 | No |
| 47322 | Trim42      | 0.0000 | No |
| 47323 | Trim43a     | 0.0000 | No |
| 47324 | Trim43b     | 0.0000 | No |
| 47325 | Trim43c     | 0.0000 | No |
| 47326 | Trim44      | 0.0000 | No |
| 47327 | Trim45      | 0.0000 | No |
| 47328 | Trim46      | 0.0000 | No |
| 47329 | Trim47      | 0.0000 | No |
| 47330 | Trim5       | 0.0000 | No |
| 47331 | Trim50      | 0.0000 | No |

|       |             |        |    |
|-------|-------------|--------|----|
| 47332 | Trim52      | 0.0000 | No |
| 47333 | Trim54      | 0.0000 | No |
| 47334 | Trim55      | 0.0000 | No |
| 47335 | Trim56      | 0.0000 | No |
| 47336 | Trim59      | 0.0000 | No |
| 47337 | Trim6       | 0.0000 | No |
| 47338 | Trim60      | 0.0000 | No |
| 47339 | Trim61      | 0.0000 | No |
| 47340 | Trim62      | 0.0000 | No |
| 47341 | Trim65      | 0.0000 | No |
| 47342 | Trim66      | 0.0000 | No |
| 47343 | Trim67      | 0.0000 | No |
| 47344 | Trim68      | 0.0000 | No |
| 47345 | Trim69      | 0.0000 | No |
| 47346 | Trim7       | 0.0000 | No |
| 47347 | Trim71      | 0.0000 | No |
| 47348 | Trim72      | 0.0000 | No |
| 47349 | Trim75      | 0.0000 | No |
| 47350 | Trim80      | 0.0000 | No |
| 47351 | Trim9       | 0.0000 | No |
| 47352 | Triml1      | 0.0000 | No |
| 47353 | Triml2      | 0.0000 | No |
| 47354 | Trio        | 0.0000 | No |
| 47355 | Triobp      | 0.0000 | No |
| 47356 | Trip10      | 0.0000 | No |
| 47357 | Trip11      | 0.0000 | No |
| 47358 | Trip12      | 0.0000 | No |
| 47359 | Trip13      | 0.0000 | No |
| 47360 | Trip4       | 0.0000 | No |
| 47361 | Trip6       | 0.0000 | No |
| 47362 | Triqk       | 0.0000 | No |
| 47363 | Trit1       | 0.0000 | No |
| 47364 | Trmo        | 0.0000 | No |
| 47365 | Trmt1       | 0.0000 | No |
| 47366 | Trmt10a     | 0.0000 | No |
| 47367 | Trmt10b     | 0.0000 | No |
| 47368 | Trmt10c     | 0.0000 | No |
| 47369 | Trmt11      | 0.0000 | No |
| 47370 | Trmt112     | 0.0000 | No |
| 47371 | Trmt112-ps2 | 0.0000 | No |
| 47372 | Trmt12      | 0.0000 | No |
| 47373 | Trmt13      | 0.0000 | No |
| 47374 | Trmt11      | 0.0000 | No |
| 47375 | Trmt2a      | 0.0000 | No |
| 47376 | Trmt2b      | 0.0000 | No |
| 47377 | Trmt44      | 0.0000 | No |

|       |           |        |    |
|-------|-----------|--------|----|
| 47378 | Trmt5     | 0.0000 | No |
| 47379 | Trmt6     | 0.0000 | No |
| 47380 | Trmt61a   | 0.0000 | No |
| 47381 | Trmt61b   | 0.0000 | No |
| 47382 | Trmu      | 0.0000 | No |
| 47383 | Trnau1ap  | 0.0000 | No |
| 47384 | Trnt1     | 0.0000 | No |
| 47385 | Tro       | 0.0000 | No |
| 47386 | Troap     | 0.0000 | No |
| 47387 | Trove2    | 0.0000 | No |
| 47388 | Trp53     | 0.0000 | No |
| 47389 | Trp53bp1  | 0.0000 | No |
| 47390 | Trp53bp2  | 0.0000 | No |
| 47391 | Trp53cor1 | 0.0000 | No |
| 47392 | Trp53i11  | 0.0000 | No |
| 47393 | Trp53i13  | 0.0000 | No |
| 47394 | Trp53inp1 | 0.0000 | No |
| 47395 | Trp53inp2 | 0.0000 | No |
| 47396 | Trp53-ps  | 0.0000 | No |
| 47397 | Trp53rka  | 0.0000 | No |
| 47398 | Trp53rkb  | 0.0000 | No |
| 47399 | Trp53tg5  | 0.0000 | No |
| 47400 | Trp63     | 0.0000 | No |
| 47401 | Trp73     | 0.0000 | No |
| 47402 | Trp73os   | 0.0000 | No |
| 47403 | Trpa1     | 0.0000 | No |
| 47404 | Trpc1     | 0.0000 | No |
| 47405 | Trpc2     | 0.0000 | No |
| 47406 | Trpc4     | 0.0000 | No |
| 47407 | Trpc4ap   | 0.0000 | No |
| 47408 | Trpc5     | 0.0000 | No |
| 47409 | Trpc6     | 0.0000 | No |
| 47410 | Trpc7     | 0.0000 | No |
| 47411 | Trpd5213  | 0.0000 | No |
| 47412 | Trpm1     | 0.0000 | No |
| 47413 | Trpm2     | 0.0000 | No |
| 47414 | Trpm3     | 0.0000 | No |
| 47415 | Trpm4     | 0.0000 | No |
| 47416 | Trpm5     | 0.0000 | No |
| 47417 | Trpm6     | 0.0000 | No |
| 47418 | Trpm7     | 0.0000 | No |
| 47419 | Trpm8     | 0.0000 | No |
| 47420 | Trpt1     | 0.0000 | No |
| 47421 | Trpv1     | 0.0000 | No |
| 47422 | Trpv3     | 0.0000 | No |
| 47423 | Trpv5     | 0.0000 | No |

|       |           |        |    |
|-------|-----------|--------|----|
| 47424 | Trpv6     | 0.0000 | No |
| 47425 | Trrap     | 0.0000 | No |
| 47426 | Trub1     | 0.0000 | No |
| 47427 | Trub2     | 0.0000 | No |
| 47428 | Try10     | 0.0000 | No |
| 47429 | Try4      | 0.0000 | No |
| 47430 | Tsacc     | 0.0000 | No |
| 47431 | Tsc1      | 0.0000 | No |
| 47432 | Tsc2      | 0.0000 | No |
| 47433 | Tsc22d1   | 0.0000 | No |
| 47434 | Tsc22d2   | 0.0000 | No |
| 47435 | Tsc22d3   | 0.0000 | No |
| 47436 | Tsc22d4   | 0.0000 | No |
| 47437 | Tsen15    | 0.0000 | No |
| 47438 | Tsen2     | 0.0000 | No |
| 47439 | Tsen34    | 0.0000 | No |
| 47440 | Tsen54    | 0.0000 | No |
| 47441 | Tsfm      | 0.0000 | No |
| 47442 | Tsg101    | 0.0000 | No |
| 47443 | Tsg101-ps | 0.0000 | No |
| 47444 | Tsga10    | 0.0000 | No |
| 47445 | Tsga10ip  | 0.0000 | No |
| 47446 | Tsga13    | 0.0000 | No |
| 47447 | Tsga8     | 0.0000 | No |
| 47448 | Tshb      | 0.0000 | No |
| 47449 | Tshr      | 0.0000 | No |
| 47450 | Tshz1     | 0.0000 | No |
| 47451 | Tshz2     | 0.0000 | No |
| 47452 | Tsix      | 0.0000 | No |
| 47453 | Tsks      | 0.0000 | No |
| 47454 | Tsku      | 0.0000 | No |
| 47455 | Tslp      | 0.0000 | No |
| 47456 | Tsn       | 0.0000 | No |
| 47457 | Tsnax     | 0.0000 | No |
| 47458 | Tsnaxip1  | 0.0000 | No |
| 47459 | Tspan1    | 0.0000 | No |
| 47460 | Tspan10   | 0.0000 | No |
| 47461 | Tspan11   | 0.0000 | No |
| 47462 | Tspan12   | 0.0000 | No |
| 47463 | Tspan13   | 0.0000 | No |
| 47464 | Tspan14   | 0.0000 | No |
| 47465 | Tspan15   | 0.0000 | No |
| 47466 | Tspan17   | 0.0000 | No |
| 47467 | Tspan18   | 0.0000 | No |
| 47468 | Tspan2    | 0.0000 | No |
| 47469 | Tspan3    | 0.0000 | No |



|       |           |        |    |
|-------|-----------|--------|----|
| 47470 | Tspan31   | 0.0000 | No |
| 47471 | Tspan32   | 0.0000 | No |
| 47472 | Tspan32os | 0.0000 | No |
| 47473 | Tspan33   | 0.0000 | No |
| 47474 | Tspan4    | 0.0000 | No |
| 47475 | Tspan5    | 0.0000 | No |
| 47476 | Tspan6    | 0.0000 | No |
| 47477 | Tspan7    | 0.0000 | No |
| 47478 | Tspan8    | 0.0000 | No |
| 47479 | Tspan9    | 0.0000 | No |
| 47480 | Tspear    | 0.0000 | No |
| 47481 | Tspo      | 0.0000 | No |
| 47482 | Tspo2     | 0.0000 | No |
| 47483 | Tspyl2    | 0.0000 | No |
| 47484 | Tspyl3    | 0.0000 | No |
| 47485 | Tspyl4    | 0.0000 | No |
| 47486 | Tspyl5    | 0.0000 | No |
| 47487 | Tspy-ps   | 0.0000 | No |
| 47488 | Tsr1      | 0.0000 | No |
| 47489 | Tsr2      | 0.0000 | No |
| 47490 | Tsr3      | 0.0000 | No |
| 47491 | Tssc1     | 0.0000 | No |
| 47492 | Tssc4     | 0.0000 | No |
| 47493 | Tssk1     | 0.0000 | No |
| 47494 | Tssk2     | 0.0000 | No |
| 47495 | Tssk3     | 0.0000 | No |
| 47496 | Tssk4     | 0.0000 | No |
| 47497 | Tssk5     | 0.0000 | No |
| 47498 | Tssk6     | 0.0000 | No |
| 47499 | Tst       | 0.0000 | No |
| 47500 | Tsta3     | 0.0000 | No |
| 47501 | Tstd1     | 0.0000 | No |
| 47502 | Tstd2     | 0.0000 | No |
| 47503 | Tstd3     | 0.0000 | No |
| 47504 | Tsx       | 0.0000 | No |
| 47505 | Ttbk2     | 0.0000 | No |
| 47506 | Ttc1      | 0.0000 | No |
| 47507 | Ttc12     | 0.0000 | No |
| 47508 | Ttc13     | 0.0000 | No |
| 47509 | Ttc14     | 0.0000 | No |
| 47510 | Ttc16     | 0.0000 | No |
| 47511 | Ttc17     | 0.0000 | No |
| 47512 | Ttc19     | 0.0000 | No |
| 47513 | Ttc21a    | 0.0000 | No |
| 47514 | Ttc21b    | 0.0000 | No |
| 47515 | Ttc22     | 0.0000 | No |

|       |           |        |    |
|-------|-----------|--------|----|
| 47516 | Ttc23     | 0.0000 | No |
| 47517 | Ttc23l    | 0.0000 | No |
| 47518 | Ttc24     | 0.0000 | No |
| 47519 | Ttc25     | 0.0000 | No |
| 47520 | Ttc26     | 0.0000 | No |
| 47521 | Ttc27     | 0.0000 | No |
| 47522 | Ttc29     | 0.0000 | No |
| 47523 | Ttc3      | 0.0000 | No |
| 47524 | Ttc30a1   | 0.0000 | No |
| 47525 | Ttc30b    | 0.0000 | No |
| 47526 | Ttc32     | 0.0000 | No |
| 47527 | Ttc33     | 0.0000 | No |
| 47528 | Ttc34     | 0.0000 | No |
| 47529 | Ttc37     | 0.0000 | No |
| 47530 | Ttc38     | 0.0000 | No |
| 47531 | Ttc39a    | 0.0000 | No |
| 47532 | Ttc39aos1 | 0.0000 | No |
| 47533 | Ttc39b    | 0.0000 | No |
| 47534 | Ttc39c    | 0.0000 | No |
| 47535 | Ttc39d    | 0.0000 | No |
| 47536 | Ttc4      | 0.0000 | No |
| 47537 | Ttc41     | 0.0000 | No |
| 47538 | Ttc5      | 0.0000 | No |
| 47539 | Ttc6      | 0.0000 | No |
| 47540 | Ttc7      | 0.0000 | No |
| 47541 | Ttc7b     | 0.0000 | No |
| 47542 | Ttc8      | 0.0000 | No |
| 47543 | Ttc9      | 0.0000 | No |
| 47544 | Ttc9b     | 0.0000 | No |
| 47545 | Ttc9c     | 0.0000 | No |
| 47546 | Ttf1      | 0.0000 | No |
| 47547 | Ttf2      | 0.0000 | No |
| 47548 | Tti1      | 0.0000 | No |
| 47549 | Tti2      | 0.0000 | No |
| 47550 | Ttk       | 0.0000 | No |
| 47551 | Ttl       | 0.0000 | No |
| 47552 | Ttl1      | 0.0000 | No |
| 47553 | Ttl10     | 0.0000 | No |
| 47554 | Ttl11     | 0.0000 | No |
| 47555 | Ttl12     | 0.0000 | No |
| 47556 | Ttl13     | 0.0000 | No |
| 47557 | Ttl3      | 0.0000 | No |
| 47558 | Ttl4      | 0.0000 | No |
| 47559 | Ttl5      | 0.0000 | No |
| 47560 | Ttl6      | 0.0000 | No |
| 47561 | Ttl7      | 0.0000 | No |

|       |            |        |    |
|-------|------------|--------|----|
| 47562 | Ttl18      | 0.0000 | No |
| 47563 | Ttl19      | 0.0000 | No |
| 47564 | Ttn        | 0.0000 | No |
| 47565 | Ttpal      | 0.0000 | No |
| 47566 | Ttyh1      | 0.0000 | No |
| 47567 | Ttyh2      | 0.0000 | No |
| 47568 | Ttyh3      | 0.0000 | No |
| 47569 | Tub        | 0.0000 | No |
| 47570 | Tuba1a     | 0.0000 | No |
| 47571 | Tuba1c     | 0.0000 | No |
| 47572 | Tuba3a     | 0.0000 | No |
| 47573 | Tuba3b     | 0.0000 | No |
| 47574 | Tuba8      | 0.0000 | No |
| 47575 | Tuba13     | 0.0000 | No |
| 47576 | Tubb1      | 0.0000 | No |
| 47577 | Tubb2a     | 0.0000 | No |
| 47578 | Tubb2b     | 0.0000 | No |
| 47579 | Tubb4a     | 0.0000 | No |
| 47580 | Tubb4b     | 0.0000 | No |
| 47581 | Tubb4b-ps1 | 0.0000 | No |
| 47582 | Tubb4b-ps2 | 0.0000 | No |
| 47583 | Tubd1      | 0.0000 | No |
| 47584 | Tube1      | 0.0000 | No |
| 47585 | Tubg1      | 0.0000 | No |
| 47586 | Tubg2      | 0.0000 | No |
| 47587 | Tubgcp2    | 0.0000 | No |
| 47588 | Tubgcp3    | 0.0000 | No |
| 47589 | Tubgcp4    | 0.0000 | No |
| 47590 | Tubgcp5    | 0.0000 | No |
| 47591 | Tubgcp6    | 0.0000 | No |
| 47592 | Tufm       | 0.0000 | No |
| 47593 | Tuft1      | 0.0000 | No |
| 47594 | Tug1       | 0.0000 | No |
| 47595 | Tulp1      | 0.0000 | No |
| 47596 | Tulp2      | 0.0000 | No |
| 47597 | Tulp3      | 0.0000 | No |
| 47598 | Tulp4      | 0.0000 | No |
| 47599 | Tunar      | 0.0000 | No |
| 47600 | Tusc1      | 0.0000 | No |
| 47601 | Tusc2      | 0.0000 | No |
| 47602 | Tusc3      | 0.0000 | No |
| 47603 | Tusc5      | 0.0000 | No |
| 47604 | Tut1       | 0.0000 | No |
| 47605 | Tvp23a     | 0.0000 | No |
| 47606 | Tvp23b     | 0.0000 | No |
| 47607 | Tvp23bos   | 0.0000 | No |

|       |         |        |    |
|-------|---------|--------|----|
| 47608 | Twf1    | 0.0000 | No |
| 47609 | Twf2    | 0.0000 | No |
| 47610 | Twist1  | 0.0000 | No |
| 47611 | Twist2  | 0.0000 | No |
| 47612 | Twistnb | 0.0000 | No |
| 47613 | Twnk    | 0.0000 | No |
| 47614 | Twsg1   | 0.0000 | No |
| 47615 | Txlna   | 0.0000 | No |
| 47616 | Txlnb   | 0.0000 | No |
| 47617 | Txlng   | 0.0000 | No |
| 47618 | Txn1    | 0.0000 | No |
| 47619 | Txn2    | 0.0000 | No |
| 47620 | Txndc11 | 0.0000 | No |
| 47621 | Txndc12 | 0.0000 | No |
| 47622 | Txndc15 | 0.0000 | No |
| 47623 | Txndc16 | 0.0000 | No |
| 47624 | Txndc17 | 0.0000 | No |
| 47625 | Txndc5  | 0.0000 | No |
| 47626 | Txndc8  | 0.0000 | No |
| 47627 | Txndc9  | 0.0000 | No |
| 47628 | Txnip   | 0.0000 | No |
| 47629 | Txn11   | 0.0000 | No |
| 47630 | Txn14a  | 0.0000 | No |
| 47631 | Txn14b  | 0.0000 | No |
| 47632 | Txn-ps1 | 0.0000 | No |
| 47633 | Txnrd1  | 0.0000 | No |
| 47634 | Txnrd2  | 0.0000 | No |
| 47635 | Txnrd3  | 0.0000 | No |
| 47636 | Tyk2    | 0.0000 | No |
| 47637 | Tymp    | 0.0000 | No |
| 47638 | Tyms    | 0.0000 | No |
| 47639 | Tyro3   | 0.0000 | No |
| 47640 | Tyrl1   | 0.0000 | No |
| 47641 | Tysnd1  | 0.0000 | No |
| 47642 | Tyw1    | 0.0000 | No |
| 47643 | Tyw3    | 0.0000 | No |
| 47644 | Tyw5    | 0.0000 | No |
| 47645 | U1      | 0.0000 | No |
| 47646 | U2      | 0.0000 | No |
| 47647 | U2af1   | 0.0000 | No |
| 47648 | U2af114 | 0.0000 | No |
| 47649 | U2af2   | 0.0000 | No |
| 47650 | U2surp  | 0.0000 | No |
| 47651 | U3      | 0.0000 | No |
| 47652 | U6      | 0.0000 | No |
| 47653 | U90926  | 0.0000 | No |

|       |           |        |    |
|-------|-----------|--------|----|
| 47654 | Uaca      | 0.0000 | No |
| 47655 | Uap1      | 0.0000 | No |
| 47656 | Uap11     | 0.0000 | No |
| 47657 | Uba1      | 0.0000 | No |
| 47658 | Uba1y     | 0.0000 | No |
| 47659 | Uba1y-ps1 | 0.0000 | No |
| 47660 | Uba1y-ps2 | 0.0000 | No |
| 47661 | Uba2      | 0.0000 | No |
| 47662 | Uba3      | 0.0000 | No |
| 47663 | Uba5      | 0.0000 | No |
| 47664 | Uba52     | 0.0000 | No |
| 47665 | Uba6      | 0.0000 | No |
| 47666 | Uba7      | 0.0000 | No |
| 47667 | Uba1      | 0.0000 | No |
| 47668 | Uba2      | 0.0000 | No |
| 47669 | Uba1d1    | 0.0000 | No |
| 47670 | Uba1d2    | 0.0000 | No |
| 47671 | Uba1p1    | 0.0000 | No |
| 47672 | Uba1p11   | 0.0000 | No |
| 47673 | Uba1p2    | 0.0000 | No |
| 47674 | Uba1p21   | 0.0000 | No |
| 47675 | Ubb       | 0.0000 | No |
| 47676 | Ubc       | 0.0000 | No |
| 47677 | Ubd       | 0.0000 | No |
| 47678 | Ube2a     | 0.0000 | No |
| 47679 | Ube2b     | 0.0000 | No |
| 47680 | Ube2c     | 0.0000 | No |
| 47681 | Ube2cbp   | 0.0000 | No |
| 47682 | Ube2d1    | 0.0000 | No |
| 47683 | Ube2d2a   | 0.0000 | No |
| 47684 | Ube2d2b   | 0.0000 | No |
| 47685 | Ube2d3    | 0.0000 | No |
| 47686 | Ube2d4    | 0.0000 | No |
| 47687 | Ube2dn11  | 0.0000 | No |
| 47688 | Ube2dn12  | 0.0000 | No |
| 47689 | Ube2d-ps  | 0.0000 | No |
| 47690 | Ube2e1    | 0.0000 | No |
| 47691 | Ube2e2    | 0.0000 | No |
| 47692 | Ube2e3    | 0.0000 | No |
| 47693 | Ube2f     | 0.0000 | No |
| 47694 | Ube2g1    | 0.0000 | No |
| 47695 | Ube2g2    | 0.0000 | No |
| 47696 | Ube2h     | 0.0000 | No |
| 47697 | Ube2i     | 0.0000 | No |
| 47698 | Ube2j1    | 0.0000 | No |
| 47699 | Ube2j2    | 0.0000 | No |

|       |            |        |    |
|-------|------------|--------|----|
| 47700 | Ube2k      | 0.0000 | No |
| 47701 | Ube2l3     | 0.0000 | No |
| 47702 | Ube2l3-ps1 | 0.0000 | No |
| 47703 | Ube2l6     | 0.0000 | No |
| 47704 | Ube2m      | 0.0000 | No |
| 47705 | Ube2n      | 0.0000 | No |
| 47706 | Ube2nl     | 0.0000 | No |
| 47707 | Ube2n-ps1  | 0.0000 | No |
| 47708 | Ube2o      | 0.0000 | No |
| 47709 | Ube2q1     | 0.0000 | No |
| 47710 | Ube2q2     | 0.0000 | No |
| 47711 | Ube2ql1    | 0.0000 | No |
| 47712 | Ube2r2     | 0.0000 | No |
| 47713 | Ube2s      | 0.0000 | No |
| 47714 | Ube2t      | 0.0000 | No |
| 47715 | Ube2u      | 0.0000 | No |
| 47716 | Ube2uos    | 0.0000 | No |
| 47717 | Ube2v1     | 0.0000 | No |
| 47718 | Ube2v2     | 0.0000 | No |
| 47719 | Ube2w      | 0.0000 | No |
| 47720 | Ube2z      | 0.0000 | No |
| 47721 | Ube3a      | 0.0000 | No |
| 47722 | Ube3b      | 0.0000 | No |
| 47723 | Ube3c      | 0.0000 | No |
| 47724 | Ube4a      | 0.0000 | No |
| 47725 | Ube4b      | 0.0000 | No |
| 47726 | Ube4bos1   | 0.0000 | No |
| 47727 | Ube4bos2   | 0.0000 | No |
| 47728 | Ube4bos3   | 0.0000 | No |
| 47729 | Ubiad1     | 0.0000 | No |
| 47730 | Ubl3       | 0.0000 | No |
| 47731 | Ubl4a      | 0.0000 | No |
| 47732 | Ubl5       | 0.0000 | No |
| 47733 | Ubl7       | 0.0000 | No |
| 47734 | Ubn1       | 0.0000 | No |
| 47735 | Ubn2       | 0.0000 | No |
| 47736 | Ubox5      | 0.0000 | No |
| 47737 | Ubp1       | 0.0000 | No |
| 47738 | Ubqln1     | 0.0000 | No |
| 47739 | Ubqln2     | 0.0000 | No |
| 47740 | Ubqln4     | 0.0000 | No |
| 47741 | Ubqlnl     | 0.0000 | No |
| 47742 | Ubr1       | 0.0000 | No |
| 47743 | Ubr2       | 0.0000 | No |
| 47744 | Ubr3       | 0.0000 | No |
| 47745 | Ubr4       | 0.0000 | No |

|       |         |        |    |
|-------|---------|--------|----|
| 47746 | Ubr5    | 0.0000 | No |
| 47747 | Ubr7    | 0.0000 | No |
| 47748 | Ubsd1   | 0.0000 | No |
| 47749 | Ubsd2   | 0.0000 | No |
| 47750 | Ubtf    | 0.0000 | No |
| 47751 | Ubtfl1  | 0.0000 | No |
| 47752 | Ubxn1   | 0.0000 | No |
| 47753 | Ubxn10  | 0.0000 | No |
| 47754 | Ubxn11  | 0.0000 | No |
| 47755 | Ubxn2a  | 0.0000 | No |
| 47756 | Ubxn2b  | 0.0000 | No |
| 47757 | Ubxn6   | 0.0000 | No |
| 47758 | Ubxn7   | 0.0000 | No |
| 47759 | Ubxn8   | 0.0000 | No |
| 47760 | Uchl1os | 0.0000 | No |
| 47761 | Uchl3   | 0.0000 | No |
| 47762 | Uchl4   | 0.0000 | No |
| 47763 | Uchl5   | 0.0000 | No |
| 47764 | Uck1    | 0.0000 | No |
| 47765 | Uck2    | 0.0000 | No |
| 47766 | Uckl1   | 0.0000 | No |
| 47767 | Uckl1os | 0.0000 | No |
| 47768 | Ucma    | 0.0000 | No |
| 47769 | Ucn     | 0.0000 | No |
| 47770 | Ucn2    | 0.0000 | No |
| 47771 | Ucn3    | 0.0000 | No |
| 47772 | Ucp2    | 0.0000 | No |
| 47773 | Ucp3    | 0.0000 | No |
| 47774 | Uevld   | 0.0000 | No |
| 47775 | Ufc1    | 0.0000 | No |
| 47776 | Ufd11   | 0.0000 | No |
| 47777 | Ufl1    | 0.0000 | No |
| 47778 | Ufm1    | 0.0000 | No |
| 47779 | Ufsp2   | 0.0000 | No |
| 47780 | Ugcg    | 0.0000 | No |
| 47781 | Ugdh    | 0.0000 | No |
| 47782 | Uggt1   | 0.0000 | No |
| 47783 | Uggt2   | 0.0000 | No |
| 47784 | Ugp2    | 0.0000 | No |
| 47785 | Ugt1a1  | 0.0000 | No |
| 47786 | Ugt1a10 | 0.0000 | No |
| 47787 | Ugt1a6a | 0.0000 | No |
| 47788 | Ugt1a7c | 0.0000 | No |
| 47789 | Ugt1a8  | 0.0000 | No |
| 47790 | Ugt1a9  | 0.0000 | No |
| 47791 | Ugt2a1  | 0.0000 | No |

|       |           |        |    |
|-------|-----------|--------|----|
| 47792 | Ugt2a2    | 0.0000 | No |
| 47793 | Ugt2a3    | 0.0000 | No |
| 47794 | Ugt2b1    | 0.0000 | No |
| 47795 | Ugt2b35   | 0.0000 | No |
| 47796 | Ugt2b37   | 0.0000 | No |
| 47797 | Ugt2b38   | 0.0000 | No |
| 47798 | Ugt2b5    | 0.0000 | No |
| 47799 | Ugt3a1    | 0.0000 | No |
| 47800 | Ugt3a2    | 0.0000 | No |
| 47801 | Uhmk1     | 0.0000 | No |
| 47802 | Uhrf1     | 0.0000 | No |
| 47803 | Uhrf1bp1  | 0.0000 | No |
| 47804 | Uhrf1bp11 | 0.0000 | No |
| 47805 | Uhrf2     | 0.0000 | No |
| 47806 | Uimc1     | 0.0000 | No |
| 47807 | Ulbp1     | 0.0000 | No |
| 47808 | Ulk1      | 0.0000 | No |
| 47809 | Ulk2      | 0.0000 | No |
| 47810 | Ulk3      | 0.0000 | No |
| 47811 | Ulk4      | 0.0000 | No |
| 47812 | Umodl1    | 0.0000 | No |
| 47813 | Umps      | 0.0000 | No |
| 47814 | Unc119    | 0.0000 | No |
| 47815 | Unc119b   | 0.0000 | No |
| 47816 | Unc13a    | 0.0000 | No |
| 47817 | Unc13b    | 0.0000 | No |
| 47818 | Unc13c    | 0.0000 | No |
| 47819 | Unc13d    | 0.0000 | No |
| 47820 | Unc45a    | 0.0000 | No |
| 47821 | Unc45b    | 0.0000 | No |
| 47822 | Unc45bos  | 0.0000 | No |
| 47823 | Unc50     | 0.0000 | No |
| 47824 | Unc5a     | 0.0000 | No |
| 47825 | Unc5b     | 0.0000 | No |
| 47826 | Unc5c     | 0.0000 | No |
| 47827 | Unc5d     | 0.0000 | No |
| 47828 | Unc79     | 0.0000 | No |
| 47829 | Unc93a    | 0.0000 | No |
| 47830 | Uncx      | 0.0000 | No |
| 47831 | Ung       | 0.0000 | No |
| 47832 | Unk       | 0.0000 | No |
| 47833 | Unkl      | 0.0000 | No |
| 47834 | Uox       | 0.0000 | No |
| 47835 | Upb1      | 0.0000 | No |
| 47836 | Upf1      | 0.0000 | No |
| 47837 | Upf2      | 0.0000 | No |



|       |           |        |    |
|-------|-----------|--------|----|
| 47838 | Upf3a     | 0.0000 | No |
| 47839 | Upf3b     | 0.0000 | No |
| 47840 | Upk1a     | 0.0000 | No |
| 47841 | Upk1b     | 0.0000 | No |
| 47842 | Upk2      | 0.0000 | No |
| 47843 | Upk3a     | 0.0000 | No |
| 47844 | Upk3b     | 0.0000 | No |
| 47845 | Upk3bl    | 0.0000 | No |
| 47846 | Upp1      | 0.0000 | No |
| 47847 | Upp2      | 0.0000 | No |
| 47848 | Uprt      | 0.0000 | No |
| 47849 | Uqcc1     | 0.0000 | No |
| 47850 | Uqcc2     | 0.0000 | No |
| 47851 | Uqcc3     | 0.0000 | No |
| 47852 | Uqcr10    | 0.0000 | No |
| 47853 | Uqcr11    | 0.0000 | No |
| 47854 | Uqcrb     | 0.0000 | No |
| 47855 | Uqcre1    | 0.0000 | No |
| 47856 | Uqcre2    | 0.0000 | No |
| 47857 | Uqcrfs1   | 0.0000 | No |
| 47858 | Uqcrh     | 0.0000 | No |
| 47859 | Uqcrh-ps1 | 0.0000 | No |
| 47860 | Uqcrh-ps2 | 0.0000 | No |
| 47861 | Uqcrq     | 0.0000 | No |
| 47862 | Urad      | 0.0000 | No |
| 47863 | Urah      | 0.0000 | No |
| 47864 | Urb1      | 0.0000 | No |
| 47865 | Urb2      | 0.0000 | No |
| 47866 | Urgcp     | 0.0000 | No |
| 47867 | Uri1      | 0.0000 | No |
| 47868 | Urm1      | 0.0000 | No |
| 47869 | Uroc1     | 0.0000 | No |
| 47870 | Urod      | 0.0000 | No |
| 47871 | Uros      | 0.0000 | No |
| 47872 | Usb1      | 0.0000 | No |
| 47873 | Use1      | 0.0000 | No |
| 47874 | Usf1      | 0.0000 | No |
| 47875 | Usf2      | 0.0000 | No |
| 47876 | Usf2-ps1  | 0.0000 | No |
| 47877 | Usf3      | 0.0000 | No |
| 47878 | Ush1c     | 0.0000 | No |
| 47879 | Ush1g     | 0.0000 | No |
| 47880 | Ush2a     | 0.0000 | No |
| 47881 | Ushbp1    | 0.0000 | No |
| 47882 | Usmg5     | 0.0000 | No |
| 47883 | Uso1      | 0.0000 | No |

|       |            |        |    |
|-------|------------|--------|----|
| 47884 | Usp1       | 0.0000 | No |
| 47885 | Usp10      | 0.0000 | No |
| 47886 | Usp11      | 0.0000 | No |
| 47887 | Usp12      | 0.0000 | No |
| 47888 | Usp14      | 0.0000 | No |
| 47889 | Usp15      | 0.0000 | No |
| 47890 | Usp16      | 0.0000 | No |
| 47891 | Usp17la    | 0.0000 | No |
| 47892 | Usp17lb    | 0.0000 | No |
| 47893 | Usp17lc    | 0.0000 | No |
| 47894 | Usp17ld    | 0.0000 | No |
| 47895 | Usp17le    | 0.0000 | No |
| 47896 | Usp17le-ps | 0.0000 | No |
| 47897 | Usp18      | 0.0000 | No |
| 47898 | Usp19      | 0.0000 | No |
| 47899 | Usp2       | 0.0000 | No |
| 47900 | Usp20      | 0.0000 | No |
| 47901 | Usp21      | 0.0000 | No |
| 47902 | Usp22      | 0.0000 | No |
| 47903 | Usp24      | 0.0000 | No |
| 47904 | Usp25      | 0.0000 | No |
| 47905 | Usp27x     | 0.0000 | No |
| 47906 | Usp28      | 0.0000 | No |
| 47907 | Usp29      | 0.0000 | No |
| 47908 | Usp3       | 0.0000 | No |
| 47909 | Usp30      | 0.0000 | No |
| 47910 | Usp31      | 0.0000 | No |
| 47911 | Usp32      | 0.0000 | No |
| 47912 | Usp33      | 0.0000 | No |
| 47913 | Usp34      | 0.0000 | No |
| 47914 | Usp35      | 0.0000 | No |
| 47915 | Usp36      | 0.0000 | No |
| 47916 | Usp37      | 0.0000 | No |
| 47917 | Usp38      | 0.0000 | No |
| 47918 | Usp39      | 0.0000 | No |
| 47919 | Usp4       | 0.0000 | No |
| 47920 | Usp40      | 0.0000 | No |
| 47921 | Usp42      | 0.0000 | No |
| 47922 | Usp43      | 0.0000 | No |
| 47923 | Usp44      | 0.0000 | No |
| 47924 | Usp45      | 0.0000 | No |
| 47925 | Usp46      | 0.0000 | No |
| 47926 | Usp46os1   | 0.0000 | No |
| 47927 | Usp46os2   | 0.0000 | No |
| 47928 | Usp47      | 0.0000 | No |
| 47929 | Usp48      | 0.0000 | No |

|       |            |        |    |
|-------|------------|--------|----|
| 47930 | Usp49      | 0.0000 | No |
| 47931 | Usp5       | 0.0000 | No |
| 47932 | Usp50      | 0.0000 | No |
| 47933 | Usp51      | 0.0000 | No |
| 47934 | Usp53      | 0.0000 | No |
| 47935 | Usp54      | 0.0000 | No |
| 47936 | Usp6nl     | 0.0000 | No |
| 47937 | Usp7       | 0.0000 | No |
| 47938 | Usp8       | 0.0000 | No |
| 47939 | Usp9x      | 0.0000 | No |
| 47940 | Usp11      | 0.0000 | No |
| 47941 | Ust        | 0.0000 | No |
| 47942 | Utf1       | 0.0000 | No |
| 47943 | Utp111     | 0.0000 | No |
| 47944 | Utp14a     | 0.0000 | No |
| 47945 | Utp14b     | 0.0000 | No |
| 47946 | Utp14b-ps1 | 0.0000 | No |
| 47947 | Utp15      | 0.0000 | No |
| 47948 | Utp18      | 0.0000 | No |
| 47949 | Utp20      | 0.0000 | No |
| 47950 | Utp23      | 0.0000 | No |
| 47951 | Utp3       | 0.0000 | No |
| 47952 | Utp6       | 0.0000 | No |
| 47953 | Uts2b      | 0.0000 | No |
| 47954 | Uts2r      | 0.0000 | No |
| 47955 | Uty        | 0.0000 | No |
| 47956 | Uvrag      | 0.0000 | No |
| 47957 | Uvssa      | 0.0000 | No |
| 47958 | Uxs1       | 0.0000 | No |
| 47959 | Uxt        | 0.0000 | No |
| 47960 | V1ra8      | 0.0000 | No |
| 47961 | V1rd19     | 0.0000 | No |
| 47962 | V1rg10     | 0.0000 | No |
| 47963 | Vac14      | 0.0000 | No |
| 47964 | Vamp1      | 0.0000 | No |
| 47965 | Vamp2      | 0.0000 | No |
| 47966 | Vamp3      | 0.0000 | No |
| 47967 | Vamp4      | 0.0000 | No |
| 47968 | Vamp5      | 0.0000 | No |
| 47969 | Vamp7      | 0.0000 | No |
| 47970 | Vamp7-ps   | 0.0000 | No |
| 47971 | Vamp8      | 0.0000 | No |
| 47972 | Vangl1     | 0.0000 | No |
| 47973 | Vangl2     | 0.0000 | No |
| 47974 | Vapa       | 0.0000 | No |
| 47975 | Vapb       | 0.0000 | No |

|       |           |        |    |
|-------|-----------|--------|----|
| 47976 | Vars      | 0.0000 | No |
| 47977 | Vars2     | 0.0000 | No |
| 47978 | Vash1     | 0.0000 | No |
| 47979 | Vash2     | 0.0000 | No |
| 47980 | Vasn      | 0.0000 | No |
| 47981 | Vasp      | 0.0000 | No |
| 47982 | Vat1      | 0.0000 | No |
| 47983 | Vat11     | 0.0000 | No |
| 47984 | Vaultrc5  | 0.0000 | No |
| 47985 | Vav1      | 0.0000 | No |
| 47986 | Vav2      | 0.0000 | No |
| 47987 | Vav3      | 0.0000 | No |
| 47988 | Vax1      | 0.0000 | No |
| 47989 | Vax2      | 0.0000 | No |
| 47990 | Vbp1      | 0.0000 | No |
| 47991 | Vcam1     | 0.0000 | No |
| 47992 | Vcan      | 0.0000 | No |
| 47993 | Vcp       | 0.0000 | No |
| 47994 | Vcpip1    | 0.0000 | No |
| 47995 | Vcpkmt    | 0.0000 | No |
| 47996 | Vcp-rs    | 0.0000 | No |
| 47997 | Vdac1     | 0.0000 | No |
| 47998 | Vdac2     | 0.0000 | No |
| 47999 | Vdac3     | 0.0000 | No |
| 48000 | Vdac3-ps1 | 0.0000 | No |
| 48001 | Vdr       | 0.0000 | No |
| 48002 | Vegfa     | 0.0000 | No |
| 48003 | Vegfb     | 0.0000 | No |
| 48004 | Vegfd     | 0.0000 | No |
| 48005 | VeZF1     | 0.0000 | No |
| 48006 | VeZt      | 0.0000 | No |
| 48007 | Vgf       | 0.0000 | No |
| 48008 | Vgll2     | 0.0000 | No |
| 48009 | Vgll3     | 0.0000 | No |
| 48010 | Vhl       | 0.0000 | No |
| 48011 | Vhl-ps1   | 0.0000 | No |
| 48012 | Vil1      | 0.0000 | No |
| 48013 | Vill      | 0.0000 | No |
| 48014 | Vim       | 0.0000 | No |
| 48015 | Vip       | 0.0000 | No |
| 48016 | Vipas39   | 0.0000 | No |
| 48017 | Vipr1     | 0.0000 | No |
| 48018 | Vipr2     | 0.0000 | No |
| 48019 | Vis1      | 0.0000 | No |
| 48020 | Vit       | 0.0000 | No |
| 48021 | Vkorc1    | 0.0000 | No |

|       |          |        |    |
|-------|----------|--------|----|
| 48022 | Vkorc111 | 0.0000 | No |
| 48023 | Vldlr    | 0.0000 | No |
| 48024 | Vma21    | 0.0000 | No |
| 48025 | Vmac     | 0.0000 | No |
| 48026 | Vmnlr1   | 0.0000 | No |
| 48027 | Vmnlr10  | 0.0000 | No |
| 48028 | Vmnlr100 | 0.0000 | No |
| 48029 | Vmnlr101 | 0.0000 | No |
| 48030 | Vmnlr103 | 0.0000 | No |
| 48031 | Vmnlr104 | 0.0000 | No |
| 48032 | Vmnlr107 | 0.0000 | No |
| 48033 | Vmnlr11  | 0.0000 | No |
| 48034 | Vmnlr111 | 0.0000 | No |
| 48035 | Vmnlr112 | 0.0000 | No |
| 48036 | Vmnlr113 | 0.0000 | No |
| 48037 | Vmnlr114 | 0.0000 | No |
| 48038 | Vmnlr115 | 0.0000 | No |
| 48039 | Vmnlr116 | 0.0000 | No |
| 48040 | Vmnlr117 | 0.0000 | No |
| 48041 | Vmnlr118 | 0.0000 | No |
| 48042 | Vmnlr119 | 0.0000 | No |
| 48043 | Vmnlr120 | 0.0000 | No |
| 48044 | Vmnlr121 | 0.0000 | No |
| 48045 | Vmnlr122 | 0.0000 | No |
| 48046 | Vmnlr123 | 0.0000 | No |
| 48047 | Vmnlr124 | 0.0000 | No |
| 48048 | Vmnlr125 | 0.0000 | No |
| 48049 | Vmnlr126 | 0.0000 | No |
| 48050 | Vmnlr127 | 0.0000 | No |
| 48051 | Vmnlr128 | 0.0000 | No |
| 48052 | Vmnlr129 | 0.0000 | No |
| 48053 | Vmnlr13  | 0.0000 | No |
| 48054 | Vmnlr130 | 0.0000 | No |
| 48055 | Vmnlr131 | 0.0000 | No |
| 48056 | Vmnlr132 | 0.0000 | No |
| 48057 | Vmnlr135 | 0.0000 | No |
| 48058 | Vmnlr137 | 0.0000 | No |
| 48059 | Vmnlr138 | 0.0000 | No |
| 48060 | Vmnlr139 | 0.0000 | No |
| 48061 | Vmnlr14  | 0.0000 | No |
| 48062 | Vmnlr142 | 0.0000 | No |
| 48063 | Vmnlr143 | 0.0000 | No |
| 48064 | Vmnlr148 | 0.0000 | No |
| 48065 | Vmnlr149 | 0.0000 | No |
| 48066 | Vmnlr15  | 0.0000 | No |
| 48067 | Vmnlr151 | 0.0000 | No |

|       |             |        |    |
|-------|-------------|--------|----|
| 48068 | Vmn1r152    | 0.0000 | No |
| 48069 | Vmn1r155    | 0.0000 | No |
| 48070 | Vmn1r157    | 0.0000 | No |
| 48071 | Vmn1r159    | 0.0000 | No |
| 48072 | Vmn1r16     | 0.0000 | No |
| 48073 | Vmn1r160    | 0.0000 | No |
| 48074 | Vmn1r163    | 0.0000 | No |
| 48075 | Vmn1r165    | 0.0000 | No |
| 48076 | Vmn1r166    | 0.0000 | No |
| 48077 | Vmn1r167    | 0.0000 | No |
| 48078 | Vmn1r168    | 0.0000 | No |
| 48079 | Vmn1r169    | 0.0000 | No |
| 48080 | Vmn1r17     | 0.0000 | No |
| 48081 | Vmn1r170    | 0.0000 | No |
| 48082 | Vmn1r171    | 0.0000 | No |
| 48083 | Vmn1r172    | 0.0000 | No |
| 48084 | Vmn1r173    | 0.0000 | No |
| 48085 | Vmn1r174    | 0.0000 | No |
| 48086 | Vmn1r175    | 0.0000 | No |
| 48087 | Vmn1r176    | 0.0000 | No |
| 48088 | Vmn1r177    | 0.0000 | No |
| 48089 | Vmn1r18     | 0.0000 | No |
| 48090 | Vmn1r181    | 0.0000 | No |
| 48091 | Vmn1r183    | 0.0000 | No |
| 48092 | Vmn1r185    | 0.0000 | No |
| 48093 | Vmn1r186    | 0.0000 | No |
| 48094 | Vmn1r188    | 0.0000 | No |
| 48095 | Vmn1r189    | 0.0000 | No |
| 48096 | Vmn1r19     | 0.0000 | No |
| 48097 | Vmn1r190-ps | 0.0000 | No |
| 48098 | Vmn1r191    | 0.0000 | No |
| 48099 | Vmn1r192    | 0.0000 | No |
| 48100 | Vmn1r194    | 0.0000 | No |
| 48101 | Vmn1r195    | 0.0000 | No |
| 48102 | Vmn1r196    | 0.0000 | No |
| 48103 | Vmn1r197    | 0.0000 | No |
| 48104 | Vmn1r198    | 0.0000 | No |
| 48105 | Vmn1r2      | 0.0000 | No |
| 48106 | Vmn1r20     | 0.0000 | No |
| 48107 | Vmn1r200    | 0.0000 | No |
| 48108 | Vmn1r202    | 0.0000 | No |
| 48109 | Vmn1r203    | 0.0000 | No |
| 48110 | Vmn1r204    | 0.0000 | No |
| 48111 | Vmn1r205    | 0.0000 | No |
| 48112 | Vmn1r206    | 0.0000 | No |
| 48113 | Vmn1r207-ps | 0.0000 | No |

|       |             |        |    |
|-------|-------------|--------|----|
| 48114 | Vmn1r208    | 0.0000 | No |
| 48115 | Vmn1r209    | 0.0000 | No |
| 48116 | Vmn1r21     | 0.0000 | No |
| 48117 | Vmn1r210    | 0.0000 | No |
| 48118 | Vmn1r211    | 0.0000 | No |
| 48119 | Vmn1r212    | 0.0000 | No |
| 48120 | Vmn1r213    | 0.0000 | No |
| 48121 | Vmn1r214    | 0.0000 | No |
| 48122 | Vmn1r215    | 0.0000 | No |
| 48123 | Vmn1r216    | 0.0000 | No |
| 48124 | Vmn1r218    | 0.0000 | No |
| 48125 | Vmn1r22     | 0.0000 | No |
| 48126 | Vmn1r221    | 0.0000 | No |
| 48127 | Vmn1r222    | 0.0000 | No |
| 48128 | Vmn1r223    | 0.0000 | No |
| 48129 | Vmn1r224    | 0.0000 | No |
| 48130 | Vmn1r225    | 0.0000 | No |
| 48131 | Vmn1r226    | 0.0000 | No |
| 48132 | Vmn1r227    | 0.0000 | No |
| 48133 | Vmn1r229    | 0.0000 | No |
| 48134 | Vmn1r23     | 0.0000 | No |
| 48135 | Vmn1r230    | 0.0000 | No |
| 48136 | Vmn1r231    | 0.0000 | No |
| 48137 | Vmn1r232    | 0.0000 | No |
| 48138 | Vmn1r233    | 0.0000 | No |
| 48139 | Vmn1r235    | 0.0000 | No |
| 48140 | Vmn1r236    | 0.0000 | No |
| 48141 | Vmn1r238    | 0.0000 | No |
| 48142 | Vmn1r239-ps | 0.0000 | No |
| 48143 | Vmn1r24     | 0.0000 | No |
| 48144 | Vmn1r26     | 0.0000 | No |
| 48145 | Vmn1r27     | 0.0000 | No |
| 48146 | Vmn1r28     | 0.0000 | No |
| 48147 | Vmn1r29     | 0.0000 | No |
| 48148 | Vmn1r3      | 0.0000 | No |
| 48149 | Vmn1r30     | 0.0000 | No |
| 48150 | Vmn1r31     | 0.0000 | No |
| 48151 | Vmn1r32     | 0.0000 | No |
| 48152 | Vmn1r34     | 0.0000 | No |
| 48153 | Vmn1r35     | 0.0000 | No |
| 48154 | Vmn1r36     | 0.0000 | No |
| 48155 | Vmn1r37     | 0.0000 | No |
| 48156 | Vmn1r38     | 0.0000 | No |
| 48157 | Vmn1r39     | 0.0000 | No |
| 48158 | Vmn1r4      | 0.0000 | No |
| 48159 | Vmn1r40     | 0.0000 | No |

|       |           |        |    |
|-------|-----------|--------|----|
| 48160 | Vmn1r41   | 0.0000 | No |
| 48161 | Vmn1r42   | 0.0000 | No |
| 48162 | Vmn1r43   | 0.0000 | No |
| 48163 | Vmn1r44   | 0.0000 | No |
| 48164 | Vmn1r45   | 0.0000 | No |
| 48165 | Vmn1r47   | 0.0000 | No |
| 48166 | Vmn1r48   | 0.0000 | No |
| 48167 | Vmn1r49   | 0.0000 | No |
| 48168 | Vmn1r5    | 0.0000 | No |
| 48169 | Vmn1r51   | 0.0000 | No |
| 48170 | Vmn1r52   | 0.0000 | No |
| 48171 | Vmn1r53   | 0.0000 | No |
| 48172 | Vmn1r54   | 0.0000 | No |
| 48173 | Vmn1r55   | 0.0000 | No |
| 48174 | Vmn1r59   | 0.0000 | No |
| 48175 | Vmn1r6    | 0.0000 | No |
| 48176 | Vmn1r60   | 0.0000 | No |
| 48177 | Vmn1r61   | 0.0000 | No |
| 48178 | Vmn1r62   | 0.0000 | No |
| 48179 | Vmn1r63   | 0.0000 | No |
| 48180 | Vmn1r64   | 0.0000 | No |
| 48181 | Vmn1r65   | 0.0000 | No |
| 48182 | Vmn1r67   | 0.0000 | No |
| 48183 | Vmn1r7    | 0.0000 | No |
| 48184 | Vmn1r70   | 0.0000 | No |
| 48185 | Vmn1r71   | 0.0000 | No |
| 48186 | Vmn1r72   | 0.0000 | No |
| 48187 | Vmn1r77   | 0.0000 | No |
| 48188 | Vmn1r78   | 0.0000 | No |
| 48189 | Vmn1r79   | 0.0000 | No |
| 48190 | Vmn1r8    | 0.0000 | No |
| 48191 | Vmn1r80   | 0.0000 | No |
| 48192 | Vmn1r81   | 0.0000 | No |
| 48193 | Vmn1r83   | 0.0000 | No |
| 48194 | Vmn1r84   | 0.0000 | No |
| 48195 | Vmn1r85   | 0.0000 | No |
| 48196 | Vmn1r86   | 0.0000 | No |
| 48197 | Vmn1r87   | 0.0000 | No |
| 48198 | Vmn1r88   | 0.0000 | No |
| 48199 | Vmn1r9    | 0.0000 | No |
| 48200 | Vmn1r90   | 0.0000 | No |
| 48201 | Vmn1r91   | 0.0000 | No |
| 48202 | Vmn1r93   | 0.0000 | No |
| 48203 | Vmn1r94   | 0.0000 | No |
| 48204 | Vmn1r95   | 0.0000 | No |
| 48205 | Vmn1r-ps1 | 0.0000 | No |



|       |             |        |    |
|-------|-------------|--------|----|
| 48206 | Vmn1r-ps103 | 0.0000 | No |
| 48207 | Vmn1r-ps106 | 0.0000 | No |
| 48208 | Vmn1r-ps107 | 0.0000 | No |
| 48209 | Vmn1r-ps108 | 0.0000 | No |
| 48210 | Vmn1r-ps109 | 0.0000 | No |
| 48211 | Vmn1r-ps11  | 0.0000 | No |
| 48212 | Vmn1r-ps110 | 0.0000 | No |
| 48213 | Vmn1r-ps111 | 0.0000 | No |
| 48214 | Vmn1r-ps112 | 0.0000 | No |
| 48215 | Vmn1r-ps113 | 0.0000 | No |
| 48216 | Vmn1r-ps114 | 0.0000 | No |
| 48217 | Vmn1r-ps116 | 0.0000 | No |
| 48218 | Vmn1r-ps120 | 0.0000 | No |
| 48219 | Vmn1r-ps123 | 0.0000 | No |
| 48220 | Vmn1r-ps126 | 0.0000 | No |
| 48221 | Vmn1r-ps127 | 0.0000 | No |
| 48222 | Vmn1r-ps128 | 0.0000 | No |
| 48223 | Vmn1r-ps13  | 0.0000 | No |
| 48224 | Vmn1r-ps132 | 0.0000 | No |
| 48225 | Vmn1r-ps135 | 0.0000 | No |
| 48226 | Vmn1r-ps14  | 0.0000 | No |
| 48227 | Vmn1r-ps141 | 0.0000 | No |
| 48228 | Vmn1r-ps142 | 0.0000 | No |
| 48229 | Vmn1r-ps143 | 0.0000 | No |
| 48230 | Vmn1r-ps144 | 0.0000 | No |
| 48231 | Vmn1r-ps145 | 0.0000 | No |
| 48232 | Vmn1r-ps146 | 0.0000 | No |
| 48233 | Vmn1r-ps147 | 0.0000 | No |
| 48234 | Vmn1r-ps148 | 0.0000 | No |
| 48235 | Vmn1r-ps149 | 0.0000 | No |
| 48236 | Vmn1r-ps15  | 0.0000 | No |
| 48237 | Vmn1r-ps151 | 0.0000 | No |
| 48238 | Vmn1r-ps152 | 0.0000 | No |
| 48239 | Vmn1r-ps17  | 0.0000 | No |
| 48240 | Vmn1r-ps18  | 0.0000 | No |
| 48241 | Vmn1r-ps19  | 0.0000 | No |
| 48242 | Vmn1r-ps2   | 0.0000 | No |
| 48243 | Vmn1r-ps20  | 0.0000 | No |
| 48244 | Vmn1r-ps21  | 0.0000 | No |
| 48245 | Vmn1r-ps22  | 0.0000 | No |
| 48246 | Vmn1r-ps23  | 0.0000 | No |
| 48247 | Vmn1r-ps24  | 0.0000 | No |
| 48248 | Vmn1r-ps25  | 0.0000 | No |
| 48249 | Vmn1r-ps26  | 0.0000 | No |
| 48250 | Vmn1r-ps27  | 0.0000 | No |
| 48251 | Vmn1r-ps28  | 0.0000 | No |

|       |            |        |    |
|-------|------------|--------|----|
| 48252 | Vmn1r-ps29 | 0.0000 | No |
| 48253 | Vmn1r-ps3  | 0.0000 | No |
| 48254 | Vmn1r-ps31 | 0.0000 | No |
| 48255 | Vmn1r-ps40 | 0.0000 | No |
| 48256 | Vmn1r-ps45 | 0.0000 | No |
| 48257 | Vmn1r-ps46 | 0.0000 | No |
| 48258 | Vmn1r-ps47 | 0.0000 | No |
| 48259 | Vmn1r-ps48 | 0.0000 | No |
| 48260 | Vmn1r-ps49 | 0.0000 | No |
| 48261 | Vmn1r-ps5  | 0.0000 | No |
| 48262 | Vmn1r-ps50 | 0.0000 | No |
| 48263 | Vmn1r-ps51 | 0.0000 | No |
| 48264 | Vmn1r-ps52 | 0.0000 | No |
| 48265 | Vmn1r-ps53 | 0.0000 | No |
| 48266 | Vmn1r-ps55 | 0.0000 | No |
| 48267 | Vmn1r-ps56 | 0.0000 | No |
| 48268 | Vmn1r-ps58 | 0.0000 | No |
| 48269 | Vmn1r-ps6  | 0.0000 | No |
| 48270 | Vmn1r-ps61 | 0.0000 | No |
| 48271 | Vmn1r-ps63 | 0.0000 | No |
| 48272 | Vmn1r-ps64 | 0.0000 | No |
| 48273 | Vmn1r-ps65 | 0.0000 | No |
| 48274 | Vmn1r-ps66 | 0.0000 | No |
| 48275 | Vmn1r-ps67 | 0.0000 | No |
| 48276 | Vmn1r-ps68 | 0.0000 | No |
| 48277 | Vmn1r-ps69 | 0.0000 | No |
| 48278 | Vmn1r-ps7  | 0.0000 | No |
| 48279 | Vmn1r-ps70 | 0.0000 | No |
| 48280 | Vmn1r-ps71 | 0.0000 | No |
| 48281 | Vmn1r-ps73 | 0.0000 | No |
| 48282 | Vmn1r-ps74 | 0.0000 | No |
| 48283 | Vmn1r-ps75 | 0.0000 | No |
| 48284 | Vmn1r-ps76 | 0.0000 | No |
| 48285 | Vmn1r-ps77 | 0.0000 | No |
| 48286 | Vmn1r-ps78 | 0.0000 | No |
| 48287 | Vmn1r-ps79 | 0.0000 | No |
| 48288 | Vmn1r-ps8  | 0.0000 | No |
| 48289 | Vmn1r-ps80 | 0.0000 | No |
| 48290 | Vmn1r-ps83 | 0.0000 | No |
| 48291 | Vmn1r-ps85 | 0.0000 | No |
| 48292 | Vmn1r-ps86 | 0.0000 | No |
| 48293 | Vmn1r-ps92 | 0.0000 | No |
| 48294 | Vmn1r-ps93 | 0.0000 | No |
| 48295 | Vmn1r-ps94 | 0.0000 | No |
| 48296 | Vmn1r-ps95 | 0.0000 | No |
| 48297 | Vmn1r-ps97 | 0.0000 | No |

|       |            |        |    |
|-------|------------|--------|----|
| 48298 | Vmn1r-ps99 | 0.0000 | No |
| 48299 | Vmn2r1     | 0.0000 | No |
| 48300 | Vmn2r10    | 0.0000 | No |
| 48301 | Vmn2r101   | 0.0000 | No |
| 48302 | Vmn2r102   | 0.0000 | No |
| 48303 | Vmn2r103   | 0.0000 | No |
| 48304 | Vmn2r104   | 0.0000 | No |
| 48305 | Vmn2r105   | 0.0000 | No |
| 48306 | Vmn2r106   | 0.0000 | No |
| 48307 | Vmn2r107   | 0.0000 | No |
| 48308 | Vmn2r108   | 0.0000 | No |
| 48309 | Vmn2r109   | 0.0000 | No |
| 48310 | Vmn2r110   | 0.0000 | No |
| 48311 | Vmn2r112   | 0.0000 | No |
| 48312 | Vmn2r113   | 0.0000 | No |
| 48313 | Vmn2r114   | 0.0000 | No |
| 48314 | Vmn2r115   | 0.0000 | No |
| 48315 | Vmn2r116   | 0.0000 | No |
| 48316 | Vmn2r118   | 0.0000 | No |
| 48317 | Vmn2r12    | 0.0000 | No |
| 48318 | Vmn2r121   | 0.0000 | No |
| 48319 | Vmn2r124   | 0.0000 | No |
| 48320 | Vmn2r125   | 0.0000 | No |
| 48321 | Vmn2r13    | 0.0000 | No |
| 48322 | Vmn2r14    | 0.0000 | No |
| 48323 | Vmn2r15    | 0.0000 | No |
| 48324 | Vmn2r16    | 0.0000 | No |
| 48325 | Vmn2r18    | 0.0000 | No |
| 48326 | Vmn2r19    | 0.0000 | No |
| 48327 | Vmn2r2     | 0.0000 | No |
| 48328 | Vmn2r20    | 0.0000 | No |
| 48329 | Vmn2r21    | 0.0000 | No |
| 48330 | Vmn2r22    | 0.0000 | No |
| 48331 | Vmn2r23    | 0.0000 | No |
| 48332 | Vmn2r24    | 0.0000 | No |
| 48333 | Vmn2r25    | 0.0000 | No |
| 48334 | Vmn2r26    | 0.0000 | No |
| 48335 | Vmn2r27    | 0.0000 | No |
| 48336 | Vmn2r28    | 0.0000 | No |
| 48337 | Vmn2r29    | 0.0000 | No |
| 48338 | Vmn2r3     | 0.0000 | No |
| 48339 | Vmn2r32    | 0.0000 | No |
| 48340 | Vmn2r33    | 0.0000 | No |
| 48341 | Vmn2r34    | 0.0000 | No |
| 48342 | Vmn2r35    | 0.0000 | No |
| 48343 | Vmn2r36    | 0.0000 | No |

|       |         |        |    |
|-------|---------|--------|----|
| 48344 | Vmn2r37 | 0.0000 | No |
| 48345 | Vmn2r38 | 0.0000 | No |
| 48346 | Vmn2r39 | 0.0000 | No |
| 48347 | Vmn2r40 | 0.0000 | No |
| 48348 | Vmn2r41 | 0.0000 | No |
| 48349 | Vmn2r42 | 0.0000 | No |
| 48350 | Vmn2r43 | 0.0000 | No |
| 48351 | Vmn2r46 | 0.0000 | No |
| 48352 | Vmn2r47 | 0.0000 | No |
| 48353 | Vmn2r49 | 0.0000 | No |
| 48354 | Vmn2r5  | 0.0000 | No |
| 48355 | Vmn2r50 | 0.0000 | No |
| 48356 | Vmn2r51 | 0.0000 | No |
| 48357 | Vmn2r52 | 0.0000 | No |
| 48358 | Vmn2r53 | 0.0000 | No |
| 48359 | Vmn2r54 | 0.0000 | No |
| 48360 | Vmn2r56 | 0.0000 | No |
| 48361 | Vmn2r57 | 0.0000 | No |
| 48362 | Vmn2r58 | 0.0000 | No |
| 48363 | Vmn2r59 | 0.0000 | No |
| 48364 | Vmn2r6  | 0.0000 | No |
| 48365 | Vmn2r60 | 0.0000 | No |
| 48366 | Vmn2r62 | 0.0000 | No |
| 48367 | Vmn2r63 | 0.0000 | No |
| 48368 | Vmn2r65 | 0.0000 | No |
| 48369 | Vmn2r66 | 0.0000 | No |
| 48370 | Vmn2r67 | 0.0000 | No |
| 48371 | Vmn2r68 | 0.0000 | No |
| 48372 | Vmn2r69 | 0.0000 | No |
| 48373 | Vmn2r70 | 0.0000 | No |
| 48374 | Vmn2r71 | 0.0000 | No |
| 48375 | Vmn2r73 | 0.0000 | No |
| 48376 | Vmn2r74 | 0.0000 | No |
| 48377 | Vmn2r76 | 0.0000 | No |
| 48378 | Vmn2r77 | 0.0000 | No |
| 48379 | Vmn2r78 | 0.0000 | No |
| 48380 | Vmn2r79 | 0.0000 | No |
| 48381 | Vmn2r8  | 0.0000 | No |
| 48382 | Vmn2r80 | 0.0000 | No |
| 48383 | Vmn2r81 | 0.0000 | No |
| 48384 | Vmn2r82 | 0.0000 | No |
| 48385 | Vmn2r83 | 0.0000 | No |
| 48386 | Vmn2r85 | 0.0000 | No |
| 48387 | Vmn2r86 | 0.0000 | No |
| 48388 | Vmn2r87 | 0.0000 | No |
| 48389 | Vmn2r88 | 0.0000 | No |

|       |             |        |    |
|-------|-------------|--------|----|
| 48390 | Vmn2r89     | 0.0000 | No |
| 48391 | Vmn2r9      | 0.0000 | No |
| 48392 | Vmn2r90     | 0.0000 | No |
| 48393 | Vmn2r91     | 0.0000 | No |
| 48394 | Vmn2r92     | 0.0000 | No |
| 48395 | Vmn2r93     | 0.0000 | No |
| 48396 | Vmn2r94     | 0.0000 | No |
| 48397 | Vmn2r95     | 0.0000 | No |
| 48398 | Vmn2r96     | 0.0000 | No |
| 48399 | Vmn2r97     | 0.0000 | No |
| 48400 | Vmn2r98     | 0.0000 | No |
| 48401 | Vmn2r99     | 0.0000 | No |
| 48402 | Vmn2r-ps10  | 0.0000 | No |
| 48403 | Vmn2r-ps104 | 0.0000 | No |
| 48404 | Vmn2r-ps11  | 0.0000 | No |
| 48405 | Vmn2r-ps111 | 0.0000 | No |
| 48406 | Vmn2r-ps114 | 0.0000 | No |
| 48407 | Vmn2r-ps115 | 0.0000 | No |
| 48408 | Vmn2r-ps116 | 0.0000 | No |
| 48409 | Vmn2r-ps117 | 0.0000 | No |
| 48410 | Vmn2r-ps119 | 0.0000 | No |
| 48411 | Vmn2r-ps12  | 0.0000 | No |
| 48412 | Vmn2r-ps120 | 0.0000 | No |
| 48413 | Vmn2r-ps122 | 0.0000 | No |
| 48414 | Vmn2r-ps123 | 0.0000 | No |
| 48415 | Vmn2r-ps124 | 0.0000 | No |
| 48416 | Vmn2r-ps125 | 0.0000 | No |
| 48417 | Vmn2r-ps126 | 0.0000 | No |
| 48418 | Vmn2r-ps127 | 0.0000 | No |
| 48419 | Vmn2r-ps128 | 0.0000 | No |
| 48420 | Vmn2r-ps129 | 0.0000 | No |
| 48421 | Vmn2r-ps13  | 0.0000 | No |
| 48422 | Vmn2r-ps130 | 0.0000 | No |
| 48423 | Vmn2r-ps131 | 0.0000 | No |
| 48424 | Vmn2r-ps132 | 0.0000 | No |
| 48425 | Vmn2r-ps133 | 0.0000 | No |
| 48426 | Vmn2r-ps134 | 0.0000 | No |
| 48427 | Vmn2r-ps149 | 0.0000 | No |
| 48428 | Vmn2r-ps16  | 0.0000 | No |
| 48429 | Vmn2r-ps17  | 0.0000 | No |
| 48430 | Vmn2r-ps18  | 0.0000 | No |
| 48431 | Vmn2r-ps19  | 0.0000 | No |
| 48432 | Vmn2r-ps2   | 0.0000 | No |
| 48433 | Vmn2r-ps20  | 0.0000 | No |
| 48434 | Vmn2r-ps23  | 0.0000 | No |
| 48435 | Vmn2r-ps24  | 0.0000 | No |

|       |            |        |    |
|-------|------------|--------|----|
| 48436 | Vmn2r-ps25 | 0.0000 | No |
| 48437 | Vmn2r-ps26 | 0.0000 | No |
| 48438 | Vmn2r-ps3  | 0.0000 | No |
| 48439 | Vmn2r-ps31 | 0.0000 | No |
| 48440 | Vmn2r-ps32 | 0.0000 | No |
| 48441 | Vmn2r-ps34 | 0.0000 | No |
| 48442 | Vmn2r-ps35 | 0.0000 | No |
| 48443 | Vmn2r-ps36 | 0.0000 | No |
| 48444 | Vmn2r-ps37 | 0.0000 | No |
| 48445 | Vmn2r-ps38 | 0.0000 | No |
| 48446 | Vmn2r-ps4  | 0.0000 | No |
| 48447 | Vmn2r-ps40 | 0.0000 | No |
| 48448 | Vmn2r-ps41 | 0.0000 | No |
| 48449 | Vmn2r-ps42 | 0.0000 | No |
| 48450 | Vmn2r-ps43 | 0.0000 | No |
| 48451 | Vmn2r-ps44 | 0.0000 | No |
| 48452 | Vmn2r-ps45 | 0.0000 | No |
| 48453 | Vmn2r-ps46 | 0.0000 | No |
| 48454 | Vmn2r-ps47 | 0.0000 | No |
| 48455 | Vmn2r-ps49 | 0.0000 | No |
| 48456 | Vmn2r-ps5  | 0.0000 | No |
| 48457 | Vmn2r-ps50 | 0.0000 | No |
| 48458 | Vmn2r-ps51 | 0.0000 | No |
| 48459 | Vmn2r-ps52 | 0.0000 | No |
| 48460 | Vmn2r-ps53 | 0.0000 | No |
| 48461 | Vmn2r-ps55 | 0.0000 | No |
| 48462 | Vmn2r-ps56 | 0.0000 | No |
| 48463 | Vmn2r-ps57 | 0.0000 | No |
| 48464 | Vmn2r-ps58 | 0.0000 | No |
| 48465 | Vmn2r-ps59 | 0.0000 | No |
| 48466 | Vmn2r-ps6  | 0.0000 | No |
| 48467 | Vmn2r-ps60 | 0.0000 | No |
| 48468 | Vmn2r-ps61 | 0.0000 | No |
| 48469 | Vmn2r-ps62 | 0.0000 | No |
| 48470 | Vmn2r-ps64 | 0.0000 | No |
| 48471 | Vmn2r-ps66 | 0.0000 | No |
| 48472 | Vmn2r-ps67 | 0.0000 | No |
| 48473 | Vmn2r-ps68 | 0.0000 | No |
| 48474 | Vmn2r-ps69 | 0.0000 | No |
| 48475 | Vmn2r-ps7  | 0.0000 | No |
| 48476 | Vmn2r-ps70 | 0.0000 | No |
| 48477 | Vmn2r-ps72 | 0.0000 | No |
| 48478 | Vmn2r-ps73 | 0.0000 | No |
| 48479 | Vmn2r-ps74 | 0.0000 | No |
| 48480 | Vmn2r-ps75 | 0.0000 | No |
| 48481 | Vmn2r-ps76 | 0.0000 | No |

|       |            |        |    |
|-------|------------|--------|----|
| 48482 | Vmn2r-ps78 | 0.0000 | No |
| 48483 | Vmn2r-ps79 | 0.0000 | No |
| 48484 | Vmn2r-ps8  | 0.0000 | No |
| 48485 | Vmn2r-ps80 | 0.0000 | No |
| 48486 | Vmn2r-ps81 | 0.0000 | No |
| 48487 | Vmn2r-ps82 | 0.0000 | No |
| 48488 | Vmn2r-ps83 | 0.0000 | No |
| 48489 | Vmn2r-ps85 | 0.0000 | No |
| 48490 | Vmn2r-ps87 | 0.0000 | No |
| 48491 | Vmn2r-ps88 | 0.0000 | No |
| 48492 | Vmn2r-ps89 | 0.0000 | No |
| 48493 | Vmn2r-ps9  | 0.0000 | No |
| 48494 | Vmo1       | 0.0000 | No |
| 48495 | Vmp1       | 0.0000 | No |
| 48496 | Vnn1       | 0.0000 | No |
| 48497 | Vnn3       | 0.0000 | No |
| 48498 | Vopp1      | 0.0000 | No |
| 48499 | Vprbp      | 0.0000 | No |
| 48500 | Vpreb1     | 0.0000 | No |
| 48501 | Vpreb2     | 0.0000 | No |
| 48502 | Vps11      | 0.0000 | No |
| 48503 | Vps13a     | 0.0000 | No |
| 48504 | Vps13b     | 0.0000 | No |
| 48505 | Vps13c     | 0.0000 | No |
| 48506 | Vps13d     | 0.0000 | No |
| 48507 | Vps16      | 0.0000 | No |
| 48508 | Vps18      | 0.0000 | No |
| 48509 | Vps25      | 0.0000 | No |
| 48510 | Vps26a     | 0.0000 | No |
| 48511 | Vps29      | 0.0000 | No |
| 48512 | Vps33a     | 0.0000 | No |
| 48513 | Vps33b     | 0.0000 | No |
| 48514 | Vps35      | 0.0000 | No |
| 48515 | Vps36      | 0.0000 | No |
| 48516 | Vps37a     | 0.0000 | No |
| 48517 | Vps37b     | 0.0000 | No |
| 48518 | Vps37c     | 0.0000 | No |
| 48519 | Vps37d     | 0.0000 | No |
| 48520 | Vps39      | 0.0000 | No |
| 48521 | Vps41      | 0.0000 | No |
| 48522 | Vps45      | 0.0000 | No |
| 48523 | Vps4a      | 0.0000 | No |
| 48524 | Vps4b      | 0.0000 | No |
| 48525 | Vps50      | 0.0000 | No |
| 48526 | Vps51      | 0.0000 | No |
| 48527 | Vps52      | 0.0000 | No |

|       |         |        |    |
|-------|---------|--------|----|
| 48528 | Vps53   | 0.0000 | No |
| 48529 | Vps54   | 0.0000 | No |
| 48530 | Vps72   | 0.0000 | No |
| 48531 | Vps8    | 0.0000 | No |
| 48532 | Vps9d1  | 0.0000 | No |
| 48533 | Vrk2    | 0.0000 | No |
| 48534 | Vrk3    | 0.0000 | No |
| 48535 | Vsig1   | 0.0000 | No |
| 48536 | Vsig10l | 0.0000 | No |
| 48537 | Vsig2   | 0.0000 | No |
| 48538 | Vsir    | 0.0000 | No |
| 48539 | Vsnl1   | 0.0000 | No |
| 48540 | Vstm2a  | 0.0000 | No |
| 48541 | Vstm2b  | 0.0000 | No |
| 48542 | Vstm2l  | 0.0000 | No |
| 48543 | Vstm4   | 0.0000 | No |
| 48544 | Vstm5   | 0.0000 | No |
| 48545 | Vsx1    | 0.0000 | No |
| 48546 | Vsx2    | 0.0000 | No |
| 48547 | Vta1    | 0.0000 | No |
| 48548 | Vtcn1   | 0.0000 | No |
| 48549 | Vti1a   | 0.0000 | No |
| 48550 | Vti1b   | 0.0000 | No |
| 48551 | Vwa1    | 0.0000 | No |
| 48552 | Vwa2    | 0.0000 | No |
| 48553 | Vwa3a   | 0.0000 | No |
| 48554 | Vwa3b   | 0.0000 | No |
| 48555 | Vwa5a   | 0.0000 | No |
| 48556 | Vwa5b1  | 0.0000 | No |
| 48557 | Vwa5b2  | 0.0000 | No |
| 48558 | Vwa8    | 0.0000 | No |
| 48559 | Vwa9    | 0.0000 | No |
| 48560 | Vwc2    | 0.0000 | No |
| 48561 | Vwc2l   | 0.0000 | No |
| 48562 | Vwce    | 0.0000 | No |
| 48563 | Vwde    | 0.0000 | No |
| 48564 | Vwf     | 0.0000 | No |
| 48565 | Wac     | 0.0000 | No |
| 48566 | Wap     | 0.0000 | No |
| 48567 | Wapl    | 0.0000 | No |
| 48568 | Wars    | 0.0000 | No |
| 48569 | Wars2   | 0.0000 | No |
| 48570 | Was     | 0.0000 | No |
| 48571 | Wasf1   | 0.0000 | No |
| 48572 | Wasf2   | 0.0000 | No |
| 48573 | Wasf3   | 0.0000 | No |



|       |          |        |    |
|-------|----------|--------|----|
| 48574 | Wash1    | 0.0000 | No |
| 48575 | Was1     | 0.0000 | No |
| 48576 | Wbp11    | 0.0000 | No |
| 48577 | Wbp2     | 0.0000 | No |
| 48578 | Wbp2nl   | 0.0000 | No |
| 48579 | Wbp4     | 0.0000 | No |
| 48580 | Wbp5     | 0.0000 | No |
| 48581 | Wbscr16  | 0.0000 | No |
| 48582 | Wbscr22  | 0.0000 | No |
| 48583 | Wbscr25  | 0.0000 | No |
| 48584 | Wbscr27  | 0.0000 | No |
| 48585 | Wbscr28  | 0.0000 | No |
| 48586 | Wdfy1    | 0.0000 | No |
| 48587 | Wdfy2    | 0.0000 | No |
| 48588 | Wdfy3    | 0.0000 | No |
| 48589 | Wdhd1    | 0.0000 | No |
| 48590 | Wdpcp    | 0.0000 | No |
| 48591 | Wdr1     | 0.0000 | No |
| 48592 | Wdr11    | 0.0000 | No |
| 48593 | Wdr12    | 0.0000 | No |
| 48594 | Wdr13    | 0.0000 | No |
| 48595 | Wdr17    | 0.0000 | No |
| 48596 | Wdr18    | 0.0000 | No |
| 48597 | Wdr19    | 0.0000 | No |
| 48598 | Wdr20    | 0.0000 | No |
| 48599 | Wdr24    | 0.0000 | No |
| 48600 | Wdr25    | 0.0000 | No |
| 48601 | Wdr26    | 0.0000 | No |
| 48602 | Wdr27    | 0.0000 | No |
| 48603 | Wdr3     | 0.0000 | No |
| 48604 | Wdr31    | 0.0000 | No |
| 48605 | Wdr33    | 0.0000 | No |
| 48606 | Wdr34    | 0.0000 | No |
| 48607 | Wdr35    | 0.0000 | No |
| 48608 | Wdr36    | 0.0000 | No |
| 48609 | Wdr37    | 0.0000 | No |
| 48610 | Wdr38    | 0.0000 | No |
| 48611 | Wdr4     | 0.0000 | No |
| 48612 | Wdr41    | 0.0000 | No |
| 48613 | Wdr43    | 0.0000 | No |
| 48614 | Wdr44    | 0.0000 | No |
| 48615 | Wdr45    | 0.0000 | No |
| 48616 | Wdr45b   | 0.0000 | No |
| 48617 | Wdr46    | 0.0000 | No |
| 48618 | Wdr46-ps | 0.0000 | No |
| 48619 | Wdr47    | 0.0000 | No |

|       |         |        |    |
|-------|---------|--------|----|
| 48620 | Wdr48   | 0.0000 | No |
| 48621 | Wdr49   | 0.0000 | No |
| 48622 | Wdr5    | 0.0000 | No |
| 48623 | Wdr53   | 0.0000 | No |
| 48624 | Wdr54   | 0.0000 | No |
| 48625 | Wdr55   | 0.0000 | No |
| 48626 | Wdr59   | 0.0000 | No |
| 48627 | Wdr5b   | 0.0000 | No |
| 48628 | Wdr6    | 0.0000 | No |
| 48629 | Wdr60   | 0.0000 | No |
| 48630 | Wdr61   | 0.0000 | No |
| 48631 | Wdr62   | 0.0000 | No |
| 48632 | Wdr63   | 0.0000 | No |
| 48633 | Wdr64   | 0.0000 | No |
| 48634 | Wdr66   | 0.0000 | No |
| 48635 | Wdr7    | 0.0000 | No |
| 48636 | Wdr70   | 0.0000 | No |
| 48637 | Wdr72   | 0.0000 | No |
| 48638 | Wdr73   | 0.0000 | No |
| 48639 | Wdr74   | 0.0000 | No |
| 48640 | Wdr75   | 0.0000 | No |
| 48641 | Wdr76   | 0.0000 | No |
| 48642 | Wdr77   | 0.0000 | No |
| 48643 | Wdr78   | 0.0000 | No |
| 48644 | Wdr81   | 0.0000 | No |
| 48645 | Wdr82   | 0.0000 | No |
| 48646 | Wdr83   | 0.0000 | No |
| 48647 | Wdr83os | 0.0000 | No |
| 48648 | Wdr86   | 0.0000 | No |
| 48649 | Wdr89   | 0.0000 | No |
| 48650 | Wdr90   | 0.0000 | No |
| 48651 | Wdr91   | 0.0000 | No |
| 48652 | Wdr92   | 0.0000 | No |
| 48653 | Wdr93   | 0.0000 | No |
| 48654 | Wdr95   | 0.0000 | No |
| 48655 | Wdsub1  | 0.0000 | No |
| 48656 | Wdte1   | 0.0000 | No |
| 48657 | Wdyhv1  | 0.0000 | No |
| 48658 | Wee1    | 0.0000 | No |
| 48659 | Wee2    | 0.0000 | No |
| 48660 | Wfdc1   | 0.0000 | No |
| 48661 | Wfdc10  | 0.0000 | No |
| 48662 | Wfdc11  | 0.0000 | No |
| 48663 | Wfdc12  | 0.0000 | No |
| 48664 | Wfdc13  | 0.0000 | No |
| 48665 | Wfdc15b | 0.0000 | No |

|       |               |        |    |
|-------|---------------|--------|----|
| 48666 | Wfdc16        | 0.0000 | No |
| 48667 | Wfdc17        | 0.0000 | No |
| 48668 | Wfdc18        | 0.0000 | No |
| 48669 | Wfdc3         | 0.0000 | No |
| 48670 | Wfdc5         | 0.0000 | No |
| 48671 | Wfdc6a        | 0.0000 | No |
| 48672 | Wfdc6b        | 0.0000 | No |
| 48673 | Wfdc8         | 0.0000 | No |
| 48674 | Wfdc9         | 0.0000 | No |
| 48675 | Wfikkn1       | 0.0000 | No |
| 48676 | Wfs1          | 0.0000 | No |
| 48677 | Whamm         | 0.0000 | No |
| 48678 | Whrn          | 0.0000 | No |
| 48679 | Whsc1         | 0.0000 | No |
| 48680 | Whsc111       | 0.0000 | No |
| 48681 | WI1-1003N17.1 | 0.0000 | No |
| 48682 | WI1-1003N17.2 | 0.0000 | No |
| 48683 | WI1-1203N12.2 | 0.0000 | No |
| 48684 | WI1-2477B13.3 | 0.0000 | No |
| 48685 | WI1-2736D10.2 | 0.0000 | No |
| 48686 | WI1-2736D10.3 | 0.0000 | No |
| 48687 | Wipf1         | 0.0000 | No |
| 48688 | Wipf2         | 0.0000 | No |
| 48689 | Wipf3         | 0.0000 | No |
| 48690 | Wipi1         | 0.0000 | No |
| 48691 | Wipi2         | 0.0000 | No |
| 48692 | Wisp1         | 0.0000 | No |
| 48693 | Wisp2         | 0.0000 | No |
| 48694 | Wisp3         | 0.0000 | No |
| 48695 | Wiz           | 0.0000 | No |
| 48696 | Wnk1          | 0.0000 | No |
| 48697 | Wnk2          | 0.0000 | No |
| 48698 | Wnk3          | 0.0000 | No |
| 48699 | Wnk4          | 0.0000 | No |
| 48700 | Wnt1          | 0.0000 | No |
| 48701 | Wnt10a        | 0.0000 | No |
| 48702 | Wnt10b        | 0.0000 | No |
| 48703 | Wnt11         | 0.0000 | No |
| 48704 | Wnt2          | 0.0000 | No |
| 48705 | Wnt2b         | 0.0000 | No |
| 48706 | Wnt3          | 0.0000 | No |
| 48707 | Wnt3a         | 0.0000 | No |
| 48708 | Wnt4          | 0.0000 | No |
| 48709 | Wnt5a         | 0.0000 | No |
| 48710 | Wnt5b         | 0.0000 | No |
| 48711 | Wnt6          | 0.0000 | No |

|       |          |        |    |
|-------|----------|--------|----|
| 48712 | Wnt7a    | 0.0000 | No |
| 48713 | Wnt7b    | 0.0000 | No |
| 48714 | Wnt8a    | 0.0000 | No |
| 48715 | Wnt8b    | 0.0000 | No |
| 48716 | Wnt9a    | 0.0000 | No |
| 48717 | Wnt9b    | 0.0000 | No |
| 48718 | Wrap53   | 0.0000 | No |
| 48719 | Wrap73   | 0.0000 | No |
| 48720 | Wrb      | 0.0000 | No |
| 48721 | Wrn      | 0.0000 | No |
| 48722 | Wrnip1   | 0.0000 | No |
| 48723 | Wsb1     | 0.0000 | No |
| 48724 | Wsb2     | 0.0000 | No |
| 48725 | Wsb2-ps  | 0.0000 | No |
| 48726 | Wscd1    | 0.0000 | No |
| 48727 | Wscd2    | 0.0000 | No |
| 48728 | Wt1      | 0.0000 | No |
| 48729 | Wt1os    | 0.0000 | No |
| 48730 | Wtap     | 0.0000 | No |
| 48731 | Wwc1     | 0.0000 | No |
| 48732 | Wwc2     | 0.0000 | No |
| 48733 | Wwox     | 0.0000 | No |
| 48734 | Wwp1     | 0.0000 | No |
| 48735 | Wwtr1    | 0.0000 | No |
| 48736 | Xab2     | 0.0000 | No |
| 48737 | Xaf1     | 0.0000 | No |
| 48738 | Xbp1     | 0.0000 | No |
| 48739 | Xcr1     | 0.0000 | No |
| 48740 | Xdh      | 0.0000 | No |
| 48741 | Xiap     | 0.0000 | No |
| 48742 | Xirp1    | 0.0000 | No |
| 48743 | Xirp2    | 0.0000 | No |
| 48744 | Xist     | 0.0000 | No |
| 48745 | Xk       | 0.0000 | No |
| 48746 | Xkr4     | 0.0000 | No |
| 48747 | Xkr5     | 0.0000 | No |
| 48748 | Xkr6     | 0.0000 | No |
| 48749 | Xkr8     | 0.0000 | No |
| 48750 | Xkr9     | 0.0000 | No |
| 48751 | Xkrx     | 0.0000 | No |
| 48752 | Xlr      | 0.0000 | No |
| 48753 | Xlr3a    | 0.0000 | No |
| 48754 | Xlr3b    | 0.0000 | No |
| 48755 | Xlr3c    | 0.0000 | No |
| 48756 | Xlr3d-ps | 0.0000 | No |
| 48757 | Xlr4b    | 0.0000 | No |

|       |          |        |    |
|-------|----------|--------|----|
| 48758 | Xlr4c    | 0.0000 | No |
| 48759 | Xlr4d-ps | 0.0000 | No |
| 48760 | Xlr4e-ps | 0.0000 | No |
| 48761 | Xlr5a    | 0.0000 | No |
| 48762 | Xlr5b    | 0.0000 | No |
| 48763 | Xlr5c    | 0.0000 | No |
| 48764 | Xlr5d-ps | 0.0000 | No |
| 48765 | Xlr5e-ps | 0.0000 | No |
| 48766 | Xndc1    | 0.0000 | No |
| 48767 | Xntrpc   | 0.0000 | No |
| 48768 | Xpa      | 0.0000 | No |
| 48769 | Xpc      | 0.0000 | No |
| 48770 | Xpnpep1  | 0.0000 | No |
| 48771 | Xpnpep2  | 0.0000 | No |
| 48772 | Xpnpep3  | 0.0000 | No |
| 48773 | Xpo1     | 0.0000 | No |
| 48774 | Xpo4     | 0.0000 | No |
| 48775 | Xpo5     | 0.0000 | No |
| 48776 | Xpo6     | 0.0000 | No |
| 48777 | Xpo7     | 0.0000 | No |
| 48778 | Xpot     | 0.0000 | No |
| 48779 | Xpr1     | 0.0000 | No |
| 48780 | Xrcc1    | 0.0000 | No |
| 48781 | Xrcc2    | 0.0000 | No |
| 48782 | Xrcc3    | 0.0000 | No |
| 48783 | Xrcc4    | 0.0000 | No |
| 48784 | Xrcc5    | 0.0000 | No |
| 48785 | Xrcc6    | 0.0000 | No |
| 48786 | Xrcc6bp1 | 0.0000 | No |
| 48787 | Xrn1     | 0.0000 | No |
| 48788 | Xrn2     | 0.0000 | No |
| 48789 | Xrra1    | 0.0000 | No |
| 48790 | Xxylt1   | 0.0000 | No |
| 48791 | Xylb     | 0.0000 | No |
| 48792 | Xylt1    | 0.0000 | No |
| 48793 | Xylt2    | 0.0000 | No |
| 48794 | Yae1d1   | 0.0000 | No |
| 48795 | Yaf2     | 0.0000 | No |
| 48796 | Yap1     | 0.0000 | No |
| 48797 | Yars     | 0.0000 | No |
| 48798 | Yars2    | 0.0000 | No |
| 48799 | Ybey     | 0.0000 | No |
| 48800 | Ybx1     | 0.0000 | No |
| 48801 | Ybx1-ps2 | 0.0000 | No |
| 48802 | Ybx2     | 0.0000 | No |
| 48803 | Ybx3     | 0.0000 | No |

|       |           |        |    |
|-------|-----------|--------|----|
| 48804 | Ydjc      | 0.0000 | No |
| 48805 | Yeats2    | 0.0000 | No |
| 48806 | Yes1      | 0.0000 | No |
| 48807 | Yif1b     | 0.0000 | No |
| 48808 | Yipf1     | 0.0000 | No |
| 48809 | Yipf2     | 0.0000 | No |
| 48810 | Yipf3     | 0.0000 | No |
| 48811 | Yipf4     | 0.0000 | No |
| 48812 | Yipf5     | 0.0000 | No |
| 48813 | Yipf6     | 0.0000 | No |
| 48814 | Yipf7     | 0.0000 | No |
| 48815 | Yjefn3    | 0.0000 | No |
| 48816 | Ykt6      | 0.0000 | No |
| 48817 | Ylpm1     | 0.0000 | No |
| 48818 | Yme111    | 0.0000 | No |
| 48819 | Yod1      | 0.0000 | No |
| 48820 | Ypel1     | 0.0000 | No |
| 48821 | Ypel2     | 0.0000 | No |
| 48822 | Ypel3     | 0.0000 | No |
| 48823 | Ypel4     | 0.0000 | No |
| 48824 | Ypel5     | 0.0000 | No |
| 48825 | Yrdc      | 0.0000 | No |
| 48826 | Ythdc1    | 0.0000 | No |
| 48827 | Ythdc2    | 0.0000 | No |
| 48828 | Ythdf1    | 0.0000 | No |
| 48829 | Ythdf2    | 0.0000 | No |
| 48830 | Ythdf3    | 0.0000 | No |
| 48831 | Ywhab     | 0.0000 | No |
| 48832 | Ywhae     | 0.0000 | No |
| 48833 | Ywhag     | 0.0000 | No |
| 48834 | Ywhah     | 0.0000 | No |
| 48835 | Ywhaq     | 0.0000 | No |
| 48836 | Ywhaq-ps1 | 0.0000 | No |
| 48837 | Ywhaq-ps2 | 0.0000 | No |
| 48838 | Ywhaz     | 0.0000 | No |
| 48839 | Yy1       | 0.0000 | No |
| 48840 | Yy2       | 0.0000 | No |
| 48841 | Zadh2     | 0.0000 | No |
| 48842 | Zak       | 0.0000 | No |
| 48843 | Zan       | 0.0000 | No |
| 48844 | Zar1      | 0.0000 | No |
| 48845 | Zar11     | 0.0000 | No |
| 48846 | Zbbx      | 0.0000 | No |
| 48847 | Zbed3     | 0.0000 | No |
| 48848 | Zbed4     | 0.0000 | No |
| 48849 | Zbed4-ps1 | 0.0000 | No |

|       |           |        |    |
|-------|-----------|--------|----|
| 48850 | Zbed5     | 0.0000 | No |
| 48851 | Zbed6     | 0.0000 | No |
| 48852 | Zbp1      | 0.0000 | No |
| 48853 | Zbtb1     | 0.0000 | No |
| 48854 | Zbtb10    | 0.0000 | No |
| 48855 | Zbtb11    | 0.0000 | No |
| 48856 | Zbtb11os1 | 0.0000 | No |
| 48857 | Zbtb12    | 0.0000 | No |
| 48858 | Zbtb14    | 0.0000 | No |
| 48859 | Zbtb17    | 0.0000 | No |
| 48860 | Zbtb18    | 0.0000 | No |
| 48861 | Zbtb2     | 0.0000 | No |
| 48862 | Zbtb21    | 0.0000 | No |
| 48863 | Zbtb22    | 0.0000 | No |
| 48864 | Zbtb24    | 0.0000 | No |
| 48865 | Zbtb25    | 0.0000 | No |
| 48866 | Zbtb26    | 0.0000 | No |
| 48867 | Zbtb3     | 0.0000 | No |
| 48868 | Zbtb32    | 0.0000 | No |
| 48869 | Zbtb33    | 0.0000 | No |
| 48870 | Zbtb34    | 0.0000 | No |
| 48871 | Zbtb37    | 0.0000 | No |
| 48872 | Zbtb38    | 0.0000 | No |
| 48873 | Zbtb39    | 0.0000 | No |
| 48874 | Zbtb4     | 0.0000 | No |
| 48875 | Zbtb40    | 0.0000 | No |
| 48876 | Zbtb41    | 0.0000 | No |
| 48877 | Zbtb42    | 0.0000 | No |
| 48878 | Zbtb43    | 0.0000 | No |
| 48879 | Zbtb44    | 0.0000 | No |
| 48880 | Zbtb45    | 0.0000 | No |
| 48881 | Zbtb46    | 0.0000 | No |
| 48882 | Zbtb48    | 0.0000 | No |
| 48883 | Zbtb49    | 0.0000 | No |
| 48884 | Zbtb5     | 0.0000 | No |
| 48885 | Zbtb6     | 0.0000 | No |
| 48886 | Zbtb7a    | 0.0000 | No |
| 48887 | Zbtb7b    | 0.0000 | No |
| 48888 | Zbtb7c    | 0.0000 | No |
| 48889 | Zbtb8a    | 0.0000 | No |
| 48890 | Zbtb8os   | 0.0000 | No |
| 48891 | Zc2hc1a   | 0.0000 | No |
| 48892 | Zc2hc1b   | 0.0000 | No |
| 48893 | Zc3h10    | 0.0000 | No |
| 48894 | Zc3h11a   | 0.0000 | No |
| 48895 | Zc3h12a   | 0.0000 | No |

|       |           |        |    |
|-------|-----------|--------|----|
| 48896 | Zc3h12b   | 0.0000 | No |
| 48897 | Zc3h12c   | 0.0000 | No |
| 48898 | Zc3h12d   | 0.0000 | No |
| 48899 | Zc3h13    | 0.0000 | No |
| 48900 | Zc3h14    | 0.0000 | No |
| 48901 | Zc3h15    | 0.0000 | No |
| 48902 | Zc3h18    | 0.0000 | No |
| 48903 | Zc3h3     | 0.0000 | No |
| 48904 | Zc3h4     | 0.0000 | No |
| 48905 | Zc3h6     | 0.0000 | No |
| 48906 | Zc3h7a    | 0.0000 | No |
| 48907 | Zc3h7b    | 0.0000 | No |
| 48908 | Zc3h8     | 0.0000 | No |
| 48909 | Zc3hav1   | 0.0000 | No |
| 48910 | Zc3hav11  | 0.0000 | No |
| 48911 | Zc3hc1    | 0.0000 | No |
| 48912 | Zc4h2     | 0.0000 | No |
| 48913 | Zcchc10   | 0.0000 | No |
| 48914 | Zcchc11   | 0.0000 | No |
| 48915 | Zcchc12   | 0.0000 | No |
| 48916 | Zcchc13   | 0.0000 | No |
| 48917 | Zcchc14   | 0.0000 | No |
| 48918 | Zcchc16   | 0.0000 | No |
| 48919 | Zcchc17   | 0.0000 | No |
| 48920 | Zcchc18   | 0.0000 | No |
| 48921 | Zcchc2    | 0.0000 | No |
| 48922 | Zcchc24   | 0.0000 | No |
| 48923 | Zcchc3    | 0.0000 | No |
| 48924 | Zcchc4    | 0.0000 | No |
| 48925 | Zcchc5    | 0.0000 | No |
| 48926 | Zcchc6    | 0.0000 | No |
| 48927 | Zcchc7    | 0.0000 | No |
| 48928 | Zcchc8    | 0.0000 | No |
| 48929 | Zcchc9    | 0.0000 | No |
| 48930 | Zcchc9-ps | 0.0000 | No |
| 48931 | Zcrb1     | 0.0000 | No |
| 48932 | Zcwpw1    | 0.0000 | No |
| 48933 | Zdbf2     | 0.0000 | No |
| 48934 | Zdhhc1    | 0.0000 | No |
| 48935 | Zdhhc11   | 0.0000 | No |
| 48936 | Zdhhc13   | 0.0000 | No |
| 48937 | Zdhhc14   | 0.0000 | No |
| 48938 | Zdhhc16   | 0.0000 | No |
| 48939 | Zdhhc17   | 0.0000 | No |
| 48940 | Zdhhc18   | 0.0000 | No |
| 48941 | Zdhhc19   | 0.0000 | No |



|       |         |        |    |
|-------|---------|--------|----|
| 48942 | Zdhhc2  | 0.0000 | No |
| 48943 | Zdhhc20 | 0.0000 | No |
| 48944 | Zdhhc21 | 0.0000 | No |
| 48945 | Zdhhc22 | 0.0000 | No |
| 48946 | Zdhhc23 | 0.0000 | No |
| 48947 | Zdhhc24 | 0.0000 | No |
| 48948 | Zdhhc25 | 0.0000 | No |
| 48949 | Zdhhc3  | 0.0000 | No |
| 48950 | Zdhhc4  | 0.0000 | No |
| 48951 | Zdhhc5  | 0.0000 | No |
| 48952 | Zdhhc6  | 0.0000 | No |
| 48953 | Zdhhc7  | 0.0000 | No |
| 48954 | Zdhhc8  | 0.0000 | No |
| 48955 | Zdhhc9  | 0.0000 | No |
| 48956 | Zeb1    | 0.0000 | No |
| 48957 | Zeb2    | 0.0000 | No |
| 48958 | Zeb2os  | 0.0000 | No |
| 48959 | Zer1    | 0.0000 | No |
| 48960 | Zfand1  | 0.0000 | No |
| 48961 | Zfand2a | 0.0000 | No |
| 48962 | Zfand2b | 0.0000 | No |
| 48963 | Zfand3  | 0.0000 | No |
| 48964 | Zfand4  | 0.0000 | No |
| 48965 | Zfand5  | 0.0000 | No |
| 48966 | Zfand6  | 0.0000 | No |
| 48967 | Zfa-ps  | 0.0000 | No |
| 48968 | Zfas1   | 0.0000 | No |
| 48969 | Zfat    | 0.0000 | No |
| 48970 | Zfc3h1  | 0.0000 | No |
| 48971 | Zfhx2   | 0.0000 | No |
| 48972 | Zfhx2os | 0.0000 | No |
| 48973 | Zfhx3   | 0.0000 | No |
| 48974 | Zfhx4   | 0.0000 | No |
| 48975 | Zfp1    | 0.0000 | No |
| 48976 | Zfp101  | 0.0000 | No |
| 48977 | Zfp106  | 0.0000 | No |
| 48978 | Zfp108  | 0.0000 | No |
| 48979 | Zfp109  | 0.0000 | No |
| 48980 | Zfp11   | 0.0000 | No |
| 48981 | Zfp110  | 0.0000 | No |
| 48982 | Zfp111  | 0.0000 | No |
| 48983 | Zfp112  | 0.0000 | No |
| 48984 | Zfp113  | 0.0000 | No |
| 48985 | Zfp114  | 0.0000 | No |
| 48986 | Zfp119a | 0.0000 | No |
| 48987 | Zfp119b | 0.0000 | No |

|       |            |        |    |
|-------|------------|--------|----|
| 48988 | Zfp12      | 0.0000 | No |
| 48989 | Zfp120     | 0.0000 | No |
| 48990 | Zfp128     | 0.0000 | No |
| 48991 | Zfp13      | 0.0000 | No |
| 48992 | Zfp133-ps  | 0.0000 | No |
| 48993 | Zfp14      | 0.0000 | No |
| 48994 | Zfp141     | 0.0000 | No |
| 48995 | Zfp142     | 0.0000 | No |
| 48996 | Zfp143     | 0.0000 | No |
| 48997 | Zfp146     | 0.0000 | No |
| 48998 | Zfp148     | 0.0000 | No |
| 48999 | Zfp148-ps1 | 0.0000 | No |
| 49000 | Zfp157     | 0.0000 | No |
| 49001 | Zfp160     | 0.0000 | No |
| 49002 | Zfp169     | 0.0000 | No |
| 49003 | Zfp174     | 0.0000 | No |
| 49004 | Zfp180     | 0.0000 | No |
| 49005 | Zfp182     | 0.0000 | No |
| 49006 | Zfp184     | 0.0000 | No |
| 49007 | Zfp185     | 0.0000 | No |
| 49008 | Zfp189     | 0.0000 | No |
| 49009 | Zfp2       | 0.0000 | No |
| 49010 | Zfp202     | 0.0000 | No |
| 49011 | Zfp207     | 0.0000 | No |
| 49012 | Zfp212     | 0.0000 | No |
| 49013 | Zfp213     | 0.0000 | No |
| 49014 | Zfp219     | 0.0000 | No |
| 49015 | Zfp229     | 0.0000 | No |
| 49016 | Zfp235     | 0.0000 | No |
| 49017 | Zfp236     | 0.0000 | No |
| 49018 | Zfp239     | 0.0000 | No |
| 49019 | Zfp24      | 0.0000 | No |
| 49020 | Zfp248     | 0.0000 | No |
| 49021 | Zfp251     | 0.0000 | No |
| 49022 | Zfp260     | 0.0000 | No |
| 49023 | Zfp263     | 0.0000 | No |
| 49024 | Zfp264     | 0.0000 | No |
| 49025 | Zfp266     | 0.0000 | No |
| 49026 | Zfp27      | 0.0000 | No |
| 49027 | Zfp273     | 0.0000 | No |
| 49028 | Zfp275     | 0.0000 | No |
| 49029 | Zfp276     | 0.0000 | No |
| 49030 | Zfp277     | 0.0000 | No |
| 49031 | Zfp28      | 0.0000 | No |
| 49032 | Zfp280b    | 0.0000 | No |
| 49033 | Zfp280c    | 0.0000 | No |

|       |            |        |    |
|-------|------------|--------|----|
| 49034 | Zfp280d    | 0.0000 | No |
| 49035 | Zfp281     | 0.0000 | No |
| 49036 | Zfp282     | 0.0000 | No |
| 49037 | Zfp286     | 0.0000 | No |
| 49038 | Zfp286os   | 0.0000 | No |
| 49039 | Zfp287     | 0.0000 | No |
| 49040 | Zfp292     | 0.0000 | No |
| 49041 | Zfp3       | 0.0000 | No |
| 49042 | Zfp30      | 0.0000 | No |
| 49043 | Zfp300     | 0.0000 | No |
| 49044 | Zfp316     | 0.0000 | No |
| 49045 | Zfp317     | 0.0000 | No |
| 49046 | Zfp318     | 0.0000 | No |
| 49047 | Zfp319     | 0.0000 | No |
| 49048 | Zfp322a    | 0.0000 | No |
| 49049 | Zfp324     | 0.0000 | No |
| 49050 | Zfp329     | 0.0000 | No |
| 49051 | Zfp330     | 0.0000 | No |
| 49052 | Zfp334     | 0.0000 | No |
| 49053 | Zfp335os   | 0.0000 | No |
| 49054 | Zfp341     | 0.0000 | No |
| 49055 | Zfp345     | 0.0000 | No |
| 49056 | Zfp346     | 0.0000 | No |
| 49057 | Zfp35      | 0.0000 | No |
| 49058 | Zfp353-ps  | 0.0000 | No |
| 49059 | Zfp354a    | 0.0000 | No |
| 49060 | Zfp354b    | 0.0000 | No |
| 49061 | Zfp358     | 0.0000 | No |
| 49062 | Zfp36      | 0.0000 | No |
| 49063 | Zfp362     | 0.0000 | No |
| 49064 | Zfp365     | 0.0000 | No |
| 49065 | Zfp366     | 0.0000 | No |
| 49066 | Zfp367     | 0.0000 | No |
| 49067 | Zfp369     | 0.0000 | No |
| 49068 | Zfp3611    | 0.0000 | No |
| 49069 | Zfp3611-ps | 0.0000 | No |
| 49070 | Zfp3612    | 0.0000 | No |
| 49071 | Zfp3613    | 0.0000 | No |
| 49072 | Zfp37      | 0.0000 | No |
| 49073 | Zfp382     | 0.0000 | No |
| 49074 | Zfp383     | 0.0000 | No |
| 49075 | Zfp384     | 0.0000 | No |
| 49076 | Zfp385a    | 0.0000 | No |
| 49077 | Zfp385b    | 0.0000 | No |
| 49078 | Zfp385c    | 0.0000 | No |
| 49079 | Zfp386     | 0.0000 | No |

|       |           |        |    |
|-------|-----------|--------|----|
| 49080 | Zfp389    | 0.0000 | No |
| 49081 | Zfp39     | 0.0000 | No |
| 49082 | Zfp395    | 0.0000 | No |
| 49083 | Zfp397    | 0.0000 | No |
| 49084 | Zfp40     | 0.0000 | No |
| 49085 | Zfp407    | 0.0000 | No |
| 49086 | Zfp408    | 0.0000 | No |
| 49087 | Zfp41     | 0.0000 | No |
| 49088 | Zfp410    | 0.0000 | No |
| 49089 | Zfp414    | 0.0000 | No |
| 49090 | Zfp418    | 0.0000 | No |
| 49091 | Zfp419    | 0.0000 | No |
| 49092 | Zfp42     | 0.0000 | No |
| 49093 | Zfp420    | 0.0000 | No |
| 49094 | Zfp422    | 0.0000 | No |
| 49095 | Zfp422-ps | 0.0000 | No |
| 49096 | Zfp423    | 0.0000 | No |
| 49097 | Zfp426    | 0.0000 | No |
| 49098 | Zfp428    | 0.0000 | No |
| 49099 | Zfp429    | 0.0000 | No |
| 49100 | Zfp433    | 0.0000 | No |
| 49101 | Zfp438    | 0.0000 | No |
| 49102 | Zfp442    | 0.0000 | No |
| 49103 | Zfp444    | 0.0000 | No |
| 49104 | Zfp445    | 0.0000 | No |
| 49105 | Zfp446    | 0.0000 | No |
| 49106 | Zfp449    | 0.0000 | No |
| 49107 | Zfp451    | 0.0000 | No |
| 49108 | Zfp454    | 0.0000 | No |
| 49109 | Zfp455    | 0.0000 | No |
| 49110 | Zfp456    | 0.0000 | No |
| 49111 | Zfp457    | 0.0000 | No |
| 49112 | Zfp458    | 0.0000 | No |
| 49113 | Zfp459    | 0.0000 | No |
| 49114 | Zfp46     | 0.0000 | No |
| 49115 | Zfp467    | 0.0000 | No |
| 49116 | Zfp472    | 0.0000 | No |
| 49117 | Zfp473    | 0.0000 | No |
| 49118 | Zfp474    | 0.0000 | No |
| 49119 | Zfp488    | 0.0000 | No |
| 49120 | Zfp493    | 0.0000 | No |
| 49121 | Zfp503    | 0.0000 | No |
| 49122 | Zfp507    | 0.0000 | No |
| 49123 | Zfp51     | 0.0000 | No |
| 49124 | Zfp511    | 0.0000 | No |
| 49125 | Zfp512    | 0.0000 | No |

|       |         |        |    |
|-------|---------|--------|----|
| 49126 | Zfp512b | 0.0000 | No |
| 49127 | Zfp513  | 0.0000 | No |
| 49128 | Zfp518a | 0.0000 | No |
| 49129 | Zfp52   | 0.0000 | No |
| 49130 | Zfp521  | 0.0000 | No |
| 49131 | Zfp523  | 0.0000 | No |
| 49132 | Zfp524  | 0.0000 | No |
| 49133 | Zfp526  | 0.0000 | No |
| 49134 | Zfp53   | 0.0000 | No |
| 49135 | Zfp532  | 0.0000 | No |
| 49136 | Zfp534  | 0.0000 | No |
| 49137 | Zfp536  | 0.0000 | No |
| 49138 | Zfp54   | 0.0000 | No |
| 49139 | Zfp541  | 0.0000 | No |
| 49140 | Zfp551  | 0.0000 | No |
| 49141 | Zfp553  | 0.0000 | No |
| 49142 | Zfp558  | 0.0000 | No |
| 49143 | Zfp560  | 0.0000 | No |
| 49144 | Zfp563  | 0.0000 | No |
| 49145 | Zfp566  | 0.0000 | No |
| 49146 | Zfp568  | 0.0000 | No |
| 49147 | Zfp57   | 0.0000 | No |
| 49148 | Zfp572  | 0.0000 | No |
| 49149 | Zfp574  | 0.0000 | No |
| 49150 | Zfp575  | 0.0000 | No |
| 49151 | Zfp579  | 0.0000 | No |
| 49152 | Zfp58   | 0.0000 | No |
| 49153 | Zfp580  | 0.0000 | No |
| 49154 | Zfp583  | 0.0000 | No |
| 49155 | Zfp59   | 0.0000 | No |
| 49156 | Zfp592  | 0.0000 | No |
| 49157 | Zfp593  | 0.0000 | No |
| 49158 | Zfp595  | 0.0000 | No |
| 49159 | Zfp597  | 0.0000 | No |
| 49160 | Zfp598  | 0.0000 | No |
| 49161 | Zfp599  | 0.0000 | No |
| 49162 | Zfp60   | 0.0000 | No |
| 49163 | Zfp600  | 0.0000 | No |
| 49164 | Zfp605  | 0.0000 | No |
| 49165 | Zfp606  | 0.0000 | No |
| 49166 | Zfp607a | 0.0000 | No |
| 49167 | Zfp607b | 0.0000 | No |
| 49168 | Zfp608  | 0.0000 | No |
| 49169 | Zfp609  | 0.0000 | No |
| 49170 | Zfp61   | 0.0000 | No |
| 49171 | Zfp612  | 0.0000 | No |

|       |          |        |    |
|-------|----------|--------|----|
| 49172 | Zfp617   | 0.0000 | No |
| 49173 | Zfp618   | 0.0000 | No |
| 49174 | Zfp619   | 0.0000 | No |
| 49175 | Zfp62    | 0.0000 | No |
| 49176 | Zfp622   | 0.0000 | No |
| 49177 | Zfp623   | 0.0000 | No |
| 49178 | Zfp626   | 0.0000 | No |
| 49179 | Zfp628   | 0.0000 | No |
| 49180 | Zfp629   | 0.0000 | No |
| 49181 | Zfp637   | 0.0000 | No |
| 49182 | Zfp638   | 0.0000 | No |
| 49183 | Zfp639   | 0.0000 | No |
| 49184 | Zfp64    | 0.0000 | No |
| 49185 | Zfp640   | 0.0000 | No |
| 49186 | Zfp644   | 0.0000 | No |
| 49187 | Zfp646   | 0.0000 | No |
| 49188 | Zfp647   | 0.0000 | No |
| 49189 | Zfp648   | 0.0000 | No |
| 49190 | Zfp65    | 0.0000 | No |
| 49191 | Zfp651   | 0.0000 | No |
| 49192 | Zfp652os | 0.0000 | No |
| 49193 | Zfp653   | 0.0000 | No |
| 49194 | Zfp654   | 0.0000 | No |
| 49195 | Zfp655   | 0.0000 | No |
| 49196 | Zfp658   | 0.0000 | No |
| 49197 | Zfp661   | 0.0000 | No |
| 49198 | Zfp663   | 0.0000 | No |
| 49199 | Zfp664   | 0.0000 | No |
| 49200 | Zfp667   | 0.0000 | No |
| 49201 | Zfp668   | 0.0000 | No |
| 49202 | Zfp672   | 0.0000 | No |
| 49203 | Zfp677   | 0.0000 | No |
| 49204 | Zfp68    | 0.0000 | No |
| 49205 | Zfp683   | 0.0000 | No |
| 49206 | Zfp687   | 0.0000 | No |
| 49207 | Zfp688   | 0.0000 | No |
| 49208 | Zfp689   | 0.0000 | No |
| 49209 | Zfp69    | 0.0000 | No |
| 49210 | Zfp691   | 0.0000 | No |
| 49211 | Zfp692   | 0.0000 | No |
| 49212 | Zfp697   | 0.0000 | No |
| 49213 | Zfp7     | 0.0000 | No |
| 49214 | Zfp703   | 0.0000 | No |
| 49215 | Zfp704   | 0.0000 | No |
| 49216 | Zfp706   | 0.0000 | No |
| 49217 | Zfp707   | 0.0000 | No |

|       |           |        |    |
|-------|-----------|--------|----|
| 49218 | Zfp708    | 0.0000 | No |
| 49219 | Zfp709    | 0.0000 | No |
| 49220 | Zfp710    | 0.0000 | No |
| 49221 | Zfp712    | 0.0000 | No |
| 49222 | Zfp715    | 0.0000 | No |
| 49223 | Zfp719    | 0.0000 | No |
| 49224 | Zfp72     | 0.0000 | No |
| 49225 | Zfp729a   | 0.0000 | No |
| 49226 | Zfp729b   | 0.0000 | No |
| 49227 | Zfp735    | 0.0000 | No |
| 49228 | Zfp738    | 0.0000 | No |
| 49229 | Zfp74     | 0.0000 | No |
| 49230 | Zfp740    | 0.0000 | No |
| 49231 | Zfp746    | 0.0000 | No |
| 49232 | Zfp747    | 0.0000 | No |
| 49233 | Zfp748    | 0.0000 | No |
| 49234 | Zfp750    | 0.0000 | No |
| 49235 | Zfp758    | 0.0000 | No |
| 49236 | Zfp759    | 0.0000 | No |
| 49237 | Zfp760    | 0.0000 | No |
| 49238 | Zfp763    | 0.0000 | No |
| 49239 | Zfp764    | 0.0000 | No |
| 49240 | Zfp770    | 0.0000 | No |
| 49241 | Zfp771    | 0.0000 | No |
| 49242 | Zfp772    | 0.0000 | No |
| 49243 | Zfp773    | 0.0000 | No |
| 49244 | Zfp775    | 0.0000 | No |
| 49245 | Zfp777    | 0.0000 | No |
| 49246 | Zfp78     | 0.0000 | No |
| 49247 | Zfp780b   | 0.0000 | No |
| 49248 | Zfp783    | 0.0000 | No |
| 49249 | Zfp784    | 0.0000 | No |
| 49250 | Zfp786    | 0.0000 | No |
| 49251 | Zfp787    | 0.0000 | No |
| 49252 | Zfp788    | 0.0000 | No |
| 49253 | Zfp790    | 0.0000 | No |
| 49254 | Zfp791    | 0.0000 | No |
| 49255 | Zfp799    | 0.0000 | No |
| 49256 | Zfp800    | 0.0000 | No |
| 49257 | Zfp804b   | 0.0000 | No |
| 49258 | Zfp808    | 0.0000 | No |
| 49259 | Zfp809    | 0.0000 | No |
| 49260 | Zfp81     | 0.0000 | No |
| 49261 | Zfp810    | 0.0000 | No |
| 49262 | Zfp811    | 0.0000 | No |
| 49263 | Zfp813-ps | 0.0000 | No |

|       |           |        |    |
|-------|-----------|--------|----|
| 49264 | Zfp819    | 0.0000 | No |
| 49265 | Zfp82     | 0.0000 | No |
| 49266 | Zfp820    | 0.0000 | No |
| 49267 | Zfp821    | 0.0000 | No |
| 49268 | Zfp825    | 0.0000 | No |
| 49269 | Zfp827    | 0.0000 | No |
| 49270 | Zfp830    | 0.0000 | No |
| 49271 | Zfp831    | 0.0000 | No |
| 49272 | Zfp839    | 0.0000 | No |
| 49273 | Zfp84     | 0.0000 | No |
| 49274 | Zfp846    | 0.0000 | No |
| 49275 | Zfp85     | 0.0000 | No |
| 49276 | Zfp850    | 0.0000 | No |
| 49277 | Zfp85os   | 0.0000 | No |
| 49278 | Zfp862-ps | 0.0000 | No |
| 49279 | Zfp865    | 0.0000 | No |
| 49280 | Zfp866    | 0.0000 | No |
| 49281 | Zfp867    | 0.0000 | No |
| 49282 | Zfp868    | 0.0000 | No |
| 49283 | Zfp869    | 0.0000 | No |
| 49284 | Zfp87     | 0.0000 | No |
| 49285 | Zfp870    | 0.0000 | No |
| 49286 | Zfp871    | 0.0000 | No |
| 49287 | Zfp872    | 0.0000 | No |
| 49288 | Zfp873    | 0.0000 | No |
| 49289 | Zfp874a   | 0.0000 | No |
| 49290 | Zfp874b   | 0.0000 | No |
| 49291 | Zfp879    | 0.0000 | No |
| 49292 | Zfp882    | 0.0000 | No |
| 49293 | Zfp9      | 0.0000 | No |
| 49294 | Zfp90     | 0.0000 | No |
| 49295 | Zfp91     | 0.0000 | No |
| 49296 | Zfp92     | 0.0000 | No |
| 49297 | Zfp93     | 0.0000 | No |
| 49298 | Zfp930    | 0.0000 | No |
| 49299 | Zfp931    | 0.0000 | No |
| 49300 | Zfp932    | 0.0000 | No |
| 49301 | Zfp933    | 0.0000 | No |
| 49302 | Zfp934    | 0.0000 | No |
| 49303 | Zfp935    | 0.0000 | No |
| 49304 | Zfp936    | 0.0000 | No |
| 49305 | Zfp937    | 0.0000 | No |
| 49306 | Zfp938    | 0.0000 | No |
| 49307 | Zfp939    | 0.0000 | No |
| 49308 | Zfp94     | 0.0000 | No |
| 49309 | Zfp940    | 0.0000 | No |



|       |         |        |    |
|-------|---------|--------|----|
| 49310 | Zfp941  | 0.0000 | No |
| 49311 | Zfp942  | 0.0000 | No |
| 49312 | Zfp943  | 0.0000 | No |
| 49313 | Zfp944  | 0.0000 | No |
| 49314 | Zfp945  | 0.0000 | No |
| 49315 | Zfp946  | 0.0000 | No |
| 49316 | Zfp947  | 0.0000 | No |
| 49317 | Zfp948  | 0.0000 | No |
| 49318 | Zfp949  | 0.0000 | No |
| 49319 | Zfp950  | 0.0000 | No |
| 49320 | Zfp951  | 0.0000 | No |
| 49321 | Zfp952  | 0.0000 | No |
| 49322 | Zfp953  | 0.0000 | No |
| 49323 | Zfp954  | 0.0000 | No |
| 49324 | Zfp955a | 0.0000 | No |
| 49325 | Zfp955b | 0.0000 | No |
| 49326 | Zfp956  | 0.0000 | No |
| 49327 | Zfp957  | 0.0000 | No |
| 49328 | Zfp958  | 0.0000 | No |
| 49329 | Zfp959  | 0.0000 | No |
| 49330 | Zfp960  | 0.0000 | No |
| 49331 | Zfp961  | 0.0000 | No |
| 49332 | Zfp963  | 0.0000 | No |
| 49333 | Zfp964  | 0.0000 | No |
| 49334 | Zfp965  | 0.0000 | No |
| 49335 | Zfp966  | 0.0000 | No |
| 49336 | Zfp967  | 0.0000 | No |
| 49337 | Zfp968  | 0.0000 | No |
| 49338 | Zfp969  | 0.0000 | No |
| 49339 | Zfp97   | 0.0000 | No |
| 49340 | Zfp970  | 0.0000 | No |
| 49341 | Zfp971  | 0.0000 | No |
| 49342 | Zfp972  | 0.0000 | No |
| 49343 | Zfp974  | 0.0000 | No |
| 49344 | Zfp975  | 0.0000 | No |
| 49345 | Zfp976  | 0.0000 | No |
| 49346 | Zfp977  | 0.0000 | No |
| 49347 | Zfp978  | 0.0000 | No |
| 49348 | Zfp979  | 0.0000 | No |
| 49349 | Zfp981  | 0.0000 | No |
| 49350 | Zfp982  | 0.0000 | No |
| 49351 | Zfp983  | 0.0000 | No |
| 49352 | Zfp984  | 0.0000 | No |
| 49353 | Zfp985  | 0.0000 | No |
| 49354 | Zfp986  | 0.0000 | No |
| 49355 | Zfp988  | 0.0000 | No |

|       |          |        |    |
|-------|----------|--------|----|
| 49356 | Zfp990   | 0.0000 | No |
| 49357 | Zfp991   | 0.0000 | No |
| 49358 | Zfp992   | 0.0000 | No |
| 49359 | Zfp994   | 0.0000 | No |
| 49360 | Zfp995   | 0.0000 | No |
| 49361 | Zfpl1    | 0.0000 | No |
| 49362 | Zfp-ps   | 0.0000 | No |
| 49363 | Zfr      | 0.0000 | No |
| 49364 | Zfr2     | 0.0000 | No |
| 49365 | Zfx      | 0.0000 | No |
| 49366 | Zfy1     | 0.0000 | No |
| 49367 | Zfyve1   | 0.0000 | No |
| 49368 | Zfyve16  | 0.0000 | No |
| 49369 | Zfyve19  | 0.0000 | No |
| 49370 | Zfyve21  | 0.0000 | No |
| 49371 | Zfyve26  | 0.0000 | No |
| 49372 | Zfyve27  | 0.0000 | No |
| 49373 | Zfyve28  | 0.0000 | No |
| 49374 | Zfyve9   | 0.0000 | No |
| 49375 | Zg16     | 0.0000 | No |
| 49376 | Zglp1    | 0.0000 | No |
| 49377 | Zgrf1    | 0.0000 | No |
| 49378 | Zhx1     | 0.0000 | No |
| 49379 | Zhx2     | 0.0000 | No |
| 49380 | Zhx3     | 0.0000 | No |
| 49381 | Zic1     | 0.0000 | No |
| 49382 | Zic2     | 0.0000 | No |
| 49383 | Zic3     | 0.0000 | No |
| 49384 | Zic4     | 0.0000 | No |
| 49385 | Zic5     | 0.0000 | No |
| 49386 | Zik1     | 0.0000 | No |
| 49387 | Zim1     | 0.0000 | No |
| 49388 | Zim3     | 0.0000 | No |
| 49389 | Zkscan1  | 0.0000 | No |
| 49390 | Zkscan14 | 0.0000 | No |
| 49391 | Zkscan16 | 0.0000 | No |
| 49392 | Zkscan17 | 0.0000 | No |
| 49393 | Zkscan2  | 0.0000 | No |
| 49394 | Zkscan4  | 0.0000 | No |
| 49395 | Zkscan5  | 0.0000 | No |
| 49396 | Zkscan6  | 0.0000 | No |
| 49397 | Zkscan7  | 0.0000 | No |
| 49398 | Zkscan8  | 0.0000 | No |
| 49399 | Zmat1    | 0.0000 | No |
| 49400 | Zmat2    | 0.0000 | No |
| 49401 | Zmat3    | 0.0000 | No |

|       |          |        |    |
|-------|----------|--------|----|
| 49402 | Zmat4    | 0.0000 | No |
| 49403 | Zmat5    | 0.0000 | No |
| 49404 | Zmiz1    | 0.0000 | No |
| 49405 | Zmiz1os1 | 0.0000 | No |
| 49406 | Zmiz2    | 0.0000 | No |
| 49407 | Zmpste24 | 0.0000 | No |
| 49408 | Zmym1    | 0.0000 | No |
| 49409 | Zmym2    | 0.0000 | No |
| 49410 | Zmym3    | 0.0000 | No |
| 49411 | Zmym4    | 0.0000 | No |
| 49412 | Zmym5    | 0.0000 | No |
| 49413 | Zmym6    | 0.0000 | No |
| 49414 | Zmynd10  | 0.0000 | No |
| 49415 | Zmynd11  | 0.0000 | No |
| 49416 | Zmynd12  | 0.0000 | No |
| 49417 | Zmynd15  | 0.0000 | No |
| 49418 | Zmynd19  | 0.0000 | No |
| 49419 | Zmynd8   | 0.0000 | No |
| 49420 | Znf41-ps | 0.0000 | No |
| 49421 | Znfx1    | 0.0000 | No |
| 49422 | Znhit1   | 0.0000 | No |
| 49423 | Znhit2   | 0.0000 | No |
| 49424 | Znhit3   | 0.0000 | No |
| 49425 | Znhit6   | 0.0000 | No |
| 49426 | Znrd1    | 0.0000 | No |
| 49427 | Znrd1as  | 0.0000 | No |
| 49428 | Znrf1    | 0.0000 | No |
| 49429 | Znrf2    | 0.0000 | No |
| 49430 | Znrf3    | 0.0000 | No |
| 49431 | Znrf4    | 0.0000 | No |
| 49432 | Zp2      | 0.0000 | No |
| 49433 | Zp3r     | 0.0000 | No |
| 49434 | Zpbp     | 0.0000 | No |
| 49435 | Zpbp2    | 0.0000 | No |
| 49436 | Zpld1    | 0.0000 | No |
| 49437 | Zpr1     | 0.0000 | No |
| 49438 | Zranb1   | 0.0000 | No |
| 49439 | Zranb2   | 0.0000 | No |
| 49440 | Zranb3   | 0.0000 | No |
| 49441 | Zrsr1    | 0.0000 | No |
| 49442 | Zrsr2    | 0.0000 | No |
| 49443 | Zscan10  | 0.0000 | No |
| 49444 | Zscan12  | 0.0000 | No |
| 49445 | Zscan18  | 0.0000 | No |
| 49446 | Zscan2   | 0.0000 | No |
| 49447 | Zscan20  | 0.0000 | No |

|       |            |        |    |
|-------|------------|--------|----|
| 49448 | Zscan21    | 0.0000 | No |
| 49449 | Zscan22    | 0.0000 | No |
| 49450 | Zscan25    | 0.0000 | No |
| 49451 | Zscan26    | 0.0000 | No |
| 49452 | Zscan29    | 0.0000 | No |
| 49453 | Zscan30    | 0.0000 | No |
| 49454 | Zscan4a    | 0.0000 | No |
| 49455 | Zscan4b    | 0.0000 | No |
| 49456 | Zscan4d    | 0.0000 | No |
| 49457 | Zscan4e    | 0.0000 | No |
| 49458 | Zscan4f    | 0.0000 | No |
| 49459 | Zscan4-ps2 | 0.0000 | No |
| 49460 | Zscan4-ps3 | 0.0000 | No |
| 49461 | Zswim1     | 0.0000 | No |
| 49462 | Zswim2     | 0.0000 | No |
| 49463 | Zswim3     | 0.0000 | No |
| 49464 | Zswim4     | 0.0000 | No |
| 49465 | Zswim5     | 0.0000 | No |
| 49466 | Zswim6     | 0.0000 | No |
| 49467 | Zswim7     | 0.0000 | No |
| 49468 | Zswim8     | 0.0000 | No |
| 49469 | Zufsp      | 0.0000 | No |
| 49470 | Zw10       | 0.0000 | No |
| 49471 | Zwilch     | 0.0000 | No |
| 49472 | Zwint      | 0.0000 | No |
| 49473 | Zxda       | 0.0000 | No |
| 49474 | Zxdb       | 0.0000 | No |
| 49475 | Zxdc       | 0.0000 | No |
| 49476 | Zyg11a     | 0.0000 | No |
| 49477 | Zyg11b     | 0.0000 | No |
| 49478 | Zyx        | 0.0000 | No |
| 49479 | Zzef1      | 0.0000 | No |
| 49480 | Zzz3       | 0.0000 | No |
