# Supplementary material for: Identifying the Immunological Gene Signatures of Immune Cell Subtypes
Source: Hindawi journal article supplement (doi:10.1155/2021/6639698), 2021-01-01
Supplement: f2 [file 6639698.f2.pdf]

|      |       |       |       |       |       |       |
|------|-------|-------|-------|-------|-------|-------|
| 3730 | 1.000 | 1.000 | 1.000 | 1.000 | 1.000 | 1.000 |
| 3740 | 1.000 | 1.000 | 0.923 | 1.000 | 0.991 | 0.987 |
| 3750 | 1.000 | 1.000 | 1.000 | 1.000 | 1.000 | 1.000 |
| 3760 | 1.000 | 1.000 | 1.000 | 1.000 | 1.000 | 1.000 |
| 3770 | 1.000 | 1.000 | 0.923 | 1.000 | 0.991 | 0.987 |
| 3780 | 1.000 | 1.000 | 1.000 | 1.000 | 1.000 | 1.000 |
| 3790 | 1.000 | 1.000 | 1.000 | 1.000 | 1.000 | 1.000 |
| 3800 | 1.000 | 1.000 | 1.000 | 1.000 | 1.000 | 1.000 |
| 3810 | 1.000 | 1.000 | 1.000 | 1.000 | 1.000 | 1.000 |
| 3820 | 1.000 | 1.000 | 0.923 | 1.000 | 0.991 | 0.987 |
| 3830 | 1.000 | 1.000 | 0.846 | 1.000 | 0.982 | 0.975 |
| 3840 | 1.000 | 1.000 | 0.923 | 1.000 | 0.991 | 0.987 |
| 3850 | 1.000 | 1.000 | 1.000 | 1.000 | 1.000 | 1.000 |
| 3860 | 1.000 | 1.000 | 1.000 | 1.000 | 1.000 | 1.000 |
| 3870 | 1.000 | 1.000 | 1.000 | 1.000 | 1.000 | 1.000 |
| 3880 | 1.000 | 1.000 | 1.000 | 1.000 | 1.000 | 1.000 |
| 3890 | 1.000 | 1.000 | 1.000 | 1.000 | 1.000 | 1.000 |
| 3900 | 1.000 | 1.000 | 1.000 | 1.000 | 1.000 | 1.000 |
| 3910 | 1.000 | 1.000 | 1.000 | 1.000 | 1.000 | 1.000 |
| 3920 | 1.000 | 1.000 | 1.000 | 1.000 | 1.000 | 1.000 |
| 3930 | 1.000 | 1.000 | 0.923 | 1.000 | 0.991 | 0.987 |
| 3940 | 1.000 | 1.000 | 0.923 | 1.000 | 0.991 | 0.987 |
| 3950 | 1.000 | 1.000 | 0.923 | 1.000 | 0.991 | 0.987 |
| 3960 | 1.000 | 1.000 | 0.923 | 1.000 | 0.991 | 0.987 |
| 3970 | 1.000 | 1.000 | 0.923 | 1.000 | 0.991 | 0.987 |
| 3980 | 1.000 | 1.000 | 1.000 | 1.000 | 1.000 | 1.000 |
| 3990 | 1.000 | 1.000 | 1.000 | 1.000 | 1.000 | 1.000 |
| 4000 | 1.000 | 1.000 | 0.923 | 1.000 | 0.991 | 0.987 |
| 4010 | 1.000 | 1.000 | 1.000 | 1.000 | 1.000 | 1.000 |
| 4020 | 1.000 | 1.000 | 1.000 | 1.000 | 1.000 | 1.000 |
| 4030 | 1.000 | 1.000 | 1.000 | 1.000 | 1.000 | 1.000 |
| 4040 | 1.000 | 1.000 | 0.923 | 1.000 | 0.991 | 0.987 |
| 4050 | 1.000 | 1.000 | 1.000 | 1.000 | 1.000 | 1.000 |
| 4060 | 1.000 | 1.000 | 0.923 | 1.000 | 0.991 | 0.987 |
| 4070 | 1.000 | 1.000 | 0.923 | 1.000 | 0.991 | 0.987 |
| 4080 | 1.000 | 1.000 | 1.000 | 1.000 | 1.000 | 1.000 |
| 4090 | 1.000 | 1.000 | 1.000 | 1.000 | 1.000 | 1.000 |
| 4100 | 1.000 | 1.000 | 1.000 | 1.000 | 1.000 | 1.000 |
| 4110 | 1.000 | 1.000 | 1.000 | 1.000 | 1.000 | 1.000 |
| 4120 | 1.000 | 1.000 | 1.000 | 1.000 | 1.000 | 1.000 |
| 4130 | 1.000 | 1.000 | 0.923 | 1.000 | 0.991 | 0.987 |
| 4140 | 1.000 | 1.000 | 1.000 | 1.000 | 1.000 | 1.000 |
| 4150 | 1.000 | 1.000 | 1.000 | 1.000 | 1.000 | 1.000 |
| 4160 | 1.000 | 1.000 | 1.000 | 1.000 | 1.000 | 1.000 |
| 4170 | 1.000 | 1.000 | 1.000 | 1.000 | 1.000 | 1.000 |
| 4180 | 1.000 | 1.000 | 1.000 | 1.000 | 1.000 | 1.000 |
| 4190 | 1.000 | 1.000 | 1.000 | 1.000 | 1.000 | 1.000 |
| 4200 | 1.000 | 1.000 | 0.923 | 1.000 | 0.991 | 0.987 |
| 4210 | 1.000 | 1.000 | 1.000 | 1.000 | 1.000 | 1.000 |
| 4220 | 1.000 | 1.000 | 0.923 | 1.000 | 0.991 | 0.987 |
| 4230 | 1.000 | 1.000 | 1.000 | 1.000 | 1.000 | 1.000 |
| 4240 | 1.000 | 1.000 | 1.000 | 1.000 | 1.000 | 1.000 |
| 4250 | 1.000 | 1.000 | 1.000 | 1.000 | 1.000 | 1.000 |
| 4260 | 1.000 | 1.000 | 1.000 | 1.000 | 1.000 | 1.000 |



|      |       |       |       |       |       |       |
|------|-------|-------|-------|-------|-------|-------|
| 4270 | 1.000 | 1.000 | 0.923 | 1.000 | 0.991 | 0.987 |
| 4280 | 1.000 | 1.000 | 0.923 | 1.000 | 0.991 | 0.987 |
| 4290 | 1.000 | 1.000 | 1.000 | 1.000 | 1.000 | 1.000 |
| 4300 | 1.000 | 1.000 | 0.846 | 1.000 | 0.982 | 0.975 |
| 4310 | 1.000 | 1.000 | 0.769 | 1.000 | 0.973 | 0.962 |
| 4320 | 1.000 | 1.000 | 0.923 | 1.000 | 0.991 | 0.987 |
| 4330 | 1.000 | 1.000 | 1.000 | 1.000 | 1.000 | 1.000 |
| 4340 | 1.000 | 1.000 | 1.000 | 1.000 | 1.000 | 1.000 |
| 4350 | 1.000 | 1.000 | 1.000 | 1.000 | 1.000 | 1.000 |
| 4360 | 1.000 | 1.000 | 0.923 | 1.000 | 0.991 | 0.987 |
| 4370 | 1.000 | 1.000 | 1.000 | 1.000 | 1.000 | 1.000 |
| 4380 | 1.000 | 1.000 | 1.000 | 1.000 | 1.000 | 1.000 |
| 4390 | 1.000 | 1.000 | 1.000 | 1.000 | 1.000 | 1.000 |
| 4400 | 1.000 | 1.000 | 0.846 | 1.000 | 0.982 | 0.975 |
| 4410 | 1.000 | 1.000 | 0.923 | 1.000 | 0.991 | 0.987 |
| 4420 | 1.000 | 1.000 | 0.846 | 1.000 | 0.982 | 0.975 |
| 4430 | 1.000 | 1.000 | 1.000 | 1.000 | 1.000 | 1.000 |
| 4440 | 1.000 | 1.000 | 1.000 | 1.000 | 1.000 | 1.000 |
| 4450 | 1.000 | 1.000 | 1.000 | 1.000 | 1.000 | 1.000 |
| 4460 | 1.000 | 1.000 | 1.000 | 1.000 | 1.000 | 1.000 |
| 4470 | 1.000 | 1.000 | 1.000 | 1.000 | 1.000 | 1.000 |
| 4480 | 1.000 | 1.000 | 1.000 | 1.000 | 1.000 | 1.000 |
| 4490 | 1.000 | 1.000 | 0.846 | 1.000 | 0.982 | 0.975 |
| 4500 | 1.000 | 1.000 | 1.000 | 1.000 | 1.000 | 1.000 |
| 4510 | 1.000 | 1.000 | 1.000 | 1.000 | 1.000 | 1.000 |
| 4520 | 1.000 | 1.000 | 1.000 | 1.000 | 1.000 | 1.000 |
| 4530 | 1.000 | 1.000 | 1.000 | 1.000 | 1.000 | 1.000 |
| 4540 | 1.000 | 1.000 | 1.000 | 1.000 | 1.000 | 1.000 |
| 4550 | 1.000 | 1.000 | 0.923 | 1.000 | 0.991 | 0.987 |
| 4560 | 1.000 | 1.000 | 0.923 | 1.000 | 0.991 | 0.987 |
| 4570 | 1.000 | 1.000 | 1.000 | 1.000 | 1.000 | 1.000 |
| 4580 | 1.000 | 1.000 | 1.000 | 1.000 | 1.000 | 1.000 |
| 4590 | 1.000 | 1.000 | 1.000 | 1.000 | 1.000 | 1.000 |
| 4600 | 1.000 | 1.000 | 1.000 | 1.000 | 1.000 | 1.000 |
| 4610 | 1.000 | 1.000 | 1.000 | 1.000 | 1.000 | 1.000 |
| 4620 | 1.000 | 1.000 | 1.000 | 1.000 | 1.000 | 1.000 |
| 4630 | 1.000 | 1.000 | 0.923 | 1.000 | 0.991 | 0.987 |
| 4640 | 1.000 | 1.000 | 0.923 | 1.000 | 0.991 | 0.987 |
| 4650 | 1.000 | 1.000 | 0.846 | 1.000 | 0.982 | 0.975 |
| 4660 | 1.000 | 1.000 | 1.000 | 1.000 | 1.000 | 1.000 |
| 4670 | 1.000 | 1.000 | 1.000 | 1.000 | 1.000 | 1.000 |
| 4680 | 1.000 | 1.000 | 1.000 | 1.000 | 1.000 | 1.000 |
| 4690 | 1.000 | 1.000 | 0.923 | 1.000 | 0.991 | 0.987 |
| 4700 | 1.000 | 1.000 | 0.923 | 1.000 | 0.991 | 0.987 |
| 4710 | 1.000 | 1.000 | 1.000 | 1.000 | 1.000 | 1.000 |
| 4720 | 1.000 | 1.000 | 0.923 | 1.000 | 0.991 | 0.987 |
| 4730 | 1.000 | 1.000 | 1.000 | 1.000 | 1.000 | 1.000 |
| 4740 | 1.000 | 1.000 | 1.000 | 1.000 | 1.000 | 1.000 |
| 4750 | 1.000 | 1.000 | 1.000 | 1.000 | 1.000 | 1.000 |
| 4760 | 1.000 | 1.000 | 0.846 | 1.000 | 0.982 | 0.975 |
| 4770 | 1.000 | 1.000 | 1.000 | 1.000 | 1.000 | 1.000 |
| 4780 | 1.000 | 1.000 | 0.923 | 1.000 | 0.991 | 0.987 |
| 4790 | 1.000 | 1.000 | 1.000 | 1.000 | 1.000 | 1.000 |
| 4800 | 1.000 | 1.000 | 0.923 | 1.000 | 0.991 | 0.987 |

|      |       |       |       |       |       |       |
|------|-------|-------|-------|-------|-------|-------|
| 4810 | 1.000 | 1.000 | 1.000 | 1.000 | 1.000 | 1.000 |
| 4820 | 1.000 | 1.000 | 0.923 | 1.000 | 0.991 | 0.987 |
| 4830 | 1.000 | 1.000 | 0.923 | 1.000 | 0.991 | 0.987 |
| 4840 | 1.000 | 1.000 | 0.846 | 1.000 | 0.982 | 0.975 |
| 4850 | 1.000 | 1.000 | 0.923 | 1.000 | 0.991 | 0.987 |
| 4860 | 1.000 | 1.000 | 0.923 | 1.000 | 0.991 | 0.987 |
| 4870 | 1.000 | 1.000 | 1.000 | 1.000 | 1.000 | 1.000 |
| 4880 | 1.000 | 1.000 | 1.000 | 1.000 | 1.000 | 1.000 |
| 4890 | 1.000 | 1.000 | 1.000 | 1.000 | 1.000 | 1.000 |
| 4900 | 1.000 | 1.000 | 0.923 | 1.000 | 0.991 | 0.987 |
| 4910 | 1.000 | 1.000 | 1.000 | 1.000 | 1.000 | 1.000 |
| 4920 | 1.000 | 1.000 | 0.923 | 1.000 | 0.991 | 0.987 |
| 4930 | 1.000 | 1.000 | 0.923 | 1.000 | 0.991 | 0.987 |
| 4940 | 1.000 | 1.000 | 1.000 | 1.000 | 1.000 | 1.000 |
| 4950 | 1.000 | 1.000 | 1.000 | 1.000 | 1.000 | 1.000 |
| 4960 | 1.000 | 1.000 | 0.923 | 1.000 | 0.991 | 0.987 |
| 4970 | 1.000 | 1.000 | 1.000 | 1.000 | 1.000 | 1.000 |
| 4980 | 1.000 | 1.000 | 0.923 | 1.000 | 0.991 | 0.987 |
| 4990 | 1.000 | 1.000 | 1.000 | 1.000 | 1.000 | 1.000 |
| 5000 | 1.000 | 1.000 | 0.846 | 1.000 | 0.982 | 0.975 |
| 5010 | 1.000 | 1.000 | 0.923 | 1.000 | 0.991 | 0.987 |
| 5020 | 1.000 | 1.000 | 0.923 | 1.000 | 0.991 | 0.987 |
| 5030 | 1.000 | 1.000 | 1.000 | 1.000 | 1.000 | 1.000 |
| 5040 | 1.000 | 1.000 | 0.923 | 1.000 | 0.991 | 0.987 |
| 5050 | 1.000 | 1.000 | 0.923 | 1.000 | 0.991 | 0.987 |
| 5060 | 1.000 | 1.000 | 0.923 | 1.000 | 0.991 | 0.987 |
| 5070 | 1.000 | 1.000 | 0.923 | 1.000 | 0.991 | 0.987 |
| 5080 | 1.000 | 1.000 | 1.000 | 1.000 | 1.000 | 1.000 |
| 5090 | 1.000 | 1.000 | 1.000 | 1.000 | 1.000 | 1.000 |
| 5100 | 1.000 | 1.000 | 1.000 | 1.000 | 1.000 | 1.000 |
| 5110 | 1.000 | 1.000 | 0.923 | 1.000 | 0.991 | 0.987 |
| 5120 | 1.000 | 1.000 | 0.923 | 1.000 | 0.991 | 0.987 |
| 5130 | 1.000 | 1.000 | 0.923 | 1.000 | 0.991 | 0.987 |
| 5140 | 1.000 | 1.000 | 1.000 | 1.000 | 1.000 | 1.000 |
| 5150 | 1.000 | 1.000 | 0.923 | 1.000 | 0.991 | 0.987 |
| 5160 | 1.000 | 1.000 | 0.923 | 1.000 | 0.991 | 0.987 |
| 5170 | 1.000 | 1.000 | 1.000 | 1.000 | 1.000 | 1.000 |
| 5180 | 1.000 | 1.000 | 1.000 | 1.000 | 1.000 | 1.000 |
| 5190 | 1.000 | 1.000 | 0.923 | 1.000 | 0.991 | 0.987 |
| 5200 | 1.000 | 1.000 | 0.923 | 1.000 | 0.991 | 0.987 |
| 5210 | 1.000 | 1.000 | 1.000 | 1.000 | 1.000 | 1.000 |
| 5220 | 1.000 | 1.000 | 1.000 | 1.000 | 1.000 | 1.000 |
| 5230 | 1.000 | 1.000 | 0.923 | 1.000 | 0.991 | 0.987 |
| 5240 | 1.000 | 1.000 | 1.000 | 1.000 | 1.000 | 1.000 |
| 5250 | 1.000 | 1.000 | 0.923 | 1.000 | 0.991 | 0.987 |
| 5260 | 1.000 | 1.000 | 0.923 | 1.000 | 0.991 | 0.987 |
| 5270 | 1.000 | 1.000 | 1.000 | 1.000 | 1.000 | 1.000 |
| 5280 | 1.000 | 1.000 | 1.000 | 1.000 | 1.000 | 1.000 |
| 5290 | 1.000 | 1.000 | 0.923 | 1.000 | 0.991 | 0.987 |
| 5300 | 1.000 | 1.000 | 0.769 | 1.000 | 0.973 | 0.962 |
| 5310 | 1.000 | 1.000 | 1.000 | 1.000 | 1.000 | 1.000 |
| 5320 | 1.000 | 1.000 | 1.000 | 1.000 | 1.000 | 1.000 |
| 5330 | 1.000 | 1.000 | 0.923 | 1.000 | 0.991 | 0.987 |
| 5340 | 1.000 | 1.000 | 1.000 | 1.000 | 1.000 | 1.000 |



|      |       |       |       |       |       |       |
|------|-------|-------|-------|-------|-------|-------|
| 5890 | 1.000 | 1.000 | 0.923 | 1.000 | 0.991 | 0.987 |
| 5900 | 1.000 | 1.000 | 0.923 | 1.000 | 0.991 | 0.987 |
| 5910 | 1.000 | 1.000 | 1.000 | 1.000 | 1.000 | 1.000 |
| 5920 | 1.000 | 1.000 | 0.769 | 1.000 | 0.973 | 0.962 |
| 5930 | 1.000 | 1.000 | 1.000 | 1.000 | 1.000 | 1.000 |
| 5940 | 1.000 | 1.000 | 0.923 | 1.000 | 0.991 | 0.987 |
| 5950 | 1.000 | 1.000 | 0.846 | 1.000 | 0.982 | 0.975 |
| 5960 | 1.000 | 1.000 | 0.923 | 1.000 | 0.991 | 0.987 |
| 5970 | 1.000 | 1.000 | 1.000 | 1.000 | 1.000 | 1.000 |
| 5980 | 1.000 | 1.000 | 1.000 | 1.000 | 1.000 | 1.000 |
| 5990 | 1.000 | 1.000 | 0.923 | 1.000 | 0.991 | 0.987 |
| 6000 | 1.000 | 1.000 | 0.923 | 1.000 | 0.991 | 0.987 |
