# Supplementary material for: Identifying the Immunological Gene Signatures of Immune Cell Subtypes
Source: Hindawi journal article supplement (doi:10.1155/2021/6639698), 2021-01-01
Supplement: f3 [file 6639698.f3.pdf]

**Table S3.** Performance of IFS with RF when using different number of features ranked by MCFS with step size of 1.

| <b>Number of features</b> | <b><math>\alpha\beta</math>T cells</b> | <b>B cells</b> | <b><math>\gamma\delta</math> T cells</b> | <b>innate lymphocytes</b> | <b>ACC</b> | <b>MCC</b> |
|---------------------------|----------------------------------------|----------------|------------------------------------------|---------------------------|------------|------------|
| 1                         | 1.000                                  | 1.000          | 0.000                                    | 0.000                     | 0.705      | 0.610      |
| 2                         | 0.804                                  | 0.970          | 0.538                                    | 1.000                     | 0.857      | 0.798      |
| 3                         | 0.848                                  | 1.000          | 0.154                                    | 1.000                     | 0.839      | 0.768      |
| 4                         | 0.804                                  | 1.000          | 0.077                                    | 1.000                     | 0.813      | 0.730      |
| 5                         | 0.978                                  | 1.000          | 1.000                                    | 1.000                     | 0.991      | 0.987      |
| 6                         | 1.000                                  | 1.000          | 1.000                                    | 1.000                     | 1.000      | 1.000      |
| 7                         | 1.000                                  | 1.000          | 1.000                                    | 1.000                     | 1.000      | 1.000      |
| 8                         | 1.000                                  | 1.000          | 1.000                                    | 1.000                     | 1.000      | 1.000      |
| 9                         | 1.000                                  | 1.000          | 1.000                                    | 1.000                     | 1.000      | 1.000      |
| 10                        | 1.000                                  | 1.000          | 1.000                                    | 1.000                     | 1.000      | 1.000      |
| 11                        | 1.000                                  | 1.000          | 1.000                                    | 1.000                     | 1.000      | 1.000      |
| 12                        | 1.000                                  | 1.000          | 1.000                                    | 1.000                     | 1.000      | 1.000      |
| 13                        | 1.000                                  | 1.000          | 1.000                                    | 1.000                     | 1.000      | 1.000      |
| 14                        | 1.000                                  | 1.000          | 1.000                                    | 1.000                     | 1.000      | 1.000      |
| 15                        | 1.000                                  | 1.000          | 1.000                                    | 1.000                     | 1.000      | 1.000      |
| 16                        | 1.000                                  | 1.000          | 1.000                                    | 1.000                     | 1.000      | 1.000      |
| 17                        | 1.000                                  | 1.000          | 1.000                                    | 1.000                     | 1.000      | 1.000      |
| 18                        | 1.000                                  | 1.000          | 1.000                                    | 1.000                     | 1.000      | 1.000      |
| 19                        | 1.000                                  | 1.000          | 1.000                                    | 1.000                     | 1.000      | 1.000      |
| 20                        | 1.000                                  | 1.000          | 1.000                                    | 1.000                     | 1.000      | 1.000      |
| 21                        | 1.000                                  | 1.000          | 1.000                                    | 1.000                     | 1.000      | 1.000      |
| 22                        | 1.000                                  | 1.000          | 1.000                                    | 1.000                     | 1.000      | 1.000      |
| 23                        | 1.000                                  | 1.000          | 1.000                                    | 1.000                     | 1.000      | 1.000      |
| 24                        | 1.000                                  | 1.000          | 1.000                                    | 1.000                     | 1.000      | 1.000      |
| 25                        | 1.000                                  | 1.000          | 1.000                                    | 1.000                     | 1.000      | 1.000      |
| 26                        | 1.000                                  | 1.000          | 1.000                                    | 1.000                     | 1.000      | 1.000      |
| 27                        | 1.000                                  | 1.000          | 1.000                                    | 1.000                     | 1.000      | 1.000      |
| 28                        | 1.000                                  | 1.000          | 1.000                                    | 1.000                     | 1.000      | 1.000      |
| 29                        | 1.000                                  | 1.000          | 1.000                                    | 1.000                     | 1.000      | 1.000      |
| 30                        | 1.000                                  | 1.000          | 1.000                                    | 1.000                     | 1.000      | 1.000      |
| 31                        | 1.000                                  | 1.000          | 1.000                                    | 1.000                     | 1.000      | 1.000      |
| 32                        | 1.000                                  | 1.000          | 1.000                                    | 1.000                     | 1.000      | 1.000      |
| 33                        | 1.000                                  | 1.000          | 1.000                                    | 1.000                     | 1.000      | 1.000      |
| 34                        | 1.000                                  | 1.000          | 1.000                                    | 1.000                     | 1.000      | 1.000      |
| 35                        | 1.000                                  | 1.000          | 1.000                                    | 1.000                     | 1.000      | 1.000      |
| 36                        | 1.000                                  | 1.000          | 1.000                                    | 1.000                     | 1.000      | 1.000      |
| 37                        | 1.000                                  | 1.000          | 1.000                                    | 1.000                     | 1.000      | 1.000      |
| 38                        | 1.000                                  | 1.000          | 1.000                                    | 1.000                     | 1.000      | 1.000      |
| 39                        | 1.000                                  | 1.000          | 1.000                                    | 1.000                     | 1.000      | 1.000      |
| 40                        | 1.000                                  | 1.000          | 1.000                                    | 1.000                     | 1.000      | 1.000      |
| 41                        | 1.000                                  | 1.000          | 1.000                                    | 1.000                     | 1.000      | 1.000      |

|    |       |       |       |       |       |       |
|----|-------|-------|-------|-------|-------|-------|
| 42 | 1.000 | 1.000 | 1.000 | 1.000 | 1.000 | 1.000 |
| 43 | 1.000 | 1.000 | 1.000 | 1.000 | 1.000 | 1.000 |
| 44 | 1.000 | 1.000 | 1.000 | 1.000 | 1.000 | 1.000 |
| 45 | 1.000 | 1.000 | 1.000 | 1.000 | 1.000 | 1.000 |
| 46 | 1.000 | 1.000 | 1.000 | 1.000 | 1.000 | 1.000 |
| 47 | 1.000 | 1.000 | 1.000 | 1.000 | 1.000 | 1.000 |
| 48 | 1.000 | 1.000 | 1.000 | 1.000 | 1.000 | 1.000 |
| 49 | 1.000 | 1.000 | 1.000 | 1.000 | 1.000 | 1.000 |
